# Supplementary material for: Compression of Large Sets of Sequence Data Reveals Fine Diversification of Functional Profiles in Multigene Families of Proteins: A Study for Peptidyl-Prolyl cis/trans Isomerases (PPIase)
Source: MDPI journal article supplement (doi:10.3390/biom9020059), 2019-02-11
Supplement: s1 [file s1]

List of entries for analyses of FKBP36 – only FKBD domains

- ( 1) NP\_003593 inactive peptidyl-prolyl cis-trans isomerase FKBP6 isoform a [Homo sapiens].
- ( 2) XP\_003815624 inactive peptidyl-prolyl cis-trans isomerase FKBP6 isoform X1 [Pan paniscus].
- ( 3) XP\_003777068 inactive peptidyl-prolyl cis-trans isomerase FKBP6 isoform X1 [Pongo abelii].
- ( 4) XP\_003276647 PREDICTED: inactive peptidyl-prolyl cis-trans isomerase FKBP6 [Nomascus leuco]
- ( 5) XP\_003895916 inactive peptidyl-prolyl cis-trans isomerase FKBP6 isoform X1 [Papio anubis].
- ( 6) EHH17242 Peptidyl-prolyl cis-trans isomerase FKBP6 [Macaca mulatta].
- ( 7) XP\_001110932 PREDICTED: inactive peptidyl-prolyl cis-trans isomerase FKBP6 isoform X1 [Mac
- ( 8) XP\_011785750 PREDICTED: inactive peptidyl-prolyl cis-trans isomerase FKBP6 isoform X1 [Col
- ( 9) NP\_001128683 inactive peptidyl-prolyl cis-trans isomerase FKBP6 isoform b [Homo sapiens].
- (10) XP\_017713171 PREDICTED: inactive peptidyl-prolyl cis-trans isomerase FKBP6 isoform X1 [Rhi
- (11) XP\_010385752 PREDICTED: inactive peptidyl-prolyl cis-trans isomerase FKBP6 isoform X1 [Rhi
- (12) XP\_002817917 inactive peptidyl-prolyl cis-trans isomerase FKBP6 isoform X2 [Pongo abelii].
- (13) XP\_004045599 PREDICTED: inactive peptidyl-prolyl cis-trans isomerase FKBP6 isoform X1 [Gor
- (14) XP\_008979905 PREDICTED: inactive peptidyl-prolyl cis-trans isomerase FKBP6 isoform X2 [Cal
- (15) XP\_016868230 inactive peptidyl-prolyl cis-trans isomerase FKBP6 isoform X1 [Homo sapiens].
- (16) XP\_003794239 inactive peptidyl-prolyl cis-trans isomerase FKBP6 isoform X1 [Otolemur garne
- (17) XP\_012597698 inactive peptidyl-prolyl cis-trans isomerase FKBP6 isoform X1 [Microcebus mur
- (18) XP\_011931834 PREDICTED: inactive peptidyl-prolyl cis-trans isomerase FKBP6 isoform X2 [Cer
- (19) XP\_003895917 inactive peptidyl-prolyl cis-trans isomerase FKBP6 isoform X2 [Papio anubis].
- (20) XP\_008016547 PREDICTED: LOW QUALITY PROTEIN: inactive peptidyl-prolyl cis-trans isomerase
- (21) XP\_003934167 PREDICTED: inactive peptidyl-prolyl cis-trans isomerase FKBP6 isoform X1 [Sai
- (22) XP\_012495716 PREDICTED: inactive peptidyl-prolyl cis-trans isomerase FKBP6 isoform X1 [Pro
- (23) XP\_012304459 inactive peptidyl-prolyl cis-trans isomerase FKBP6 isoform X1 [Aotus nancymaa
- (24) XP\_022357643 inactive peptidyl-prolyl cis-trans isomerase FKBP6 isoform X1 [Enhydra lutris
- (25) XP\_010385754 PREDICTED: inactive peptidyl-prolyl cis-trans isomerase FKBP6 isoform X3 [Rhi
- (26) XP\_017895560 PREDICTED: inactive peptidyl-prolyl cis-trans isomerase FKBP6 isoform X2 [Cap
- (27) XP\_005892900 PREDICTED: inactive peptidyl-prolyl cis-trans isomerase FKBP6 isoform X2 [Bos
- (28) XP\_010852603 PREDICTED: inactive peptidyl-prolyl cis-trans isomerase FKBP6 isoform X2 [Bis
- (29) XP\_546928 inactive peptidyl-prolyl cis-trans isomerase FKBP6 [Canis lupus familiaris].
- (30) XP\_005225237 inactive peptidyl-prolyl cis-trans isomerase FKBP6 isoform X1 [Bos taurus].
- (31) XP\_021556246 inactive peptidyl-prolyl cis-trans isomerase FKBP6 isoform X1 [Neomonachus sc
- (32) XP\_011978492 PREDICTED: inactive peptidyl-prolyl cis-trans isomerase FKBP6 isoform X1 [Ovi
- (33) NP\_001296390 inactive peptidyl-prolyl cis-trans isomerase FKBP6 [Equus caballus].
- (34) XP\_011959859 PREDICTED: inactive peptidyl-prolyl cis-trans isomerase FKBP6 isoform X1 [Ovi
- (35) XP\_006942097 inactive peptidyl-prolyl cis-trans isomerase FKBP6 [Felis catus].
- (36) XP\_007100028 inactive peptidyl-prolyl cis-trans isomerase FKBP6 isoform X2 [Physeter catod
- (37) XP\_005972253 PREDICTED: peptidyl-prolyl cis-trans isomerase FKBP6 isoform X2 [Pantholops h
- (38) XP\_019277206 PREDICTED: inactive peptidyl-prolyl cis-trans isomerase FKBP6 [Panthera pardus
- (39) XP\_014705926 PREDICTED: inactive peptidyl-prolyl cis-trans isomerase FKBP6 [Equus asinus].
- (40) XP\_008540619 PREDICTED: inactive peptidyl-prolyl cis-trans isomerase FKBP6 [Equus przewals
- (41) XP\_020752493 inactive peptidyl-prolyl cis-trans isomerase FKBP6 isoform X1 [Odocoileus vir
- (42) XP\_014988800 PREDICTED: inactive peptidyl-prolyl cis-trans isomerase FKBP6 isoform X2 [Mac
- (43) XP\_011785755 PREDICTED: inactive peptidyl-prolyl cis-trans isomerase FKBP6 isoform X2 [Col
- (44) XP\_022444356 inactive peptidyl-prolyl cis-trans isomerase FKBP6 isoform X2 [Delphinapterus
- (45) XP\_008979887 PREDICTED: inactive peptidyl-prolyl cis-trans isomerase FKBP6 isoform X1 [Cal
- (46) XP\_004399150 PREDICTED: inactive peptidyl-prolyl cis-trans isomerase FKBP6 isoform X1 [Odo
- (47) XP\_004268847 PREDICTED: inactive peptidyl-prolyl cis-trans isomerase FKBP6 isoform X1 [Orc
- (48) XP\_019659608 PREDICTED: inactive peptidyl-prolyl cis-trans isomerase FKBP6 [Ailuropoda mel
- (49) XP\_024602986 inactive peptidyl-prolyl cis-trans isomerase FKBP6 isoform X1 [Neophocaena as
- (50) XP\_007186614 PREDICTED: peptidyl-prolyl cis-trans isomerase FKBP6 isoform X1 [Balaenoptera
- (51) XP\_014652016 PREDICTED: inactive peptidyl-prolyl cis-trans isomerase FKBP6 [Ceratotherium
- (52) XP\_012597701 inactive peptidyl-prolyl cis-trans isomerase FKBP6 isoform X2 [Microcebus mur
- (53) XP\_004761711 PREDICTED: inactive peptidyl-prolyl cis-trans isomerase FKBP6 isoform X1 [Mus
- (54) XP\_004317177 PREDICTED: inactive peptidyl-prolyl cis-trans isomerase FKBP6 isoform X1 [Tur

( 55) XP\_005892901 PREDICTED: inactive peptidyl-prolyl cis-trans isomerase FKBP6 isoform X1 [Bos  
( 56) XP\_017895559 PREDICTED: inactive peptidyl-prolyl cis-trans isomerase FKBP6 isoform X1 [Cap  
( 57) XP\_005662030 inactive peptidyl-prolyl cis-trans isomerase FKBP6 isoform X1 [Sus scrofa].  
( 58) XP\_010852604 PREDICTED: inactive peptidyl-prolyl cis-trans isomerase FKBP6 isoform X3 [Bis  
( 59) XP\_010852602 PREDICTED: inactive peptidyl-prolyl cis-trans isomerase FKBP6 isoform X1 [Bis  
( 60) EPY83956 peptidyl-prolyl cis-trans isomerase FKBP6 [Camelus ferus].  
( 61) NP\_001095679 inactive peptidyl-prolyl cis-trans isomerase FKBP6 [Bos taurus].  
( 62) XP\_008139950 PREDICTED: inactive peptidyl-prolyl cis-trans isomerase FKBP6 [Eptesicus fusc  
( 63) XP\_010970644 PREDICTED: inactive peptidyl-prolyl cis-trans isomerase FKBP6 [Camelus bactri  
( 64) XP\_004021020 PREDICTED: inactive peptidyl-prolyl cis-trans isomerase FKBP6 isoform X2 [Ovi  
( 65) XP\_015450070 inactive peptidyl-prolyl cis-trans isomerase FKBP6 [Pteropus alecto].  
( 66) XP\_017516100 PREDICTED: inactive peptidyl-prolyl cis-trans isomerase FKBP6 [Manis javanica  
( 67) XP\_010342933 PREDICTED: inactive peptidyl-prolyl cis-trans isomerase FKBP6 isoform X2 [Sai  
( 68) XP\_006057167 PREDICTED: peptidyl-prolyl cis-trans isomerase FKBP6 [Bubalus bubalis].  
( 69) XP\_019843968 PREDICTED: inactive peptidyl-prolyl cis-trans isomerase FKBP6 [Bos indicus].  
( 70) XP\_006201442 PREDICTED: inactive peptidyl-prolyl cis-trans isomerase FKBP6 [Vicugna pacos]  
( 71) XP\_005972252 PREDICTED: peptidyl-prolyl cis-trans isomerase FKBP6 isoform X1 [Pantholops h  
( 72) XP\_004380900 inactive peptidyl-prolyl cis-trans isomerase FKBP6 [Trichechus manatus latiro  
( 73) XP\_007468850 PREDICTED: peptidyl-prolyl cis-trans isomerase FKBP6 isoform X2 [Lipotes vexi  
( 74) XP\_007100027 inactive peptidyl-prolyl cis-trans isomerase FKBP6 isoform X1 [Physeter catod  
( 75) XP\_008966786 inactive peptidyl-prolyl cis-trans isomerase FKBP6 isoform X2 [Pan paniscus].  
( 76) XP\_020017458 inactive peptidyl-prolyl cis-trans isomerase FKBP6 [Castor canadensis].  
( 77) XP\_006088351 inactive peptidyl-prolyl cis-trans isomerase FKBP6 [Myotis lucifugus].  
( 78) XP\_020752496 inactive peptidyl-prolyl cis-trans isomerase FKBP6 isoform X2 [Odocoileus vir  
( 79) XP\_022444355 inactive peptidyl-prolyl cis-trans isomerase FKBP6 isoform X1 [Delphinapterus  
( 80) XP\_006773483 PREDICTED: inactive peptidyl-prolyl cis-trans isomerase FKBP6 [Myotis davidii  
( 81) XP\_012304461 inactive peptidyl-prolyl cis-trans isomerase FKBP6 isoform X3 [Aotus nancymaa  
( 82) XP\_008591583 PREDICTED: inactive peptidyl-prolyl cis-trans isomerase FKBP6 [Galeopterus va  
( 83) XP\_016054558 PREDICTED: inactive peptidyl-prolyl cis-trans isomerase FKBP6 [Miniopterus na  
( 84) XP\_011369980 inactive peptidyl-prolyl cis-trans isomerase FKBP6 [Pteropus vampyrus].  
( 85) XP\_004268849 PREDICTED: inactive peptidyl-prolyl cis-trans isomerase FKBP6 isoform X2 [Orc  
( 86) XP\_024602987 inactive peptidyl-prolyl cis-trans isomerase FKBP6 isoform X2 [Neophocaena as  
( 87) XP\_019610492 PREDICTED: inactive peptidyl-prolyl cis-trans isomerase FKBP6 [Rhinolophus si  
( 88) XP\_004317179 PREDICTED: inactive peptidyl-prolyl cis-trans isomerase FKBP6 isoform X2 [Tur  
( 89) XP\_006889852 PREDICTED: peptidyl-prolyl cis-trans isomerase FKBP6 [Elephantulus edwardii].  
( 90) XP\_007940604 PREDICTED: inactive peptidyl-prolyl cis-trans isomerase FKBP6 [Orycteropus af  
( 91) XP\_014411577 PREDICTED: inactive peptidyl-prolyl cis-trans isomerase FKBP6 [Camelus ferus]  
( 92) XP\_007073943 PREDICTED: inactive peptidyl-prolyl cis-trans isomerase FKBP6 [Panthera tigr  
( 93) XP\_006155025 PREDICTED: inactive peptidyl-prolyl cis-trans isomerase FKBP6 isoform X1 [Tup  
( 94) XP\_005328656 inactive peptidyl-prolyl cis-trans isomerase FKBP6 [Ictidomys tridecemlineatu  
( 95) XP\_011765609 inactive peptidyl-prolyl cis-trans isomerase FKBP6 isoform X5 [Macaca nemestr  
( 96) XP\_010979058 PREDICTED: inactive peptidyl-prolyl cis-trans isomerase FKBP6 [Camelus dromed  
( 97) XP\_006249193 PREDICTED: inactive peptidyl-prolyl cis-trans isomerase FKBP6 isoform X2 [Rat  
( 98) XP\_002722023 PREDICTED: inactive peptidyl-prolyl cis-trans isomerase FKBP6 [Oryctolagus cu  
( 99) XP\_005344683 PREDICTED: inactive peptidyl-prolyl cis-trans isomerase FKBP6 isoform X2 [Mic  
( 100) XP\_020941978 inactive peptidyl-prolyl cis-trans isomerase FKBP6 isoform X2 [Sus scrofa].  
( 101) XP\_006859898 PREDICTED: peptidyl-prolyl cis-trans isomerase FKBP6 [Chrysochloris asiatica]  
( 102) XP\_005549416 PREDICTED: inactive peptidyl-prolyl cis-trans isomerase FKBP6 isoform X5 [Mac  
( 103) XP\_024427494 inactive peptidyl-prolyl cis-trans isomerase FKBP6 [Desmodus rotundus].  
( 104) XP\_016001971 PREDICTED: inactive peptidyl-prolyl cis-trans isomerase FKBP6 [Rousettus aegy  
( 105) XP\_007468849 PREDICTED: peptidyl-prolyl cis-trans isomerase FKBP6 isoform X1 [Lipotes vexi  
( 106) XP\_014988802 PREDICTED: inactive peptidyl-prolyl cis-trans isomerase FKBP6 isoform X3 [Mac  
( 107) XP\_012584338 PREDICTED: inactive peptidyl-prolyl cis-trans isomerase FKBP6 [Condylura cris  
( 108) XP\_006971358 PREDICTED: inactive peptidyl-prolyl cis-trans isomerase FKBP6 isoform X2 [Per  
( 109) XP\_004620930 PREDICTED: inactive peptidyl-prolyl cis-trans isomerase FKBP6 [Sorex araneus]  
( 110) XP\_008696858 PREDICTED: inactive peptidyl-prolyl cis-trans isomerase FKBP6 [Ursus maritimu

(111) XP\_021018812 inactive peptidyl-prolyl cis-trans isomerase FKBP6 isoform X2 [Mus caroli].

(112) XP\_012782940 PREDICTED: inactive peptidyl-prolyl cis-trans isomerase FKBP6 [Ochotona princeps].

(113) XP\_019502388 PREDICTED: inactive peptidyl-prolyl cis-trans isomerase FKBP6 isoform X1 [Hippoboscidae].

(114) XP\_021042681 inactive peptidyl-prolyl cis-trans isomerase FKBP6 isoform X2 [Mus pahari].

(115) NP\_001264821 inactive peptidyl-prolyl cis-trans isomerase FKBP6 isoform 2 [Mus musculus].

(116) XP\_021519217 inactive peptidyl-prolyl cis-trans isomerase FKBP6 isoform X2 [Meriones unguiculatus].

(117) XP\_005344682 PREDICTED: inactive peptidyl-prolyl cis-trans isomerase FKBP6 isoform X1 [Microtus].

(118) NP\_001349718 inactive peptidyl-prolyl cis-trans isomerase FKBP6 isoform d [Homo sapiens].

(119) NP\_001099392 inactive peptidyl-prolyl cis-trans isomerase FKBP6 [Rattus norvegicus].

(120) XP\_005396843 PREDICTED: inactive peptidyl-prolyl cis-trans isomerase FKBP6 [Chinchilla lanigera].

(121) XP\_019502390 PREDICTED: inactive peptidyl-prolyl cis-trans isomerase FKBP6 isoform X2 [Hippoboscidae].

(122) XP\_006971357 PREDICTED: inactive peptidyl-prolyl cis-trans isomerase FKBP6 isoform X1 [Peromyscus].

(123) XP\_008966787 inactive peptidyl-prolyl cis-trans isomerase FKBP6 isoform X3 [Pan paniscus].

(124) XP\_003500991 PREDICTED: inactive peptidyl-prolyl cis-trans isomerase FKBP6 [Cricetulus griseus].

(125) XP\_008846596 PREDICTED: inactive peptidyl-prolyl cis-trans isomerase FKBP6 [Nannospalax galati].

(126) XP\_021563404 inactive peptidyl-prolyl cis-trans isomerase FKBP6 [Carlito syrichta].

(127) XP\_018887307 PREDICTED: inactive peptidyl-prolyl cis-trans isomerase FKBP6 isoform X2 [Gorilla].

(128) XP\_021018806 inactive peptidyl-prolyl cis-trans isomerase FKBP6 isoform X1 [Mus caroli].

(129) XP\_017176678 PREDICTED: inactive peptidyl-prolyl cis-trans isomerase FKBP6 isoform X2 [Mus musculus].

(130) NP\_291049 inactive peptidyl-prolyl cis-trans isomerase FKBP6 isoform 1 [Mus musculus].

(131) XP\_021042679 inactive peptidyl-prolyl cis-trans isomerase FKBP6 isoform X1 [Mus pahari].

(132) XP\_010617304 PREDICTED: inactive peptidyl-prolyl cis-trans isomerase FKBP6 isoform X1 [Fukushima].

(133) XP\_021519216 inactive peptidyl-prolyl cis-trans isomerase FKBP6 isoform X1 [Meriones unguiculatus].

(134) XP\_023420891 LOW QUALITY PROTEIN: inactive peptidyl-prolyl cis-trans isomerase FKBP6 [Caviidae].

(135) XP\_006155027 PREDICTED: inactive peptidyl-prolyl cis-trans isomerase FKBP6 isoform X2 [Tupaia].

(136) XP\_011765605 inactive peptidyl-prolyl cis-trans isomerase FKBP6 isoform X1 [Macaca nemestrina].

(137) XP\_015302699 PREDICTED: inactive peptidyl-prolyl cis-trans isomerase FKBP6 isoform X1 [Macaca nemestrina].

(138) XP\_011765611 inactive peptidyl-prolyl cis-trans isomerase FKBP6 isoform X7 [Macaca nemestrina].

(139) XP\_012597702 inactive peptidyl-prolyl cis-trans isomerase FKBP6 isoform X3 [Microcebus murinus].

(140) XP\_014988803 PREDICTED: inactive peptidyl-prolyl cis-trans isomerase FKBP6 isoform X4 [Macaca nemestrina].

(141) XP\_010617307 PREDICTED: inactive peptidyl-prolyl cis-trans isomerase FKBP6 isoform X2 [Fukushima].

(142) XP\_004666244 PREDICTED: inactive peptidyl-prolyl cis-trans isomerase FKBP6 [Jaculus jaculus].

(143) XP\_004630630 inactive peptidyl-prolyl cis-trans isomerase FKBP6 [Octodon degus].

(144) XP\_004840130 inactive peptidyl-prolyl cis-trans isomerase FKBP6 isoform X1 [Heterocephalus glaber].

(145) XP\_014403986 PREDICTED: inactive peptidyl-prolyl cis-trans isomerase FKBP6 [Myotis brandtii].

(146) XP\_016800790 inactive peptidyl-prolyl cis-trans isomerase FKBP6 isoform X3 [Pan troglodytes].

(147) XP\_014988804 PREDICTED: inactive peptidyl-prolyl cis-trans isomerase FKBP6 isoform X5 [Macaca nemestrina].

(148) ELK06863 FK506-binding protein 6 [Pteropus alecto].

(149) EHB08283 FK506-binding protein 6 [Heterocephalus glaber].

(150) XP\_004706046 PREDICTED: inactive peptidyl-prolyl cis-trans isomerase FKBP6 [Echinops telfairi].

(151) XP\_021110082 inactive peptidyl-prolyl cis-trans isomerase FKBP6 isoform X2 [Heterocephalus glaber].

(152) XP\_007518064 PREDICTED: inactive peptidyl-prolyl cis-trans isomerase FKBP6 [Erinaceus europaeus].

(153) PNI92595 FKBP6 isoform 5, partial [Pan troglodytes].

(154) XP\_020861399 inactive peptidyl-prolyl cis-trans isomerase FKBP6 isoform X1 [Phascogalea].

(155) XP\_016284889 PREDICTED: inactive peptidyl-prolyl cis-trans isomerase FKBP6 isoform X2 [Monodelphis].

(156) XP\_016284888 PREDICTED: inactive peptidyl-prolyl cis-trans isomerase FKBP6 isoform X1 [Monodelphis].

(157) XP\_001519210 PREDICTED: inactive peptidyl-prolyl cis-trans isomerase FKBP6 isoform X2 [Ornithomimus].

(158) XP\_020861404 inactive peptidyl-prolyl cis-trans isomerase FKBP6 isoform X2 [Phascogalea].

(159) XP\_014425414 inactive peptidyl-prolyl cis-trans isomerase FKBP6, partial [Pelodiscus sinensis].

(160) XP\_004761713 PREDICTED: inactive peptidyl-prolyl cis-trans isomerase FKBP6 isoform X2 [Mus musculus].

(161) XP\_007441600 inactive peptidyl-prolyl cis-trans isomerase FKBP6 [Python bivittatus].

(162) XP\_016080873 PREDICTED: inactive peptidyl-prolyl cis-trans isomerase FKBP6 isoform X1 [Ornithomimus].

(163) XP\_024066689 inactive peptidyl-prolyl cis-trans isomerase FKBP6 isoform X1 [Terrapene mexicana].

(164) XP\_019365238 PREDICTED: inactive peptidyl-prolyl cis-trans isomerase FKBP6, partial [Gavia].

(165) XP\_019401968 PREDICTED: inactive peptidyl-prolyl cis-trans isomerase FKBP6 isoform X1 [Crotophaga].

(166) XP\_013926437 PREDICTED: inactive peptidyl-prolyl cis-trans isomerase FKBP6 isoform X1 [Thalassidroma].

(167) XP\_019401969 PREDICTED: inactive peptidyl-prolyl cis-trans isomerase FKBP6 isoform X2 [Cro  
 (168) XP\_015269029 PREDICTED: inactive peptidyl-prolyl cis-trans isomerase FKBP6 [Gekko japonicu  
 (169) XP\_014464913 PREDICTED: inactive peptidyl-prolyl cis-trans isomerase FKBP6 isoform X2 [All  
 (170) XP\_006258869 PREDICTED: inactive peptidyl-prolyl cis-trans isomerase FKBP6 isoform X1 [All  
 (171) XP\_005344684 PREDICTED: inactive peptidyl-prolyl cis-trans isomerase FKBP6 isoform X3 [Mic  
 (172) XP\_015670323 PREDICTED: inactive peptidyl-prolyl cis-trans isomerase FKBP6 [Protobothrops  
 (173) XP\_020662988 inactive peptidyl-prolyl cis-trans isomerase FKBP6 isoform X1 [Pogona vittice  
 (174) XP\_007065519 PREDICTED: peptidyl-prolyl cis-trans isomerase FKBP6 [Chelonia mydas].  
 (175) XP\_020662989 inactive peptidyl-prolyl cis-trans isomerase FKBP6 isoform X2 [Pogona vittice  
 (176) XP\_020662990 inactive peptidyl-prolyl cis-trans isomerase FKBP6 isoform X3 [Pogona vittice  
 (177) XP\_025051231 inactive peptidyl-prolyl cis-trans isomerase FKBP6, partial [Alligator sinens  
 (178) KYO33272 inactive peptidyl-prolyl cis-trans isomerase FKBP6 [Alligator mississippiensi  
 (179) XP\_021018814 inactive peptidyl-prolyl cis-trans isomerase FKBP6 isoform X3 [Mus caroli].  
 (180) OBS57796 hypothetical protein A6R68\_11069 [Neotoma lepida].  
 (181) NP\_001264822 inactive peptidyl-prolyl cis-trans isomerase FKBP6 isoform 3 [Mus musculus].  
 (182) XP\_021042683 inactive peptidyl-prolyl cis-trans isomerase FKBP6 isoform X4 [Mus pahari].  
 (183) XP\_021519218 inactive peptidyl-prolyl cis-trans isomerase FKBP6 isoform X3 [Meriones ungui  
 (184) XP\_024653358 inactive peptidyl-prolyl cis-trans isomerase FKBP6 isoform X3 [Macaca nemestr  
 (185) XP\_009678488 PREDICTED: inactive peptidyl-prolyl cis-trans isomerase FKBP6 [Struthio camel  
 (186) XP\_015302701 PREDICTED: inactive peptidyl-prolyl cis-trans isomerase FKBP6 isoform X2 [Mac  
 (187) XP\_003770271 inactive peptidyl-prolyl cis-trans isomerase FKBP6 [Sarcophilus harrisii].  
 (188) ETE73718 Peptidyl-prolyl cis-trans isomerase FKBP6, partial [Ophiophagus hannah].  
 (189) NP\_989052 inactive peptidyl-prolyl cis-trans isomerase FKBP6 [Xenopus tropicalis].  
 (190) NP\_001085204 FK506 binding protein 6 L homeolog [Xenopus laevis].  
 (191) XP\_011592867 PREDICTED: inactive peptidyl-prolyl cis-trans isomerase FKBP6 [Aquila chrysa  
 (192) XP\_010584273 PREDICTED: inactive peptidyl-prolyl cis-trans isomerase FKBP6 [Haliaeetus leu  
 (193) XP\_017946629 PREDICTED: inactive peptidyl-prolyl cis-trans isomerase FKBP6 isoform X1 [Xen  
 (194) XP\_008109385 PREDICTED: inactive peptidyl-prolyl cis-trans isomerase FKBP6 isoform X1 [Ano  
 (195) XP\_021271278 inactive peptidyl-prolyl cis-trans isomerase FKBP6 [Numida meleagris].  
 (196) XP\_023074397 inactive peptidyl-prolyl cis-trans isomerase FKBP6 [Piliocolobus tephrosceles  
 (197) XP\_015151391 inactive peptidyl-prolyl cis-trans isomerase FKBP6 isoform X1 [Gallus gallus]  
 (198) XP\_018100492 PREDICTED: FK506 binding protein 6 L homeolog isoform X1 [Xenopus laevis].  
 (199) POI24993 hypothetical protein CIB84\_011258 [Bambusicola thoracicus].  
 (200) PNI92596 FKBP6 isoform 6 [Pan troglodytes].  
 (201) XP\_015736491 PREDICTED: inactive peptidyl-prolyl cis-trans isomerase FKBP6 [Coturnix japon  
 (202) XP\_010283169 PREDICTED: inactive peptidyl-prolyl cis-trans isomerase FKBP6, partial [Phaet  
 (203) PNJ85879 FKBP6 isoform 6 [Pongo abelii].  
 (204) XP\_018412624 PREDICTED: inactive peptidyl-prolyl cis-trans isomerase FKBP6, partial [Nanor  
 (205) XP\_010211497 PREDICTED: inactive peptidyl-prolyl cis-trans isomerase FKBP6 [Tinamus guttat  
 (206) XP\_017388864 PREDICTED: inactive peptidyl-prolyl cis-trans isomerase FKBP6 [Cebus capucinu  
 (207) XP\_008109386 PREDICTED: inactive peptidyl-prolyl cis-trans isomerase FKBP6 isoform X2 [Ano  
 (208) XP\_014342809 PREDICTED: inactive peptidyl-prolyl cis-trans isomerase FKBP6 [Latimeria chal  
 (209) KJV84016 Peptidyl-prolyl cis-trans isomerase FKBP6, partial [Struthio camelus australi  
 (210) XP\_013812139 PREDICTED: inactive peptidyl-prolyl cis-trans isomerase FKBP6 [Apteryx austra  
 (211) XP\_009643249 PREDICTED: inactive peptidyl-prolyl cis-trans isomerase FKBP6 [Egretta garzet  
 (212) XP\_009928379 PREDICTED: inactive peptidyl-prolyl cis-trans isomerase FKBP6, partial [Halia  
 (213) XP\_010124464 PREDICTED: inactive peptidyl-prolyl cis-trans isomerase FKBP6, partial [Chlam  
 (214) XP\_009321903 PREDICTED: inactive peptidyl-prolyl cis-trans isomerase FKBP6 [Pygoscelis ade  
 (215) XP\_009807780 PREDICTED: inactive peptidyl-prolyl cis-trans isomerase FKBP6, partial [Gavia  
 (216) XP\_009512874 PREDICTED: inactive peptidyl-prolyl cis-trans isomerase FKBP6, partial [Phala  
 (217) XP\_009586283 PREDICTED: inactive peptidyl-prolyl cis-trans isomerase FKBP6, partial [Fulma  
 (218) KFQ72829 Peptidyl-prolyl cis-trans isomerase FKBP6, partial [Phaethon lepturus].  
 (219) XP\_009698973 PREDICTED: inactive peptidyl-prolyl cis-trans isomerase FKBP6, partial [Caria  
 (220) XP\_009901738 PREDICTED: inactive peptidyl-prolyl cis-trans isomerase FKBP6, partial [Picoi  
 (221) XP\_012887159 PREDICTED: inactive peptidyl-prolyl cis-trans isomerase FKBP6 [Dipodomys ordi  
 (222) XP\_009940812 PREDICTED: inactive peptidyl-prolyl cis-trans isomerase FKBP6 [Opisthocomus h

(223) XP\_002187983 PREDICTED: inactive peptidyl-prolyl cis-trans isomerase FKBP6 [Taeniopygia gu

(224) XP\_009887190 PREDICTED: inactive peptidyl-prolyl cis-trans isomerase FKBP6 [Charadrius voc

(225) XP\_009486380 PREDICTED: inactive peptidyl-prolyl cis-trans isomerase FKBP6, partial [Pelec

(226) KGL76252 Peptidyl-prolyl cis-trans isomerase FKBP6, partial [Tinamus guttatus].

(227) XP\_010306733 PREDICTED: inactive peptidyl-prolyl cis-trans isomerase FKBP6, partial [Balea

(228) XP\_008979919 PREDICTED: inactive peptidyl-prolyl cis-trans isomerase FKBP6 isoform X3 [Cal

(229) XP\_009998510 PREDICTED: inactive peptidyl-prolyl cis-trans isomerase FKBP6 [Chaetura pelag

(230) XP\_009463122 PREDICTED: inactive peptidyl-prolyl cis-trans isomerase FKBP6 [Nipponia nippo

(231) XP\_007894626 PREDICTED: inactive peptidyl-prolyl cis-trans isomerase FKBP6 [Callorhinchus

(232) XP\_010022120 PREDICTED: inactive peptidyl-prolyl cis-trans isomerase FKBP6, partial [Nesto

(233) XP\_010083598 PREDICTED: inactive peptidyl-prolyl cis-trans isomerase FKBP6, partial [Ptero

(234) XP\_010194269 PREDICTED: inactive peptidyl-prolyl cis-trans isomerase FKBP6, partial [Coliu

(235) XP\_009962683 PREDICTED: inactive peptidyl-prolyl cis-trans isomerase FKBP6, partial [Tyto

(236) KFP29338 Peptidyl-prolyl cis-trans isomerase FKBP6, partial [Colius striatus].

(237) XP\_010147897 PREDICTED: inactive peptidyl-prolyl cis-trans isomerase FKBP6 [Eurypyga helia

(238) KFQ39479 Peptidyl-prolyl cis-trans isomerase FKBP6, partial [Mesitornis unicolor].

(239) EOB04024 FK506-binding protein 6, partial [Anas platyrhynchos].

(240) XP\_023675251 inactive peptidyl-prolyl cis-trans isomerase FKBP6 [Paramormyrops kingsleyae]

(241) XP\_009557002 PREDICTED: inactive peptidyl-prolyl cis-trans isomerase FKBP6 [Cuculus canoru

(242) XP\_008944700 PREDICTED: inactive peptidyl-prolyl cis-trans isomerase FKBP6, partial [Merop

(243) KFP93140 Peptidyl-prolyl cis-trans isomerase FKBP6, partial [Haliaeetus albicilla].

(244) KFP44723 Peptidyl-prolyl cis-trans isomerase FKBP6, partial [Chlamydotis macqueenii].

(245) XP\_017553040 PREDICTED: inactive peptidyl-prolyl cis-trans isomerase FKBP6 isoform X1 [Pyg

(246) XP\_021396070 inactive peptidyl-prolyl cis-trans isomerase FKBP6 [Lonchura striata domestic

(247) XP\_010143455 PREDICTED: inactive peptidyl-prolyl cis-trans isomerase FKBP6, partial [Bucer

(248) KFQ87275 Peptidyl-prolyl cis-trans isomerase FKBP6, partial [Phoenicopterus ruber rube

(249) XP\_010891852 PREDICTED: inactive peptidyl-prolyl cis-trans isomerase FKBP6 isoform X2 [Eso

(250) XP\_009863922 PREDICTED: inactive peptidyl-prolyl cis-trans isomerase FKBP6, partial [Apalo

(251) KFW66808 Peptidyl-prolyl cis-trans isomerase FKBP6, partial [Pygoscelis adeliae].

(252) XP\_018591809 PREDICTED: inactive peptidyl-prolyl cis-trans isomerase FKBP6, partial [Scler

(253) KFP21064 Peptidyl-prolyl cis-trans isomerase FKBP6, partial [Egretta garzetta].

(254) KFZ64979 Peptidyl-prolyl cis-trans isomerase FKBP6, partial [Podiceps cristatus].

(255) KFW73903 Peptidyl-prolyl cis-trans isomerase FKBP6, partial [Phalacrocorax carbo].

(256) KFM05579 Peptidyl-prolyl cis-trans isomerase FKBP6, partial [Aptenodytes forsteri].

(257) KFV69563 Peptidyl-prolyl cis-trans isomerase FKBP6, partial [Picoides pubescens].

(258) XP\_023823731 inactive peptidyl-prolyl cis-trans isomerase FKBP6 isoform X3 [Salvelinus alp

(259) XP\_016346087 PREDICTED: inactive peptidyl-prolyl cis-trans isomerase FKBP6-like [Sinocyclo

(260) KFV51798 Peptidyl-prolyl cis-trans isomerase FKBP6, partial [Gavia stellata].

(261) KFW03341 Peptidyl-prolyl cis-trans isomerase FKBP6, partial [Eurypyga helias].

(262) KFV99355 Peptidyl-prolyl cis-trans isomerase FKBP6, partial [Fulmarus glacialis].

(263) OXB56102 hypothetical protein ASZ78\_007956 [Callipepla squamata].

(264) XP\_018958387 PREDICTED: LOW QUALITY PROTEIN: inactive peptidyl-prolyl cis-trans isomerase

(265) XP\_019903677 PREDICTED: inactive peptidyl-prolyl cis-trans isomerase FKBP6 isoform X3 [Eso

(266) KFU91562 Peptidyl-prolyl cis-trans isomerase FKBP6, partial [Chaetura pelagica].

(267) XP\_017314960 PREDICTED: inactive peptidyl-prolyl cis-trans isomerase FKBP6 isoform X1 [Ict

(268) XP\_016393789 PREDICTED: inactive peptidyl-prolyl cis-trans isomerase FKBP6-like [Sinocyclo

(269) XP\_009093115 PREDICTED: inactive peptidyl-prolyl cis-trans isomerase FKBP6 isoform X1 [Ser

(270) XP\_023869471 inactive peptidyl-prolyl cis-trans isomerase FKBP6-like isoform X1 [Salvelinu

(271) XP\_019903679 PREDICTED: inactive peptidyl-prolyl cis-trans isomerase FKBP6 isoform X5 [Eso

(272) XP\_019903678 PREDICTED: inactive peptidyl-prolyl cis-trans isomerase FKBP6 isoform X4 [Eso

(273) XP\_014110391 PREDICTED: inactive peptidyl-prolyl cis-trans isomerase FKBP6 [Pseudopodoces

(274) XP\_017314964 PREDICTED: inactive peptidyl-prolyl cis-trans isomerase FKBP6 isoform X2 [Ict

(275) XP\_019903676 PREDICTED: inactive peptidyl-prolyl cis-trans isomerase FKBP6 isoform X1 [Eso

(276) XP\_015502317 PREDICTED: inactive peptidyl-prolyl cis-trans isomerase FKBP6 isoform X2 [Par

(277) XP\_020341240 inactive peptidyl-prolyl cis-trans isomerase FKBP6 isoform X2 [Oncorhynchus k

(278) NP\_001122145 peptidyl-prolyl cis-trans isomerase FKBP6 [Danio rerio].

(279) OWK52486 Inactive peptidyl-prolyl cis-trans isomerase FKBP6 [*Lonchura striata* domestic  
(280) XP\_013992803 PREDICTED: inactive peptidyl-prolyl cis-trans isomerase FKBP6-like isoform X2  
(281) XP\_024287707 inactive peptidyl-prolyl cis-trans isomerase FKBP6 isoform X1 [*Oncorhynchus t*  
(282) AAH54673 Si:dkey-189h5.5 protein, partial [*Danio rerio*].  
(283) KFP60963 Peptidyl-prolyl cis-trans isomerase FKBP6, partial [*Cariama cristata*].  
(284) XP\_018958370 PREDICTED: inactive peptidyl-prolyl cis-trans isomerase FKBP6-like [*Cyprinus*  
(285) KGL96380 Peptidyl-prolyl cis-trans isomerase FKBP6, partial [*Charadrius vociferus*].  
(286) XP\_016148031 PREDICTED: inactive peptidyl-prolyl cis-trans isomerase FKBP6-like [*Sinocyclo*  
(287) XP\_007245276 inactive peptidyl-prolyl cis-trans isomerase FKBP6 isoform X2 [*Astyanax mexic*  
(288) XP\_023794776 inactive peptidyl-prolyl cis-trans isomerase FKBP6 isoform X1 [*Cyanistes caer*  
(289) XP\_021479427 inactive peptidyl-prolyl cis-trans isomerase FKBP6-like isoform X2 [*Oncorhync*  
(290) KFR16943 Peptidyl-prolyl cis-trans isomerase FKBP6, partial [*Opisthocomus hoazin*].  
(291) XP\_009988051 PREDICTED: inactive peptidyl-prolyl cis-trans isomerase FKBP6, partial [*Taura*  
(292) KfV16869 Peptidyl-prolyl cis-trans isomerase FKBP6, partial [*Pterocles gutturalis*].  
(293) KFO13846 Peptidyl-prolyl cis-trans isomerase FKBP6, partial [*Balearica regulorum gibbe*  
(294) XP\_020373313 inactive peptidyl-prolyl cis-trans isomerase FKBP6 [*Rhincodon typus*].  
(295) XP\_006640997 PREDICTED: inactive peptidyl-prolyl cis-trans isomerase FKBP6 [*Lepisosteus oc*  
(296) XP\_020341239 inactive peptidyl-prolyl cis-trans isomerase FKBP6 isoform X1 [*Oncorhynchus k*  
(297) KQK73326 Peptidyl-prolyl cis-trans isomerase FKBP6 [*Amazona aestiva*].  
(298) XP\_008500186 PREDICTED: inactive peptidyl-prolyl cis-trans isomerase FKBP6 [*Calypte anna*].  
(299) XP\_013992801 PREDICTED: inactive peptidyl-prolyl cis-trans isomerase FKBP6-like isoform X1  
(300) XP\_016350445 PREDICTED: inactive peptidyl-prolyl cis-trans isomerase FKBP6-like [*Sinocyclo*  
(301) KfV47875 Peptidyl-prolyl cis-trans isomerase FKBP6, partial [*Tyto alba*].  
(302) XP\_022534491 inactive peptidyl-prolyl cis-trans isomerase FKBP6 isoform X1 [*Astyanax mexic*  
(303) XP\_021479426 inactive peptidyl-prolyl cis-trans isomerase FKBP6-like isoform X1 [*Oncorhync*  
(304) KfQ96759 Peptidyl-prolyl cis-trans isomerase FKBP6, partial [*Nipponia nippon*].  
(305) XP\_012685286 PREDICTED: inactive peptidyl-prolyl cis-trans isomerase FKBP6 [*Clupea harengu*  
(306) KfQ41466 Peptidyl-prolyl cis-trans isomerase FKBP6, partial [*Nestor notabilis*].  
(307) XP\_024997748 inactive peptidyl-prolyl cis-trans isomerase FKBP6 isoform X2 [*Gallus gallus*]  
(308) KfQ35533 Peptidyl-prolyl cis-trans isomerase FKBP6, partial [*Merops nubicus*].  
(309) XP\_020459257 inactive peptidyl-prolyl cis-trans isomerase FKBP6 isoform X1 [*Monopterus alb*  
(310) XP\_017264554 inactive peptidyl-prolyl cis-trans isomerase FKBP6 isoform X2 [*Kryptolebias m*  
(311) XP\_005917667 PREDICTED: inactive peptidyl-prolyl cis-trans isomerase FKBP6 isoform X2 [*Hap*  
(312) XP\_022621130 inactive peptidyl-prolyl cis-trans isomerase FKBP6 [*Seriola dumerili*].  
(313) XP\_005725080 PREDICTED: inactive peptidyl-prolyl cis-trans isomerase FKBP6 isoform X4 [*Pun*  
(314) XP\_010408101 inactive peptidyl-prolyl cis-trans isomerase FKBP6 isoform X1 [*Corvus cornix*  
(315) KFO74526 Peptidyl-prolyl cis-trans isomerase FKBP6, partial [*Cuculus canorus*].  
(316) XP\_005449739 PREDICTED: inactive peptidyl-prolyl cis-trans isomerase FKBP6 isoform X3 [*Ore*  
(317) XP\_023285908 inactive peptidyl-prolyl cis-trans isomerase FKBP6 [*Seriola lalandi dorsalis*]  
(318) XP\_015502316 PREDICTED: inactive peptidyl-prolyl cis-trans isomerase FKBP6 isoform X1 [*Par*  
(319) XP\_004542108 inactive peptidyl-prolyl cis-trans isomerase FKBP6 isoform X2 [*Maylandia zebr*  
(320) XP\_023823730 E3 ubiquitin-protein ligase rififylin isoform X2 [*Salvelinus alpinus*].  
(321) XP\_020459258 inactive peptidyl-prolyl cis-trans isomerase FKBP6 isoform X2 [*Monopterus alb*  
(322) XP\_008634949 PREDICTED: inactive peptidyl-prolyl cis-trans isomerase FKBP6 isoform X1 [*Cor*  
(323) XP\_013883182 PREDICTED: inactive peptidyl-prolyl cis-trans isomerase FKBP6 [*Austrofundulus*  
(324) XP\_019947232 PREDICTED: inactive peptidyl-prolyl cis-trans isomerase FKBP6 [*Paralichthys o*  
(325) KFP85199 Peptidyl-prolyl cis-trans isomerase FKBP6, partial [*Apaloderma vittatum*].  
(326) PWA27518 hypothetical protein CCH79\_00000105, partial [*Gambusia affinis*].  
(327) XP\_003971664 PREDICTED: inactive peptidyl-prolyl cis-trans isomerase FKBP6 [*Takifugu rubri*  
(328) XP\_005917666 PREDICTED: inactive peptidyl-prolyl cis-trans isomerase FKBP6 isoform X1 [*Hap*  
(329) XP\_013764145 PREDICTED: inactive peptidyl-prolyl cis-trans isomerase FKBP6 isoform X3 [*Pun*  
(330) XP\_013764144 PREDICTED: inactive peptidyl-prolyl cis-trans isomerase FKBP6 isoform X2 [*Pun*  
(331) CAG01803 unnamed protein product, partial [*Tetraodon nigroviridis*].  
(332) XP\_005449738 PREDICTED: inactive peptidyl-prolyl cis-trans isomerase FKBP6 isoform X2 [*Ore*  
(333) KfV20040 Peptidyl-prolyl cis-trans isomerase FKBP6, partial [*Tauraco erythrophus*].  
(334) XP\_018551539 PREDICTED: inactive peptidyl-prolyl cis-trans isomerase FKBP6 [*Lates calcarif*

(335) XP\_004542106 inactive peptidyl-prolyl cis-trans isomerase FKBP6 isoform X1 [Maylandia zebra  
(336) XP\_005808385 inactive peptidyl-prolyl cis-trans isomerase FKBP6 isoform X2 [Xiphophorus ma  
(337) KFO85715 Peptidyl-prolyl cis-trans isomerase FKBP6, partial [Buceros rhinoceros silves  
(338) XP\_015236136 PREDICTED: inactive peptidyl-prolyl cis-trans isomerase FKBP6 [Cyprinodon var  
(339) XP\_023794777 inactive peptidyl-prolyl cis-trans isomerase FKBP6 isoform X2 [Cyanistes caer  
(340) XP\_015803473 PREDICTED: inactive peptidyl-prolyl cis-trans isomerase FKBP6 [Nothobranchius  
(341) KPP68264 hypothetical protein Z043\_113075 [Scleropages formosus].  
(342) XP\_020488061 inactive peptidyl-prolyl cis-trans isomerase FKBP6 [Labrus bergylta].  
(343) XP\_015332442 PREDICTED: inactive peptidyl-prolyl cis-trans isomerase FKBP6, partial [Marmo  
(344) XP\_013764143 PREDICTED: inactive peptidyl-prolyl cis-trans isomerase FKBP6 isoform X1 [Pun  
(345) XP\_005449737 PREDICTED: inactive peptidyl-prolyl cis-trans isomerase FKBP6 isoform X1 [Ore  
(346) KFO61461 Peptidyl-prolyl cis-trans isomerase FKBP6, partial [Corvus brachyrhynchos].  
(347) XP\_008298046 PREDICTED: inactive peptidyl-prolyl cis-trans isomerase FKBP6 [Stegastes part  
(348) KFP07119 Peptidyl-prolyl cis-trans isomerase FKBP6, partial [Calypte anna].  
(349) XP\_007561093 PREDICTED: inactive peptidyl-prolyl cis-trans isomerase FKBP6 isoform X2 [Poe  
(350) PKU35662 peptidyl-prolyl cis-trans isomerase hypothetical protein [Limosa lapponica ba  
(351) XP\_010793476 PREDICTED: inactive peptidyl-prolyl cis-trans isomerase FKBP6 [Notothernia cor  
(352) AWP19851 putative inactive peptidyl-prolyl cis-trans isomerase FKBP6 isoform 3 [Scopht  
(353) KFW82601 Peptidyl-prolyl cis-trans isomerase FKBP6, partial [Manacus vitellinus].  
(354) XP\_008396659 PREDICTED: inactive peptidyl-prolyl cis-trans isomerase FKBP6 isoform X3 [Poe  
(355) XP\_010739761 PREDICTED: inactive peptidyl-prolyl cis-trans isomerase FKBP6 [Larimichthys c  
(356) XP\_022046121 inactive peptidyl-prolyl cis-trans isomerase FKBP6 [Acanthochromis polyacanth  
(357) XP\_019715044 PREDICTED: inactive peptidyl-prolyl cis-trans isomerase FKBP6 [Hippocampus co  
(358) XP\_018875413 PREDICTED: uncharacterized protein LOC101136274 isoform X1 [Gorilla gorilla g  
(359) XP\_014327714 inactive peptidyl-prolyl cis-trans isomerase FKBP6 isoform X1 [Xiphophorus ma  
(360) XP\_009081377 PREDICTED: inactive peptidyl-prolyl cis-trans isomerase FKBP6, partial [Acant  
(361) AWP19849 putative inactive peptidyl-prolyl cis-trans isomerase FKBP6 [Scophthalmus max  
(362) XP\_023134576 inactive peptidyl-prolyl cis-trans isomerase FKBP6 [Amphiprion ocellaris].  
(363) XP\_012734526 inactive peptidyl-prolyl cis-trans isomerase FKBP6 [Fundulus heteroclitus].  
(364) XP\_014403985 PREDICTED: inactive peptidyl-prolyl cis-trans isomerase FKBP6-like [Myotis br  
(365) XP\_017553083 PREDICTED: inactive peptidyl-prolyl cis-trans isomerase FKBP6 isoform X2 [Pyg  
(366) XP\_023869472 inactive peptidyl-prolyl cis-trans isomerase FKBP6-like isoform X2 [Salvelinu  
(367) XP\_013992804 PREDICTED: inactive peptidyl-prolyl cis-trans isomerase FKBP6-like isoform X3  
(368) XP\_020774925 inactive peptidyl-prolyl cis-trans isomerase FKBP6 [Boleophthalmus pectiniros  
(369) XP\_024287709 inactive peptidyl-prolyl cis-trans isomerase FKBP6 isoform X3 [Oncorhynchus t  
(370) XP\_023869475 inactive peptidyl-prolyl cis-trans isomerase FKBP6-like isoform X4 [Salvelinu  
(371) XP\_013992805 PREDICTED: inactive peptidyl-prolyl cis-trans isomerase FKBP6-like isoform X4  
(372) XP\_023869476 inactive peptidyl-prolyl cis-trans isomerase FKBP6-like isoform X5 [Salvelinu  
(373) XP\_024287708 inactive peptidyl-prolyl cis-trans isomerase FKBP6 isoform X2 [Oncorhynchus t  
(374) XP\_023869474 inactive peptidyl-prolyl cis-trans isomerase FKBP6-like isoform X3 [Salvelinu  
(375) XP\_011490382 inactive peptidyl-prolyl cis-trans isomerase FKBP6 isoform X3 [Oryzias latipe  
(376) XP\_020570387 inactive peptidyl-prolyl cis-trans isomerase FKBP6 isoform X2 [Oryzias latipe  
(377) XP\_008396657 PREDICTED: inactive peptidyl-prolyl cis-trans isomerase FKBP6 isoform X1 [Poe  
(378) XP\_014851597 PREDICTED: inactive peptidyl-prolyl cis-trans isomerase FKBP6 isoform X1 [Poe  
(379) XP\_020570386 inactive peptidyl-prolyl cis-trans isomerase FKBP6 isoform X1 [Oryzias latipe  
(380) XP\_008396658 PREDICTED: inactive peptidyl-prolyl cis-trans isomerase FKBP6 isoform X2 [Poe  
(381) XP\_018774793 PREDICTED: inactive peptidyl-prolyl cis-trans isomerase FKBP6 isoform X2 [Ser  
(382) XP\_023794778 inactive peptidyl-prolyl cis-trans isomerase FKBP6 isoform X3 [Cyanistes caer  
(383) XP\_024147377 inactive peptidyl-prolyl cis-trans isomerase FKBP6 isoform X2 [Oryzias melast  
(384) XP\_024147375 inactive peptidyl-prolyl cis-trans isomerase FKBP6 isoform X1 [Oryzias melast  
(385) XP\_024147378 inactive peptidyl-prolyl cis-trans isomerase FKBP6 isoform X3 [Oryzias melast  
(386) XP\_014851599 PREDICTED: inactive peptidyl-prolyl cis-trans isomerase FKBP6 isoform X3 [Poe  
(387) XP\_008396660 PREDICTED: inactive peptidyl-prolyl cis-trans isomerase FKBP6 isoform X4 [Poe  
(388) XP\_017593619 PREDICTED: inactive peptidyl-prolyl cis-trans isomerase FKBP6 isoform X2 [Cor  
(389) XP\_008396661 PREDICTED: inactive peptidyl-prolyl cis-trans isomerase FKBP6 isoform X5 [Poe  
(390) XP\_014851600 PREDICTED: inactive peptidyl-prolyl cis-trans isomerase FKBP6 isoform X4 [Poe

(391) XP\_019619874 PREDICTED: inactive peptidyl-prolyl cis-trans isomerase FKBP6-like [Branchios  
(392) XP\_016801711 inactive peptidyl-prolyl cis-trans isomerase FKBP6-like isoform X3 [Pan trogl  
(393) XP\_023710706 inactive peptidyl-prolyl cis-trans isomerase FKBP6 [Cryptotermes secundus].  
(394) XP\_020627099 inactive peptidyl-prolyl cis-trans isomerase FKBP6-like [Orbicella faveolata]  
(395) XP\_006793207 PREDICTED: peptidyl-prolyl cis-trans isomerase FKBP6-like [Neolamprologus bri  
(396) XP\_011402831 PREDICTED: inactive peptidyl-prolyl cis-trans isomerase FKBP6-like [Amphimedon  
(397) XP\_022801008 inactive peptidyl-prolyl cis-trans isomerase FKBP6-like [Stylophora pistillata]  
(398) XP\_013786360 inactive peptidyl-prolyl cis-trans isomerase FKBP6-like isoform X2 [Limulus p  
(399) XP\_022254671 inactive peptidyl-prolyl cis-trans isomerase FKBP6-like isoform X1 [Limulus p  
(400) ELT98785 hypothetical protein CAPTEDRAFT\_220934 [Capitella teleta].  
(401) XP\_021353947 inactive peptidyl-prolyl cis-trans isomerase FKBP6-like [Mizuhopecten yessoensis]  
(402) XP\_022108900 inactive peptidyl-prolyl cis-trans isomerase FKBP6-like isoform X2 [Acanthaster  
(403) XP\_022108899 inactive peptidyl-prolyl cis-trans isomerase FKBP6-like isoform X1 [Acanthaster  
(404) XP\_002167164 PREDICTED: inactive peptidyl-prolyl cis-trans isomerase FKBP6-like [Hydra vul  
(405) KOF62423 hypothetical protein OCBIM\_22023537mg, partial [Octopus bimaculoides].  
(406) XP\_014790271 PREDICTED: inactive peptidyl-prolyl cis-trans isomerase FKBP6-like [Octopus b  
(407) XP\_001636239 predicted protein [Nematostella vectensis].  
(408) XP\_023237057 inactive peptidyl-prolyl cis-trans isomerase FKBP6-like [Centruroides sculptu  
(409) XP\_002128893 PREDICTED: inactive peptidyl-prolyl cis-trans isomerase FKBP6 isoform X1 [Cio  
(410) XP\_009051935 hypothetical protein LOTGIDRAFT\_114969 [Lottia gigantea].  
(411) XP\_012221039 PREDICTED: inactive peptidyl-prolyl cis-trans isomerase FKBP6 [Linepithema hu  
(412) XP\_012264923 inactive peptidyl-prolyl cis-trans isomerase FKBP6 [Athalie rosae].  
(413) XP\_009857551 PREDICTED: inactive peptidyl-prolyl cis-trans isomerase FKBP6 isoform X2 [Cio  
(414) XP\_015515854 PREDICTED: inactive peptidyl-prolyl cis-trans isomerase FKBP6 [Neodiprion lec  
(415) XP\_011415211 PREDICTED: inactive peptidyl-prolyl cis-trans isomerase FKBP6 [Crassostrea gi  
(416) XP\_020909274 inactive peptidyl-prolyl cis-trans isomerase FKBP6-like [Exaipasia pallida].  
(417) EKC39444 hypothetical protein CGI\_10020047 [Crassostrea gigas].  
(418) XP\_013405452 inactive peptidyl-prolyl cis-trans isomerase FKBP6-like isoform X2 [Lingula a  
(419) XP\_011148430 inactive peptidyl-prolyl cis-trans isomerase FKBP6 [Harpegnathos saltator].  
(420) XP\_013405451 inactive peptidyl-prolyl cis-trans isomerase FKBP6-like isoform X1 [Lingula a  
(421) PVD31214 hypothetical protein C0Q70\_06626 [Pomacea canaliculata].  
(422) PIK39047 putative inactive peptidyl-prolyl cis-trans isomerase FKBP6 [Apostichopus jap  
(423) XP\_022336187 inactive peptidyl-prolyl cis-trans isomerase FKBP6-like [Crassostrea virginic  
(424) XP\_022337811 inactive peptidyl-prolyl cis-trans isomerase FKBP6-like [Crassostrea virginic  
(425) XP\_014787871 PREDICTED: inactive peptidyl-prolyl cis-trans isomerase FKBP6-like, partial [F  
(426) EFN78601 FK506-binding protein 6 [Harpegnathos saltator].  
(427) XP\_014475449 PREDICTED: inactive peptidyl-prolyl cis-trans isomerase FKBP6 [Dinoponera qua  
(428) XP\_014279621 inactive peptidyl-prolyl cis-trans isomerase FKBP6-like [Halyomorpha halys].  
(429) XP\_022193504 inactive peptidyl-prolyl cis-trans isomerase FKBP6 [Nilaparvata lugens].  
(430) XP\_014204130 inactive peptidyl-prolyl cis-trans isomerase FKBP6 [Copidosoma floridanum].  
(431) KOX75315 Peptidyl-prolyl cis-trans isomerase FKBP6 [Melipona quadrifasciata].  
(432) XP\_014234164 inactive peptidyl-prolyl cis-trans isomerase FKBP6 [Trichogramma pretiosum].  
(433) KII63942 Inactive peptidyl-prolyl cis-trans isomerase FKBP6 [Thelohanellus kitauei].  
(434) XP\_024936423 inactive peptidyl-prolyl cis-trans isomerase FKBP6 isoform X2 [Cephus cinctus  
(435) XP\_015586170 inactive peptidyl-prolyl cis-trans isomerase FKBP6 isoform X1 [Cephus cinctus  
(436) XP\_003486736 inactive peptidyl-prolyl cis-trans isomerase FKBP6 [Bombus impatiens].  
(437) XP\_019882220 PREDICTED: inactive peptidyl-prolyl cis-trans isomerase FKBP6 isoform X1 [Cam  
(438) XP\_003402471 inactive peptidyl-prolyl cis-trans isomerase FKBP6 [Bombus terrestris].  
(439) XP\_012134979 PREDICTED: inactive peptidyl-prolyl cis-trans isomerase FKBP6 isoform X2 [Meg  
(440) XP\_017756606 PREDICTED: inactive peptidyl-prolyl cis-trans isomerase FKBP6 [Eufriesea mexi  
(441) XP\_012134978 PREDICTED: inactive peptidyl-prolyl cis-trans isomerase FKBP6 isoform X1 [Meg  
(442) XP\_003700792 PREDICTED: inactive peptidyl-prolyl cis-trans isomerase FKBP6 isoform X3 [Meg  
(443) XP\_023290805 inactive peptidyl-prolyl cis-trans isomerase FKBP6 isoform X2 [Orussus abieti  
(444) XP\_012270499 inactive peptidyl-prolyl cis-trans isomerase FKBP6 isoform X1 [Orussus abieti  
(445) XP\_018309319 PREDICTED: inactive peptidyl-prolyl cis-trans isomerase FKBP6 isoform X1 [Tra  
(446) XP\_012062619 PREDICTED: inactive peptidyl-prolyl cis-trans isomerase FKBP6 [Atta cephalote



(447) XP\_012527508 PREDICTED: inactive peptidyl-prolyl cis-trans isomerase FKBP6-like [Monomorium  
 (448) XP\_005089179 PREDICTED: inactive peptidyl-prolyl cis-trans isomerase FKBP6-like [Aplysia c  
 (449) XP\_003424555 PREDICTED: inactive peptidyl-prolyl cis-trans isomerase FKBP6 [Nasonia vitrip  
 (450) XP\_018055399 PREDICTED: inactive peptidyl-prolyl cis-trans isomerase FKBP6-like [Atta colo  
 (451) XP\_017877748 PREDICTED: inactive peptidyl-prolyl cis-trans isomerase FKBP6 [Ceratina calca  
 (452) XP\_018399012 PREDICTED: inactive peptidyl-prolyl cis-trans isomerase FKBP6 [Cyphomyrmex co  
 (453) KYM99352 Peptidyl-prolyl cis-trans isomerase FKBP6 [Cyphomyrmex costatus].  
 (454) XP\_018309322 PREDICTED: inactive peptidyl-prolyl cis-trans isomerase FKBP6 isoform X2 [Tra  
 (455) XP\_011647883 inactive peptidyl-prolyl cis-trans isomerase FKBP6 [Pogonomymex barbatus].  
 (456) XP\_014247948 inactive peptidyl-prolyl cis-trans isomerase FKBP6-like isoform X2 [Cimex lec  
 (457) XP\_011064230 PREDICTED: inactive peptidyl-prolyl cis-trans isomerase FKBP6-like [Acromyrm  
 (458) XP\_014613253 PREDICTED: inactive peptidyl-prolyl cis-trans isomerase FKBP6 [Polistes canad  
 (459) XP\_002430548 FK506-binding protein, putative [Pediculus humanus corporis].  
 (460) XP\_014247946 inactive peptidyl-prolyl cis-trans isomerase FKBP6-like isoform X1 [Cimex lec  
 (461) XP\_014270488 inactive peptidyl-prolyl cis-trans isomerase FKBP6 [Halyomorpha halys].  
 (462) ORY30517 hypothetical protein BCR33DRAFT\_724326 [Rhizoclostridium globosum].  
 (463) XP\_011330216 PREDICTED: inactive peptidyl-prolyl cis-trans isomerase FKBP6 [Ooceraea biro  
 (464) EGI60945 FK506-binding protein 6, partial [Acromyrmex echinator].  
 (465) XP\_001201219 PREDICTED: inactive peptidyl-prolyl cis-trans isomerase FKBP6 [Strongylocentr  
 (466) XP\_011061927 PREDICTED: inactive peptidyl-prolyl cis-trans isomerase FKBP6-like [Acromyrm  
 (467) XP\_018356457 PREDICTED: inactive peptidyl-prolyl cis-trans isomerase FKBP6-like isoform X2  
 (468) XP\_011173578 PREDICTED: inactive peptidyl-prolyl cis-trans isomerase FKBP6 [Solenopsis inv  
 (469) XP\_018356456 PREDICTED: inactive peptidyl-prolyl cis-trans isomerase FKBP6-like isoform X1  
 (470) XP\_016917008 PREDICTED: inactive peptidyl-prolyl cis-trans isomerase FKBP6 isoform X2 [Api  
 (471) XP\_018374414 PREDICTED: inactive peptidyl-prolyl cis-trans isomerase FKBP6 [Trachymyrmex c  
 (472) XP\_016917007 PREDICTED: inactive peptidyl-prolyl cis-trans isomerase FKBP6 isoform X1 [Api  
 (473) XP\_019882221 PREDICTED: inactive peptidyl-prolyl cis-trans isomerase shutdown isoform X2 [  
 (474) XP\_011191641 PREDICTED: inactive peptidyl-prolyl cis-trans isomerase shutdown [Zeugodacus  
 (475) PFH33404 peptidyl-prolyl cis-trans isomerase [Besnoitia besnoiti].  
 (476) XP\_019876143 PREDICTED: inactive peptidyl-prolyl cis-trans isomerase shutdown [Aethina tum  
 (477) XP\_014299498 PREDICTED: inactive peptidyl-prolyl cis-trans isomerase FKBP6-like [Microplit  
 (478) KOC63519 Peptidyl-prolyl cis-trans isomerase FKBP6 [Habropoda laboriosa].  
 (479) XP\_015126020 PREDICTED: inactive peptidyl-prolyl cis-trans isomerase FKBP6 [Diachasma allo  
 (480) XP\_005186588 PREDICTED: inactive peptidyl-prolyl cis-trans isomerase shutdown [Musca domes  
 (481) XP\_011879049 PREDICTED: inactive peptidyl-prolyl cis-trans isomerase FKBP6 isoform X2 [Vol  
 (482) XP\_013109471 PREDICTED: inactive peptidyl-prolyl cis-trans isomerase shutdown [Stomoxys ca  
 (483) XP\_011879048 PREDICTED: inactive peptidyl-prolyl cis-trans isomerase FKBP6 isoform X1 [Vol  
 (484) XP\_018333359 PREDICTED: inactive peptidyl-prolyl cis-trans isomerase FKBP6 [Agrilus planip  
 (485) EFZ09302 hypothetical protein SINV\_13600, partial [Solenopsis invicta].  
 (486) XP\_016927793 PREDICTED: inactive peptidyl-prolyl cis-trans isomerase shutdown [Drosophila  
 (487) XP\_006611831 PREDICTED: peptidyl-prolyl cis-trans isomerase FKBP6-like [Apis dorsata].  
 (488) XP\_014245088 inactive peptidyl-prolyl cis-trans isomerase FKBP6-like [Cimex lectularius].  
 (489) XP\_018790058 PREDICTED: inactive peptidyl-prolyl cis-trans isomerase shutdown-like [Bactro  
 (490) XP\_020893545 inactive peptidyl-prolyl cis-trans isomerase FKBP6-like [Exaipatasia pallida].  
 (491) XP\_002092689 uncharacterized protein Dyak\_GE11527 [Drosophila yakuba].  
 (492) XP\_020293583 inactive peptidyl-prolyl cis-trans isomerase FKBP6-like [Pseudomyrmex gracili  
 (493) XP\_016952968 PREDICTED: inactive peptidyl-prolyl cis-trans isomerase shutdown [Drosophila  
 (494) XP\_003689972 PREDICTED: inactive peptidyl-prolyl cis-trans isomerase FKBP6 isoform X1 [Api  
 (495) XP\_015185328 PREDICTED: inactive peptidyl-prolyl cis-trans isomerase FKBP6 [Polistes domin  
 (496) XP\_024867102 inactive peptidyl-prolyl cis-trans isomerase FKBP6 [Temnothorax curvispinosus  
 (497) XP\_011130643 putative peptidyl-prolyl cis-trans isomerase [Gregarina niphandroides].  
 (498) XP\_011206843 PREDICTED: inactive peptidyl-prolyl cis-trans isomerase shutdown [Bactrocera  
 (499) XP\_008560701 PREDICTED: inactive peptidyl-prolyl cis-trans isomerase FKBP6 isoform X2 [Mic  
 (500) XP\_011695993 PREDICTED: inactive peptidyl-prolyl cis-trans isomerase FKBP6-like [Wasmannia  
 (501) PIK55877 putative peptidyl-prolyl cis-trans isomerase FKBP6-like [Apostichopus japonic  
 (502) XP\_022218357 inactive peptidyl-prolyl cis-trans isomerase shutdown [Drosophila obscura].

(503) XP\_017120033 PREDICTED: inactive peptidyl-prolyl cis-trans isomerase shutdown [*Drosophila* (504) XP\_022165811 inactive peptidyl-prolyl cis-trans isomerase FKBP6-like [*Myzus persicae*]. (505) XP\_017070534 PREDICTED: inactive peptidyl-prolyl cis-trans isomerase shutdown [*Drosophila* (506) XP\_001942690 PREDICTED: inactive peptidyl-prolyl cis-trans isomerase FKBP6 [*Acyrtosiphon* (507) XP\_003883131 Peptidylprolyl isomerase D (Cyclophilin D),related [*Neospora caninum* Liverpool (508) XP\_014091483 PREDICTED: inactive peptidyl-prolyl cis-trans isomerase shutdown [*Bactrocera* (509) XP\_015376375 PREDICTED: inactive peptidyl-prolyl cis-trans isomerase FKBP6-like [*Diuraphis* (510) KOF66856 hypothetical protein OCBIM\_22011108mg, partial [*Octopus bimaculoides*]. (511) XP\_015431627 PREDICTED: inactive peptidyl-prolyl cis-trans isomerase shutdown [*Dufourea no* (512) ORX48915 FKBP-like protein [*Piromyces finnis*]. (513) XP\_001958659 uncharacterized protein Dana\_GF12456 [*Drosophila ananassae*]. (514) XP\_013077159 PREDICTED: inactive peptidyl-prolyl cis-trans isomerase FKBP6-like isoform X2 (515) XP\_013077158 PREDICTED: inactive peptidyl-prolyl cis-trans isomerase FKBP6-like isoform X1 (516) XP\_016974015 PREDICTED: inactive peptidyl-prolyl cis-trans isomerase shutdown [*Drosophila* (517) KFG33606 peptidyl-prolyl cis-trans isomerase, partial [*Toxoplasma gondii* FOU]. (518) XP\_017045419 PREDICTED: inactive peptidyl-prolyl cis-trans isomerase shutdown [*Drosophila* (519) PUA87907 peptidyl-prolyl cis-trans isomerase, partial [*Toxoplasma gondii* TgCATBr9]. (520) XP\_017001929 PREDICTED: inactive peptidyl-prolyl cis-trans isomerase shutdown [*Drosophila* (521) XP\_009012598 hypothetical protein HELRODRAFT\_168497 [*Helobdella robusta*]. (522) XP\_008888049 peptidyl-prolyl cis-trans isomerase [*Hammondia hammondi*]. (523) XP\_023297605 inactive peptidyl-prolyl cis-trans isomerase shutdown-like [*Lucilia cuprina*]. (524) XP\_002594856 hypothetical protein BRAFLDRAFT\_86023 [*Branchiostoma floridae*]. (525) XP\_018896035 PREDICTED: inactive peptidyl-prolyl cis-trans isomerase FKBP6-like [*Bemisia t* (526) XP\_004517316 inactive peptidyl-prolyl cis-trans isomerase shutdown [*Ceratitis capitata*]. (527) XP\_017148191 PREDICTED: inactive peptidyl-prolyl cis-trans isomerase shutdown-like [*Drosop* (528) XP\_002412109 FKBP-type peptidyl-prolyl cis-trans isomerase, putative, partial [*Ixodes scap* (529) XP\_014507068 70 kDa peptidyl-prolyl isomerase [*Vigna radiata* var. *radiata*]. (530) XP\_011298074 PREDICTED: inactive peptidyl-prolyl cis-trans isomerase shutdown [*Fopius aris* (531) ESS30489 peptidyl-prolyl cis-trans isomerase [*Toxoplasma gondii* VEG]. (532) EPR59296 peptidyl-prolyl cis-trans isomerase [*Toxoplasma gondii* GT1]. (533) OAJ38225 hypothetical protein BDEG\_22175 [*Batrachochytrium dendrobatidis* JEL423]. (534) XP\_018637740 peptidyl-prolyl cis-trans isomerase [*Toxoplasma gondii* ME49]. (535) KYK63140 peptidyl-prolyl cis-trans isomerase [*Toxoplasma gondii* TgCatPRC2]. (536) CEL73032 TPA: peptidyl-prolyl isomerase, putative [*Toxoplasma gondii* VEG]. (537) AAX51680 dual-family immunophilin 57 kDa [*Toxoplasma gondii*]. (538) AFJ24780 peptidyl prolyl cis trans isomerase FKBP-2, partial [*Schmidtea mediterranea*]. (539) NP\_611837 shutdown [*Drosophila melanogaster*]. (540) XP\_012342118 PREDICTED: inactive peptidyl-prolyl cis-trans isomerase FKBP6 isoform X2 [Api (541) XP\_002082854 uncharacterized protein Dsimw501\_GD25009, isoform A [*Drosophila simulans*]. (542) XP\_002040150 GM15507 [*Drosophila sechellia*]. (543) XP\_021954336 inactive peptidyl-prolyl cis-trans isomerase FKBP6-like [*Folsomia candida*]. (544) XP\_001357527 uncharacterized protein Dpse\_GA18393 [*Drosophila pseudoobscura pseudoobscura*] (545) XP\_002015409 GL11067 [*Drosophila persimilis*]. (546) XP\_017469679 PREDICTED: inactive peptidyl-prolyl cis-trans isomerase shutdown-like [*Rhago* (547) XP\_020810045 inactive peptidyl-prolyl cis-trans isomerase shutdown [*Drosophila serrata*].
