# Supplementary material for: Compression of Large Sets of Sequence Data Reveals Fine Diversification of Functional Profiles in Multigene Families of Proteins: A Study for Peptidyl-Prolyl cis/trans Isomerases (PPIase)
Source: MDPI journal article supplement (doi:10.3390/biom9020059), 2019-02-11
Supplement: s1 [file s1]

```

C                                     *
C                                     * *
C                                     *
C      T h e ><><>< Seq_Gen * * * P R O G R A M (2010)
C
C      This is a Mac version of Datapx.f October-2007
C      Overhaul Mars-22-2010 called Seq_Gen.f
C      ||||||||||||||||||||||||||||||||||||||||||||||||||||||||||||
C+++++||||||||||||||||||||||||||||||||||||||||||||||||||||||||||+C
C                                     * * *
C      Program for reading standard sequence entry produced in the NCBI
C                                     * * *
C      Programmed by Andrzej Galat
C      Copyright (c) Andrzej Galat 28/2/2002
C      * * * * *
C
C      The Seq_Gen.f program is made available under the following
C      conditions and the GNU licence:
C      1) The program shall be used for scientific purpose only,
C      excluding industrial or commercial purpose.
C      2) Proper acknowledgement shall be made to the author of the
C      program in publications resulting from the use of Seq_Gen
C      3) The program shall not be made available to users outside
C      the recipient's laboratory, unless written consent is
C      obtained.
C+++++||||||||||||||||||||||||||||||||||||||||||||||||||||||||||+C
C      This program is distributed in the hope that it will be useful, but
C      WITHOUT ANY WARRANTY; without even the implied warranty of
C      MERCHANTABILITY or FITNESS FOR A PARTICULAR PURPOSE!
C      -----
C      Modified 25/3/2010 ++++++ 10/3/2011 + 23-3-2015
C
C      ||||||||||||||||||||||||||||||||||||||||||||||||||||||||||||
C
C+++++||||||||||||||||||||||||||||||||||||||||||||||||||||||||||+C
C      Subroutines called
C      PROTDB - Read and manage protein data base
C      DEDUCT - Read input file and set up the sequence trimming indexes
C      -----
C      Version (1.21) 4/8/98 *** overhauled 4/01/2001 - Version 2005
C      Program Seq_Gen
C      Dimensioned for 1000 sequences and 2500 codes
C      PARAMETER (IPA=1000, JDD=1500)
C      CHARACTER Decca*1, LINE*80, Ti*80, DATBAS*80
C      Character*6 CONSTER(20)
C      Integer Jbondo(20)
C      Character*25 Codda(IPA), DECOD, CODEX, Work
C      DIMENSION WMM(IPA), CODEX(IPA), IS(IPA), IE(IPA), DECOD(JDD)
C      ///////////////////////////////////
C      First executabel statments
C      -----
C      Jwrite=2
C      Open general dump file
C      Open(Unit=Jwrite,File='apex.out',Status='Unknown')
C=====C
C      * * write the Datapx header and time of execution * *      C
C=====C
C      write(Jwrite,8000)
C      8000 FORMAT(/16X,'Seq Gen program - Version V2.1 - Spring 2002'/

```

```

%          17X,'Programmed by A. Galat - Protein Profile'/)
C          WRITE(JWRITE,8010) ACDATE,ACTIME
C 8010 FORMAT(12X,'Run on:',2X,A,2X,'*+* Started at:',2X,A/)
      KREAD  = 1
      NEX    = 0
C          ///////////////////////////////////
C          Open a series of specific files
      Open(Unit=9,File='apex.num',Status='Unknown')
C          apex.dat contains sequences in the FASTA format (to Clustal)
      Open(Unit=14,File='apex.dat',Status='Unknown')
      Open(Unit=10,File='apex.dot',Status='Unknown')
      Open(Unit=11,File='apex.cod',Status='Unknown')
      Open(Unit=20,File='apex.nam',Status='Unknown')
      Open(Unit=27,File='apex.tor',Status='Unknown')
C          apex.aac contains AACs for each entry from apex.dat
      Open(Unit=17,File='apex.aac',status='unknown')
      Open(Unit=28,File='apex.ppm',status='unknown')
      Open(Unit=16,File='apex.ppp',status='unknown')
      Open(Unit=19,File='apex.com',status='unknown')
      Open(Unit=25,File='apex.ppa',status='unknown')
      Open(Unit=24,File='apex.org',status='unknown')
      OPEN(UNIT=18,FILE='apex.dbb',status='unknown')
C          Duplicate-regularization of the input file
      Open(Unit=3,File='apex.rep',status='unknown')
C          File with tabulated data according to certain format
      Open(Unit=33,File='apex.tab',status='unknown')
C|||||
C          Open main-task file (UNIT=1), status = OLD, READONLY

      READ(KREAD,2) Ti(1:78)
      write(Jwrite,10) Ti(1:78)
      write(3,10) Ti(1:78)
      Write(28,10) Ti(1:77)
      Write(11,10) Ti(1:77)
      Write(10,10) Ti(1:77)
      Write(16,10) Ti(1:77)
      Write(19,10) Ti(1:77)
      Write(25,10) Ti(1:77)
C|||||
C          Creation of possible database (for further elaboration by the user)
C
      Write(18,10) Ti(1:77)
      WRITE(19,12)
12  FORMAT(3X,'Comments and structure of the input file'/)
10  FORMAT(3X,A)
2   FORMAT(1X,A)
      READ(KREAD,2) DATBAS
      write(3,2) DATBAS
      Read(KREAD,*) Jf
C          Decca is one-character entry (blank .OR. P)
C          If it is P full name of organisms is written in
      Read(KREAD,15) Decca, Jdiva
15  Format(A1,I10)
      Write(Jwrite,150) Decca, Jdiva
150 Format(10X,'|||| Chosen-option ', '( ',A1,' ) ',' Cases ',I3/)
      If(Jdiva .gt. 0) Then
      Do K=1,Jdiva
      Read(KREAD,60) CONSTER(K), Jbondo(K)

```

```

60   Format(A6,1X,I5)
    Enddo
    Do J = 1,Jdiva
    If(J .eq. 1) write(Jwrite,70) CONSTER(J), Jbondo(J), Jbondo(J)
    If(J .gt. 1) write(Jwrite,70) CONSTER(J), Jbondo(J), Jbondo(J)-
#    (Jbondo(J-1) + 1)
70   Format(5X,'Constraints-names > ',A6,2X,'Ends at: ',I3,5X,
#       '< Members count > ',I3)
    enddo
    Endif
C   =====
C   Jf - length of the sliding frame
    If(Jf .lt. 5 .OR. Jf .gt. 35) Then
    Write(Jwrite,8100) Jf
8100 format(// 'S T O P !!! * Sliding frame out of range!!!'/)
    goto 1000
    endif
    Write(Jwrite,8020) Jf
8020 Format(/6X,'Sliding frame =',I5/)
C   NCODE - number of chosen codes
    NCODE = 0

C|||||||||||||||||||||||||||||||||||||||||||||||||||||||||||||

400  READ(KREAD,5,ERR=500) LINE
5    FORMAT(A)
    IF(LINE(1:1) .EQ. '!'.OR.LINE(1:1) .eq. '>') WRITE(19,2) LINE
    IF(LINE(1:6) .EQ. 'CONSTR') GOTO 500
    IF(LINE(1:1) .EQ. ' ') THEN
    NCODE = NCODE + 1
    CODEX(NCODE) = LINE(2:26)
    ENDIF
    GOTO 400
C   Make sure that some codes are not repeated
500  NN = 0
    Do 440 J = 1,NCODE
    Work = CODEX(J)
    Jot = J
    Do K = Jot+1,NCODE
    If(Work .EQ. CODEX(K)) Then
    Write(6,670) Work
670  Format(6X,'Attention repeated code :',A)
    goto 440
    Endif
    ENDDO
    NN = NN + 1
    Codda(NN) = Work
440  Continue
    Write(Jwrite,510) NCODE, NN
510  Format(6X,'Attention =',I5,' codes and ',I4,' are unique'/)
    Do J = 1,NCODE
    CODEX(J) = '
    Enddo
    NCODE = NN
    Do J=1,NCODE
    CODEX(J) = Codda(J)
    Write(3,33) CODEX(J)
33   Format(1X,A)

```

```

        Enddo
C      ///////////////////////////////////////////////////
C      Read bundries for some sequences - if used
        NEX = NEX + 1
        Work = CODEX(1)
        Ncc = 1
300    Do K = 1+Ncc,NCODE
        If(CODEX(K) .eq. Work) Write(6,200) K, Work
200    format('At step',I5,2X,'repeated code',2X,A)
        Enddo
        Ncc = Ncc + 1
        Work = CODEX(Ncc)
        write(66,44) Ncc, Work
44    format('555',I10,2X,A)
C      !!!!!!!!!!!!!!!!!!!!!!!!!!!!!!!
        If(Ncc .lt. NCODE) goto 300
C
        write(6,780) NCODE
780    format('NCODE====',I6)
        DO J=1,NCODE
        write(11,17) J, CODEX(J)
17    Format(I3,1X,A)
        Enddo
        If(NEX .GT. IPA) Write(Jwrite,215)
215    Format(/10X,'Warning: There are more than 1000 codes used'/)
        CALL DEDUCT(KREAD,Isi,NCODE,IPA,NEX,CODEX,DECOD,IS,IE)
        If(Isi .eq. 1) goto 1000
        NEX = NEX - 1
        write(6,55) NEX
55    format('Constr',I6)
C      Read protein data-bases
        do j=1,NEX
        write(36,80) IS(j), IE(j), DECOD(j)
80    format('star',2I10,3X,A)
        enddo
C      |||||
600    CALL PROTDB(Jwrite,NCODE,CODEX,DATBAS,NEX,IS,IE,DECOD,WMM,Jf,
        # Jdiva,Decca,CONSTER,Jbondo)
C
1000 write(Jwrite,1999)
1999 FORMAT(/5X,'-> Datapx: ', '((( Job finished )))'/)
        CLOSE(KREAD)
        CLOSE(Jwrite)
        CLOSE(9)
        Close(10)
        Close(11)
        Close(14)
        Close(15)
        Close(33)
        Write(18,11)
11    Format('ENDENDENDENDENDENDENDENDENDENDENDENDENDENDENDEND')
        Close(18)
        STOP
        END
C=====C
C      Read protein data base and create the ordered data base      C
C      according to the structure given in the input file            C
C      Author: A. Galat, Version 1.0 * Dec 1990                      C

```

```

C      Subroutines called:
C      HYDROP - hydrophobicity plot and HI calculation
C      MASSPR - nominal mass of protein
C      TRANSS - transformation of sequence into integers
C      PICAL - pI calculation (see called routines)
C=====C
      SUBROUTINE PROTDB(Jw,NCODE,VCODE,DATBAS,NX,IS,IE,DECOD,WMM,Jsf,
#      Jdiva,Decca,CONSTER,Jbondo)
C      |||||
PARAMETER (NSQ=38000)
C      Dimensioned for Ixf = 1000 sequences for being aligned
C      Dimensioned for Itj = 4500 AA-long chain used in the alignment
C      and the length of input sequence cannot be longer than NSQ
      Parameter (Ixf=1000,Itj=4500)
C|||||
      INTEGER Ltot(Ixf), ISEQ(NSQ), JKL(Ixf), IS(NX), IE(NX)
      CHARACTER*1 TER, SER, QSEQ(NSQ), TSEQ(NSQ)
      CHARACTER*25 Negat(700), Codmax(6), Codx(700), CODET
      Character*50 Tutu
      Character*25 Gigat(700), Mamez, Namex, Curttt, LINEF, VCODE, DECOD
      CHARACTER*100 Curyyy, LINEMX, CURTIT, PROTCO
      CHARACTER*80 TITLE(Ixf), DATBAS
      CHARACTER*1 Decca, Unders, ARRAY(Itj,Ixf)
      Character*6 CONSTER(20)
      Character*15 Lott(Ixf)
      Integer Lat(Ixf), Lyt(Ixf), Jbondo(20)
      DIMENSION PIST(Ixf),HIST(Ixf)
      Dimension VCODE(NCODE),DECOD(1500),CODET(Ixf)
      Real Hff, PII(Ixf), HII(Ixf), WMM(Ixf)
      Character*3 Rota(11)
C234567890123456789012345678901234567890123456789012345678901234567890
      Data Rota/'#Or','#DO','#St','#Re','#CL','#SA','#BP','#BM','#CP',
#      '#EN','#EoR'/
      Logical Trimmo
C      ///////////////////////////////////
C      First executable statment
C      =====
      Jwrite = Jw
      Jcod = 0
      Lmax = 0
      Lmin = 100000

      If(NCODE .gt. 1000) Then
        Write(2,6000)
6000 Format(10X,'Too large number of sequences for alignment'/
"      10X,'Change dimensions of some matrices !!!!!!!!!'/)
      Goto 9999
      Endif
      Trimmo = .false.
      PIa = 0.0
      HIa = 0.0
      Pim = 0.0
      Pam = 100.0
      Him = 0.0
      Ham = 100.0
      LREAD = 8
      JRR = 0
      Neg = 0

```

```

C      |||||||||||||||||||||||||||||||||||||||||||||||||||||||||||
C      Pre-set three output matrices according to dimension NCODE
      DO J=1,NCODE
        TITLE(J) = '
        CODET(J) = '
        JKL(J)    = 1
        PII(J)    = 0.0
        HII(J)    = 0.0
        WMM(J)    = 0.0
        Lat(J)    = 0
        Lyt(J)    = 0
        Lott(J)   = '
        DO I = 1,2
          ARRAY(I,J) = ' '
        ENDDO
      ENDDO

      Jhot = 0
      Do K=1,Ncode
        Gigat(K) = '
      Enddo
      write(Jwrite,33) NCODE
      write(6,33) NCODE
33     FORMAT(5X,' Number of used codes ',I5/)
      write(Jwrite,34) DATBAS
34     FORMAT(5X,' Database used ',2X,A/)

C      |||||||||||||||||||||||||||||||||||||||||||||||||||||||||||
C      Open current data-base

      OPEN(UNIT=LREAD,NAME=DATBAS,STATUS='OLD',FORM='FORMATTED')
C      Read two records (Code and title) or comments
3      FORMAT(A)
1      READ(LREAD,3,ERR=100) LINEMX
      IF(LINEMX .EQ. '!') GOTO 1
      DO J=1,NCODE
        KAPUT = J
        IF(LINEMX(4:24) .EQ. VCODE(J)) GOTO 500
      ENDDO
      GOTO 1
500    CONTINUE
      KO      = 0
      PROTCO = LINEMX(1:80)
      READ(LREAD,3,ERR=100) LINEMX
      CURTIT = LINEMX(1:80)
C      Read sequence (multiple records)
5      READ(LREAD,3,ERR=100) LINEMX
      DO J = 70,1,-1
        TER = LINEMX(J:J)
        IF(TER .NE. ' ') THEN
          KL = J
          GOTO 9
        ENDIF
      ENDDO
C      Set-up the sequence vector
9      DO K      = 1,KL
        TER      = LINEMX(K:K)
        SER      = TER

```

```

TSEQ(K+KO) = TER
ENDDO
KO = KO + KL
C   If end-sequence record was reached
   IF(SER .EQ. '*' .OR. SER .EQ. '/') GOTO 12
C   Read next sequence record
   GOTO 5
12  KOUNT = KO - 1
   write(36,551) KOUNT, PROTCO
551 format('>>>>>>>>>>',I10,2X,A)
   IP = 1
   IH = KOUNT
   Do Kj = 1,KOUNT
C   |||||||||||||||||||||||||||||||||||||||
C   Catch all sequences with X-entry

   If(TSEQ(Kj) .eq. 'X') Then
     Jcod = Jcod + 1
     Codx(Jcod) = PROTCO(3:27)
   Endif
   QSEQ(Kj) = TSEQ(Kj)
   Enddo

C   Calculate parameters of total sequence
C   |||||||||||||||||||||||||||||||||||||||

   Ltot(KAPUT) = KOUNT
   Call PICAL(IH,PI,QSEQ)
   PII(KAPUT) = PI
   Call TRANSS(IH,ISEQ,QSEQ)
   Call HYDROP(IH,ISEQ,Hff,0,Jsf)
   HII(KAPUT) = Hff
   Call MASSPR(IH,ISEQ,WM,0)
   WMM(KAPUT) = WM
C   Store the captured sequence information
   TITLE(KAPUT) = CURTIT
   CODET(KAPUT) = PROTCO(1:25)
C   |||||||||||||||||||||||||||||||||||||||
C   If trimming of sequence was requested

   DO J=1,NX
     IF(PROTCO(4:28) .EQ. DECOD(J)) THEN
       Trimmo = .true.
       IP = IS(J)
       IH = IE(J)
       LINEF = DECOD(J)
       WRITE(19,90) LINEF(1:10), KOUNT, IP, IH
       WRITE(36,90) LINEF(1:10), KOUNT, IP, IH
90  FORMAT(1X,'Sequence encoded',1X,A,1X,'length',I6,
"         2X,'trimmed',I6,' - ',I7/)
       Lott(KAPUT) = LINEF(1:15)
       Lat(KAPUT) = IP
       Lyt(KAPUT) = IH
     ENDIF
   ENDDO
C   If No trimming write apex.num
   If(.NOT.Trimmo) Then
     Lott(KAPUT) = PROTCO(4:18)

```

```

Lat(KAPUT) = IP
Lyt(KAPUT) = IH
Endif

C|||||
C    Write temporary file #80

    JRR = JRR + 1
    write(80,*) KAPUT, IH-IP+1
    write(80,80) (TSEQ(J),J=IP,IH)
80   format(70A1)
    Trimmo = .false.
    GOTO 1
100  REWIND LREAD
    CLOSE(LREAD)
    REWIND(80)
C    |||||
C|||||
    Do L=1,JRR
    Read(80,*) L1, L2
    JKL(L1) = L2
    READ(80,80) (TSEQ(N),N=1,L2)
    Do M=1,L2
    ARRAY(M,L1) = TSEQ(M)
    ENDDO
    ENDDO
    KM = 1

C
C    Final arrangement of sequences and their parameters
C    This is the final looping through the storage area with KAPUT
C
300  Curttt = CODET(KM)
    IG = JKL(KM)
c    write(6,633) KM, IG

633  format(2I6)
    DO Jk = 1,IG
    TSEQ(Jk) = ARRAY(Jk,KM)
    Enddo

C    ::::::::::::::::::::

    Call PICAL(IG,PI,TSEQ)
c    write(6,634) IG,PI
634  format(I7,2X,F10.5)
    Call TRANSS(IG,ISEQ,TSEQ)
    Call HYDROP(IG,ISEQ,HI,1,Jsf)
    Call MASSPR(IG,ISEQ,WM,1)

C    !!!!!!!!!!!!!!!!!!!!!!!

    PIa = PIa + PI
    HIa = HIa + HI

    If(Lmax .lt. IG) Then
    Lmax = IG
    Codmax(1) = CODET(KM)
    Endif

```



```

C      Catch all negative-length entries after Corrto5

      If(IG .lt. 0) Then
      Neg = Neg + 1
      Negat(Neg) = CODET(KM)
      Endif

C      If(IG .lt. Lmin) Then
      Lmin = IG
      Codmax(2) = CODET(KM)
      endif

C      ||||||||||||||||||
      If(Pim .lt. PI) Then
      Pim = PI
      Codmax(3) = CODET(KM)
      Endif
      If(Pam .gt. PI) Then
      Pam = PI
      Codmax(4) = CODET(KM)
      Endif
      If(Him .lt. HI) Then
      Him = HI
      Codmax(5) = CODET(KM)
      endif
      If(Ham .gt. HI) Then
      Ham = HI
      Codmax(6) = CODET(KM)
      Endif

C      //////////////////////////////////////
      Write(24,232)
      LINEMX = Title(KM)
      Tutu = '
      Do L = 1, 80
      Ser = LINEMX(L:L)
      If(Ser .eq. '[') Then
      Do M = 80,1,-1
      If(LINEMX(M:M) .ne. ' ') Then
      Mad = M
      Goto 72
      Endif
      Enddo

72      Tutu = LINEMX(L:MAD)
      MM = MAD-L+1
      Goto 75
      Endif
      Enddo

75      Write(24,235) KM, Curttt(4:15), Ltot(KM), Lat(KM), Lyt(KM), IG,
#          Tutu(1:MM)
235      Format(I3,1X,A,1X,I5,'AAs',1X,'|',I4,'-',I4,'/Alg =',I4,
#          'AA ||',A)
      Write(33,233)
233      Format(114('-',))
232      Format(80('-',))
      Write(33,234) KM, Curttt(4:15), Ltot(KM), Lat(KM), Lyt(KM), IG,
"      PI,PII(KM),HI,HII(KM),0.001*WM,0.001*WMM(KM),TITLE(KM)

```

```

C      Keep the record of whatis in the parantheses
      PIST(KM) = PII(KM)
      HIST(KM) = HII(KM)
C      Keep it for final step

      Write(25,64) KM, TITLE(KM)
      Write(25,66) PI, HI, WM, Curttt(4:15), Lat(KM), Lyt(KM)
C
234  Format(I3,1X,A,1X,I5,'AAs',1X,'|',I4,'-',I4,'/Alg =',I4,'AA ||',
#1X,'pI',F4.1,1X,'( ',F4.1,') ',', ' ||',1X,'HI',1X,F5.1,1X,'( ',F5.1,') ',
#1X,'||',', ' Mass kDa',F5.1,1X,'( ',F6.1,') ',', ' ||'/A)
C
C      WARNING for border overflow - upperrange of the sequence
C
      If(Ltot(KM)-Lyt(KM) .lt. 0) Then
      Write(Jwrite,191) Lyt(KM), Ltot(KM)
      Write(55,55) Curttt(4:15),Lat(KM), Ltot(KM)
55  format(A,10X,I4,5X,I5)
      endif

191  Format('!!!!!! Attention - chosen region out of length',2I6/)
      write(Jwrite,19) KM,IG,Ltot(KM),Lat(KM),Lyt(KM),Curttt(4:15),
"      PI,PII(KM),HI,HII(KM),0.001*WM,WMM(KM),TITLE(KM)
      write(21,210) PI, HI
      write(23,210) PI, WM
210  format(2(2X,F10.3))
C|||||
C      Filling up possible 'USER' database
C|||||
C      Filling up putative database for further 'USER' elaboration
      Write(18,11)
11  Format('@')
      Write(18,14)
14  Format('%')
      Write(18,40) CODET(KM)
      Write(18,44) TITLE(KM)
C|||||
40  Format('>',2X,A25)
44  Format('>',2X,A)
C
      Write(18,45) KM, WMM(KM), PII(KM), HII(KM)
45  Format('#Dt',2X,I6,2X,F12.3,3X,F7.3,3X,F8.4)
      Write(18,46) Rota(1),Rota(2),Rota(3),Rota(4),Rota(5),Rota(4),
# Rota(6),Rota(4),Rota(7),Rota(4),Rota(8),Rota(4),Rota(9),
# Rota(4),Rota(10),Rota(4),Rota(11)
46  Format(16(A3/),A3)
C|||||
C|||||
C|||||
C      ----- 12/6/2008 -----
19  Format(I3,'#',I4,'( ',I5,'&',I5,I5,') ',1X,A,F4.1,1X,
"'( ',F4.1,') ',1X,F5.1,1X,'( ',F5.1,') ',1X,F5.1,1X,'( ',F9.1,') '/A/)
      WRITE(12,20) Curttt(1:21)
      CURTIT = TITLE(KM)
      WRITE(12,20) CURTIT(1:78)
C
      Jhot = Jhot + 1
      Unders = '_'

```

```

If (Decca .eq. 'P') Then
Jot = 0
Do J=1,80,1
If (CURTIT(J:J) .eq. '[') Then
Jot = J
Lom = 11
Do K = Jot+1,Jot+21
If (CURTIT(K:K) .eq. ']') Then
Lom = K
GoTo 2240
Endif
Enddo

```

```

2240 Mamez = CURTIT(Jot+1:Lom-1)
Namex = Mamez
Do N = 1,20
If (Namex(N:N) .eq. ' ') Then
Namex = Mamez(1:N-1)//'_'//Mamez(N+1:20)
GOTO 7700
Endif
Enddo
7700 Endif
Enddo

```

C

```

Gigat(Jhot) = Namex
If (Jdiva .gt. 0) Then

Do KK=1,Jdiva
If (Jhot .le. Jbondo(KK)) Then
Mamez = Namex
Do J=1,25
If (Mamez(J:J) .eq. ' ') Then
Koq = J-1
goto 5775
endif
enddo

```

```

5775 Namex = Mamez(1:Koq)//CONSTER(KK)
Gigat(Jhot) = Namex
goto 7880
endif
Enddo
Endif
Else
Do KK=1,Jdiva
If (Jhot .le. Jbondo(KK)) Then
Mamez = Codet(KM)
DO Lv = 15,1,-1
If (Mamez(Lv:Lv) .ne. ' ') Then
Lov = Lv
Goto 5730
Endif
enddo

```

```

5730 Namex = Mamez(3:Lov)//Unders//CONSTER(KK)
Write(66,662) Namex

```

```

662 Format(1X,A)
Goto 7880
Endif

```

```

        Enddo
        Endif

7880 Write(27,2020) Namex, CURTIT(1:55)
2020 Format('> ',A,4X,A)
C
    WRITE(14,202) Curttt(1:21), CURTIT(1:80)
    Curyyy = CURTIT(3:80)
    Write(20,225) KM, Curttt(3:20), Curyyy
225  format('(',I3,')',1X,A15,2X,A)
    write(22,215) KM, Curttt(3:21), Namex, PI, HI
215  format(I3,2X,A,3X,2X,A,1X,F5.2,3X,F7.2)
202  format(A,4X,A)
    Write(10,24)
24   Format('@')
    WRITE(10,20) Curttt(1:21)
    WRITE(10,20) CURTIT(1:78)
20   FORMAT(A)
25   FORMAT(70A1)
    write(12,25) (TSEQ(Jk),Jk=1,IG)
    write(27,25) (TSEQ(Jk),Jk=1,IG)
    write(14,25) (TSEQ(Jk),Jk=1,IG)
    Write(28,21) KM,PI,HI,WM,Curttt(4:18),CURTIT(3:80)
21   Format(I4,2X,F5.2,2X,F5.1,2X,F8.1,2X,A,2X,A)
    KM = KM + 1
c    write(36,5100) KM
c 5100 format('Making code',I5)

C||||||||||||||||||||||||||||||||||||||||||||||||||||||||
C    Go looping againuntil the endlist is reached (Codes)
C||||||||||||||||||||||||||||||||||||||||||||||||||||||||

    IF(KM .LE. NCODE) GOTO 300

C
    PIa = PIa/Float(NCODE)
    HIa = HIa/Float(NCODE)
    Write(2,125) PIa, HIa, Pim, Codmax(3), Pam, Codmax(4),
#    Him, Codmax(5), Ham, Codmax(6), Lmin, Codmax(2),
#    Lmax, Codmax(1)
    Write(28,125) PIa, HIa, Pim, Codmax(3), Pam, Codmax(4),
#    Him, Codmax(5), Ham, Codmax(6), Lmin, Codmax(2),
#    Lmax, Codmax(1)

125  Format(3X,'Average pI =',F5.2,3X,'Average HI =',F5.2/
"    3X,'Maximal pI =',F5.2,3X,A/
"    3X,'Minimal pI =',F5.2,3X,A/
"    3X,'Maximal HI =',F5.2,3X,A/
"    3X,'Minimal HI =',F5.2,3X,A/
#    3X,'Minim-Code =',I5,2X,A/
#    3X,'Maxim-Code =',I5,2X,A/)
    Do J=1,Neg
    Write(6,630) J, Negat(J)
630  format(2X,'Warning >>>> Sequence with negative length',I5,2X,A)
    Enddo
    Do J=1,Jcod
    Write(6,620) J, Codx(J)
620  Format(2X,'Warning >>>>> Sequence has X-residue',I5,2X,A)

```

```

        Endddo
C      ||||||||||||||||||||||||||||||||||||||||||||||||||||
C      See if there are similar parameters pI - mass - HI
C|||||||
        Pip = PII(1)
        Hip = HII(1)
        Wip = WMM(1)
        I1 = 1
        DO j=2,NCODE
        If(Pip .eq. PII(j) .and. Hip .eq. HII(j) .and. Wip .eq. WMM(j))
        "      write(2,3000) I1,j
3000 format(6X,'Sequences',1X,2I5,1X,'have similar data')
        Pip = PII(j)
        Hip = HII(j)
        Wip = WMM(j)
        I1 = j
        Endddo
C      ||||||||||||||||||||||||||||
C      =====
C      Create an output file 16
C      =====
        If(Decca .eq. 'P') Then
        Namex = Gigat(1)
        Loy = 1
540  Do K=1+Loy,Ncode
        If(Namex .eq. Gigat(K)) Write(6,7500) Loy, K, Gigat(K)
7500 format('Sequences',2I5,2X,'Have similar codes',A)
        Endddo
        Loy = Loy + 1
        Namex = Gigat(Loy)
        If(Loy .lt. Ncode) goto 540
        Endif
C
        DO J = 1,NCODE
        Curttt = CODET(J)
        Write(16,64) J, TITLE(J)
64  Format(I4,1X,A)
        Write(16,66) PII(J), HII(J), WMM(J), Curttt(4:15), Lat(J), Lyt(J)
        Write(9,28) Lott(J), Lat(J), Lyt(J)
28  Format(A,2X,2I10)
        ENDDO
66  Format(3X,F7.2,3X,F5.2,3X,F10.2,2X,A,2(2X,I5))
        Write(Jw,545)
        write(28,545)
545  Format(/2X,' Data-points ',1X,
# 'Average || pI & sd    ||    HI & sd ||')
        F1 = 0.0
        H1 = 0.0
        Do L = 1,Ncode
        F1 = F1 + PIST(L)
        H1 = H1 + HIST(L)
        Endddo
C      Mean-values
        If(Ncode .gt. 0) Then
        F1 = F1/Float(Ncode)
        H1 = H1/Float(Ncode)
C      SD
        F2 = 0.0

```

```

H2 = 0.0
write(67,753) F1, H1
753 format('Average',2F10.3)
Do L = 1,Ncode
F22 = PIST(L) - F1
H22 = HIST(L) - H1
write(67,677) F22, PIST(L), H22, HIST(L)
677 format(4F10.3)
F22 = F22**2
H22 = H22**2
F2 = F2 + F22
H2 = H2 + H22
Enddo
F2 = Sqrt(F2/Float(Ncode))
H2 = Sqrt(H2/Float(Ncode))
write(67,653) F2, H2
653 format('Final SD',2F10.5)
C Skewness-AG
Kol0 = 0
Kol1 = 0
Kol2 = 0
Kol3 = 0
Kol4 = 0
Kol5 = 0
Do L=1,Ncode
F3 = PIST(L) - F1
H3 = HIST(L) - H1
write(67,622) F3, H3
622 format('H3333',2F10.5)
If(F3 .eq. 0.0) Kol0 = Kol0 + 1
If(F3 .lt. 0.0) Kol1 = Kol1 + 1
If(F3 .gt. 0.0) Kol2 = Kol2 + 1
If(H3 .eq. 0.0) Kol5 = Kol5 + 1
If(H3 .lt. 0.0) Kol3 = Kol3 + 1
If(H3 .gt. 0.0) Kol4 = Kol4 + 1
Enddo
write(67,679) Kol0, Kol1, Kol2, Kol5, Kol3, Kol4
679 format(6I10)
F4 = 0.0
H4 = 0.0
F5 = 0.0
H5 = 0.0
Nske = Ncode - Kol0
Nkur = Ncode - Kol5
write(67,543)
543 Format('p-I-')
Do L=1,Nske
AAA = (PIST(L)-F1)**3
F4 = F4 + AAA
BBB = (PIST(L)-F1)**4
F5 = F5 + BBB
Write(67,388) PIST(L), F1, AAA, F4, BBB, F5
Enddo
Write(67,328)
328 format('HIHI')
Do L=1,Nkur
AAA = (HIST(L)-H1)**3
H4 = H4 + AAA

```

```

      BBB = (HIST(L)-H1)**4
      H5 = H5 + BBB
      write(67,388) AAA, H4, BBB, H5
388  format(6F10.3)
      Enddo

      gif = F4/Float(Nske-1)
      hif = H4/Float(Nkur-1)
      gaf = F5/Float(Nske-1)
      haf = H5/Float(Nkur-1)
      giff = gif/F2**3
      hiff = hif/H2**3
      gaff = gaf/F2**4
      haff = haf/H2**4
      Endif

      Write(Jw,885) Ncode, F1, F2, H1, H2
      write(28,885) Ncode, F1, F2, H1, H2
885  Format(7X,I5,13X,2F5.1,' ||||',2F6.1/)
      Write(Jw,880) Kol1, Kol2, Kol3, Kol4, giff, gaff, hiff, haff
      Write(28,880) Kol1, Kol2, Kol3, Kol4, giff, gaff, hiff, haff
880  Format(3X,'pIs < (mean pI) ',I3,2X,'///',2X,'pIs > (mean pI) ',
# I3,' || '//3X,'HIs < (mean HI) ',I3,2X,'///',2X,
# 'HIs > (mean HI) ',I3,' || '/'
#/3X,'Skewness /// Kurtosis : pI',2F7.3,' | '/'
#/3X,'Skewness /// Kurtosis : HI',2F7.3,' | '/')

C
CCC  Insert July-2014
C
9999 RETURN
      END
C  |||||
C+++++
C Subroutine for deduction of input data in the following form C
C Character *** Integer *** Integer introduced as LINE(1:80) C
C This format is necessary if free space in LINE are used as a C
C principal attribute for finding the lower-upper limits for C
C procesing given sets of sequences C
C Author A. Galat 6/8/98 C
C+++++
C  Version 1.1 6/8/98
      SUBROUTINE DEDUCT(KREAD,Isi,NCODE,IPA,NEX,CODEX,DECOD,IS,IE)
      Parameter (IDY=1500)
      CHARACTER*80 LINE, Terpy(IDY)
      CHARACTER*25 TEMPR(IDY), DECOD(IDY), CODEX(IPA), COP, KOF
      INTEGER IS(IPA), IE(IPA), IDD
C  //////////////////////////////////////
      Lcon = 1
      Isi = 0
3000 READ(KREAD,10,End=4000,ERR=4000) LINE
      IF(Line(1:1) .eq. '!') goto 3000
      Terpy(Lcon) = LINE
      Lcon = Lcon + 1
      goto 3000

4000 Write(6,530) Lcon
530  format('Lcon=',I7)
      LLL = 1

```

```

        LRR = 0
450  COP = CODEX(LLL)

        Do J = 1,Lcon
        Line = Terpy(J)
        KOF = Line(1:20)
        IF(COP(1:20) .eq. KOF) Then
        write(96,66) Line
66  Format(A)
        LRR = LRR + 1
        goto 4500
        Endif
        enddo

4500 LLL = LLL + 1
        IF(LLL .gt. NCODE) goto 5500
        Goto 450

C
5500 Rewind(96)
        JR = 0
1000 READ(96,10,END=2000,ERR=2000) LINE
10  FORMAT(A)
        DECOD(NEX) = ' '
        COP = ' '
        J0 = 0
        KN = 0
        IRET = 0
C|||||
C
C      There is possibility to put the sign !!!!!!!!!!!!!!!!!!!!!!!
C
        If(LINE(1:1) .eq. '!') goto 1000
500  J0 = J0 + 1
        IF(LINE(J0:J0) .EQ. ' ') GOTO 500
C      Find the begining and ending 'WORD'
        IF(LINE(J0:J0) .NE. ' ') THEN
        K1 = J0
        COP(1:1) = LINE(K1:K1)
        DO I = K1+1,80
        KN = KN + 1
        IF(LINE(I:I) .EQ. ' ') GOTO 600
        COP(1:KN+1) = COP(1:KN)//LINE(I:I)
        KOP = I
        ENDDO
        ENDIF
C      =====
600  KOF = DECOD(NEX)
        DECOD(NEX) = COP(1:KN)//KOF(KN+1:25)
        JR = JR + 1
        TEMPR(JR) = COP(1:KN)
C      See if repeated CODE was used
        If(JR .gt. 1) Then
        Do L1=1,JR-1
        IF(COP(1:KN) .eq. TEMPR(L1)) Then
        Write(6,60) L1, COP(1:KN)
60  format('>>>>>>>> Code repeated',2X,I5,3X,A)
        goto 70
        endif

```



```

        Endddo
        Write(3,10) LINE
        Endif
C
70      Do KL=1,NCODE
        If(DECOD(NEX) .eq. CODEX(KL)) goto 650
        endddo
        GOTO 1000
650     J0 = KOP
700     J0 = J0 + 1
        IF(LINE(J0:J0) .EQ. ' ') GOTO 700
        IF(LINE(J0:J0) .NE. ' ') THEN
            K1 = J0
            KOP = K1
            DO I = K1 + 1,80
                IF(LINE(I:I) .EQ. ' ') GOTO 800
            KOP = I
            ENDDO
        ENDIF
C      Convert character data into an integer
800     IP = KOP - K1
C      write(6,*) IP
        IF(IP .EQ. 0) WRITE(15,51) LINE(K1:KOP)
        IF(IP .EQ. 1) WRITE(15,52) LINE(K1:KOP)
        IF(IP .EQ. 2) WRITE(15,53) LINE(K1:KOP)
        IF(IP .EQ. 3) WRITE(15,54) LINE(K1:KOP)
        IF(IP .EQ. 4) WRITE(15,55) LINE(K1:KOP)
51      FORMAT(A1)
52      FORMAT(A2)
53      FORMAT(A3)
54      FORMAT(A4)
55      format(A5)
C      REWIND(15)
        backspace(15)
        READ(15,*) IDD
C      CLOSE(15,DISPOSE='DELETE')
        IF(IRET .EQ. 0) IS(NEX) = IDD
        IF(IRET .EQ. 1) IE(NEX) = IDD
        IRET = IRET + 1
        J0 = KOP
        IF(IRET .LE. 1) GOTO 700
        NEX = NEX + 1
        GOTO 1000
2000    RETURN
        END
C=====C
C      Translate sequence into an array of integers (ISEQ)      C
C      Author: A. Galat (August, 2nd, 1991)                    C
C=====C
        SUBROUTINE TRANSS(KOUNT,ISEQ,TSEQ)
C      Character data sequence processing codes (one-letter code)
        Parameter(NSQ=38000)
        CHARACTER*1 AMINOS(22)
        INTEGER ISEQ(NSQ)
        CHARACTER*1 TSEQ(NSQ)
        DATA AMINOS/'A','R','N','D','C','Q','E','G','H','I','L','K',
+                'M','F','P','S','T','W','Y','V','/','X'/
        DO J = 1,KOUNT

```

```

DO I = 1,22
IF(TSEQ(J) .EQ. AMINOS(I)) ISEQ(J) = I
ENDDO
ENDDO
RETURN
END

C=====C
C      Calculation of protein hydrophobicity from its sequence      C
C      Author: A. Galat (October 1988)                               C
C=====C
      SUBROUTINE HYDROP(KOUNT,ISEQ,HI,Ir,Jsf)
C      For extensive review of hydrophobicity SCALES see ref:
C      Cornette, J.L., Cease, K.B., Margalit, H., Spouge, J.L.,
C      Berzofsky, J.A. & DeLisi, Ch., J. Mol. Biol. 195:659-685:1987
      Parameter(NSQ=38000)
      REAL SCALE(22)
C      Hydrophobicity scale of Kyte and Doolittle (J. Kyte and
C      R.F. Doolittle, J. Mol. Biol. 157:105-132:1982)
      DATA (SCALE(J),J=1,22)/1.8,-4.5,-3.5,-3.5,2.5,-3.5,-3.5,-.4,
# -3.2,4.5,3.8,-3.9,1.9,2.8,-1.6,-.8,-.7,-.9,-1.3,4.2,.0,.0/
      Integer ISEQ(KOUNT)
      Dimension VAR(NSQ), VAL(NSQ)
C      First executable statement (moving window = middle)
      Fic = Float(Jsf)
      MIDDLE = Jsf/2.0 + 1
      ISTART = MIDDLE
      IEND = KOUNT - MIDDLE + 1
C      Set-up hydrophobicity values vector VAR
      DO 2 I = 1,KOUNT
      TEMP = SCALE(ISEQ(I))
      VAR(I) = TEMP
2      CONTINUE
C      Calculate averaged hydrophobicity value for the central residue
      DO 5 I = ISTART,IEND
      RE = 0.0
      DO 4 J = 1,Jsf
      RE = RE + VAR(I-MIDDLE+J)
4      CONTINUE
      VAL(I) = RE/Fic
5      CONTINUE
C      Calculate the percentage of hydrophobic segments (Hi)
      IL2 = 0
      DO J = ISTART,IEND
      IF(VAL(J) .GE. 0.0) IL2 = IL2 + 1
      ENDDO
      IF(KOUNT .GT. 0) HI = FLOAT(IL2)*100.0/FLOAT(KOUNT)
      RETURN
      END

C-----C
C      Calculate mass and composition in % of amino acids C
C      Author A. Galat - October 1988                               C
C-----C
      SUBROUTINE MASSPR(KOUNT,ISEQ,WM,Ir)
      Parameter(NSQ=38000)
      INTEGER ISEQ(NSQ), IPN(20)
      REAL PN(20)
C      Amino acid molecular mass - mass of water (for peptide bond formation)
      REAL AMIWEI(21)

```

```

DATA AMIWEI/
" 71.07884, 156.18764, 114.10392, 115.08863, 103.14484, 128.13081,
" 129.11552, 57.05196, 137.14120, 113.15948, 113.15948, 128.17416,
" 131.19861, 147.17661, 97.11672, 87.07824, 101.10512, 186.21327,
" 163.17601, 99.13260, 18.01528/
Character*4 AMINOT(21)
DATA AMINOT
#      /'Ala-', 'Arg-', 'Asn-', 'Asp-', 'Cys-', 'Gln-', 'Glu-', 'Gly-',
#      'His-', 'Ile-', 'Leu-', 'Lys-', 'Met-', 'Phe-', 'Pro-', 'Ser-',
#      'Thr-', 'Trp-', 'Tyr-', 'Val-', 'Ace-'/
C|||||
WM = 0.0
DO J = 1,20
IPN(J) = 0
ENDDO
DO 2 J2 = 1,KOUNT
DO 1 J1 = 1,20
IF(ISEQ(J2) .EQ. J1) THEN
WM = WM + AMIWEI(J1)
IPN(J1) = IPN(J1) + 1
GOTO 2
ENDIF
1 CONTINUE
2 CONTINUE
WM = WM + AMIWEI(21)
If(Ir .eq. 0) goto 99
DO J = 1,20
PN(J) = 100.*FLOAT(IPN(J))/FLOAT(KOUNT)
ENDDO
C Forming an external bucket with AAC of each entry
Write(17,90) (PN(J),J=1,20)
90 format(10(F6.3,1X))
99 RETURN
END
C-----C
C A Fortran-77 program to calculate pI from sequence C
C See S. Skoog and A Wichman - Trends in Analytical C
C Chemistry Vol. 5, pp. 82-83, 1986 C
C Author: A. Galat, July 1995 C
C-----C
SUBROUTINE PICAL(ITD,PIC,TSEQ)
Parameter(NSQ=38000)
EXTERNAL FUNC
REAL MINIF
Real zbrent
CHARACTER*1 TSEQ(NSQ)
CHARACTER*1 AMINOS(22)
COMMON IC,ID,IE,IH,IK,IR,IY, PI(9)
DIMENSION CTERM(20), CNTERM(20)
C R K Y C H D E NT CT
DATA PI/12.5,10.5,10.1,8.3,6.0,3.9,4.3,0.0,0.0/
DATA CTERM/2.4,2.2,2.1,2.1,1.7,2.2,2.2,2.4,1.8,2.3,
" 2.3,2.2,2.1,2.2,2.0,2.2,2.1,2.4,2.2,2.3/
DATA CNTERM/9.9,9.0,8.8,9.8,10.8,9.1,9.7,9.8,9.2,9.8,
x 9.7,9.0,9.3,9.2,10.6,9.2,9.1,9.4,9.1,9.7/
DATA AMINOS/'A','R','N','D','C','Q','E','G','H','I','L','K',
+ 'M','F','P','S','T','W','Y','V','Z','X'/
C|||||

```

```

C      Preset starting parameters
      If(ITD .eq. 0) goto 99
      KOUNT = ITD
      KL   = 0
      KM   = 0
      PH1  = 1.0
      PH2  = 14.0
C      Calculate the integer number of charged AA
      IR = 0
      IK = 0
      IH = 0
      IC = 0
      ID = 0
      IE = 0
      IY = 0
      DO J = 1,KOUNT
      IF(TSEQ(J) .EQ. 'R') IR = IR + 1
      IF(TSEQ(J) .EQ. 'K') IK = IK + 1
      IF(TSEQ(J) .EQ. 'H') IH = IH + 1
      IF(TSEQ(J) .EQ. 'C') IC = IC + 1
      IF(TSEQ(J) .EQ. 'D') ID = ID + 1
      IF(TSEQ(J) .EQ. 'E') IE = IE + 1
      IF(TSEQ(J) .EQ. 'Y') IY = IY + 1
      ENDDO
C      Find the N- and C-terminal AA
      N9 = 0
      K9 = 0
      DO J = 1,20
      IF(TSEQ(J) .EQ. AMINOS(J)) N9 = J
      IF(TSEQ(KOUNT) .EQ. AMINOS(J)) K9 = J
      ENDDO
      PI(8) = CINTERM(N9)
      PI(9) = CTERM(K9)
C      Decison made search for pI
c      PIC = MINIF(FUNC,PH1,PH2,XACC,MAXEL)
c      PIC = rtsec(func,PH1,PH2,xacc,MAXEL)
      PIC = zbrent(FUNC,PH1,PH2,XACC,MAXEL)
      99 RETURN
      END
C-----C
C      Find charge on the protein      C
C-----C
      FUNCTION FUNC(PH)
C
      COMMON IC,ID,IE,IH,IK,IR,IY,PI(9)
      SUM = 0.0
      SUM = SUM - ID*PNCHARGE(6,PH,PI)
      SUM = SUM - IE*PNCHARGE(7,PH,PI)
      SUM = SUM - IC*PNCHARGE(4,PH,PI)
      SUM = SUM - IY*PNCHARGE(3,PH,PI)
      SUM = SUM + IH*PCHARGE(5,PH,PI)
      SUM = SUM + IK*PCHARGE(2,PH,PI)
      SUM = SUM + IR*PCHARGE(1,PH,PI)
      TEM = PCHARGE(8,PH,PI)
      SUM = SUM + TEM
      TEM = PNCHARGE(9,PH,PI)
      SUM = SUM - TEM
      FUNC = SUM

```

```

RETURN
END
FUNCTION PCHARGE(N,PH,PI)
DIMENSION PI(*)
ALFA = EXP(2.3026*(PH-PI(N)))
PCHARGE = 1.0/(1.0 + ALFA)
RETURN
END
FUNCTION PNCHARGE(N,PH,PI)
DIMENSION PI(*)
ALFA = EXP(2.3026*(PH-PI(N)))
PNCHARGE = ALFA/(1.0 + ALFA)
RETURN
END

```

```

C|||||
C-----C
C      The Brent's method of finding the root of a function C
C      FUNC known to lie between X1 and X2                  C
C      Buy and copy it from the book by W.H. Press,         C
C      B.P. Flannery, S.A. Teukolsky and W.T. Vetterling     C
C      Numerical Recipes - The Art of Scientific Computing   C
C      Cambridge University Press, 1996.                     C
C-----C
C      FUNCTION zbrent(FUNC,X1,X2,TOL,MAXEL)
C      PARAMETER (ITMAX=100,EPS=3.E-8)
C      COMMON IC,ID,IE,IH,IK,IR,IY, PI(9)
C      EXTERNAL FUNC

```
