# Supplementary material for: Compression of Large Sets of Sequence Data Reveals Fine Diversification of Functional Profiles in Multigene Families of Proteins: A Study for Peptidyl-Prolyl cis/trans Isomerases (PPIase)
Source: MDPI journal article supplement (doi:10.3390/biom9020059), 2019-02-11
Supplement: s1 [file s1]

|    | Fk1a  | Fk1b  | Fk3   | Fk4a  | Fk4b  | Fk5a  | Fk5b  | Fk6   | Fk8   | Fk2   | Fk7   | Fk11  | Fk14  | Fk9a  | Fk9b  | Fk9c  | Fk9d  | Fk10a | Fk10b | Fk10c | Fk10d |
|----|-------|-------|-------|-------|-------|-------|-------|-------|-------|-------|-------|-------|-------|-------|-------|-------|-------|-------|-------|-------|-------|
| 1  | 0,328 | 0,198 | 0,034 | 0,109 | 0     | 0     | 0     | 0,386 | 0,006 | 0,162 | 0,171 | 0,388 | 0,266 | 0,684 | 0,027 | 0,368 | 0,175 | 0,036 | 0,535 | 0,69  | 0,165 |
| 2  | 0,076 | 0,135 | 0,007 | 0,088 | 0,44  | 0,402 | 0,061 | 0,04  | 0,26  | 0     | 0,08  | 0,057 | 0,051 | 0,054 | 0,052 | 0     | 0,213 | 0     | 0,669 | 0,026 | 0,019 |
| 3  | 0,577 | 0,503 | 0,281 | 0,208 | 0,011 | 0     | 0     | 0,409 | 0,048 | 0,054 | 0,014 | 0,13  | 0,036 | 0,054 | 0,499 | 0,222 | 0,49  | 0     | 0,517 | 0,107 | 0,525 |
| 4  | 0,221 | 0,211 | 0,007 | 0,202 | 0,541 | 0     | 0     | 0,028 | 0,045 | 0     | 0,02  | 0,133 | 0,007 | 0,116 | 0,02  | 0,201 | 0,085 | 0,015 | 0     | 0,701 | 0,468 |
| 5  | 0,285 | 0,358 | 0,246 | 0,589 | 0,367 | 0     | 0,131 | 0,506 | 0,498 | 0,015 | 0,086 | 0,175 | 0     | 0,521 | 0,013 | 0,513 | 0,182 | 0,058 | 0,517 | 0,49  | 0,424 |
| 6  | 0,61  | 0,611 | 0,041 | 0     | 0,571 | 0     | 0,007 | 0,134 | 0,017 | 0,26  | 0,407 | 0,154 | 0,512 | 0,228 | 0,276 | 0,618 | 0,495 | 0,688 | 0,508 | 0,314 | 0,676 |
| 7  | 0,134 | 0,208 | 0,028 | 0,515 | 0,722 | 0,148 | 0,511 | 0,348 | 0,611 | 0,088 | 0,445 | 0,599 | 0,007 | 0,247 | 0,289 | 0     | 0,639 | 0,029 | 0,56  | 0,02  | 0,11  |
| 8  | 0,618 | 0,583 | 0,055 | 0,225 | 0,602 | 0,703 | 0,007 | 0,477 | 0,676 | 0,372 | 0,033 | 0,16  | 0,007 | 0,032 | 0,007 | 0     | 0,157 | 0,007 | 0,503 | 0,02  | 0,032 |
| 9  | 0,489 | 0,45  | 0,055 | 0,156 | 0,167 | 0     | 0     | 0,655 | 0,183 | 0,194 | 0,153 | 0,266 | 0,097 | 0,192 | 0,631 | 0,139 | 0,006 | 0,153 | 0,512 | 0,697 | 0,628 |
| 10 | 0,1   | 0,199 | 0,007 | 0,016 | 0,312 | 0,64  | 0     | 0,082 | 0,669 | 0,621 | 0,305 | 0,152 | 0,021 | 0,429 | 0,648 | 0,615 | 0,013 | 0,355 | 0,502 | 0,662 | 0,164 |
| 11 | 0,114 | 0,222 | 0,048 | 0,541 | ----- | 0,489 | ----- | 0,676 | 0,742 | ----- | ----- | 0,641 | ----- | ----- | ----- | ----- | ----- | ----- | ----- | ----- | 0,779 |
| 12 | 0,207 | 0,239 | 0,068 | 0,118 | 0,419 | 0,384 | 0     | 0,198 | 0,766 | 0,005 | 0,04  | 0,106 | 0     | 0,083 | 0     | 0     | 0,663 | 0     | 0,65  | 0     | 0     |
| 13 | 0,719 | 0,662 | 0,211 | 0,528 | 0,36  | 0,09  | 0     | ----- | 0,71  | 0,549 | 0,201 | 0,589 | 0,236 | 0,554 | 0,513 | 0,344 | 0,14  | 0,518 | 0,707 | 0,68  | 0,063 |
| 14 | 0,413 | 0,282 | 0,158 | 0,261 | 0,643 | 0,6   | 0,145 | 0,563 | 0,475 | 0,259 | 0,559 | 0,533 | 0,007 | 0,042 | 0     | 0     | 0     | 0,007 | 0,78  | 0     | 0,547 |
| 15 | 0,106 | 0,077 | 0,075 | 0,587 | 0,573 | 0     | 0,177 | 0,593 | 0,109 | 0,073 | 0,502 | 0,73  | 0,014 | 0,558 | 0,323 | 0,28  | 0,29  | 0,029 | 0,374 | 0,033 | 0,045 |
| 16 | 0,083 | 0,048 | 0     | 0,038 | 0,018 | 0     | 0,007 | 0,158 | 0,039 | 0,136 | 0,12  | 0,503 | 0,021 | 0,083 | 0,065 | 0,006 | 0,322 | 0,043 | 0,686 | 0,457 | 0,351 |
| 17 | 0,27  | 0,178 | 0,068 | 0,547 | 0,272 | 0     | 0,007 | 0,658 | 0,72  | 0,144 | 0,052 | 0,602 | 0,007 | 0,198 | 0,007 | 0,312 | 0,282 | 0,304 | 0,695 | 0,091 | 0,548 |
| 18 | 0,682 | 0,632 | 0     | 0,629 | 0,06  | 0     | 0,007 | 0,594 | 0,409 | 0,13  | 0,026 | 0,623 | 0,544 | 0,618 | 0     | 0,435 | 0,085 | 0,532 | 0,645 | 0,497 | 0,629 |
| 19 | 0,08  | 0,09  | 0,014 | 0,029 | 0,231 | 0     | 0,014 | 0,399 | 0,285 | 0,01  | 0,026 | 0,086 | 0     | 0,103 | 0     | 0     | 0,025 | 0,19  | 0,662 | 0     | 0,642 |
| 20 | 0,167 | 0,09  | 0,041 | 0,527 | 0,28  | 0     | 0,1   | 0,505 | 0,056 | 0     | 0,039 | 0,095 | 0,014 | 0,062 | 0     | 0     | 0,013 | 0,014 | 0,705 | 0     | 0     |
| 21 | 0,585 | 0,423 | 0,577 | 0,424 | 0,516 | 0     | 0,217 | 0,49  | 0,547 | 0,454 | 0,026 | 0,157 | 0,007 | 0,083 | 0     | 0     | 0,013 | 0,095 | 0,607 | 0     | 0,407 |
| 22 | 0,312 | 0,465 | 0     | 0     | 0,046 | 0,407 | 0     | 0,671 | 0,239 | 0     | 0,026 | 0,086 | 0     | 0,072 | 0     | 0     | 0     | 0     | 0     | 0     | 0,013 |
| 23 | 0,592 | 0,475 | 0,428 | 0,682 | 0,43  | 0     | 0,191 | 0,081 | 0,344 | 0,503 | 0,052 | 0,522 | 0     | 0,082 | 0     | 0     | 0,006 | 0     | 0     | 0     | 0,285 |
| 24 | 0,101 | 0,057 | 0,087 | 0,004 | 0,011 | 0     | 0     | 0,061 | 0,003 | 0,015 | 0,046 | 0,111 | 0     | 0,093 | 0     | 0,013 | 0     | 0,007 | 0,007 | 0     | 0     |
| 25 | 0,057 | 0,039 | 0,061 | 0,007 | 0,738 | 0     | 0,127 | 0,166 | 0,526 | 0,015 | 0,064 | 0,162 | 0     | 0,073 | 0     | 0     | 0     | 0,021 | 0,021 | 0,013 | 0,044 |
| 26 | 0,054 | 0,039 | 0,021 | 0,004 | 0,346 | 0,435 | 0,061 | 0,011 | 0,263 | 0,01  | 0,064 | 0,207 | 0,258 | 0,093 | 0,02  | 0     | 0     | 0,014 | 0,014 | 0     | 0     |
| 27 | 0,53  | 0,446 | 0,061 | 0,415 | 0,601 | 0     | 0,101 | 0,386 | 0,663 | 0,239 | 0,057 | 0,216 | 0,035 | 0,424 | 0     | 0     | 0,006 | 0,028 | 0,028 | 0,007 | 0     |
| 28 | 0,072 | 0,087 | 0,007 | 0,004 | 0,074 | 0,124 | 0,014 | 0,187 | 0,685 | 0,005 | 0,094 | 0,016 | 0,028 | 0,083 | 0     | 0,031 | 0     | 0,252 | 0,252 | 0,033 | 0,006 |
| 29 | 0,333 | 0,502 | 0,458 | 0,611 | 0,71  | 0     | 0,636 | 0,114 | 0,651 | 0,47  | 0,063 | 0,484 | 0     | 0,47  | 0     | 0     | 0     | 0,021 | 0,021 | 0,013 | 0     |
| 30 | 0,053 | 0,035 | 0,054 | 0,025 | 0,71  | 0,5   | 0,259 | 0,296 | 0,034 | 0,005 | 0,051 | 0     | 0,183 | 0,119 | 0,335 | 0,006 | 0,05  | 0,062 | 0,062 | 0,428 | 0     |
| 31 | 0,599 | 0,486 | 0,157 | 0,249 | 0,673 | 0,206 | 0,285 | 0,131 | 0,347 | 0,376 | 0,094 | 0,36  | 0,028 | 0,267 | 0,013 | 0     | 0     | 0,689 | 0,689 | 0,256 | 0,006 |
| 32 | 0,087 | 0,09  | ----- | 0,014 | 0,499 | 0     | 0,404 | 0,659 | 0,602 | ----- | 0,456 | ----- | 0,375 | ----- | ----- | ----- | ----- | ----- | ----- | ----- | ----- |
| 33 | 0,026 | 0,031 | 0,007 | 0,018 | ----- | 0,131 | ----- | 0,719 | 0,18  | 0,037 | 0,095 | 0,046 | 0     | 0,15  | 0     | 0     | 0,006 | 0,028 | 0,028 | 0,007 | 0,013 |
| 34 | 0,569 | 0,488 | 0,014 | 0,117 | ----- | 0,024 | ----- | 0,186 | 0,258 | 0,01  | 0,124 | 0     | 0,007 | 0,121 | 0     | 0     | 0,019 | 0,014 | 0,014 | 0,007 | 0,013 |
| 35 | 0,224 | 0,122 | 0,1   | 0,389 | 0,506 | 0,008 | 0,381 | 0,598 | 0,531 | 0,088 | 0,122 | 0,154 | 0,007 | 0,656 | 0     | 0     | 0     | 0,201 | 0,201 | 0,335 | 0,032 |
| 36 | ----- | ----- | 0     | ----- | 0,08  | ----- | 0,492 | 0,123 | 0,031 | 0,327 | 0,349 | 0,032 | 0,08  | 0,158 | 0,007 | 0,505 | 0,013 | 0,343 | 0,343 | 0,447 | 0,537 |
| 37 | 0,072 | 0,072 | 0     | 0,007 | 0,063 | 0,008 | 0     | 0,014 | 0,042 | 0,01  | 0,112 | 0,248 | 0,027 | 0,11  | 0     | 0     | 0     | 0,1   | 0,1   | 0,026 | 0,006 |
| 38 | 0,009 | 0,009 | 0     | 0     | 0,094 | 0,179 | 0     | 0,283 | 0,418 | 0     | 0,037 | 0,016 | 0,148 | 0,119 | 0     | 0     | 0,352 | 0,041 | 0,041 | 0,039 | 0,013 |
| 39 | 0,014 | 0,026 | 0,014 | 0,025 | 0,471 | 0,016 | 0,321 | 0,029 | 0,331 | 0,059 | 0,139 | 0,032 | 0,041 | 0,163 | 0     | 0     | 0,006 | 0,081 | 0,081 | 0,007 | 0,006 |
| 40 | 0,003 | 0,018 | 0,014 | 0,018 | ----- | 0,316 | ----- | 0,513 | ----- | 0,01  | 0,012 | 0,024 | 0     | 0,087 | 0     | 0     | 0,145 | 0,014 | 0,014 | 0,007 | 0,006 |
| 41 | 0,117 | 0,026 | 0,055 | 0,508 | ----- | 0,016 | ----- | 0,779 | ----- | 0,334 | 0,006 | 0,055 | 0,099 | 0     | 0,007 | 0     | 0,019 | 0,338 | 0,338 | 0,013 | 0,337 |
| 42 | 0,138 | 0,068 | 0,467 | 0,233 | ----- | 0,016 | ----- | 0,724 | ----- | 0,556 | 0,036 | 0,138 | 0,328 | 0,009 | 0,318 | 0,062 | 0,013 | 0,02  | 0,02  | 0,452 | 0,146 |
| 43 | 0,014 | 0     | 0,355 | 0,025 | ----- | 0,438 | ----- | 0,581 | ----- | 0,458 | 0,12  | 0,071 | 0,344 | 0     | 0     | 0,019 | 0,593 | 0,014 | 0,014 | 0,033 | 0,094 |
| 44 | 0,513 | 0,507 | 0,355 | 0,647 | ----- | 0,125 | ----- | 0,424 | ----- | 0,379 | 0,286 | ----- | 0,393 | 0,537 | 0,007 | 0,025 | 0,53  | 0,604 | 0,604 | 0     | 0,525 |
| 45 | ----- | ----- | 0,52  | ----- | ----- | ----- | ----- | ----- | ----- | ----- | 0,2   | ----- | 0,007 | ----- | ----- | ----- | ----- | ----- | ----- | ----- | ----- |

|    |       |       |       |       |       |       |       |       |       |       |       |       |       |       |       |       |       |       |       |       |       |
|----|-------|-------|-------|-------|-------|-------|-------|-------|-------|-------|-------|-------|-------|-------|-------|-------|-------|-------|-------|-------|-------|
| 46 | ----  | ----  | 0,049 | ----  | ----  | ----  | ----  | ----  | ----  | ----  | ----  | ----  | ----  | ----  | ----  | ----  | ----  | ----  | ----  | ----  |       |
| 47 | ----  | ----  | 0,042 | ----  | ----  | ----  | ----  | ----  | ----  | ----  | ----  | ----  | ----  | ----  | ----  | ----  | ----  | ----  | ----  | ----  |       |
| 48 | ----  | ----  | 0,035 | ----  | ----  | ----  | ----  | ----  | ----  | ----  | ----  | ----  | ----  | ----  | ----  | ----  | ----  | ----  | ----  | ----  |       |
| 49 | ----  | ----  | 0,022 | ----  | ----  | ----  | ----  | ----  | ----  | ----  | ----  | ----  | ----  | ----  | ----  | ----  | ----  | ----  | ----  | ----  |       |
| 50 | ----  | ----  | 0,532 | ----  | ----  | ----  | ----  | ----  | ----  | ----  | ----  | ----  | ----  | ----  | ----  | ----  | ----  | ----  | ----  | ----  |       |
| 51 | ----  | ----  | 0,352 | ----  | ----  | ----  | ----  | ----  | ----  | 0     | ----  | 0,437 | ----  | ----  | ----  | ----  | ----  | ----  | ----  | ----  |       |
| 52 | 0,645 | 0,539 | 0,148 | 0,245 | 0,039 | 0,154 | 0,014 | 0,713 | 0,62  | 0,317 | 0,047 | 0,055 | 0,093 | 0,018 | 0,013 | 0,038 | 0,329 | 0,621 | 0,621 | 0,573 | 0,738 |
| 53 | 0,059 | 0,056 | 0,048 | 0,556 | 0,148 | 0,016 | 0     | 0,295 | 0,583 | 0,107 | 0     | 0,047 | 0,087 | 0     | 0     | 0     | 0,044 | 0,454 | 0,454 | 0     | 0,319 |
| 54 | 0,011 | 0     | 0,035 | 0,011 | 0,036 | 0,322 | 0     | 0,555 | 0,214 | 0,228 | 0,207 | 0,063 | 0,061 | 0     | 0,007 | 0     | 0     | 0,505 | 0,505 | 0     | 0,274 |
| 55 | 0,606 | 0,403 | 0,213 | 0,544 | 0,638 | 0,023 | 0,703 | 0,434 | 0,625 | 0,611 | 0     | 0,306 | 0     | 0,009 | 0,007 | 0     | 0,006 | 0,171 | 0,171 | 0     | 0,247 |
| 56 | 0,45  | 0,23  | 0     | 0,004 | 0,018 | 0,418 | 0     | 0,287 | 0,38  | 0,04  | 0,024 | 0,071 | 0,067 | 0     | 0     | 0     | 0,038 | 0,596 | 0,596 | 0,007 | 0,305 |
| 57 | 0,7   | 0,471 | 0,035 | 0,336 | 0,518 | 0,023 | 0,327 | 0,264 | 0,583 | 0,161 | 0     | 0,152 | 0,014 | 0,027 | 0,007 | 0     | 0,006 | 0,395 | 0,395 | 0     | 0,287 |
| 58 | 0,009 | 0,018 | 0     | 0,018 | 0,135 | 0,008 | 0     | 0,099 | 0,04  | 0     | 0,006 | 0     | 0     | 0     | 0,007 | 0     | 0,006 | 0,04  | 0,04  | 0     | 0     |
| 59 | 0,014 | 0,004 | 0,007 | 0,097 | 0,053 | 0,046 | 0,007 | 0,158 | 0,083 | 0,005 | 0     | 0,016 | 0     | 0     | 0     | 0     | 0     | 0     | 0     | 0     | 0     |
| 60 | 0,586 | 0,401 | 0,163 | 0,239 | 0,011 | 0,067 | 0     | 0,562 | ----  | 0,441 | 0,012 | 0,529 | 0,014 | 0,044 | 0,007 | 0,501 | 0     | 0,279 | 0,279 | 0,652 | 0,351 |
| 61 | 0,453 | 0,555 | 0,035 | 0,198 | 0,108 | 0,023 | 0,246 | 0,338 | ----  | 0,02  | 0     | 0,078 | 0,483 | 0,391 | 0     | 0,006 | 0     | 0,047 | 0,047 | 0     | 0,312 |
| 62 | ----  | ----  | ----  | ----  | 0,448 | ----  | 0     | ----  | ----  | ----  | ----  | ----  | ----  | ----  | ----  | ----  | ----  | ----  | ----  | ----  | ----  |
| 63 | ----  | ----  | ----  | ----  | 0,606 | ----  | 0,014 | ----  | 0,026 | ----  | ----  | ----  | ----  | ----  | ----  | ----  | ----  | ----  | ----  | ----  | ----  |
| 64 | ----  | ----  | ----  | ----  | 0,632 | ----  | 0,258 | ----  | 0,665 | ----  | ----  | ----  | ----  | ----  | ----  | ----  | ----  | ----  | ----  | ----  | ----  |
| 65 | 0,322 | 0,2   | 0,068 | 0,519 | 0,531 | 0     | 0,314 | 0,314 | 0     | 0,074 | 0,102 | 0,455 | 0     | 0,009 | 0     | 0,006 | 0,377 | 0,053 | 0,053 | 0,013 | 0,1   |
| 66 | 0     | 0     | 0     | 0     | 0,004 | 0     | 0     | 0,401 | 0,051 | 0     | 0     | 0,016 | 0,048 | 0     | 0     | 0     | 0,218 | 0,06  | 0,06  | 0     | 0     |
| 67 | 0,003 | 0,004 | 0     | 0,495 | 0,492 | 0     | 0     | 0,032 | 0,189 | 0,02  | 0     | 0,008 | 0     | 0     | 0     | 0     | 0,013 | 0     | 0     | 0     | 0     |
| 68 | 0,083 | 0,048 | 0,021 | 0,018 | 0,795 | 0,074 | 0,101 | 0,758 | 0,089 | 0,121 | 0,012 | 0,351 | 0,094 | 0,433 | 0,33  | 0,431 | 0     | 0,329 | 0,329 | 0,503 | 0,227 |
| 69 | 0,034 | 0,026 | 0,014 | 0,26  | 0,032 | 0,074 | 0     | 0,004 | 0,347 | 0     | 0     | 0     | 0     | 0     | 0     | 0     | 0     | 0     | 0     | 0     | 0     |
| 70 | 0,014 | 0,009 | 0     | 0     | 0,007 | 0     | 0     | 0,111 | 0,085 | 0,005 | 0     | 0,07  | 0     | 0     | 0     | 0     | 0,239 | 0     | 0     | 0     | 0     |
| 71 | 0,003 | 0     | 0,014 | 0,004 | 0,004 | 0,015 | 0     | 0,06  | 0,003 | 0,005 | 0     | 0,008 | 0     | 0     | 0     | 0     | 0     | 0     | 0     | 0     | 0     |
| 72 | 0,105 | 0,048 | 0     | 0,018 | 0,49  | 0,194 | 0,014 | 0,07  | 0,216 | 0,064 | 0,041 | 0,07  | 0,505 | 0,499 | 0,521 | 0,013 | 0     | 0     | 0     | 0,388 | 0,657 |
| 73 | 0,051 | 0,022 | 0,25  | 0,503 | 0,091 | 0     | 0,028 | 0,301 | 0,65  | 0     | 0,395 | 0,245 | 0     | 0,027 | 0     | 0,031 | 0     | 0,007 | 0,007 | 0,357 | 0,063 |
| 74 | 0,02  | 0,077 | 0     | 0     | 0,011 | 0,253 | 0     | 0     | 0,039 | 0     | 0     | 0,016 | 0     | 0     | 0,007 | 0     | 0,283 | 0     | 0     | 0     | 0,006 |
| 75 | 0,479 | 0,438 | 0,021 | 0,074 | 0,427 | 0     | 0,028 | 0,371 | 0,689 | 0,025 | 0,278 | 0,024 | 0,455 | 0,009 | 0,007 | 0     | 0,031 | 0,51  | 0,51  | 0,211 | 0,667 |
| 76 | 0,364 | 0,257 | 0,048 | 0,004 | 0,358 | 0     | 0,035 | 0,039 | 0,211 | 0,36  | 0,228 | 0,459 | 0,494 | 0,018 | 0,013 | 0,025 | 0     | 0     | 0     | 0     | 0,356 |
| 77 | 0     | 0     | 0     | 0     | 0,431 | 0,291 | 0     | 0     | 0,006 | 0,005 | 0     | 0,008 | 0     | 0     | 0,007 | 0     | 0,614 | 0     | 0     | 0,19  | 0     |
| 78 | 0,171 | 0,177 | 0,055 | 0,053 | 0,531 | 0,122 | 0,007 | 0,267 | 0,135 | 0,005 | 0     | 0,008 | 0     | 0     | 0,007 | 0     | 0,091 | 0,007 | 0,007 | 0     | 0     |
| 79 | 0,077 | 0,056 | 0,106 | 0,456 | 0,552 | 0,015 | 0,007 | 0,147 | 0,305 | 0,358 | 0,168 | 0,407 | 0,23  | 0     | 0,007 | 0,444 | 0     | 0     | 0     | 0,114 | 0,051 |
| 80 | 0,034 | 0,013 | 0,007 | 0,046 | 0,499 | 0     | 0,554 | 0,287 | 0,302 | 0,119 | 0     | 0,008 | 0     | 0     | 0     | 0     | 0     | 0,073 | 0,073 | 0,007 | 0     |
| 81 | 0,07  | 0,039 | 0,007 | 0     | 0     | 0,008 | 0     | 0     | 0,003 | 0,01  | 0     | 0,016 | 0,007 | 0     | 0     | 0     | 0     | 0,007 | 0,007 | 0     | 0     |
| 82 | 0,169 | 0,113 | 0,317 | 0,247 | 0,617 | 0     | 0,633 | 0,513 | 0,617 | 0,165 | 0     | 0,008 | 0,014 | 0     | 0,007 | 0     | 0,013 | 0,014 | 0,014 | 0,209 | 0,013 |
| 83 | 0,089 | 0,047 | 0,034 | 0,442 | 0,256 | 0,622 | 0,1   | 0,413 | 0,289 | 0,025 | 0     | 0,413 | 0,007 | 0,221 | 0     | 0     | 0     | 0,007 | 0,007 | 0,013 | 0,019 |
| 84 | 0,397 | 0,207 | 0,443 | 0,679 | 0,519 | 0,045 | 0,028 | 0,395 | 0,436 | 0,116 | 0     | 0,008 | 0,048 | 0,402 | 0,027 | 0,193 | 0,013 | 0,097 | 0,097 | 0,007 | 0,614 |
| 85 | 0,011 | 0     | 0     | 0,128 | 0,429 | 0,102 | 0,068 | 0,079 | 0,036 | 0     | 0     | 0,139 | 0     | 0     | 0     | 0     | 0     | 0,007 | 0,007 | 0     | 0,006 |
| 86 | 0,415 | 0,323 | 0,182 | 0,344 | 0,728 | 0,03  | 0,271 | 0,107 | 0,697 | 0,319 | 0,432 | 0,408 | 0,494 | 0,18  | 0,013 | 0,268 | 0,359 | 0,442 | 0,442 | 0,494 | 0,212 |
| 87 | 0,498 | 0,245 | 0     | 0,096 | 0,014 | 0,023 | 0     | 0,468 | 0,406 | 0,015 | 0     | 0     | 0     | 0     | 0     | 0     | 0     | 0     | 0     | 0     | 0     |
| 88 | 0,156 | 0,022 | 0,007 | 0,476 | 0,311 | 0,008 | 0,533 | 0,669 | 0,243 | 0     | 0     | 0     | 0     | 0,009 | 0     | 0     | 0     | 0,007 | 0,007 | 0     | 0     |
| 89 | 0,334 | 0,174 | 0,198 | 0,221 | 0,455 | 0,045 | 0,068 | 0,19  | 0,64  | 0,527 | 0,119 | 0,525 | 0,047 | 0,086 | 0     | 0     | 0     | 0,007 | 0,007 | 0     | 0,006 |
| 90 | 0,086 | 0,013 | 0,007 | 0,137 | 0,639 | 0     | 0,164 | 0,635 | 0,272 | 0,286 | 0,194 | 0,147 | 0,385 | 0,434 | 0,254 | 0     | 0     | 0,053 | 0,053 | 0     | 0,006 |
| 91 | 0,15  | 0,491 | 0,021 | 0,025 | 0,08  | 0,023 | 0     | 0,221 | 0,036 | 0,005 | 0,501 | 0,016 | 0,007 | 0     | 0     | 0     | 0     | 0,007 | 0,007 | 0     | 0,192 |

|     |       |       |       |       |       |       |       |       |       |       |       |       |       |       |       |       |       |       |       |       |       |
|-----|-------|-------|-------|-------|-------|-------|-------|-------|-------|-------|-------|-------|-------|-------|-------|-------|-------|-------|-------|-------|-------|
| 92  | 0,25  | 0,146 | 0,048 | 0,08  | 0,512 | 0     | 0,021 | 0,089 | 0,606 | 0,217 | 0,018 | 0,076 | 0,479 | 0,078 | 0,331 | 0,247 | 0     | 0,447 | 0,447 | 0,089 | 0,5   |
| 93  | ----- | ----- | ----- | ----- | ----- | ----- | ----- | ----- | ----- | ----- | ----- | ----- | ----- | ----- | ----- | ----- | ----- | ----- | ----- | ----- | ----- |
| 94  | 0     | 0,004 | 0,007 | 0     | 0,011 | 0     | 0,007 | 0,004 | 0,006 | 0,005 | 0     | 0,016 | 0     | 0     | 0,007 | 0,006 | 0,05  | 0,02  | 0,02  | 0     | 0,013 |
| 95  | 0     | 0     | 0,007 | 0,014 | 0,314 | 0,303 | 0     | 0,186 | 0,028 | 0     | 0     | 0     | 0     | 0     | 0     | 0     | 0,108 | 0     | 0     | 0     | 0,006 |
| 96  | 0,711 | 0,632 | 0,048 | 0,684 | 0,612 | 0,141 | 0,366 | 0,735 | 0,744 | 0,243 | 0,529 | 0,047 | 0,027 | 0,461 | 0,052 | 0     | 0     | 0,073 | 0,073 | 0     | 0,006 |
| 97  | 0,461 | 0,571 | 0,014 | 0,515 | 0,6   | 0     | 0,397 | 0,384 | 0,617 | 0,36  | 0,277 | 0,023 | 0,014 | 0,133 | 0,128 | 0,013 | 0     | 0,254 | 0,254 | 0,269 | 0,599 |
| 98  | 0,009 | 0,013 | 0     | 0,025 | 0,077 | 0,276 | 0     | 0     | 0,034 | 0,005 | 0,018 | 0,008 | 0     | 0,018 | 0     | 0     | 0     | 0,007 | 0,007 | 0     | 0,051 |
| 99  | ----- | ----- | 0,431 | ----- | 0,617 | ----- | 0,035 | ----- | 0,624 | ----- | 0,357 | ----- | ----- | ----- | ----- | ----- | ----- | ----- | ----- | ----- | ----- |
| 100 | 0,599 | 0,444 | 0,061 | 0,105 | 0,613 | 0,402 | 0,279 | 0,116 | 0,409 | 0,323 | 0,43  | 0,35  | ----- | 0,383 | 0     | 0,32  | 0,636 | 0,202 | 0,202 | 0,502 | 0,032 |
| 101 | 0,128 | 0,081 | 0,034 | 0,145 | 0,546 | 0,193 | 0,374 | 0,213 | 0,562 | 0,173 | 0,015 | 0,031 | 0,08  | 0,567 | 0,007 | 0,019 | 0,006 | 0,484 | 0,484 | 0,027 | 0,463 |
| 102 | 0,406 | 0,262 | 0,365 | 0,046 | 0,28  | 0,015 | 0,095 | 0,049 | 0,187 | 0,144 | 0,19  | 0,008 | 0     | 0,443 | 0,319 | 0,517 | 0     | 0,37  | 0,37  | 0,157 | 0,112 |
| 103 | 0,043 | 0,031 | 0,127 | 0,425 | 0,46  | 0     | 0,405 | 0,529 | 0,635 | 0,261 | 0,028 | 0,168 | 0,041 | 0,053 | 0,02  | ----- | 0,273 | 0,08  | 0,08  | 0,515 | ----- |
| 104 | 0,014 | 0,026 | 0,055 | 0     | 0     | 0,008 | 0     | 0,004 | 0,003 | 0     | 0     | 0     | 0,007 | 0     | 0,013 | 0     | 0,142 | 0,007 | 0,007 | 0     | 0     |
| 105 | 0,011 | 0     | 0,007 | 0,018 | 0,007 | 0,45  | 0,44  | 0,109 | 0,075 | 0,005 | 0     | 0     | 0     | 0     | 0,02  | 0     | 0     | 0,007 | 0,007 | 0     | 0     |
| 106 | 0,228 | 0,188 | 0,049 | 0,229 | 0,31  | 0,074 | 0,492 | 0,332 | 0,399 | 0,408 | 0,024 | 0,498 | 0,027 | 0,151 | 0,165 | 0     | 0     | 0,151 | 0,151 | 0,243 | 0,371 |
| 107 | 0,195 | 0,142 | 0,089 | 0,167 | 0,327 | 0,266 | 0     | 0,461 | 0,637 | 0,493 | 0,012 | 0,024 | 0,216 | 0     | 0,027 | 0     | 0     | 0     | 0     | 0,013 | 0,013 |
| 108 | 0,453 | 0,375 | 0,174 | 0,287 | 0,183 | 0,137 | 0,241 | 0,555 | 0,248 | 0,273 | 0,058 | 0,149 | 0,014 | 0,459 | 0,013 | 0     | 0,038 | 0,371 | 0,371 | 0,007 | 0     |
| 109 | 0,222 | 0,201 | 0,197 | 0,063 | 0,557 | 0     | 0,042 | 0,491 | 0,726 | 0,262 | 0,018 | 0,334 | 0,014 | 0,018 | 0,013 | 0     | 0     | 0,2   | 0,2   | 0,013 | 0     |
| 110 | 0,009 | 0,013 | 0,035 | 0     | 0,007 | 0,412 | 0     | 0,073 | 0,014 | 0,04  | 0     | 0,047 | 0,007 | 0     | 0     | 0     | 0     | 0     | 0     | 0     | 0     |
| 111 | 0,439 | 0,298 | 0,47  | 0,409 | 0,483 | 0     | 0,163 | 0,091 | 0,71  | 0,267 | 0     | 0,428 | 0,208 | 0,053 | 0     | 0     | 0     | 0,455 | 0,455 | 0     | 0,545 |
| 112 | 0,014 | 0,018 | 0,028 | 0     | 0,029 | 0     | 0     | 0,059 | 0,495 | 0,055 | 0     | 0,039 | 0,007 | 0     | 0     | 0     | 0     | 0,007 | 0,007 | 0     | 0     |
| 113 | 0,017 | 0,009 | 0,035 | 0,014 | 0,62  | 0     | 0,028 | 0,333 | 0,316 | 0,13  | 0     | 0,032 | 0,23  | 0     | 0     | 0,013 | 0,006 | 0     | 0     | 0,095 | 0,082 |
| 114 | 0,006 | 0,009 | 0,021 | 0     | 0     | 0,108 | 0     | 0,007 | 0,006 | 0,121 | 0,006 | 0,127 | 0     | 0     | 0     | 0     | 0     | 0     | 0     | 0     | 0     |
| 115 | 0,031 | 0,018 | 0,036 | 0,11  | 0,539 | 0,053 | 0,158 | 0,247 | 0,537 | 0,093 | 0     | 0,055 | 0,014 | 0     | 0,02  | 0,122 | 0     | 0,216 | 0,216 | 0,139 | 0     |
| 116 | 0,017 | 0,022 | 0,007 | 0,004 | 0,014 | 0,124 | 0,007 | 0,004 | 0     | 0,015 | 0     | 0,024 | 0     | 0     | 0     | 0     | 0     | 0     | 0     | 0     | 0     |
| 117 | 0,017 | 0,009 | 0,05  | 0,481 | 0,508 | 0,278 | 0,068 | 0,07  | 0,516 | 0,065 | 0,139 | 0,016 | 0,014 | 0,018 | 0     | 0     | 0,013 | 0,041 | 0,041 | 0     | 0,013 |
| 118 | 0,569 | 0,517 | 0,422 | 0,331 | 0,567 | 0,054 | 0,328 | 0,196 | 0,661 | 0,534 | 0,281 | 0,626 | 0,007 | 0     | 0     | 0     | 0     | 0     | 0     | 0     | 0     |
| 119 | 0,179 | 0,124 | 0,007 | 0,004 | 0,161 | 0,256 | 0,007 | 0,094 | 0,244 | 0,035 | 0     | 0,008 | 0,007 | 0     | 0,02  | 0,006 | 0,044 | 0     | 0     | 0     | 0     |
| 120 | 0,272 | 0,221 | 0,084 | 0,397 | 0,12  | 0,397 | 0,088 | 0,241 | 0,727 | 0,287 | 0,418 | 0,541 | 0,061 | 0     | 0     | 0     | ----- | 0     | 0     | 0,007 | 0,007 |
|     | Fk1a  | Fk1b  | Fk3   | Fk4a  | Fk4b  | Fk5a  | Fk5b  | Fk6   | Fk8   | Fk2   | Fk7   | Fk11  | Fk14  | Fk9a  | Fk9b  | Fk9c  | Fk9d  | Fk10a | Fk10b | Fk10c | Fk10d |
