# Supplementary material for: Compression of Large Sets of Sequence Data Reveals Fine Diversification of Functional Profiles in Multigene Families of Proteins: A Study for Peptidyl-Prolyl cis/trans Isomerases (PPIase)
Source: MDPI journal article supplement (doi:10.3390/biom9020059), 2019-02-11
Supplement: s1 [file s1]

## FKBP38s

( 1) NP\_036313  
peptidyl-prolyl cis-trans isomerase FKBP8 isoform 1 [Homo sapiens].  
( 2) NP\_001295302  
peptidyl-prolyl cis-trans isomerase FKBP8 isoform 2 [Homo sapiens].  
( 3) XP\_003817801  
peptidyl-prolyl cis-trans isomerase FKBP8 isoform X4 [Pan paniscus].  
( 4) XP\_010384957  
PREDICTED: peptidyl-prolyl cis-trans isomerase FKBP8 isoform X2 [Rhinopthec  
peptidyl-prolyl cis-trans isomerase FKBP8 isoform X2 [Pan paniscus].  
( 5) XP\_003817802  
peptidyl-prolyl cis-trans isomerase FKBP8 isoform X4 [Macaca nemestrina].  
( 6) XP\_011747960  
peptidyl-prolyl cis-trans isomerase FKBP8 isoform X4 [Papio anubis].  
( 7) XP\_003915233  
hypothetical protein EGM\_09459 [Macaca fascicularis].  
( 8) EHH59371  
PREDICTED: peptidyl-prolyl cis-trans isomerase FKBP8 isoform X4 [Macaca fasci  
peptidyl-prolyl cis-trans isomerase FKBP8 isoform X4 [Pongo abelii].  
( 10) XP\_002828980  
FKBP8 isoform 1, partial [Pongo abelii].  
( 11) PNJ28395  
PREDICTED: peptidyl-prolyl cis-trans isomerase FKBP8 isoform X4 [Cercopithecus a  
PREDICTED: peptidyl-prolyl cis-trans isomerase FKBP8 isoform X2 [Gorilla gori  
PREDICTED: peptidyl-prolyl cis-trans isomerase FKBP8 isoform X2 [Chlorocebus  
PREDICTED: peptidyl-prolyl cis-trans isomerase FKBP8 isoform X2 [Macaca mulat  
peptidyl-prolyl cis-trans isomerase FKBP8 isoform X2 [Macaca nemestrina].  
( 16) XP\_011747796  
peptidyl-prolyl cis-trans isomerase FKBP8 isoform X2 [Papio anubis].  
( 17) XP\_003915232  
peptidyl-prolyl cis-trans isomerase FKBP8 isoform X2 [Pongo abelii].  
( 18) XP\_002828981  
PREDICTED: peptidyl-prolyl cis-trans isomerase FKBP8 isoform X2 [Saimir  
peptidyl-prolyl cis-trans isomerase FKBP8 isoform X3 [Pan paniscus].  
( 20) XP\_008969279  
PREDICTED: peptidyl-prolyl cis-trans isomerase FKBP8 isoform X1 [Mandrillus l  
peptidyl-prolyl cis-trans isomerase FKBP8 isoform X6 [Pan troglodytes].  
( 22) XP\_024207707  
peptidyl-prolyl cis-trans isomerase FKBP8 isoform X7 [Homo sapiens].  
( 23) XP\_011526166  
PREDICTED: peptidyl-prolyl cis-trans isomerase FKBP8 isoform X2 [Cercopithecus a  
PREDICTED: peptidyl-prolyl cis-trans isomerase FKBP8 isoform X2 [Cebus capuci  
peptidyl-prolyl cis-trans isomerase FKBP8 isoform X1 [Pan paniscus].  
( 25) XP\_017356796  
peptidyl-prolyl cis-trans isomerase FKBP8 isoform X1 [Macaca mulatta].  
( 26) XP\_008969278  
peptidyl-prolyl cis-trans isomerase FKBP8 [Macaca mulatta].  
( 27) NP\_001247999  
peptidyl-prolyl cis-trans isomerase FKBP8 isoform X1 [Homo sapiens].  
( 28) XP\_024307207  
peptidyl-prolyl cis-trans isomerase FKBP8 isoform X5 [Pan troglodytes].  
( 29) XP\_016791013  
peptidyl-prolyl cis-trans isomerase FKBP8 isoform X3 [Papio anubis].  
( 30) XP\_009192156  
peptidyl-prolyl cis-trans isomerase FKBP8 isoform X5 [Homo sapiens].  
( 31) XP\_024307210  
PREDICTED: peptidyl-prolyl cis-trans isomerase FKBP8 isoform X3 [Macaca fasci  
peptidyl-prolyl cis-trans isomerase FKBP8 isoform X3 [Macaca nemestrina].  
( 32) XP\_005588520  
peptidyl-prolyl cis-trans isomerase FKBP8 isoform X3 [Pongo abelii].  
( 34) XP\_024092631  
PREDICTED: peptidyl-prolyl cis-trans isomerase FKBP8 isoform X1 [Gorilla gori  
peptidyl-prolyl cis-trans isomerase FKBP8 isoform X3 [Pongo abelii].  
( 35) XP\_004060362  
PREDICTED: peptidyl-prolyl cis-trans isomerase FKBP8 isoform X3 [Cercopithecus a  
PREDICTED: peptidyl-prolyl cis-trans isomerase FKBP8 isoform X1 [Chlorocebus  
peptidyl-prolyl cis-trans isomerase FKBP8 isoform X1 [Macaca mulat  
peptidyl-prolyl cis-trans isomerase FKBP8 isoform X1 [Pongo abelii].  
( 39) XP\_009251263  
peptidyl-prolyl cis-trans isomerase FKBP8 isoform X1 [Macaca nemestrina].  
( 40) XP\_011747747

( 41) XP\_017822960 PREDICTED: peptidyl-prolyl cis-trans isomerase FKBP8 isoform X2 [Callithrix j  
( 42) XP\_009192157 peptidyl-prolyl cis-trans isomerase FKBP8 isoform X1 [Papio anubis].  
( 43) XP\_010328454 PREDICTED: peptidyl-prolyl cis-trans isomerase FKBP8 isoform X1 [Saimiri boli  
( 44) XP\_011845855 PREDICTED: peptidyl-prolyl cis-trans isomerase FKBP8 isoform X2 [Mandrillus l  
( 45) XP\_012299012 peptidyl-prolyl cis-trans isomerase FKBP8 isoform X2 [Aotus nancymaeae].  
( 46) XP\_011949833 PREDICTED: peptidyl-prolyl cis-trans isomerase FKBP8 isoform X1 [Cercopithecus a  
( 47) XP\_017356795 PREDICTED: peptidyl-prolyl cis-trans isomerase FKBP8 isoform X1 [Cebus capuci  
( 48) XP\_014401247 PREDICTED: peptidyl-prolyl cis-trans isomerase FKBP8 isoform X1 [Myotis brand  
( 49) EPQ12447 peptidyl-prolyl cis-trans isomerase FKBP8 [Myotis brandtii].  
( 50) XP\_008154612 PREDICTED: peptidyl-prolyl cis-trans isomerase FKBP8 isoform X2 [Eptesicus fu  
( 51) XP\_016066232 PREDICTED: peptidyl-prolyl cis-trans isomerase FKBP8 isoform X2 [Miniopterus  
( 52) XP\_012584673 PREDICTED: peptidyl-prolyl cis-trans isomerase FKBP8 isoform X1 [Condylura cr  
( 53) XP\_015413209 PREDICTED: peptidyl-prolyl cis-trans isomerase FKBP8 isoform X2 [Myotis david  
( 54) XP\_022262557 peptidyl-prolyl cis-trans isomerase FKBP8 isoform X2 [Canis lupus familiaris]  
( 55) XP\_023103313 peptidyl-prolyl cis-trans isomerase FKBP8 isoform X2 [Felis catus].  
( 56) XP\_019271925 PREDICTED: peptidyl-prolyl cis-trans isomerase FKBP8 isoform X3 [Panthera par  
( 57) XP\_007088417 PREDICTED: peptidyl-prolyl cis-trans isomerase FKBP8 isoform X2 [Panthera tig  
( 58) XP\_002761955 PREDICTED: peptidyl-prolyl cis-trans isomerase FKBP8 isoform X1 [Callithrix j  
( 59) XP\_014921066 PREDICTED: peptidyl-prolyl cis-trans isomerase FKBP8 isoform X2 [Acinonyx jub  
( 60) XP\_005972346 PREDICTED: peptidyl-prolyl cis-trans isomerase FKBP8 isoform X2 [Pantholops h  
( 61) XP\_006058025 PREDICTED: peptidyl-prolyl cis-trans isomerase FKBP8 isoform X2 [Bubalus buba  
( 62) XP\_017905457 PREDICTED: peptidyl-prolyl cis-trans isomerase FKBP8 isoform X2 [Capra hircus  
( 63) XP\_019271923 PREDICTED: peptidyl-prolyl cis-trans isomerase FKBP8 isoform X1 [Panthera par  
( 64) XP\_008542456 PREDICTED: peptidyl-prolyl cis-trans isomerase FKBP8 isoform X2 [Equus przewa  
( 65) XP\_006186302 PREDICTED: peptidyl-prolyl cis-trans isomerase FKBP8 isoform X2 [Camelus feru  
( 66) XP\_006199114 PREDICTED: peptidyl-prolyl cis-trans isomerase FKBP8 isoform X2 [Vicugna paco  
( 67) XP\_010970466 PREDICTED: peptidyl-prolyl cis-trans isomerase FKBP8 isoform X2 [Camelus bact  
( 68) XP\_024416679 peptidyl-prolyl cis-trans isomerase FKBP8 isoform X2 [Desmodus rotundus].  
( 69) XP\_005652984 peptidyl-prolyl cis-trans isomerase FKBP8 isoform X2 [Sus scrofa].  
( 70) XP\_014687059 PREDICTED: peptidyl-prolyl cis-trans isomerase FKBP8 isoform X2 [Equus asinus  
( 71) XP\_015344756 PREDICTED: peptidyl-prolyl cis-trans isomerase FKBP8 isoform X1 [Marmota marm  
( 72) XP\_012299010 peptidyl-prolyl cis-trans isomerase FKBP8 isoform X1 [Aotus nancymaeae].  
( 73) XP\_019819388 PREDICTED: peptidyl-prolyl cis-trans isomerase FKBP8 isoform X2 [Bos indicus]  
( 74) ELW67147 peptidyl-prolyl cis-trans isomerase FKBP8 [Tupaia chinensis].  
( 75) XP\_005873908 PREDICTED: peptidyl-prolyl cis-trans isomerase FKBP8 isoform X2 [Myotis brand  
( 76) XP\_016066229 PREDICTED: peptidyl-prolyl cis-trans isomerase FKBP8 isoform X1 [Miniopterus  
( 77) XP\_008154611 PREDICTED: peptidyl-prolyl cis-trans isomerase FKBP8 isoform X1 [Eptesicus fu  
( 78) XP\_020740155 peptidyl-prolyl cis-trans isomerase FKBP8 isoform X2 [Odocoileus virginianus  
( 79) XP\_003982130 peptidyl-prolyl cis-trans isomerase FKBP8 isoform X1 [Felis catus].  
( 80) XP\_019271924 PREDICTED: peptidyl-prolyl cis-trans isomerase FKBP8 isoform X2 [Panthera par  
( 81) XP\_007088416 PREDICTED: peptidyl-prolyl cis-trans isomerase FKBP8 isoform X1 [Panthera tig  
( 82) XP\_541935 peptidyl-prolyl cis-trans isomerase FKBP8 isoform X1 [Canis lupus familiaris]

( 83) XP\_012419293 PREDICTED: peptidyl-prolyl cis-trans isomerase FKBP8 isoform X2 [Odobenus ros  
( 84) XP\_004688664 PREDICTED: peptidyl-prolyl cis-trans isomerase FKBP8 isoform X2 [Condylura cr  
( 85) XP\_015413208 PREDICTED: peptidyl-prolyl cis-trans isomerase FKBP8 isoform X1 [Myotis david  
( 86) XP\_006747423 PREDICTED: peptidyl-prolyl cis-trans isomerase FKBP8 [Leptonychotes weddellii  
( 87) XP\_017905455 PREDICTED: peptidyl-prolyl cis-trans isomerase FKBP8 isoform X1 [Capra hircus  
( 88) XP\_010993437 PREDICTED: LOW QUALITY PROTEIN: peptidyl-prolyl cis-trans isomerase FKBP8 [Ca  
( 89) XP\_006058026 PREDICTED: peptidyl-prolyl cis-trans isomerase FKBP8 isoform X3 [Bubalus bub  
( 90) XP\_014921065 PREDICTED: peptidyl-prolyl cis-trans isomerase FKBP8 isoform X1 [Acinonyx jub  
( 91) XP\_006058024 PREDICTED: peptidyl-prolyl cis-trans isomerase FKBP8 isoform X1 [Bubalus bub  
( 92) XP\_001503379 peptidyl-prolyl cis-trans isomerase FKBP8 isoform X1 [Equus caballus].  
( 93) XP\_005972345 PREDICTED: peptidyl-prolyl cis-trans isomerase FKBP8 isoform X1 [Pantholops h  
( 94) XP\_019271926 PREDICTED: peptidyl-prolyl cis-trans isomerase FKBP8 isoform X4 [Panthera par  
( 95) XP\_006186301 PREDICTED: peptidyl-prolyl cis-trans isomerase FKBP8 isoform X1 [Camelus feru  
( 96) XP\_006199113 PREDICTED: peptidyl-prolyl cis-trans isomerase FKBP8 isoform X1 [Vicugna paco  
( 97) XP\_010970465 PREDICTED: peptidyl-prolyl cis-trans isomerase FKBP8 isoform X1 [Camelus bact  
( 98) XP\_003123564 peptidyl-prolyl cis-trans isomerase FKBP8 isoform X1 [Sus scrofa].  
( 99) XP\_024416678 peptidyl-prolyl cis-trans isomerase FKBP8 isoform X1 [Desmodus rotundus].  
(100) NP\_001192650 peptidyl-prolyl cis-trans isomerase FKBP8 [Bos taurus].  
(101) XP\_020740157 peptidyl-prolyl cis-trans isomerase FKBP8 isoform X4 [Odocoileus virginianus  
(102) XP\_015344757 PREDICTED: peptidyl-prolyl cis-trans isomerase FKBP8 isoform X2 [Marmota marm  
(103) XP\_006147177 PREDICTED: peptidyl-prolyl cis-trans isomerase FKBP8 [Tupaia chinensis].  
(104) XP\_020740156 peptidyl-prolyl cis-trans isomerase FKBP8 isoform X3 [Odocoileus virginianus  
(105) XP\_014687058 PREDICTED: peptidyl-prolyl cis-trans isomerase FKBP8 isoform X1 [Equus asinus  
(106) XP\_004404706 PREDICTED: peptidyl-prolyl cis-trans isomerase FKBP8 isoform X1 [Odobenus ros  
(107) XP\_019819387 PREDICTED: peptidyl-prolyl cis-trans isomerase FKBP8 isoform X1 [Bos indicus]  
(108) XP\_020008573 LOW QUALITY PROTEIN: peptidyl-prolyl cis-trans isomerase FKBP8 [Castor canad  
(109) XP\_007116995 peptidyl-prolyl cis-trans isomerase FKBP8 isoform X2 [Physeter catodon].  
(110) XP\_024622992 peptidyl-prolyl cis-trans isomerase FKBP8 isoform X2 [Neophocaena asiaeorient  
(111) XP\_012391225 PREDICTED: peptidyl-prolyl cis-trans isomerase FKBP8 isoform X1 [Orcinus orca  
(112) XP\_020740154 peptidyl-prolyl cis-trans isomerase FKBP8 isoform X1 [Odocoileus virginianus  
(113) XP\_022414296 peptidyl-prolyl cis-trans isomerase FKBP8 isoform X4 [Delphinapterus leucas].  
(114) XP\_021587090 peptidyl-prolyl cis-trans isomerase FKBP8 [Ictidomys tridecemlineatus].  
(115) XP\_019592316 PREDICTED: peptidyl-prolyl cis-trans isomerase FKBP8 isoform X1 [Rhinolophus  
(116) XP\_023989754 peptidyl-prolyl cis-trans isomerase FKBP8 isoform X1 [Physeter catodon].  
(117) XP\_024622991 peptidyl-prolyl cis-trans isomerase FKBP8 isoform X1 [Neophocaena asiaeorient  
(118) XP\_004277581 PREDICTED: peptidyl-prolyl cis-trans isomerase FKBP8 isoform X2 [Orcinus orca  
(119) XP\_017651479 PREDICTED: peptidyl-prolyl cis-trans isomerase FKBP8 isoform X4 [Nannospalax  
(120) XP\_022414295 peptidyl-prolyl cis-trans isomerase FKBP8 isoform X3 [Delphinapterus leucas].  
(121) XP\_017651477 PREDICTED: peptidyl-prolyl cis-trans isomerase FKBP8 isoform X2 [Nannospalax  
(122) XP\_007461122 PREDICTED: peptidyl-prolyl cis-trans isomerase FKBP8 [Lipotes vexillifer].  
(123) XP\_007195521 PREDICTED: peptidyl-prolyl cis-trans isomerase FKBP8 [Balaenoptera acutostr  
(124) XP\_019592317 PREDICTED: peptidyl-prolyl cis-trans isomerase FKBP8 isoform X2 [Rhinolophus

(125) XP\_005001666 peptidyl-prolyl cis-trans isomerase FKBP8 isoform X2 [Cavia porcellus].  
 (126) XP\_008822765 PREDICTED: peptidyl-prolyl cis-trans isomerase FKBP8 isoform X3 [Nannospalax  
 (127) XP\_017651474 PREDICTED: peptidyl-prolyl cis-trans isomerase FKBP8 isoform X1 [Nannospalax  
 (128) XP\_013002970 peptidyl-prolyl cis-trans isomerase FKBP8 isoform X1 [Cavia porcellus].  
 (129) XP\_012924198 peptidyl-prolyl cis-trans isomerase FKBP8 isoform X2 [Heterocephalus glaber].  
 (130) EHB02679 FK506-binding protein 8 [Heterocephalus glaber].  
 (131) XP\_012924197 peptidyl-prolyl cis-trans isomerase FKBP8 isoform X1 [Heterocephalus glaber].  
 (132) XP\_021535026 peptidyl-prolyl cis-trans isomerase FKBP8 [Neomonachus schauinslandi].  
 (133) XP\_007943554 PREDICTED: peptidyl-prolyl cis-trans isomerase FKBP8 isoform X1 [Orycterus  
 (134) XP\_011220551 PREDICTED: peptidyl-prolyl cis-trans isomerase FKBP8 isoform X1 [Ailuropoda m  
 (135) XP\_008588853 PREDICTED: peptidyl-prolyl cis-trans isomerase FKBP8 [Galeopterus variegatus]  
 (136) XP\_012916132 PREDICTED: peptidyl-prolyl cis-trans isomerase FKBP8 isoform X1 [Mustela puto  
 (137) XP\_022353384 peptidyl-prolyl cis-trans isomerase FKBP8 isoform X2 [Enhydra lutris kenyoni]  
 (138) XP\_008048663 peptidyl-prolyl cis-trans isomerase FKBP8 isoform X2 [Carlito syrichta].  
 (139) XP\_019652974 PREDICTED: peptidyl-prolyl cis-trans isomerase FKBP8 isoform X2 [Ailuropoda m  
 (140) XP\_008702161 PREDICTED: peptidyl-prolyl cis-trans isomerase FKBP8 [Ursus maritimus].  
 (141) XP\_019497623 PREDICTED: peptidyl-prolyl cis-trans isomerase FKBP8 isoform X1 [Hipposideros  
 (142) XP\_007943555 PREDICTED: peptidyl-prolyl cis-trans isomerase FKBP8 isoform X2 [Orycterus  
 (143) XP\_002912777 PREDICTED: peptidyl-prolyl cis-trans isomerase FKBP8 isoform X3 [Ailuropoda m  
 (144) EFB19124 hypothetical protein PANDA\_000557, partial [Ailuropoda melanoleuca].  
 (145) XP\_013362739 PREDICTED: peptidyl-prolyl cis-trans isomerase FKBP8 isoform X2 [Chinchilla l  
 (146) XP\_006876371 PREDICTED: peptidyl-prolyl cis-trans isomerase FKBP8 isoform X2 [Chrysochlori  
 (147) XP\_021493693 peptidyl-prolyl cis-trans isomerase FKBP8 isoform X2 [Meriones unguiculatus].  
 (148) XP\_022353383 peptidyl-prolyl cis-trans isomerase FKBP8 isoform X1 [Enhydra lutris kenyoni]  
 (149) NP\_001272500 peptidyl-prolyl cis-trans isomerase FKBP8 [Capra hircus].  
 (150) XP\_012916133 PREDICTED: peptidyl-prolyl cis-trans isomerase FKBP8 isoform X2 [Mustela puto  
 (151) XP\_011365085 peptidyl-prolyl cis-trans isomerase FKBP8 isoform X2 [Pteropus vampyrus].  
 (152) XP\_006885938 PREDICTED: peptidyl-prolyl cis-trans isomerase FKBP8 isoform X1 [Elephantulus  
 (153) XP\_004423006 PREDICTED: peptidyl-prolyl cis-trans isomerase FKBP8 isoform X2 [Ceratotheriu  
 (154) XP\_012413338 peptidyl-prolyl cis-trans isomerase FKBP8 isoform X2 [Trichechus manatus lati  
 (155) XP\_010591524 peptidyl-prolyl cis-trans isomerase FKBP8 isoform X2 [Loxodonta africana].  
 (156) XP\_008048662 peptidyl-prolyl cis-trans isomerase FKBP8 isoform X1 [Carlito syrichta].  
 (157) XP\_015987916 PREDICTED: peptidyl-prolyl cis-trans isomerase FKBP8 isoform X1 [Rousettus ae  
 (158) XP\_004666075 PREDICTED: peptidyl-prolyl cis-trans isomerase FKBP8 isoform X2 [Jaculus jacu  
 (159) XP\_019497624 PREDICTED: peptidyl-prolyl cis-trans isomerase FKBP8 isoform X2 [Hipposideros  
 (160) XP\_004649071 LOW QUALITY PROTEIN: peptidyl-prolyl cis-trans isomerase FKBP8 [Octodon degus  
 (161) APD32922 Fkbp8 [Castor fiber].  
 (162) XP\_013362738 PREDICTED: peptidyl-prolyl cis-trans isomerase FKBP8 isoform X1 [Chinchilla l  
 (163) XP\_012509480 PREDICTED: peptidyl-prolyl cis-trans isomerase FKBP8 [Propithecus coquereli].  
 (164) NP\_034353 peptidyl-prolyl cis-trans isomerase FKBP8 isoform b [Mus musculus].  
 (165) XP\_021074830 peptidyl-prolyl cis-trans isomerase FKBP8 isoform X2 [Mus pahari].  
 (166) XP\_006876370 PREDICTED: peptidyl-prolyl cis-trans isomerase FKBP8 isoform X1 [Chrysochlori

(167) XP\_021493691 peptidyl-prolyl cis-trans isomerase FKBP8 isoform X1 [Meriones unguiculatus].  
 (168) XP\_006904374 peptidyl-prolyl cis-trans isomerase FKBP8 isoform X1 [Pteropus alecto].  
 (169) XP\_006989222 PREDICTED: peptidyl-prolyl cis-trans isomerase FKBP8 isoform X2 [Peromyscus m  
 (170) XP\_004423005 PREDICTED: peptidyl-prolyl cis-trans isomerase FKBP8 isoform X3 [Ceratothieriu  
 (171) XP\_006885939 PREDICTED: peptidyl-prolyl cis-trans isomerase FKBP8 isoform X2 [Elephantulus  
 (172) XP\_004666073 PREDICTED: peptidyl-prolyl cis-trans isomerase FKBP8 isoform X1 [Jaculus jacu  
 (173) ELK19193 FK506-binding protein 8 [Pteropus alecto].  
 (174) XP\_003499206 PREDICTED: peptidyl-prolyl cis-trans isomerase FKBP8 isoform X2 [Cricetulus g  
 (175) XP\_014637207 PREDICTED: peptidyl-prolyl cis-trans isomerase FKBP8 isoform X1 [Ceratotheriu  
 (176) XP\_012790031 PREDICTED: peptidyl-prolyl cis-trans isomerase FKBP8 isoform X1 [Sorex araneu  
 (177) XP\_003413066 peptidyl-prolyl cis-trans isomerase FKBP8 isoform X1 [Loxodonta africana].  
 (178) XP\_004384434 peptidyl-prolyl cis-trans isomerase FKBP8 isoform X1 [Trichechus manatus lati  
 (179) XP\_015987917 PREDICTED: peptidyl-prolyl cis-trans isomerase FKBP8 isoform X2 [Rousettus ae  
 (180) XP\_021078721 peptidyl-prolyl cis-trans isomerase FKBP8 [Mesocricetus auratus].  
 (181) 5MGX\_E Chain E, Peptidyl-prolyl Cis-trans Isomerase Fkbp8.  
 (182) XP\_017168055 PREDICTED: peptidyl-prolyl cis-trans isomerase FKBP8 isoform X2 [Mus musculus  
 (183) NP\_001032257 peptidyl-prolyl cis-trans isomerase FKBP8 [Rattus norvegicus].  
 (184) XP\_004595597 PREDICTED: peptidyl-prolyl cis-trans isomerase FKBP8 isoform X2 [Ochotona pri  
 (185) XP\_017529992 PREDICTED: peptidyl-prolyl cis-trans isomerase FKBP8 isoform X2 [Manis javani  
 (186) XP\_005370624 PREDICTED: peptidyl-prolyl cis-trans isomerase FKBP8 isoform X2 [Microtus och  
 (187) NP\_001104536 peptidyl-prolyl cis-trans isomerase FKBP8 isoform a [Mus musculus].  
 (188) XP\_021074828 peptidyl-prolyl cis-trans isomerase FKBP8 isoform X1 [Mus paharii].  
 (189) XP\_012664880 peptidyl-prolyl cis-trans isomerase FKBP8 isoform X2 [Otolemur garnettii].  
 (190) XP\_006989221 PREDICTED: peptidyl-prolyl cis-trans isomerase FKBP8 isoform X1 [Peromyscus m  
 (191) XP\_007635977 PREDICTED: peptidyl-prolyl cis-trans isomerase FKBP8 isoform X1 [Cricetulus g  
 (192) XP\_004616706 PREDICTED: peptidyl-prolyl cis-trans isomerase FKBP8 isoform X2 [Sorex araneu  
 (193) XP\_012664879 peptidyl-prolyl cis-trans isomerase FKBP8 isoform X1 [Otolemur garnettii].  
 (194) XP\_004705311 PREDICTED: peptidyl-prolyl cis-trans isomerase FKBP8 isoform X2 [Echinops tel  
 (195) XP\_017168054 PREDICTED: peptidyl-prolyl cis-trans isomerase FKBP8 isoform X1 [Mus musculus  
 (196) XP\_021026690 peptidyl-prolyl cis-trans isomerase FKBP8 isoform X2 [Mus caroli].  
 (197) XP\_004595596 PREDICTED: peptidyl-prolyl cis-trans isomerase FKBP8 isoform X1 [Ochotona pri  
 (198) XP\_017529990 PREDICTED: peptidyl-prolyl cis-trans isomerase FKBP8 isoform X1 [Manis javani  
 (199) XP\_005370622 PREDICTED: peptidyl-prolyl cis-trans isomerase FKBP8 isoform X1 [Microtus och  
 (200) XP\_012883833 PREDICTED: peptidyl-prolyl cis-trans isomerase FKBP8 isoform X2 [Dipodomys or  
 (201) XP\_021026691 peptidyl-prolyl cis-trans isomerase FKBP8 isoform X3 [Mus caroli].  
 (202) XP\_010849455 PREDICTED: LOW QUALITY PROTEIN: peptidyl-prolyl cis-trans isomerase FKBP8-lik  
 (203) XP\_010604777 PREDICTED: peptidyl-prolyl cis-trans isomerase FKBP8 [Fukomys damarensis].  
 (204) XP\_004705310 PREDICTED: peptidyl-prolyl cis-trans isomerase FKBP8 isoform X1 [Echinops tel  
 (205) XP\_021026689 peptidyl-prolyl cis-trans isomerase FKBP8 isoform X1 [Mus caroli].  
 (206) XP\_005898381 PREDICTED: peptidyl-prolyl cis-trans isomerase FKBP8 [Bos mutus].  
 (207) XP\_012883832 PREDICTED: peptidyl-prolyl cis-trans isomerase FKBP8 isoform X1 [Dipodomys or  
 (208) XP\_024622994 peptidyl-prolyl cis-trans isomerase FKBP8 isoform X4 [Neophocaena asiaeorient

|       |              |                                                                                |
|-------|--------------|--------------------------------------------------------------------------------|
| (209) | XP_022414294 | peptidyl-prolyl cis-trans isomerase FKBP8 isoform X2 [Delphinapterus leucas].  |
| (210) | XP_007116996 | peptidyl-prolyl cis-trans isomerase FKBP8 isoform X3 [Physeter catodon].       |
| (211) | XP_024622993 | peptidyl-prolyl cis-trans isomerase FKBP8 isoform X3 [Neophocaena asiaeorient  |
| (212) | XP_022414293 | peptidyl-prolyl cis-trans isomerase FKBP8 isoform X1 [Delphinapterus leucas].  |
| (213) | XP_023055022 | peptidyl-prolyl cis-trans isomerase FKBP8, partial [Piliocolobus tephroscelus  |
| (214) | ELR54589     | peptidyl-prolyl cis-trans isomerase FKBP8 [Bos mutus].                         |
| (215) | XP_010845609 | PREDICTED: peptidyl-prolyl cis-trans isomerase FKBP8 [Bison bison bison].      |
| (216) | XP_021538869 | peptidyl-prolyl cis-trans isomerase FKBP8 [Neomonachus schauinslandi].         |
| (217) | KFO22602     | peptidyl-prolyl cis-trans isomerase FKBP8 [Fukomys damarensis].                |
| (218) | 2MF9_A       | Chain A, Peptidyl-prolyl cis-trans isomerase FKBP8.                            |
| (219) | PN150452     | FKBP8 isoform 11, partial [Pan troglodytes].                                   |
| (220) | PNJ28404     | FKBP8 isoform 11, partial [Pongo abelii].                                      |
| (221) | XP_007533227 | PREDICTED: peptidyl-prolyl cis-trans isomerase FKBP8 [Erinaceus europaeus].    |
| (222) | XP_020864537 | peptidyl-prolyl cis-trans isomerase FKBP8 [Phascolarctos cinereus].            |
| (223) | XP_012397649 | peptidyl-prolyl cis-trans isomerase FKBP8 [Sarcophilus harrisii].              |
| (224) | XP_001369403 | PREDICTED: peptidyl-prolyl cis-trans isomerase FKBP8 [Monodelphis domestica].  |
| (225) | 2F2D_A       | Chain A, kDa FK-506 binding protein homolog, FKBP38.                           |
| (226) | 2D9F_A       | Chain A, FK506-binding protein 8 variant.                                      |
| (227) | XP_015668943 | PREDICTED: peptidyl-prolyl cis-trans isomerase FKBP8 isoform X2 [Protobothrop  |
| (228) | 2AWG_A       | Chain A, Structure Of The Ppiase Domain Of The Human Fk506-Binding Protein 8.  |
| (229) | XP_015668942 | PREDICTED: peptidyl-prolyl cis-trans isomerase FKBP8 isoform X1 [Protobothrop  |
| (230) | XP_025032464 | peptidyl-prolyl cis-trans isomerase FKBP8 isoform X2 [Python bivittatus].      |
| (231) | XP_007443923 | peptidyl-prolyl cis-trans isomerase FKBP8 isoform X1 [Python bivittatus].      |
| (232) | KEV73372     | peptidyl-prolyl cis-trans isomerase FKBP8, partial [Struthio camelus australi  |
| (233) | OXB56359     | hypothetical protein ASZ78_001767 [Callipepla squamata].                       |
| (234) | XP_009675861 | PREDICTED: peptidyl-prolyl cis-trans isomerase FKBP8 [Struthio camelus austr   |
| (235) | OXB73131     | hypothetical protein H35_012056 [Colinus virginianus].                         |
| (236) | XP_010723402 | PREDICTED: peptidyl-prolyl cis-trans isomerase FKBP8, partial [Meleagris gall  |
| (237) | KEV67807     | peptidyl-prolyl cis-trans isomerase FKBP8, partial [Picoides pubescens].       |
| (238) | XP_010304001 | PREDICTED: peptidyl-prolyl cis-trans isomerase FKBP8, partial [Balearica regu  |
| (239) | NP_001241668 | peptidyl-prolyl cis-trans isomerase FKBP8 [Gallus gallus].                     |
| (240) | KFO03599     | peptidyl-prolyl cis-trans isomerase FKBP8, partial [Balearica regulorum gibbe  |
| (241) | XP_021234495 | peptidyl-prolyl cis-trans isomerase FKBP8 isoform X1 [Numida meleagris].       |
| (242) | POI29828     | hypothetical protein CIB84_006422 [Bambusicola thoracicus].                    |
| (243) | XP_021234496 | peptidyl-prolyl cis-trans isomerase FKBP8 isoform X2 [Numida meleagris].       |
| (244) | XP_023963943 | peptidyl-prolyl cis-trans isomerase FKBP8 [Chrysemys picta bellii].            |
| (245) | XP_014793985 | PREDICTED: peptidyl-prolyl cis-trans isomerase FKBP8 [Calidris pugnax].        |
| (246) | XP_009899401 | PREDICTED: peptidyl-prolyl cis-trans isomerase FKBP8 [Picoides pubescens].     |
| (247) | XP_015742210 | PREDICTED: peptidyl-prolyl cis-trans isomerase FKBP8 isoform X2 [Coturnix jap  |
| (248) | XP_009641057 | PREDICTED: peptidyl-prolyl cis-trans isomerase FKBP8, partial [Egretta garzeta |
| (249) | KFP19261     | peptidyl-prolyl cis-trans isomerase FKBP8, partial [Egretta garzeta].          |
| (250) | XP_024065593 | peptidyl-prolyl cis-trans isomerase FKBP8-like [Terrapene mexicana triunguis]  |

|       |              |                                                                                      |
|-------|--------------|--------------------------------------------------------------------------------------|
| (251) | XP_011594878 | PREDICTED: peptidyl-prolyl cis-trans isomerase FKBP8 [Aquila chrysaetos canad        |
| (252) | XP_014742726 | PREDICTED: peptidyl-prolyl cis-trans isomerase FKBP8 isoform X2 [Sturnus vulg        |
| (253) | XP_015742208 | PREDICTED: peptidyl-prolyl cis-trans isomerase FKBP8 isoform X1 [Coturnix jap        |
| (254) | XP_019369180 | PREDICTED: peptidyl-prolyl cis-trans isomerase FKBP8 [Gavialis gangeticus].          |
| (255) | XP_010561556 | PREDICTED: peptidyl-prolyl cis-trans isomerase FKBP8 [Haliaeetus leucocephalu        |
| (256) | XP_008638175 | PREDICTED: peptidyl-prolyl cis-trans isomerase FKBP8, partial [Corvus brachyr        |
| (257) | XP_002195923 | PREDICTED: peptidyl-prolyl cis-trans isomerase FKBP8 [Taeniopygia guttata].          |
| (258) | XP_015266773 | PREDICTED: peptidyl-prolyl cis-trans isomerase FKBP8 [Gekko japonicus].              |
| (259) | XP_005505599 | PREDICTED: peptidyl-prolyl cis-trans isomerase FKBP8 [Pseudopodoces humilis].        |
| (260) | XP_014115778 | PREDICTED: peptidyl-prolyl cis-trans isomerase FKBP8 isoform X1 [Sturnus vulg        |
| (261) | XP_014742725 | PREDICTED: peptidyl-prolyl cis-trans isomerase FKBP8 isoform X1 [Sturnus vulg        |
| (262) | XP_018780521 | PREDICTED: LOW QUALITY PROTEIN: peptidyl-prolyl cis-trans isomerase FKBP8 [Se        |
| (263) | XP_005235043 | PREDICTED: peptidyl-prolyl cis-trans isomerase FKBP8 isoform X2 [Falco peregr        |
| (264) | OPJ86694     | PREDICTED: peptidyl-prolyl cis-trans isomerase FKBP8 [Patagioenas fasciata monilis]. |
| (265) | XP_019341692 | PREDICTED: peptidyl-prolyl cis-trans isomerase FKBP8 isoform X2 [Alligator mi        |
| (266) | XP_021400798 | PREDICTED: peptidyl-prolyl cis-trans isomerase FKBP8 [Lonchura striata domestica].   |
| (267) | XP_006028906 | peptidyl-prolyl cis-trans isomerase FKBP8 [Alligator sinensis].                      |
| (268) | KFQ97904     | peptidyl-prolyl cis-trans isomerase FKBP8, partial [Nipponia nippon].                |
| (269) | XP_015507158 | PREDICTED: peptidyl-prolyl cis-trans isomerase FKBP8 isoform X2 [Parus major]        |
| (270) | KFW12711     | peptidyl-prolyl cis-trans isomerase FKBP8, partial [Eurypyga helias].                |
| (271) | XP_006271082 | PREDICTED: peptidyl-prolyl cis-trans isomerase FKBP8 isoform X1 [Alligator mi        |
| (272) | KFO81655     | peptidyl-prolyl cis-trans isomerase FKBP8, partial [Cuculus canorus].                |
| (273) | XP_007072098 | PREDICTED: peptidyl-prolyl cis-trans isomerase FKBP8, partial [Chelonia mydas        |
| (274) | XP_020669929 | peptidyl-prolyl cis-trans isomerase FKBP8 isoform X1 [Pogona vitticeps].             |
| (275) | XP_009464539 | PREDICTED: peptidyl-prolyl cis-trans isomerase FKBP8 [Nipponia nippon].              |
| (276) | XP_010158039 | PREDICTED: peptidyl-prolyl cis-trans isomerase FKBP8, partial [Eurypyga helia        |
| (277) | XP_019149030 | peptidyl-prolyl cis-trans isomerase FKBP8, partial [Corvus cornix cornix].           |
| (278) | XP_020669930 | peptidyl-prolyl cis-trans isomerase FKBP8 isoform X2 [Pogona vitticeps].             |
| (279) | XP_019393900 | PREDICTED: peptidyl-prolyl cis-trans isomerase FKBP8 [Crocodylus porosus].           |
| (280) | EMP24085     | peptidyl-prolyl cis-trans isomerase FKBP8 [Chelonia mydas].                          |
| (281) | XP_009566597 | PREDICTED: peptidyl-prolyl cis-trans isomerase FKBP8 [Cuculus canorus].              |
| (282) | KFW65305     | peptidyl-prolyl cis-trans isomerase FKBP8, partial [Pygoscelis adeliae].             |
| (283) | XP_015507157 | PREDICTED: peptidyl-prolyl cis-trans isomerase FKBP8 isoform X1 [Parus major]        |
| (284) | XP_013799130 | PREDICTED: peptidyl-prolyl cis-trans isomerase FKBP8 [Apteryx australis mante        |
| (285) | XP_014433658 | peptidyl-prolyl cis-trans isomerase FKBP8 [Pelodiscus sinensis].                     |
| (286) | XP_009319696 | PREDICTED: peptidyl-prolyl cis-trans isomerase FKBP8, partial [Pygoscelis ade        |
| (287) | KFQ36923     | peptidyl-prolyl cis-trans isomerase FKBP8, partial [Mesitornis unicolor].            |
| (288) | XP_005060257 | PREDICTED: peptidyl-prolyl cis-trans isomerase FKBP8 [Ficedula albicollis].          |
| (289) | KFU87694     | peptidyl-prolyl cis-trans isomerase FKBP8, partial [Chaetura pelagica].              |
| (290) | XP_005139681 | PREDICTED: peptidyl-prolyl cis-trans isomerase FKBP8 [Melopsittacus undulatus        |
| (291) | XP_009993397 | PREDICTED: peptidyl-prolyl cis-trans isomerase FKBP8 [Chaetura pelagica].            |
| (292) | AAH84415     | LOC495188 protein, partial [Xenopus laevis].                                         |

(293) KQL50954  
(294) NP\_001088346  
(295) XP\_013913386  
(296) KFO13009  
(297) KFO75436  
(298) KFP56346  
(299) KFM07869  
(300) XP\_018096952  
(301) KFP65829  
(302) XP\_023803625  
(303) XP\_009951725  
(304) NP\_001120570  
(305) KFP23912  
(306) XP\_010073720  
(307) KGL86304  
(308) KFOV08597  
(309) KFW76752  
(310) XP\_009700019  
(311) XP\_010208130  
(312) KFO81502  
(313) XP\_017938939  
(314) KFP70760  
(315) XP\_009880959  
(316) XP\_010292010  
(317) XP\_009076312  
(318) XP\_018412986  
(319) XP\_022525503  
(320) XP\_021459512  
(321) XP\_021459510  
(322) XP\_024277334  
(323) XP\_024277330  
(324) XP\_024277333  
(325) XP\_009512288  
(326) XP\_020354512  
(327) KFFZ50883  
(328) KFW81721  
(329) CDQ57258  
(330) XP\_020354513  
(331) XP\_020487811  
(332) XP\_024277331  
(333) XP\_014071869  
(334) XP\_011472153

peptidyl-prolyl cis-trans isomerase FKBP8 [Amazona aestiva].  
FK506 binding protein 8 L homeolog [Xenopus laevis].  
PREDICTED: peptidyl-prolyl cis-trans isomerase FKBP8 [Thamnomphis sirtalis].  
peptidyl-prolyl cis-trans isomerase FKBP8, partial [Leptosomus discolor].  
peptidyl-prolyl cis-trans isomerase FKBP8, partial [Phoenicopterus ruber rube  
peptidyl-prolyl cis-trans isomerase FKBP8, partial [Cathartes aura].  
peptidyl-prolyl cis-trans isomerase FKBP8, partial [Aptenodytes forsteri].  
PREDICTED: peptidyl-prolyl cis-trans isomerase FKBP8-like [Xenopus laevis].  
peptidyl-prolyl cis-trans isomerase FKBP8, partial [Cariama cristata].  
peptidyl-prolyl cis-trans isomerase FKBP8, partial [Cyanistes caeruleus].  
PREDICTED: peptidyl-prolyl cis-trans isomerase FKBP8, partial [Leptosomus dis  
peptidyl-prolyl cis-trans isomerase FKBP8 [Xenopus tropicalis].  
peptidyl-prolyl cis-trans isomerase FKBP8, partial [Colius striatus].  
PREDICTED: peptidyl-prolyl cis-trans isomerase FKBP8, partial [Pterocles gutt  
peptidyl-prolyl cis-trans isomerase FKBP8, partial [Charadrius vociferus].  
peptidyl-prolyl cis-trans isomerase FKBP8, partial [Pterocles gutturalis].  
peptidyl-prolyl cis-trans isomerase FKBP8, partial [Manacus vitellinus].  
PREDICTED: peptidyl-prolyl cis-trans isomerase FKBP8, partial [Cariama crista  
PREDICTED: peptidyl-prolyl cis-trans isomerase FKBP8, partial [Colius striatu  
peptidyl-prolyl cis-trans isomerase FKBP8, partial [Phaethon lepturus].  
PREDICTED: LOW QUALITY PROTEIN: peptidyl-prolyl cis-trans isomerase FKBP8, pa  
peptidyl-prolyl cis-trans isomerase FKBP8, partial [Acanthisitta chloris].  
PREDICTED: peptidyl-prolyl cis-trans isomerase FKBP8 [Charadrius vociferus].  
PREDICTED: peptidyl-prolyl cis-trans isomerase FKBP8, partial [Phaethon leptu  
PREDICTED: peptidyl-prolyl cis-trans isomerase FKBP8, partial [Acanthisitta c  
peptidyl-prolyl cis-trans isomerase FKBP8 [Nanorana parkeri].  
peptidyl-prolyl cis-trans isomerase FKBP8 [Astyanax mexicanus].  
peptidyl-prolyl cis-trans isomerase FKBP8-like isoform X2 [Oncorhynchus mykiss  
peptidyl-prolyl cis-trans isomerase FKBP8-like isoform X1 [Oncorhynchus mykiss  
peptidyl-prolyl cis-trans isomerase FKBP8-like isoform X4 [Oncorhynchus tshaw  
peptidyl-prolyl cis-trans isomerase FKBP8-like isoform X1 [Oncorhynchus tshaw  
peptidyl-prolyl cis-trans isomerase FKBP8-like isoform X3 [Oncorhynchus tshaw  
PREDICTED: peptidyl-prolyl cis-trans isomerase FKBP8, partial [Phalacrocorax  
peptidyl-prolyl cis-trans isomerase FKBP8-like isoform X1 [Oncorhynchus kisut  
peptidyl-prolyl cis-trans isomerase FKBP8, partial [Podiceps cristatus].  
peptidyl-prolyl cis-trans isomerase FKBP8, partial [Phalacrocorax carbo].  
unnamed protein product [Oncorhynchus mykiss].  
peptidyl-prolyl cis-trans isomerase FKBP8-like isoform X2 [Oncorhynchus kisut  
peptidyl-prolyl cis-trans isomerase FKBP8 [Labrus bergylta].  
peptidyl-prolyl cis-trans isomerase FKBP8-like isoform X2 [Oncorhynchus tshaw  
PREDICTED: peptidyl-prolyl cis-trans isomerase FKBP8-like isoform X1 [Salmo s  
peptidyl-prolyl cis-trans isomerase FKBP8 isoform X2 [Oryzias latipes].



(335) XP\_014071870 PREDICTED: peptidyl-prolyl cis-trans isomerase FKBP8-like isoform X2 [Salmo s  
 (336) XP\_024114895 peptidyl-prolyl cis-trans isomerase FKBP8 isoform X1 [Oryzias melastigma].  
 (337) XP\_024114896 peptidyl-prolyl cis-trans isomerase FKBP8 isoform X2 [Oryzias melastigma].  
 (338) ETE64390 peptidyl-prolyl cis-trans isomerase FKBP8, partial [Ophiophagus hannah].  
 (339) XP\_023809890 peptidyl-prolyl cis-trans isomerase FKBP8 isoform X1 [Oryzias latipes].  
 (340) XP\_008499209 PREDICTED: peptidyl-prolyl cis-trans isomerase FKBP8 [Calypte anna].  
 (341) KFP06384 Peptidyl-prolyl cis-trans isomerase FKBP8, partial [Calypte anna].  
 (342) XP\_023859426 peptidyl-prolyl cis-trans isomerase FKBP8 isoform X3 [Salvelinus alpinus].  
 (343) XP\_023859424 peptidyl-prolyl cis-trans isomerase FKBP8 isoform X2 [Salvelinus alpinus].  
 (344) XP\_023859423 peptidyl-prolyl cis-trans isomerase FKBP8 isoform X1 [Salvelinus alpinus].  
 (345) XP\_021454666 peptidyl-prolyl cis-trans isomerase FKBP8-like [Oncorhynchus mykiss].  
 (346) XP\_017572299 PREDICTED: peptidyl-prolyl cis-trans isomerase FKBP8 [Pygocentrus nattereri].  
 (347) CDQ97962 unnamed protein product [Oncorhynchus mykiss].  
 (348) XP\_023854736 peptidyl-prolyl cis-trans isomerase FKBP8 isoform X2 [Salvelinus alpinus].  
 (349) XP\_018920592 PREDICTED: peptidyl-prolyl cis-trans isomerase FKBP8 [Cyprinus carpio].  
 (350) NP\_001133417 peptidyl-prolyl cis-trans isomerase FKBP8 [Salmo salar].  
 (351) XP\_023854735 peptidyl-prolyl cis-trans isomerase FKBP8 isoform X1 [Salvelinus alpinus].  
 (352) XP\_024258320 peptidyl-prolyl cis-trans isomerase FKBP8-like [Oncorhynchus tshawytscha].  
 (353) AA152651 FK506 binding protein 8 [Danio rerio].  
 (354) XP\_020348060 peptidyl-prolyl cis-trans isomerase FKBP8-like [Oncorhynchus kisutch].  
 (355) NP\_9571178 peptidyl-prolyl cis-trans isomerase FKBP8 [Danio rerio].  
 (356) XP\_005932512 PREDICTED: peptidyl-prolyl cis-trans isomerase FKBP8 [Haplochromis burtoni].  
 (357) XP\_013860095 PREDICTED: peptidyl-prolyl cis-trans isomerase FKBP8 [Austrofundulus limnaeus  
 (358) PWA20923 hypothetical protein CCH79\_00007271, partial [Gambusia affinis].  
 (359) XP\_005727139 PREDICTED: peptidyl-prolyl cis-trans isomerase FKBP8 [Pundamilia nyererei].  
 (360) XP\_006790401 PREDICTED: peptidyl-prolyl cis-trans isomerase FKBP8-like [Neolamprologus bri  
 (361) XP\_019207270 PREDICTED: peptidyl-prolyl cis-trans isomerase FKBP8 [Oreochromis niloticus].  
 (362) XP\_024654530 peptidyl-prolyl cis-trans isomerase FKBP8 [Maylandia zebra].  
 (363) XP\_007897075 PREDICTED: peptidyl-prolyl cis-trans isomerase FKBP8 [Callorhynchus milii].  
 (364) XP\_010870009 PREDICTED: peptidyl-prolyl cis-trans isomerase FKBP8 isoform X2 [Esox lucius]  
 (365) XP\_022615368 peptidyl-prolyl cis-trans isomerase FKBP8 [Seriola dumerilii].  
 (366) XP\_010870008 PREDICTED: peptidyl-prolyl cis-trans isomerase FKBP8 isoform X1 [Esox lucius]  
 (367) XP\_005795669 peptidyl-prolyl cis-trans isomerase FKBP8 [Xiphophorus maculatus].  
 (368) XP\_020391166 peptidyl-prolyl cis-trans isomerase FKBP8 isoform X2 [Rhincodon typus].  
 (369) AWP11099 putative peptidyl-prolyl cis-trans isomerase FKBP8 [Scophthalmus maximus].  
 (370) XP\_017333233 PREDICTED: peptidyl-prolyl cis-trans isomerase FKBP8 [Ictalurus punctatus].  
 (371) KTF74275 hypothetical protein cypCar\_00030593, partial [Cyprinus carpio].  
 (372) XP\_017262938 peptidyl-prolyl cis-trans isomerase FKBP8 [Kryptolebias marmoratus].  
 (373) XP\_023263872 peptidyl-prolyl cis-trans isomerase FKBP8 [Seriola lalandi dorsalis].  
 (374) XP\_020391165 peptidyl-prolyl cis-trans isomerase FKBP8 isoform X1 [Rhincodon typus].  
 (375) XP\_016327233 PREDICTED: peptidyl-prolyl cis-trans isomerase FKBP8-like [Sinocyclocheilus a  
 (376) XP\_016138463 PREDICTED: peptidyl-prolyl cis-trans isomerase FKBP8 [Sinocyclocheilus graham

(377) XP\_016356127 PREDICTED: peptidyl-prolyl cis-trans isomerase FKBP8-like [Sinocyclocheilus a  
 (378) XP\_007577281 PREDICTED: peptidyl-prolyl cis-trans isomerase FKBP8 [Poecilia formosa].  
 (379) XP\_008405333 PREDICTED: peptidyl-prolyl cis-trans isomerase FKBP8 [Poecilia reticulata].  
 (380) XP\_012715520 peptidyl-prolyl cis-trans isomerase FKBP8 [Fundulus heteroclitus].  
 (381) XP\_012695070 PREDICTED: peptidyl-prolyl cis-trans isomerase FKBP8 [Clupea harengus].  
 (382) XP\_020795782 peptidyl-prolyl cis-trans isomerase FKBP8 [Boleophthalmus pectinirostris].  
 (383) XP\_016382508 PREDICTED: peptidyl-prolyl cis-trans isomerase FKBP8-like [Sinocyclocheilus r  
 (384) XP\_018522913 PREDICTED: peptidyl-prolyl cis-trans isomerase FKBP8 [Lates calcarifer].  
 (385) XP\_008305299 peptidyl-prolyl cis-trans isomerase FKBP8 isoform X2 [Cynoglossus semilaevis]  
 (386) XP\_015238114 PREDICTED: peptidyl-prolyl cis-trans isomerase FKBP8 [Cyprinodon variegatus].  
 (387) XP\_018583793 PREDICTED: peptidyl-prolyl cis-trans isomerase FKBP8 [Scleropages formosus].  
 (388) XP\_016886204 peptidyl-prolyl cis-trans isomerase FKBP8 isoform X1 [Cynoglossus semilaevis]  
 (389) XP\_019752339 PREDICTED: peptidyl-prolyl cis-trans isomerase FKBP8 [Hippocampus comes].  
 (390) XP\_010728467 PREDICTED: peptidyl-prolyl cis-trans isomerase FKBP8 [Larimichthys crocea].  
 (391) KKF19855 peptidyl-prolyl cis-trans isomerase FKBP8 [Larimichthys crocea].  
 (392) XP\_015827013 PREDICTED: peptidyl-prolyl cis-trans isomerase FKBP8 [Nothobranchius furzeri]  
 (393) XP\_022061518 peptidyl-prolyl cis-trans isomerase FKBP8 [Acanthochromis polyacanthus].  
 (394) XP\_019936960 PREDICTED: peptidyl-prolyl cis-trans isomerase FKBP8 [Paralichthys olivaceus]  
 (395) XP\_003974097 PREDICTED: peptidyl-prolyl cis-trans isomerase FKBP8 [Takiugu rubripes].  
 (396) XP\_023699813 peptidyl-prolyl cis-trans isomerase FKBP8 isoform X2 [Paramormyrops kingsleya  
 (397) XP\_023699812 peptidyl-prolyl cis-trans isomerase FKBP8 isoform X1 [Paramormyrops kingsleya  
 (398) XP\_020478047 peptidyl-prolyl cis-trans isomerase FKBP8 isoform X3 [Monopterus albus].  
 (399) XP\_015220721 PREDICTED: peptidyl-prolyl cis-trans isomerase FKBP8 [Lepisosteus oculatus].  
 (400) XP\_023123034 peptidyl-prolyl cis-trans isomerase FKBP8 [Amphiprion ocellaris].  
 (401) XP\_020478046 peptidyl-prolyl cis-trans isomerase FKBP8 isoform X2 [Monopterus albus].  
 (402) XP\_020478045 peptidyl-prolyl cis-trans isomerase FKBP8 isoform X1 [Monopterus albus].  
 (403) XP\_008275730 PREDICTED: peptidyl-prolyl cis-trans isomerase FKBP8 [Stegastes partitus].  
 (404) XP\_010770232 PREDICTED: peptidyl-prolyl cis-trans isomerase FKBP8 [Notothenia coriiceps].  
 (405) XP\_002601637 hypothetical protein BRAFLDRAFT\_85785 [Branchiostoma floridae].  
 (406) XP\_019619553 PREDICTED: LOW QUALITY PROTEIN: peptidyl-prolyl cis-trans isomerase FKBP8-lik  
 (407) XP\_006814126 PREDICTED: peptidyl-prolyl cis-trans isomerase FKBP8-like [Saccoglossus kowal  
 (408) XP\_006629043 PREDICTED: peptidyl-prolyl cis-trans isomerase FKBP8-like [Lepisosteus oculat  
 (409) PVD20167 hypothetical protein C0Q70\_20661 [Pomacea canaliculata].  
 (410) XP\_023841292 peptidyl-prolyl cis-trans isomerase FKBP8-like [Salvelinus alpinus].  
 (411) XP\_008410571 PREDICTED: peptidyl-prolyl cis-trans isomerase FKBP8-like isoform X2 [Poecili  
 (412) XP\_008410568 PREDICTED: peptidyl-prolyl cis-trans isomerase FKBP8-like isoform X1 [Poecili  
 (413) XP\_022329628 peptidyl-prolyl cis-trans isomerase FKBP8-like [Crassostrea virginica].  
 (414) XP\_014897626 PREDICTED: peptidyl-prolyl cis-trans isomerase FKBP8-like isoform X2 [Poecili  
 (415) XP\_014848641 PREDICTED: peptidyl-prolyl cis-trans isomerase FKBP8-like isoform X2 [Poecili  
 (416) XP\_014848639 PREDICTED: peptidyl-prolyl cis-trans isomerase FKBP8-like isoform X1 [Poecili  
 (417) XP\_007566466 PREDICTED: peptidyl-prolyl cis-trans isomerase FKBP8-like isoform X2 [Poecili  
 (418) XP\_023180976 peptidyl-prolyl cis-trans isomerase FKBP8-like isoform X2 [Xiphophorus macula

(419) KM091381  
(420) XP\_007566465  
(421) XP\_014897625  
(422) XP\_015254615  
(423) XP\_005798327  
(424) XP\_015254612  
(425) XP\_013980328  
(426) XP\_009061784  
(427) XP\_022106769  
(428) XP\_020625955  
(429) XP\_020625956  
(430) XP\_010732628  
(431) XP\_015728921  
(432) XP\_003440659  
(433) XP\_014004032  
(434) XP\_010899928  
(435) XP\_020336380  
(436) XP\_022330049  
(437) PIK48936  
(438) XP\_020336379  
(439) XP\_022330048  
(440) XP\_007907980  
(441) XP\_013859000  
(442) XP\_019737313  
(443) XP\_021427237  
(444) XP\_023827235  
(445) XP\_023827230  
(446) XP\_008309233  
(447) XP\_024269308  
(448) XP\_002932306  
(449) XP\_022785584  
(450) XP\_008309234  
(451) XP\_013386268  
(452) XP\_005928731  
(453) XP\_002119960  
(454) XP\_024235293  
(455) XP\_005729996  
(456) XP\_018619414  
(457) XP\_012796312  
(458) XP\_004553258  
(459) CDQ72337  
(460) XP\_024269303

peptidyl-prolyl cis-trans isomerase fkbp8-like protein [Lasius niger].  
PREDICTED: peptidyl-prolyl cis-trans isomerase FKBP8-like isoform X1 [Poecili  
PREDICTED: peptidyl-prolyl cis-trans isomerase FKBP8-like isoform X1 [Poecili  
PREDICTED: peptidyl-prolyl cis-trans isomerase FKBP8-like isoform X2 [Cyprino  
peptidyl-prolyl cis-trans isomerase FKBP8-like isoform X1 [Xiphophorus macula  
PREDICTED: peptidyl-prolyl cis-trans isomerase FKBP8-like isoform X1 [Cyprino  
PREDICTED: peptidyl-prolyl cis-trans isomerase FKBP8-like isoform X1 [Cyprino  
hypothetical protein LOTGIDRAFT\_127555 [Lottia gigantea].  
peptidyl-prolyl cis-trans isomerase FKBP8-like [Acanthaster planci].  
peptidyl-prolyl cis-trans isomerase FKBP8-like isoform X1 [Orbicella faveolat  
peptidyl-prolyl cis-trans isomerase FKBP8-like isoform X2 [Orbicella faveolat  
PREDICTED: peptidyl-prolyl cis-trans isomerase FKBP8 [Larimichthys crocea].  
PREDICTED: peptidyl-prolyl cis-trans isomerase FKBP8-like [Coturnix japonica]  
PREDICTED: peptidyl-prolyl cis-trans isomerase FKBP8 [Oreochromis niloticus].  
PREDICTED: peptidyl-prolyl cis-trans isomerase FKBP8-like [Salmo salar].  
peptidyl-prolyl cis-trans isomerase FKBP8-like isoform X2 [Oncorhynchus kisut  
peptidyl-prolyl cis-trans isomerase FKBP8-like isoform X2 [Crassostrea virgin  
putative peptidyl-prolyl cis-trans isomerase FKBP8-like [Apostichopus japonic  
peptidyl-prolyl cis-trans isomerase FKBP8-like isoform X1 [Oncorhynchus kisut  
peptidyl-prolyl cis-trans isomerase FKBP8-like isoform X1 [Crassostrea virgin  
PREDICTED: peptidyl-prolyl cis-trans isomerase FKBP8-like [Callorhynchus mlii  
PREDICTED: peptidyl-prolyl cis-trans isomerase FKBP8-like [Austrofundulus lim  
PREDICTED: peptidyl-prolyl cis-trans isomerase FKBP8-like [Hippocampus comes]  
peptidyl-prolyl cis-trans isomerase FKBP8-like [Oncorhynchus mykiss].  
peptidyl-prolyl cis-trans isomerase FKBP8 isoform X2 [Salvelinus alpinus].  
peptidyl-prolyl cis-trans isomerase FKBP8 isoform X1 [Salvelinus alpinus].  
peptidyl-prolyl cis-trans isomerase FKBP8 isoform X1 [Cynoglossus semilaevis]  
peptidyl-prolyl cis-trans isomerase FKBP8-like isoform X4 [Oncorhynchus tshaw  
PREDICTED: peptidyl-prolyl cis-trans isomerase FKBP8-like [Xenopus tropicalis  
peptidyl-prolyl cis-trans isomerase FKBP8-like [Stylophora pistillata].  
peptidyl-prolyl cis-trans isomerase FKBP8 isoform X2 [Cynoglossus semilaevis]  
peptidyl-prolyl cis-trans isomerase FKBP8 [Lingula anatina].  
PREDICTED: peptidyl-prolyl cis-trans isomerase FKBP8-like [Haplochromis burto  
PREDICTED: peptidyl-prolyl cis-trans isomerase FKBP8 [Ciona intestinalis].  
peptidyl-prolyl cis-trans isomerase FKBP8-like [Oncorhynchus tshawytscha].  
PREDICTED: peptidyl-prolyl cis-trans isomerase FKBP8-like [Pundamilia nyerere  
Peptidyl-prolyl cis-trans isomerase FKBP8 [Schistosoma haematobium].  
peptidyl-prolyl cis-trans isomerase FKBP8 [Maylandia zebra].  
unnamed protein product [Oncorhynchus mykiss].  
peptidyl-prolyl cis-trans isomerase FKBP8-like isoform X2 [Oncorhynchus tshaw

(461) XP\_024269307  
(462) XP\_024269300  
(463) XP\_017893134  
(464) XP\_021454564  
(465) XP\_003967095  
(466) XP\_021454548  
(467) XP\_023697743  
(468) PIK51124  
(469) XP\_020311464  
(470) XP\_017261735  
(471) XP\_011312767  
(472) XP\_022047038  
(473) XP\_003427294  
(474) XP\_020139363  
(475) XP\_011661975  
(476) XP\_021263191  
(477) XP\_005110253  
(478) OCT89685  
(479) XP\_018106932  
(480) XP\_022609905  
(481) XP\_023278137  
(482) XP\_023151164  
(483) OON20683  
(484) XP\_014340350  
(485) XP\_012284026  
(486) OAD61952  
(487) XP\_023962949  
(488) XP\_008121023  
(489) XP\_017763036  
(490) XP\_017691650  
(491) XP\_012710521  
(492) XP\_015819997  
(493) XP\_023962948  
(494) XP\_019921720  
(495) XP\_020904887  
(496) XP\_024138547  
(497) AWP08482  
(498) CDQ67637  
(499) XP\_011423840  
(500) XP\_014808190  
(501) XP\_007059625  
(502) XP\_024138546

peptidyl-prolyl cis-trans isomerase FKBP8-like isoform X3 [Oncorhynchus tshaw  
peptidyl-prolyl cis-trans isomerase FKBP8-like isoform X1 [Oncorhynchus tshaw  
PREDICTED: peptidyl-prolyl cis-trans isomerase FKBP8 [Ceratina calcarata].  
peptidyl-prolyl cis-trans isomerase FKBP8-like isoform X2 [Oncorhynchus mykiss  
PREDICTED: peptidyl-prolyl cis-trans isomerase FKBP8-like [Takifugu rubripes]  
peptidyl-prolyl cis-trans isomerase FKBP8-like isoform X1 [Oncorhynchus mykiss  
peptidyl-prolyl cis-trans isomerase FKBP8-like [Paramormyrops kingsleyae].  
putative peptidyl-prolyl cis-trans isomerase FKBP8 [Apostichopus japonicus].  
peptidyl-prolyl cis-trans isomerase FKBP8-like [Oncorhynchus kisutch].  
peptidyl-prolyl cis-trans isomerase FKBP8-like [Kryptolebias marmoratus].  
PREDICTED: peptidyl-prolyl cis-trans isomerase FKBP8 [Fopius arisanus].  
peptidyl-prolyl cis-trans isomerase FKBP8-like [Acanthochromis polyacanthus].  
PREDICTED: peptidyl-prolyl cis-trans isomerase FKBP8 [Nasonia vitripennis].  
peptidyl-prolyl cis-trans isomerase FKBP8 [Microcebus murinus].  
PREDICTED: peptidyl-prolyl cis-trans isomerase FKBP8 [Strongylocentrotus purp  
peptidyl-prolyl cis-trans isomerase FKBP8-like isoform X2 [Numida meleagris].  
PREDICTED: peptidyl-prolyl cis-trans isomerase FKBP8-like [Aplysia californica  
hypothetical protein XELAEV\_18018304mg [Xenopus laevis].  
PREDICTED: peptidyl-prolyl cis-trans isomerase FKBP8-like [Xenopus laevis].  
peptidyl-prolyl cis-trans isomerase FKBP8-like [Seriola dumerilii].  
peptidyl-prolyl cis-trans isomerase FKBP8-like [Seriola lalandi dorsalis].  
peptidyl-prolyl cis-trans isomerase FKBP8-like [Amphiprion ocellaris].  
peptidyl-prolyl cis-trans isomerase FKBP8-like [Fundulus heteroclitus].  
PREDICTED: peptidyl-prolyl cis-trans isomerase FKBP8-like [Latimeria chalumna  
peptidyl-prolyl cis-trans isomerase FKBP8 [Orussus abietinus].  
peptidyl-prolyl cis-trans isomerase FKBP8 [Eufriesea mexicana].  
peptidyl-prolyl cis-trans isomerase FKBP8-like isoform X2 [Chrysemys picta be  
PREDICTED: peptidyl-prolyl cis-trans isomerase FKBP8 [Anolis carolinensis].  
PREDICTED: peptidyl-prolyl cis-trans isomerase FKBP8-like [Eufriesea mexicana  
PREDICTED: peptidyl-prolyl cis-trans isomerase FKBP8-like [Lepidothrix corona  
peptidyl-prolyl cis-trans isomerase FKBP8 [Fundulus heteroclitus].  
PREDICTED: peptidyl-prolyl cis-trans isomerase FKBP8-like [Nothobranchius fur  
peptidyl-prolyl cis-trans isomerase FKBP8-like isoform X1 [Chrysemys picta be  
PREDICTED: peptidyl-prolyl cis-trans isomerase FKBP8 isoform X2 [Crassostrea  
peptidyl-prolyl cis-trans isomerase FKBP8-like [Exaipetasia pallida].  
peptidyl-prolyl cis-trans isomerase FKBP8-like isoform X3 [Oryzias melastigma  
putative peptidyl-prolyl cis-trans isomerase FKBP8-like [Scophthalmus maximus  
unnamed protein product [Oncorhynchus mykiss].  
PREDICTED: peptidyl-prolyl cis-trans isomerase FKBP8 isoform X1 [Crassostrea  
PREDICTED: peptidyl-prolyl cis-trans isomerase FKBP8-like [Calidris pugnax].  
PREDICTED: peptidyl-prolyl cis-trans isomerase FKBP8-like [Chelonina mydas].  
peptidyl-prolyl cis-trans isomerase FKBP8-like isoform X2 [Oryzias melastigma]

(503) EMP36068  
(504) XP\_024138543  
(505) OXU31097  
(506) XP\_022202921  
(507) XP\_006557516  
(508) XP\_016770764  
(509) XP\_006615021  
(510) XP\_008546855  
(511) XP\_006557515  
(512) XP\_007254541  
(513) XP\_006615020  
(514) XP\_006557514  
(515) XP\_011053698  
(516) XP\_007254540  
(517) XP\_006615019  
(518) XP\_016913411  
(519) XP\_017559733  
(520) PKU40687  
(521) XP\_016913410  
(522) EGI65888  
(523) XP\_014252350  
(524) XP\_012165944  
(525) XP\_016913409  
(526) XP\_011053696  
(527) XP\_019934661  
(528) XP\_008304064  
(529) XP\_011053695  
(530) CAX74525  
(531) XP\_023811597  
(532) EFZ15418  
(533) OPJ70235  
(534) AAX27902  
(535) XP\_011053694  
(536) XP\_011164040  
(537) XP\_011150605  
(538) EFN77170  
(539) XP\_011164039  
(540) AAH90698  
(541) XP\_014606393  
(542) XP\_003700328  
(543) XP\_683608  
(544) XP\_014606392

peptidyl-prolyl cis-trans isomerase FKBP8 [Chelonia mydas].  
peptidyl-prolyl cis-trans isomerase FKBP8-like isoform X1 [Oryzias melastigma  
hypothetical protein TSAR\_016393 [Trichomalopsis sarcophagae].  
peptidyl-prolyl cis-trans isomerase FKBP8 [Nilaparvata lugens].  
PREDICTED: peptidyl-prolyl cis-trans isomerase FKBP8 isoform X4 [Apis mellifera  
PREDICTED: peptidyl-prolyl cis-trans isomerase FKBP8 isoform X3 [Apis mellifera  
PREDICTED: peptidyl-prolyl cis-trans isomerase FKBP8-like isoform X3 [Apis mellifera  
PREDICTED: peptidyl-prolyl cis-trans isomerase FKBP8 [Microplitis demolitor].  
PREDICTED: peptidyl-prolyl cis-trans isomerase FKBP8 isoform X2 [Apis mellifera  
peptidyl-prolyl cis-trans isomerase FKBP8-like isoform X2 [Astyanax mexicanus  
PREDICTED: peptidyl-prolyl cis-trans isomerase FKBP8-like isoform X2 [Apis mellifera  
PREDICTED: peptidyl-prolyl cis-trans isomerase FKBP8 isoform X1 [Apis mellifera  
PREDICTED: peptidyl-prolyl cis-trans isomerase FKBP8 isoform X4 [Acromyrmex e  
peptidyl-prolyl cis-trans isomerase FKBP8-like isoform X1 [Astyanax mexicanus  
PREDICTED: peptidyl-prolyl cis-trans isomerase FKBP8-like isoform X1 [Apis mellifera  
PREDICTED: peptidyl-prolyl cis-trans isomerase FKBP8-like isoform X3 [Apis mellifera  
PREDICTED: peptidyl-prolyl cis-trans isomerase FKBP8-like isoform X3 [Apis mellifera  
peptidyl-prolyl cis-trans isomerase FKBP8-like [Pygocentrus natter  
peptidyl-prolyl cis-trans isomerase fkbp8-like [Limosa lapponica baueri].  
PREDICTED: peptidyl-prolyl cis-trans isomerase FKBP8-like isoform X2 [Apis mellifera  
FK506-binding protein 8 [Acromyrmex echinator].  
peptidyl-prolyl cis-trans isomerase FKBP8 [Cimex lectularius].  
LOW QUALITY PROTEIN: peptidyl-prolyl cis-trans isomerase FKBP8 [Bombus terrestris  
PREDICTED: peptidyl-prolyl cis-trans isomerase FKBP8-like isoform X1 [Apis mellifera  
PREDICTED: peptidyl-prolyl cis-trans isomerase FKBP8 isoform X3 [Acromyrmex e  
PREDICTED: peptidyl-prolyl cis-trans isomerase FKBP8-like [Paralichthys olivacea  
PREDICTED: peptidyl-prolyl cis-trans isomerase FKBP8-like, partial [Stegastes  
PREDICTED: peptidyl-prolyl cis-trans isomerase FKBP8 isoform X2 [Acromyrmex e  
hypothetical protein [Schistosoma japonicum].  
peptidyl-prolyl cis-trans isomerase FKBP8-like isoform X3 [Oryzias latipes].  
hypothetical protein SINV\_13234, partial [Solenopsis invicta].  
hypothetical protein AV530\_019426 [Patagioenas fasciata monilis].  
SUCHGC02834 protein, partial [Schistosoma japonicum].  
PREDICTED: peptidyl-prolyl cis-trans isomerase FKBP8 isoform X1 [Acromyrmex e  
PREDICTED: peptidyl-prolyl cis-trans isomerase FKBP8 isoform X2 [Solenopsis i  
peptidyl-prolyl cis-trans isomerase FKBP8 [Harpegnathos saltator].  
FK506-binding protein 8 [Harpegnathos saltator].  
PREDICTED: peptidyl-prolyl cis-trans isomerase FKBP8 isoform X1 [Solenopsis i  
Si:ch211-13k12.1 protein, partial [Danio rerio].  
PREDICTED: peptidyl-prolyl cis-trans isomerase FKBP8 isoform X2 [Polistes can  
PREDICTED: peptidyl-prolyl cis-trans isomerase FKBP8 [Megachile rotundata].  
peptidyl-prolyl cis-trans isomerase FKBP8 isoform X1 [Danio rerio].  
PREDICTED: peptidyl-prolyl cis-trans isomerase FKBP8 isoform X1 [Polistes can

(545) XP\_023726255 peptidyl-prolyl cis-trans isomerase FKBP8 isoform X1 [Cryptotermes secundus].  
 (546) XP\_011404052 PREDICTED: peptidyl-prolyl cis-trans isomerase FKBP8-like [Amphimedon queenslandica].  
 (547) XP\_018337850 PREDICTED: peptidyl-prolyl cis-trans isomerase FKBP8 [Trachymyrmex septentrio].  
 (548) XP\_023726263 peptidyl-prolyl cis-trans isomerase FKBP8 isoform X2 [Cryptotermes secundus].  
 (549) XP\_012689022 PREDICTED: peptidyl-prolyl cis-trans isomerase FKBP8-like [Clupea harengus].  
 (550) XP\_015190182 PREDICTED: peptidyl-prolyl cis-trans isomerase FKBP8 [Polistes dominula].  
 (551) XP\_024943519 peptidyl-prolyl cis-trans isomerase FKBP8 isoform X3 [Cephus cinctus].  
 (552) XP\_015437909 PREDICTED: peptidyl-prolyl cis-trans isomerase FKBP8 [Dufourea novaeangliae].  
 (553) KYN13005 peptidyl-prolyl cis-trans isomerase FKBP8 [Trachymyrmex cornetzi].  
 (554) XP\_024943518 peptidyl-prolyl cis-trans isomerase FKBP8 isoform X2 [Cephus cinctus].  
 (555) XP\_012526171 PREDICTED: peptidyl-prolyl cis-trans isomerase FKBP8 [Monomorium pharaonis].  
 (556) XP\_012237396 peptidyl-prolyl cis-trans isomerase FKBP8 [Bombus impatiens].  
 (557) XP\_018372055 PREDICTED: peptidyl-prolyl cis-trans isomerase FKBP8-like isoform X2 [Trachymyrmex septentrio].  
 (558) XP\_015600846 PREDICTED: peptidyl-prolyl cis-trans isomerase FKBP8-like isoform X1 [Trachymyrmex septentrio].  
 (559) XP\_018372054 peptidyl-prolyl cis-trans isomerase FKBP8-like isoform X4 [Oryzias latipes].  
 (560) XP\_023811598 PREDICTED: peptidyl-prolyl cis-trans isomerase FKBP8-like [Blomphalaria glabra].  
 (561) XP\_013086934 PREDICTED: peptidyl-prolyl cis-trans isomerase FKBP8-like [Blomphalaria glabra].  
 (562) XP\_012340112 PREDICTED: peptidyl-prolyl cis-trans isomerase FKBP8 isoform X3 [Apis florea].  
 (563) XP\_012064601 PREDICTED: peptidyl-prolyl cis-trans isomerase FKBP8 [Atta cephalotes].  
 (564) XP\_021933338 peptidyl-prolyl cis-trans isomerase FKBP8-like isoform X2 [Zootermopsis nevadensis].  
 (565) XP\_020469449 peptidyl-prolyl cis-trans isomerase FKBP8-like [Monopterus albus].  
 (566) XP\_012340111 PREDICTED: peptidyl-prolyl cis-trans isomerase FKBP8 isoform X2 [Apis florea].  
 (567) XP\_014772499 PREDICTED: FK506-binding protein-like isoform X3 [Octopus bimaculoides].  
 (568) XP\_021933337 peptidyl-prolyl cis-trans isomerase FKBP8-like isoform X1 [Zootermopsis nevadensis].  
 (569) XP\_002425448 FK506 binding protein, putative [Pediculus humanus corporis].  
 (570) XP\_018053112 PREDICTED: peptidyl-prolyl cis-trans isomerase FKBP8 [Atta colombica].  
 (571) XP\_023811595 peptidyl-prolyl cis-trans isomerase FKBP8-like isoform X2 [Oryzias latipes].  
 (572) XP\_003692338 PREDICTED: peptidyl-prolyl cis-trans isomerase FKBP8 isoform X1 [Apis florea].  
 (573) KQK73886 peptidyl-prolyl cis-trans isomerase FKBP8-like protein [Amazona aestiva].  
 (574) XP\_021933339 peptidyl-prolyl cis-trans isomerase FKBP8-like isoform X3 [Zootermopsis nevadensis].  
 (575) XP\_018025482 PREDICTED: peptidyl-prolyl cis-trans isomerase FKBP8-like [Hyalella azteca].  
 (576) XP\_019335449 PREDICTED: peptidyl-prolyl cis-trans isomerase FKBP8-like, partial [Alligator mississippiensis].  
 (577) XP\_014772498 PREDICTED: peptidyl-prolyl cis-trans isomerase FKBP8-like isoform X2 [Octopus bimaculoides].  
 (578) XP\_023811594 peptidyl-prolyl cis-trans isomerase FKBP8-like isoform X1 [Oryzias latipes].  
 (579) XP\_001846585 FK506 binding protein [Culex quinquefasciatus].  
 (580) XP\_014470017 PREDICTED: peptidyl-prolyl cis-trans isomerase FKBP8 isoform X2 [Dinoponera q.].  
 (581) XP\_002111046 hypothetical protein TRIADRAFT\_63767 [Trichoplax adhaerens].  
 (582) XP\_014772494 PREDICTED: peptidyl-prolyl cis-trans isomerase FKBP8-like isoform X1 [Octopus bimaculoides].  
 (583) KZS20178 Tetratricopeptide repeat protein 9C [Daphnia magna].  
 (584) XP\_014470016 PREDICTED: peptidyl-prolyl cis-trans isomerase FKBP8 isoform X1 [Dinoponera q.].  
 (585) KFM75734 peptidyl-prolyl cis-trans isomerase FKBP8, partial [Stegodyphus mimosarum].  
 (586) XP\_018900271 PREDICTED: peptidyl-prolyl cis-trans isomerase FKBP8 [Bemisia tabaci].

(587) XP\_020392992 peptidyl-prolyl cis-trans isomerase FKBP8-like [Rhincodon typus].  
(588) XP\_016376789 PREDICTED: peptidyl-prolyl cis-trans isomerase FKBP8-like isoform X3 [Sinocyc  
(589) XP\_016345079 PREDICTED: peptidyl-prolyl cis-trans isomerase FKBP8-like [Sinocyclocheilus a  
(590) XP\_014106477 PREDICTED: peptidyl-prolyl cis-trans isomerase FKBP8-like [Pseudopodoces humi  
(591) XP\_014237957 peptidyl-prolyl cis-trans isomerase FKBP8 [Trichogramma pretiosum].  
(592) XP\_016376788 PREDICTED: peptidyl-prolyl cis-trans isomerase FKBP8-like isoform X2 [Sinocyc  
(593) XP\_016376787 PREDICTED: peptidyl-prolyl cis-trans isomerase FKBP8-like isoform X1 [Sinocyc  
(594) CDS28193 FK506 binding protein 8 38 kDa [Hymenolepis microstoma].  
(595) KOC65132 Peptidyl-prolyl cis-trans isomerase FKBP8 [Habropoda laboriosa].  
(596) XP\_017790334 PREDICTED: peptidyl-prolyl cis-trans isomerase FKBP8 [Habropoda laboriosa].  
(597) XP\_020790728 peptidyl-prolyl cis-trans isomerase FKBP8-like [Boleophthalmus pectinirostris  
(598) XP\_012221110 PREDICTED: peptidyl-prolyl cis-trans isomerase FKBP8 isoform X3 [Linepithema  
(599) GAA30660 peptidyl-prolyl cis-trans isomerase FKBP8, partial [Clonorchis sinensis].  
(600) XP\_012221101 PREDICTED: peptidyl-prolyl cis-trans isomerase FKBP8 isoform X2 [Linepithema  
(601) XP\_012221093 PREDICTED: peptidyl-prolyl cis-trans isomerase FKBP8 isoform X1 [Linepithema  
(602) XP\_018649440 putative fk506 binding protein [Schistosoma mansoni].  
(603) EFX68474 hypothetical protein DAPPUDRAFT\_63074 [Daphnia pulex].  
(604) XP\_023229640 peptidyl-prolyl cis-trans isomerase FKBP8-like [Centruroides sculpturatus].  
(605) EAT32833 AAEL014933-PA, partial [Aedes aegypti].  
(606) XP\_016344167 PREDICTED: peptidyl-prolyl cis-trans isomerase FKBP8-like isoform X2 [Sinocyc  
(607) XP\_016344168 PREDICTED: peptidyl-prolyl cis-trans isomerase FKBP8-like isoform X3 [Sinocyc  
(608) XP\_016344166 PREDICTED: peptidyl-prolyl cis-trans isomerase FKBP8-like isoform X1 [Sinocyc  
(609) XP\_016376234 PREDICTED: peptidyl-prolyl cis-trans isomerase FKBP8-like [Sinocyclocheilus r  
(610) XP\_007906811 PREDICTED: peptidyl-prolyl cis-trans isomerase FKBP8-like isoform X2 [Callorh  
(611) KYN04145 peptidyl-prolyl cis-trans isomerase FKBP8 [Cyphomyrmex costatus].  
(612) XP\_014282311 peptidyl-prolyl cis-trans isomerase FKBP8 [Halymorpha halys].  
(613) XP\_015109871 PREDICTED: peptidyl-prolyl cis-trans isomerase FKBP8-like [Diachasma alloeum]  
(614) CDS42647 FK506 binding protein 8 38 kDa [Echinococcus multilocularis].  
(615) XP\_011870270 PREDICTED: peptidyl-prolyl cis-trans isomerase FKBP8 isoform X2 [Vollenhovia  
(616) XP\_011870269 PREDICTED: peptidyl-prolyl cis-trans isomerase FKBP8 isoform X1 [Vollenhovia  
(617) XP\_018977514 PREDICTED: peptidyl-prolyl cis-trans isomerase FKBP8-like [Cyprinus carpio].  
(618) XP\_007906810 PREDICTED: peptidyl-prolyl cis-trans isomerase FKBP8-like isoform X1 [Callorh  
(619) CDS17605 FK506 binding protein 8 38 kDa [Echinococcus granulosus].  
(620) XP\_014206998 peptidyl-prolyl cis-trans isomerase FKBP8 [Copidosoma floridanum].  
(621) XP\_018393954 PREDICTED: peptidyl-prolyl cis-trans isomerase FKBP8 [Cyphomyrmex costatus].  
(622) XP\_015929100 peptidyl-prolyl cis-trans isomerase FKBP8 [Parasteatoda tepidariorum].  
(623) ELU06040 hypothetical protein CAPTEDRAFT\_168280 [Capitella teleta].  
(624) XP\_024353326 Peptidyl-prolyl cis-trans isomerase FKBP8 [Echinococcus granulosus].  
(625) EAT35561 AAEL012272-PA [Aedes aegypti].  
(626) XP\_018359770 PREDICTED: peptidyl-prolyl cis-trans isomerase FKBP8-like [Trachymyrmex corne  
(627) EAT35560 AAEL012272-PB [Aedes aegypti].  
(628) XP\_018319727 PREDICTED: peptidyl-prolyl cis-trans isomerase FKBP8 isoform X2 [Agrilus plan

(629) XP\_001662371 peptidyl-prolyl cis-trans isomerase FKBP8 isoform X2 [Aedes aegypti].  
(630) XP\_018319726 PREDICTED: peptidyl-prolyl cis-trans isomerase FKBP8 isoform X1 [Agrilus plan  
(631) XP\_001662370 peptidyl-prolyl cis-trans isomerase FKBP8 isoform X1 [Aedes aegypti].  
(632) XP\_012269548 peptidyl-prolyl cis-trans isomerase FKBP8 isoform X1 [Athalia rosae].  
(633) PAA92621 hypothetical protein BOX15\_Mlig010424g1 [Macrostromum lignano].  
(634) XP\_019867812 PREDICTED: LOW QUALITY PROTEIN: peptidyl-prolyl cis-trans isomerase FKBP8-lik  
(635) PAA53270 hypothetical protein BOX15\_Mlig007838g1 [Macrostromum lignano].  
(636) PAA57938 hypothetical protein BOX15\_Mlig010979g3 [Macrostromum lignano].  
(637) XP\_966821 PREDICTED: peptidyl-prolyl cis-trans isomerase FKBP8 [Tribolium castaneum].  
(638) KXJ84517 hypothetical protein RP20\_CCG023547 [Aedes albopictus].  
(639) XP\_023345477 peptidyl-prolyl cis-trans isomerase FKBP8-like isoform X3 [Eurytemora affinis  
(640) XP\_011494478 PREDICTED: peptidyl-prolyl cis-trans isomerase FKBP8 [Ceratosolen solmsi marc  
(641) XP\_023345475 peptidyl-prolyl cis-trans isomerase FKBP8-like isoform X1 [Eurytemora affinis  
(642) XP\_016940923 PREDICTED: peptidyl-prolyl cis-trans isomerase FKBP8 [Drosophila suzukii].  
(643) XP\_023345476 peptidyl-prolyl cis-trans isomerase FKBP8-like isoform X2 [Eurytemora affinis  
(644) PNF41144 hypothetical protein B7P43\_G04230 [Cryptotermes secundus].  
(645) XP\_019932587 PREDICTED: peptidyl-prolyl cis-trans isomerase FKBP8-like isoform X2 [Aedes a  
(646) XP\_019932586 PREDICTED: peptidyl-prolyl cis-trans isomerase FKBP8-like isoform X1 [Aedes a  
(647) XP\_016028426 uncharacterized protein Dsimw501\_GD25378, isoform B [Drosophila simulans].  
(648) XP\_016958803 PREDICTED: peptidyl-prolyl cis-trans isomerase FKBP8 [Drosophila biarmipes].  
(649) EKC18274 hypothetical protein CGI\_10013873 [Crassostrea gigas].  
(650) PNF41145 hypothetical protein B7P43\_G04230, partial [Cryptotermes secundus].  
(651) XP\_011636531 peptidyl-prolyl cis-trans isomerase FKBP8 [Pogonomyrmex barbatu].  
(652) XP\_017014991 PREDICTED: peptidyl-prolyl cis-trans isomerase FKBP8 [Drosophila takahashi].  
(653) XP\_001974711 uncharacterized protein Dere\_GG20961 [Drosophila erecta].  
(654) XP\_024874265 peptidyl-prolyl cis-trans isomerase FKBP8-like isoform X2 [Temnothorax curvis  
(655) NP\_611353 uncharacterized protein Dmel\_CG5482, isoform A [Drosophila melanogaster].  
(656) XP\_016984960 PREDICTED: peptidyl-prolyl cis-trans isomerase FKBP8 [Drosophila rhopaloe].  
(657) XP\_017054378 PREDICTED: peptidyl-prolyl cis-trans isomerase FKBP8 [Drosophila ficusphila].  
(658) XP\_024874264 peptidyl-prolyl cis-trans isomerase FKBP8-like isoform X1 [Temnothorax curvis  
(659) XP\_019545364 PREDICTED: peptidyl-prolyl cis-trans isomerase FKBP8 isoform X2 [Aedes albopi  
(660) XP\_019545363 PREDICTED: peptidyl-prolyl cis-trans isomerase FKBP8 isoform X1 [Aedes albopi  
(661) XP\_014670901 PREDICTED: peptidyl-prolyl cis-trans isomerase FKBP8-like isoform X1 [Priapul  
(662) XP\_017079421 PREDICTED: peptidyl-prolyl cis-trans isomerase FKBP8 [Drosophila eugracilis].  
(663) XP\_013113222 PREDICTED: peptidyl-prolyl cis-trans isomerase FKBP8 [Stomoxys calcitrans].  
(664) XP\_002034480 GM19892 [Drosophila sechellia].  
(665) XP\_017031858 PREDICTED: peptidyl-prolyl cis-trans isomerase FKBP8 [Drosophila kikkawai].  
(666) XP\_015788695 peptidyl-prolyl cis-trans isomerase FKBP8 [Tetranychus urticae].  
(667) XP\_017117238 PREDICTED: peptidyl-prolyl cis-trans isomerase FKBP8 [Drosophila elegans].  
(668) XP\_015364528 PREDICTED: peptidyl-prolyl cis-trans isomerase FKBP8 [Diuraphis noxia].  
(669) XP\_017836078 PREDICTED: peptidyl-prolyl cis-trans isomerase FKBP8 [Drosophila busckii].  
(670) XP\_316645 AGAP006615-PA [Anopheles gambiae str. PEST].



|       |              |                                                                                 |
|-------|--------------|---------------------------------------------------------------------------------|
| (671) | XP_002091890 | uncharacterized protein Dyak_GE13900 [Drosophila yakuba].                       |
| (672) | XP_009022869 | hypothetical protein HELRODRAFT_188959 [Helobdella robusta].                    |
| (673) | XP_020815089 | peptidyl-prolyl cis-trans isomerase FKBP8 [Drosophila serrata].                 |
| (674) | KY018601     | peptidyl-prolyl cis-trans isomerase FKBP8-like [Alligator mississippiensis].    |
| (675) | XP_023307145 | peptidyl-prolyl cis-trans isomerase FKBP8 [Lucilia cuprina].                    |
| (676) | XP_004526322 | peptidyl-prolyl cis-trans isomerase FKBP8 [Ceratitis capitata].                 |
| (677) | XP_017468465 | PREDICTED: peptidyl-prolyl cis-trans isomerase FKBP8 [Rhagoletis zephyria].     |
| (678) | XP_011213061 | PREDICTED: peptidyl-prolyl cis-trans isomerase FKBP8 [Bactrocera dorsalis].     |
| (679) | ETN59059     | fk506 binding protein [Anopheles darlingi].                                     |
| (680) | XP_019877780 | PREDICTED: peptidyl-prolyl cis-trans isomerase FKBP8-like [Aethina tumida].     |
| (681) | XP_001951673 | PREDICTED: peptidyl-prolyl cis-trans isomerase FKBP8 [Acyrtosiphon pisum].      |
| (682) | XP_002062976 | peptidyl-prolyl cis-trans isomerase FKBP8 [Drosophila willistoni].              |
| (683) | XP_001986816 | GH21577 [Drosophila grimshawi].                                                 |
| (684) | XP_022181773 | peptidyl-prolyl cis-trans isomerase FKBP8 [Myzus persicae].                     |
| (685) | XP_002048800 | uncharacterized protein Dvir_GJ21121 [Drosophila virilis].                      |
| (686) | XP_018801327 | PREDICTED: peptidyl-prolyl cis-trans isomerase FKBP8 [Bactrocera latifrons].    |
| (687) | XP_020300622 | peptidyl-prolyl cis-trans isomerase FKBP8 [Pseudomyrmex gracilis].              |
| (688) | XP_011193416 | PREDICTED: peptidyl-prolyl cis-trans isomerase FKBP8 [Zeugodacus cucurbitae].   |
| (689) | XP_017960399 | PREDICTED: peptidyl-prolyl cis-trans isomerase FKBP8 [Drosophila navojoa].      |
| (690) | ACO13176     | FK506-binding protein 8 [Lepeophtheirus salmonis].                              |
| (691) | XP_011350211 | PREDICTED: peptidyl-prolyl cis-trans isomerase FKBP8 [Ooceraea biro].           |
| (692) | KRT81327     | hypothetical protein AMK59_5847, partial [Oryctes borbonicus].                  |
| (693) | XP_023162735 | peptidyl-prolyl cis-trans isomerase FKBP8 [Drosophila hydei].                   |
| (694) | XP_019771996 | PREDICTED: peptidyl-prolyl cis-trans isomerase FKBP8 [Dendroctonus ponderosae]. |
| (695) | XP_005176045 | PREDICTED: peptidyl-prolyl cis-trans isomerase FKBP8 [Musca domestica].         |
| (696) | XP_014095636 | PREDICTED: peptidyl-prolyl cis-trans isomerase FKBP8 [Bactrocera oleae].        |
| (697) | XP_017867395 | PREDICTED: peptidyl-prolyl cis-trans isomerase FKBP8 [Drosophila arizonae].     |
| (698) | XP_002004550 | uncharacterized protein Dmoj_GI19549 [Drosophila mojavensis].                   |
| (699) | XP_022921247 | peptidyl-prolyl cis-trans isomerase FKBP8-like [Onthophagus taurus].            |
| (700) | XP_002015767 | GL1238 [Drosophila persimilis].                                                 |
| (701) | XP_001360319 | uncharacterized protein Dpse_GA18915 [Drosophila pseudoobscura pseudoobscura].  |
| (702) | XP_017147297 | PREDICTED: peptidyl-prolyl cis-trans isomerase FKBP8 [Drosophila miranda].      |
| (703) | XP_019879021 | PREDICTED: peptidyl-prolyl cis-trans isomerase FKBP8-like [Aethina tumida].     |
