# Supplementary material for: Compression of Large Sets of Sequence Data Reveals Fine Diversification of Functional Profiles in Multigene Families of Proteins: A Study for Peptidyl-Prolyl cis/trans Isomerases (PPIase)
Source: MDPI journal article supplement (doi:10.3390/biom9020059), 2019-02-11
Supplement: s1 [file s1]

```

C                                     *
C                                     * * *
C                                     * * * * *
C                                     Data_Processing program 'Flat GenBank Format'
C                                     taken from Blast or Protein search in the NCBI
C+++++
C                                     * * *
C                                     Program for reading standard sequence entry Flat GenBank Format
C                                     * * *
C                                     Programmed by Andrzej Galat
C                                     Copyright (c) Andrzej Galat 21/6/2001
C                                     * * * * *
C                                     The Data_gen program is made available under the following
C                                     conditions:
C                                     1) The program shall be used for scientific purpose only,
C                                     excluding industrial or commercial purpose.
C                                     2) Proper acknowledgement shall be made to the author of the
C                                     program in publications resulting from the use of Data_gen
C                                     3) The program shall not be made available to users outside
C                                     the recipient's laboratory, unless written consent is
C                                     obtained.
C+++++
C                                     This program is distributed in the hope that it will be useful, but
C                                     WITHOUT ANY WARRANTY; without even the implied warranty of
C                                     MERCHANTABILITY or FITNESS FOR A PARTICULAR PURPOSE!
C                                     -----
C                                     Overhauled 11/7/2001 & 25/2/2009 - 25-April-2014
C                                     |||
C                                     Program Data_gen
C////////////////////////////////////
C                                     Dimensioned for 10000 Codes/entries in given collection of entries
C                                     Sequence length = 50,000 AAs in a sequence
C                                     Parameter (Lsq=50000, Mpas=50000)
C                                     Character*1 Seqa(Lsq), AFF, Paxa(20), Paya(20), Chah(9)
C                                     Character*90 Kopa, Fila, Line, Title, Source, Tito(100)
C                                     Character*160 LIPA
C                                     Character*25 Codett(Mpas), Word, Code, Pop, Coda(Mpas)
C                                     Integer Lmaxa(Mpas), Jcant(4)
C                                     Logical Definex, GotIt
C                                     Data Chah/'1','2','3','4','5','6','7','8','9'/
C                                     Data Paxa/'a','c','d','e','f','g','h','i','k','l','m','n',
C                                     "      'p','q','r','s','t','v','w','y'/
C                                     Data Paya/'A','C','D','E','F','G','H','I','K','L','M','N',
C                                     "      'P','Q','R','S','T','V','W','Y'/
C                                     -----
C                                     First executional statement
C                                     Definex = .false.
C                                     IPL = 0
C                                     Jcont = 0
C                                     JWRITE = 6
C                                     Do J=1,4
C                                     Jcant(J) = 0
C                                     enddo
C////////////////////////////////////
C                                     Open(Unit=Jwrite,file='nnbb.out',status='unknown')
C                                     Open the output file (data.seq = library of sequences to hymapi or
C                                     datapx)
C                                     Open(Unit=1,file='data.xry',status='unknown')

```

```

Open(Unit=2,file='data.npp',status='unknown')
Open(Unit=3,file='data.xpp',status='unknown')
Open(Unit=4,file='data.div',status='unknown')
Open(Unit=8,file='data.rem',status='unknown')
Open(Unit=9,file='data.seq',status='unknown')
Open(Unit=10,file='data.tit',status='unknown')
Open(Unit=11,file='data.fas',status='unknown')
Open(Unit=12,file='data.cod',status='unknown')
Open(Unit=14,file='data.fun',status='unknown')
Open(Unit=15,file='data.num',status='unknown')
C=====C
C      * * * * * the Data_Proc header * * * * * C
C=====C
      WRITE(JWRITE,8000)
8000 FORMAT(/15X,'Analysis of standard sequence entries'/
#      12X,'Data_gen program - Version V2.1 - Spring 2001'/)
C
      Jfun = 0
      J1 = 0
      J2 = 0
      J3 = 0
      J4 = 0
C      Above indexes for files
      Open(Unit=5,status='unknown')
      Read(5,10) Fila
      Read(5,10) Word
10      Format(A)
      Close(5)

      Do J=1,80
      If(Fila(J:J) .ne. ' ') Then
      Ja = J
      Do K=80,1,-1
      If(Fila(K:K) .ne. ' ') Then
      Jb = K
      goto 120
      endif
      Enddo
      Endif
      enddo

120 Write(Jwrite,12) JA, Jb, Fila(Ja:Jb)
12      Format(5X,'Reading from datafile || Len =',I2,'-',I2,' || ',2X,A/)
      Write(9,14) Fila
14      Format('!',1X,'This was created from:',2X,A)
C
      Do J=1,25
      If(Word(J:J) .ne. ' ') Then
      Jc = J
      Do K=25,1,-1
      If(Word(K:K) .ne. ' ') Then
      Jd = K-1
      write(Jwrite,12) Jc, Jd, Word
      goto 140
      endif
      Enddo
      Endif
      enddo

```

```

140 Write(Jwrite,150) Jd-Jc+1, Word(Jc:Jd+1)
    Write(14,155) Word(Jc:Jd+1)
155 Format('!',5X,'Word-in-database',1X,A)
150 Format(5X,'Searching for word-length',1X,I2,1X,A/)
    Jdd = Jd-Jc+1
    Open(Unit=19,file=Fila,status='old')
100 Read(19,1,Err=990,End=990) Line
    Jcont = Jcont + 1
    If(Line(1:1) .eq. '!') Write(Jwrite,1) Line
    If(Line(1:1) .eq. '!') Write(9,1) Line
    If(Line(1:10) .eq. 'DEFINITION') Then
        IPL = IPL + 1
        LIPA(1:40) = '
        LIPA(41:80) = '
        LIPA(81:120) = '
        LIPA(121:160) = '
        Do K = 80,1,-1
        La = K
        If(Line(K:K) .ne. ' ') goto 1255
    Enddo
1255 Kopa = Line(13:La+1)
    LIPA(1:La-12) = Kopa
    Klos = 0
    Do J = 80,1,-1
    If(LIPA(J:J) .ne. ' ') Then
        Klos = J
        goto 1230
    Endif
    Enddo
1230 Read(19,1,Err=990) Line
    If(Line(1:10) .eq. 'ACCESSION ') goto 1350
    Do KK = 80,1,-1
    Jbb = KK
    If(Line(KK:KK) .ne. ' ') goto 1285
    Enddo
1285 LIPA = LIPA(1:La-11)//Line(13:Jbb)
    Klos = 0
    Do J = 160,1,-1
    If(LIPA(J:J) .ne. ' ') Then
        Klos = J
        goto 1240
    Endif
    Enddo
1240 Continue
    GOTO 100
    Endif

C-----
    If(Line(1:6) .eq. 'SOURCE') Then
        Source = Line(1:80)
        Goto 100
    Endif

C
1350 If(Line(1:10) .eq. 'ACCESSION ') Then
    Do Jp = 13,35
    If(Line(Jp:Jp) .eq. ' ') Then
        Code = Line(13:Jp)//'
        goto 160

```

```

        Endif
    Enddo
C-----
160 Do L=1,9
    If(Code(1:1) .eq. Chah(L)) Then
        J1 = J1 + 1
        Jcant(1) = Jcant(1) + 1
        Write(1,170) J1, IPL, Code(1:12), Title
170 Format(I4,1X,'(',I4,')',1X,A12,'|| ',A)
        goto 145
    endif
enddo

    If(Code(1:2) .eq. 'NP') Then
        J2 = J2 + 1
        Write(2,170) J2, IPL, Code(1:12), Title
        Jcant(2) = Jcant(2) + 1
        goto 145
    endif

    If(Code(1:2) .eq. 'XP') Then
        J3 = J3 + 1
        Write(3,170) J3, IPL, Code(1:12), Title
        Jcant(3) = Jcant(3) + 1
        goto 145
    endif

    J4 = J4 + 1
    Write(4,170) J4, IPL, Code(1:12), Title
    Jcant(4) = Jcant(4)+1
145 Do L = 1,24
    If(Code(L:L) .eq. ' ') then
        Pop = Code(1:L)
        goto 35
    Endif
Enddo

35 Code = Pop
Do K1 = 1,80
    If(Title(K1:K1+Jdd-1) .eq. Word(Jc:Jd)) Then
        Jfun = Jfun + 1
        Codett(Jfun) = Code
        Write(Jwrite,220) Jfun, Code(1:12), Title
        Write(14,225) Code(1:15)
225 Format(1X,A)
220 Format(I5,1X,A,1X,A)
        goto 280
    endif
enddo

280 Definex = .false.
GOTO 100
Endif

C----- Reading the sequence records

IM = 0
IJJ = 0
If(Line(1:10) .eq. 'ORIGIN ') Then

```

```

200 Read(19,1) Line
    Jcont = Jcont + 1
    If(Line(1:2) .eq. '//') Then
        IJJ = 60
        Goto 300
    Endif

    IL = 0
    DO J=11,75
        If(Line(J:J) .eq. ' ' .and. Line(J+1:J+1) .eq. ' ') goto 300
        If(Line(J:J) .eq. ' ') goto 400
        IL = IL + 1
        Seqa(IL+IM) = Line(J:J)
400 Continue
    Enddo
C
    IM = IM + 60
    Goto 200
C
300 IM = IM + IL - IJJ
    Seqa(IM+1) = '*'
    Write(15,*) IM

    If(IPL .gt. 10000) Then
        Write(Jwrite,60) IPL
60  Format('!!!!!! The number of entries too big',I6/)
        goto 990
    endif
C
    -----
    Lmaxa(IPL) = IM
    Coda(IPL) = Code
C
1  Format(A)
    Write(10,40)
40  Format(/)
    Write(10,25) IPL, Code, IM
25  Format(2X,'Entry #',I5,3X,'Code',1X,A,2X,'Naa',I6)
    write(9,20) Code
20  Format('>',2X,A)
    write(9,21) LIPA(1:Klos)
    Write(10,21) LIPA(1:Klos)
21  Format('>',2X,A)
    IF(IY .GE. 1) Then
        DO IB = 1,IY
            Write(10,355) Tito(IB)
355  Format(A)
        Enddo
    Endif
C
    Write(10,355) Source
    Write(8,800) IPL, Code(1:14), IM, LIPA(1:Klos)
800  Format(I5,1X,A,' || ',I4,1X,A)
    Write(11,350) Code,LIPA(1:Klos)
350  Format('>',A,12X,A)
    Write(11,4000) (Seqa(I),I=1,IM)
4000 format(70A1)
    write(12,115) Code
115  Format(1X,A)

```

```

C-----
      Code = '
      IY = 0
      DO J=1,IM
      AFF = Seqa(J)
      DO K=1,20
      If(AFF .eq. Paxa(K)) Seqa(J) = Paya(K)
      Enddo
      Enddo
      write(9,22) (Seqa(I),I=1,IM+1)
22      Format(70A1)
      Endif
C-----
      If(Definex .and. Line(1:10) .eq. '          ') Then
      IY = IY + 1
      Tito(IY) = Line(13:77)
      elseif(Definex .and. Line(1:10) .ne. '          ') then
      Definex = .false.
      Endif
      GotIt = .false.
      goto 100

C      Close down all the activities

990 Write(12,1550)
1550 Format('CONSTR')
      Lpm = 1
      Do J=1,IPL
      write(12,1450) Coda(J), Lpm, Lmaxa(J)
      enddo
1450 format(A,I3,5X,I6)
      Write(Jwrite,30) IPL
30      Format(/10X,'Read-in sequence-entries ||',I5,' ||'/)
      Write(Jwrite,34)
C      10      20      30      40      50      60      70
C123456789012345678901234567890123456789012345678901234567890
34      Format(4X,'X-ray code',2X,'NP_xxxx code',2X,'XP_xxxx code',2X,
      #      'Other_types')
      Write(Jwrite,36) (Jcant(J),J=1,4)
36      Format(1X,4('|| ',I7,3X))
      Write(14,1550)
      Mm = 1
      Do J=1,Jfun
      Code = Codett(J)
      Do K = 1,IPL
      If(Code .eq. Coda(K)) Then
      Lend = Lmaxa(K)
      goto 49
      Endif
      Enddo
49      Write(14,44) Code(1:15), Mm, Lend
      Enddo
44      format(A,2I6)
      WRITE(JWRITE,1999) Jcont
1999 FORMAT(/12X,'Datafile contains ',I7,' line-entries'/
      #      12X,'-> Data_gen ', '( Job finished )'/)
C      Close files
      Close(6)

```

```
Close(1)  
Close(2)  
Close(3)  
Close(4)  
Close(11)  
Close(12)  
Close(9)  
Close(10)  
END
```
