# Supplementary material for: Compression of Large Sets of Sequence Data Reveals Fine Diversification of Functional Profiles in Multigene Families of Proteins: A Study for Peptidyl-Prolyl cis/trans Isomerases (PPIase)
Source: MDPI journal article supplement (doi:10.3390/biom9020059), 2019-02-11
Supplement: s1 [file s1]

CLUSTAL 2.0.9 multiple sequence alignment of FKBP2 from FKBP51s

```

NP_004108B      DLFE--DGGIIRRTKRKGEGYSNPNEGATVEIHLEGRCCGGRMFDCRDVAFTVGEDEDHDI
XP_518427B      DLFE--DGGIIRRTKRKGEGYSNPNEGATVEIHLEGRCCGGRMFDCRDVAFTVGEDEDHDI
XP_004043925B   DLFE--DGGIIRRTKRKGEGYSNPNEGATVEIHLEGRCCGGRMFDCRDVAFTVGEDEDHDI
XP_003278903B   DLFE--DGGIIRRTKRKGEGYSNPNEGATVEIHLEGRCCGGRMFDCRDVAFTVGEDEDHDI
NP_001124689B   DLFE--DGGIIRRTKRKGEGYSNPNEGATVEIHLEGRCCGGRMFDCRDVAFTVGEDEDHDI
XP_010387961B   DLFE--DGGIIRRTKRKGEGYSNPNEGATVEIHLEGRCCGGRMFDCRDVAFTVGEDEDHDI
XP_023068393B   DLFE--DGGIIRRTKRKGEGYSNPNEGATVEIHLEGRCCGGRMFDCRDVAFTVGEDEDHDI
AAA86245B       DLFE--DGGIIRRTKRKGEGYSNPNEGATVEIHLEGRCCGGRMFDCRDVAFTVGEDEDHDI
XP_003897547B   DLFE--DGGIIRRTKRKGEGYSNPNEGATVEIHLEGRCCGGRMFDCRDVAFTVGEDEDHDI
XP_011841956B   DLFE--DGGIIRRTKRKGEGYSNPNEGATVEIHLEGRCCGGRMFDCRDVAFTVGEDEDHDI
XP_011800768B   DLFE--DGGIIRRTKRKGEGYSNPNEGATVEIHLEGRCCGGRMFDCRDVAFTVGEDEDHDI
XP_005553272B   DLFE--DGGIIRRTKRKGEGYSNPNEGATVEIHLEGRCCGGRMFDCRDVAFTVGEDEDHDI
XP_007971022B   DLFE--DGGIIRRTKRKGEGYSNPNEGATVEIHLEGRCCGGRMFDCRDVAFTVGEDEDHDI
Q95L05B         DLFE--DGGIIRRTKRKGEGYSNPNEGATVEIHLEGRCCGGRMFDCRDVAFTVGEDEDHDI
XP_011930726B   DLFE--DGGIIRRTKRKGEGYSNPNEGATVEIHLEGRCCGGRMFDCRDVAFTVGEDEDHDI
XP_022437414B   DLFE--DGGIIRRTKRKGEGYSNPNEGATVEIHLEGRCCGGRMFDCRDVGFIVGEDEDHDI
XP_024267730B   DLFE--DGGIIRRTKRKGEGYSNPNEGATVEIHLEGRCCGGRMFDCRDVGFIVGEDEDHDI
XP_007467316B   DLFE--DGGIIRRTKRKGEGYSNPNEGATVEIHLEGRCCGGRMFDCRDVGFIVGEDEDHDI
XP_006202142B   DLFE--DGGIIRRTKRKGEGYSNPNEGATVEIHLEGRCCGGRMFDCRDVGFIVGEDEDHDI
XP_020024507B   DLFE--DGGIIRRTKRKGEGYSNPNEGATVEIHLEGRCCGGRMFDCRDVGFIVGEDEDHDI
XP_013833281B   DLFE--DGGIIRRTKRKGEGYSNPNEGATVEIHLEGRCCGGRMFDCRDVGFIVGEDEDHDI
XP_020024506B   DLFE--DGGIIRRTKRKGEGYSNPNEGATVEIHLEGRCCGGRMFDCRDVGFIVGEDEDHDI
XP_020953710B   DLFE--DGGIIRRTKRKGEGYSNPNEGATVEIHLEGRCCGGRMFDCRDVGFIVGEDEDHDI
NP_001302540B   DLFE--DGGIIRRTKRKGEGYSNPNEGATVEIHLEGRCCGGRMFDCRDVGFIVGEDEDHDI
XP_020142566B   DLFE--DGGIIRRTKRKGEGYSNPNEGATVEIHLEGRCCGGRMFDCRDVGFIVGEDEDHDI
XP_006180531B   DLFE--DGGIIRRTKRKGEGYSNPNEGATVEIHLEGRCCGGRMFDCRDVGFIVGEDEDHDI
XP_015343090B   DLFE--DGGIIRRTKRKGEGYSNPNEGATVEIHLEGRCCGGRMFDCRDVGFIVGEDEDHDI
XP_005318831B   DLFE--DGGIIRRTKRKGEGYSNPNEGATVEIHLEGRCCGGRMFDCRDVGFIVGEDEDHDI
XP_010947329B   DLFE--DGGIIRRTKRKGEGYSNPNEGATVEIHLEGRCCGGRMFDCRDVGFIVGEDEDHDI
XP_023977801B   DLFE--DGGIIRRTKRKGEGYSNPNEGATVEIHLEGRCCGGRMFDCRDVGFIVGEDEDHDI
XP_020742361B   DLFE--DGGIIRRTKRKGEGYSNPNEGATVEIHLEGRCCGGRMFDCRDVGFIVGEDEDHDI
XP_007198040B   DLFE--DGGIIRRTKRKGEGYSNPNEGATVEIHLEGRCCGGRMFDCRDVGFIVGEDEDHDI
XP_017894445B   DLFE--DGGIIRRTKRKGEGYSNPNEGATVEIHLEGRCCGGRMFDCRDVGFIVGEDEDHDI
XP_002714685B   DLFE--DGGIIRRTKRKGEGYSNPNEGATVEIHLEGRCCGGRMFDCRDVGFIVGEDEDHDI
XP_012502082B   DLFE--DGGIIRRTKRKGEGYSNPNEGATVEIHLEGRCCGGRMFDCRDVGFIVGEDEDHDI
XP_004379454B   DLFE--DGGIIRRTKRKGEGYSNPNEGATVEIHLEGRCCGGRMFDCRDVGFIVGEDEDHDI
XP_023368573B   DLFE--DGGIIRRTKRKGEGYSNPNEGATVEIHLEGRCCGGRMFDCRDVGFIVGEDEDHDI
XP_014958158B   DLFE--DGGIIRRTKRKGEGYSNPNEGATVEIHLEGRCCGGRMFDCRDVGFIVGEDEDHDI
NP_001295455B   DLFE--DGGIIRRTKRKGEGYSNPNEGATVEIHLEGRCCGGRMFDCRDVGFIVGEDEDHDI
XP_003789178B   DLFE--DGGIIRRTKRKGEGYSNPNEGATVEIHLEGRCCGGRMFDCRDVGFIVGEDEDHDI
XP_006050442B   DLFE--DGGIIRRTKRKGEGYSNPNEGATVEIHLEGRCCGGRMFDCRDVGFIVGEDEDHDI
XP_005979785B   DLFE--DGGIIRRTKRKGEGYSNPNEGATVEIHLEGRCCGGRMFDCRDVGFIVGEDEDHDI
XP_004770745B   DLFE--DGGIIRRTKRKGEGYSNPNEGATVEIHLEGRCCGGRMFDCRDVGFIVGEDEDHDI
XP_011967348B   DLFE--DGGIIRRTKRKGEGYSNPNEGATVEIHLEGRCCGGRMFDCRDVGFIVGEDEDHDI
NP_001179791B   DLFE--DGGIIRRTKRKGEGYSNPNEGATVEIHLEGRCCGGRMFDCRDVGFIVGEDEDHDI
XP_017826524B   DLFE--DGGIIRRTKRKGEGYSNPNEGATVEIHLEGRCCGGRMFDCRDVGFIVGEDEDHDI
XP_004424279B   DLFE--DGGIIRRTKRKGEGYSNPNEGATVEIHLEGRCCGGRMFDCRDVGFIVGEDEDHDI
NP_001266943B   DLFE--DGGIIRRTKRKGEGYSNPNEGATVEIHLEGRCCGGRMFDCRDVGFIVGEDEDHDI
XP_022366563B   DLFE--DGGIIRRTKRKGEGYSNPNEGATVEIHLEGRCCGGRMFDCRDVGFIVGEDEDHDI
XP_017378122B   DLFE--DGGIIRRTKRKGEGYSNPNEGATVEIHLEGRCCGGRMFDCRDVGFIVGEDEDHDI
XP_023480581B   DLFE--DGGIIRRTKRKGEGYSNPNEGATVEIHLEGRCCGGRMFDCRDVGFIVGEDEDHDI
XP_006144244B   DLFE--DGGIIRRTKRKGEGYSNPNEGATVEIHLEGRCCGGRMFDCRDVGFIVGEDEDHDI
XP_006882111B   DLFE--DGGIIRRTKRKGEGYSNPNEGATVEIHLEGRCCGGRMFDCRDVGFIVGEDEDHDI
XP_008528289B   DLFE--DGGIIRRTKRKGEGYSNPNEGATVEIHLEGRCCGGRMFDCRDVGFIVGEDEDHDI
XP_538880B      DLFE--DGGIIRRTKRKGEGYSNPNEGATVEIHLEGRCCGGRMFDCRDVGFIVGEDEDHDI
XP_012885079B   DLFE--DGGIIRRTKRKGEGYSNPNEGATVEIHLEGRCCGGRMFDCRDVGFIVGEDEDHDI
XP_012420443B   DLFE--DGGIIRRTKRKGEGYSNPNEGATVEIHLEGRCCGGRMFDCRDVGFIVGEDEDHDI
Q9XS12B         DLFE--DGGIIRRTKRKGEGYSNPNEGATVEIHLEGRCCGGRMFDCRDVGFIVGEDEDHDI
XP_006739186B   DLFE--DGGIIRRTKRKGEGYSNPNEGATVEIHLEGRCCGGRMFDCRDVGFIVGEDEDHDI
XP_003404000B   DLFE--DGGIIRRTKRKGEGYSNPNEGATVEIHLEGRCCGGRMFDCRDVGFIVGEDEDHDI
XP_021540340B   DLFE--DGGIIRRTKRKGEGYSNPNEGATVEIHLEGRCCGGRMFDCRDVGFIVGEDEDHDI
XP_002914343B   DLFE--DGGIIRRTKRKGEGYSNPNEGATVEIHLEGRCCGGRMFDCRDVGFIVGEDEDHDI
XP_006860458B   DLFE--DGGIIRRTKRKGEGYSNPNEGATVEIHLEGRCCGGRMFDCRDVGFIVGEDEDHDI
XP_008691621B   DLFE--DGGIIRRTKRKGEGYSNPNEGATVEIHLEGRCCGGRMFDCRDVGFIVGEDEDHDI
XP_004624255B   DLFE--DGGIIRRTKRKGEGYSNPNEGATVEIHLEGRCCGGRMFDCRDVGFIVGEDEDHDI
XP_006907392B   DLFE--DGGIIRRTKRKGEGYSNPNEGATVEIHLEGRCCGGRMFDCRDVGFIVGEDEDHDI
XP_006759086B   DLFE--DGGIIRRTKRKGEGYSNPNEGATVEIHLEGRCCGGRMFDCRDVGFIVGEDEDHDI
XP_007534316B   DLFE--DGGIIRRTKRKGEGYSNPNEGATVEIHLEGRCCGGRMFDCRDVGFIVGEDEDHDI
XP_004590364B   DLFE--DGGIIRRTKRKGEGYSNPNEGATVEIHLEGRCCGGRMFDCRDVGFIVGEDEDHDI
XP_005389619B   DLFE--DGGIIRRTKRKGEGYSNPNEGATVEIHLEGRCCGGRMFDCRDVGFIVGEDEDHDI

```













XP\_020371994B  
XP\_023669222B  
XP\_017541827B  
XP\_016372735B  
XP\_016322567B  
XP\_018602419B  
XP\_019805261B  
XP\_013987820B  
XP\_023843348B  
XP\_021332470B  
XP\_005166078B  
XP\_021424491B  
NP\_998314B  
XP\_016314457B  
XP\_024283464B  
XP\_012670459B  
XP\_021465979B  
XP\_020339278B  
XP\_005142250B  
XP\_024229852B  
XP\_023852739B  
XP\_020342285B  
XP\_016108165B  
XP\_023270066B  
XP\_018541261B  
XP\_007899824B  
XP\_022602390B  
XP\_020507498B  
XP\_022602392B  
XP\_022602391B  
XP\_016384571B  
XP\_007937638B  
XP\_009894963B  
XP\_014843613B  
XP\_020789713B  
XP\_006783146B  
XP\_004548817B  
XP\_003448395B  
KFV64423B  
XP\_007903293B  
XP\_005927577B  
XP\_006265443B  
XP\_014795643B  
XP\_006035184B  
XP\_021177252B  
XP\_005724522B  
XP\_007551477B  
XP\_017160280B  
XP\_008406990B  
XP\_010573701B  
XP\_022531443B  
XP\_005810495B  
XP\_022044943B  
XP\_014897893B  
XP\_023136030B  
OPJ69275B  
XP\_008109533B  
XP\_014349043B  
XP\_008283913B  
XP\_006633816B  
XP\_008071742B  
XP\_006035186B  
XP\_019964054B  
XP\_017685573B  
XP\_005531080B  
XP\_015814339B  
XP\_013811689B  
XP\_021249927B

PIGVDKALEKMRRGEHCILHLMPEY-GFGDLGKPHLNVPPNAELDY  
PLGVDRAEMKMQKGECCLLYLKPKY-GFGKEGRPKMDVGPNAELVY  
PLGVDRAEMKMQKGECCLLYLKPKY-GYGKEGKPEYDIGPNAELLY  
PLGVDRAEMKIQKGECCLLYLKPKY-GYGKEGKKEYDIGSNAELLY  
PLGVDRAEMKIQKGECCLLYLKPKY-GYGKEGKKEYDIGSNAELLY  
PLGVDRAEMKMQECCLLYLKPKY-GFGKEGCPNLNIGPNAELMY  
PIGIDKALEKMQRREEQCILYLGPYR-GFGEAGKPEFGIEPNAELIY  
PLGVDRAEMKMQKGECCMLYLKPKY-GFGKEGRAQYKIGPNSDLVY  
PLGVDRAEMKMQKGECCMLYLKPKY-GFGKEGRAHYKIGPNSDLVY  
PLGVDRAEMKLQKGECCLLYLKPKY-AFGKEGRKEHDIGSNAELLY  
PLGVDRAEMKLQKGECCLLYLKPKY-AFGKEGRKEHDIGSNAELLY  
PLGVDRAEMKMQKGECCMLYLKPKY-GFGKEGRAQYKIGPNSDLVY  
PLGVDRAEMKLQKGECCLLYLKPKY-AFGKEGRKEHDIGSNAELLY  
PLGVDRAEMKIQKGECCLLYLKPKY-GFGKEGKKEYDIGSNAELLY  
PLGVDRAEMKMQKGECCMLYLKPKY-GFGKDGRAQHKIGPNSDLMY  
PLGVDRAEMKMQKGECCLLYLKPKY-GFGTEGKQYAIQPNANVVY  
PLGVDRAEMKMQKGECCMLYLKPKY-GFGKDGRAQHKIGPNSDLMY  
PLGVDRAEMKMQKGECCMLYLKPKY-GFGKDGRAQHKIGPNSDLMY  
PIGIDKALEKMQRGEHCILYLAPRY-GFGEAGKPKYGIQGNMELVY  
PLGVDRAEMKMQKGECCMLYLKPKY-GFGKEGRAQYKIGPNSDLVY  
PLGVDRAEMKMQKGECCMLYLKPKY-GFGKDGRAQHKIGPNSDLMY  
PLGVDRAEMKMQKGECCMLYLKPKY-GFGKEGRAQYKIGPNSDLVY  
PLGVDRAEMKIQKGECCLLYLKPKY-GFGKEGKKEYDIGSNAELLY  
PLGVDRAEMKMQRGESECELHLKPKY-GFGSEGRPEYKIGPDKDIVY  
PLGVDRAEMKMQRGECCVLYLKPNY-GFGSEGKAEYKIGPDKDIVY  
PIGVDKAVEKMQRGEQCLVHLKSKY-GFGEKGRPEFNIPNCELDY  
PLGVDRAEMKMQRGESECELHLKPKY-GFGSEGRPEYKIGPDKDIVY  
PLGVDRAEMKMQKGECCLLYLKPKY-GFGSEGKPEYKIGPDKDIVY  
PLGVDRAEMKMQRGESECELHLKPKY-GFGSEGRPEYKIGPDKDIVY  
PLGVDRAEMKIQKGECCLLYLKPKY-GFGKEGKKEYDIGSNAELLY  
PIGIDKALEKMQRREEQCILYLGPYR-GFGEAGKPKFGIEPNADLIY  
PHGLEKAIQKMEKSEESVFYLKPNY-GFGSAGKEKFQIPPDDELQY  
PLGVDRAEMKMQRGECCLLYLKPKY-GFGSEGKPEYKVGPDKEIVY  
PLGVDRAEMKMQKSERCVLHLQPKY-GFGSEGQPEFKIGPDKKELEY  
PLGVDRAEMKMQKGECCLLYLKPKY-GFGSEGKPEYKIGPDKDIVY  
PLGVDRAEMKMQKGECCLLYLKPKY-GFGSEGKPEYKIGPDKDIVY  
PLGVDRAEMKMQKGECCLLYLKPKY-GFGSEGKPEYKIGPDKDIVY  
PHGLEKAIQKMEKSEESVFYLKPNY-GFGSAGKEKFQIPPDDELQY  
PVGIEQALQSMKEGEDAMISLKPBY-GFGEAGKSKFIPANASLVY  
PLGVDRAEMKMQKGECCLLYLKPKY-GFGSEGKPEYKIGPDKDIVY  
PPGLEKTIQRMKELEESVIYLKPSY-GFGSAGKEKFQIPPDDELQY  
PHGLEKAIQKMEKSEESVFYLKPNY-GFGSAGKEKFQIPPDDELQY  
PPGLEKTIQRMKELEESVIYLKPSY-GFGSAGKEKFQIPPDDELQY  
PLGVDRAEMKMQRGECCLLYLKPKY-GFGSEGKSEYKVGPDKEIVY  
PLGVDRAEMKMQKGECCLLYLKPKY-GFGSEGKPEYKIGPDKDIVY  
PLGVDRAEMKMQRGECCLLYLKPKY-GFGSEGKPEYKVGPDKEIVY  
PLGVDRAEMKMQRGECCLLYLKPKY-GFGNEGKPEYKVGPDKEIVY  
PLGVDRAEMKMQRGECCLLYLKPKY-GFGNEGKPEYKVGPDKEIVY  
PHGLEKAIQKMEKSEESVFYLKPNY-GFGSAGKEKFQIPPDDELQY  
PLGVDRAEMKMQKGECCLLYLKPKY-GFGKEGKAEYKIGPNAELLY  
PLGVDRAEMKMQRGECCLLYLKPKY-GFGNEGKPEYKVGPDKEIVY  
PLGVDRAEMKMQRGECCLLYLKPKY-GFGSEGKPEYKIGPDKDVVY  
PLGVDRAEMKMQRGECCLLYLKPKY-GFGSEGKPEYKVGPDKEIVY  
PLGVDRAEMKMQKGECCVLYLKPKY-GFGSEGKPEYKIGPDKDVVY  
PHGLEKAIQKMEKLEESVFYLKPNY-GFGSSGKEKFQIPPDDELQY  
PPGLDKAIQKMEKLEECVIYLKPSY-GFGSAGKQKFQIPPDDELQY  
PPGIEMAIQKMEKGEESIFYLKPKY-GFGASGHEKFNIPPDANLQY  
PLGVDRAEMKMQRGECCLLYLKPKY-GFGSEGKPECKIGPDKDVVY  
PPGVEKALQSMKEGEESLITLSPKY-GFGTAGNSQFNIPPDAMLNY  
PIGIDKALEKMQRREEQCILYLGPYR-GFGEAGKPKFGIEP-----  
PPGLEKTIQRMKELEESVIYLKPSY-GFGSAGKEKFQIPPDDELQY  
PLGVDRAEMKMQRGECCVLYLKPKY-GFGSEGKSEYKVGPDKEIVY  
PHGLEKAIQKMEKSEESVFYLKPSY-GFGSTGNEKFQIPPDDELQY  
PHGLEKAIQKMEKSEESVFYLKPSY-GFGSAGNEKFKIPPDDELQY  
PLGVDRAEMKMQKGECCLLQLKPKY-GFGNEGKPEFKIGPDKIEIAY  
PHGLEKAIQKMEKLEESVFYLKPNY-GFGSAGKEKFHIPPDAELQY  
PHGLEKAIQKMEKSEESIFYLKPSY-GFGSTGKEKFQIPPDDELQY  
\* \*\*: : : . . . \* . . : . \* . \* :
