# Supplementary material for: Compression of Large Sets of Sequence Data Reveals Fine Diversification of Functional Profiles in Multigene Families of Proteins: A Study for Peptidyl-Prolyl cis/trans Isomerases (PPIase)
Source: MDPI journal article supplement (doi:10.3390/biom9020059), 2019-02-11
Supplement: s1 [file s1]

Checking of entries from the NCBI database & Blast output. Below is the current list of entries of Fkbp6 and their IDs versus human Fkbp6.

|              |     |     |              |                                                                               |
|--------------|-----|-----|--------------|-------------------------------------------------------------------------------|
| NP_003593    | 2   | 100 | XP_003815624 | inactive peptidyl-prolyl cis-trans isomerase FKBP6 isoform X1 [Pan paniscus]. |
| XP_003777068 | 4   | 100 | XP_003276647 | PREDICTED: inactive peptidyl-prolyl cis-trans isomerase FKBP6 [Nomascus leuco |
| XP_003276647 | 5   | 100 | XP_003895916 | inactive peptidyl-prolyl cis-trans isomerase FKBP6 isoform X1 [Papio anubis]. |
| XP_003895916 | 6   | 100 | EHH17242     | Peptidyl-prolyl cis-trans isomerase FKBP6 [Macaca mulatta].                   |
| EHH17242     | 7   | 100 | XP_001110932 | PREDICTED: inactive peptidyl-prolyl cis-trans isomerase FKBP6 isoform X1 [Mac |
| XP_001110932 | 8   | 100 | XP_011785750 | PREDICTED: inactive peptidyl-prolyl cis-trans isomerase FKBP6 isoform X1 [Col |
| XP_011785750 | 9   | 100 | NP_001128683 | inactive peptidyl-prolyl cis-trans isomerase FKBP6 isoform b [Homo sapiens].  |
| XP_008979905 | 15  | 100 | XP_016868230 | inactive peptidyl-prolyl cis-trans isomerase FKBP6 isoform X1 [Homo sapiens]. |
| XP_012597698 | 18  | 100 | XP_011931834 | PREDICTED: inactive peptidyl-prolyl cis-trans isomerase FKBP6 isoform X2 [Cer |
| XP_011931834 | 19  | 100 | XP_003895917 | inactive peptidyl-prolyl cis-trans isomerase FKBP6 isoform X2 [Papio anubis]. |
| XP_020752493 | 42  | 100 | XP_014988800 | PREDICTED: inactive peptidyl-prolyl cis-trans isomerase FKBP6 isoform X2 [Mac |
| XP_014988800 | 43  | 100 | XP_011785755 | PREDICTED: inactive peptidyl-prolyl cis-trans isomerase FKBP6 isoform X2 [Col |
| XP_007100027 | 76  | 100 | XP_008966786 | inactive peptidyl-prolyl cis-trans isomerase FKBP6 isoform X2 [Pan paniscus]. |
| XP_006859898 | 103 | 100 | XP_005549416 | PREDICTED: inactive peptidyl-prolyl cis-trans isomerase FKBP6 isoform X5 [Mac |
| XP_007468849 | 107 | 100 | XP_014988802 | PREDICTED: inactive peptidyl-prolyl cis-trans isomerase FKBP6 isoform X3 [Mac |
| XP_005344682 | 120 | 100 | NP_001349718 | inactive peptidyl-prolyl cis-trans isomerase FKBP6 isoform d [Homo sapiens].  |
| XP_006971357 | 125 | 100 | XP_008966787 | inactive peptidyl-prolyl cis-trans isomerase FKBP6 isoform X3 [Pan paniscus]. |
| XP_015302699 | 140 | 100 | XP_011765611 | inactive peptidyl-prolyl cis-trans isomerase FKBP6 isoform X7 [Macaca nemestr |
| XP_012597702 | 142 | 100 | XP_014988803 | PREDICTED: inactive peptidyl-prolyl cis-trans isomerase FKBP6 isoform X4 [Mac |
| XP_014403986 | 148 | 100 | XP_016800790 | inactive peptidyl-prolyl cis-trans isomerase FKBP6 isoform X3 [Pan troglodyte |
| XP_007518064 | 154 | 100 | PN192595     | FKBP6 isoform 5, partial [Pan troglodytes].                                   |
| XP_021271278 | 199 | 100 | XP_023074397 | inactive peptidyl-prolyl cis-trans isomerase FKBP6 [Piliocolobus tephrosceles |
| POI24993     | 203 | 100 | PN192596     | FKBP6 isoform 6 [Pan troglodytes].                                            |
| XP_003815624 | 3   | 99  | XP_003777068 | inactive peptidyl-prolyl cis-trans isomerase FKBP6 isoform X1 [Pongo abelii]. |
| NP_001128683 | 10  | 99  | XP_017713171 | PREDICTED: inactive peptidyl-prolyl cis-trans isomerase FKBP6 isoform X1 [Rhi |
| XP_017713171 | 11  | 99  | XP_010385752 | PREDICTED: inactive peptidyl-prolyl cis-trans isomerase FKBP6 isoform X1 [Rhi |
| XP_010385752 | 12  | 99  | XP_002817917 | inactive peptidyl-prolyl cis-trans isomerase FKBP6 isoform X2 [Pongo abelii]. |
| XP_002817917 | 13  | 99  | XP_004045599 | PREDICTED: inactive peptidyl-prolyl cis-trans isomerase FKBP6 isoform X1 [Gor |
| XP_003895917 | 20  | 99  | XP_008016547 | PREDICTED: LOW QUALITY PROTEIN: inactive peptidyl-prolyl cis-trans isomerase  |
| XP_022357643 | 25  | 99  | XP_010385754 | PREDICTED: inactive peptidyl-prolyl cis-trans isomerase FKBP6 isoform X3 [Rhi |
| XP_021563404 | 129 | 99  | XP_018887307 | PREDICTED: inactive peptidyl-prolyl cis-trans isomerase FKBP6 isoform X2 [Gor |
| XP_004761713 | 162 | 99  | PNJ85878     | FKBP6 isoform 5, partial [Pongo abelii].                                      |
| XP_010283169 | 206 | 99  | PNJ85879     | FKBP6 isoform 6 [Pongo abelii].                                               |
| XP_019715044 | 361 | 98  | XP_018875413 | PREDICTED: uncharacterized protein LOC101136274 isoform X1 [Gorilla gorilla g |
| XP_016868230 | 16  | 96  | XP_003794239 | inactive peptidyl-prolyl cis-trans isomerase FKBP6 isoform X1 [Otolemur garne |
| XP_003794239 | 17  | 95  | XP_012597698 | inactive peptidyl-prolyl cis-trans isomerase FKBP6 isoform X1 [Microcebus mur |
| XP_010385754 | 26  | 95  | XP_017895560 | PREDICTED: inactive peptidyl-prolyl cis-trans isomerase FKBP6 isoform X2 [Cap |
| XP_017895560 | 27  | 95  | XP_005892900 | PREDICTED: inactive peptidyl-prolyl cis-trans isomerase FKBP6 isoform X2 [Bos |
| XP_005892900 | 28  | 95  | XP_010852603 | PREDICTED: inactive peptidyl-prolyl cis-trans isomerase FKBP6 isoform X2 [Bis |
| XP_010852603 | 29  | 95  | XP_546928    | inactive peptidyl-prolyl cis-trans isomerase FKBP6 [Canis lupus familiaris].  |
| XP_546928    | 30  | 95  | XP_005225237 | inactive peptidyl-prolyl cis-trans isomerase FKBP6 isoform X1 [Bos taurus].   |
| XP_005225237 | 31  | 95  | XP_021556246 | inactive peptidyl-prolyl cis-trans isomerase FKBP6 isoform X1 [Neomonachus sc |
| XP_021556246 | 32  | 95  | XP_011978492 | PREDICTED: inactive peptidyl-prolyl cis-trans isomerase FKBP6 isoform X1 [Ovi |
| XP_011978492 | 33  | 95  | NP_001296390 | inactive peptidyl-prolyl cis-trans isomerase FKBP6 [Equus caballus].          |
| NP_001296390 | 34  | 95  | XP_011959859 | PREDICTED: inactive peptidyl-prolyl cis-trans isomerase FKBP6 isoform X1 [Ovi |
| XP_011959859 | 35  | 95  | XP_006942097 | inactive peptidyl-prolyl cis-trans isomerase FKBP6 [Felis catus].             |
| XP_019277206 | 39  | 95  | XP_014705926 | PREDICTED: inactive peptidyl-prolyl cis-trans isomerase FKBP6 [Equus asinus]. |
| XP_014705926 | 40  | 95  | XP_008540619 | PREDICTED: inactive peptidyl-prolyl cis-trans isomerase FKBP6 [Equus przewals |
| XP_008540619 | 41  | 95  | XP_020752493 | inactive peptidyl-prolyl cis-trans isomerase FKBP6 isoform X1 [Odocoileus vir |
| XP_014652016 | 52  | 95  | XP_012597701 | inactive peptidyl-prolyl cis-trans isomerase FKBP6 isoform X2 [Microcebus mur |
| XP_004317177 | 55  | 95  | AMY15662     | FK506 binding protein 6 [Bos grunniens].                                      |
| AMY15662     | 56  | 95  | XP_005892901 | PREDICTED: inactive peptidyl-prolyl cis-trans isomerase FKBP6 isoform X1 [Bos |
| XP_005892901 | 57  | 95  | XP_017895559 | PREDICTED: inactive peptidyl-prolyl cis-trans isomerase FKBP6 isoform X1 [Cap |
| XP_005662030 | 59  | 95  | XP_010852604 | PREDICTED: inactive peptidyl-prolyl cis-trans isomerase FKBP6 isoform X3 [Bis |
| XP_010852604 | 60  | 95  | XP_010852602 | PREDICTED: inactive peptidyl-prolyl cis-trans isomerase FKBP6 isoform X1 [Bis |
| EPY83956     | 62  | 95  | NP_001095679 | inactive peptidyl-prolyl cis-trans isomerase FKBP6 [Bos taurus].              |
| XP_010970644 | 65  | 95  | XP_004021020 | PREDICTED: inactive peptidyl-prolyl cis-trans isomerase FKBP6 isoform X2 [Ovi |
| XP_006057167 | 70  | 95  | XP_019843968 | PREDICTED: inactive peptidyl-prolyl cis-trans isomerase FKBP6 [Bos indicus].  |
| XP_006088351 | 79  | 95  | XP_020752496 | inactive peptidyl-prolyl cis-trans isomerase FKBP6 isoform X2 [Odocoileus vir |

|              |     |                 |                                                                                          |
|--------------|-----|-----------------|------------------------------------------------------------------------------------------|
| XP_014411577 | 93  | 95 XP_007073943 | PREDICTED: inactive peptidyl-prolyl cis-trans isomerase FKBP6 [Panthera tigris]          |
| XP_006155025 | 95  | 95 XP_005328656 | inactive peptidyl-prolyl cis-trans isomerase FKBP6 [Ictidomys tridecemlineatus]          |
| XP_011765611 | 141 | 95 XP_012597702 | inactive peptidyl-prolyl cis-trans isomerase FKBP6 isoform X3 [Microcebus murinus]       |
| XP_003934167 | 22  | 94 XP_012495716 | PREDICTED: inactive peptidyl-prolyl cis-trans isomerase FKBP6 isoform X1 [Proteridops h] |
| XP_007100028 | 37  | 94 XP_005972253 | PREDICTED: peptidyl-prolyl cis-trans isomerase FKBP6 isoform X2 [Pantholops h]           |
| XP_005972253 | 38  | 94 XP_019277206 | PREDICTED: inactive peptidyl-prolyl cis-trans isomerase FKBP6 [Panthera pardus]          |
| XP_008979887 | 46  | 94 XP_004399150 | PREDICTED: inactive peptidyl-prolyl cis-trans isomerase FKBP6 isoform X1 [Odo]           |
| XP_007186614 | 51  | 94 XP_014652016 | PREDICTED: inactive peptidyl-prolyl cis-trans isomerase FKBP6 [Ceratotherium]            |
| XP_012597701 | 53  | 94 XP_004761711 | PREDICTED: inactive peptidyl-prolyl cis-trans isomerase FKBP6 isoform X1 [Mus]           |
| XP_017895559 | 58  | 94 XP_005662030 | inactive peptidyl-prolyl cis-trans isomerase FKBP6 isoform X1 [Sus scrofa].              |
| XP_010342933 | 69  | 94 XP_006057167 | PREDICTED: peptidyl-prolyl cis-trans isomerase FKBP6 [Bubalus bubalis].                  |
| XP_006201442 | 72  | 94 XP_005972252 | PREDICTED: peptidyl-prolyl cis-trans isomerase FKBP6 isoform X1 [Pantholops h]           |
| XP_005344683 | 101 | 94 XP_020941978 | inactive peptidyl-prolyl cis-trans isomerase FKBP6 isoform X2 [Sus scrofa].              |
| XP_014425414 | 161 | 94 XP_004761713 | PREDICTED: inactive peptidyl-prolyl cis-trans isomerase FKBP6 isoform X2 [Mus]           |
| XP_020488061 | 346 | 94 XP_015332442 | PREDICTED: inactive peptidyl-prolyl cis-trans isomerase FKBP6, partial [Marmo]           |
| XP_004045599 | 14  | 93 XP_008979905 | PREDICTED: inactive peptidyl-prolyl cis-trans isomerase FKBP6 isoform X2 [Cal]           |
| XP_008016547 | 21  | 93 XP_003934167 | PREDICTED: inactive peptidyl-prolyl cis-trans isomerase FKBP6 isoform X1 [Sai]           |
| XP_012495716 | 23  | 93 XP_012304459 | inactive peptidyl-prolyl cis-trans isomerase FKBP6 isoform X1 [Aotus nancymaa]           |
| XP_012304459 | 24  | 93 XP_022357643 | inactive peptidyl-prolyl cis-trans isomerase FKBP6 isoform X1 [Enhydra lutris]           |
| XP_022444356 | 45  | 93 XP_008979887 | PREDICTED: inactive peptidyl-prolyl cis-trans isomerase FKBP6 isoform X1 [Cal]           |
| XP_004268847 | 48  | 93 XP_019659608 | PREDICTED: inactive peptidyl-prolyl cis-trans isomerase FKBP6 [Ailuropoda mel]           |
| XP_024602986 | 50  | 93 XP_007186614 | PREDICTED: peptidyl-prolyl cis-trans isomerase FKBP6 isoform X1 [Balaenoptera]           |
| XP_004021020 | 66  | 93 XP_015450070 | inactive peptidyl-prolyl cis-trans isomerase FKBP6 [Pteropus alecto].                    |
| XP_015450070 | 67  | 93 XP_017516100 | PREDICTED: inactive peptidyl-prolyl cis-trans isomerase FKBP6 [Manis javanica]           |
| XP_017516100 | 68  | 93 XP_010342933 | PREDICTED: inactive peptidyl-prolyl cis-trans isomerase FKBP6 isoform X2 [Sai]           |
| XP_005972252 | 73  | 93 XP_004380900 | inactive peptidyl-prolyl cis-trans isomerase FKBP6 [Trichechus manatus latiro]           |
| XP_004380900 | 74  | 93 XP_007468850 | PREDICTED: peptidyl-prolyl cis-trans isomerase FKBP6 isoform X2 [Lipotes vexi]           |
| XP_008966786 | 77  | 93 XP_020017458 | inactive peptidyl-prolyl cis-trans isomerase FKBP6 [Castor canadensis].                  |
| XP_006773483 | 82  | 93 XP_012304461 | inactive peptidyl-prolyl cis-trans isomerase FKBP6 isoform X3 [Aotus nancymaa]           |
| XP_016054558 | 85  | 93 XP_011369980 | inactive peptidyl-prolyl cis-trans isomerase FKBP6 [Pteropus vampyrus].                  |
| XP_007073943 | 94  | 93 XP_006155025 | PREDICTED: inactive peptidyl-prolyl cis-trans isomerase FKBP6 isoform X1 [Tup]           |
| XP_005549416 | 104 | 93 XP_024427494 | inactive peptidyl-prolyl cis-trans isomerase FKBP6 [Desmodus rotundus].                  |
| XP_016001971 | 106 | 93 XP_007468849 | PREDICTED: peptidyl-prolyl cis-trans isomerase FKBP6 isoform X1 [Lipotes vexi]           |
| XP_004620930 | 111 | 93 XP_008696858 | PREDICTED: inactive peptidyl-prolyl cis-trans isomerase FKBP6 [Ursus maritimu]           |
| NP_01099392  | 122 | 93 XP_005396843 | PREDICTED: inactive peptidyl-prolyl cis-trans isomerase FKBP6 [Chinchilla lan]           |
| XP_023420891 | 137 | 93 XP_006155027 | PREDICTED: inactive peptidyl-prolyl cis-trans isomerase FKBP6 isoform X2 [Tup]           |
| XP_004630630 | 146 | 93 XP_004840130 | inactive peptidyl-prolyl cis-trans isomerase FKBP6 isoform X1 [Heterocephalus]           |
| XP_016800790 | 149 | 93 ELK06863     | FK506-binding protein 6 [Pteropus alecto].                                               |
| ELK06863     | 150 | 93 EHB08283     | FK506-binding protein 6 [Heterocephalus glaber].                                         |
| EHB08283     | 151 | 93 XP_004706046 | PREDICTED: inactive peptidyl-prolyl cis-trans isomerase FKBP6 [Echinops telfa]           |
| XP_004706046 | 152 | 93 XP_021110082 | inactive peptidyl-prolyl cis-trans isomerase FKBP6 isoform X2 [Heterocephalus]           |
| XP_010306733 | 231 | 93 XP_008979919 | PREDICTED: inactive peptidyl-prolyl cis-trans isomerase FKBP6 isoform X3 [Cal]           |
| XP_019619874 | 398 | 93 XP_016801711 | inactive peptidyl-prolyl cis-trans isomerase FKBP6-like isoform X3 [Pan trogl]           |
| XP_011785755 | 44  | 92 XP_022444356 | inactive peptidyl-prolyl cis-trans isomerase FKBP6 isoform X2 [Delphinapterus]           |
| XP_010852602 | 61  | 92 EPY83956     | peptidyl-prolyl cis-trans isomerase FKBP6 [Camelus ferus].                               |
| XP_008139950 | 64  | 92 XP_010970644 | PREDICTED: inactive peptidyl-prolyl cis-trans isomerase FKBP6 [Camelus bactri]           |
| XP_019843968 | 71  | 92 XP_006201442 | PREDICTED: inactive peptidyl-prolyl cis-trans isomerase FKBP6 [Vicugna pacos]            |
| XP_020752496 | 80  | 92 XP_022444355 | inactive peptidyl-prolyl cis-trans isomerase FKBP6 isoform X1 [Delphinapterus]           |
| XP_024602987 | 88  | 92 XP_019610492 | PREDICTED: inactive peptidyl-prolyl cis-trans isomerase FKBP6 [Rhinolophus si]           |
| XP_006889852 | 91  | 92 XP_007940604 | PREDICTED: inactive peptidyl-prolyl cis-trans isomerase FKBP6 [Orycteropus af]           |
| XP_007940604 | 92  | 92 XP_014411577 | PREDICTED: inactive peptidyl-prolyl cis-trans isomerase FKBP6 [Camelus ferus]            |
| XP_010979058 | 98  | 92 XP_006249193 | PREDICTED: inactive peptidyl-prolyl cis-trans isomerase FKBP6 isoform X2 [Rat]           |
| XP_002722023 | 100 | 92 XP_005344683 | PREDICTED: inactive peptidyl-prolyl cis-trans isomerase FKBP6 isoform X2 [Mic]           |
| XP_012584338 | 109 | 92 XP_006971358 | PREDICTED: inactive peptidyl-prolyl cis-trans isomerase FKBP6 isoform X2 [Per]           |
| XP_008696858 | 112 | 92 EGW01828     | FK506-binding protein 6 [Cricetulus griseus].                                            |
| XP_021018812 | 114 | 92 XP_012782940 | PREDICTED: inactive peptidyl-prolyl cis-trans isomerase FKBP6 [Ochotona princ]           |
| XP_012782940 | 115 | 92 XP_019502388 | PREDICTED: inactive peptidyl-prolyl cis-trans isomerase FKBP6 isoform X1 [Hip]           |
| XP_019502388 | 116 | 92 XP_021042681 | inactive peptidyl-prolyl cis-trans isomerase FKBP6 isoform X2 [Mus pahari].              |
| XP_021519217 | 119 | 92 XP_005344682 | PREDICTED: inactive peptidyl-prolyl cis-trans isomerase FKBP6 isoform X1 [Mic]           |
| NP_001349718 | 121 | 92 NP_001099392 | inactive peptidyl-prolyl cis-trans isomerase FKBP6 [Rattus norvegicus].                  |
| XP_005396843 | 123 | 92 XP_019502390 | PREDICTED: inactive peptidyl-prolyl cis-trans isomerase FKBP6 isoform X2 [Hip]           |

|              |     |                  |                                                                               |
|--------------|-----|------------------|-------------------------------------------------------------------------------|
| XP_019502390 | 124 | 92 XP_006971357  | PREDICTED: inactive peptidyl-prolyl cis-trans isomerase FKBP6 isoform X1 [Per |
| XP_008966787 | 126 | 92 XP_003500991  | PREDICTED: inactive peptidyl-prolyl cis-trans isomerase FKBP6 [Cricetulus gri |
| NP_291049    | 133 | 92 XP_021042679  | inactive peptidyl-prolyl cis-trans isomerase FKBP6 isoform X1 [Mus pahari].   |
| XP_021042679 | 134 | 92 XP_010617304  | PREDICTED: inactive peptidyl-prolyl cis-trans isomerase FKBP6 isoform X1 [Fuk |
| XP_014988803 | 143 | 92 XP_010617307  | PREDICTED: inactive peptidyl-prolyl cis-trans isomerase FKBP6 isoform X2 [Fuk |
| XP_004666244 | 145 | 92 XP_004630630  | inactive peptidyl-prolyl cis-trans isomerase FKBP6 [Octodon degus].           |
| XP_006258869 | 174 | 92 XP_005344684  | PREDICTED: inactive peptidyl-prolyl cis-trans isomerase FKBP6 isoform X3 [Mic |
| NP_001264822 | 185 | 92 XP_021042683  | inactive peptidyl-prolyl cis-trans isomerase FKBP6 isoform X4 [Mus pahari].   |
| XP_010211497 | 209 | 92 XP_017388864  | PREDICTED: inactive peptidyl-prolyl cis-trans isomerase FKBP6 [Cebus capucinu |
| XP_009901738 | 224 | 92 XP_012887159  | PREDICTED: inactive peptidyl-prolyl cis-trans isomerase FKBP6 [Dipodomys ordi |
| XP_006942097 | 36  | 91 XP_007100028  | inactive peptidyl-prolyl cis-trans isomerase FKBP6 isoform X2 [Physeter catod |
| XP_004399150 | 47  | 91 XP_004268847  | PREDICTED: inactive peptidyl-prolyl cis-trans isomerase FKBP6 isoform X1 [Orc |
| XP_019659608 | 49  | 91 XP_024602986  | inactive peptidyl-prolyl cis-trans isomerase FKBP6 isoform X1 [Neophocaena as |
| XP_004761711 | 54  | 91 XP_004317177  | PREDICTED: inactive peptidyl-prolyl cis-trans isomerase FKBP6 isoform X1 [Tur |
| XP_007468850 | 75  | 91 XP_007100027  | inactive peptidyl-prolyl cis-trans isomerase FKBP6 isoform X1 [Physeter catod |
| XP_020017458 | 78  | 91 XP_006088351  | inactive peptidyl-prolyl cis-trans isomerase FKBP6 [Myotis lucifugus].        |
| XP_022444355 | 81  | 91 XP_006773483  | PREDICTED: inactive peptidyl-prolyl cis-trans isomerase FKBP6 [Myotis davidii |
| XP_012304461 | 83  | 91 XP_008591583  | PREDICTED: inactive peptidyl-prolyl cis-trans isomerase FKBP6 [Galeopterus va |
| XP_008591583 | 84  | 91 XP_016054558  | PREDICTED: inactive peptidyl-prolyl cis-trans isomerase FKBP6 [Miniopterus na |
| XP_011369980 | 86  | 91 XP_004268849  | PREDICTED: inactive peptidyl-prolyl cis-trans isomerase FKBP6 isoform X2 [Orc |
| XP_004268849 | 87  | 91 XP_024602987  | inactive peptidyl-prolyl cis-trans isomerase FKBP6 isoform X2 [Neophocaena as |
| XP_019610492 | 89  | 91 XP_004317179  | PREDICTED: inactive peptidyl-prolyl cis-trans isomerase FKBP6 isoform X2 [Tur |
| XP_011765609 | 97  | 91 XP_010979058  | PREDICTED: inactive peptidyl-prolyl cis-trans isomerase FKBP6 [Camelus dromed |
| XP_006249193 | 99  | 91 XP_0027222023 | PREDICTED: inactive peptidyl-prolyl cis-trans isomerase FKBP6 [Oryctolagus cu |
| XP_020941978 | 102 | 91 XP_006859898  | PREDICTED: peptidyl-prolyl cis-trans isomerase FKBP6 [Chrysochloris asiatica] |
| EGW01828     | 113 | 91 XP_021018812  | inactive peptidyl-prolyl cis-trans isomerase FKBP6 isoform X2 [Mus caroli].   |
| NP_001264821 | 118 | 91 XP_021519217  | inactive peptidyl-prolyl cis-trans isomerase FKBP6 isoform X2 [Meriones ungui |
| XP_018887307 | 130 | 91 XP_021018806  | inactive peptidyl-prolyl cis-trans isomerase FKBP6 isoform X1 [Mus caroli].   |
| XP_010617304 | 135 | 91 XP_021519216  | inactive peptidyl-prolyl cis-trans isomerase FKBP6 isoform X1 [Meriones ungui |
| KY033272     | 182 | 91 XP_021018814  | inactive peptidyl-prolyl cis-trans isomerase FKBP6 isoform X3 [Mus caroli].   |
| XP_021042683 | 186 | 91 XP_021519218  | inactive peptidyl-prolyl cis-trans isomerase FKBP6 isoform X3 [Meriones ungui |
| NP_001095679 | 63  | 90 XP_008139950  | PREDICTED: inactive peptidyl-prolyl cis-trans isomerase FKBP6 [Eptesicus fusc |
| XP_004317179 | 90  | 90 XP_006889852  | PREDICTED: peptidyl-prolyl cis-trans isomerase FKBP6 [Elephantulus edwardii]. |
| XP_024427494 | 105 | 90 XP_016001971  | PREDICTED: inactive peptidyl-prolyl cis-trans isomerase FKBP6 [Rousettus aegy |
| XP_014988802 | 108 | 90 XP_012584338  | PREDICTED: inactive peptidyl-prolyl cis-trans isomerase FKBP6 [Condylura cris |
| XP_006971358 | 110 | 90 XP_004620930  | PREDICTED: inactive peptidyl-prolyl cis-trans isomerase FKBP6 [Sorex araneus] |
| XP_021042681 | 117 | 90 NP_001264821  | inactive peptidyl-prolyl cis-trans isomerase FKBP6 isoform 2 [Mus musculus].  |
| XP_003500991 | 127 | 90 XP_008846596  | PREDICTED: inactive peptidyl-prolyl cis-trans isomerase FKBP6 [Nannospalax ga |
| XP_021018806 | 131 | 90 XP_017176678  | PREDICTED: inactive peptidyl-prolyl cis-trans isomerase FKBP6 isoform X2 [Mus |
| XP_017176678 | 132 | 90 NP_291049     | inactive peptidyl-prolyl cis-trans isomerase FKBP6 isoform 1 [Mus musculus].  |
| XP_010617307 | 144 | 90 XP_004666244  | PREDICTED: inactive peptidyl-prolyl cis-trans isomerase FKBP6 [Jaculus jaculu |
| XP_021018814 | 183 | 90 OBS57796      | hypothetical protein A6R68_11069 [Neotoma lepida].                            |
| OBS57796     | 184 | 90 NP_001264822  | inactive peptidyl-prolyl cis-trans isomerase FKBP6 isoform 3 [Mus musculus].  |
| XP_021110082 | 153 | 89 XP_007518064  | PREDICTED: inactive peptidyl-prolyl cis-trans isomerase FKBP6 [Erinaceus euro |
| XP_008846596 | 128 | 87 XP_021563404  | inactive peptidyl-prolyl cis-trans isomerase FKBP6 [Carlito syrichta].        |
| PNI92595     | 155 | 87 XP_020861399  | inactive peptidyl-prolyl cis-trans isomerase FKBP6 isoform X1 [Phascolarctos  |
| XP_001519210 | 159 | 87 XP_020861404  | inactive peptidyl-prolyl cis-trans isomerase FKBP6 isoform X2 [Phascolarctos  |
| XP_021519216 | 136 | 86 XP_023420891  | LOW QUALITY PROTEIN: inactive peptidyl-prolyl cis-trans isomerase FKBP6 [Cavi |
| XP_020861399 | 156 | 86 XP_016284889  | PREDICTED: inactive peptidyl-prolyl cis-trans isomerase FKBP6 isoform X2 [Mon |
| XP_016284889 | 157 | 86 XP_016284888  | PREDICTED: inactive peptidyl-prolyl cis-trans isomerase FKBP6 isoform X1 [Mon |
| XP_006155027 | 138 | 84 XP_011765605  | inactive peptidyl-prolyl cis-trans isomerase FKBP6 isoform X1 [Macaca nemestr |
| XP_011765605 | 139 | 84 XP_015302699  | PREDICTED: inactive peptidyl-prolyl cis-trans isomerase FKBP6 isoform X1 [Mac |
| XP_021519218 | 187 | 84 XP_024653358  | inactive peptidyl-prolyl cis-trans isomerase FKBP6 isoform X3 [Macaca nemestr |
| XP_009678488 | 189 | 84 XP_015302701  | PREDICTED: inactive peptidyl-prolyl cis-trans isomerase FKBP6 isoform X2 [Mac |
| PNJ85878     | 163 | 82 XP_007441600  | inactive peptidyl-prolyl cis-trans isomerase FKBP6 [Python bivittatus].       |
| XP_005328656 | 96  | 78 XP_011765609  | inactive peptidyl-prolyl cis-trans isomerase FKBP6 isoform X5 [Macaca nemestr |
| XP_016284888 | 158 | 78 XP_001519210  | PREDICTED: inactive peptidyl-prolyl cis-trans isomerase FKBP6 isoform X2 [Orn |
| XP_007441600 | 164 | 78 XP_016080873  | PREDICTED: inactive peptidyl-prolyl cis-trans isomerase FKBP6 isoform X1 [Orn |
| XP_005344684 | 175 | 78 XP_015670323  | PREDICTED: inactive peptidyl-prolyl cis-trans isomerase FKBP6 [Protobothrops  |
| XP_019401968 | 168 | 77 XP_013926437  | PREDICTED: inactive peptidyl-prolyl cis-trans isomerase FKBP6 isoform X1 [Tha |
| XP_019401969 | 170 | 77 EMP30541      | Peptidyl-prolyl cis-trans isomerase FKBP6, partial [Chelonia mydas].          |

|               |     |                 |                                                                               |
|---------------|-----|-----------------|-------------------------------------------------------------------------------|
| XP_020662988  | 177 | 77 XP_007065519 | PREDICTED: peptidyl-prolyl cis-trans isomerase FKBP6 [Chelonia mydas].        |
| XP_003770271  | 191 | 77 ETE73718     | Peptidyl-prolyl cis-trans isomerase FKBP6, partial [Ophiophagus hannah].      |
| XP_020861404  | 160 | 76 XP_014425414 | inactive peptidyl-prolyl cis-trans isomerase FKBP6, partial [Pelodiscus sinen |
| XP_019365238  | 167 | 76 XP_019401968 | PREDICTED: inactive peptidyl-prolyl cis-trans isomerase FKBP6 isoform X1 [Cro |
| XP_013926437  | 169 | 76 XP_019401969 | PREDICTED: inactive peptidyl-prolyl cis-trans isomerase FKBP6 isoform X2 [Cro |
| EMP30541      | 171 | 76 XP_015269029 | PREDICTED: inactive peptidyl-prolyl cis-trans isomerase FKBP6 [Gekko japonicu |
| XP_015670323  | 176 | 76 XP_020662988 | inactive peptidyl-prolyl cis-trans isomerase FKBP6 isoform X1 [Pogona vittice |
| XP_007065519  | 178 | 76 XP_020662989 | inactive peptidyl-prolyl cis-trans isomerase FKBP6 isoform X2 [Pogona vittice |
| XP_020662989  | 179 | 76 XP_020662990 | inactive peptidyl-prolyl cis-trans isomerase FKBP6 isoform X3 [Pogona vittice |
| XP_009486380  | 229 | 76 KGL76252     | Peptidyl-prolyl cis-trans isomerase FKBP6, partial [Tinamus guttatus].        |
| XP_004840130  | 147 | 75 XP_014403986 | PREDICTED: inactive peptidyl-prolyl cis-trans isomerase FKBP6 [Myotis brandti |
| XP_015269029  | 172 | 75 XP_014464913 | PREDICTED: inactive peptidyl-prolyl cis-trans isomerase FKBP6 isoform X2 [All |
| XP_014464913  | 173 | 75 XP_006258869 | PREDICTED: inactive peptidyl-prolyl cis-trans isomerase FKBP6 isoform X1 [All |
| XP_025051231  | 181 | 75 KYO33272     | inactive peptidyl-prolyl cis-trans isomerase FKBP6 [Alligator mississippiensi |
| 3B7X_A        | 369 | 75 XP_014403985 | PREDICTED: inactive peptidyl-prolyl cis-trans isomerase FKBP6-like [Myotis br |
| XP_016080873  | 165 | 74 XP_024066689 | inactive peptidyl-prolyl cis-trans isomerase FKBP6 isoform X1 [Terrapene mexi |
| XP_024066689  | 166 | 74 XP_019365238 | PREDICTED: inactive peptidyl-prolyl cis-trans isomerase FKBP6, partial [Gavia |
| XP_020662990  | 180 | 74 XP_025051231 | inactive peptidyl-prolyl cis-trans isomerase FKBP6, partial [Alligator sinens |
| KFQ39479      | 242 | 72 EOB04024     | FK506-binding protein 6, partial [Anas platyrhynchos].                        |
| XP_024653358  | 188 | 71 XP_009678488 | PREDICTED: inactive peptidyl-prolyl cis-trans isomerase FKBP6 [Struthio camel |
| ETE73718      | 192 | 71 NP_989052    | inactive peptidyl-prolyl cis-trans isomerase FKBP6 [Xenopus tropicalis].      |
| XP_010584273  | 196 | 71 XP_017946629 | PREDICTED: inactive peptidyl-prolyl cis-trans isomerase FKBP6 isoform X1 [Xen |
| XP_017946629  | 197 | 71 XP_008109385 | PREDICTED: inactive peptidyl-prolyl cis-trans isomerase FKBP6 isoform X1 [Ano |
| XP_017388864  | 210 | 71 XP_008109386 | PREDICTED: inactive peptidyl-prolyl cis-trans isomerase FKBP6 isoform X2 [Ano |
| XP_014342809  | 212 | 71 KfV84016     | Peptidyl-prolyl cis-trans isomerase FKBP6, partial [Struthio camelus australi |
| XP_015302701  | 190 | 70 XP_003770271 | inactive peptidyl-prolyl cis-trans isomerase FKBP6 [Sarcophilus harrisii].    |
| NP_989052     | 193 | 70 NP_001085204 | FK506 binding protein 6 L homeolog [Xenopus laevis].                          |
| XP_015151391  | 201 | 70 XP_018100492 | PREDICTED: FK506 binding protein 6 L homeolog isoform X1 [Xenopus laevis].    |
| XP_008944700  | 246 | 70 KFP93140     | Peptidyl-prolyl cis-trans isomerase FKBP6, partial [Haliaeetus albicilla].    |
| KFW03341      | 265 | 70 KfV99355     | Peptidyl-prolyl cis-trans isomerase FKBP6, partial [Fulmarus glacialis].      |
| XP_009643249  | 215 | 69 XP_009928379 | PREDICTED: inactive peptidyl-prolyl cis-trans isomerase FKBP6, partial [Halia |
| XP_009512874  | 220 | 69 XP_009586283 | PREDICTED: inactive peptidyl-prolyl cis-trans isomerase FKBP6, partial [Fulma |
| KFZ64979      | 258 | 69 KFW73903     | Peptidyl-prolyl cis-trans isomerase FKBP6, partial [Phalacrocorax carbo].     |
| XP_019903677  | 269 | 69 KFU91562     | Peptidyl-prolyl cis-trans isomerase FKBP6, partial [Chaetura pelagica].       |
| XP_021479427  | 293 | 69 KFR16943     | Peptidyl-prolyl cis-trans isomerase FKBP6, partial [Opisthocomus hoazin].     |
| XP_005449738  | 336 | 69 KfV20040     | Peptidyl-prolyl cis-trans isomerase FKBP6, partial [Tauraco erythrolophus].   |
| XP_009807780  | 219 | 68 XP_009512874 | PREDICTED: inactive peptidyl-prolyl cis-trans isomerase FKBP6, partial [Phala |
| XP_009557002  | 245 | 68 XP_008944700 | PREDICTED: inactive peptidyl-prolyl cis-trans isomerase FKBP6, partial [Merop |
| KFP21064      | 257 | 68 KFZ64979     | Peptidyl-prolyl cis-trans isomerase FKBP6, partial [Podiceps cristatus].      |
| XP_018958370  | 288 | 68 KGL96380     | Peptidyl-prolyl cis-trans isomerase FKBP6, partial [Charadrius vociferus].    |
| XP_014327714  | 363 | 68 XP_009081377 | PREDICTED: inactive peptidyl-prolyl cis-trans isomerase FKBP6, partial [Acant |
| XP_020570386  | 385 | 68 KFP89108     | Peptidyl-prolyl cis-trans isomerase FKBP6, partial [Acanthisitta chloris].    |
| PNJ85879      | 207 | 67 XP_018412624 | PREDICTED: inactive peptidyl-prolyl cis-trans isomerase FKBP6, partial [Nanor |
| XP_008109386  | 211 | 67 XP_014342809 | PREDICTED: inactive peptidyl-prolyl cis-trans isomerase FKBP6 [Latimeria chal |
| XP_009321903  | 218 | 67 XP_009807780 | PREDICTED: inactive peptidyl-prolyl cis-trans isomerase FKBP6, partial [Gavia |
| KFQ72829      | 222 | 67 XP_009698973 | PREDICTED: inactive peptidyl-prolyl cis-trans isomerase FKBP6, partial [Caria |
| XP_0098887190 | 228 | 67 XP_009486380 | PREDICTED: inactive peptidyl-prolyl cis-trans isomerase FKBP6, partial [Pelec |
| XP_010194269  | 238 | 67 XP_009962683 | PREDICTED: inactive peptidyl-prolyl cis-trans isomerase FKBP6, partial [Tyto  |
| XP_010143455  | 251 | 67 KFQ87275     | Peptidyl-prolyl cis-trans isomerase FKBP6, partial [Phoenicopterus ruber rube |
| XP_009863922  | 254 | 67 KFW66808     | Peptidyl-prolyl cis-trans isomerase FKBP6, partial [Pygoscelis adeliae].      |
| XP_018591809  | 256 | 67 KFP21064     | Peptidyl-prolyl cis-trans isomerase FKBP6, partial [Egretta garzetta].        |
| KFW73903      | 259 | 67 KFM05579     | Peptidyl-prolyl cis-trans isomerase FKBP6, partial [Aptenodytes forsteri].    |
| XP_016346087  | 263 | 67 KfV51798     | Peptidyl-prolyl cis-trans isomerase FKBP6, partial [Gavia stellata].          |
| AAH54673      | 286 | 67 KFP60963     | Peptidyl-prolyl cis-trans isomerase FKBP6, partial [Cariama cristata].        |
| XP_016350445  | 304 | 67 KfV47875     | Peptidyl-prolyl cis-trans isomerase FKBP6, partial [Tyto alba].               |
| XP_021479426  | 307 | 67 KFQ96759     | Peptidyl-prolyl cis-trans isomerase FKBP6, partial [Nipponia nippon].         |
| XP_005449737  | 349 | 67 KFO61461     | Peptidyl-prolyl cis-trans isomerase FKBP6, partial [Corvus brachyrhynchos].   |
| NP_001085204  | 194 | 66 XP_011592867 | PREDICTED: inactive peptidyl-prolyl cis-trans isomerase FKBP6 [Aquila chrysa  |
| XP_011592867  | 195 | 66 XP_010584273 | PREDICTED: inactive peptidyl-prolyl cis-trans isomerase FKBP6 [Haliaeetus leu |
| XP_008109385  | 198 | 66 XP_021271278 | inactive peptidyl-prolyl cis-trans isomerase FKBP6 [Numida meleagris].        |
| XP_009698973  | 223 | 66 XP_009901738 | PREDICTED: inactive peptidyl-prolyl cis-trans isomerase FKBP6, partial [Picoi |

|              |     |                 |                                                                               |
|--------------|-----|-----------------|-------------------------------------------------------------------------------|
| XP_009940812 | 226 | 66 XP_002187983 | PREDICTED: inactive peptidyl-prolyl cis-trans isomerase FKBP6 [Taeniopygia gu |
| KGL76252     | 230 | 66 XP_010306733 | PREDICTED: inactive peptidyl-prolyl cis-trans isomerase FKBP6, partial [Balea |
| KFP29338     | 240 | 66 XP_010147897 | PREDICTED: inactive peptidyl-prolyl cis-trans isomerase FKBP6 [Eurypyga helia |
| XP_021396070 | 250 | 66 XP_010143455 | PREDICTED: inactive peptidyl-prolyl cis-trans isomerase FKBP6, partial [Bucer |
| KFM05579     | 260 | 66 KfV69563     | Peptidyl-prolyl cis-trans isomerase FKBP6, partial [Picoides pubescens].      |
| KFV16869     | 296 | 66 KFO13846     | Peptidyl-prolyl cis-trans isomerase FKBP6, partial [Balearica regulorum gibbe |
| XP_005808385 | 340 | 66 KFO85715     | Peptidyl-prolyl cis-trans isomerase FKBP6, partial [Buceros rhinoceros silves |
| XP_007561093 | 353 | 66 PKU35662     | peptidyl-prolyl cis-trans isomerase hypothetical protein [Limosa lapponica ba |
| XP_010022120 | 236 | 65 XP_010083598 | PREDICTED: inactive peptidyl-prolyl cis-trans isomerase FKBP6, partial [Ptero |
| XP_023074397 | 200 | 64 XP_015151391 | inactive peptidyl-prolyl cis-trans isomerase FKBP6 isoform X1 [Gallus gallus] |
| XP_018100492 | 202 | 64 POI24993     | hypothetical protein CIB84_011258 [Bambusicola thoracicus].                   |
| PNI92596     | 204 | 64 XP_015736491 | PREDICTED: inactive peptidyl-prolyl cis-trans isomerase FKBP6 [Coturnix japon |
| XP_008979919 | 232 | 64 XP_009998510 | PREDICTED: inactive peptidyl-prolyl cis-trans isomerase FKBP6 [Chaetura pelag |
| XP_010083598 | 237 | 64 XP_010194269 | PREDICTED: inactive peptidyl-prolyl cis-trans isomerase FKBP6, partial [Coliu |
| XP_009962683 | 239 | 64 KFP29338     | Peptidyl-prolyl cis-trans isomerase FKBP6, partial [Colius striatus].         |
| KFV99355     | 266 | 64 OXB56102     | hypothetical protein ASZ78_007956 [Callipepla squamata].                      |
| XP_009988051 | 295 | 64 KfV16869     | Peptidyl-prolyl cis-trans isomerase FKBP6, partial [Pterocles gutturalis].    |
| XP_012685286 | 309 | 64 KFQ41466     | Peptidyl-prolyl cis-trans isomerase FKBP6, partial [Nestor notabilis].        |
| KFQ41466     | 310 | 64 XP_024997748 | inactive peptidyl-prolyl cis-trans isomerase FKBP6 isoform X2 [Gallus gallus] |
| XP_010408101 | 318 | 64 KFO74526     | Peptidyl-prolyl cis-trans isomerase FKBP6, partial [Cuculus canorus].         |
| XP_019947232 | 328 | 64 KFP85199     | Peptidyl-prolyl cis-trans isomerase FKBP6, partial [Apaloderma vittatum].     |
| XP_009928379 | 216 | 63 XP_010124464 | PREDICTED: inactive peptidyl-prolyl cis-trans isomerase FKBP6, partial [Chlam |
| XP_009463122 | 234 | 63 XP_007894626 | PREDICTED: inactive peptidyl-prolyl cis-trans isomerase FKBP6 [Callorhinchus  |
| XP_007894626 | 235 | 63 XP_010022120 | PREDICTED: inactive peptidyl-prolyl cis-trans isomerase FKBP6, partial [Nesto |
| XP_010147897 | 241 | 63 KFQ39479     | Peptidyl-prolyl cis-trans isomerase FKBP6, partial [Mesitornis unicolor].     |
| KFP93140     | 247 | 63 KFP44723     | Peptidyl-prolyl cis-trans isomerase FKBP6, partial [Chlamydotis macqueenii].  |
| KFP44723     | 248 | 63 XP_017553040 | PREDICTED: inactive peptidyl-prolyl cis-trans isomerase FKBP6 isoform X1 [Pyg |
| XP_010891852 | 253 | 63 XP_009863922 | PREDICTED: inactive peptidyl-prolyl cis-trans isomerase FKBP6, partial [Apalo |
| KFV51798     | 264 | 63 KFW03341     | Peptidyl-prolyl cis-trans isomerase FKBP6, partial [Eurypyga helias].         |
| XP_016393789 | 272 | 63 XP_009093115 | PREDICTED: inactive peptidyl-prolyl cis-trans isomerase FKBP6 isoform X1 [Ser |
| XP_020341239 | 300 | 63 KQK73326     | Peptidyl-prolyl cis-trans isomerase FKBP6 [Amazona aestiva].                  |
| XP_008298046 | 351 | 63 KFP07119     | Peptidyl-prolyl cis-trans isomerase FKBP6, partial [Calypte anna].            |
| AWP19851     | 356 | 63 KFW82601     | Peptidyl-prolyl cis-trans isomerase FKBP6, partial [Manacus vitellinus].      |
| XP_014403985 | 370 | 63 XP_017553083 | PREDICTED: inactive peptidyl-prolyl cis-trans isomerase FKBP6 isoform X2 [Pyg |
| XP_008396658 | 387 | 63 XP_018774793 | PREDICTED: inactive peptidyl-prolyl cis-trans isomerase FKBP6 isoform X2 [Ser |
| XP_015736491 | 205 | 62 XP_010283169 | PREDICTED: inactive peptidyl-prolyl cis-trans isomerase FKBP6, partial [Phaet |
| XP_013812139 | 214 | 62 XP_009643249 | PREDICTED: inactive peptidyl-prolyl cis-trans isomerase FKBP6 [Egretta garzet |
| XP_009586283 | 221 | 62 KFQ72829     | Peptidyl-prolyl cis-trans isomerase FKBP6, partial [Phaethon lepturus].       |
| XP_012887159 | 225 | 62 XP_009940812 | PREDICTED: inactive peptidyl-prolyl cis-trans isomerase FKBP6 [Opisthocomus h |
| EOB04024     | 243 | 62 XP_023675251 | inactive peptidyl-prolyl cis-trans isomerase FKBP6 [Paramormyrops kingsleyae] |
| XP_020373313 | 298 | 62 XP_006640997 | PREDICTED: inactive peptidyl-prolyl cis-trans isomerase FKBP6 [Lepisosteus oc |
| XP_024997748 | 311 | 62 KFQ35533     | Peptidyl-prolyl cis-trans isomerase FKBP6, partial [Merops nubicus].          |
| XP_018412624 | 208 | 61 XP_010211497 | PREDICTED: inactive peptidyl-prolyl cis-trans isomerase FKBP6 [Tinamus guttat |
| XP_002187983 | 227 | 61 XP_009887190 | PREDICTED: inactive peptidyl-prolyl cis-trans isomerase FKBP6 [Charadrius voc |
| XP_017553040 | 249 | 61 XP_021396070 | inactive peptidyl-prolyl cis-trans isomerase FKBP6 [Lonchura striata domestic |
| XP_019903678 | 276 | 61 XP_014110391 | PREDICTED: inactive peptidyl-prolyl cis-trans isomerase FKBP6 [Pseudopodoces  |
| XP_019903676 | 279 | 61 XP_015502317 | PREDICTED: inactive peptidyl-prolyl cis-trans isomerase FKBP6 isoform X2 [Par |
| NP_001122145 | 282 | 61 OWK52486     | Inactive peptidyl-prolyl cis-trans isomerase FKBP6 [Lonchura striata domestic |
| XP_007245276 | 291 | 61 XP_023794776 | inactive peptidyl-prolyl cis-trans isomerase FKBP6 isoform X1 [Cyanistes caer |
| KFO13846     | 297 | 61 XP_020373313 | inactive peptidyl-prolyl cis-trans isomerase FKBP6 [Rhincodon typus].         |
| XP_023285908 | 321 | 61 XP_015502316 | PREDICTED: inactive peptidyl-prolyl cis-trans isomerase FKBP6 isoform X1 [Par |
| XP_018774793 | 388 | 61 XP_023794778 | inactive peptidyl-prolyl cis-trans isomerase FKBP6 isoform X3 [Cyanistes caer |
| KFQ96759     | 308 | 60 XP_012685286 | PREDICTED: inactive peptidyl-prolyl cis-trans isomerase FKBP6 [Clupea harengu |
| XP_020341240 | 281 | 59 NP_001122145 | peptidyl-prolyl cis-trans isomerase FKBP6 [Danio rerio].                      |
| XP_024287707 | 285 | 59 AAH54673     | Si:dkey-189h5.5 protein, partial [Danio rerio].                               |
| KFR16943     | 294 | 58 XP_009988051 | PREDICTED: inactive peptidyl-prolyl cis-trans isomerase FKBP6, partial [Taura |
| KFV84016     | 213 | 57 XP_013812139 | PREDICTED: inactive peptidyl-prolyl cis-trans isomerase FKBP6 [Apteryx austra |
| XP_010124464 | 217 | 57 XP_009321903 | PREDICTED: inactive peptidyl-prolyl cis-trans isomerase FKBP6 [Pygoscelis ade |
| KFW66808     | 255 | 57 XP_018591809 | PREDICTED: inactive peptidyl-prolyl cis-trans isomerase FKBP6, partial [Scler |
| XP_009093115 | 273 | 57 XP_023869471 | inactive peptidyl-prolyl cis-trans isomerase FKBP6-like isoform X1 [Salvelinu |
| XP_015502317 | 280 | 57 XP_020341240 | inactive peptidyl-prolyl cis-trans isomerase FKBP6 isoform X2 [Oncorhynchus k |

|              |     |                 |                                                                               |
|--------------|-----|-----------------|-------------------------------------------------------------------------------|
| OWK52486     | 283 | 57 XP_013992803 | PREDICTED: inactive peptidyl-prolyl cis-trans isomerase FKBP6-like isoform X2 |
| XP_013992803 | 284 | 57 XP_024287707 | inactive peptidyl-prolyl cis-trans isomerase FKBP6 isoform X1 [Oncorhynchus t |
| KFP60963     | 287 | 57 XP_018958370 | PREDICTED: inactive peptidyl-prolyl cis-trans isomerase FKBP6-like [Cyprinus  |
| XP_023794776 | 292 | 57 XP_021479427 | inactive peptidyl-prolyl cis-trans isomerase FKBP6-like isoform X2 [Oncorhync |
| XP_006640997 | 299 | 57 XP_020341239 | inactive peptidyl-prolyl cis-trans isomerase FKBP6 isoform X1 [Oncorhynchus k |
| XP_008500186 | 302 | 57 XP_013992801 | PREDICTED: inactive peptidyl-prolyl cis-trans isomerase FKBP6-like isoform X1 |
| XP_022534491 | 306 | 57 XP_021479426 | inactive peptidyl-prolyl cis-trans isomerase FKBP6-like isoform X1 [Oncorhync |
| XP_004542108 | 323 | 57 XP_023823730 | E3 ubiquitin-protein ligase rififylin isoform X2 [Salvelinus alpinus].        |
| XP_022046121 | 360 | 57 XP_019715044 | PREDICTED: inactive peptidyl-prolyl cis-trans isomerase FKBP6 [Hippocampus co |
| XP_017553083 | 371 | 57 XP_023869472 | inactive peptidyl-prolyl cis-trans isomerase FKBP6-like isoform X2 [Salvelinu |
| XP_023869472 | 372 | 57 XP_013992804 | PREDICTED: inactive peptidyl-prolyl cis-trans isomerase FKBP6-like isoform X3 |
| XP_020774925 | 374 | 57 XP_024287709 | inactive peptidyl-prolyl cis-trans isomerase FKBP6 isoform X3 [Oncorhynchus t |
| XP_024287709 | 375 | 57 XP_023869475 | inactive peptidyl-prolyl cis-trans isomerase FKBP6-like isoform X4 [Salvelinu |
| XP_023869475 | 376 | 57 XP_013992805 | PREDICTED: inactive peptidyl-prolyl cis-trans isomerase FKBP6-like isoform X4 |
| XP_013992805 | 377 | 57 XP_023869476 | inactive peptidyl-prolyl cis-trans isomerase FKBP6-like isoform X5 [Salvelinu |
| XP_023869476 | 378 | 57 XP_024287708 | inactive peptidyl-prolyl cis-trans isomerase FKBP6 isoform X2 [Oncorhynchus t |
| XP_024287708 | 379 | 57 XP_023869474 | inactive peptidyl-prolyl cis-trans isomerase FKBP6-like isoform X3 [Salvelinu |
| XP_023869474 | 380 | 57 XP_011490382 | inactive peptidyl-prolyl cis-trans isomerase FKBP6 isoform X3 [Oryzias latipe |
| XP_011490382 | 381 | 57 XP_020570387 | inactive peptidyl-prolyl cis-trans isomerase FKBP6 isoform X2 [Oryzias latipe |
| XP_014851597 | 384 | 57 XP_020570386 | inactive peptidyl-prolyl cis-trans isomerase FKBP6 isoform X1 [Oryzias latipe |
| KFQ87275     | 252 | 56 XP_010891852 | PREDICTED: inactive peptidyl-prolyl cis-trans isomerase FKBP6 isoform X2 [Eso |
| KFV69563     | 261 | 56 XP_023823731 | inactive peptidyl-prolyl cis-trans isomerase FKBP6 isoform X3 [Salvelinus alp |
| XP_023823731 | 262 | 56 XP_016346087 | PREDICTED: inactive peptidyl-prolyl cis-trans isomerase FKBP6-like [Sinocyclo |
| OXB56102     | 267 | 56 XP_018958387 | PREDICTED: LOW QUALITY PROTEIN: inactive peptidyl-prolyl cis-trans isomerase  |
| XP_018958387 | 268 | 56 XP_019903677 | PREDICTED: inactive peptidyl-prolyl cis-trans isomerase FKBP6 isoform X3 [Eso |
| KFU91562     | 270 | 56 XP_017314960 | PREDICTED: inactive peptidyl-prolyl cis-trans isomerase FKBP6 isoform X1 [Ict |
| XP_023869471 | 274 | 56 XP_019903679 | PREDICTED: inactive peptidyl-prolyl cis-trans isomerase FKBP6 isoform X5 [Eso |
| XP_019903679 | 275 | 56 XP_019903678 | PREDICTED: inactive peptidyl-prolyl cis-trans isomerase FKBP6 isoform X4 [Eso |
| XP_014110391 | 277 | 56 XP_017314964 | PREDICTED: inactive peptidyl-prolyl cis-trans isomerase FKBP6 isoform X2 [Ict |
| XP_017314964 | 278 | 56 XP_019903676 | PREDICTED: inactive peptidyl-prolyl cis-trans isomerase FKBP6 isoform X1 [Eso |
| KGL96380     | 289 | 56 XP_016148031 | PREDICTED: inactive peptidyl-prolyl cis-trans isomerase FKBP6-like [Sinocyclo |
| XP_016148031 | 290 | 56 XP_007245276 | inactive peptidyl-prolyl cis-trans isomerase FKBP6 isoform X2 [Astyanax mexic |
| KFV47875     | 305 | 56 XP_022534491 | inactive peptidyl-prolyl cis-trans isomerase FKBP6 isoform X1 [Astyanax mexic |
| KFQ35533     | 312 | 56 XP_020459257 | inactive peptidyl-prolyl cis-trans isomerase FKBP6 isoform X1 [Monopterus alb |
| XP_023823730 | 324 | 56 XP_020459258 | inactive peptidyl-prolyl cis-trans isomerase FKBP6 isoform X2 [Monopterus alb |
| XP_023794777 | 343 | 56 XP_015803473 | PREDICTED: inactive peptidyl-prolyl cis-trans isomerase FKBP6 [Nothobranchius |
| KPP68264     | 345 | 56 XP_020488061 | inactive peptidyl-prolyl cis-trans isomerase FKBP6 [Labrus bergylta].         |
| XP_010793476 | 355 | 56 AWP19851     | putative inactive peptidyl-prolyl cis-trans isomerase FKBP6 isoform 3 [Scopht |
| XP_009081377 | 364 | 56 AWP19849     | putative inactive peptidyl-prolyl cis-trans isomerase FKBP6 [Scophthalmus max |
| XP_012734526 | 367 | 56 AWP19850     | putative inactive peptidyl-prolyl cis-trans isomerase FKBP6 isoform 2 [Scopht |
| XP_017314960 | 271 | 55 XP_016393789 | PREDICTED: inactive peptidyl-prolyl cis-trans isomerase FKBP6-like [Sinocyclo |
| XP_020459257 | 313 | 55 XP_017264554 | inactive peptidyl-prolyl cis-trans isomerase FKBP6 isoform X2 [Kryptolebias m |
| XP_005725080 | 317 | 55 XP_010408101 | inactive peptidyl-prolyl cis-trans isomerase FKBP6 isoform X1 [Corvus cornix  |
| XP_020459258 | 325 | 55 XP_008634949 | PREDICTED: inactive peptidyl-prolyl cis-trans isomerase FKBP6 isoform X1 [Cor |
| KF085715     | 341 | 55 XP_015236136 | PREDICTED: inactive peptidyl-prolyl cis-trans isomerase FKBP6 [Cyprinodon var |
| XP_023794778 | 389 | 55 XP_024147377 | inactive peptidyl-prolyl cis-trans isomerase FKBP6 isoform X2 [Oryzias melast |
| XP_024147377 | 390 | 55 XP_024147375 | inactive peptidyl-prolyl cis-trans isomerase FKBP6 isoform X1 [Oryzias melast |
| XP_024147375 | 391 | 55 XP_024147378 | inactive peptidyl-prolyl cis-trans isomerase FKBP6 isoform X3 [Oryzias melast |
| XP_008396660 | 394 | 55 XP_017593619 | PREDICTED: inactive peptidyl-prolyl cis-trans isomerase FKBP6 isoform X2 [Cor |
| XP_009998510 | 233 | 54 XP_009463122 | PREDICTED: inactive peptidyl-prolyl cis-trans isomerase FKBP6 [Nipponia nippo |
| XP_013992801 | 303 | 54 XP_016350445 | PREDICTED: inactive peptidyl-prolyl cis-trans isomerase FKBP6-like [Sinocyclo |
| XP_005917667 | 315 | 54 XP_022621130 | inactive peptidyl-prolyl cis-trans isomerase FKBP6 [Seriola dumerili].        |
| XP_005449739 | 320 | 54 XP_023285908 | inactive peptidyl-prolyl cis-trans isomerase FKBP6 [Seriola lalandi dorsalis] |
| PWA27518     | 330 | 54 XP_003971664 | PREDICTED: inactive peptidyl-prolyl cis-trans isomerase FKBP6 [Takifugu rubri |
| KFV20040     | 337 | 54 XP_018551539 | PREDICTED: inactive peptidyl-prolyl cis-trans isomerase FKBP6 [Lates calcarif |
| XP_015803473 | 344 | 54 KPP68264     | hypothetical protein Z043_113075 [Scleropages formosus].                      |
| XP_023134576 | 366 | 54 XP_012734526 | inactive peptidyl-prolyl cis-trans isomerase FKBP6 [Fundulus heteroclitus].   |
| KQK73326     | 301 | 53 XP_008500186 | PREDICTED: inactive peptidyl-prolyl cis-trans isomerase FKBP6 [Calypte anna]. |
| XP_017264554 | 314 | 53 XP_005917667 | PREDICTED: inactive peptidyl-prolyl cis-trans isomerase FKBP6 isoform X2 [Hap |
| XP_022621130 | 316 | 53 XP_005725080 | PREDICTED: inactive peptidyl-prolyl cis-trans isomerase FKBP6 isoform X4 [Pun |
| XP_008634949 | 326 | 53 XP_013883182 | PREDICTED: inactive peptidyl-prolyl cis-trans isomerase FKBP6 [Austrofundulus |

|              |     |                 |                                                                               |
|--------------|-----|-----------------|-------------------------------------------------------------------------------|
| XP_003971664 | 331 | 53 XP_005917666 | PREDICTED: inactive peptidyl-prolyl cis-trans isomerase FKBP6 isoform X1 [Hap |
| XP_005917666 | 332 | 53 XP_013764145 | PREDICTED: inactive peptidyl-prolyl cis-trans isomerase FKBP6 isoform X3 [Pun |
| XP_013764145 | 333 | 53 XP_013764144 | PREDICTED: inactive peptidyl-prolyl cis-trans isomerase FKBP6 isoform X2 [Pun |
| XP_015236136 | 342 | 53 XP_023794777 | inactive peptidyl-prolyl cis-trans isomerase FKBP6 isoform X2 [Cyanistes caer |
| XP_015332442 | 347 | 53 XP_013764143 | PREDICTED: inactive peptidyl-prolyl cis-trans isomerase FKBP6 isoform X1 [Pun |
| XP_024147378 | 392 | 53 XP_014851599 | PREDICTED: inactive peptidyl-prolyl cis-trans isomerase FKBP6 isoform X3 [Poe |
| XP_008396661 | 396 | 53 XP_014851600 | PREDICTED: inactive peptidyl-prolyl cis-trans isomerase FKBP6 isoform X4 [Poe |
| PFX19011     | 402 | 53 XP_006793207 | PREDICTED: peptidyl-prolyl cis-trans isomerase FKBP6-like [Neolamprologus bri |
| XP_023675251 | 244 | 52 XP_009557002 | PREDICTED: inactive peptidyl-prolyl cis-trans isomerase FKBP6 [Cuculus canoru |
| KFO74526     | 319 | 52 XP_005449739 | PREDICTED: inactive peptidyl-prolyl cis-trans isomerase FKBP6 isoform X3 [Ore |
| XP_015502316 | 322 | 52 XP_004542108 | inactive peptidyl-prolyl cis-trans isomerase FKBP6 isoform X2 [Maylandia zebr |
| XP_013883182 | 327 | 52 XP_019947232 | PREDICTED: inactive peptidyl-prolyl cis-trans isomerase FKBP6 [Paralichthys o |
| CAG01803     | 335 | 52 XP_005449738 | PREDICTED: inactive peptidyl-prolyl cis-trans isomerase FKBP6 isoform X2 [Ore |
| XP_018551539 | 338 | 52 XP_004542106 | inactive peptidyl-prolyl cis-trans isomerase FKBP6 isoform X1 [Maylandia zebr |
| XP_013764143 | 348 | 52 XP_005449737 | PREDICTED: inactive peptidyl-prolyl cis-trans isomerase FKBP6 isoform X1 [Ore |
| KFO61461     | 350 | 52 XP_008298046 | PREDICTED: inactive peptidyl-prolyl cis-trans isomerase FKBP6 [Stegastes part |
| PKU35662     | 354 | 52 XP_010793476 | PREDICTED: inactive peptidyl-prolyl cis-trans isomerase FKBP6 [Notothenia cor |
| AWP19849     | 365 | 52 XP_023134576 | inactive peptidyl-prolyl cis-trans isomerase FKBP6 [Amphiprion ocellaris].    |
| XP_014851599 | 393 | 52 XP_008396660 | PREDICTED: inactive peptidyl-prolyl cis-trans isomerase FKBP6 isoform X4 [Poe |
| XP_017593619 | 395 | 52 XP_008396661 | PREDICTED: inactive peptidyl-prolyl cis-trans isomerase FKBP6 isoform X5 [Poe |
| KFP85199     | 329 | 51 PWA27518     | hypothetical protein CCH79_000000105, partial [Gambusia affinis].             |
| XP_013764144 | 334 | 51 CAG01803     | unnamed protein product, partial [Tetraodon nigroviridis].                    |
| KFP07119     | 352 | 51 XP_007561093 | PREDICTED: inactive peptidyl-prolyl cis-trans isomerase FKBP6 isoform X2 [Poe |
| XP_010739761 | 359 | 51 XP_022046121 | inactive peptidyl-prolyl cis-trans isomerase FKBP6 [Acanthochromis polyacanth |
| XP_013992804 | 373 | 51 XP_020774925 | inactive peptidyl-prolyl cis-trans isomerase FKBP6 [Boleophthalmus pectiniros |
| XP_008396657 | 383 | 51 XP_014851597 | PREDICTED: inactive peptidyl-prolyl cis-trans isomerase FKBP6 isoform X1 [Poe |
| XP_004542106 | 339 | 50 XP_005808385 | inactive peptidyl-prolyl cis-trans isomerase FKBP6 isoform X2 [Xiphophorus ma |
| KFW82601     | 357 | 50 XP_008396659 | PREDICTED: inactive peptidyl-prolyl cis-trans isomerase FKBP6 isoform X3 [Poe |
| XP_008396659 | 358 | 50 XP_010739761 | PREDICTED: inactive peptidyl-prolyl cis-trans isomerase FKBP6 [Larimichthys c |
| XP_018875413 | 362 | 50 XP_014327714 | inactive peptidyl-prolyl cis-trans isomerase FKBP6 isoform X1 [Xiphophorus ma |
| XP_020570387 | 382 | 50 XP_008396657 | PREDICTED: inactive peptidyl-prolyl cis-trans isomerase FKBP6 isoform X1 [Poe |
| KFP89108     | 386 | 50 XP_008396658 | PREDICTED: inactive peptidyl-prolyl cis-trans isomerase FKBP6 isoform X2 [Poe |
| XP_014851600 | 397 | 50 XP_019619874 | PREDICTED: inactive peptidyl-prolyl cis-trans isomerase FKBP6-like [Branchios |
| XP_020627099 | 401 | 50 PFX19011     | Inactive peptidyl-prolyl cis-trans isomerase FKBP6 [Stylophora pistillata].   |
| XP_011402831 | 404 | 50 XP_022801008 | inactive peptidyl-prolyl cis-trans isomerase FKBP6-like [Stylophora pistillat |
| EKC39444     | 426 | 50 XP_013405452 | inactive peptidyl-prolyl cis-trans isomerase FKBP6-like isoform X2 [Lingula a |
| XP_011148430 | 428 | 50 XP_013405451 | inactive peptidyl-prolyl cis-trans isomerase FKBP6-like isoform X1 [Lingula a |
| XP_023297605 | 533 | 50 XP_002594856 | hypothetical protein BRAFLDRAFT_86023 [Branchiostoma floridae].               |
| XP_023710706 | 400 | 49 XP_020627099 | inactive peptidyl-prolyl cis-trans isomerase FKBP6-like [Orbicella faveolata] |
| XP_022254671 | 407 | 49 ELT98785     | hypothetical protein CAPTEDRAFT_220934 [Capitella teleta].                    |
| XP_003700792 | 451 | 48 XP_023290805 | inactive peptidyl-prolyl cis-trans isomerase FKBP6 isoform X2 [Orussus abieti |
| XP_023290805 | 452 | 48 XP_012270499 | inactive peptidyl-prolyl cis-trans isomerase FKBP6 isoform X1 [Orussus abieti |
| XP_017001929 | 530 | 48 XP_009012598 | hypothetical protein HELRODRAFT_168497 [Helobdella robusta].                  |
| XP_014790271 | 415 | 47 XP_001636239 | predicted protein [Nematostella vectensis].                                   |
| KOX75315     | 440 | 47 XP_014234164 | inactive peptidyl-prolyl cis-trans isomerase FKBP6 [Trichogramma pretiosum].  |
| XP_017148191 | 537 | 47 XP_002412109 | FKBP-type peptidyl-prolyl cis-trans isomerase, putative, partial [Ixodes scap |
| ELT98785     | 408 | 46 XP_021353947 | inactive peptidyl-prolyl cis-trans isomerase FKBP6-like [Mizuhopecten yessoen |
| XP_022108899 | 411 | 46 OWF50262     | Peptidyl-prolyl cis-trans isomerase FKBP6 [Mizuhopecten yessoensis].          |
| XP_011415211 | 424 | 46 XP_020909274 | inactive peptidyl-prolyl cis-trans isomerase FKBP6-like [Exaiptasia pallida]. |
| XP_014247946 | 470 | 46 XP_014270488 | inactive peptidyl-prolyl cis-trans isomerase FKBP6 [Halyomorpha halys].       |
| PFH33404     | 484 | 46 XP_019876143 | PREDICTED: inactive peptidyl-prolyl cis-trans isomerase shutdown [Aethina tum |
| XP_006793207 | 403 | 45 XP_011402831 | PREDICTED: inactive peptidyl-prolyl cis-trans isomerase FKBP6-like [Amphimed  |
| XP_002128893 | 418 | 45 XP_009051935 | hypothetical protein LOTGIDRAFT_114969 [Lottia gigantea].                     |
| XP_009051935 | 419 | 45 XP_012221039 | PREDICTED: inactive peptidyl-prolyl cis-trans isomerase FKBP6 [Linepithema hu |
| XP_013405451 | 429 | 45 PVD31214     | hypothetical protein CQ070_06626 [Pomacea canaliculata].                      |
| PIK39047     | 431 | 45 XP_022336187 | inactive peptidyl-prolyl cis-trans isomerase FKBP6-like [Crassostrea virginic |
| XP_022336187 | 432 | 45 XP_022337811 | inactive peptidyl-prolyl cis-trans isomerase FKBP6-like [Crassostrea virginic |
| XP_014475449 | 436 | 45 XP_014279621 | inactive peptidyl-prolyl cis-trans isomerase FKBP6-like [Halyomorpha halys].  |
| XP_022193504 | 438 | 45 XP_014204130 | inactive peptidyl-prolyl cis-trans isomerase FKBP6 [Copidosoma floridanum].   |
| XP_012062619 | 456 | 45 XP_012527508 | PREDICTED: inactive peptidyl-prolyl cis-trans isomerase FKBP6-like [Monomoriu |
| XP_015185328 | 505 | 45 XP_024867102 | inactive peptidyl-prolyl cis-trans isomerase FKBP6 [Temnothorax curvispinosus |

|              |     |                 |                                                                                |
|--------------|-----|-----------------|--------------------------------------------------------------------------------|
| XP_002167164 | 413 | 44 KOF62423     | hypothetical protein OCBIM_22023537mg, partial [Octopus bimaculoides].         |
| XP_015515854 | 423 | 44 XP_011415211 | PREDICTED: inactive peptidyl-prolyl cis-trans isomerase FKBP6 [Crassostrea gi  |
| XP_020909274 | 425 | 44 EKC39444     | hypothetical protein CGI_10020047 [Crassostrea gigas].                         |
| XP_013405452 | 427 | 44 XP_011148430 | inactive peptidyl-prolyl cis-trans isomerase FKBP6 [Harpegnathos saltator].    |
| XP_014787871 | 434 | 44 EFN78601     | FK506-binding protein 6 [Harpegnathos saltator].                               |
| AKN09689     | 455 | 44 XP_012062619 | PREDICTED: inactive peptidyl-prolyl cis-trans isomerase FKBP6 [Atta cephalote  |
| XP_005089179 | 458 | 44 XP_003424555 | PREDICTED: inactive peptidyl-prolyl cis-trans isomerase FKBP6 [Nasonia vitrip  |
| XP_014247948 | 466 | 44 XP_011064230 | PREDICTED: inactive peptidyl-prolyl cis-trans isomerase FKBP6-like [Acromyrme  |
| XP_018356457 | 476 | 44 XP_011173578 | PREDICTED: inactive peptidyl-prolyl cis-trans isomerase FKBP6 [Solenopsis inv  |
| XP_018333359 | 493 | 44 EFZ09302     | hypothetical protein SINV_13600, partial [Solenopsis invicta].                 |
| XP_008560701 | 509 | 44 XP_011695993 | PREDICTED: inactive peptidyl-prolyl cis-trans isomerase FKBP6-like [Wasmannia  |
| XP_016801711 | 399 | 43 XP_023710706 | inactive peptidyl-prolyl cis-trans isomerase FKBP6 [Cryptotermes secundus].    |
| XP_022801008 | 405 | 43 XP_013786360 | inactive peptidyl-prolyl cis-trans isomerase FKBP6-like isoform X2 [Limulus p  |
| XP_013786360 | 406 | 43 XP_022254671 | inactive peptidyl-prolyl cis-trans isomerase FKBP6-like isoform X1 [Limulus p  |
| XP_009857551 | 422 | 43 XP_015515854 | PREDICTED: inactive peptidyl-prolyl cis-trans isomerase FKBP6 [Neodiprion lec  |
| XP_015586170 | 444 | 43 XP_003486736 | inactive peptidyl-prolyl cis-trans isomerase FKBP6 [Bombus impatiens].         |
| XP_019882220 | 446 | 43 XP_003402471 | inactive peptidyl-prolyl cis-trans isomerase FKBP6 [Bombus terrestris].        |
| XP_012270499 | 453 | 43 XP_018309319 | PREDICTED: inactive peptidyl-prolyl cis-trans isomerase FKBP6 isoform X1 [Tra  |
| XP_003424555 | 459 | 43 XP_018055399 | PREDICTED: inactive peptidyl-prolyl cis-trans isomerase FKBP6-like [Atta colo  |
| XP_017877748 | 461 | 43 XP_018399012 | PREDICTED: inactive peptidyl-prolyl cis-trans isomerase FKBP6 [Cyphomyrmex co  |
| XP_018399012 | 462 | 43 KYM99352     | Peptidyl-prolyl cis-trans isomerase FKBP6 [Cyphomyrmex costatus].              |
| KYM99352     | 463 | 43 XP_018309322 | PREDICTED: inactive peptidyl-prolyl cis-trans isomerase FKBP6 isoform X2 [Tra  |
| XP_011647883 | 465 | 43 XP_014247948 | inactive peptidyl-prolyl cis-trans isomerase FKBP6-like isoform X2 [Cimex lec  |
| XP_002430548 | 469 | 43 XP_014247946 | inactive peptidyl-prolyl cis-trans isomerase FKBP6-like isoform X1 [Cimex lec  |
| XP_011330216 | 473 | 43 EGI60945     | FK506-binding protein 6, partial [Acromyrmex echinatio].                       |
| EGI60945     | 474 | 43 XP_011061927 | PREDICTED: inactive peptidyl-prolyl cis-trans isomerase FKBP6-like [Acromyrme  |
| XP_016917008 | 479 | 43 XP_018374414 | PREDICTED: inactive peptidyl-prolyl cis-trans isomerase FKBP6 [Trachymyrmex c  |
| AET50588     | 499 | 43 XP_020893545 | inactive peptidyl-prolyl cis-trans isomerase FKBP6-like [Exaiphtasia pallida]. |
| XP_023237057 | 417 | 42 XP_002128893 | PREDICTED: inactive peptidyl-prolyl cis-trans isomerase FKBP6 isoform X1 [Cio  |
| XP_012264923 | 421 | 42 XP_009857551 | PREDICTED: inactive peptidyl-prolyl cis-trans isomerase FKBP6 isoform X2 [Cio  |
| PVD31214     | 430 | 42 PIK39047     | putative inactive peptidyl-prolyl cis-trans isomerase FKBP6 [Apostichopus jap  |
| XP_014234164 | 441 | 42 KII63942     | Inactive peptidyl-prolyl cis-trans isomerase FKBP6 [Thelohanellus kitauei].    |
| XP_012527508 | 457 | 42 XP_005089179 | PREDICTED: inactive peptidyl-prolyl cis-trans isomerase FKBP6-like [Aplysia c  |
| XP_018309322 | 464 | 42 XP_011647883 | inactive peptidyl-prolyl cis-trans isomerase FKBP6 [Pogonomyrmex barbatus].    |
| ORY30517     | 472 | 42 XP_011330216 | PREDICTED: inactive peptidyl-prolyl cis-trans isomerase FKBP6 [Ooceraea biro   |
| XP_017070534 | 515 | 42 XP_001942690 | PREDICTED: inactive peptidyl-prolyl cis-trans isomerase FKBP6 [Acyrtosiphon    |
| XP_021353947 | 409 | 41 XP_022108900 | inactive peptidyl-prolyl cis-trans isomerase FKBP6-like isoform X2 [Acanthast  |
| XP_022108900 | 410 | 41 XP_022108899 | inactive peptidyl-prolyl cis-trans isomerase FKBP6-like isoform X1 [Acanthast  |
| OWF50262     | 412 | 41 XP_002167164 | PREDICTED: inactive peptidyl-prolyl cis-trans isomerase FKBP6-like [Hydra vul  |
| XP_001636239 | 416 | 41 XP_023237057 | inactive peptidyl-prolyl cis-trans isomerase FKBP6-like [Centruroides sculptu  |
| XP_012221039 | 420 | 41 XP_012264923 | inactive peptidyl-prolyl cis-trans isomerase FKBP6 [Athalia rosae].            |
| XP_014270488 | 471 | 41 ORY30517     | hypothetical protein BCR33DRAFT_724326 [Rhizoclosmatium globosum].             |
| XP_011061927 | 475 | 41 XP_018356457 | PREDICTED: inactive peptidyl-prolyl cis-trans isomerase FKBP6-like isoform X2  |
| XP_011173578 | 477 | 41 XP_018356456 | PREDICTED: inactive peptidyl-prolyl cis-trans isomerase FKBP6-like isoform X1  |
| XP_019876143 | 485 | 41 XP_014299498 | PREDICTED: inactive peptidyl-prolyl cis-trans isomerase FKBP6-like [Microplit  |
| XP_005186588 | 489 | 41 XP_011879049 | PREDICTED: inactive peptidyl-prolyl cis-trans isomerase FKBP6 isoform X2 [Vol  |
| XP_013109471 | 491 | 41 XP_011879048 | PREDICTED: inactive peptidyl-prolyl cis-trans isomerase FKBP6 isoform X1 [Vol  |
| XP_011206843 | 508 | 41 XP_008560701 | PREDICTED: inactive peptidyl-prolyl cis-trans isomerase FKBP6 isoform X2 [Mic  |
| XP_011695993 | 510 | 41 PIK55877     | putative peptidyl-prolyl cis-trans isomerase FKBP6-like [Apostichopus japonic  |
| XP_017120033 | 513 | 41 XP_022165811 | inactive peptidyl-prolyl cis-trans isomerase FKBP6-like [Myzus persicae].      |
| XP_014091483 | 518 | 41 XP_015376375 | PREDICTED: inactive peptidyl-prolyl cis-trans isomerase FKBP6-like [Diuraphis  |
| XP_015431627 | 521 | 41 ORX48915     | FKBP-like protein [Piriomyces finnis].                                         |
| EFN78601     | 435 | 40 XP_014475449 | PREDICTED: inactive peptidyl-prolyl cis-trans isomerase FKBP6 [Dinoponera qua  |
| KII63942     | 442 | 40 XP_024936423 | inactive peptidyl-prolyl cis-trans isomerase FKBP6 isoform X2 [Cephus cinctus  |
| XP_024936423 | 443 | 40 XP_015586170 | inactive peptidyl-prolyl cis-trans isomerase FKBP6 isoform X1 [Cephus cinctus  |
| XP_003486736 | 445 | 40 XP_019882220 | PREDICTED: inactive peptidyl-prolyl cis-trans isomerase FKBP6 isoform X1 [Cam  |
| XP_003402471 | 447 | 40 XP_012134979 | PREDICTED: inactive peptidyl-prolyl cis-trans isomerase FKBP6 isoform X2 [Meg  |
| XP_017756606 | 449 | 40 XP_012134978 | PREDICTED: inactive peptidyl-prolyl cis-trans isomerase FKBP6 isoform X1 [Meg  |
| XP_012134978 | 450 | 40 XP_003700792 | PREDICTED: inactive peptidyl-prolyl cis-trans isomerase FKBP6 isoform X3 [Meg  |
| XP_018055399 | 460 | 40 XP_017877748 | PREDICTED: inactive peptidyl-prolyl cis-trans isomerase FKBP6 [Ceratina calca  |
| XP_016917007 | 481 | 40 XP_019882221 | PREDICTED: inactive peptidyl-prolyl cis-trans isomerase shutdown isoform X2 [  |



|              |     |    |              |                                                                               |
|--------------|-----|----|--------------|-------------------------------------------------------------------------------|
| KOC63519     | 487 | 40 | XP_015126020 | PREDICTED: inactive peptidyl-prolyl cis-trans isomerase FKBP6 [Diachasma allo |
| XP_011879048 | 492 | 40 | XP_018333359 | PREDICTED: inactive peptidyl-prolyl cis-trans isomerase FKBP6 [Agrilus planip |
| XP_018790058 | 498 | 40 | AET50588     | hypothetical protein [Eimeria tenella].                                       |
| XP_024867102 | 506 | 40 | XP_011130643 | putative peptidyl-prolyl cis-trans isomerase [Gregarina niphandrodes].        |
| XP_001942690 | 516 | 40 | XP_003883131 | Peptidylprolyl isomerase D-related [Neospora caninum Liverpool                |
| XP_016974015 | 526 | 40 | KFG33606     | peptidyl-prolyl cis-trans isomerase, partial [Toxoplasma gondii FOU].         |
| XP_017045419 | 528 | 40 | PUA87907     | peptidyl-prolyl cis-trans isomerase, partial [Toxoplasma gondii TgCATBr9].    |
| XP_009012598 | 531 | 40 | XP_008888049 | peptidyl-prolyl cis-trans isomerase [Hammondia hammondi].                     |
| XP_011298074 | 540 | 40 | ESS30489     | peptidyl-prolyl cis-trans isomerase [Toxoplasma gondii VEG].                  |
| ESS30489     | 541 | 40 | EPR59296     | peptidyl-prolyl cis-trans isomerase [Toxoplasma gondii GT1].                  |
| EPR59296     | 542 | 40 | OAJ38225     | hypothetical protein BDEG_22175 [Batrachochytrium dendrobatidis JEL423].      |
| OAJ38225     | 543 | 40 | XP_018637740 | peptidyl-prolyl cis-trans isomerase [Toxoplasma gondii ME49].                 |
| XP_018637740 | 544 | 40 | KYK63140     | peptidyl-prolyl cis-trans isomerase [Toxoplasma gondii TgCatPRC2].            |
| KYK63140     | 545 | 40 | CEL73032     | TPA: peptidyl-prolyl isomerase, putative [Toxoplasma gondii VEG].             |
| XP_014279621 | 437 | 39 | XP_022193504 | inactive peptidyl-prolyl cis-trans isomerase FKBP6 [Nilaparvata lugens].      |
| XP_014204130 | 439 | 39 | KOX75315     | Peptidyl-prolyl cis-trans isomerase FKBP6 [Melipona quadrifasciata].          |
| XP_011064230 | 467 | 39 | XP_014613253 | PREDICTED: inactive peptidyl-prolyl cis-trans isomerase FKBP6 [Polistes canad |
| XP_006611831 | 496 | 39 | XP_014245088 | inactive peptidyl-prolyl cis-trans isomerase FKBP6-like [Cimex lectularius].  |
| ORX48915     | 522 | 39 | XP_001958659 | uncharacterized protein Dana_GF12456 [Drosophila ananassae].                  |
| XP_001958659 | 523 | 39 | XP_013077159 | PREDICTED: inactive peptidyl-prolyl cis-trans isomerase FKBP6-like isoform X2 |
| XP_013077159 | 524 | 39 | XP_013077158 | PREDICTED: inactive peptidyl-prolyl cis-trans isomerase FKBP6-like isoform X1 |
| XP_022337811 | 433 | 38 | XP_014787871 | PREDICTED: inactive peptidyl-prolyl cis-trans isomerase FKBP6-like, partial [ |
| XP_012134979 | 448 | 38 | XP_017756606 | PREDICTED: inactive peptidyl-prolyl cis-trans isomerase FKBP6 [Eufriesea mexi |
| XP_014613253 | 468 | 38 | XP_002430548 | FK506-binding protein, putative [Pediculus humanus corporis].                 |
| XP_011191641 | 483 | 38 | PFH33404     | peptidyl-prolyl cis-trans isomerase [Besnoitia besnoiti].                     |
| XP_014299498 | 486 | 38 | KOC63519     | Peptidyl-prolyl cis-trans isomerase FKBP6 [Habropoda laboriosa].              |
| XP_002092689 | 501 | 38 | XP_020293583 | inactive peptidyl-prolyl cis-trans isomerase FKBP6-like [Pseudomyrmex gracili |
| XP_003689972 | 504 | 38 | XP_015185328 | PREDICTED: inactive peptidyl-prolyl cis-trans isomerase FKBP6 [Polistes domin |
| XP_022165811 | 514 | 38 | XP_017070534 | PREDICTED: inactive peptidyl-prolyl cis-trans isomerase shutdown [Drosophila  |
| XP_015376375 | 519 | 38 | KOF66856     | hypothetical protein OCBIM_22011108mg, partial [Octopus bimaculoides].        |
| XP_004517316 | 536 | 38 | XP_017148191 | PREDICTED: inactive peptidyl-prolyl cis-trans isomerase shutdown-like [Drosop |
| XP_018356456 | 478 | 37 | XP_016917008 | PREDICTED: inactive peptidyl-prolyl cis-trans isomerase FKBP6 isoform X2 [Api |
| XP_018374414 | 480 | 37 | XP_016917007 | PREDICTED: inactive peptidyl-prolyl cis-trans isomerase FKBP6 isoform X1 [Api |
| XP_016927793 | 495 | 37 | XP_006611831 | PREDICTED: peptidyl-prolyl cis-trans isomerase FKBP6-like [Apis dorsata].     |
| PIK55877     | 511 | 37 | XP_022218357 | inactive peptidyl-prolyl cis-trans isomerase shutdown [Drosophila obscura].   |
| KOF62423     | 414 | 36 | XP_014790271 | PREDICTED: inactive peptidyl-prolyl cis-trans isomerase FKBP6-like [Octopus b |
| XP_016952968 | 503 | 36 | XP_003689972 | PREDICTED: inactive peptidyl-prolyl cis-trans isomerase FKBP6 isoform X1 [Api |
| XP_002594856 | 534 | 36 | XP_018896035 | PREDICTED: inactive peptidyl-prolyl cis-trans isomerase FKBP6-like [Bemisia t |
| XP_014507068 | 539 | 36 | XP_011298074 | PREDICTED: inactive peptidyl-prolyl cis-trans isomerase shutdown [Fopius aris |
| NP_611837    | 549 | 36 | XP_012342118 | PREDICTED: inactive peptidyl-prolyl cis-trans isomerase FKBP6 isoform X2 [Api |
| XP_002040150 | 552 | 36 | XP_001357527 | uncharacterized protein Dpse_GA18393 [Drosophila pseudoobscura pseudoobscura] |
| XP_001357527 | 553 | 36 | XP_002015409 | GL11067 [Drosophila persimilis].                                              |
| XP_017469679 | 555 | 36 | XP_020810045 | inactive peptidyl-prolyl cis-trans isomerase shutdown [Drosophila serrata].   |
| KOF66856     | 520 | 35 | XP_015431627 | PREDICTED: inactive peptidyl-prolyl cis-trans isomerase shutdown [Dufourea no |
| XP_020293583 | 502 | 34 | XP_016952968 | PREDICTED: inactive peptidyl-prolyl cis-trans isomerase shutdown [Drosophila  |
| XP_013077158 | 525 | 34 | XP_016974015 | PREDICTED: inactive peptidyl-prolyl cis-trans isomerase shutdown [Drosophila  |
| EFZ09302     | 494 | 33 | XP_016927793 | PREDICTED: inactive peptidyl-prolyl cis-trans isomerase shutdown [Drosophila  |
| XP_020893545 | 500 | 33 | XP_002092689 | uncharacterized protein Dyak_GE11527 [Drosophila yakuba].                     |
| XP_022218357 | 512 | 33 | XP_017120033 | PREDICTED: inactive peptidyl-prolyl cis-trans isomerase shutdown [Drosophila  |
| KFG33606     | 527 | 33 | XP_017045419 | PREDICTED: inactive peptidyl-prolyl cis-trans isomerase shutdown [Drosophila  |
| XP_002412109 | 538 | 33 | XP_014507068 | 70 kDa peptidyl-prolyl isomerase [Vigna radiata var. radiata].                |
| AAAX51680    | 547 | 33 | AFJ24780     | peptidyl prolyl cis trans isomerase FKBP-2, partial [Schmidtea mediterranea]. |
| AFJ24780     | 548 | 33 | NP_611837    | shutdown [Drosophila melanogaster].                                           |
| XP_012342118 | 550 | 33 | XP_002082854 | uncharacterized protein Dsimw501_GD25009, isoform A [Drosophila simulans].    |
| XP_002082854 | 551 | 33 | XP_002040150 | GM15507 [Drosophila sechellia].                                               |
| XP_019882221 | 482 | 31 | XP_011191641 | PREDICTED: inactive peptidyl-prolyl cis-trans isomerase shutdown [Zeugodacus  |
| PUA87907     | 529 | 31 | XP_017001929 | PREDICTED: inactive peptidyl-prolyl cis-trans isomerase shutdown [Drosophila  |
| XP_015126020 | 488 | 30 | XP_005186588 | PREDICTED: inactive peptidyl-prolyl cis-trans isomerase shutdown [Musca domes |
| XP_011879049 | 490 | 30 | XP_013109471 | PREDICTED: inactive peptidyl-prolyl cis-trans isomerase shutdown [Stomoxys ca |
| XP_014245088 | 497 | 30 | XP_018790058 | PREDICTED: inactive peptidyl-prolyl cis-trans isomerase shutdown-like [Bactro |
| XP_011130643 | 507 | 30 | XP_011206843 | PREDICTED: inactive peptidyl-prolyl cis-trans isomerase shutdown [Bactrocera  |

|              |     |                 |                                                                                   |
|--------------|-----|-----------------|-----------------------------------------------------------------------------------|
| XP_003883131 | 517 | 30 XP_014091483 | PREDICTED: inactive peptidyl-prolyl cis-trans isomerase shutdown [Bactrocera      |
| XP_018896035 | 535 | 30 XP_004517316 | inactive peptidyl-prolyl cis-trans isomerase shutdown [Ceratitis capitata].       |
| XP_002015409 | 554 | 29 XP_017469679 | PREDICTED: inactive peptidyl-prolyl cis-trans isomerase shutdown-like [Rhagoletis |
| XP_008888049 | 532 | 28 XP_023297605 | inactive peptidyl-prolyl cis-trans isomerase shutdown-like [Lucilia cuprina].     |
