# Supplementary material for: Compression of Large Sets of Sequence Data Reveals Fine Diversification of Functional Profiles in Multigene Families of Proteins: A Study for Peptidyl-Prolyl cis/trans Isomerases (PPIase)
Source: MDPI journal article supplement (doi:10.3390/biom9020059), 2019-02-11
Supplement: s1 [file s1]

CLUSTAL 2.0.9 multiple sequence alignment of FKBP36s

```

NP_003593      GVLKDVIREGAG--DLVAPDA-SVL-VKYSGYLEHMDRPFDSN-YFRKT--PRLMKLGE-
XP_003815624   GVLKDVIREGAG--DLVAPDA-SVL-VKYSGYLEHMDRPFDSN-YFRKT--PRLMKLGE-
XP_003777068   GVLKDVIREGGG--DLVAPDA-SVL-VKYSGYLEHMDRPFDSN-YFRKT--PRLMKLGE-
XP_003276647   GVLKDVIREGAG--DLVAPDA-SVL-VKYSGYLEHMDRPFDSN-YFRKT--PRLMKLGE-
XP_003895916   GVLKDVIREGAG--DLVAPDA-SVL-VKYSGYLEHMDRPFDSN-YFRKT--PRLMKLGE-
EHH17242       GVLKDVIREGAG--DLVAPDA-SVL-VKYSGYLEHMDRPFDSN-YFRKT--PRLMKLGE-
XP_001110932   GVLKDVIREGAG--DLVAPDA-SVL-VKYSGYLEHMDRPFDSN-YFRKT--PRLMKLGE-
XP_011785750   GVLKDVIREGAG--DLVAPDA-SVL-VKYSGYLEHMDRPFDSN-YFRKT--PRLMKLGE-
NP_001128683   GVLKDVIREGAG--DLVAPDA-SVL-VKYSGYLEHMDRPFDSN-YFRKT--PRLMKLGE-
XP_017713171   GVLKDVIREGAG--DLVVPDA-SVL-VKYSGYLEHMDRPFDSN-YFRKT--PRLMKLGE-
XP_010385752   GVLKDVIREGAG--DLVVPDA-SVL-VKYSGYLEHMDRPFDSN-YFRKT--PRLMKLGE-
XP_002817917   GVLKDVIREGGG--DLVAPDA-SVL-VKYSGYLEHMDRPFDSN-YFRKT--PRLMKLGE-
XP_004045599   GVLKDVIREGAG--DLVAPDA-SVL-VKYSGYLEHMDRPFDSN-YFRKT--PRLMKLGE-
XP_008979905   GVLKDVIREGAG--DLVAPDA-TVL-VKYSGYLEHMDRPFDSN-CHRRT--PKLMKLGE-
XP_016868230   GVLKDVIREGAG--DLVAPDA-SVL-VKYSGYLEHMDRPFDSN-YFRKT--PRLMKLGE-
XP_003794239   GVLKDVIREGAG--ELVTPDA-SVL-VKYSGYLEHMDRPFDSN-CFRKT--PRLMKLGE-
XP_012597698   GVLKDVIREGAG--DLVTPDA-SVL-VKYSGYLEHMDKPFDSN-CFRKT--PRLMKLGE-
XP_011931834   GVLKDVIREGAG--DLVAPDA-SVL-VKYSGYLEHMDRPFDSN-YFRKT--PRLMKLGE-
XP_003895917   GVLKDVIREGAG--DLVAPDA-SVL-VKYSGYLEHMDRPFDSN-YFRKT--PRLMKLGE-
XP_008016547   GVLKDVIREGAG--DLVAPDA-SVL-VKYSGYLEHMDRPFDSN-YFRKT--PRLMKLGE-
XP_003934167   GVLKDVIREGAG--DLVAPDA-TVL-VKYSGYLEHMDRPFDSN-CHRRT--PKLMKLGE-
XP_012495716   GVLKDVIREGAG--DLVTPDA-SVI-VKYSGYLEHMDKPFDSN-CFRKT--PRLMKLGE-
XP_012304459   GVLKDVIREGAG--DLVAPDA-TVL-VKYSGYLEHMDRPFDSN-CHRRT--PKLMKLGE-
XP_022357643   GVLKDVIREGAG--ELVTPDA-SVL-VKYSGYLEHMDKPFDSN-CFRRT--PRLMKLGE-
XP_010385754   GVLKDVIREGAG--DLVVPDA-SVL-VKYSGYLEHMDRPFDSN-YFRKT--PRLMKLGE-
XP_017895560   GVLKDVIREGAG--ELVTPDA-SVL-VKYSGYLEHMDKPFDSN-CFRKT--PRLMKLGE-
XP_005892900   GVLKDVIREGAG--ELVTPDA-SVL-VKYSGYLEHMDKPFDSN-CFRKT--PRLMKLGE-
XP_010852603   GVLKDVIREGAG--ELVTPDA-SVL-VKYSGYLEHMDKPFDSN-CFRKT--PRLMKLGE-
XP_546928      GVLKDVIREGAG--ELVTPDA-SVL-VKYSGYLEHMDKPFDSN-CFRKT--PRLMKLGE-
XP_005225237   GVLKDVIREGAG--ELVTPDA-SVL-VKYSGYLEHMDKPFDSN-CFRKT--PRLMKLGE-
XP_021556246   GVLKDVIREGAG--ELVTPDA-SVL-VKYSGYLEHMDKPFDSN-CFRKT--PRLMKLGE-
XP_011978492   GVLKDVIREGAG--ELVTPDA-SVL-VKYSGYLEHMDKPFDSN-CFRKT--PRLMKLGE-
NP_001296390   GVLKDVIREGAG--ELVTPDA-SVL-VKYSGYLEHMDKPFDSN-CFRKT--PRLMKLGE-
XP_011959859   GVLKDVIREGAG--ELVTPDA-SVL-VKYSGYLEHMDKPFDSN-CFRKT--PRLMKLGE-
XP_006942097   GVLKDVIREGAG--ELVTPDA-SVL-VKYSGYLEHMDKPFDSN-CFRKT--PRLMKLGE-
XP_007100028   GVLKDVIREGSG--ELVTPDA-SVL-VKYSGYLEHMDKAFDSN-CFRKT--PRLMKLGE-
XP_005972253   GVLKDVIREGAG--ELVTPDA-SVL-VKYSGYLEHMDKPFDSN-CFRKT--PRLMKLGE-
XP_019277206   GVLKDVIREGAG--ELVTPDA-SVL-VKYSGYLEHMDKPFDSN-CFRKT--PRLMKLGE-
XP_014705926   GVLKDVIREGAG--ELVTPDA-SVL-VKYSGYLEHMDKPFDSN-CFRKT--PRLMKLGE-
XP_008540619   GVLKDVIREGAG--ELVTPDA-SVL-VKYSGYLEHMDKPFDSN-CFRKT--PRLMKLGE-
XP_020752493   GVLKDVIREGAG--ELVTPDA-SVL-VKYSGYLEHMDKPFDSN-CFRKT--PRLMKLGE-
XP_014988800   GVLKDVIREGAG--DLVAPDA-SVL-VKYSGYLEHMDRPFDSN-YFRKT--PRLMKLGE-
XP_011785755   GVLKDVIREGAG--DLVAPDA-SVL-VKYSGYLEHMDRPFDSN-YFRKT--PRLMKLGE-
XP_022444356   GVLKDVIREGSG--ELVTPDA-SVL-VKYSGYLEHMDKPFDSN-CFRKT--PRLMKLGE-
XP_008979887   GVLKDVIREGAG--DLVAPDA-TVL-VKYSGYLEHMDRPFDSN-CHRRT--PKLMKLGE-
XP_004399150   GVLKDVIREGAG--ELVTPDA-SVL-VKYSGYLEHMDKPFDSN-WFRKT--PRLMKLGE-
XP_004268847   GVLKDVIREGSG--ELVTPDA-SVL-VKYSGYLEHMDKPFDSN-CFRKT--PRLMKLGE-
XP_019659608   GVLKDVIREGAG--ELVTPDA-AVL-VKYSGYLEHMDKPFASN-CFRKT--PRLMKLGE-
XP_024602986   GVLKDVIQEGSG--ELVTPDA-SVL-VKYSGYLEHMDKPFDSN-CFRKT--PRLMKLGE-
XP_007186614   GVLKDVIREGSG--ELVTPDA-SVL-VKYSGYLEHMDKPFDSN-CFRKT--PRLMKLGE-
XP_014652016   GVLKDVIREGAG--ELVTQDA-SVL-VKYSGYLEHMDKPFDSN-CFRKT--PRLMKLGE-
XP_012597701   GVLKDVIREGAG--DLVTPDA-SVL-VKYSGYLEHMDKPFDSN-CFRKT--PRLMKLGE-
XP_004761711   GVLKDVIREGAG--ELVTPDA-SVL-VKYSGYLEHMDKPFDSN-CFRKT--PRLMKLGE-
XP_004317177   GVLKDVIREGSG--ELVTPDA-SVL-VKYSGYLEHMDKPFDSN-CFRKT--PRLMKLGE-
XP_005892901   GVLKDVIREGAG--ELVTPDA-SVL-VKYSGYLEHMDKPFDSN-CFRKT--PRLMKLGE-

```

|              |                                                              |
|--------------|--------------------------------------------------------------|
| XP_017895559 | GVLKDVIREGAG--ELVTPDA-SVL-VKYSGYLEHMDKPFDSN-CFRKT--PRLMKLGE- |
| XP_005662030 | GVLKDVIREGTG--ELVTPDA-SVL-VKYSGYLEHMDKPFDSN-CFRKT--PRLMKLGE- |
| XP_010852604 | GVLKDVIREGAG--ELVTPDA-SVL-VKYSGYLEHMDKPFDSN-CFRKT--PRLMKLGE- |
| XP_010852602 | GVLKDVIREGAG--ELVTPDA-SVL-VKYSGYLEHMDKPFDSN-CFRKT--PRLMKLGE- |
| EPY83956     | GVLKDVIREGAG--ELVTPDA-SVL-VKYSGYLEHMDKPFDSN-CFRKT--LRLMKLGE- |
| NP_001095679 | GVLKDVIREGAG--ELVTPDA-SVL-VKYSGYLEHMDKPFDSN-CFRKT--PRLMKLGE- |
| XP_008139950 | GVLKDVIREGAG--ELVMPDA-SVL-VKYSGYLEHMDKPFDSN-CFRKT--PRLMKLGV- |
| XP_010970644 | GVLKDVIREGAG--ELVTPDA-SVL-VKYSGYLEHMDKPFDSN-CFRKT--LRLMKLGE- |
| XP_004021020 | GVLKDVIREGAG--ELVTPDA-SVL-VKYSGYLEHMDKPFDSN-CFRKT--PRLMKLGE- |
| XP_015450070 | GVLKDIIREGAG--ELVTPDA-SVL-VKYSGYLEHMDKPFDSN-CLRKT--PRLMKLGE- |
| XP_017516100 | GVLKAVIREGAG--ELVTPDA-SVL-VKYSGYLEHMDKPFDSN-YFRKT--PRLMKLGE- |
| XP_010342933 | GVLKDVIREGAG--DLVAPDA-TVL-VKYSGYLEHMDRPFDSN-CHRRT--PKLMKLGE- |
| XP_006057167 | GVLKDVIREGAG--ELVTPDA-SVL-VKYSGYLEHMDKPFDSN-CFRKT--PRLMKLGE- |
| XP_019843968 | GVLKDVIREGAG--ELVTPDA-SVL-VKYSGYLEHMDKPFDSN-CFRKT--PRLMKLGE- |
| XP_006201442 | GVLKDVIREGAG--ELVTPDA-SVL-VKYSGYLEHMDKPFDSN-CFRKT--LRLMKLGE- |
| XP_005972252 | GVLKDVIREGAG--ELVTPDA-SVL-VKYSGYLEHMDKPFDSN-CFRKT--PRLMKLGE- |
| XP_004380900 | GVLKDVIREGTG--GLVTPDA-SVL-VKYSGYLEHMDRPFDSN-CFRKT--PRLMKLGE- |
| XP_007468850 | GVLKDVIREGSG--ELVTPDA-SVL-VKYSGYLEHMDKPFDSN-CFRKT--PRLMKLGE- |
| XP_007100027 | GVLKDVIREGSG--ELVTPDA-SVL-VKYSGYLEHMDKAFDSN-CFRKT--PRLMKLGE- |
| XP_008966786 | GVLKDVIREGAG--DLVAPDA-SVL-VKYSGYLEHMDRPFDSN-YFRKT--PRLMKLGE- |
| XP_020017458 | GVLKDVIREGAG--DLVTPDA-SVL-VKYSGYLEHMDKPFDSN-CYRKT--PRLMKLGE- |
| XP_006088351 | GVLKDVIREGAG--ELVVPDA-SVL-VKYSGYLEHMDKPFDSN-CFRKT--PRLMKLGV- |
| XP_020752496 | GVLKDVIREGAG--ELVTPDA-SVL-VKYSGYLEHMDKPFDSN-CFRKT--PRLMKLGE- |
| XP_022444355 | GVLKDVIREGSG--ELVTPDA-SVL-VKYSGYLEHMDKPFDSN-CFRKT--PRLMKLGE- |
| XP_006773483 | GVLKDVIREGAG--ELVVPDA-SVL-VKYSGYLEHMDKPFDSN-CFRKT--PRLMKLGV- |
| XP_012304461 | GVLKDVIREGAG--DLVAPDA-TVL-VKYSGYLEHMDRPFDSN-CHRRT--PKLMKLGE- |
| XP_008591583 | GVLKDVIREGAG--ELVTPDA-SVL-VKYSGYLEHMDKPFDSN-CFRKT--PRLMKLGE- |
| XP_016054558 | GVLKDVIREGAG--ELVTPDA-SVL-VKYSGYLEHMDKPFDSN-CFRKT--PRLMKLGV- |
| XP_011369980 | GVLKDIIREGAG--ELVTPDA-SVL-VKYSGYLEHMDKPFDSN-CLRKT--PRLMKLGE- |
| XP_004268849 | GVLKDVIREGSG--ELVTPDA-SVL-VKYSGYLEHMDKPFDSN-CFRKT--PRLMKLGE- |
| XP_024602987 | GVLKDVIREGSG--ELVTPDA-SVL-VKYSGYLEHMDKPFDSN-CFRKT--PRLMKLGE- |
| XP_019610492 | GVLKDVIREGAG--ELVTPDA-SVL-VKYSGYLEHMDKPFDSN-CFRKT--PRLMKLGE- |
| XP_004317179 | GVLKDVIREGSG--ELVTPDA-SVL-VKYSGYLEHMDKPFDSN-CFRKT--PRLMKLGE- |
| XP_006889852 | GVLKDVIREGVG--DLVTPDA-SVL-VKYSGYLEHMDKPFDSN-CYRKT--PRLMKLGE- |
| XP_007940604 | GVLKDVIREGAG--DLVTPDA-SVL-VKYSGYLEHMDKPFDSN-CFRKT--PRLMKLGE- |
| XP_014411577 | GVLKDVIREGAG--ELVTPDA-SVL-VKYSGYLEHMDKPFDSN-CFRKT--LRLMKLGE- |
| XP_007073943 | GVLKDVIREGAG--ELVTPDA-SVL-VKYSGYLEHMDKPFDSN-CFRKT--PRLMKLGE- |
| XP_006155025 | GVLKHVIREGAG--ELVPPDA-SVL-VKYSGYLEHMDKPFDSN-CFRKT--PRLMKLGE- |
| XP_005328656 | GVLKDVIREGTG--DLVTPDA-SVL-VKYSGYLEHMDKPFDSN-CFRKT--PRLMKLGE- |
| XP_011765609 | GVLKDVIREGAG--DLVAPDA-SVLGVPWGG-----LSAG-SMSSH--SLFLCLLT-    |
| XP_010979058 | GVLKDVIREGTG--ELVTPDA-SVL-VKYSGYLEHMDKPFDSN-CFRKT--LRLMKLGE- |
| XP_006249193 | GVLKDIIREGAG--DPVTPDA-SVL-VKYSGYLEHMDKPFDSN-CFRKT--PRLMKLGE- |
| XP_002722023 | GVLKDVIREGVG--ELVTPDA-SVL-VKYSGYLEHMDKPFDSN-CFRKS--PRLMKLGE- |
| XP_005344683 | GVLKDIIREGAG--DPVTPDA-SVL-VKYSGYLEHMDKPFDSN-YFRKA--PRLMKLGE- |
| XP_020941978 | GVLKDVIREGTG--ELVTPDA-SVL-VKYSGYLEHMDKPFDSN-CFRKT--PRLMKLGE- |
| XP_006859898 | GVLKDVIREGTG--DLVTPDA-AVL-VKYSGYLEHMDKPFDSN-CFRKT--PRLMKLGE- |
| XP_005549416 | GVLKDVIREGAG--DLVAPDA-SVL-VKYSGYLEHMDRPFDSN-YFRKT--PRLMKLGE- |
| XP_024427494 | GVLKDVIREGAG--ELVTPDA-SVL-VKYSGYLEHMDKPFDSN-CFRKT--PRLMKLGE- |
| XP_016001971 | GVLKDIIREGAG--ELVTPDA-SVL-VKYSGYLEHMDKPFDSN-CLRKT--RLMKLGE-  |
| XP_007468849 | GVLKDVIREGSG--ELVTPDA-SVL-VKYSGYLEHMDKPFDSN-CFRKT--PRLMKLGE- |
| XP_014988802 | GVLKDVIREGAG--DLVAPDA-SVL-VKYSGYLEHMDRPFDSN-YFRKT--PRLMKLGE- |
| XP_012584338 | GVLKDVIREGAG--ELVTPEA-SVL-VKYSGYLEHMDKPFDSN-CFRRV--PRLMKLGE- |
| XP_006971358 | GVLKDVIREGTG--DPVTPDA-SVL-VKYSGYLEHMDKPFDSN-CFRKT--PRLMKLGE- |
| XP_004620930 | GVLKDVIREGVG--ELVTPDA-SVL-VKYSGYLEHMDKPFDSN-CSRKT--PRLMKLGE- |
| XP_008696858 | GVLKDVIREGAG--ELVTPDA-AVL-VKYSGYLEHMDKPFASN-CFRKT--PRLMKLGE- |
| XP_021018812 | GVLKDIIREGTG--DTVTPDA-SVL-VKYSGYLEHMDKPFDSN-CFRKT--PRLMKLGE- |
| XP_012782940 | GVLKDVIREGVG--ELVTPDA-SVL-VKYSGYLEHMDKPFDSN-CFRKT--PRLMKLGE- |
| XP_019502388 | GVLKDVIREGAG--ELVTPDA-SVL-VKYSGYLEHMDKPFDSN-CFRKV--PRLMKLGE- |

|              |                                                              |
|--------------|--------------------------------------------------------------|
| XP_021042681 | GVLKDVIREGAG--DPVTPDA-SVL-VKYSGYLEHMDKPFDSN-CFRKT--HRLMKLGE- |
| NP_001264821 | GVLKDIIREGTG--DTVTPDA-SVL-VKYSGYLEHMDKPFDSN-CFRKT--PRLMKLGE- |
| XP_021519217 | GVLKDIIREGAG--DPVTPDA-SVL-VKYSGYLEHMDKPFDSN-CFRKA--PRLMKLGE- |
| XP_005344682 | GVLKDIIREGAG--DPVTPDA-SVL-VKYSGYLEHMDKPFDSN-YFRKA--PRLMKLGE- |
| NP_001349718 | GVLKDVIREGAG--DLVAPDA-SVL-VKYSGYLEHMDRPFDSN-YFRKT--PRLMKLGE- |
| NP_001099392 | GVLKDIIREGAG--DPVTPDA-SVL-VKYSGYLEHMDKPFDSN-CFRKT--PRLMKLGE- |
| XP_005396843 | GVLKDVIREGAG--DLVTPDA-SVL-VKYSGYLEHMDKPFDSN-CFRKT--PRLMKLGE- |
| XP_019502390 | GVLKDVVREGAG--ELVTPDA-SVL-VKYSGYLEHMDKPFDSN-CFRKV--PRLMKLGE- |
| XP_006971357 | GVLKDVIREGTG--DPVTPDA-SVL-VKYSGYLEHMDKPFDSN-CFRKT--PRLMKLGE- |
| XP_008966787 | GVLKDVIREGAG--DLVAPDA-SVL-VKYSGYLEHMDRPFDSN-YFRKT--PRLMKLGE- |
| XP_003500991 | GVLKDIIREGAG--DTVTPDA-SVL-VKYSGYLEHMDKPFDSN-CFRKT--PRLMKLGE- |
| XP_008846596 | GVLKNVIREGAG--DPVTPDA-SVL-VKYSGYLEHMDKPFDSN-CFRKT--PRLMKLGE- |
| XP_021563404 | GVLKDVLRGSG--DLVTPDA-SVL-VKYSGYLEHVDKPFDSN-CFRKT--PQLMKLGM-  |
| XP_018887307 | GVLKDVIREGAG--DLVAPDA-SVL-VKYSGYLEHMDRPFDSN-YFRKT--PRLMKLGE- |
| XP_021018806 | GVLKDIIREGTG--DTVTPDA-SVL-VKYSGYLEHMDKPFDSN-CFRKT--PRLMKLGE- |
| XP_017176678 | GVLKDIIREGTG--DTVTPDA-SVL-VKYSGYLEHMDKPFDSN-CFRKT--PRLMKLGE- |
| NP_291049    | GVLKDIIREGTG--DTVTPDA-SVL-VKYSGYLEHMDKPFDSN-CFRKT--PRLMKLGE- |
| XP_021042679 | GVLKDVIREGAG--DPVTPDA-SVL-VKYSGYLEHMDKPFDSN-CFRKT--HRLMKLGE- |
| XP_010617304 | GVLKDVIREGAG--DLVTPDA-SVL-VKYSAYLEHMDKPFDSN-CFRKT--PRLMKLGE- |
| XP_021519216 | GVLKDIIREGAG--DPVTPDA-SVL-VKYSGYLEHMDKPFDSN-CFRKA--PRLMKLGE- |
| XP_023420891 | GVLKDVIREGAA--DLXTPTP-LXL-VKYSGYLEHMDKPFDSN-CFRKT--PRLMKLGE- |
| XP_006155027 | GVLKDVIREGAG--ELVPPDA-SVL-VKYSGYLEHMDKPFDSN-CFRKT--PRLMKLGE- |
| XP_011765605 | GRWRQLERNDEC--LLVAPEWNAAI-VKYSGYLEHMDRPFDSN-YFRKT--PRLMKLGE- |
| XP_015302699 | GRWRQLERNDEC--LLVAPEWNAAI-VKYSGYLEHMDRPFDSN-YFRKT--PRLMKLGE- |
| XP_011765611 | GVLKDVIREGAG--DLVAPDA-SVL-VKYSGYLEHMDRPFDSN-YFRKT--PRLMKLGE- |
| XP_012597702 | GVLKDVIREGAG--DLVTPDA-SVL-VKYSGYLEHMDKPFDSN-CFRKT--PRLMKLGE- |
| XP_014988803 | GVLKDVIREGAG--DLVAPDA-SVL-VKYSGYLEHMDRPFDSN-YFRKT--PRLMKLGE- |
| XP_010617307 | GVLKDVIREGAG--DLVTPDA-SVL-VKYSAYLEHMDKPFDSN-CFRKT--PRLMKLGE- |
| XP_004666244 | GVLKDVIREGTG--DAVTPDA-TVL-VKYSGYLEHMDKPFDSN-YFRKT--PRLMKLGE- |
| XP_004630630 | GVLKDVIREGAG--DLVTREA-SVL-VKYSGYLEHMDKPFDSN-CFRKT--PRLMKLGE- |
| XP_004840130 | GVLKDVIREGAG--DLVTPDA-SVL-VKYSGYLEHMDKPFDSN-CFRKT--PRLMKLGE- |
| XP_014403986 | KRRRDVTEVRVL--VHFSVSVPSVL-VKYSGYLEHMDKPFDSN-CFRKT--PRLMKLGV- |
| XP_016800790 | GVLKDVIREGAG--DLVAPDA-SVL-VKYSGYLEHMDRPFDSN-YFRKT--PRLMKLGE- |
| XP_014988804 | -----MDRPFDSN-YFRKT--PRLMKLGE-                               |
| ELK06863     | GVLKDIIREGAG--ELVTPDA-SVL-VKYSGYLEHMDKPFDSN-CLRKT--PRLMKLGE- |
| EH08283      | GVLKDVIREGAG--DLVTPDA-SVL-VKYSGYLEHMDKPFDSN-CFRKT--PRLMKLGE- |
| XP_004706046 | GVLKDVLRGTG--DLVAPDS-SVL-VKYSGYLEHMDKPFDSN-YFRKT--PRLMKLGE-  |
| XP_021110082 | GVLKDVIREGAG--DLVTPDA-SVL-VKYSGYLEHMDKPFDSN-CFRKT--PRLMKLGE- |
| XP_007518064 | GVLKDVIREGAG--ELVAPDA-SVL-VKYSGYLEHMDKPFDSN-SYRKT--PRLMKLGE- |
| PN192595     | GVLKDVIREGAG--DLVAPDA-SVL-VKYSGYLEHMDRPFDSN-YFRKT--PRLMKLGE- |
| XP_020861399 | GVLKEVIREGAG--DLVMPDA-SVL-VKYSGYLEHMDKPFDTN-CFRKI--PRLMKLGE- |
| XP_016284889 | GVLKEVIREGSG--DLVTPDA-SVL-VKYSGYLEHMDKPFDSN-CYRKI--PRLMKLGE- |
| XP_016284888 | GVLKEVIREGSG--DLVTPDA-SVL-VKYSGYLEHMDKPFDSN-CYRKI--PRLMKLGE- |
| XP_001519210 | GVLKEIIREGAG--ELVPPDA-SVS-VKYAGYLEHMDQPFDTN-WYRKL--PRLMKLGE- |
| XP_020861404 | GVLKEVIREGAG--DLVMPDA-SVL-VKYSGYLEHMDKPFDTN-CFRKI--PRLMKLGE- |
| XP_014425414 | GVLKEVIRAGTG--EMVPQDA-SVV-VKYSGYLEYMDKPFDTN-SYRRN--PRLMKLGE- |
| XP_004761713 | GVLKDVIREGAG--ELVTPDA-SVL-VKYSGYLEHMDKPFDSN-CFRKT--PRLMKLGE- |
| XP_007441600 | GVLKEIIRNGSG--ETVPPDA--SVLVKFSGYLEHMDRPFDTN-CFRKN--PKLMKLGD- |
| XP_016080873 | GVLKEIIREGAG--ELVPPDA-SVS-VKYAGYLEHMDQPFDTN-WYRKL--PRLMKLGE- |
| XP_024066689 | GVLKEVIRAGAG--EIVPQDA-SVL-VKYSGYLEYVDKPFDTN-WYRRN--PRLMKLGE- |
| XP_019365238 | GVLKEVVNTGSG--ELVPHDA-SVL-VKYSGYLEYMDKPFDTN-RYRRS--SRLMKLGK- |
| XP_019401968 | GVLKEVVRTGSG--ELVPRDA-SVL-VKYSGYLEYMDKPFDTN-RYRRS--SRLMKLGK- |
| XP_013926437 | GVLKEIIRDGSG--ETVPPDS--SVLVKFSGYLEHTDRPFDTN-WFKKN--SKLMKLGE- |
| XP_019401969 | GVLKEVVRTGSG--ELVPRDA-SVL-VKYSGYLEYMDKPFDTN-RYRRS--SRLMKLGK- |
| XP_015269029 | GVLKEVIRAGAG--DVVPAEA--SVLVKFSGYLEHMDRPFDTN-CFKKN--LRLMKLGE- |
| XP_014464913 | GVLKEVVRVGSG--ELVAPDA-SVL-VKYSGYLEYMDKPFETN-CYRRS--SRLMKLGK- |
| XP_006258869 | GVLKEVVRVGSG--ELVAPDA-SVL-VKYSGYLEYMDKPFETN-CYRRS--SRLMKLGK- |
| XP_005344684 | GVLKDIIREGAG--DPVTPDA-SVL-VKYSGYLEHMDKPFDSN-YFRKA--PRLMKLGE- |

|              |                                                               |
|--------------|---------------------------------------------------------------|
| XP_015670323 | GVLKEIIRNGSG--ETVPPDS--SVLVKFSGYLEHTDRPFDTN-WFKKN--PKLMKLGE-  |
| XP_020662988 | GVLKEIIRAGYG--EVVPQDA--SVLVKFSGYLEHMDRPFDTN-CFRKN--PKLMKLKG-  |
| XP_007065519 | GVLKEVIRAGAG--EMVPQDA-SVL-VKYSGYLEYMDKPFDTN-WYRRN--PRLMKLGE-  |
| XP_020662989 | GVLKEIIRAGYG--EVVPQDA--SVLVKFSGYLEHMDRPFDTN-CFRKN--PKLMKLKG-  |
| XP_020662990 | GVLKEIIRAGYG--EVVPQDA--SVLVKFSGYLEHMDRPFDTN-CFRKN--PKLMKLKG-  |
| XP_025051231 | GVLKEVVHVGSG--ELVARDA-SVL-VKYSGYLEYMDKPFETN-CYRRS--SRLMKLKG-  |
| KY033272     | GVLKEVVRVGSG--ELVAPDA-SVL-VKYSGYLEYMDKPFETN-CYRRS--SRLMKLKG-  |
| XP_021018814 | GVLKDIIREGTG--DTVTPDA-SVL-VKYSGYLEHMDKPFDSN-CFRKT--PRLMKLGE-  |
| OBS57796     | GVLKDIIREGAG--DPVTPDA-S-----YMDKPFDSN-CFRKT--PRLMKLGE-        |
| NP_001264822 | GVLKDIIREGTG--DTVTPDA-SVL-VKYSGYLEHMDKPFDSN-CFRKT--PRLMKLGE-  |
| XP_021042683 | GVLKDVIREGAG--DPVTPDA-SVL-VKYSGYLEHMDKPFDSN-CFRKT--HRLMKLGE-  |
| XP_021519218 | GVLKDIIREGAG--DPVTPDA-SVL-VKYSGYLEHMDKPFDSN-CFRKA--PRLMKLGE-  |
| XP_024653358 | GRWRQLERNDEC--LLVAPEWNAAI-VKYSGYLEHMDRPFDSN-YFRKT--PRLMKLGE-  |
| XP_009678488 | GVLKEVLRGAG--ELVPPDA--SVAVKYSGYLEYAEEPFCFN-CYRKL--PRLMKLKG-   |
| XP_015302701 | GRWRQLERNDEC--LLVAPEWNAAI-VKYSGYLEHMDRPFDSN-YFRKT--PRLMKLGE-  |
| XP_003770271 | -PSRSQDPGAAA--GWPRSDS-GSS-VKYSGYLEHMDKPFDTN-CYRKV--PRLMKLGE-  |
| ETE73718     | GVLKEIIQDGS--ETVPPDS--SVLVKFSGYLEHTDRPFDTN-WFKKN--PKLMKLGE-   |
| NP_989052    | GVLKEVIRPGKG--GKVPCDA-TVI-LKYSGYLEHADKPFDTN-CYRRH--PKMMKLGE-  |
| NP_001085204 | GVLKEVIRPGKG--GKVPCDA-TVI-LKYSGYLEHADKPFDTN-CYRRH--PRMMKLQ-   |
| XP_011592867 | GVLKEELRPGSG--QAVPPAA--SVAVKYSGYLEHWDEPFCTN-YYSKF--PGLMKLKG-  |
| XP_010584273 | GVLKEELRPGTG--QAVPPAA--SVAVKYSGYLEHWDEPFCTN-YYSRF--PGLMKLKG-  |
| XP_017946629 | GVLKEVIRPGKG--GKVPCDA-TVI-LKYSGYLEHADKPFDTN-CYRRH--PKMMKLGE-  |
| XP_008109385 | GVLKEILRDGCG--ETVPPGA--SVLIKFSGYLEHMDRPFDTN---CSWKD--PRLMKLQ- |
| XP_021271278 | GVRKELLRHGTG--QVPPAA--TVAVKYSGYLEHMEKPFCTN-CTKKL--PRLMKLGE-   |
| XP_023074397 | GVLKDVIREGAG--DLVAPDA-SVL-VKYSGYLEHMDRPFDSN-YFRKT--PRLMKLGE-  |
| XP_015151391 | GVRKQVLRPGTG--QVPPAA--TVAVKYSGYLEHMEKPFCTN-CTKKL--PRLMKLKG-   |
| XP_018100492 | GVLKEVIRPGKG--GKVPCDA-TVI-LKYSGYLEHADKPFDTN-CYRRH--PRMMKLQ-   |
| POI24993     | GVRKQVLRPGTG--QVPPAA--TVAVKYSGYLEHMEKPFCTN-CTKKL--PRLMKLKG-   |
| PNI92596     | GVLKDVIREGAG--DLVAPDA-SVL-VKYSGYLEHMDRPFDSN-YFRKT--PRLMKLGE-  |
| XP_015736491 | GVRKELLRPGTG--QLVPPAA--TVAVKYFGYLENMEKPFCTN-CTKKL--PKLMKLGE-  |
| XP_010283169 | GVRKEELRPGIG--QAVPPAA--SVAVKYSGYLENGDEPFCTN-CYSKS--PGLMKLKG-  |
| PNJ85879     | GVLKDVIREGGG--DLVAPDA-SVL-VKYSGYLEHMDRPFDSN-YFRKT--PRLMKLGE-  |
| XP_018412624 | GVLKEIIRAGCG--ETVPIDS-TII-AKYSGYLEHSDKPFDTN-WFRN--PRLMKLGE-   |
| XP_010211497 | PVSERELRVLVR--EPCRFGD--ALAVKYSGYLEYADEPFCTN-CYRKV--PRLMKLKG-  |
| XP_017388864 | GVLKDVIREGAG--DLVAPDA-TVL-VKYSGYLEHMDRPFDSN-CHRRT--PKLMKLGE-  |
| XP_008109386 | GVLKEILRDGCG--ETVPPGA--SVLS----YLEHMDRPFDTN---CSWKD--PRLMKLQ- |
| XP_014342809 | GVLKEVIQAGAG--EMVPPSA-SVA-VNFSGYLEYLDKPFDTN-CNKRN--PRLMKLGE-  |
| KFV84016     | GVLKEVLRGAG--ELVPPDA--SVAVKYSGYLEYAEEPFCFN-CYRKL--PRLMKLKG-   |
| XP_013812139 | ARGPQQPAADGP--CSGTGER--FATVKYSGYLEYADEPFCTN-CYRKL--PRLMKLKG-  |
| XP_009643249 | -----MSEDRS--SAPVKYSGYLEHRDEPFCTN-CYSKS--PGLMKLKG-            |
| XP_009928379 | -----KYSGYLEHWDEPFCTN-YYSRF--PGLMKLKG-                        |
| XP_010124464 | -----TYSGFLEHLDEPFCTN-RYGAS--PGLLKLKG-                        |
| XP_009321903 | -----MLV--VTRDGF--LWRLKYTGYLEHWDEPFCTN-CYSKS--PGLMKLKG-       |
| XP_009807780 | -----KYSGYLEHCNEPFCTN-GYSKS--PGLMKLKG-                        |
| XP_009512874 | -----KYSGYLEHWNEPFCTN-CYSKS--PGLMKLKG-                        |
| XP_009586283 | -----KYSGYLEHWKPFCTN-CYSKS--PRLMKLKG-                         |
| KFQ72829     | GVRKEELRPGIG--QAVPPAA--SVAVKYSGYLENGDEPFCTN-CYSKS--PGLMKLKG-  |
| XP_009698973 | -----KYSGYLEHGDEPFCTN-CYSKS--PGLMKLKG-                        |
| XP_009901738 | GVCKHVLRSRG--QLVPPNS--SVEVKYSGYLESDKPFCTN-RNHKV--PELMKLKG-    |
| XP_012887159 | GVLKDIIREGAG--DLVAPDA-LVL-VKFSGYLEHMDKPFDSN-CYRKT--PRLMKLGE-  |
| XP_009940812 | -----M--DILSRTG--ISSMNYSGYLEHGDEPFCTN-SYSKF--PRLMKLKG-        |
| XP_002187983 | GVRKEQLRPGNG--QVPPDA--SVAVKYSGYLGWNKLFCSN-GNSKY--PRLMKLKG-    |
| XP_009887190 | -----MSREAHW--GFLMKYSGYLEHRDEPFCTN-GYSKS--PRLMKLKG-           |
| XP_009486380 | -----KYSGYLEHWKPFCTN-CYSKS--SGLMKLKG-                         |
| KGL76252     | -----AVKYSGYLEYADEPFCTN-CYRKV--PRLMKLKG-                      |
| XP_010306733 | -----KYSGYLEHRDKPFCTN-CYSKF--PGLMKLKG-                        |
| XP_008979919 | GVLKDVIREGAG--DLVAPDA-TVL-VKYSGYLEHMDRPFDSN-CHRRT--PKLMKLGE-  |
| XP_009998510 | -----MLLMA--LSLVNYFGYLEHRDEPF--TK-CCSKF--PKLMKLKG-            |

|              |                                                                  |
|--------------|------------------------------------------------------------------|
| XP_009463122 | PSGAFAWPACQT--ACSP PQG--RPAVKYSGYLEQCDEPFCTN-CYSKF--PGLMKLGK-    |
| XP_007894626 | GALKETLRSGSG--PVVPADA--LVS VYYSAYVEHANEPFDSN-VHRKV--PGFMKLGR-    |
| XP_010022120 | -----KFS GYLEQDQHKPFCTN-CYSKS--PGLMKLGK-                         |
| XP_010083598 | -----RYS GYLEGSDEPFCTN-CNRKY--PRLMKLGR-                          |
| XP_010194269 | -----KFS GYLEQSDEPFCTN-CKS----PRLVKLGK-                          |
| XP_009962683 | -----KYS GYLEHSDEPFCTN-CYSKF--PELMKLGK-                          |
| KFP29338     | -----VKFS GYLEQSDEPFCTN-CKS----PRLVKLGK-                         |
| XP_010147897 | -----MNA--SVAVKYSGYLEQQDEPFCTN-CNSRS--PGLMKLGR-                  |
| KFQ39479     | GVCKEELYPGSG--QVVPNA--SVEVKYSGYLDHWDKPFCTN-RH-----PELLKL GK-     |
| EOB04024     | -----VKYS GYLEHADEPFCTN-CTTKL--PRLMKLGE-                         |
| XP_023675251 | GVLKEVIQNGEG--QLIPMDA--SVLIHFS GYLEYS DRPFESN-NRSKH--PPMMKLGR-   |
| XP_009557002 | ----MADSARLR--VSVRDWL--RAGVKYTG YFEHKEEPFCTN-CHRRF--PGLMKLGK-    |
| XP_008944700 | -----KYS GYLEGSDEPFCTN-GNSKF--PELMKLGK-                          |
| KFP93140     | -----VKYS GYLEHWDEPFCTN-YYSRF--PGLMKLGK-                         |
| KFP44723     | -----AVTYS GFLEHLDEPFCIN-RYGAS--PGLLKL GK-                       |
| XP_017553040 | GILKEVIRAGDG--SPVPMDA--SVSVHYS GFLEYS DRPF DST-THLKF--PRMVKL GK- |
| XP_021396070 | GVRKEQLRPGTG--QPVPPGA--SVAVKYSGYLG NWNKLFCSN-GNSKY--PRLMKLGK-    |
| XP_010143455 | -----KYS GYLEHSDEPFCTN-YHHKV--SKLMKLGR-                          |
| KFQ87275     | -----AVKYS GYLEHWDEPFCTN-CYSKS--PGLMKLGK-                        |
| XP_010891852 | GILKEVVQPGEG--QPVPRDS--SVSIHFS GFLEYS DRPFETT-NQLKY--PRMMKLGR-   |
| XP_009863922 | -----RYS GYLEHQDEPFCTN-WYDRS--HGLMKLGK-                          |
| KFW66808     | -----VKYT GYLEHWDEPFCTN-CYSKS--PGLMKLGK-                         |
| XP_018591809 | GVLKELVHGGDGGGRLCPRNA--TVHIQYS GYLEYS DRPFEST-AHFKH--PQMMKLGT-   |
| KFP21064     | -----VKYS GYLEHRDEPFCTN-CYSKS--PGLMKLGK-                         |
| KFZ64979     | -----AVKYS GYLEHWDEPFCTN-CHSKS--PGLMKLGK-                        |
| KFW73903     | -----VKYS GYLEHWNEPFCTN-CYSKS--PGLMKLGK-                         |
| KFM05579     | -----VKYT GYLEHWDEPFCTN-CYSKS--PGLMKLGK-                         |
| KFV69563     | GVCKHVLRSGTG--QLVPPNS--SVEVKYSGYLEDSDKPFCTN-RNHKV--PELMKLGK-     |
| XP_023823731 | GILKEVVQPGEG--PPVPRDS--SVSINFSGFLEYS DRPFETT-SYLKY--PRMMKLGR-    |
| XP_016346087 | GILKEVVHAGEG--PPVPKHA--SVSIHFS GFIEYS DAPFETT-SHLKF--PRMMKLGR-   |
| KFV51798     | -----VKYS GYLEHCNEPFCTN-GYSKS--PGLMKLGK-                         |
| KFW03341     | GVRKKELWPAG--PTVPMNA--SVAVKYSGYLEQQDEPFCTN-CNSRS--PGLMKLGR-      |
| KFV99355     | -----VKYS GYLEHWDKPFCTN-CYSKS--PRLMKLGK-                         |
| AXB56102     | GIRKEVLRPGSG--ELVPPDA--TVAVKYS GYLEGMEEPFC TY-QTKGF--PRLMKLGV-   |
| XP_018958387 | GILKEVVHAGEG--PPVPKHA--SVSIHFS GFIEYS DAPFETT-NHLKF--PRMMKLGR-   |
| XP_019903677 | GILKEVVQPGEG--QPVPRDS--SVSIHFS GFLEYS DRPFETT-NQLKY--PRMMKLGR-   |
| KFU91562     | -----VNYFGYLEHRDEPF- TK-CCSKF--PKLMKL GK-                        |
| XP_017314960 | GIRKEVVREGE G--PLVPRDA--SVSVHFS GFLEYADQPFEST-RGSKF--PKMMKL GK-  |
| XP_016393789 | GILKEVVHAGEG--PPLPKHA--SVSIHFS GFIEYS DAPFETT-SLLKF--PRMMKLGR-   |
| XP_009093115 | GVRKEQLRPGTG--QPVPPSA--SVAVKYSGYLG NWNKLFCSN-GNSKY--PRLMKLGK-    |
| XP_023869471 | GILKEVVQPGEG--PPVPRDS--SVSIHFS GFLEYS DRPFETT-SHLKY--PRMMKLGR-   |
| XP_019903679 | GILKEVVQPGEG--QPVPRDS--SVSIHFS GFLEYS DRPFETT-NQLKY--PRMMKLGR-   |
| XP_019903678 | GILKEVVQPGEG--QPVPRDS--SVSIHFS GFLEYS DRPFETT-NQLKY--PRMMKLGR-   |
| XP_014110391 | GVRKERLCPGTG--QPVPPSA--SVAVKYSGYLG NWNKLFCSN-GNSKY--PRLMKLGK-    |
| XP_017314964 | GIRKEVVREGE G--PLVPRDA--SVSVHFS GFLEYADQPFEST-RGSKF--PKMMKL GK-  |
| XP_019903676 | GILKEVVQPGEG--QPVPRDS--SVSIHFS GFLEYS DRPFETT-NQLKY--PRMMKLGR-   |
| XP_015502317 | GVRKEQLCPGTG--QPVPPSA--SVAVKYSGYLG NWNKLFCSN-GNSKY--PRLMKLGK-    |
| XP_020341240 | GILKEVVQPGEG--PPVPRDS--SVSIHFS GFLEYS DRPFETT-SHLKY--PRMMKLGR-   |
| NP_001122145 | GVLKEVIHEGE G--PPVSMHA--SVSINFSGFIEYTDAPFETT-NHLKY--PRMMKL GK-   |
| OWK52486     | GVRKEQLRPGTG--QPVPPGA--SVAVKYSGYLG NWNKLFCSN-GNSKY--PRLMKLGK-    |
| XP_013992803 | GILKEVVQPGEG--PPVPRDS--SVSIHFS GFLEYS DRPFETT-SHLKY--PRMMKLGR-   |
| XP_024287707 | GILKEVVQPGEG--PPVPRDS--SVSIHFS GFLEYS DRPFETT-SHLKY--PRMMKLGR-   |
| AAH54673     | GVLKEVIHEGE G--PPVPMHA--SVSINFSGFIEYTDAPFETT-NHLKY--PRMMKL GK-   |
| KFP60963     | -----VKYS GYLEHGDEPFCTN-CYSKS--PGLMKLGK-                         |
| XP_018958370 | GILKEVVHAGEG--PPVPKHA--SVSIHFS GFLEYS DTPFETT-SHLKY--PRMMKLGR-   |
| KGL96380     | -----AVKYS GYLEHRDEPFCTN-GYSKS--PRLMKLGK-                        |
| XP_016148031 | GILKEVVHAGEG--PPVPKHA--SVSIHFS GFIEYS DAPFETT-SHLKF--PRMMKLGR-   |
| XP_007245276 | GIFKEVIRAGDG--PAVQRDS--TVSVNFSAFLEYADQPF DSS-THLKF--PKMMKL GK-   |

|              |                                                              |
|--------------|--------------------------------------------------------------|
| XP_023794776 | GVRKERLCPGTG--QPVPPSA--SVAVKYSGYLGNNKLFCSN-GNSKY--PRLMKLGK-  |
| XP_021479427 | GILKEVVQPGEG--PPVPRDS--SVSIHFSGFLEYSRPFETT-SHLKY--PRMMKLGR-  |
| KFR16943     | -----AVNYSGYLEHGDEPFCTN-SYSKF--PRLMKLGK-                     |
| XP_009988051 | -----MLV--LTRDRFG--LWRLKYSGYLEHTGEPPFCTT-YNSKS--PELMKLGR-    |
| KFV16869     | -----SVRYSGYLEGSDPEPFCTN-CNRKY--PRLMKLGR-                    |
| KFO13846     | -----VKYSGYLEHRDKPFCTN-CYSKF--PGLMKLGK-                      |
| XP_020373313 | GVLKEILRPGSG--SVIPSTA--SVSVHYSAYSEYTDKPFDSN-VQRDV--PRFMKLGR- |
| XP_006640997 | GILKEVIHPGVG--QLVPENA--SVSFRYAGFLEYSDSPFESN-SYLKH--PRLMRLGR- |
| XP_020341239 | GILKEVVQPGEG--PPVPRDS--SVSIHFSGFLEYSRPFETT-SHLKY--PRMMKLGR-  |
| KQK73326     | -----MCPAC--RHPVKFSGYLEHQDKPFCTN-CYSKS--PGLMKLGK-            |
| XP_008500186 | -----MPTLRQ--AGFPPT--YACMNYFGFLEDKDKPFCTH-LDSKS--SKLMKLGT-   |
| XP_013992801 | GILKEVVQPGEG--PPVPRDS--SVSIHFSGFLEYSRPFETT-SHLKY--PRMMKLGR-  |
| XP_016350445 | GILKEVVHAGEG--PPVPKHA--SVSIHFSGFIEYSDTPFETT-SHLKY--PRMMKLGR- |
| KFV47875     | -----VKYSGYLEHSDEPFCTN-CYSKF--PELMKLGR-                      |
| XP_022534491 | GIFKEVIRAGDG--PAVQRDS--TVSVNFSAFLEYADQPFDS--THLKF--PKMMKLGR- |
| XP_021479426 | GILKEVVQPGEG--PPVPRDS--SVSIHFSGFLEYSRPFETT-SHLKY--PRMMKLGR-  |
| KFQ96759     | -----AVKYSGYLEQCDEPFCTN-CYSKF--PGLMKLGK-                     |
| XP_012685286 | GILKRVIQPGDG--PLVPRDA--SVSVNLSGYLEYCDDPFETT-KKLKH--PRMMKLGR- |
| KFQ41466     | -----VKFSGYLEDQHKPFCTN-CYSKS--PGLMKLGK-                      |
| XP_024997748 | GVRKQVLRPGTG--QPVPPAA--TVAVKYSGYLEHMEKPFCTN-CTKKL--PRLMKLGK- |
| KFQ35533     | -----PLP--LTLG-----CTVKYSGYLEGSDPEPFCTN-GNSKF--PELMKLGR-     |
| XP_020459257 | GILKEVVQPGEG--ASIPPNA--SILIIYSGFLEYSQPFETN-RDFKY--PRMMKLGR-  |
| XP_017264554 | GILKEVVQPGEG--PPVPQNA--SVLMYYSGFLEYSQPFDTT-THLKY--PPMMKLGR-  |
| XP_005917667 | GILKEVVQPGEG--PPVPENA--SVLIHYSGFLEYSQPFETT-THLKY--PRMMKLGR-  |
| XP_022621130 | GILKEVVQPGEG--PPVPQNA--SVLIHYSGFLEYSQPFETT-TNLKY--PQMMKLGR-  |
| XP_005725080 | GILKEVVQPGDG--PPVPENA--SVLIHYSGFLEYSQPFETT-THLKY--PRMMKLGR-  |
| XP_010408101 | --YEIKLLLFPP--SPLLALG---CTVKYSGYLGNNNLFCSN-ESSKY--PRLMKLGK-  |
| KFO74526     | -----VKYTGYFEHKEEPFCTN-CHRRF--PGLMKLGK-                      |
| XP_005449739 | GILKEVVQPGEG--PPVPENA--SVLIHYSGFLEYSQPFETT-TNLKY--PRMMKLGR-  |
| XP_023285908 | GILKEVVQPGEG--SPVPQNA--SVLIHYSGFLEYSQPFETT-TNFKY--PQMMKLGR-  |
| XP_015502316 | GVRKEQLCPGTG--QPVPPSA--SVAVKYSGYLGNNKLFCSN-GNSKY--PRLMKLGK-  |
| XP_004542108 | GILKEVVQPGEG--PPVPENA--SVLIHYSGFLEYSQPFETT-THLKY--PQMMKLGR-  |
| XP_023823730 | GILKEVVQPGEG--PPVPRDS--SVSR----FLEYSRPFETT-SYLKY--PRMMKLGR-  |
| XP_020459258 | GILKEVVQPGEG--ASIPPNA--SILIIYSGFLEYSQPFETN-RDFKY--PRMMKLGR-  |
| XP_008634949 | --YEIKLLLFPP--SPLLALG---CTVKYSGYLGNNNLFCSN-ESSKY--PRLMKLGK-  |
| XP_013883182 | GILKQVVLPGEG--PPVPQNS--SVLMYYSGFLEYSQAFDST-THLKY--PPMMKLGR-  |
| XP_019947232 | GIMKEVVQPGEG--PPISQNA--SVLIHYSGFLEYSQPFETT-TNFKH--PRLMKLGK-  |
| KFP85199     | -----VRYSGYLEHQDEPFCTN-WYDRS--HGLMKLGK-                      |
| PWA27518     | GILKEVVQPGEG--PPVPQNA--SVIMYYSGYLEYSNQPFEST-AHLQY--PPLMKLGR- |
| XP_003971664 | GILKELVQAGDG--PPVPYNA--SVLMHYSGYLEYSNVPFETN-TYQRF--PKIMKLGR- |
| XP_005917666 | GILKEVVQPGEG--PPVPENA--SVLIHYSGFLEYSQPFETT-THLKY--PRMMKLGR-  |
| XP_013764145 | GILKEVVQPGDG--PPVPENA--SVLIHYSGFLEYSQPFETT-THLKY--PRMMKLGR-  |
| XP_013764144 | GILKEVVQPGDG--PPVPENA--SVLIHYSGFLEYSQPFETT-THLKY--PRMMKLGR-  |
| CAG01803     | GILKEVVQAGDG--PPVPHNA--SVLMHYSAYLDYSNVPFETN-THQRF--PSIMKLGR- |
| XP_005449738 | GILKEVVQPGEG--PPVPENA--SVLIHYSGFLEYSQPFETT-TNLKY--PRMMKLGR-  |
| KFV20040     | -----VKYSGYLEHTGEPPFCTT-YNSKS--PELMKLGR-                     |
| XP_018551539 | GILKEVVHPGEG--PPVPQNA--SVLIHYSGFLEYSHPFETT-VNFKY--PQMMKLGR-  |
| XP_004542106 | GILKEVVQPGEG--PPVPENA--SVLIHYSGFLEYSQPFETT-THLKY--PQMMKLGR-  |
| XP_005808385 | GILKEVVQPGEG--PPVPQNA--SVIMYYSGYLEYSNQPFEST-SHLQY--PPMMKLGR- |
| KFO85715     | -----VKYSGYLEHSDEPFCTN-YHHKV--SKLMKLGR-                      |
| XP_015236136 | GILKEVVRSSEG--PPVPQNA--SVIMYYSGYLEYSNHPFEST-AHLKY--PPMMKLGR- |
| XP_023794777 | --TRRRYPSIGM--ALKLSQN--HLAVKYSGYLGNNKLFCSN-GNSKY--PRLMKLGK-  |
| XP_015803473 | GILKEVVHPGEG--PPVPLNA--SVLMYYSGFLEYSQPYESN-TYIKH--PPLMKLGK-  |
| KPP68264     | --LAGVTHRLD---LC-----VFAVQYSGYLEYSRPFEST-AHFKH--PQMMKLGT-    |
| XP_020488061 | GILKEVIQPGDG--PPVPRNA--SVLIHYSGFLEYSHPFETT-TNLKY--PQMMKLGR-  |
| XP_015332442 | GVLKDVIREGTG--DLVTPDA-SVL-VKYSGYLEHMDKPFDSN-CFRKT--PRLMKLGE- |
| XP_013764143 | GILKEVVQPGDG--PPVPENA--SVLIHYSGFLEYSQPFETT-THLKY--PRMMKLGR-  |
| XP_005449737 | GILKEVVQPGEG--PPVPENA--SVLIHYSGFLEYSQPFETT-TNLKY--PRMMKLGR-  |

KFO61461  
 XP\_008298046  
 KFP07119  
 XP\_007561093  
 PKU35662  
 XP\_010793476  
 AWP19851  
 KFW82601  
 XP\_008396659  
 XP\_010739761  
 XP\_022046121  
 XP\_019715044  
 XP\_018875413  
 XP\_014327714  
 XP\_009081377  
 AWP19849  
 XP\_023134576  
 XP\_012734526  
 XP\_014403985  
 XP\_017553083  
 XP\_023869472  
 XP\_013992804  
 XP\_020774925  
 XP\_024287709  
 XP\_023869475  
 XP\_013992805  
 XP\_023869476  
 XP\_024287708  
 XP\_023869474  
 XP\_011490382  
 XP\_020570387  
 XP\_008396657  
 XP\_014851597  
 XP\_020570386  
 XP\_008396658  
 XP\_018774793  
 XP\_023794778  
 XP\_024147377  
 XP\_024147375  
 XP\_024147378  
 XP\_014851599  
 XP\_008396660  
 XP\_017593619  
 XP\_008396661  
 XP\_014851600  
 XP\_019619874  
 XP\_016801711  
 XP\_023710706  
 XP\_020627099  
 XP\_006793207  
 XP\_011402831  
 XP\_022801008  
 XP\_013786360  
 XP\_022254671  
 ELT98785  
 XP\_021353947  
 XP\_022108900  
 XP\_022108899

-----VKYSGYLGNNLFCN-ESSKY--PRLMKLGK-  
 GILKQVVPGE--PPVPQNA--SVLIHYSGFLEYSQPFETT-TNFRF--PQMMKLGR-  
 -----VNYFGFLEDKDKPFCTH-LDSKS--SKLMKLGT-  
 GILKEVVQPGEG--PPVPQNA--SVIMYYSGYLEYSNQPFEST-AHLKY--PPMMKLGR-  
 GVRKEELRPGSG--RAVPPGA--SVAVKYSGFLEHCDPEFCTN-CYSKS--PRLMKLGK-  
 GILKEVIQPGDG--PPVPENA--SVIAHYSGFLEYSQPFETT-TNLKY--PRMMKLGR-  
 GILKEVVSQSG--PPVPQNA--SVLVHYSGFLEYSRPFDDT-TNFRH--PRMMKLGR-  
 -----PHSS--LCTVKYSGYLGNNLFCN-GHGKY--PKLMKLGR-  
 GILKEVVQPGEG--PPVPQNA--SVIMYYSGFLEYSNQPFEST-AHLKY--PPMMKLGR-  
 GIMKEVVQPGDG--PPVPQNA--SVLIHYSGFLEYSRPFETT-THLRY--PRMLKLGR-  
 GILKEVVQPGDG--PPVPQNA--SVLMHYSGFLEYSQPFETT-TNFRY--PPMMKLGR-  
 GIFKEVISPGYG--PPVPSA--SVLIHYSGFLEYSQPFETT-TRLKH--PRLMKLGR-  
 GVLKDVIREGAG--DLVAPDA--SVLKYSGYLEHLDLPFDSN-YFRKT--PRLMKLGE-  
 GILKEVVQPGEG--PPVPQNA--SVIMYYSGYLEYSNQPFEST-SHLQY--PPMMKLGR-  
 -----KYCGYLGNNLFCN-WNSKY--PKLMKLGR-  
 GILKEVVSQSG--PPVPQNA--SVLVHYSGFLEYSRPFDDT-TNFRH--PRMMKLGR-  
 GILKEVVQPGEG--PPVPQNA--SVLIHYSGFLEYSQPFETT-TNFRY--PVMMKLGR-  
 GILKEVVKPGEG--PPVPQNA--SVLMYYSGFLEYSNQPFEST-THFKY--PPMMKLGR-  
 ERRRDVTEVRVL--VHFSVSVPSVL-VKYSGYLEHMDKPFDSN-CFRKT--PRLMKLGV-  
 GILKEVIRAGDG--SPVPMDA--SVSVHYSGFLEYSRPFDDT-THLKF--PRMVKLGR-  
 GILKEVVQPGEG--PPVPRDS--SVSIHFSGFLEYSRPFETT-SHLKY--PRMMKLGR-  
 GILKEVVQPGEG--PPVPRDS--SVSIHFSGFLEYSRPFETT-SHLKY--PRMMKLGR-  
 GIMKQVVPGE--PPVPENA--SVIMHYSGFLEYSQPFETT-LNVKH--PRIMKLGR-  
 GILKEVVQPGEG--PPVPRDS--SVSIHFSGFLEYSRPFETT-SHLKY--PRMMKLGR-  
 GILKEVVQPGEG--PPVPRDS--SVSIHFSGFLEYSRPFETT-SHLKY--PRMMKLGR-  
 GILKEVVQPGEG--PPVPRDS--SVSIHFSGFLEYSRPFETT-SHLKY--PRMMKLGR-  
 GILKEVVQPGEG--PPVPRDS--SVSIHFSGFLEYSRPFETT-SHLKY--PRMMKLGR-  
 GILKEVVQPGEG--PPVPRDS--SVSIHFSGFLEYSRPFETT-SHLKY--PRMMKLGR-  
 GILKEVVQPGEG--PPVPRDS--SVSIHFSGFLEYSRPFETT-SHLKY--PRMMKLGR-  
 GILKEVVQPGEG--PPVPRDS--SVSIHFSGFLEYSRPFETT-SHLKY--PRMMKLGR-  
 GVLKEVLHPGEG--PPVPQNA--SVLVHYSGFLEYSQPFETT-THLKH--PRLLMKGR-  
 GVLKEVLHPGEG--PPVPQNA--SVLVHYSGFLEYSQPFETT-THLKH--PRLLMKGR-  
 GILKEVVQPGEG--PPVPQNA--SVIMYYSGFLEYSNQPFEST-AHLKY--PPMMKLGR-  
 GILKEVVQPGEG--PPVPQNA--SVIMYYSGFLEYSNQPFEST-AHLKY--PPMMKLGR-  
 GVLKEVLHPGEG--PPVPQNA--SVLVHYSGFLEYSQPFETT-THLKH--PRLLMKGR-  
 GILKEVVQPGEG--PPVPQNA--SVIMYYSGFLEYSNQPFEST-AHLKY--PPMMKLGR-  
 GVRKEQLRPGTG--QVPPSA--SVAVKYSYLGNNLFCN-GNSKY--PRLMKLGK-  
 GVRKERLCPGTG--QVPPSA--SVAVKYSYLGNNLFCN-GNSKY--PRLMKLGK-  
 GIFKEVLHPGEG--PPVPQNA--TVSVHYSGFLEYADQPFETT-TNLLH--PRLKLTGR-  
 GIFKEVLHPGEG--PPVPQNA--TVSVHYSGFLEYADQPFETT-TNLLH--PRLKLTGR-  
 GIFKEVLHPGEG--PPVPQNA--TVSVHYSGFLEYADQPFETT-TNLLH--PRLKLTGR-  
 GILKEVVQPGEG--PPVPQNA--SVIMYYSGFLEYSNQPFEST-AHLKY--PPMMKLGR-  
 GILKEVVQPGEG--PPVPQNA--SVIMYYSGFLEYSNQPFEST-AHLKY--PPMMKLGR-  
 --YEIKLLLPF--SPLLALG--CTVKYSGYLGNNLFCN-ESSKY--PRLMKLGK-  
 -----MYSGFLEYSNQPFEST-AHLKY--PPMMKLGR-  
 -----MYSGFLEYSNQPFEST-AHLKY--PPMMKLGR-  
 GVVKVVLKQGVG--DVVPAGA--YVRVHYNGYLEYDEPFDDSS-RLRNE--ELRFRLAT-  
 -----SIL-VKYSGYLEHLDLPFYSN-YFRKT--PRLMKLGE-  
 KIKKREIRPGIG--CVVPEKA--VTVHYNAYVEYSDEPYDSTWLRG-Y--PMVGRLGQ-  
 GVLKQIVRQGTG--PVVPQGA--TVRYHYNGYLEFNDEPFDDSS-RLRGR--PDVGKL--  
 GILKEVVQPGEG--PPVPENA--SVLIHYSGFLEYSQPFETT-TNLKY--PRMMKLGR-  
 MVFKKIIRPGIG--LSIPEGA--TVKVHYNGYLEYDEPYDST-RLRNK--PLTIRLGT-  
 GVFKRMIRKGTG--PVVPEGA--TVRYHYNGYLEFNDEPFDDSS-RLRNK--PEIHLK--  
 GVLKKEVKPGIG--PVVSKGA--FVTVHYNSYLEYSEEPFDST-RLRNL--PFKFLDR-  
 GVLKKEVKPGIG--PVVSKGA--FVTVHYNSYLEYSEEPFDST-RLRNL--PFKFLDR-  
 GVKKEVLQQGVG--DVVDPKS--YVTVHYNGRFEYSDEPFDDST-TLRGQ--PRKFALGE-  
 GVVKKILTHGAG--NVIPEGA--IVSIHYNGFLEYSDEPFDDSS-RLRNA--PIKKQLGK-  
 GVKKRVKKVGS--EVFQEGW--TATIHGYFEYCDVPYDSS-KLRNK--PQKITLGE-  
 GVKKRVKKVGS--EVFQEGW--TATIHGYFEYCDVPYDSS-KLRNK--PQKITLGE-

|              |                                                                 |
|--------------|-----------------------------------------------------------------|
| XP_002167164 | LVLKKIMKQGS--PVIPPNS--LCRVHYNGYIEYSDEPFDDSS--RLRGK--QHQFKLGS-   |
| KOF62423     | -----SPVHYTGFFFEFADEPFDDSS--RLRGE--VFKFRLRK-                    |
| XP_014790271 | SDLRECSEAMF---ELKKSE--IQHVHYTGFFFEFADEPFDDSS--RLRGE--VFKFRLRK-  |
| XP_001636239 | GVLKKIIRQGTG--PVVPKTA--TVRFHSNGYKEFCDEPYDSS--RFRGK--PEQMRLG--   |
| XP_023237057 | QIFKKELKTGFG--IELPSKA--FVTIHYNAYLEYSDPEFDDST--RLRGT--PLKFVLGE-  |
| XP_002128893 | GVKKMIRKEGVG--SVVPSGS--KVRIHYNGYMEDLDEPFDDSS--RIRNQ--PLQITLEQ-  |
| XP_009051935 | GVMKTVLKPGAG--NVVPAQS--LVRIHYNLYLEGSDEPFDDSS--RLRGE--ICKFRLGQ-  |
| XP_012221039 | KVMKYIKQKGVG--EVVP--HNAQVTIHYIGYFEHRDEPFDDST--YISGR--PKIMRVGQ-  |
| XP_012264923 | KVFKAVKKPGVG--DVVP--KDAMVTITYWGYFEYRDEPFDDSS--VFRQS--SERIRLNQ-  |
| XP_009857551 | GVKKMIRKEGVG--SVVPSGS--KVRIHYNGYMEDLDEPFDDSS--RIRNQ--PLQITLEQ-  |
| XP_015515854 | KIFKSVKQVGVG--EVVP--MDAMVYVQYMGYFEYQDEPFDDSS--YLRQT--SERVRLNK-  |
| XP_011415211 | MVFKKVLQQGS--AIVPEGA--IVRIHYNGYLEFGDEPFDDST--RLRNS--PYKVKLQT-   |
| XP_020909274 | GVLKKILRPGVG--PVVPRTA--TLRFHYNAYREFGDEPYDSS--RFRGK--PESARLG--   |
| EKC39444     | MVFKKVLQQGS--AIVPEGA--IVRIHYNGYLEFGDEPFDDST--RLRNS--PYKVKLQT-   |
| XP_013405452 | GVLKQVLKPGTG--DVVPKEA--FVQVHYNGYLEYSGEFDDST--RLRDR--QFRFQLGK-   |
| XP_011148430 | KVMKFTKQKGIG--EVVP--YNAQVTVHYIGYFEDNDEPFDDSS--YASGK--PRTLRLGQ-  |
| XP_013405451 | GVLKQVLKPGTG--DVVPKEA--FVQVHYNGYLEYSGEFDDST--RLRDR--QFRFQLGK-   |
| PVD31214     | GVFKKVLRPGAG--PVVPRNS--LVRVHYNAYKEGEEEPDDSS--RLRTE--VDKFHLFR-   |
| PIK39047     | GVWKMVVNNGTG--PVVPGY--RIQVHYNSYLEYSDEPMDST--RLRSE--TKKFILGN-    |
| XP_022336187 | MVFKKILQOGTG--NVVPEGA--IVRIHYNGYLEFGDEPFDDST--RLRNT--PYKVKLQT-  |
| XP_022337811 | MVFKKILQOGTG--NVVPEGA--IVRIHYNGYLEFGDEPFDDST--RLRNT--PYKVKLQT-  |
| XP_014787871 | GVFKETKHPGYG--PGITENS--VVEVHYAGFFEYRDEPFDDSS--RLRDE--TFKVRVGS-  |
| EFN78601     | KVMKFTKQKGIG--EVVP--YNAQVTVHYIGYFEDNDEPFDDSS--YASGK--PRTLRLGQ-  |
| XP_014475449 | KVMKFIKQKGVG--EVIP--NNAQVTIHYLGYLEDNDEPFDDST--YICGK--PKTLRLGQ-  |
| XP_014279621 | KVSKLILRFGNG--NVVPPKS--VVYFHYNSYLEMEEIPDDSSYLRLNEK--PLRMQLGH-   |
| XP_022193504 | RIMKRMKKQGMG--EMISNAG--VYYYHYSAYVNLQEEPFDDNS--YLRRHRRPERLVLGK-  |
| XP_014204130 | EILKLIKTEGHG--ETIP--KDAQVTVEYVGYFEHQDEPFDDSTFYMRDK--KAILRLGR-   |
| KOX75315     | KIMKLIKQKGVG--NCVP--FDAQVTIKYIGHVEHVDEPFDDSS--FARGE--AESFCLNE-  |
| XP_014234164 | KILKIIKRDGVG--DVVP--PDAQVTVEYVGYFEYSQDPDDSTLHFHPSK--RMVIRLGK-   |
| KII63942     | GVLKTIIRRGQG--PVVPENS--VCRVHYSAYIQGDLEPFDDST--RARRG--HAMITIGKN  |
| XP_024936423 | KVMKVVRQNGVG--EIIP--CNAQVTIKYIGYFEYQDEPFDDST--YNNRN--AYTLNLSC-  |
| XP_015586170 | KVMKVVRQNGVG--EIIP--CNAQVTIKYIGYFEYQDEPFDDST--YNNRN--AYTLNLSC-  |
| XP_003486736 | KVMKLIKQEGVG--TVIP--CDAQVSIKYIAHFESDEPFDDSS--FAHGD--TETLHLGE-   |
| XP_019882220 | KVMKYVKQKGVG--EVVP--ANGQITFHYIGYFEDRDEPFDDST--YSSGK--PRTLRLGQ-  |
| XP_003402471 | KVMKLIKQEGVG--TVIP--CDAQVSIKYIAHFESDEPFDDSS--FAHGD--TETLHLGE-   |
| XP_012134979 | KVMKLIKQKGVG--EPVP--YDAQVTVKYIGHFEYRDEPFDDSS--FTRGG--TDTFCLNQ-  |
| XP_017756606 | KVMKLIKQKGVG--NVVP--HDAQVTIKYVGHFEYRDEPFDDSS--FIRGE--AETFYLNQ-  |
| XP_012134978 | KVMKLIKQKGVG--EPVP--YDAQVTVKYIGHFEYRDEPFDDSS--FTRGG--TDTFCLNQ-  |
| XP_003700792 | KVMKLIKQKGVG--EPVP--YDAQVTVKYIGHFEYRDEPFDDSS--FTRGG--TDTFCLNQ-  |
| XP_023290805 | QVLKLVKKEGVG--ETMP--YNSQVTVHYIGYLEHQDDPFDDST--YIRGK--PAVLRLNE-  |
| XP_012270499 | QVLKLVKKEGVG--ETMP--YNSQVTVHYIGYLEHQDDPFDDST--YIRGK--PAVLRLNE-  |
| XP_018309319 | KVMKYVKQRGVG--EIIP--NNAQAIHVHYIGYFEYRDEPFDDST--YSIGK--PRSLRLGQ- |
| XP_012062619 | KVMKYVKQKGAG--ELIP--NNAQAIHYIGYFEYRDEPFDDST--YSVGK--PRSLRLGQ-   |
| XP_012527508 | KVMKLVKQKGVG--DVVP--DNALATVHYIGYFEYRDEPFDDST--YSSGK--PRSLRLGK-  |
| XP_005089179 | GVLKEMKTPGIG--GLVAEGA--LVSFHYNAYTDVGQAPYDSSRLRD--Q--YSKLRLGT-   |
| XP_003424555 | EILKLIKKEGIG--EVIP--KDAQATVEYVGYFEFQDEPFDDSTLHFHREK--RATLNLGK-  |
| XP_018055399 | KVMKYVKQKGTG--ELIP--NNAQAIHYIGYFEYRDEPFDDST--YSVGK--PRSLRLGQ-   |
| XP_017877748 | KIMKLIKKEGIG--NTVP--KDAQVTVKYIGYFEYRDDPFDDSS--FTRGG--SDILRLGQ-  |
| XP_018399012 | KVMKYVKQKGVG--VIIP--ENQAIVHYIGYFEYRDEPFDDST--YSVGR--PRSLRLGQ-   |
| KYM99352     | KVMKYVKQKGVG--VIIP--ENQAIVHYIGYFEYRDEPFDDST--YSVGR--PRSLRLGQ-   |
| XP_018309322 | VVMKYVKQRGVG--EIIP--NNAQAIHVHYIGYFEYRDEPFDDST--YSIGK--PRSLRLGQ- |
| XP_011647883 | KVMKFVKQKGIG--EVVP--CNAQITIHYIGYFEYRDEPFDDST--YSTGN--PRTLRLGQ-  |
| XP_014247948 | KVKKKILRQG--T--VOLPPNA--AVYIQYNSYLELEEVPFDDSSYLRSKH--PFRLQLGL-  |
| XP_011064230 | KVMKYVKQKGVG--KIIP--PNAQAIHVHYVGYFEYRDEPFDDSA--YCVGK--PRSLRLGQ- |
| XP_014613253 | KIMKLIKRRGAG--AMVS--FKSQVTIKYISFFEYSDEPFDDST--FAQGK--PKTIRLDH-  |
| XP_002430548 | FVKKQIIVCGIG--AVVPENS--YVTVHYNLYKEHHDLPDDSTYFRN--K--PEKFRLDQ-   |
| XP_014247946 | KVKKKILRQG--T--VOLPPNA--AVYIQYNSYLELEEVPFDDSSYLRSKH--PFRLQLGL-  |
| XP_014270488 | EIKKMILNRGRG--ELVSSDA--VVYLHNCYLEMQDIPDDSSYQRN--K--PLHIQMG-     |



ORY30517  
 XP\_011330216  
 EGI60945  
 XP\_001201219  
 XP\_011061927  
 XP\_018356457  
 XP\_011173578  
 XP\_018356456  
 XP\_016917008  
 XP\_018374414  
 XP\_016917007  
 XP\_019882221  
 XP\_011191641  
 PFH33404  
 XP\_019876143  
 XP\_014299498  
 KOC63519  
 XP\_015126020  
 XP\_005186588  
 XP\_011879049  
 XP\_013109471  
 XP\_011879048  
 XP\_018333359  
 EFZ09302  
 XP\_016927793  
 XP\_006611831  
 XP\_014245088  
 XP\_018790058  
 XP\_020893545  
 XP\_002092689  
 XP\_020293583  
 XP\_016952968  
 XP\_003689972  
 XP\_015185328  
 XP\_024867102  
 XP\_011130643  
 XP\_011206843  
 XP\_008560701  
 XP\_011695993  
 PIK55877  
 XP\_022218357  
 XP\_017120033  
 XP\_022165811  
 XP\_017070534  
 XP\_001942690  
 XP\_003883131  
 XP\_014091483  
 XP\_015376375  
 KOF66856  
 XP\_015431627  
 ORX48915  
 XP\_001958659  
 XP\_013077159  
 XP\_013077158  
 XP\_016974015  
 KFG33606  
 XP\_017045419  
 PUA87907  
 KLRKRRIQEGTGD-LISR-YS--DVSVHYTGRLHPSGTFDSS-LDRNK--PLEFKVSE-  
 KVMKYIKQKGTG--KGVP--DNAQVTVHYIGYFEYRDEPFDSS-YSSGK--PRVLRLE-  
 KVMKYVKQKGVG--EIIP--NNAQAIVHYIGYFEYRDEPFDST-YSVGR--PRALRLGQ-  
 KVLKSLKQGTG--ALPIVGM--TLTVHYNCYVEYSDEPYDST-RLRNR--PERCKLGA-  
 KVMKYVKQKGVG--EIIP--NNAQAIVHYIGYFEYRDEPFDST-YSVGR--PRALRLGQ-  
 KVMKYIKQKGVG--EIIP--NNAQAIVHYIGYFEYRDEPFDST-YSVGR--PRSLRLGQ-  
 KVMKFVKQKGVG--EVIP--SNAHATVHYIGYFEYRDEPFDST-YSCGK--PRSLRLGQ-  
 KVMKYIKQKGVG--EIIP--NNAQAIVHYIGYFEYRDEPFDST-YSVGR--PRSLRLGQ-  
 KVMKLIKQKGVG--SVVP--YDAQITIKYIGHFEYRDEPFDSS-FARGG--AETFRLNQ-  
 KVMKYVKQKGVG--VIIP--NNAQAIVHYIGYFEYRDEPFDST-YAIGK--PRSLRLGQ-  
 KVMKLIKQKGVG--SVVP--YDAQITIKYIGHFEYRDEPFDSS-FARGG--AETFRLNQ-  
 TVMKYVKQKGVG--EVVP--ANGQITFHYIGYFEDRDEPFDST-YSSGK--PRTLRLGQ-  
 YIYKKITQPGVAE-AGEVPL-NARVCIRYNAYWESEGAPFDSS-FLRGS--SYHFYTGRN  
 GVFKKILKEGDG--PTPQPG--EVVVHYTGTLKD-GTKFDSS-RDRNA--PFKFVIGE-  
 GVKKRVLREGQG--ETPASA--LVKVDYNAYIEFEPTPFDDSTYARR-K--SLKFVNN-  
 KIKKLILKNGIG--ETVA--KDSQIVIKYSGYLEGQDNPFDDST-YQRHC--ADRYRLNR-  
 NIMKLIKQNGIG--EIIP--HDAQSVIKYIGHFEYRDEPFDSS-FTRGG--VETFCINV-  
 KVKKLIRQKGVG--PVIP--PDALVTIKYSGYFEGEDEPYDSS-HARGN--PDRYQLND-  
 NMWKKITKVGDES-EGVPPVNNARACIRYNAYWEGEGTPFDST-FLRGS--SYFYTGGRN  
 KVMKFIKQNGVG--EIIP--QDAQSVHYLGNLEYRDEPFDST-YSSGK--PRTLRLNQ-  
 YIWKKITKTGNEE-ESVPAVNARACIRYNAYWEGEGAPFDSS-FLRGS--SHSFYTGRN  
 KVMKFIKQNGVG--EIIP--QDAQSVHYLGNLEYRDEPFDST-YSSGK--PRTLRLNQ-  
 KVKKRILRKGYG--DTLPDL--QVTIHYNAYIEFQDEPFDSTYARK-R--PYTFRLNN-  
 --MKFVKQKGVG--EVIP--SNAHATVHYIGYFEYRDEPFDST-YSCGK--PRSLRLGQ-  
 FMHKRTTREGHVD-RDVVPD-KARVSVRYSFYWEGMGAPFDSS-MLRGT--KFEFETGQK  
 KVMKLIKQKGVG--SIVP--YDAQITIKYIGHFEYRDEPFDSS-FARGG--AETFRLNQ-  
 SLRKKIIRHG-T--DKVPSYA--AVYIHYNSYLEEEVPPFDSSFLRSEK--PVRFQLGA-  
 HIYKKITRPLAE-NGEVPL-NARVCIRYNAYWEGEGAPFDSS-FLRGS--SYQFYTGGRN  
 GVLKKILRPGVG--PVVSRTA--TLRFHDNAYREFGDEPYDSS-RFRGK--PESARLG--  
 HIYKRITRTGHVD-RDAVPI-KARVSVRYSFYWEGESAPFDSS-LLRGT--KFEFETGQG  
 KVMKYVKKNGVE--ESVSNANPQLTFHYVAYYEHGDTPFDDST-YAAGR--PRCLRLN--  
 FMYKRVTRREGHVD-RDLVPD-KARVSVRYSFYWEGMGAPFDSS-MLRGT--KFEFETGQK  
 KIMKLIKQKGVG--STVP--YDAQITIKYIGHFEYRDEPFDSS-FARGG--AETFRLNQ-  
 KIMKLIKQKGVG--ATVS--YNSQVTIKYISYFEYSDEPFDST-FAQK--PKTLRLDH-  
 KVMKYVKQKGVG--EVVP--QNAQVTVNYIGYFEYRDEPFDST-YSYGR--PRSMRLGQ-  
 KVVKTILLEGSG--ETPAVGC--QVKVHYTGTLTD-GKKFDSS-IDRGT--PFEFALGQ-  
 HIYKKITQPLAE-SGEVPL-NARVCIRYNAYWEGEGAPFDSS-FLRGS--SYQFYTGGRN  
 KIKKLVLQKGIG--EIIP--ADSQVTIKYSGYLEGQDNPFDDST-YQRHS--VNRCLRLNQ-  
 KVMKFVKQKGVG--EVIP--KNAQVTVHYVGYFEYRDEPFDST-YSSGR--PRTLRLGQ-  
 ---MVVNNGTG--PVVPNGY--RIQVHYNSYLEYSDEPMDST-RLRSE--TKKFILGN-  
 NIFKRITREGHVD-RGLVPD-KARVAVRYSFYWEGENSPFDSS-LMRRS--KFYFETGAG  
 HIYKRITREGHVD-RDLVPE-KARVSIRYSFYWEGEGHPFDSS-MLRGT--KFEFETGQK  
 KVLKILLEPGIG--QVVPENY--VVLHYIAYISNLQEPFDVTYLQGRK--PKRFTLGN-  
 HIYKRIIREGHVE-RDMVPD-KARVTVRYSFYWEGEGAPFDSS-MLRGT--KFEFETGQR  
 KVLKILLNSGIG--QVVPENY--VVLHYIAYISNLQEPFDVTYLQGRK--PKRFTLGN-  
 GVFKKILKEGDG--PTPQPG--EVVVHYTGTLTD-GTKFDSS-RDRDS--PFKFIIIGE-  
 YIYKKITQPLAE-NGEVPL-NARVCIRYNAYWEGEGAPFDSS-FLRGS--SYHFYTGRN  
 KVLKILLNQGIG--QVVPDNY--VVLHYIAYISNLQEPFDVTYLQGRK--PKRFTLGN-  
 GVFKETKHPGYG--PGITENS--VVEVHYAGFFEYRDEPFDSS-RLRDE--TFKYRVGS-  
 KIMKLLKQKGVG--EIIP--SNAQVTIKYMGHFEYNDEPFDSS-FTRGG--AETFLLGQ-  
 GVKKKIIEGTGD-FPPA-GS--KVTVHYDGYLYPSGDEFDSS-RKRHS--PFTFNLK-  
 YIYKRVIREGHPE-REVPPE-RARVAVRYSFYWEGEGAPFDSS-MLRGT--QFEFVTGQC  
 GVLKQMKKPGFG--KTVPEKA--LVQIHYNAYSEVGQPPYDSTRMRG-E--PMKLRLGQ-  
 GVLKQMKKPGFG--KTVPEKA--LVQIHYNAYSEVGQPPYDSTRMRG-E--PMKLRLGQ-  
 YIYKRITREGHVE-RDLVPE-KARVSIRYSFYWEGDSHPFDSS-MLRGT--KFEFETGQK  
 GVFKKILKEGDG--PQPQPG--EVVVHYTGTLTD-GTKFDSS-RDRDS--PFKFIIIGE-  
 FIYKRITREGHVD-RDLVPQ-KARVSVRYSFYWEGEGAPFDSS-MLRGA--KFEFETGQN  
 GVFKKILKEGDG--PQPQPG--EVVVHYTGTLTD-GTKFDSS-RDRDS--PFKFIIIGE-

XP\_017001929 YMYKRITREGHVE-REVVPE-KARVSVRYSFYWEGSGAPFDSS-MLRGT--KFEFETGQK  
XP\_009012598 GIKKLLIKRG TG--PIVPPTS--NVTIMYSAYTEYSDVPFD----FTRR--PMHMDIG--  
XP\_008888049 GVFKKILKEGDG--PQPQPG--EVVVHYTGTLDD-GTKFDSS-RDRDS--PFKFIIGE-  
XP\_023297605 HVVKKITKVGLEQ-EPVVPN-NARVCIRYNAYWEGEGAPFDSS-FLRGS--SYSFYTGRN  
XP\_002594856 GVVKKVVVKQGVG--DVVPAGA--YVRVHYNGYLEYSEPFDDSS-RLRNE--ELRFRLAT-  
XP\_018896035 GVMKRIIKEGSG--EVVPPNS--HIKIHYQAYTEYQEVFPDVSILRSK--PLSFKLG--  
XP\_004517316 HIYKKITQPLPE-EGEVPL-NARVCIRYNAYWEGEGAPFDSS-FLRGS--SYHFYTGRN  
XP\_017148191 NIFKRITREGHQ-GLVLPD-KARVAVRYSYGYWEGESSPFDSS-LMRRT--KLYFETGAG  
XP\_002412109 GVLKKVLHPGVG--AVVPSDS--CVTFHYSAYLEMSDEPFDDST-RMRNR--PHRSLLC--  
XP\_014507068 GLKKKLLKEGEGW-DRPNNGD--QVEVHYTGTLDD-GTQFDSS-RDTGT--PFKFNLGQ-  
XP\_011298074 KIKKIIRQKGVG--SVIP--PDCLVTIKYAGYFDGQDEPYDSS-HARGK--PDRYQLGV-  
ESS30489 GVFKKILKEGDG--PQPQPG--EVVVHYTGTLDD-GTKFDSS-RDRDS--PFKFIIGE-  
EPR59296 GVFKKILKEGDG--PQPQPG--EVVVHYTGTLDD-GTKFDSS-RDRDS--PFKFIIGE-  
OAJ38225 HVCKKLLSEGSGD-LIDRPGT--TMRVHYTGSLYPSGEVFDSS-LDRDE--PIQIRLGQ-  
XP\_018637740 GVFKKILKEGDG--PQPQPG--EVVVHYTGTLDD-GTKFDSS-RDRDS--PFKFIIGE-  
KYK63140 GVFKKILKEGDG--PQPQPG--EVVVHYTGTLDD-GTKFDSS-RDRDS--PFKFIIGE-  
CEL73032 GVFKKILKEGDG--PQPQPG--EVVVHYTGTLDD-GTKFDSS-RDRDS--PFKFIIGE-  
AAX51680 GVFKKILKEGDG--PQPQPG--EVVVHYTGTLDD-GTKFDSS-RDRDS--PFKFIIGE-  
AFJ24780 LIFKRLISKGEG--SKIPIGS--LVIYNYKFYHEDQIEPFDST-RFKRH--PDRQRVGV-  
NP\_611837 NIYKRITRTGHVD-REAVPN-KARVSVRYSYGYWEGETAPFDSS-LLRGS--KFVFETGQG  
XP\_012342118 KIMKLIKQKGVG--STVP--YDAQITIKYIGHFEYRDEPFDSS-FARGG--AETFRNLQ-  
XP\_002082854 NIYKRITRTGHVD-REAVPN-KARVSVRYSYGYWEGETAPFDSS-LLRGT--KFEFETGQG  
XP\_002040150 NIYKRITRTGHVD-REAVPN-KARVSVRYSYGYWEGETAPFDSS-LLRGT--KFEFETGQG  
XP\_021954336 GIKKQVMKEGSE-TELIPPEG--YIWMHYITFVEGNEEPIDST-GSREL--LGSHKLGK-  
XP\_001357527 NIFKRITREGHQ-GLVLPD-KARVAVRYSYGYWEGESSPFDSS-LMRN--KFYFETGAG  
XP\_002015409 NIFKRITREGHQ-GLVLPD-KARVAVRYSYGYWEGESSPFDSS-LMRN--KFYFETGAG  
XP\_017469679 HIYKKITQPLTE-YGEVPL-NARVCIRYNAYWEGEGAPFDSS-FLRGS--SYHFYTGRN  
XP\_020810045 DIYKRIIRQGHAE-RDPVPD-KARVSIRYSYGYWEGVGAPFDSS-LLRGT--KFEFETGTK

NP\_003593 DITLWGMELGLLSMRRGELARFLFKPNYAYGTLCGPPLIPPNTTVLFEIELLDF  
XP\_003815624 DITLWGMELGLLSMRRGELARFLFKPNYAYGTLCGPPLIPPNTTVLFEIELLDF  
XP\_003777068 DITLWGMELGLLSMRRGELARFLFKPNYAYGTLCGPPLIPPNTTVLFEIELLDF  
XP\_003276647 DITLWGMELGLLSMRRGELARFLFKPNYAYGTLCGPPLIPPNTTVLFEIELLDF  
XP\_003895916 DITLWGMELGLLSMRRGELARFLFKPNYAYGTLCGPPLIPPNTTVLFEIELLDF  
EHH17242 DITLWGMELGLLSMRRGELARFLFKPNYAYGTLCGPPLIPPNTTVLFEIELLDF  
XP\_001110932 DITLWGMELGLLSMRRGELARFLFKPNYAYGTLCGPPLIPPNTTVLFEIELLDF  
XP\_011785750 DITLWGMELGLLSMRRGELARFLFKPNYAYGTLCGPPLIPPNTTVLFEIELLDF  
NP\_001128683 DITLWGMELGLLSMRRGELARFLFKPNYAYGTLCGPPLIPPNTTVLFEIELLDF  
XP\_017713171 DITLWGMELGLLSMRRGELARFLFKPNYAYGTLCGPPLIPPNTTVLFEIELLDF  
XP\_010385752 DITLWGMELGLLSMRRGELARFLFKPNYAYGTLCGPPLIPPNTTVLFEIELLDF  
XP\_002817917 DITLWGMELGLLSMRRGELARFLFKPNYAYGTLCGPPLIPPNTTVLFEIELLDF  
XP\_004045599 DITLWGMELGLLSMRRGELARFLFKPNYAYGTLCGPPLIPPNTTVLFEIELLDF  
XP\_008979905 DITLWGMELGLLSMRRGELARFLFKPTYAYGTLCGPPLIPPDNTTVLFEIELLDF  
XP\_016868230 DITLWGMELGLLSMRRGELARFLFKPNYAYGTLCGPPLIPPNTTVLFEIELLDF  
XP\_003794239 DITLWGMELGLLSMRRGELARFLFKPTYAYGTLCGPPLIPPNTTVLFEIELLDF  
XP\_012597698 DITLWGMELGLLSMRRGELARFLFRPNYAYGTLCGPPLIPPNTTVLFEIELLDF  
XP\_011931834 DITLWGMELGLLSMRRGELARFLFKPNYAYGTLCGPPLIPPNTTVLFEIELLDF  
XP\_003895917 DITLWGMELGLLSMRRGELARFLFKPNYAYGTLCGPPLIPPNTTVLFEIELLDF  
XP\_008016547 DITLWGMELGLLSMRRGELARFLFKPNXAYGTLCGPPLIPPNTTVLFEIELLDF  
XP\_003934167 DITLWGMELGLLSMRRGELARFLFKPTYAYGTLCGPPLIPPDNTTVLFEIELLDF  
XP\_012495716 DITLWGMELGLLSMRRGELARFLFKPNYAYGTLCGPPLIPPNTTVLFEIELLDF  
XP\_012304459 DITLWGMELGLLSMRRGELARFLFKPTYAYGTLCGPPLIPPDNTTVLFEIELLDF  
XP\_022357643 DITLWGMELGLLSMRRGELARFLFKPTYAYGALGCPPLIPPNTTVLFEIELLDF  
XP\_010385754 DITLWGMELGLLSMRRGELARFLFKPNYAYGTLCGPPLIPPNTTVLFEIELLDF  
XP\_017895560 DITLWGMELGLLSMRRGELARFLFKPTYAYGTLCGPPLIPPNTTVLFEIELLDF  
XP\_005892900 DITLWGMELGLLSMRRGELARFLFKPTYAYGTLCGPPLIPPNTTVLFEIELLDF  
XP\_010852603 DITLWGMELGLLSMRRGELARFLFKPTYAYGTLCGPPLIPPNTTVLFEIELLDF

|              |                                                         |
|--------------|---------------------------------------------------------|
| XP_546928    | DITLWGMELGLLSMRRGELARFLFKPTYAYGTLGCPPLIPPNTTVLFEIELLDF  |
| XP_005225237 | DITLWGMELGLLSMRRGELARFLFKPTYAYGTLGCPPLIPPNTTVLFEIELLDF  |
| XP_021556246 | DITLWGMELGLLSMRRGELARFLFKPTYAYGTLGCPPLIPPNTTVLFEIELLDF  |
| XP_011978492 | DITLWGMELGLLSMRRGELARFLFKPTYAYGTLGCPPLIPPNTTVLFEIELLDF  |
| NP_001296390 | DITLWGMELGLLSMRRGELARFLFKPTYAYGTLGCPPLIPPNTTVLFEIELLDF  |
| XP_011959859 | DITLWGMELGLLSMRRGELARFLFKPTYAYGTLGCPPLIPPNTTVLFEIELLDF  |
| XP_006942097 | DITLWGMELGLLSMRRGELARFLFKPAYAYGTLGCPPLIPPNTTVLFEIELLDF  |
| XP_007100028 | DITLWGMELGLLSMRRGELARFLFKPTYAYGMLGCPPLIPPNSTVLFEIELLDF  |
| XP_005972253 | DITLWGMELGLLSMRRGELARFLFKPTYAYGTLGCPPLIPPNTATVLFEIELLDF |
| XP_019277206 | DITLWGMELGLLSMRRGELARFLFKPAYAYGTLGCPPLIPPNTTVLFEIELLDF  |
| XP_014705926 | DITLWGMELGLLSMRRGELARFLFKPTYAYGTLGCPPLIPPNTTVLFEIELLDF  |
| XP_008540619 | DITLWGMELGLLSMRRGELARFLFKPTYAYGTLGCPPLIPPNTTVLFEIELLDF  |
| XP_020752493 | DITLWGMELGLLSMRRGELARFLFKPTYAYGTLGCPPLIPPNTTVLFEIELLDF  |
| XP_014988800 | DITLWGMELGLLSMRRGELARFLFKPNYAYGTLGCPPLIPPNTTVLFEIELLDF  |
| XP_011785755 | DITLWGMELGLLSMRRGELARFLFKPNYAYGTLGCPPLIPPNTTVLFEIELLDF  |
| XP_022444356 | DITLWGMELGLLSMRRGEVARFLFKPTYAYGMLGCPPLIPPNTTVLFEIELLDF  |
| XP_008979887 | DITLWGMELGLLSMRRGELARFLFKPTYAYGTLGCPPLIPPDTTVLFEIELLDF  |
| XP_004399150 | DITLWGMELGLLSMRRGELARFLFTPPYAYGTLGCPPLIPPNTTVLFEIELLDF  |
| XP_004268847 | DITLWGMELGLLSMRRGEVARFLFKPTYAYGMLGCPPLIPPNTATVLFEIELLDF |
| XP_019659608 | DITLWGMELGLLSMRRGELARFLFKPTYAYGTLGCPPLIPPNTTVLFEIELLDF  |
| XP_024602986 | DITLWGMELGLLSMRRGEVARFLFKPTYAYGMLGCPPLIPPNTTVLFEIELLDF  |
| XP_007186614 | DITLWGMELGLLSMRRGELARFLFKPTYAYGMLGCPPLIPPNTTVLFEIELLDF  |
| XP_014652016 | DITLWGMELGLLSMRRGELARFLFKPTYAYGTLGCPPLIPPNTTVLFEIELLDF  |
| XP_012597701 | DITLWGMELGLLSMRRGELARFLFRPNYAYGTLGCPPLIPPNTATVLFEIELLDF |
| XP_004761711 | DITLWGMELGLLSMRRGELARFLFKPTYAYGTMGCPPLIPPNTTVLFEIELLDF  |
| XP_004317177 | DITLWGMELGLLSMRRGEVARFLFKPTYAYGMLGCPPLIPPNTATVLFEIELLDF |
| XP_005892901 | DITLWGMELGLLSMRRGELARFLFKPTYAYGTLGCPPLIPPNTTVLFEIELLDF  |
| XP_017895559 | DITLWGMELGLLSMRRGELARFLFKPTYAYGTLGCPPLIPPNTTVLFEIELLDF  |
| XP_005662030 | DITLWGMELGLLSMRRGELARFLFKPTYAYGTLGCPPLIPPNTTVLFEIELLDF  |
| XP_010852604 | DITLWGMELGLLSMRRGELARFLFKPTYAYGTLGCPPLIPPNTTVLFEIELLDF  |
| XP_010852602 | DITLWGMELGLLSMRRGELARFLFKPTYAYGTLGCPPLIPPNTTVLFEIELLDF  |
| EPY83956     | DITLWGMELGLLSMRRGELARFLFTPTYAYGTLGCPPLIPPNTTVLFEIELLDF  |
| NP_001095679 | DITLWGMELGLLSMRRGELARFLFKPTYAYGTLGCPPLIPPNTTVLFEIELLDF  |
| XP_008139950 | DITLYGMELGLLTMRRGELARFLFKPPYAYGTLGCPPLIPPNSTVLFEIELIDF  |
| XP_010970644 | DITLWGMELGLLSMRKGEARFLFTPTYAYGTLGCPPLIPPNTTVLFEIELLDF   |
| XP_004021020 | DITLWGMELGLLSMRRGELARFLFKPTYAYGTLGCPPLIPPNTTVLFEIELLDF  |
| XP_015450070 | DITLWGMELGLLSMRRGELARFLFKPTYAYGTLGCPPLIPPNTTVLFEIELLDF  |
| XP_017516100 | DITLWGMELGLLSMQRGELARFLFKPSYAYGTLGCPPLIPANTTVLFEIELLDF  |
| XP_010342933 | DITLWGMELGLLSMRRGELARFLFKPTYAYGTLGCPPLIPPDTTVLFEIELLDF  |
| XP_006057167 | DITLWGMELGLLSMRRGELARFLFKPTYAYGMLGCPPLIPPNTTVLFEIELLDF  |
| XP_019843968 | DITLWGMELGLLSMRRGELARFLFKPTYAYGTLGCPPLIPPNTTVLFEIELLDF  |
| XP_006201442 | DITLWGMELGLLSMRKGEARFLFTPTYAYGTLGCPPLIPPNTTVLFEIELLDF   |
| XP_005972252 | DITLWGMELGLLSMRRGELARFLFKPTYAYGTLGCPPLIPPNTATVLFEIELLDF |
| XP_004380900 | DITLWGMELGLLSMRKGEARFLFKPTYAYGTLGCPPLIPPNTTVLFEIELLDF   |
| XP_007468850 | DITLWGMELGLLSMRRGELARFLFKPTYAYGMLGCPPLIPPNTTVLFEIELLDF  |
| XP_007100027 | DITLWGMELGLLSMRRGELARFLFKPTYAYGMLGCPPLIPPNSTVLFEIELLDF  |
| XP_008966786 | DITLWGMELGLLSMRRGELARFLFKPNYAYGTLGCPPLIPPNTTVLFEIELLDF  |
| XP_020017458 | DITLWGMELGLLSMRRGELARFLFKPTYAYGTLGCPPLIPPNSTILFEIELLDF  |
| XP_006088351 | DITLWGMELGLLTMRRGELARFLFKPPYAYGTLGCPPLIPPNSTVLFEIELIDF  |
| XP_020752496 | DITLWGMELGLLSMRRGELARFLFKPTYAYGTLGCPPLIPPNTTVLFEIELLDF  |
| XP_022444355 | DITLWGMELGLLSMRRGEVARFLFKPTYAYGMLGCPPLIPPNTTVLFEIELLDF  |
| XP_006773483 | DITLWGMELGLLTMRRGELARFLFKPPYAYGTLGCPPLIPPNSTVLFEIELIDF  |
| XP_012304461 | DITLWGMELGLLSMRRGELARFLFKPTYAYGTLGCPPLIPPDTTVLFEIELLDF  |
| XP_008591583 | DITLRGMELGLLSMRRGELARFLFRPSYAYGALGCPPLFPNTTVLFEIELLDF   |
| XP_016054558 | DITLWGMELGLLSMRRGELARFLFKPTYAYGTLGCPPLIPPKATVLFEIELIDF  |
| XP_011369980 | DITLWGMELGLLSMRRGELARFLFKPTYAYGTLGCPPLIPPNTTVLFEIELLDF  |
| XP_004268849 | DITLWGMELGLLSMRRGEVARFLFKPTYAYGMLGCPPLIPPNTATVLFEIELLDF |
| XP_024602987 | DITLWGMELGLLSMRRGEVARFLFKPTYAYGMLGCPPLIPPNTTVLFEIELLDF  |

|              |                                                         |
|--------------|---------------------------------------------------------|
| XP_019610492 | DITLWGMEGLLLSMRRGEVARFLFKPTYAYGKLGCPPLIPPNTTVLFEIELLDF  |
| XP_004317179 | DITLWGMEGLLLSMRRGEVARFLFKPTYAYGMLGCPPLIPP NATVLFEIELLDF |
| XP_006889852 | DITLWGMEGLLLSMRKGEARFLFKPSYAYGTLGCPPMIPP NSTVLFEIELLDF  |
| XP_007940604 | DITLWGMEGLLLSMRRGELARFLFRPAYAYGTLGCPPLIPP NSTVLFEIELLDF |
| XP_014411577 | DITLWGMEGLLLSMRKGEARFLFTPTYAYGTLGCPPLIPP NTTVLFEIELLDF  |
| XP_007073943 | DITLWGMEGLLLSMRRGELARFLFKPAYAYGTLGCPPLIPP NTTVLFEIELLDF |
| XP_006155025 | DITLWGMEGLLLTMRRGELARFLFKPPYAYGTLGCPPLIPP NTTVLFEIELLDF |
| XP_005328656 | DITLWGMEGLLLSMRRGELARFLFKPTYAYGTLGCPPLIPP NTTVLFEIELLDF |
| XP_011765609 | DITLWGMEGLLLSMRRGELARFLFKPNYAYGTLGCPPLIPP NTTVLFEIELLDF |
| XP_010979058 | DITLWGMEGLLLSMRKGEARFLFTPTYAYGTLGCPPLIPP NTTVLFEIELLDF  |
| XP_006249193 | DITLWGMEGLLLSMRRGELARFLFKPTYAYGTLGCPPLIPP NATVLFEIELIDF |
| XP_002722023 | DITLWGMEGLLLSMRRGELARFLFTPTYAYGALGCPPLIPP NTTVLFEIELLDF |
| XP_005344683 | DITLWGMEGLLLSMRRGELARFLFKPTYAYGTLGCPPLIPP NATVLFEIELIDF |
| XP_020941978 | DITLWGMEGLLLSMRRGELARFLFKPTYAYGTLGCPPLIPP NTTVLFEIELLDF |
| XP_006859898 | DITLWGMEGLLLTMRRGELARFLFKPTYAYGMLGCPPLIPP NTTVLFEIELLDF |
| XP_005549416 | DITLWGMEGLLLSMRRGELARFLFKPNYAYGTLGCPPLIPP NTTVLFEIELLDF |
| XP_024427494 | DITLWGMEGLILSMRRGELARFLFKPTYAYGTLGCPPLIPP NSTVLFEIELLDF |
| XP_016001971 | DITLWGMEGLLLSMRRGELARFLFKPTYAYGTLGCPPLIPR DATVLFEIELLDF |
| XP_007468849 | DITLWGMEGLLLSMRRGELARFLFKPTYAYGMLGCPPLIPP NTTVLFEIELLDF |
| XP_014988802 | DITLWGMEGLLLSMRRGELARFLFKPNYAYGTLGCPPLIPP NTTVLFEIELLDF |
| XP_012584338 | DITLWGMEGLLLSMRKGEARFLFTPTYAYGTLGCPPLIPP NTTVLFEIELLDF  |
| XP_006971358 | DITLWGMEGLLLSMRRGELARFLFKPTYAYGTLGCPPLIPP NATVLFEIELIDF |
| XP_004620930 | DITLWGMEGLLLTMRRGELARFLFTPTYAYGALGCPPLIPP NTTVLFEIELLDF |
| XP_008696858 | DITLWGMEGLLLSMRRGELARFLFKPTYAYGTLGCPPLIPP NTTVLFEIELLDF |
| XP_021018812 | DITLWGMEGLLLSMRRGELARFLFKPAYAYGTLGCPPLIPP NATVLFEIELIDF |
| XP_012782940 | DITLWGMEGLLLSMRRGELARFLFTPNYAYGALGCPPLIPP NSTVLFEIELLDF |
| XP_019502388 | DITLWGMEGLLLSMRRGELARFLFKPAYAYGKLGCPPLIPP NTTVLFEIELLDF |
| XP_021042681 | DITLWGMEGLLLSMRRGELARFLFKPAYAYGTLGCPPLIPP NATVLFEIELIDF |
| NP_001264821 | DITLWGMEGLLLSMRKGEARFLFKPAYAYGTLGCPPLIPP NATVLFEIELIDF  |
| XP_021519217 | DITLWGMEGLLLSMRRGELARFLFKPTYAYGTLGCPPLIPP NATVLFEIELIDF |
| XP_005344682 | DITLWGMEGLLLSMRRGELARFLFKPTYAYGTLGCPPLIPP NATVLFEIELIDF |
| NP_001349718 | DITLWGMEGLLLSMRRGELARFLFKPNYAYGTLGCPPLIPP NTTVLFEIELLDF |
| NP_001099392 | DITLWGMEGLLLSMRRGELARFLFKPTYAYGTLGCPPLIPP NATVLFEIELIDF |
| XP_005396843 | DITLWGMEGLLLSMRKGEARFLFKPTYAYGALGCPPLIPP NATVLFEIELLDF  |
| XP_019502390 | DITLWGMEGLLLSMRRGELARFLFKPAYAYGKLGCPPLIPP NTTVLFEIELLDF |
| XP_006971357 | DITLWGMEGLLLSMRRGELARFLFKPTYAYGTLGCPPLIPP NATVLFEIELIDF |
| XP_008966787 | DITLWGMEGLLLSMRRGELARFLFKPNYAYGTLGCPPLIPP NTTVLFEIELLDF |
| XP_003500991 | DITLWGMEGLLLSMRRGELARFLFKPTYAYGTLGCPPLIPP NATVLFEIELIDF |
| XP_008846596 | DITLWGMEGLLLSMRKGEARFLFRPTYAYGTLGCPPLIPP NATVLFEIELLDF  |
| XP_021563404 | DITLWGMEGLLLSMRRGELARFLFKPTYAYGALGCPPRIPP NATVLFEIELLDF |
| XP_018887307 | DITLWGMEGLLLSMRRGELARFLFKPNYAYGTLGCPPLIPP NTTVLFEIELLDF |
| XP_021018806 | DITLWGMEGLLLSMRRGELARFLFKPAYAYGTLGCPPLIPP NATVLFEIELIDF |
| XP_017176678 | DITLWGMEGLLLSMRKGEARFLFKPAYAYGTLGCPPLIPP NATVLFEIELIDF  |
| NP_291049    | DITLWGMEGLLLSMRKGEARFLFKPAYAYGTLGCPPLIPP NATVLFEIELIDF  |
| XP_021042679 | DITLWGMEGLLLSMRRGELARFLFKPAYAYGTLGCPPLIPP NATVLFEIELIDF |
| XP_010617304 | DITLWGMEGLLLSMRKGEARFLFKPPYAYGALGCPPLIPP NATVLFEIELLDF  |
| XP_021519216 | DITLWGMEGLLLSMRRGELARFLFKPTYAYGTLGCPPLIPP NATVLFEIELIDF |
| XP_023420891 | DITLWGMEGLLLTMRKGEARFLFKPTYAYGALGCPPLIPP NATVLFEIELLDF  |
| XP_006155027 | DITLWGMEGLLLTMRRGELARFLFKPPYAYGTLGCPPLIPP NTTVLFEIELLDF |
| XP_011765605 | DITLWGMEGLLLSMRRGELARFLFKPNYAYGTLGCPPLIPP NTTVLFEIELLDF |
| XP_015302699 | DITLWGMEGLLLSMRRGELARFLFKPNYAYGTLGCPPLIPP NTTVLFEIELLDF |
| XP_011765611 | DITLWGMEGLLLSMRRGELARFLFKPNYAYGTLGCPPLIPP NTTVLFEIELLDF |
| XP_012597702 | DITLWGMEGLLLSMRRGELARFLFRPNYAYGTLGCPPLIPP NATVLFEIELLDF |
| XP_014988803 | DITLWGMEGLLLSMRRGELARFLFKPNYAYGTLGCPPLIPP NTTVLFEIELLDF |
| XP_010617307 | DITLWGMEGLLLSMRKGEARFLFKPPYAYGALGCPPLIPP NATVLFEIELLDF  |
| XP_004666244 | DITLWGMEGLLLSMRKGEARFLFKPTYAYGALGCPPLIPPSATVLFEIELLDF   |
| XP_004630630 | DITLWGMEGLLLSMRRGELARFLFKPTYAYGALGCPPLIPP NATVLFEIELLDF |
| XP_004840130 | DITLWGMEGLLLSMRKGEARFLFKPTYAYGALGCPPLIPP NATVLFEIELLDF  |

|              |                                                        |
|--------------|--------------------------------------------------------|
| XP_014403986 | DITLWGMELGLLTMRRGELARFLFKPPYAYGTLGCPPLIPPNSTVLFEIELIDF |
| XP_016800790 | DITLWGMELGLLSMRRGELARFLFKPNYAYGTLGCPPLIPPNTTVLFEIELLDF |
| XP_014988804 | DITLWGMELGLLSMRRGELARFLFKPNYAYGTLGCPPLIPPNTTVLFEIELLDF |
| ELK06863     | DITLWGMELGLLSMRRGELARFLFKPTYAYGTLGCPPLIPPNTTVLFEIELLDF |
| EHB08283     | DITLWGMELGLLSMRKGELARFLFKPTYAYGALGCPPLIPPNTVLFEIELLDF  |
| XP_004706046 | DITLWGMELGLLTMRRGELARFLFKPTYAYGVLGCPPLIPPNTTVLFEIELLDF |
| XP_021110082 | DITLWGMELGLLSMRKGELARFLFKPTYAYGALGCPPLIPPNTVLFEIELLDF  |
| XP_007518064 | DITLWGMELGLLSMRRGELARFLSPRYAYGALGCPPLIPPEATVLFEIELLDF  |
| PN192595     | DITLWGMELGLLSMRRGELARFLFKPNYAYGTLGCPPLIPPNTTVLFEIELLDF |
| XP_020861399 | EITLWGMENVLLTMRKGELARFLFKPRYAYGALGCPPLIPPNTTVLFEIELLDF |
| XP_016284889 | EITLWGMENVLLTMRKGELARFLFKPRYAYGALGCPPLIPPNTTVLFEIELLDF |
| XP_016284888 | EITLWGMENVLLTMRKGELARFLFKPRYAYGALGCPPLIPPNTTVLFEIELLDF |
| XP_001519210 | EITLGGMEVALLTMRKGELARFLFKPAYAYGRLGCPPLIPADATVLFEMELLDF |
| XP_020861404 | EITLWGMENVLLTMRKGELARFLFKPRYAYGALGCPPLIPPNTTVLFEIELLDF |
| XP_014425414 | DITLLGMEVGLLTMRKGELARFLFMPSYAYGALGCPPLIPPNTVLFEIELLDF  |
| XP_004761713 | DITLWGMELGLLSMRRGELARFLFKPTYAYGTMGCPPLIPPNTTVLFEIELLDF |
| XP_007441600 | DITLWGMENVLLTMRKGELARFLFKPNYAFGTLGCPPLIPPNSTVLFEEVLLDF |
| XP_016080873 | EITLGGMEVALLTMRKGELARFLFKPAYAYGRLGCPPLIPADATVLFEMELLDF |
| XP_024066689 | EITLQGMENVLLTMRKGESSRFLFTPSYAYGALGCPPLIPPNTVLFEIELLDF  |
| XP_019365238 | EITLWGMIEGLLTMRKGELARFLFMPRYAYGTLGCLPLIPPNTVLFEIELMDF  |
| XP_019401968 | EITLWGMIEGLLTMRKGELARFLFMPHYAYGTLGCPPLIPPNTVLFEIELMDF  |
| XP_013926437 | DITLRGLEVGLLTMRKGELARFLFKPNYAFGTLGCPPLIPPNSTVLFEEVLLDF |
| XP_019401969 | EITLWGMIEGLLTMRKGELARFLFMPHYAYGTLGCPPLIPPNTVLFEIELMDF  |
| XP_015269029 | EITLRGMIVGLLTMRKGELARFLFRSPYAFGMTGCPPLIPPNTVLFEIELLDF  |
| XP_014464913 | EITLWGMIEGLLTMRKGELARFLFMPHYAYGALGCLPLIPPNTVLFEIALLDF  |
| XP_006258869 | EITLWGMIEGLLTMRKGELARFLFMPHYAYGALGCLPLIPPNTVLFEIALLDF  |
| XP_005344684 | DITLWGMELGLLSMRRGELARFLFKPTYAYGTLGCPPLIPPNTVLFEIELIDF  |
| XP_015670323 | DITLRGMEVGLLTMRKGELARFLFQPNYAFGTLGCPPLIPPNTVLFEVLLDF   |
| XP_020662988 | DITLRGMEAGLLTMRKGELARYLFKPSYAFGALGCPPLIPPNTVMFEIELLDF  |
| XP_007065519 | EITLQGMENVLLTMRKGELARFLFTPSYAYGALGCPPLIPPNTVLFEIELLDF  |
| XP_020662989 | DITLRGMEAGLLTMRKGELARYLFKPSYAFGALGCPPLIPPNTVMFEIELLDF  |
| XP_020662990 | DITLRGMEAGLLTMRKGELARYLFKPSYAFGALGCPPLIPPNTVMFEIELLDF  |
| XP_025051231 | GITLWGMIEGLLTMRKGELARFLFMPHYAYGALGCLPLIPPNTVLFEIELLDF  |
| KYO33272     | EITLWGMIEGLLTMRKGELARFLFMPHYAYGALGCLPLIPPNTVLFEIALLDF  |
| XP_021018814 | DITLWGMELGLLSMRRGELARFLFKPAYAYGTLGCPPLIPPNTVLFEIELIDF  |
| OBS57796     | DITLWGMELGLLSMRRGELARFLFKPTYAYGTLGCPPLIPPNTVLFEIELIDF  |
| NP_001264822 | DITLWGMELGLLSMRKGELARFLFKPAYAYGTLGCPPLIPPNTVLFEIELIDF  |
| XP_021042683 | DITLWGMELGLLSMRRGELARFLFKPAYAYGTLGCPPLIPPNTVLFEIELIDF  |
| XP_021519218 | DITLWGMELGLLSMRRGELARFLFKPTYAYGTLGCPPLIPPNTVLFEIELIDF  |
| XP_024653358 | DITLWGMELGLLSMRRGELARFLFKPNYAYGTLGCPPLIPPNTTVLFEIELLDF |
| XP_009678488 | DITLGGLEIGLLTMRKGEMARFVFMNYAYGKLGCPPLIPNATVLFEEVLLDF   |
| XP_015302701 | DITLWGMELGLLSMRRGELARFLFKPNYAYGTLGCPPLIPPNTTVLFEIELLDF |
| XP_003770271 | EITLWGMENVLLTMRKGELARFLFKPRYAYGALGCPPLIPPNTTVLFEIELLDF |
| ETE73718     | DITLRGLEIGLLTMRKGELARFLFKPNYAFGTLGCPPLIPPNSTVLFEEVLLDF |
| NP_989052    | DITLSGMEIGLLTMQRGELSRLFLSPKYAYGTLGCSPLIPPSATVLFEIELLDF |
| NP_001085204 | DITLAGMEIGLLTMQRGELSRLFLSPKYAYGTLGCSPLIPPSATALFEIELLDF |
| XP_011592867 | DITLGGLEIGLLTMRKGEVARFVFTPDYAYGRQGCPLIPPNTVMFEVEVLLDF  |
| XP_010584273 | DITLWGLEIGLLTMRKGEVARFVFTPDYAYGRQGCPLIPPNTVMFEVEVLLDF  |
| XP_017946629 | DITLSGMEIGLLTMQRGELSRLFLSPKYAYGTLGCSPLIPPSATVLFEIELLDF |
| XP_008109385 | DITLRGMEGLLTMRKQEVARYLFKPNYAFGRMGCPPLIPPDATVMFEIELLDF  |
| XP_021271278 | DITLEGLEIGLLTMRKGEVARFIFTPNYAYGQQGCLPLIPPNTVLFEVELIDF  |
| XP_023074397 | DITLWGMELGLLSMRRGELARFLFKPNYAYGTLGCPPLIPPNTTVLFEIELLDF |
| XP_015151391 | DITLGGLEIGVLTMRKGEVARFIFSPSYAYGQQGCLPLIPPDATVLFEEVLLDF |
| XP_018100492 | DITLAGMEIGLLTMQRGELSRLFLSPKYAYGTLGCSPLIPPSATALFEIELLDF |
| POI24993     | DITLGGLEIGVLTMRKGEVARFIFSPSYAYGQQGCLPLIPPDATVLFEEVLLDF |
| PN192596     | DITLWGMELGLLSMRRGELARFLFKPNYAYGTLGCPPLIPPNTTVLFEIELLDF |
| XP_015736491 | DITLQGLEIGVLTMRKGEVARFIFAPSYAYGQQGCPPLIPPNTVLFEVELIDF  |
| XP_010283169 | DITLAGLEIGLLTMRKGEVSRFVFTPDYAYGRQGCPLIPPNTVMFEVEVLLDF  |

|              |                                                           |
|--------------|-----------------------------------------------------------|
| PNJ85879     | DITLWGMELGLLSMRRGELARFLFKPNYAYGTLGCPPLIPPNTTVLFEIELLDF    |
| XP_018412624 | DITLIGMEVSVLTMQRGELSRLFLYSPAYAYGALGCPPLIPASATVLFIEMLDF    |
| XP_010211497 | DITLWGLEVGLLTMRKGELARFVFAPDYAYGKLGCPPLIPP NATVLFEEVLLDF   |
| XP_017388864 | DITLWGMELGLLSMRRGELARFLFKPTYAYGTLGCPPLIPPDTTVLFEIELIDF    |
| XP_008109386 | DITLRGMELGLLTMKKQEVARYLFLKPNYAFGRMGCPPLIPPDATVMFEIELLDF   |
| XP_014342809 | DITLLGMEIGLHTMKKGEFSRFLFKPEYAYGEMGCPPLIPPHSTVLFEEVLQDF    |
| KFV84016     | DITLGGLEIGLLTMKKGEMARFVFM PNAYAYGKLGCPPLIPLNATVLFEEVLDLF  |
| XP_013812139 | DITLGGLEIGLLTMKKGELARFVFTPDYAYGKLGCPPLIPLNNAVVLFEVLLDF    |
| XP_009643249 | DITLGGLEIGLLTMKKGEVARFVFTPEYAYGRQGCPLVPPNATVMFEVEVLDF     |
| XP_009928379 | DITLWGLEIGLLTMKKGEVARFVFTPDYAYGRQGCPLIPP NATVMFEVEVLDF    |
| XP_010124464 | DITLRGLEIGILTMKKGEVARFVFM PNAYAYGQMGCPPLIPP NATVMFEVEVLDF |
| XP_009321903 | DITLGGLEIGLLTMKKGEVARFVFTPDYAYGRQGCPLIPP NATVVFEVEVLDF    |
| XP_009807780 | DITLGGLEIGLLTMKKGEVARFVFM PDYAYGRQGCPLIPP NATVMFEVEVLDF   |
| XP_009512874 | DITLGGLEIGLLTMKKGEAARFVFTPDYAYGRQGCPLIPP NATVMFEVELLDF    |
| XP_009586283 | DITLGGLEIGLLTMKKGEVARFVFTPDYAYGRQGCPLIPP NAMVLFEEVLDLF    |
| KFQ72829     | DITLAGLEIGLLTMKKGEVSRFVFTPDYAYGRQGCPLIPP NAMVMFEVEVLDF    |
| XP_009698973 | DITLGGLEIGLLTMKKGEAARFVFM PDYAYGRQGCPLIPP NAMVMFEVEVLDF   |
| XP_009901738 | DITLWGLEIGLLTMRKGEAARFIFKPCYAYGQQGCHPVIPP NATVTFEVELRDF   |
| XP_012887159 | DITLWGMELGLLSMRRGELARFLFKPTYAYGTLGCPPLIPP NSTVLFIEIELLDF  |
| XP_009940812 | DITLGGLEVGLLTMKKGEVARFVFTPAYAYGQQGCPPLIPP NATVMFEVELLDF   |
| XP_002187983 | DITLWGLEIGLLSMTKGEAAQFILAPKYAYGQLGCPPLIPP NTTVLFKVEVLDF   |
| XP_009887190 | DITLVGLEIGLLTMKKGEVARFVFRPDYAYGQQGCPPLIPP NATVMFEVEVLDF   |
| XP_009486380 | DITLGGLEIGLLTMKKGEVARFVFTPDYAYGRQGCPLIPP NATVMFEVEVLDF    |
| KGL76252     | DITLWGLEVGLLTMRKGELARFVFAPDYAYGKLGCPPLIPP NATVLFEEVLLDF   |
| XP_010306733 | DITLRGLVIGLLTMKKGEGAKFVFTPDYAYGRQGCPLIPP NATVMFEVEVLDF    |
| XP_008979919 | DITLWGMELGLLSMRRGELARFLFKPTYAYGTLGCPPLIPP DTTVLFEIELLDF   |
| XP_009998510 | DITLWGLEIGLLTMRKGEVARFFLMPKYAYGQLGCPPLIPP NSTVTFEVELLDF   |
| XP_009463122 | DITLGGLEIGLLTMKKGEVARFVFTPPYAYGRQGCPLIPP NATVMFEVEVLDF    |
| XP_007894626 | DITLVGMELGVRTMREGEFARLLKPEYAYGRLGCPPRIPP NATVLLLEMLGF     |
| XP_010022120 | DITLLGLEVGLLTMKKGELSRLFVFTPGYAYGQRGCPPLIPPSATVIFEVEVLDF   |
| XP_010083598 | DITLWGLEIGLLTMKVGEAARFFFLPGYAYGKMGCPPLIPP NATMFEVEVVDF    |
| XP_010194269 | EITLLGLKVGLLTMKKGEAIFAIFLPEYAYGSMGCPPLIPP NATVMFEVELLDF   |
| XP_009962683 | DITLQGLAVGLLTMKKGEAARFVFM PDYAYGQQGCPPLIPPSATVMFEVELLDF   |
| KFP29338     | EITLLGLKVGLLTMKKGEAIFAIFLPEYAYGSMGCPPLIPP NATVMFEVELLDF   |
| XP_010147897 | DITLWGLEIGLLTMKKGEVARFVFM PGYAYGRQGCPLIPP NATVLFEEVLDLF   |
| KFQ39479     | DITLGGLEIGLLTMKKGEVARFVFTPPYAYGQQGCPPLIPP NATVMFEVEVLDF   |
| EOB04024     | DITLRGLEIGLLTMKKGEVARFVFTPVYAYGQQGCPPLIPP NATVLFEEVMLDF   |
| XP_023675251 | DVTLPGLELGLLTMKKGEFSRFLFLAKYAYGEMGCPPLIPPSATVLYEVQVLDF    |
| XP_009557002 | DITLQGLEIGLLTMKKGEVAKFVFAPDYAYGQRGCPPLIPPSATVMFEVELLDF    |
| XP_008944700 | DITLLGLEISLLTMRKGEAARFVFS PKYAYGPQGCPLIPPEATVLFEEVLLDF    |
| KFP93140     | DITLWGLEIGLLTMKKGEVARFVFTPDYAYGRQGCPLIPP NATVMFEVEVLDF    |
| KFP44723     | DITLRGLEIGILTMKKGEVARFVFM PNAYAYGQMGCPPLIPP NATVMFEVEVLDF |
| XP_017553040 | DVTLCGLELGLLTMKRKGEFSRFLFQPDYAFGEMGCPPLIPPAATVLYEVQVLEF   |
| XP_021396070 | DITLWGLEIGLLSMTKGEAALFVLAPEYAYGQRGCPPIPSNTMVLFKVEVLDF     |
| XP_010143455 | DITLRGLEIGLLTMTKGEAARFVFTPDYAYGQRGCYPLIPC NATVVFEVEVLDF   |
| KFQ87275     | DITLGGLEIGLMTMKKGEVARFVFTPDYAYGRQGCPLIPP NATVMFEVEVLDF    |
| XP_010891852 | DVTLYGLELGILTMKKGEFSRFLFLPEYAYGDMGCPPLIPPFATVLYEVQVLDF    |
| XP_009863922 | DITLGGVEVGLLTMKKGEVARFYFSPEYAYGHQGCPLIPP NTSVVFDVEVLDF    |
| KFW66808     | DITLGGLEIGLLTMKKGEVARFVFTPDYAYGRQGCPLIPP NATVVFEVEVLDF    |
| XP_018591809 | DVTLPGLEVGLLTMKSGEFSRFLFLPKYAYGDMGCPPLIPPSATLLYEVHLLDF    |
| KFP21064     | DITLGGLEIGLLTMKKGEVARFVFTPEYAYGRQGCPLVPPNATVMFEVEVLDF     |
| KFZ64979     | DITLAGLEIGLLTMKKGEVARFIFMPDYAYGKQGCPLIPP NATVMFEVEVLDF    |
| KFW73903     | DITLGGLEIGLLTMKKGEAARFVFTPDYAYGRQGCPLIPP NATVMFEVELLDF    |
| KFM05579     | DITLGGLEIGLLTMKKGEVARFVFTPDYAYGRQGCPLIPP NATVMFEVEVLDF    |
| KFV69563     | DITLWGLEIGLLTMRKGEAARFIFKPCYAYGQQGCHPVIPP NATVTFEVELRDF   |
| XP_023823731 | DVTLCGLELGILTMKRKGEFSRFLFLPAYAYGEMGCPPLIPPVATVLYEVQVLDF   |
| XP_016346087 | DVTLYGLELGLLTMKKGEFSRFLFKPKYAYGDLGCPPHIPPLATVLYEVQVLDF    |
| KFV51798     | DITLGGLEIGLLTMKKGEVARFVFM PDYAYGRQGCPLIPP NATVMFEVEVLDF   |

|              |                                                          |
|--------------|----------------------------------------------------------|
| KFW03341     | DITLWGLEIGLLTMKKGEVARFVFMPGYAYGRQGCLPLIPP NATVLF EVEVLDF |
| KFV99355     | DITLGGLEIGLLTMKKGEVARFVFTPDYAYGRQGCPLIPP NAMVLF EVEVLDF  |
| OXB56102     | DITLLGLEIGLLTMKKGELARFIFTPNYAYGKQGCLPLIPKNATVLF IVELIDF  |
| XP_018958387 | DVTLYGLELGLLTMKKGEFSRFLFKPKYAYGDLGCPPHIPPLATVLYEVQVLDF   |
| XP_019903677 | DVTLYGLELGLLTMKKGEFSRFLFLPEYAYGDMGCPPLIPPFATVLYEVQVLDF   |
| KFU91562     | DITLWGLEIGLLTMRKGEVARFFLMPKYAYGQLGCPPLIPP NSTVTFEVELLDF  |
| XP_017314960 | DVTLWGLDISLRTMRGFEFSRFLFLPEYAYGDMGCPPLIPPGATVLYEVQVFDY   |
| XP_016393789 | DVTLYGLELGLLTMKKGEFSRFLFKPKYAYGDLGCPPHIPPLATVLYEVQVLDF   |
| XP_009093115 | DITLWGLEIGLLSMTKGEAALFVLTPPEYAYGQRCPPSIPPNTTVLFKVEVLDF   |
| XP_023869471 | DVTLGCGLELGLLTMRKGEFSRFLFLPEYAYGAMGCPPLIPPVATVLYEVQVLDF  |
| XP_019903679 | DVTLYGLELGLLTMKKGEFSRFLFLPEYAYGDMGCPPLIPPFATVLYEVQVLDF   |
| XP_019903678 | DVTLYGLELGLLTMKKGEFSRFLFLPEYAYGDMGCPPLIPPFATVLYEVQVLDF   |
| XP_014110391 | DITLGGLEIGLLSMTKGEAALFILTPPEYAYGQRCPPSIPPNTTVLFKVEVLDF   |
| XP_017314964 | DVTLWGLDISLRTMRGFEFSRFLFLPEYAYGDMGCPPLIPPGATVLYEVQVFDY   |
| XP_019903676 | DVTLYGLELGLLTMKKGEFSRFLFLPEYAYGDMGCPPLIPPFATVLYEVQVLDF   |
| XP_015502317 | DITLGGLEIGLLSMTKGEAALFILTPPEYAYGQRCPPSIPPNTTVLFKVEVLDF   |
| XP_020341240 | DVTLGCGLELGLLTMRKGEFSRFLFLPEYAYGAMGCPPLIPPVATVLYEVQVLDF  |
| NP_001122145 | DVTLYGLELGLLTMKKGEFSRFLFKPKYAYGDLGCPPHIPPCATVLYEVQVLDF   |
| OWK52486     | DITLWGLEIGLLSMTKGEAALFVLAPEYAYGQRCPPFIPSNMTVLFKVEVLDF    |
| XP_013992803 | DVTLGCGLELGLLTMRKGEYSRFLFLPEYAYGAMGCPPLIPPVATVLYEVQVLDF  |
| XP_024287707 | DVTLGCGLELGLLTMRKGEFSRFLFLPEYAYGAMGCPPLIPPVATVLYEVQVLDF  |
| AAH54673     | DVTLYGLELGLLTMKKGEFSRFLFKPKYAYGDLGCPPHIPPCATVLYEVQVLDF   |
| KFP60963     | DITLGGLEIGLLTMKKGEAARFVFMPDYAYGRQGCPLIPP NAMVMFEVEVLDF   |
| XP_018958370 | DVTLYGLELGLLTMKKGEFSRFLFKPKYAYGDLGCPPHIPPLATVLYEVQVLDF   |
| KGL96380     | DITLVGLEIGLLTMKKGEVARFVFRPDYAYGQGCPLIPP NATVMFEVEVLDF    |
| XP_016148031 | DVTLYGLELGLLTMKKGEFSRFLFKPKYAYGDLGCPPHIPPLATVLYEVQVLDF   |
| XP_007245276 | DMTLCGLELGLLTMRKGECSRFLFKHDYAFGEMGCPPLIPPLAMVLYEVQVLDF   |
| XP_023794776 | DITLGGLEIGLLSMTKGEAALFILTPKYAYGQRCPPSIPPNTTVLFKVEVLDF    |
| XP_021479427 | DVTLGCGLELGLLTMRKGEFSRFLFLPEYAYGAMGCPPLIPPVATVLYEVQVLDF  |
| KFR16943     | DITLGGLEVGLLTMKKGEVARFVFTPAYAYGQGCPLIPP NATVMFEVELLDF    |
| XP_009988051 | DITLRGLELGLLTMKKGEAARFVFVDPDYAYGRGCPPLIPP NATVTTFEVEVLDF |
| KFV16869     | DITLWGLEIGLLTMKVGEAARFFFLPGYAYGKMGCPPLIPP NAMATFVEVEVDF  |
| KFO13846     | DITLRGLVIGLLTMKKGEGAKFVFTPDYAYGRQGCPLIPP NATVMFEVEVLDF   |
| XP_020373313 | DITLLGMELAIQTMRKGEFARFLFKPQYAYGQMGCPPRIPANATVMFELEILHF   |
| XP_006640997 | EVTLVGLEVGLLTMRKGEFARFLFLPDYAYGAMGCPPLIPPAATVLFVHLLDF    |
| XP_020341239 | DVTLGCGLELGLLTMRKGEFSRFLFLPEYAYGAMGCPPLIPPVATVLYEVQVLDF  |
| KQK73326     | DITLLGLEVGLLTMKKGELSRLFVFPAYAYGQLGCPPLIPPSATVIFEVEVLDF   |
| XP_008500186 | DITLWGLEIGLLTMRKGERARFFFTPSYAYGAMGCPPLIPP NAMVMFEVELLDF  |
| XP_013992801 | DVTLGCGLELGLLTMRKGEYSRFLFLPEYAYGAMGCPPLIPPVATVLYEVQVLDF  |
| XP_016350445 | DVTLYGLELGLLTMKKGEFSRFLFMPKYAYGDLGCPPHIPPLAMVLYEVQVLDF   |
| KFV47875     | DITLQGLAVGLLTMKKGEAARFVFMPDYAYGQGCPLIPPSATVMFEVELLDF     |
| XP_022534491 | DMTLCGLELGLLTMRKGECSRFLFKHDYAFGEMGCPPLIPPLAMVLYEVQVLDF   |
| XP_021479426 | DVTLGCGLELGLLTMRKGEFSRFLFLPEYAYGAMGCPPLIPPVATVLYEVQVLDF  |
| KFQ96759     | DITLGGLEIGLLTMKKGEVARFVFTPYAYGRQGCPLIPP NATVMFEVEVLDF    |
| XP_012685286 | DVTLWGLEVGLLTMKKGELAHFLFKPKYAYGEMGCPPLIPSSATVFYEVHVIDF   |
| KFQ41466     | DITLLGLEVGLLTMKKGELSRLFVFTPGYAYGQRCPPSIPP SATVIFEVEVLDF  |
| XP_024997748 | DITLGGLEIGVLTMMKKGEVARFIFSPSYAYGQGCPLIPP DATVLF EVELIDF  |
| KFQ35533     | DITLLGLEISLLTMRKGEAARFVFSKYAYGPQGCPLIPPEATVLF EVELLDF    |
| XP_020459257 | DMTLVGLEQGLLTMQKGEFSRFLFQPLYAYGDIGCPPLIPAAA VVLYEVEILDF  |
| XP_017264554 | DVTLAGLELGLLTMKRGEFSRFLFQPYAYGDMGCPPIIPAAA VVLYEVQVLDY   |
| XP_005917667 | DVTLAGLELGLLTMKKGEFSRFLFQPYAYGEMGCPPIIPAAA VVLYEVQVLDY   |
| XP_022621130 | DVTLAGLELGLLTMQKGEFSRFLFQPHYAYGDMGCPPIIPAAA VVLYEVQVLDY  |
| XP_005725080 | DVTLAGLELGLLTMKKGEFSRFLFQPYAYGEMGCPPIIPAAA VVLYEVQVLDY   |
| XP_010408101 | DITLWGLEIGLLSMTKGETALFVLRPEYAYGQRCPPSIPPNTTVLFKVEVLDF    |
| KFO74526     | DITLQGLEIGLLTMKKGEVAKFVFAPDYAYGQRCPPSIPP SATVMFEVELLDF   |
| XP_005449739 | DVTLAGLEVGLLTMKKGEFSRFLFQPHYAYGDMGCPPIIPAAA VVLYEVQVLDY  |
| XP_023285908 | DVTLVGLELGLLTMQKGEFSRFLFQPHYAYGDMGCPPIIPAAA VVLYEVQVLDY  |
| XP_015502316 | DITLGGLEIGLLSMTKGEAALFILTPPEYAYGQRCPPSIPPNTTVLFKVEVLDF   |

|              |                                                         |
|--------------|---------------------------------------------------------|
| XP_004542108 | DVTLAGLELGLLTMKKGEFSRFLLPQYAYGEMGCPPFIPTAAVVLYEVQILDY   |
| XP_023823730 | DVTLGCGLELGILTMRKGEFSRFLFLPAYAYGEMGCPPLIPPVATVLYEVQVLDF |
| XP_020459258 | DMTLVGLEQGLLTMQKGEFSRFLFQPLYAYGDIGCPPLIPAAAVVLYEVEILDF  |
| XP_008634949 | DITLWGLEIGLLSMTKGETALFVLRPEYAYGQRCPPSIPPNTTVLFKVELLDF   |
| XP_013883182 | DVTVAGLELGLLTMKKGEFSRFLFQPYAYGDMGCPPFIPGAATVLYEVHVLDY   |
| XP_019947232 | DVTLAGLQLGLLTMKKGEFSRFLFQPYAYGDMGCPPFIIPAAAKILYEVQILDF  |
| KFP85199     | DITLGGVEVGLLTMKKGEVARFYFSPEYAYGHQCGPPLIPPNTSVVFDVEVLDF  |
| PWA27518     | DVTLAGLELGLLTMKKGEFSRFLLPQYAYGEMGCPPFIPAAAAIYEVHILDY    |
| XP_003971664 | DVTLTGLEMGLLTMKKGEFSRFLFEPQYAYGDLGCPPLIPAFSVVLYEVHILDF  |
| XP_005917666 | DVTLAGLELGLLTMKKGEFSRFLLPQYAYGEMGCPPFIPAAAVVLYEVQILDY   |
| XP_013764145 | DVTLAGLELGLLTMKKGEFSRFLLPQYAYGEMGCPPFIPAAAVVLYEVQILDY   |
| XP_013764144 | DVTLAGLELGLLTMKKGEFSRFLLPQYAYGEMGCPPFIPAAAVVLYEVQILDY   |
| CAG01803     | NVTLAGLEMGLLTMKKGEFSRFLFEPQYAYGDLGCPPLIPAFAEILYEVHILDF  |
| XP_005449738 | DVTLAGLEVGLLTMKKGEFSRFLLPQYAYGEMGCPPFIPAAAVVLYEVQILDY   |
| KFV20040     | DITLRGLELGLKTMKKGEAARFVFPDYAYGRLGCPPLIPPNTVTFEVEVLDF    |
| XP_018551539 | DVTLVGLELGLLTMQKGEFSRFLFQPYAYGDMGCPPFIPSSAVVLYEVQILDF   |
| XP_004542106 | DVTLAGLELGLLTMKKGEFSRFLLPQYAYGEMGCPPFIPTAAVVLYEVQILDY   |
| XP_005808385 | DVTLAGLELGLLTMKKGEFSRFLLPQYAYGEMGCPPFIPAAAAIYEVHVLDY    |
| KFO85715     | DITLRGLEIGLLTMTKGEAARFVFTPDYAYGQRCYPLIPCNATVVFEVEVLDF   |
| XP_015236136 | DVTLAGLELGLLTMKKGEFSRFLFDPQYAYGEMGCPPLIPAAATVLYEVQIVDY  |
| XP_023794777 | DITLCGLEIGLLSMTKGEAALFILTPKYAYGQRCPPSIPPNTTVLFKVEVLDF   |
| XP_015803473 | EVTLAGLEMGLLTMKRGEFSRFLFQPRYAYGDMGCPPLIPASATILYEVQLLDY  |
| KPP68264     | DVTLPGLEVGLLTMKSGEFSRFLFLPKYAYGDMGCPPLIPPSATILYEVHLLDF  |
| XP_020488061 | DVTLAGLELGLLTMKKGEFSRFLFQPYAYGDMGCPPFIPTAATVLYEVHILDF   |
| XP_015332442 | DITLWGMELGLLTMRRGELARFLFKPTYAYGALGCPPLIPPNTTVLFEIELLDF  |
| XP_013764143 | DVTLAGLELGLLTMKKGEFSRFLLPQYAYGEMGCPPFIPAAAVVLYEVQILDY   |
| XP_005449737 | DVTLAGLEVGLLTMKKGEFSRFLLPQYAYGEMGCPPFIPAAAVVLYEVQILDY   |
| KFO61461     | DITLWGLEIGLLSMTKGETALFVLRPEYAYGQRCPPSIPPNTTVLFKVELLDF   |
| XP_008298046 | DVTLAGLELGLLTMKKGEFSRFLLPQYAYGDMGCPPLIPAAAAVLYEVQILDY   |
| KFP07119     | DITLWGLEIGLLTMRKGERARFFFTPSYAYGAMGCPPLPPNAMVMFEVELLDF   |
| XP_007561093 | DVTLAGLELGLLTMKKGEFSRFLLPQYAYGEMGCPPFIPAAAAIYEVHVLDY    |
| PKU35662     | DITLLGLEIGLLTMKKGEVARFVMPDYAYGRQCGPPLIPPNTVMFEVEVLDF    |
| XP_010793476 | DLTLAGLELGLMTMRKGEFSRFLLPKYAYGEMGCPPLVPAAAVILYEVHILEF   |
| AWP19851     | DMTLAGLELGVLTMQNGEFSRFLFQPYAYGDLGCPPFIPGAAAVLYEVQILDI   |
| KFW82601     | DITLWGLELGLMSMARGEVARFWFSRYPYAYGPRGCPPHIPDPTTVLFHVELLDF |
| XP_008396659 | DVTLAGLELGLLTMKKGEFSRFLLPQYAYGEMGCPPFIPAAAAIYEVQVLDF    |
| XP_010739761 | EVTLAGLDLCLLTMKKGEFSRFLLEPQYAYGDLGCPPLIPAAAVVLYEIQIIDY  |
| XP_022046121 | DVTLAGLELGLLTMKKGEFSRFLLPQYAYGDMGCPSLIPRAAVVLYEVQILDY   |
| XP_019715044 | DMTLMGMMGLLTMRKGESSRFLLPQYAYGDMGCPPLIPAAARILFEIQIHDV    |
| XP_018875413 | DITLWGMELGLLTMRRGELARFLFKPNYAYGTLGSPPLIPPNTTVLFEIELLDF  |
| XP_014327714 | DVTLAGLELGLLTMKKGEFSRFLLPQYAYGEMGCPPFIPAAAAIYEVHVLDY    |
| XP_009081377 | DITLWGLELGLLSMAKELAWFIFVPKYAYGQMGCPPIPPNTTVLFLVLLDF     |
| AWP19849     | DMTLAGLELGVLTMQNGEFSRFLFQPYAYGDLGCPPFIPGAAAVLYEVQILDI   |
| XP_023134576 | DMTLAGLELGLLTMKKGEFCRFLLPQYAYGDMGCPPLIPAAAVVLYEVHILDY   |
| XP_012734526 | DVTVAGLELGLLTMKKGEFARFLLHHQYAYGEMGCPPFIPSSSTVLYEVHILDY  |
| XP_014403985 | DITLWGMELGLLTMRRGELARFLFKPPYAYGTLGCPPLIPPNTSTVLFIEILDF  |
| XP_017553083 | DVTLGCGLELGLLTMRKGEFSRFLFQPDYAFGEMGCPPLIPPAATVLYEVQVLEF |
| XP_023869472 | DVTLGCGLELGILTMRKGEFSRFLFLPEYAYGAMGCPPLIPPVATVLYEVQVLDF |
| XP_013992804 | DVTLGCGLELGILTMRKGEYSRFLFLPEYAYGAMGCPPLIPPVATVLYEVQVLDF |
| XP_020774925 | DVTLGCGLELGLLTMKKGEFSRFLLPQYAYGDMGCPPFIPAHAVILYEVHVLDY  |
| XP_024287709 | DVTLGCGLELGILTMRKGEFSRFLFLPEYAYGAMGCPPLIPPVATVLYEVQVLDF |
| XP_023869475 | DVTLGCGLELGILTMRKGEFSRFLFLPEYAYGAMGCPPLIPPVATVLYEVQVLDF |
| XP_013992805 | DVTLGCGLELGILTMRKGEYSRFLFLPEYAYGAMGCPPLIPPVATVLYEVQVLDF |
| XP_023869476 | DVTLGCGLELGILTMRKGEFSRFLFLPEYAYGAMGCPPLIPPVATVLYEVQVLDF |
| XP_024287708 | DVTLGCGLELGILTMRKGEFSRFLFLPEYAYGAMGCPPLIPPVATVLYEVQVLDF |
| XP_023869474 | DVTLGCGLELGILTMRKGEFSRFLFLPEYAYGAMGCPPLIPPVATVLYEVQVLDF |
| XP_011490382 | DLTLWGLELGLLTMKRGEHSRVLQPYAYGDLGCPPLIPAAAVVLYEVQIVDY    |
| XP_020570387 | DLTLWGLELGLLTMKRGEHSRVLQPYAYGDLGCPPLIPAAAVVLYEVQIVDY    |



|              |                                                          |
|--------------|----------------------------------------------------------|
| XP_008396657 | DVTLAGLELGLLTMKKGEFSRFLLPQYAYGEMGCPPFIPAAAAIlyEVQVLDY    |
| XP_014851597 | DVTLAGLELGLLTMKKGEFSRFLLPQYAYGEMGCPPFIPAAAAIlyEVHVLdy    |
| XP_020570386 | DLTLWGLELGLLTMKRGEHSRVLQPQYAYGDLGCPPLIPAAAVlyEVQIVdy     |
| XP_008396658 | DVTLAGLELGLLTMKKGEFSRFLLPQYAYGEMGCPPFIPAAAAIlyEVQVLDY    |
| XP_018774793 | DITLWGLEIGLLSMTKGEAALFVLTPEYAYGQRCPPSIPPNTTVLFKVEVLDF    |
| XP_023794778 | DITLCGLEIGLLSMTKGEAALFILTPKYAYGQRCPPSIPPNTTVLFKVEVLDF    |
| XP_024147377 | ELTLWGLELGLLTMKRGELSRFLFQPEYAYGDLGCPPLIPAAARVlyEVQILDY   |
| XP_024147375 | ELTLWGLELGLLTMKRGELSRFLFQPEYAYGDLGCPPLIPAAARVlyEVQILDY   |
| XP_024147378 | ELTLWGLELGLLTMKRGELSRFLFQPEYAYGDLGCPPLIPAAARVlyEVQILDY   |
| XP_014851599 | DVTLAGLELGLLTMKKGEFSRFLLPQYAYGEMGCPPFIPAAAAIlyE-----     |
| XP_008396660 | DVTLAGLELGLLTMKKGEFSRFLLPQYAYGEMGCPPFIPAAAAIlyE-----     |
| XP_017593619 | DITLWGLEIGLLSMTKGETALFVLRPEYAYGQRCPPSIPPNTTVLFKVELLDF    |
| XP_008396661 | DVTLAGLELGLLTMKKGEFSRFLLPQYAYGEMGCPPFIPAAAAIlyEVQVLDY    |
| XP_014851600 | DVTLAGLELGLLTMKKGEFSRFLLPQYAYGEMGCPPFIPAAAAIlyEVHVLdy    |
| XP_019619874 | GSVVPGEIAISSMKKGERSRFLVQPNYGYGKFGCPPRIPGNATVlyEIEMLNF    |
| XP_016801711 | DITLWGMELGLLSMRGQLARFLFKPNYAYGTPGSPPLIPPNTTVLFEIELLDF    |
| XP_023710706 | G-FITGLDIAIASMKKGETSRFLIHPDKAYGKLGCPPRIPQNAELLFEVELVKF   |
| XP_020627099 | EELLPGWYIGVSTMRRGEKSKFLLSPEYAFKDLGSPRVPPSATVLFVEELLSY    |
| XP_006793207 | DVTLAGLELGLLTMKKGEFSRFLLPQYAYGEMGCPPFIPAAAVlyEVQILDY     |
| XP_011402831 | HQVIEGLEVGVASMRKEEVSQFLVKSPYAFGDMGCPPRIPPAASILFEVEVLSF   |
| XP_022801008 | EENILGLYYGLRTMRKGEKSKFLVTPEYAYLEMGTPrIPASAKVLFVEELLSF    |
| XP_013786360 | ERVILGLDVGVGTMKKGEVAQFLIRPEYAFGQMGCPPRIPP NATVMYEVELISY  |
| XP_022254671 | ERVILGLDVGVGTMKKGEVAQFLIRPEYAFGQMGCPPRIPP NATVMYEVELISY  |
| ELT98785     | EEVTPGFEIAVASMRKREEARFLVQPRYFLGTVGCPPRIPGNEPVLFWIQMVDF   |
| XP_021353947 | GQLVEGLELGLSTMKKGELSRIITYDYAFGKLGCAPRIPPESTVMYEVELLSF    |
| XP_022108900 | GQVIPGLEIAVSTM RKGEKSDFLVSPEYAFGPRGVPPRIPENATILFVIELLAI  |
| XP_022108899 | GQVIPGLEIAVSTM RKGEKSDFLVSPEYAFGPRGVPPRIPENATILFVIELLAI  |
| XP_002167164 | GEGIEGWQIAISTMRKEISKFLLHPTVAFGKMGCPPRIP SNAEVLFEIELISY   |
| KOF62423     | DMVIPGWVIAVTTMQVGELSRLISPEYGFDFGCPPRIPKAITALFEIELLSF     |
| XP_014790271 | DMVIPGWVIAVTTMQVGELSRLISPEYGFDFGCPPRIPKAITALFEIELLSF     |
| XP_001636239 | EGAFPGLDIGVSTM RKGELSRLFDKEYVFKDLGCEPRVPG-ATVMWEVELLSF   |
| XP_023237057 | NRVVEGLDIAVATMKKGEISQFLIKYLYAYGEMGSPPRIPPSATILYEVELLSF   |
| XP_002128893 | GQVIHGLDIGISTMRKFEIARFLIESTYAYGNMGCPPRIPGHALVCFEVELLGY   |
| XP_009051935 | GAVIIGLEIAVSSMKKGEKSRYLFTPEYAYGRMGCGERIPGNSTVLAEEVELLSF  |
| XP_012221039 | NCLIPGLELGILSMKKHEIAMFLIHPDLAYKALGCPPRIPPNEEVVFI VHLDI   |
| XP_012264923 | GMLIPGLDIGIQTMKKYEQSVFVINSDYAYGAMGCPPRIPPNEVDVLFIVILESF  |
| XP_009857551 | GQVIHGLDIGISTMRKFEIARFLIESTYAYGNMGCPPRIPGHALVCFEVELLGY   |
| XP_015515854 | GVLLPGLEIGIQTMKKHEISHFIIHPDYAFGPMGCPPRIPPNEEVMFAVYLSDF   |
| XP_011415211 | GGLIVGLDLAVSSMKKGELARYIIRPQYAFGEMGTPrIPKDATVMYEVELLNF    |
| XP_020909274 | GGAFPGLDIALSTM RKGELAKFLFKKEYVFKDLGCEPRVPG-GTVLWEIELLGF  |
| EKC39444     | GGLIVGLDLAVSSMKKGELARYIIRPQYAFGEMGTPrIPKDATVMYEVELLNF    |
| XP_013405452 | GDTIMGLEIAVSSMRKGELARFISYKYAYGERGCPPRIGEKADVMFEVELLNF    |
| XP_011148430 | NIIIPGLEIAICSMRKHEVAVFWLHPDYAYRAIGCLPRIPP NVEVAFIVHLTDF  |
| XP_013405451 | GDTIMGLEIAVSSMRKGELARFISYKYAYGERGCPPRIGEKADVMFEVELLNF    |
| PVD31214     | DSRVLGFHVAVSTMKKGEISRFLFKPTYFYGAMGCGQRIPP NCTALFDIELLSF  |
| PIK39047     | GEVIEGMELAISTMRQGELSKFLIAPEFAYGKYGCGKRIPPDSEILMEIELISF   |
| XP_022336187 | GGLIVGLDLAVSSMKKGELARV IIRPQYAFGEMGTPrIPKDATVlyEVELLNF   |
| XP_022337811 | GGLIVGLDLAVSSMKKGELARV IIRPQYAFGEMGTPrIPKDATVlyEVELLNF   |
| XP_014787871 | GKAIPGWEIALLTMKKGEISWFLIQPEYGFQETGCPPRVPR NATALFEIEILSI  |
| EFN78601     | NIIIPGLEIAICSMRKHEVAVFWLHPDYAYRAIGCLPRIPP NVEVAFIVHLTDF  |
| XP_014475449 | GMVIPGLELGIASMRKHEISVFWLHPDYAYKAIGCQPRIPP NAEIVFI VHLDI  |
| XP_014279621 | GDLYLGFEKSLLTMRGEKSQLVHSDYAFGKLGAPPRITPNATILLEIELIKI     |
| XP_022193504 | GEALIGVELALKTMKKGESSQFIVEPEYAFGKLGCPPRVPPESTVLFDI EVIDY  |
| XP_014204130 | GQVLQGLEIAICSMKKFEKALFIIQPSLAYGELGCLPRVPP NAEVLFKIDLIDF  |
| KOX75315     | GALIPGLEIGISTMQKHEIAIFIIHPDFAYGKYGCAPRIPPNEEILFIVHLVDY   |
| XP_014234164 | GAVIPGLEIGISSMKKFEKSLFIIQSELAYGELGCMPRIPP NAEVLFKVELVDF  |
| KII63942     | CDGLPGLQIGLSTM RKDEEAKFILRPDYAYGRFGCPPRIPP NSVVFIDVELISY |
| XP_024936423 | GECIVGLEIGIRSMRKHEVAHFIIHPDLAFGKMGCCLPRIPP NEVDVFAVHVVDf |

XP\_015586170 GECIVGLEIGIRSMRKHEVAHFIIHPDLAFGKMGCPLPRIPPNEEDVLFVAVHVVD  
 XP\_003486736 DSQLPGLEIGITSMKKHEIAMFLIHPDLAYGKYGCAPRIPPNEEVLFIVHLTDY  
 XP\_019882220 GYIIPGLEIGISTMQKHEIAIFLIHPDLAYKAFGCPPRIPPNEEVVVFVHLIDY  
 XP\_003402471 DSQLPGLEIGIASMKKHEIAMFLIHPDLAYGKYGCAPRIPPNEEVLFIVHLTDY  
 XP\_012134979 GMLIPGLEIAIASMRKHEIAIFIIHPDLAYGKYGCAPRIPPNEEILFVVHLVDY  
 XP\_017756606 GMLIPGLEIAIASMQKHEIAIFIIHPDLAYGKYGCPPRVPPNEEILFIVHLVDY  
 XP\_012134978 GMLIPGLEIAIASMRKHEIAIFIIHPDLAYGKYGCAPRIPPNEEILFVVHLVDY  
 XP\_003700792 GMLIPGLEIAIASMRKHEIAIFIIHPDLAYGKYGCAPRIPPNEEILFVVHLVDY  
 XP\_023290805 GQLLPGLEIAIASMKKHETSLFLIQPSLAYMELGCMPLVPPNSEVLFVFAIKLLDY  
 XP\_012270499 GQLLPGLEIAIASMKKHETSLFLIQPSLAYMELGCMPLVPPNSEVLFVFAIKLLDY  
 XP\_018309319 SFIIPGLEIGIRSMQKHEIAIFLIHPDYAYKAVGCPPRIPPNEEVIFVVLVDY  
 XP\_012062619 SFIIPGLEIGVRSMQKHEIAVFLIHPDYAYKAVGCPPRIPPNEEVVVFVHLVDY  
 XP\_012527508 DCILPGLEIGIRSMQKHEIAVFLIHPDLAFKSLGCMRIPPNEEVVVFVHLIDY  
 XP\_005089179 GQCIRGLELALLSMKKHETARFLIHHDYAYGEMGCPPRIPKSTSLIYDVEILYF  
 XP\_003424555 GGMIEGLEIAISTMRKYEKAIFIIQPHLAYGKLGCLPRIPPDSEVLFKIELIDF  
 XP\_018055399 SFIIPGLEIGVRSMQKHEIAVFLIHPDYAYKAVGCPPRIPPNEEVVVFVHLVDY  
 XP\_017877748 GTLIPGLDYAISSMKKHEVAVFIIHPDLGYGQYGCPPRIPPNEEILFVVLQDDY  
 XP\_018399012 SFIISGLEIGIRSMQKHEIAVFLIHPDYAFKAIGCPPRIPPNEEVIFVVLVDF  
 KYM99352 SFIISGLEIGIRSMQKHEIAVFLIHPDYAFKAIGCPPRIPPNEEVIFVVLVDF  
 XP\_018309322 SFIIPGLEIGIRSMQKHEIAIFLIHPDYAYKAVGCPPRIPPNEEVIFVVLQDDY  
 XP\_011647883 SCIIISGLEIGISTMQKHEIAVFLIHPDLAYKAFGCPPRIPPNEEVVVFVQLLDY  
 XP\_014247948 QVVYEGFELSICTMKKGEKSQFLIDHTYAFGKMGAPPRIPPCATILVEIELINF  
 XP\_011064230 NCIIISGLEIGIRSMQKHEIAVFLIHPDYAYKAIGCPPRIPPNEEVVVFVHLVDY  
 XP\_014613253 GLLIPGLELALTMEKHEISIFIIHPDLAYGRLGCPPRILPNTVEVMFIVHLVDF  
 XP\_002430548 VETILGLNYAVKTMKKSENSRFFIKWEYAFGSLGCPDRIEPKCDIVADITLVDY  
 XP\_014247946 QVVYEGFELSICTMKKGEKSQFLIDHTYAFGKMGAPPRIPPCATILVEIELINF  
 XP\_014270488 GALYPGFYSLSSMKLNEHSRFLVSPKYGFGDMGCPPRIPP NATLLLEIELLKI  
 ORY30517 GRVIKGWDEGLVTMRVGEKAELLIDPEYGYGVEGNPPTIPP NSTLLFEVEVISS  
 XP\_011330216 ANIIPGLHMSICSMQKHEIAVFLIHPDLAYKTFGCPPRIPPNEEVVVFVHLIDY  
 EGI60945 SFIIPGLEIGIRSMQKHEIAVFLIHPDYAYKAVGCPPRIPPNEEVVVFVHLVDY  
 XP\_001201219 GSVIPGMDLALSTMRTGEMSKFLIHPDHAYGKLGVPPRIP-----  
 XP\_011061927 SFIIPGLEIGIRSMQKHEIAVFLIHPDYAYKAVGCPPRIPPNEEVVVFVHLVDY  
 XP\_018356457 SFIIPGLEIGIRTMQKHEIAVFLIHPDYAYKAVGCPPRIPPNEEVVVFVHLVDY  
 XP\_011173578 NIVIPGLEIGIRSMQKHEIAIFVIHPDFAFGALGCLPRIPPNEEVAFVVLHLLDF  
 XP\_018356456 SFIIPGLEIGIRTMQKHEIAVFLIHPDYAYKAVGCPPRIPPNEEVVVFVHLVDY  
 XP\_016917008 GMLIPGLEIGITTMQKHEIAMFIIHPDLAYGKYGCAPRIPPNEEILFIVHLTDY  
 XP\_018374414 SFIIPGLEMGIRSMQKHEIAVFLIHPDYAYKAVGCPPRIPPNEEVVVFVHLVDY  
 XP\_016917007 GMLIPGLEIGITTMQKHEIAMFIIHPDLAYGKYGCAPRIPPNEEILFIVHLTDY  
 XP\_019882221 GYIIPGLEIGISTMQKHEIAIFLIHPDLAYKAFGCPPRIPPNEEVVVFVHLIDY  
 XP\_011191641 E-VIEGLEVAVRTMQRGEQAQFVISHQLLFGEIGCPPRIKPSADGLFIIELVSF  
 PFH33404 QQVIRGWDVGVMMKMRGERAMLTIQSNYGYGSRGAPPTIPANSVLKFDVELIDS  
 XP\_019876143 GEVLLGLDLAVQSMKAGEKSQFLFSPTYAYGKMGCGRIPANTQVLFIEIELKEI  
 XP\_014299498 GELIHGLELSIQSMKKHEVSAFLIDPDLAYGEIGCWPNI PGNSEVLFIVNLIDY  
 KOC63519 GRLIPGLEIALTTMRHEIAMFIVHPDLAYGKFGCAPRIPPNEEQILFVVHLVDY  
 XP\_015126020 GQLIPGFELAIQSMKKHEISIFWVHPDYAFGELGCAPLIPPSAEIMYVISLIDY  
 XP\_005186588 E-VLQGLEDAVCTMHKGENAQFLISYNLLFREMGCPPRVKPKADGLFIIEVVSY  
 XP\_011879049 NFILPGLEIAIRSMRKHEKSVFIIHPDLAYKAIGCPPRIPPNEEVAFIVHLIDY  
 XP\_013109471 E-VLEGLEHAVCTMRKGENAQFVISYHLLFREMGCPPRVKPKADGLFIIELVGF  
 XP\_011879048 NFILPGLEIAIRSMRKHEKSVFIIHPDLAYKAIGCPPRIPPNEEVAFIVHLIDY  
 XP\_018333359 GEVILGLDMAVQSMKINEKSQFLVHPDYAYGRRGCLERIPENATILYEIELKNF  
 EFZ09302 NIVIPGLEIGIRSMQKHEIAIFVIHPDFAFGALGCLPRIPPNEEVAFVVLHLLDF  
 XP\_016927793 S-VVMGLEAAVLTMRPYEQAEFIISYKLLFGELGCPPRIKPMADALLKVEVIDY  
 XP\_006611831 GMLIPGLEIGITTMQKHEIAMFIIHPDLAYGKYGCAPRIPPNEEILFIVHLTDY  
 XP\_014245088 GVLYKGMEIAIATMSKERSQFLVPEQLAFGKYGVPPRIPP NATILNVIDLIDF  
 XP\_018790058 E-VIEGLEEAVRTMYRGEQAQFVISHHLLFREIGCPPRIKPSADGLFIIELVSF  
 XP\_020893545 GGAFPGDLIDLSTMGKELSKFLFKKEYVFKDLGCEPRVPG-GTVLWEIELLGF  
 XP\_002092689 T-VVEGLEAAVRTMRPYEQAEFIISYKLLFGELGCPPRIKPKADALFKVEVIDY  
 XP\_020293583 -EVLPGGLALGLQTMKDEIAAFLIHPDLAYKALGCAPTIPPNSVVLVHVHLLSF

XP\_016952968  
XP\_003689972  
XP\_015185328  
XP\_024867102  
XP\_011130643  
XP\_011206843  
XP\_008560701  
XP\_011695993  
PIK55877  
XP\_022218357  
XP\_017120033  
XP\_022165811  
XP\_017070534  
XP\_001942690  
XP\_003883131  
XP\_014091483  
XP\_015376375  
KOF66856  
XP\_015431627  
ORX48915  
XP\_001958659  
XP\_013077159  
XP\_013077158  
XP\_016974015  
KFG33606  
XP\_017045419  
PUA87907  
XP\_017001929  
XP\_009012598  
XP\_008888049  
XP\_023297605  
XP\_002594856  
XP\_018896035  
XP\_004517316  
XP\_017148191  
XP\_002412109  
XP\_014507068  
XP\_011298074  
ESS30489  
EPR59296  
OAJ38225  
XP\_018637740  
KYK63140  
CEL73032  
AAX51680  
AFJ24780  
NP\_611837  
XP\_012342118  
XP\_002082854  
XP\_002040150  
XP\_021954336  
XP\_001357527  
XP\_002015409  
XP\_017469679  
XP\_020810045

S-VIMGLEAAVLTMRPYEQAEFIISYKMLFGELGCPPRIKPMADALLKVEIDY  
GMLIPGLEIGITTMQKHEIAMFIIHPDLAYGKYGCAPRIPPNEEILFIVHLTDY  
GYLIPGLELAITTMKEKHEISIFIIHPDLAYGQIGCPPRILPNTEVMFIVHLVDF  
GYIIPGLEFGICSMKKHEIAVFLIHPDLAYKAIGCPPRIPPNEEVVVFVHLIDY  
GQVIKGDVDCVMSMKKEKCRVELQPDFAYGEHGSPTIPPNAVLVFEIELLEF  
E-VIEGLEEAVRTMYRGEQAQFVISHHLLFREIGCPPRIKPSADGLFIIELVSF  
GELIWGLDLSIQSMLKHEVSIFLIDPSLAYGEMGCWPTIPGNSEVMFIVHLIDY  
HFVIPGLEIGLCSMQKHEIAVFLMHPDYAYKAKGCPPRVPPNEEVVVFVHLIDY  
GEVIEGMELAISTMRQGELSKFLIAPEFAYGKYGCGKRIPPDSEILMEIELISF  
CDVLEGLQAAVLTMRTYEKAEFIISYKLLFHEMGCPPRIKPRADGLFKIEVLHF  
M-VIEGLEAAVRTMRPYEQAEFIISYKLLFRELGCPPRIKPMADGLFKVEIDF  
GELLPGLEIGIKTMTIGENARFIVKPELAYRELGCPPRIPP NATILFDVHLVS  
K-VLEGLEAAVRTMRPYEQAEFIISHKLLFRELGCPPRIKPKADGLFKVEIDY  
GELIPGLEIGIKTMTTGENARFIIKPELAYRELGCPPRIPP NATVLFDVHLVS  
GQVISGWDLGVMKMKRGERAMLTIQPGYGYGASGSPPVIPPNAVLKFDVLELDS  
E-VIEGLEEAVRTMYRGEQAQFVISHHLLFREIGCPPRIKPSADGLFIIELVSF  
GELLPGLEIGIKTMTTGENSRFIIKPELAYRELGCPPRIPP NATILFDVHLVS  
GKAIPGWEIALLTMKKEISWFLIQPEYGFQETGCPPRVPRNATALFEIEILSI  
GSLLPGLEIAISTMQKHEIAIFIVHSDLAYGRFGCAPRIPPNEQILFIVHLIDY  
GEVIRAWDIGIATIRRGEQASLLCAPEYAYGESGSPPSIPGNSTLRFIEGLNI  
K-VIEGLEAAVLTMRPYEQAEFIISYKLLFRELGCPPRIKPKADGLFKVEIDF  
GASILGLELAILSMKHEISRFLIHYSYGYGEMGCPPRIPP KATLIIDLEVMF  
GASILGLELAILSMKHEISRFLIHYSYGYGEMGCPPRIPP KATLIIDLEVMF  
M-VLEGLEAAVRTMRPYEQAEFIISYKLLFRELGCPPRIKPKADGLFKVEIDF  
GQVIRGWDLGVMKMKRGERAMLTIQPDYGYGASGSPPVIPPNSVLKFDVLELDS  
M-VIEGLEAAVRTMRPYEQAEFIISYQLLFRELGCPPRIKPKADGLFKVEIDY  
GQVIRGWDLGVMKMKRGERAMLTIQPDYGYGASGSPPVIPPNSVLKFDVLELDS  
M-VIVGLESVRTMRPYEQAEFIISYKLLFGELGCPPRIKPKADGLLKVEIDY  
MTTLVGFSKALES MRKGEKASFYIAPQYAFGKLGCPKKIPP NATCLYIIELIDY  
GQVIRGWDLGVMKMKRGERAMLTIQPDYGYGASGSPPVIPPNSVLKFDVLELDS  
E-VLEGLEAVRTMHKGEHAQFVISYHLLFREMGCPPRVKPKADGLFIIELVS  
GSVVPGEIAISSMRKGERSRFLVQPNYGYGKFGCPPRIPP NATILYEIMLN  
GPLLRGLDIGVGTMTGEVSWFLVHHDYAYGKLGCGNRIPKEATILFEVTLVS  
E-VIEGLEAAVRTMYRGEQAQFVISYHLLFREFGCPPRIKPRADGLFIIELVSF  
CDVLEGLQAAVLTMRPYEKAEFIISYKLLFHEIGCPPRIKPRSDGLFKIEVLDF  
DVMVLGLAKALMTMRKGERARVLVQPEYAFGKMGCAPRIPP NATILYEVELLHF  
GQVIKGDWDEGIKTMKKGENALFTIPPELAYGESGSPTIPP NATLQFDVLELDS  
GQLIPGFELAIKSMKKHEVSLFWVDFDYAFGELGCAPLIPPRADIIFVLVSLIDY  
GQVIRGWDLGVMKMKRGERAMLTIQPDYGYGASGSPPVIPPNSVLKFDVLELDS  
GQVIRGWDLGVMKMKRGERAMLTIQPDYGYGASGSPPVIPPNSVLKFDVLELDS  
GMVIKGDVGLATMRVGEKASLLIYPEYGYGPQGSPPKIPGNSTLLFDVLELVS  
GQVIRGWDLGVMKMKRGERAMLTIQPDYGYGASGSPPVIPPNSVLKFDVLELDS  
GQVIRGWDLGVMKMKRGERAMLTIQPDYGYGASGSPPVIPPNSVLKFDVLELDS  
GQVIRGWDLGVMKMKRGERAMLTIQPDYGYGASGSPPVIPPNSVLKFDVLELDS  
GQVIRGWDLGVMKMKRGERAMLTIQPDYGYGASGSPPVIPPNSVLKFDVLELDS  
GQLLTGLDIALQSMCKKERANFVFDSSVMFGELGVPPRIPGGADIYAEVEIDF  
T-VVEGLEAVRSMRPYEQAEFIISYKLLFGELGCPPRIKPKADALFKVEIDY  
GMLIPGLEIGITTMQKHEIAMFIIHPDLAYGKYGCAPRIPPNEEILFIVHLTDY  
T-VVEGLEAAVRSMRPYEQAEFIISYKLLFGELGCPPRIKPKADALFKVEIDY  
T-VVEGLEAAVRSMRPYEQAEFIISYKLLFGELGCPPRIKPKADALFKVEIDY  
GELLLGVEFGVKTMRVGEISKFLFEPEYAYGKLGCP TVIPSNSRILMVIEMVRA  
CDVLEGLQAAVLTMRPYEKAEFIISYKLLFHEMGCPPRIKPRSDGLFKIEVLHF  
CDVLEGLQAAVLTMRPYEKAEFIISYKLLFHEMGCPPRIKPRSDGLFKIEVLHF  
E-VIEGLEAAVRTMYRGEQAQFVISYQLLFREIGCPPRVKPRADGLFIIELVSF  
M-VLEGLEAAVRTMRPYEQAEFIISYKLLFRELGCPPRIKPKADGLFKVEIDY

. : . : \*
