# Supplementary material for: Compression of Large Sets of Sequence Data Reveals Fine Diversification of Functional Profiles in Multigene Families of Proteins: A Study for Peptidyl-Prolyl cis/trans Isomerases (PPIase)
Source: MDPI journal article supplement (doi:10.3390/biom9020059), 2019-02-11
Supplement: s1 [file s1]

CLUSTAL 2.0.9 multiple sequence alignment cyp157

```

NP_005376      DRPQCHFDIEINREPVGRI MFQLFSDICPKTKCNFLCLCSGEKGLGKTTGKKLCYKGSTF
XP_014646452  DRPQCHFDIEINREPVGRI MFQLFSDICPKTKCNFLCLCSGEKGLGKTTGKKLCYKGSTF
XP_017657797  DRPQCHFDIEINREPVGRI MFQLFSDICPKTKCNFLCLCSGEKGLGKTTGKKLCYKGSTF
XP_012885690  DRPQCHFDIEINREPVGRI MFQLFSDICPKTKCNFLCLCSGEKGRGKTTGKKLCYKGSTF
XP_008530969  DRPQCHFDIEINREPVGRI MFQLFSDICPKTKCNFLCLCSGEKGLGKTTGKKLCYKGSTF
XP_015423871  DRPQCHFDIEINREPVGRI MFQLFSDICPKTKCNFLCLCSGEKGLGKTTGKKLCYKGSTF
XP_015091833  DRPQCHFDIEINREPVGRI MFQLFSDICPKTKCNFLCLCSGEKGLGKTTGKKLCYKGSTF
XP_010973060  DRPQCHFDIEINREPVGRI MFQLFSDICPKTKCNFLCLCSGEKGLGKTTGKKLCYKGSTF
XP_019583096  DRPQCHFDIEINREPVGRI MFQLFSDICPKTKCNFLCLCSGEKGLGKTTGKKLCYKGSTF
XP_011231111  DRPQCHFDIEINREPVGRI MFQLFSDICPKTKCNFLCLCSGEKGLGKTTGKKLCYKGSTF
XP_014646457  DRPQCHFDIEINREPVGRI MFQLFSDICPKTKCNFLCLCSGEKGLGKTTGKKLCYKGSTF
XP_023988069  DRPQCHFDIEINREPVGRI MFQLFSDICPKTKCNFLCLCSGEKGLGKTTGKKLCYKGSTF
XP_008530970  DRPQCHFDIEINREPVGRI MFQLFSDICPKTKCNFLCLCSGEKGLGKTTGKKLCYKGSTF
XP_017497119  DRPQCHFDIEINREPVGRI MFQLFSDICPKTKCNFLCLCSGEKGLGKTTGKKLCYKGSTF
XP_021503072  DRPQCHFDIEINREPVGRI MFQLFSDICPKTKCNFLCLCSGEKGLGKTTGKKLCYKGSTF
XP_021503071  DRPQCHFDIEINREPVGRI MFQLFSDICPKTKCNFLCLCSGEKGLGKTTGKKLCYKGSTF
XP_020041828  DRPQCHFDIEINREPVGRI MFQLFSDICPKTKCNFLCLCSGEKGLGKTTGKKLCYKGSTF
XP_021503070  DRPQCHFDIEINREPVGRI MFQLFSDICPKTKCNFLCLCSGEKGLGKTTGKKLCYKGSTF
XP_012590780  DRPQCHFDIEINREPVGRI MFQLFSDICPKTKCNFLCLCSGEKGLGKTTGKKLCYKGSTF
XP_019274390  DRPQCHFDIEINREPVGRI MFQLFSDICPKTKCNFLCLCSGEKGLGKTTGKKLCYKGSTF
XP_019489071  DRPQCHFDIEINREPVGRI MFQLFSDICPKTKCNFLCLCSGEKGLGKTTGKKLCYKGSTF
XP_019489063  DRPQCHFDIEINREPVGRI MFQLFSDICPKTKCNFLCLCSGEKGLGKTTGKKLCYKGSTF
XP_010588206  DRPQCHFDIEINREPVGRI MFQLFSDICPKTKCNFLCLCSGEKGLGKTTGKKLCYKGSTF
XP_023403600  DRPQCHFDIEINREPVGRI MFQLFSDICPKTKCNFLCLCSGEKGLGKTTGKKLCYKGSTF
XP_009982730  DRPQCFFEIEINREPVGRI MFQLFSDICPKTKCNFLCLCSGEKGIGKTTGKKLCYKGSTF
XP_019839655  DRPQCHFDIEINREPVGRI MFQLFSDICPKTKCNFLCLCSGEKGLGKTTGKKLCYKGSTF
XP_006512034  DRPQCHFDIEINREPVGRI MFQLFSDICPKTKCNFLCLCSGEKGLGKTTGKKLCYKGSTF
XP_024100264  DRPQCHFDIEINREPVGRI MFQLFSDICPKTKCNFLCLCSGEKGLGKTTGKKLCYKGSTF
XP_019666422  DRPQCHFDIEINREPVGRI MFQLFSDICPKTKCNFLCLCSGEKGLGKTTGKKLCYKGSTF
XP_008530962  DRPQCHFDIEINREPVGRI MFQLFSDICPKTKCNFLCLCSGEKGLGKTTGKKLCYKGSTF
XP_008530967  DRPQCHFDIEINREPVGRI MFQLFSDICPKTKCNFLCLCSGEKGLGKTTGKKLCYKGSTF
XP_010944204  DRPQCHFDIEINREPVGRI MFQLFSDICPKTKCNFLCLCSGEKGLGKTTGKKLCYKGSTF
XP_015091830  DRPQCHFDIEINREPVGRI MFQLFSDICPKTKCNFLCLCSGEKGLGKTTGKKLCYKGSTF
XP_014411884  DRPQCHFDIEINREPVGRI MFQLFSDICPKTKCNFLCLCSGEKGLGKTTGKKLCYKGSTF
XP_010944201  DRPQCHFDIEINREPVGRI MFQLFSDICPKTKCNFLCLCSGEKGLGKTTGKKLCYKGSTF
XP_009443554  DRPQCHFDIEINREPVGRI MFQLFSDICPKTKCNFLCLCSGEKGLGKTTGKKLCYKGSTF
XP_021241242  DRPQCFFDIEINREPVGRI MFQLFSDICPKTKCNFLCLCSGEKGIGKTTGKKLCYKGSTF
XP_020927360  DRPQCHFDIEINREPVGRI MFQLFSDICPKTKCNFLCLCSGEKGLGKTTGKKLCYKGSTF
XP_004581770  DRPQCHFDIEINREPVGRI MFQLFSDICPKTKCNFLCLCSGEKGLGKTTGKKLCYKGSTF
XP_005669469  DRPQCHFDIEINREPVGRI MFQLFSDICPKTKCNFLCLCSGEKGLGKTTGKKLCYKGSTF
XP_009443555  DRPQCHFDIEINREPVGRI MFQLFSDICPKTKCNFLCLCSGEKGLGKTTGKKLCYKGSTF
XP_005669468  DRPQCHFDIEINREPVGRI MFQLFSDICPKTKCNFLCLCSGEKGLGKTTGKKLCYKGSTF
XP_008708042  DRPQCHFDIEINREPVGRI MFQLFSDICPKTKCNFLCLCSGEKGLGKTTGKKLCYKGSTF
AAA37500      DRPQCHFDIEINREPVGRI MFQLFSDICPKTKCNFLCLCSGEKGLGKTTGKKLCYKGSTF
XP_004676331  DRPQCHFDIEINREPVGRI MFQLFSDICPKTKCNFLCLCSGEKGLGKTTGKKLCYKGSTF
XP_006748020  DRPQCHFDIEINREPVGRI MFQLFSDICPKTKCNFLCLCSGEKGLGKTTGKKLCYKGSTF
XP_006770577  DRPQCHFDIEINREPVGRI MFQLFSDICPKTKCNFLCLCSGEKGLGKTTGKKLCYKGSTF
XP_019583095  DRPQCHFDIEINREPVGRI MFQLFSDICPKTKCNFLCLCSGEKGLGKTTGKKLCYKGSTF
XP_015423867  DRPQCHFDIEINREPVGRI MFQLFSDICPKTKCNFLCLCSGEKGLGKTTGKKLCYKGSTF
XP_005383594  DRPQCHFDIEINREPVGRI MFQLFSDICPKTKCNFLCLCSGEKGLGKTTGKKLCYKGSTF
XP_019583089  DRPQCHFDIEINREPVGRI MFQLFSDICPKTKCNFLCLCSGEKGLGKTTGKKLCYKGSTF
XP_014445953  DRPQCHFDIEINREPVGRI MFQLFSDICPKTKCNFLCLCSGEKGLGKTTGKKLCYKGSTF
XP_005891140  DRPQCHFDIEINREPVGRI MFQLFSDICPKTKCNFLCLCSGEKGLGKTTGKKLCYKGSTF
XP_019489104  DRPQCHFDIEINREPVGRI MFQLFSDICPKTKCNFLCLCSGEKGLGKTTGKKLCYKGSTF
XP_012004520  DRPQCHFDIEINREPVGRI MFQLFSDICPKTKCNFLCLCSGEKGLGKTTGKKLCYKGSTF

```

|              |                                                               |
|--------------|---------------------------------------------------------------|
| XP_006051863 | DRPQCHFDIEINREPVGRI MFQLFSDICPKTKCNFLCLCSGEKGLGKTTGKKLCYKGSTF |
| XP_005954297 | DRPQCHFDIEINREPVGRI MFQLFSDICPKTKCNFLCLCSGEKGLGKTTGKKLCYKGSTF |
| XP_005695639 | DRPQCHFDIEINREPVGRI MFQLFSDICPKTKCNFLCLCSGEKGLGKTTGKKLCYKGSTF |
| XP_011954828 | DRPQCHFDIEINREPVGRI MFQLFSDICPKTKCNFLCLCSGEKGLGKTTGKKLCYKGSTF |
| XP_003992255 | DRPQCHFDIEINREPVGRI MFQLFSDICPKTKCNFLCLCSGEKGLGKTTGKKLCYKGSTF |
| XP_002702773 | DRPQCHFDIEINREPVGRI MFQLFSDICPKTKCNFLCLCSGEKGLGKTTGKKLCYKGSTF |
| XP_019666421 | DRPQCHFDIEINREPVGRI MFQLFSDICPKTKCNFLCLCSGEKGLGKTTGKKLCYKGSTF |
| XP_019489077 | DRPQCHFDIEINREPVGRI MFQLFSDICPKTKCNFLCLCSGEKGLGKTTGKKLCYKGSTF |
| XP_012004518 | DRPQCHFDIEINREPVGRI MFQLFSDICPKTKCNFLCLCSGEKGLGKTTGKKLCYKGSTF |
| XP_011954826 | DRPQCHFDIEINREPVGRI MFQLFSDICPKTKCNFLCLCSGEKGLGKTTGKKLCYKGSTF |
| XP_006051860 | DRPQCHFDIEINREPVGRI MFQLFSDICPKTKCNFLCLCSGEKGLGKTTGKKLCYKGSTF |
| XP_005695638 | DRPQCHFDIEINREPVGRI MFQLFSDICPKTKCNFLCLCSGEKGLGKTTGKKLCYKGSTF |
| XP_005196454 | DRPQCHFDIEINREPVGRI MFQLFSDICPKTKCNFLCLCSGEKGLGKTTGKKLCYKGSTF |
| XP_851976    | DRPQCHFDIEINREPVGRI MFQLFSDICPKTKCNFLCLCSGEKGLGKTTGKKLCYKGSTF |
| XP_012520957 | DRPQCHFDIEINREPVGRI MFQLFSDICPKTKCNFLCLCSGEKGLGKTTGKKLCYKGSTF |
| XP_005634360 | DRPQCHFDIEINREPVGRI MFQLFSDICPKTKCNFLCLCSGEKGLGKTTGKKLCYKGSTF |
| XP_003132182 | DRPQCHFDIEINREPVGRI MFQLFSDICPKTKCNFLCLCSGEKGLGKTTGKKLCYKGSTF |
| XP_020139644 | DRPQCHFDIEINREPVGRI MFQLFSDICPKTKCNFLCLCSGEKGLGKTTGKKLCYKGSTF |
| XP_014715584 | DRPQCHFDIEINREPVGRI MFQLFSDICPKTKCNFLCLCSGEKGLGKTTGKKLCYKGSTF |
| XP_007193513 | DRPQCHFDIEINREPVGRI MFQLFSDICPKTKCNFLCLCSGEKGLGKTTGKKLCYKGSTF |
| XP_005669463 | DRPQCHFDIEINREPVGRI MFQLFSDICPKTKCNFLCLCSGEKGLGKTTGKKLCYKGSTF |
| XP_004419619 | DRPQCHFDIEINREPVGRI MFQLFSDICPKTKCNFLCLCSGEKGLGKTTGKKLCYKGSTF |
| XP_003363180 | DRPQCHFDIEINREPVGRI MFQLFSDICPKTKCNFLCLCSGEKGLGKTTGKKLCYKGSTF |
| XP_014986734 | DRPQCHFDIEINREPVGRI MFQLFSDICPKTKCNFLCLCSGEKGLGKTTGKKLCYKGSTF |
| XP_014715581 | DRPQCHFDIEINREPVGRI MFQLFSDICPKTKCNFLCLCSGEKGLGKTTGKKLCYKGSTF |
| XP_014646446 | DRPQCHFDIEINREPVGRI MFQLFSDICPKTKCNFLCLCSGEKGLGKTTGKKLCYKGSTF |
| XP_006893048 | DRPQCHFDIEINREPVGRI MFQLFSDICPKTKCNFLCLCSGEKGLGKTTGKKLCYKGSTF |
| XP_012625718 | DRPQCHFDIEINREPVGRI MFQLFSDICPKTKCNFLCLCSGEKGLGKTTGKKLCYKGSTF |
| XP_010973061 | DRPQCHFDIEINREPVGRI MFQLFSDICPKTKCNFLCLCSGEKGLGKTTGKKLCYKGSTF |
| XP_010944206 | DRPQCHFDIEINREPVGRI MFQLFSDICPKTKCNFLCLCSGEKGLGKTTGKKLCYKGSTF |
| XP_007193512 | DRPQCHFDIEINREPVGRI MFQLFSDICPKTKCNFLCLCSGEKGLGKTTGKKLCYKGSTF |
| XP_015091829 | DRPQCHFDIEINREPVGRI MFQLFSDICPKTKCNFLCLCSGEKGLGKTTGKKLCYKGSTF |
| XP_014411882 | DRPQCHFDIEINREPVGRI MFQLFSDICPKTKCNFLCLCSGEKGLGKTTGKKLCYKGSTF |
| XP_006770574 | DRPQCHFDIEINREPVGRI MFQLFSDICPKTKCNFLCLCSGEKGLGKTTGKKLCYKGSTF |
| XP_006770573 | DRPQCHFDIEINREPVGRI MFQLFSDICPKTKCNFLCLCSGEKGLGKTTGKKLCYKGSTF |
| XP_003809334 | DRPQCHFDIEINREPVGRI MFQLFSDICPKTKCNFLCLCSGEKGLGKTTGKKLCYKGSTF |
| ELK25111     | DRPQCHFDIEINREPVGRI MFQLFSDICPKTKCNFLCLCSGEKGLGKTTGKKLCYKGSTF |
| XP_023087260 | DRPQCHFDIEINREPVGRI MFQLFSDICPKTKCNFLCLCSGEKGLGKTTGKKLCYKGSTF |
| XP_005546833 | DRPQCHFDIEINREPVGRI MFQLFSDICPKTKCNFLCLCSGEKGLGKTTGKKLCYKGSTF |
| XP_008258471 | DRPQCHFDIEINREPVGRI MFQLFSDICPKTKCNFLCLCSGEKGLGKTTGKKLCYKGSTF |
| XP_008258470 | DRPQCHFDIEINREPVGRI MFQLFSDICPKTKCNFLCLCSGEKGLGKTTGKKLCYKGSTF |
| XP_004708608 | DRPQCHFDIEINREPVGRI MFQLFSDICPKTKCNFLCLCSGEKGLGKTTGKKLCYKGSTF |
| XP_003309783 | DRPQCHFDIEINREPVGRI MFQLFSDICPKTKCNFLCLCSGEKGLGKTTGKKLCYKGSTF |
| XP_009443557 | DRPQCHFDIEINREPVGRI MFQLFSDICPKTKCNFLCLCSGEKGLGKTTGKKLCYKGSTF |
| XP_011889503 | DRPQCHFDIEINREPVGRI MFQLFSDICPKTKCNFLCLCSGEKGLGKTTGKKLCYKGSTF |
| XP_019274386 | DRPQCHFDIEINREPVGRI MFQLFSDICPKTKCNFLCLCSGEKGLGKTTGKKLCYKGSTF |
| XP_015392541 | DRPQCHFDIEINREPVGRI MFQLFSDICPKTKCNFLCLCSGEKGLGKTTGKKLCYKGSTF |
| XP_021573498 | DRPQCHFDIEINREPVGRI MFQLFSDICPKTKCNFLCLCSGEKGLGKTTGKKLCYKGSTF |
| XP_017396461 | DRPQCHFDIEINREPVGRI MFQLFSDICPKTKCNFLCLCSGEKGLGKTTGKKLCYKGSTF |
| XP_005546834 | DRPQCHFDIEINREPVGRI MFQLFSDICPKTKCNFLCLCSGEKGLGKTTGKKLCYKGSTF |
| XP_014986732 | DRPQCHFDIEINREPVGRI MFQLFSDICPKTKCNFLCLCSGEKGLGKTTGKKLCYKGSTF |
| XP_018879079 | DRPQCHFDIEINREPVGRI MFQLFSDICPKTKCNFLCLCSGEKGLGKTTGKKLCYKGSTF |
| XP_014986735 | DRPQCHFDIEINREPVGRI MFQLFSDICPKTKCNFLCLCSGEKGLGKTTGKKLCYKGSTF |
| XP_009443553 | DRPQCHFDIEINREPVGRI MFQLFSDICPKTKCNFLCLCSGEKGLGKTTGKKLCYKGSTF |
| XP_016861963 | DRPQCHFDIEINREPVGRI MFQLFSDICPKTKCNFLCLCSGEKGLGKTTGKKLCYKGSTF |
| XP_011839703 | DRPQCHFDIEINREPVGRI MFQLFSDICPKTKCNFLCLCSGEKGLGKTTGKKLCYKGSTF |
| XP_006713234 | DRPQCHFDIEINREPVGRI MFQLFSDICPKTKCNFLCLCSGEKGLGKTTGKKLCYKGSTF |
| XP_017396460 | DRPQCHFDIEINREPVGRI MFQLFSDICPKTKCNFLCLCSGEKGLGKTTGKKLCYKGSTF |

|              |                                                               |
|--------------|---------------------------------------------------------------|
| XP_018879080 | DRPQCHFDIEINREPVGRI MFQLFSDICPKTKCNFLCLCSGEKGLGKTTGKKLCYKGSTF |
| XP_010372621 | DRPQCHFDIEINREPVGRI MFQLFSDICPKTKCNFLCLCSGEKGLGKTTGKKLCYKGSTF |
| XP_007981992 | DRPQCHFDIEINREPVGRI MFQLFSDICPKTKCNFLCLCSGEKGLGKTTGKKLCYKGSTF |
| XP_009199351 | DRPQCHFDIEINREPVGRI MFQLFSDICPKTKCNFLCLCSGEKGLGKTTGKKLCYKGSTF |
| PNJ74565     | DRPQCHFDIEINREPVGRI MFQLFSDICPKTKCNFLCLCSGEKGLGKTTGKKLCYKGSTF |
| XP_023087259 | DRPQCHFDIEINREPVGRI MFQLFSDICPKTKCNFLCLCSGEKGLGKTTGKKLCYKGSTF |
| XP_009237437 | DRPQCHFDIEINREPVGRI MFQLFSDICPKTKCNFLCLCSGEKGLGKTTGKKLCYKGSTF |
| XP_023087256 | DRPQCHFDIEINREPVGRI MFQLFSDICPKTKCNFLCLCSGEKGLGKTTGKKLCYKGSTF |
| XP_010372620 | DRPQCHFDIEINREPVGRI MFQLFSDICPKTKCNFLCLCSGEKGLGKTTGKKLCYKGSTF |
| XP_004414069 | DRPQCHFDIEINREPVGRI MFQLFSDICPKTKCNFLCLCSGEKGLGKTTGKKLCYKGSTF |
| XP_011231109 | DRPQCHFDIEINREPVGRI MFQLFSDICPKTKCNFLCLCSGEKGLGKTTGKKLCYKGSTF |
| XP_015392540 | DRPQCHFDIEINREPVGRI MFQLFSDICPKTKCNFLCLCSGEKGLGKTTGKKLCYKGSTF |
| XP_011231110 | DRPQCHFDIEINREPVGRI MFQLFSDICPKTKCNFLCLCSGEKGLGKTTGKKLCYKGSTF |
| XP_015392538 | DRPQCHFDIEINREPVGRI MFQLFSDICPKTKCNFLCLCSGEKGLGKTTGKKLCYKGSTF |
| XP_004754311 | DRPQCHFDIEINREPVGRI MFQLFSDICPKTKCNFLCLCSGEKGLGKTTGKKLCYKGSTF |
| XP_011806342 | DRPQCHFDIEINREPVGRI MFQLFSDICPKTKCNFLCLCSGEKGLGKTTGKKLCYKGSTF |
| XP_005546832 | DRPQCHFDIEINREPVGRI MFQLFSDICPKTKCNFLCLCSGEKGLGKTTGKKLCYKGSTF |
| XP_005546835 | DRPQCHFDIEINREPVGRI MFQLFSDICPKTKCNFLCLCSGEKGLGKTTGKKLCYKGSTF |
| XP_023384831 | DRPQCHFDIEINREPVGRI MFQLFSDICPKTKCNFLCLCSGEKGLGKTTGKKLCYKGSTF |
| XP_015447191 | DRPQCHFDIEINREPVGRI MFQLFSDICPKTKCNFLCLCSGEKGLGKTTGKKLCYKGSTF |
| XP_006868826 | DRPQCHFDIEINREPVGRI MFQLFSDICPKTKCNFLCLCSGEKGLGKTTGKKLCYKGSTF |
| XP_006102363 | DRPQCHFDIEINREPVGRI MFQLFSDICPKTKCNFLCLCSGEKGLGKTTGKKLCYKGSTF |
| XP_005860445 | DRPQCHFDIEINREPVGRI MFQLFSDICPKTKCNFLCLCSGEKGLGKTTGKKLCYKGSTF |
| XP_019274385 | DRPQCHFDIEINREPVGRI MFQLFSDICPKTKCNFLCLCSGEKGLGKTTGKKLCYKGSTF |
| XP_014323127 | DRPQCHFDIEINREPVGRI MFQLFSDICPKTKCNFLCLCSGEKGLGKTTGKKLCYKGSTF |
| XP_005860444 | DRPQCHFDIEINREPVGRI MFQLFSDICPKTKCNFLCLCSGEKGLGKTTGKKLCYKGSTF |
| XP_023988067 | DRPQCHFDIEINREPVGRI MFQLFSDICPKTKCNFLCLCSGEKGLGKTTGKKLCYKGSTF |
| XP_019274384 | DRPQCHFDIEINREPVGRI MFQLFSDICPKTKCNFLCLCSGEKGLGKTTGKKLCYKGSTF |
| XP_017396459 | DRPQCHFDIEINREPVGRI MFQLFSDICPKTKCNFLCLCSGEKGLGKTTGKKLCYKGSTF |
| XP_008152845 | DRPQCHFDIEINREPVGRI MFQLFSDICPKTKCNFLCLCSGEKGLGKTTGKKLCYKGSTF |
| NP_001336053 | DRPQCHFDIEINREPVGRI MFQLFSDICPKTKCNFLCLCSGEKGLGKTTGKKLCYKGSTF |
| XP_007106821 | DRPQCHFDIEINREPVGRI MFQLFSDICPKTKCNFLCLCSGEKGLGKTTGKKLCYKGSTF |
| XP_018879078 | DRPQCHFDIEINREPVGRI MFQLFSDICPKTKCNFLCLCSGEKGLGKTTGKKLCYKGSTF |
| XP_017396458 | DRPQCHFDIEINREPVGRI MFQLFSDICPKTKCNFLCLCSGEKGLGKTTGKKLCYKGSTF |
| XP_012315533 | DRPQCHFDIEINREPVGRI MFQLFSDICPKTKCNFLCLCSGEKGLGKTTGKKLCYKGSTF |
| XP_007981991 | DRPQCHFDIEINREPVGRI MFQLFSDICPKTKCNFLCLCSGEKGLGKTTGKKLCYKGSTF |
| XP_003256959 | DRPQCHFDIEINREPVGRI MFQLFSDICPKTKCNFLCLCSGEKGLGKTTGKKLCYKGSTF |
| XP_003735136 | DRPQCHFDIEINREPVGRI MFQLFSDICPKTKCNFLCLCSGEKGLGKTTGKKLCYKGSTF |
| XP_019802415 | DRPQCHFDIEINREPVGRI MFQLFSDICPKTKCNFLCLCSGEKGLGKTTGKKLCYKGSTF |
| XP_018879076 | DRPQCHFDIEINREPVGRI MFQLFSDICPKTKCNFLCLCSGEKGLGKTTGKKLCYKGSTF |
| XP_012315532 | DRPQCHFDIEINREPVGRI MFQLFSDICPKTKCNFLCLCSGEKGLGKTTGKKLCYKGSTF |
| XP_011737181 | DRPQCHFDIEINREPVGRI MFQLFSDICPKTKCNFLCLCSGEKGLGKTTGKKLCYKGSTF |
| XP_011889502 | DRPQCHFDIEINREPVGRI MFQLFSDICPKTKCNFLCLCSGEKGLGKTTGKKLCYKGSTF |
| XP_010372619 | DRPQCHFDIEINREPVGRI MFQLFSDICPKTKCNFLCLCSGEKGLGKTTGKKLCYKGSTF |
| XP_007981990 | DRPQCHFDIEINREPVGRI MFQLFSDICPKTKCNFLCLCSGEKGLGKTTGKKLCYKGSTF |
| XP_004277919 | DRPQCHFDIEINREPVGRI MFQLFSDICPKTKCNFLCLCSGEKGLGKTTGKKLCYKGSTF |
| XP_003894654 | DRPQCHFDIEINREPVGRI MFQLFSDICPKTKCNFLCLCSGEKGLGKTTGKKLCYKGSTF |
| XP_019802412 | DRPQCHFDIEINREPVGRI MFQLFSDICPKTKCNFLCLCSGEKGLGKTTGKKLCYKGSTF |
| XP_017811031 | DRPQCHFDIEINREPVGRI MFQLFSDICPKTKCNFLCLCSGEKGLGKTTGKKLCYKGSTF |
| XP_008982345 | DRPQCHFDIEINREPVGRI MFQLFSDICPKTKCNFLCLCSGEKGLGKTTGKKLCYKGSTF |
| XP_003477052 | DRPQCHFDIEINREPVGRI MFQLFSDICPKTKCNFLCLCSGEKGLGKTTGKKLCYKGSTF |
| XP_013015643 | DRPQCHFDIEINREPVGRI MFQLFSDICPKTKCNFLCLCSGEKGLGKTTGKKLCYKGSTF |
| XP_007499863 | DRPQCHFDIEINREPVGRI MFQLFSDICPKTKCNFLCLCSGEKGLGKTTGKKLCYKGSTF |
| XP_023581750 | DRPQCHFDIEINREPVGRI MFQLFSDICPKTKCNFLCLCSGEKGLGKTTGKKLCYKGSTF |
| XP_002813940 | DRPQCHFDIEINREPVGRI MFQLFSDICPKTKCNFLCLCSGEKGLGKTTGKKLCYKGSTF |
| XP_014390380 | DRPQCHFDIEINREPVGRI MFQLFSDICPKTKCNFLCLCSGEKGLGKTTGKKLCYKGSTF |
| XP_014323126 | DRPQCHFDIEINREPVGRI MFQLFSDICPKTKCNFLCLCSGEKGLGKTTGKKLCYKGSTF |
| XP_024100262 | DRPQCHFDIEINREPVGRI MFQLFSDICPKTKCNFLCLCSGEKGLGKTTGKKLCYKGSTF |

|              |                                                               |
|--------------|---------------------------------------------------------------|
| XP_022409524 | DRPQCHFDIEINREPVGRI MFQLFSDICPKTKCNFLCLCSGEKGLGKTTGKKLCYKGSTF |
| XP_022409523 | DRPQCHFDIEINREPVGRI MFQLFSDICPKTKCNFLCLCSGEKGLGKTTGKKLCYKGSTF |
| XP_019802414 | DRPQCHFDIEINREPVGRI MFQLFSDICPKTKCNFLCLCSGEKGLGKTTGKKLCYKGSTF |
| XP_021062318 | DRPQCHFDIEINREPVGRI MFQLFSDICPKTKCNFLCLCSGEKGLGKTTGKKLCYKGSTF |
| XP_014390377 | DRPQCHFDIEINREPVGRI MFQLFSDICPKTKCNFLCLCSGEKGLGKTTGKKLCYKGSTF |
| XP_014323123 | DRPQCHFDIEINREPVGRI MFQLFSDICPKTKCNFLCLCSGEKGLGKTTGKKLCYKGSTF |
| XP_011889501 | DRPQCHFDIEINREPVGRI MFQLFSDICPKTKCNFLCLCSGEKGLGKTTGKKLCYKGSTF |
| XP_015344917 | DRPQCHFDIEINREPVGRI MFQLFSDICPKTKCNFLCLCSGEKGLGKTTGKKLCYKGSTF |
| XP_011889500 | DRPQCHFDIEINREPVGRI MFQLFSDICPKTKCNFLCLCSGEKGLGKTTGKKLCYKGSTF |
| XP_016018800 | DRPQCHFDIEINREPVGRI MFQLFSDICPKTKCNFLCLCSGEKGLGKTTGKKLCYKGSTF |
| XP_019802413 | DRPQCHFDIEINREPVGRI MFQLFSDICPKTKCNFLCLCSGEKGLGKTTGKKLCYKGSTF |
| XP_023581752 | DRPQCHFDIEINREPVGRI MFQLFSDICPKTKCNFLCLCSGEKGLGKTTGKKLCYKGSTF |
| XP_008847679 | DRPQCHFDIEINREPVGRI MFQLFSDICPKTKCNFLCLCSGEKGLGKTTGKKLCYKGSTF |
| XP_016018799 | DRPQCHFDIEINREPVGRI MFQLFSDICPKTKCNFLCLCSGEKGLGKTTGKKLCYKGSTF |
| XP_016018798 | DRPQCHFDIEINREPVGRI MFQLFSDICPKTKCNFLCLCSGEKGLGKTTGKKLCYKGSTF |
| XP_017497112 | DRPQCHFDIEINREPVGRI MFQLFSDICPKTKCNFLCLCSGEKGLGKTTGKKLCYKGSTF |
| XP_023371677 | DRPQCHFDIEINREPVGRI MFQLFSDICPKTKCNFLCLCSGEKGLGKTTGKKLCYKGSTF |
| XP_007947878 | DRPQCHFDIEINREPVGRI MFQLFSDICPKTKCNFLCLCSGEKGLGKTTGKKLCYKGSTF |
| XP_007445750 | DRPQCHFDIEINREPVGRI MFQLFSDICPKTKCNFLCLCSGEKGLGKTTGKKLCYKGSTF |
| XP_011889497 | DRPQCHFDIEINREPVGRI MFQLFSDICPKTKCNFLCLCSGEKGLGKTTGKKLCYKGSTF |
| XP_020854834 | DRPQCHFDIEINREPVGRI MFQLFSDICPKTKCNFLCLCSGEKGLGKTTGKKLCYKGSTF |
| XP_012315531 | DRPQCHFDIEINREPVGRI MFQLFSDICPKTKCNFLCLCSGEKGLGKTTGKKLCYKGSTF |
| XP_020854833 | DRPQCHFDIEINREPVGRI MFQLFSDICPKTKCNFLCLCSGEKGLGKTTGKKLCYKGSTF |
| XP_012315530 | DRPQCHFDIEINREPVGRI MFQLFSDICPKTKCNFLCLCSGEKGLGKTTGKKLCYKGSTF |
| XP_022409521 | DRPQCHFDIEINREPVGRI MFQLFSDICPKTKCNFLCLCSGEKGLGKTTGKKLCYKGSTF |
| XP_023384830 | DRPQCHFDIEINREPVGRI MFQLFSDICPKTKCNFLCLCSGEKGLGKTTGKKLCYKGSTF |
| XP_020041827 | DRPQCHFDIEINREPVGRI MFQLFSDICPKTKCNFLCLCSGEKGLGKTTGKKLCYKGSTF |
| XP_015344916 | DRPQCHFDIEINREPVGRI MFQLFSDICPKTKCNFLCLCSGEKGLGKTTGKKLCYKGSTF |
| XP_008847678 | DRPQCHFDIEINREPVGRI MFQLFSDICPKTKCNFLCLCSGEKGLGKTTGKKLCYKGSTF |
| XP_015344914 | DRPQCHFDIEINREPVGRI MFQLFSDICPKTKCNFLCLCSGEKGLGKTTGKKLCYKGSTF |
| XP_008847677 | DRPQCHFDIEINREPVGRI MFQLFSDICPKTKCNFLCLCSGEKGLGKTTGKKLCYKGSTF |
| XP_005337989 | DRPQCHFDIEINREPVGRI MFQLFSDICPKTKCNFLCLCSGEKGLGKTTGKKLCYKGSTF |
| XP_021590709 | DRPQCHFDIEINREPVGRI MFQLFSDICPKTKCNFLCLCSGEKGLGKTTGKKLCYKGSTF |
| XP_022409522 | DRPQCHFDIEINREPVGRI MFQLFSDICPKTKCNFLCLCSGEKGLGKTTGKKLCYKGSTF |
| XP_021590708 | DRPQCHFDIEINREPVGRI MFQLFSDICPKTKCNFLCLCSGEKGLGKTTGKKLCYKGSTF |
| XP_021027182 | DRPQCHFDIEINREPVGRI MFQLFSDICPKTKCNFLCLCSGEKGLGKTTGKKLCYKGSTF |
| XP_006914886 | DRPQCHFDIEINREPVGRI MFQLFSDICPKTKCNFLCLCSGEKGLGKTTGKKLCYKGSTF |
| XP_011355685 | DRPQCHFDIEINREPVGRI MFQLFSDICPKTKCNFLCLCSGEKGLGKTTGKKLCYKGSTF |
| XP_023384828 | DRPQCHFDIEINREPVGRI MFQLFSDICPKTKCNFLCLCSGEKGLGKTTGKKLCYKGSTF |
| XP_006914885 | DRPQCHFDIEINREPVGRI MFQLFSDICPKTKCNFLCLCSGEKGLGKTTGKKLCYKGSTF |
| XP_012663507 | DRPQCHFDIEINREPVGRI MFQLFSDICPKTKCNFLCLCSGEKGLGKTTGKKLCYKGSTF |
| XP_012663506 | DRPQCHFDIEINREPVGRI MFQLFSDICPKTKCNFLCLCSGEKGLGKTTGKKLCYKGSTF |
| XP_017497113 | DRPQCHFDIEINREPVGRI MFQLFSDICPKTKCNFLCLCSGEKGLGKTTGKKLCYKGSTF |
| XP_016051563 | DRPQCHFDIEINREPVGRI MFQLFSDICPKTKCNFLCLCSGEKGLGKTTGKKLCYKGSTF |
| XP_017497111 | DRPQCHFDIEINREPVGRI MFQLFSDICPKTKCNFLCLCSGEKGLGKTTGKKLCYKGSTF |
| XP_017497110 | DRPQCHFDIEINREPVGRI MFQLFSDICPKTKCNFLCLCSGEKGLGKTTGKKLCYKGSTF |
| XP_012315529 | DRPQCHFDIEINREPVGRI MFQLFSDICPKTKCNFLCLCSGEKGLGKTTGKKLCYKGSTF |
| XP_020728074 | DRPQCHFDIEINREPVGRI MFQLFSDICPKTKCNFLCLCSGEKGLGKTTGKKLCYKGSTF |
| XP_012315528 | DRPQCHFDIEINREPVGRI MFQLFSDICPKTKCNFLCLCSGEKGLGKTTGKKLCYKGSTF |
| XP_020728073 | DRPQCHFDIEINREPVGRI MFQLFSDICPKTKCNFLCLCSGEKGLGKTTGKKLCYKGSTF |
| XP_021062319 | DRPQCHFDIEINREPVGRI MFQLFSDICPKTKCNFLCLCSGEKGLGKTTGKKLCYKGSTF |
| XP_021027181 | DRPQCHFDIEINREPVGRI MFQLFSDICPKTKCNFLCLCSGEKGLGKTTGKKLCYKGSTF |
| XP_021027180 | DRPQCHFDIEINREPVGRI MFQLFSDICPKTKCNFLCLCSGEKGLGKTTGKKLCYKGSTF |
| XP_004835151 | DRPQCHFDIEINREPVGRI MFQLFSDICPKTKCNFLCLCSGEKGLGKTTGKKLCYKGSTF |
| XP_012928271 | DRPQCHFDIEINREPVGRI MFQLFSDICPKTKCNFLCLCSGEKGLGKTTGKKLCYKGSTF |
| XP_021590705 | DRPQCHFDIEINREPVGRI MFQLFSDICPKTKCNFLCLCSGEKGLGKTTGKKLCYKGSTF |
| XP_011241241 | DRPQCHFDIEINREPVGRI MFQLFSDICPKTKCNFLCLCSGEKGLGKTTGKKLCYKGSTF |
| NP_035048    | DRPQCHFDIEINREPVGRI MFQLFSDICPKTKCNFLCLCSGEKGLGKTTGKKLCYKGSTF |

XP\_017168694 DRPQCHFDIEINREPVGRI MFQLFSDICPKTKCNFLCLCSGEKGLGKTTGKKLCYKGSTF  
XP\_005348185 DRPQCHFDIEINREPVGRI MFQLFSDICPKTKCNFLCLCSGEKGLGKTTGKKLCYKGSTF  
XP\_005082370 DRPQCHFDIEINREPVGRI MFQLFSDICPKTKCNFLCLCSGEKGLGKTTGKKLCYKGSTF  
XP\_021503066 DRPQCHFDIEINREPVGRI MFQLFSDICPKTKCNFLCLCSGEKGLGKTTGKKLCYKGSTF  
XP\_021503065 DRPQCHFDIEINREPVGRI MFQLFSDICPKTKCNFLCLCSGEKGLGKTTGKKLCYKGSTF  
XP\_021503062 DRPQCHFDIEINREPVGRI MFQLFSDICPKTKCNFLCLCSGEKGLGKTTGKKLCYKGSTF  
XP\_021503063 DRPQCHFDIEINREPVGRI MFQLFSDICPKTKCNFLCLCSGEKGLGKTTGKKLCYKGSTF  
XP\_008568057 DRPQCHFDIEINREPVGRI MFQLFSDICPKTKCNFLCLCSGEKGLGKTTGKKLCYKGSTF  
XP\_008568056 DRPQCHFDIEINREPVGRI MFQLFSDICPKTKCNFLCLCSGEKGLGKTTGKKLCYKGSTF  
XP\_006120664 DRPQCFFDIEINREPVGRI MFQLFSDVCPKTKCNFLCLCSGEKGIGKTTGKKLCYKGSTF  
XP\_007055629 DRPQCFFDIEINREPVGRI MFQLFSDVCPKTKCNFLCLCSGEKGIGKTTGKKLCYKGSTF  
XP\_006120661 DRPQCFFDIEINREPVGRI MFQLFSDVCPKTKCNFLCLCSGEKGIGKTTGKKLCYKGSTF  
XP\_006120659 DRPQCFFDIEINREPVGRI MFQLFSDVCPKTKCNFLCLCSGEKGIGKTTGKKLCYKGSTF  
XP\_007106819 DRPQCHFDIEINREPVGRI MFQLFSDICPKTKCNFLCLCSGEKGLGKTTGKKLCYKGSTF  
XP\_015708506 DRPQCYFDIEINREPVGRI MFQLFSDICPKTKCNFLCLCSGEKGIGKTTGKKLCYKGSTF  
XP\_009682494 DRPQCFFDIEINREPVGRI MFQLFSDICPKTKCNFLCLCSGEKGLGKTTGKKLCYKGSTF  
XP\_009682493 DRPQCFFDIEINREPVGRI MFQLFSDICPKTKCNFLCLCSGEKGLGKTTGKKLCYKGSTF  
XP\_009682492 DRPQCFFDIEINREPVGRI MFQLFSDICPKTKCNFLCLCSGEKGLGKTTGKKLCYKGSTF  
XP\_009682491 DRPQCFFDIEINREPVGRI MFQLFSDICPKTKCNFLCLCSGEKGLGKTTGKKLCYKGSTF  
XP\_019471734 DRPQCFFDIEINREPVGRI MFQLFSDICPKTKCNFLCLCSGEKGIGKTTGKKLCYKGSTF  
XP\_010710549 DRPQCFFDIEINREPVGRI MFQLFSDICPKTKCNFLCLCSGEKGIGKTTGKKLCYKGSTF  
XP\_010710548 DRPQCFFDIEINREPVGRI MFQLFSDICPKTKCNFLCLCSGEKGIGKTTGKKLCYKGSTF  
XP\_015136632 DRPQCFFDIEINREPVGRI MFQLFSDICPKTKCNFLCLCSGEKGLGKTTGKKLCYKGSTF  
XP\_004939132 DRPQCFFDIEINREPVGRI MFQLFSDICPKTKCNFLCLCSGEKGIGKTTGKKLCYKGSTF  
XP\_004939131 DRPQCFFDIEINREPVGRI MFQLFSDICPKTKCNFLCLCSGEKGIGKTTGKKLCYKGSTF  
XP\_013795593 DRPQCFFDIEINREPVGRI MFQLFSDICPKTKCNFLCLCSGEKGIGKTTGKKLCYKGSTF  
XP\_019363610 DRPQCFFDIEINREPVGRI MFQLFSDICPKTKCNFLCLCSGEKGIGKTTGKKLCYKGSTF  
XP\_014376468 DRPQCFFDIEINREPVGRI MFQLFSDICPKTKCNFLCLCSGEKGIGKTTGKKLCYKGSTF  
XP\_007659513 DRPQCHFDIEINREPVGRI MFQLFSDICPKTKCNFLSLCSGERGLGKTTGKKLCYKGSTF  
XP\_021241246 DRPQCFFDIEINREPVGRI MFQLFSDICPKTKCNFLCLCSGEKGIGKTTGKKLCYKGSTF  
XP\_021241236 DRPQCFFDIEINREPVGRI MFQLFSDICPKTKCNFLCLCSGEKGIGKTTGKKLCYKGSTF  
XP\_021241235 DRPQCFFDIEINREPVGRI MFQLFSDICPKTKCNFLCLCSGEKGIGKTTGKKLCYKGSTF  
XP\_017731869 DRPQCHFDIEINREPVGRI MFQLFSDICPKXMQNFLCLCSGEKGLGKTTGKKLCYKGSTF  
XP\_012426793 DRPQCFFEIEINREPVGRI MFQLFSDICPKTKCNFLCLCSGEKGIGKTTGKKLCYKGSTF  
XP\_017944741 DRPQCFFEIEINREPVGRI MFQLFSDICPKTKCNFLCLCSGEKGIGKTTGKKLCYKGSTF  
XP\_017944740 DRPQCFFEIEINREPVGRI MFQLFSDICPKTKCNFLCLCSGEKGIGKTTGKKLCYKGSTF  
XP\_010393085 DRPQCFFEIEINREPVGRI MFQLFSDICPKTKCNFLCLCSGEKGIGKTTGKKLCYKGSTF  
XP\_017685518 DRPQCFFEIEINREPVGRI MFQLFSDICPKTKCNFLCLCSGEKGIGKTTGKKLCYKGSTF  
XP\_017602246 DRPQCFFEIEINREPVGRI MFQLFSDICPKTKCNFLCLCSGEKGIGKTTGKKLCYKGSTF  
XP\_016151723 DRPQCFFEIEINREPVGRI MFQLFSDICPKTKCNFLCLCSGEKGIGKTTGKKLCYKGSTF  
XP\_019138709 DRPQCFFEIEINREPVGRI MFQLFSDICPKTKCNFLCLCSGEKGIGKTTGKKLCYKGSTF  
XP\_017685517 DRPQCFFEIEINREPVGRI MFQLFSDICPKTKCNFLCLCSGEKGIGKTTGKKLCYKGSTF  
XP\_017602245 DRPQCFFEIEINREPVGRI MFQLFSDICPKTKCNFLCLCSGEKGIGKTTGKKLCYKGSTF  
XP\_005040539 DRPQCFFEIEINREPVGRI MFQLFSDICPKTKCNFLCLCSGEKGIGKTTGKKLCYKGSTF  
XP\_005040538 DRPQCFFEIEINREPVGRI MFQLFSDICPKTKCNFLCLCSGEKGIGKTTGKKLCYKGSTF  
XP\_005040537 DRPQCFFEIEINREPVGRI MFQLFSDICPKTKCNFLCLCSGEKGIGKTTGKKLCYKGSTF  
XP\_014800495 DRPQCFFEIEINREPVGRI MFQLFSDICPKTKCNFLCLCSGEKGIGKTTGKKLCYKGSTF  
XP\_008168983 DRPQCFFDIEINREPVGRI MFQLFSDVCPKTKCNFLCLCSGEKGIGKTTGKKLCYKGSTF  
XP\_017944739 DRPQCFFEIEINREPVGRI MFQLFSDICPKTKCNFLCLCSGEKGIGKTTGKKLCYKGSTF  
XP\_014729203 DRPQCFFEIEINREPVGRI MFQLFSDICPKTKCNFLCLCSGEKGIGKTTGKKLCYKGSTF  
XP\_017944736 DRPQCFFEIEINREPVGRI MFQLFSDICPKTKCNFLCLCSGEKGIGKTTGKKLCYKGSTF  
XP\_014729201 DRPQCFFEIEINREPVGRI MFQLFSDICPKTKCNFLCLCSGEKGIGKTTGKKLCYKGSTF  
XP\_010393084 DRPQCFFEIEINREPVGRI MFQLFSDICPKTKCNFLCLCSGEKGIGKTTGKKLCYKGSTF  
XP\_017944735 DRPQCFFEIEINREPVGRI MFQLFSDICPKTKCNFLCLCSGEKGIGKTTGKKLCYKGSTF  
XP\_017685520 DRPQCFFEIEINREPVGRI MFQLFSDICPKTKCNFLCLCSGEKGIGKTTGKKLCYKGSTF  
XP\_017602244 DRPQCFFEIEINREPVGRI MFQLFSDICPKTKCNFLCLCSGEKGIGKTTGKKLCYKGSTF  
XP\_014729200 DRPQCFFEIEINREPVGRI MFQLFSDICPKTKCNFLCLCSGEKGIGKTTGKKLCYKGSTF  
XP\_010393082 DRPQCFFEIEINREPVGRI MFQLFSDICPKTKCNFLCLCSGEKGIGKTTGKKLCYKGSTF

XP\_017685515 DRPQCFFEIEINREPVGRI MFQLFSDICPKTKCNFLCLCSGEKGIGKTTGKKLCYKGTTF  
XP\_017602242 DRPQCFFEIEINREPVGRI MFQLFSDICPKTKCNFLCLCSGEKGIGKTTGKKLCYKGTTF  
XP\_017602241 DRPQCFFEIEINREPVGRI MFQLFSDICPKTKCNFLCLCSGEKGIGKTTGKKLCYKGTTF  
KFP58102  
XP\_010393081 DRPQCFFEIEINREPVGRI MFQLFSDICPKTKCNFLCLCSGEKGIGKTTGKKLCYKGTTF  
XP\_017685514 DRPQCFFEIEINREPVGRI MFQLFSDICPKTKCNFLCLCSGEKGIGKTTGKKLCYKGTTF  
XP\_017602240 DRPQCFFEIEINREPVGRI MFQLFSDICPKTKCNFLCLCSGEKGIGKTTGKKLCYKGTTF  
XP\_010559721 DRPQCFFEIEINREPVGRI MFQLFSDICPKTKCNFLCLCSGEKGIGKTTGKKLCYKGTTF  
XP\_014800494 DRPQCFFEIEINREPVGRI MFQLFSDICPKTKCNFLCLCSGEKGIGKTTGKKLCYKGTTF  
XP\_011571332 DRPQCFFEIEINREPVGRI MFQLFSDICPKTKCNFLCLCSGEKGIGKTTGKKLCYKGTTF  
XP\_010559712 DRPQCFFEIEINREPVGRI MFQLFSDICPKTKCNFLCLCSGEKGIGKTTGKKLCYKGTTF  
XP\_009331567 DRPQCFFEIEINREPVGRI MFQLFSDICPKTKCNFLCLCSGEKGIGKTTGKKLCYKGTTF  
XP\_008492672 DRPQCFFEIEINREPVGRI MFQLFSDICPKTKCNFLCLCSGEKGIGKTTGKKLCYKGTTF  
XP\_014800492 DRPQCFFEIEINREPVGRI MFQLFSDICPKTKCNFLCLCSGEKGIGKTTGKKLCYKGTTF  
XP\_011571324 DRPQCFFEIEINREPVGRI MFQLFSDICPKTKCNFLCLCSGEKGIGKTTGKKLCYKGTTF  
XP\_009697766 DRPQCFFEIEINREPVGRI MFQLFSDICPKTKCNFLCLCSGEKGIGKTTGKKLCYKGTTF  
XP\_009331566 DRPQCFFEIEINREPVGRI MFQLFSDICPKTKCNFLCLCSGEKGIGKTTGKKLCYKGTTF  
XP\_009274213 DRPQCFFEIEINREPVGRI MFQLFSDICPKTKCNFLCLCSGEKGIGKTTGKKLCYKGTTF  
XP\_014800491 DRPQCFFEIEINREPVGRI MFQLFSDICPKTKCNFLCLCSGEKGIGKTTGKKLCYKGTTF  
XP\_010301634 DRPQCFFEIEINREPVGRI MFQLFSDICPKTKCNFLCLCSGEKGIGKTTGKKLCYKGTTF  
XP\_008168980 DRPQCFFDIEINREPVGRI MFQLFSDVCPKTKCNFLCLCSGEKGIGKTTGKKLCYKGSTF  
XP\_023963187 DRPQCFFDIEINREPVGRI MFQLFSDVCPKTKCNFLCLCSGEKGIGKTTGKKLCYKGSTF  
XP\_005150066 DRPQCFFEIEINREPVGRI MFQLFSDICPKTKCNFLCLCSGEKGIGKTTGKKLCYKGTTF  
XP\_009473612 DRPQCFFEIEINREPVGRI MFQLFSDICPKTKCNFLCLCSGEKGIGKTTGKKLCYKGTTF  
XP\_021393646 DRPQCFFEIEINREPVGRI MFQLFSDICPKTKCNFLCLCSGEKGIGKTTGKKLCYKGTTF  
XP\_021393642 DRPQCFFEIEINREPVGRI MFQLFSDICPKTKCNFLCLCSGEKGIGKTTGKKLCYKGTTF  
XP\_021393643 DRPQCFFEIEINREPVGRI MFQLFSDICPKTKCNFLCLCSGEKGIGKTTGKKLCYKGTTF  
XP\_009878793 DRPQCFFEIEINREPVGRI MFQLFSDICPKTKCNFLCLCSGEKGIGKTTGKKLCYKGTTF  
XP\_021393641 DRPQCFFEIEINREPVGRI MFQLFSDICPKTKCNFLCLCSGEKGIGKTTGKKLCYKGTTF  
XP\_018764676 DRPQCFFEIEINREPVGRI MFQLFSDICPKTKCNFLCLCSGEKGIGKTTGKKLCYKGTTF  
XP\_018764674 DRPQCFFEIEINREPVGRI MFQLFSDICPKTKCNFLCLCSGEKGIGKTTGKKLCYKGTTF  
XP\_018764673 DRPQCFFEIEINREPVGRI MFQLFSDICPKTKCNFLCLCSGEKGIGKTTGKKLCYKGTTF  
KFV02250  
XP\_014125627 DRPQCFFEIEINREPVGRI MFQLFSDICPKTKCNFLCLCSGEKGIGKTTGKKLCYKGTTF  
XP\_010083448 DRPQCFFEIEINREPVGRI MFQLFSDICPKTKCNFLCLCSGEKGIGKTTGKKLCYKGTTF  
XP\_014125626 DRPQCFFEIEINREPVGRI MFQLFSDICPKTKCNFLCLCSGEKGIGKTTGKKLCYKGTTF  
XP\_014112250 DRPQCFFEIEINREPVGRI MFQLFSDICPKTKCNFLCLCSGEKGIGKTTGKKLCYKGTTF  
XP\_014112249 DRPQCFFEIEINREPVGRI MFQLFSDICPKTKCNFLCLCSGEKGIGKTTGKKLCYKGTTF  
XP\_014125625 DRPQCFFEIEINREPVGRI MFQLFSDICPKTKCNFLCLCSGEKGIGKTTGKKLCYKGTTF  
XP\_014112248 DRPQCFFEIEINREPVGRI MFQLFSDICPKTKCNFLCLCSGEKGIGKTTGKKLCYKGTTF  
XP\_005428264 DRPQCFFEIEINREPVGRI MFQLFSDICPKTKCNFLCLCSGEKGIGKTTGKKLCYKGTTF  
XP\_015474510 DRPQCFFEIEINREPVGRI MFQLFSDICPKTKCNFLCLCSGEKGIGKTTGKKLCYKGTTF  
XP\_023777798 DRPQCFFEIEINREPVGRI MFQLFSDICPKTKCNFLCLCSGEKGIGKTTGKKLCYKGTTF  
XP\_015474508 DRPQCFFEIEINREPVGRI MFQLFSDICPKTKCNFLCLCSGEKGIGKTTGKKLCYKGTTF  
XP\_023777797 DRPQCFFEIEINREPVGRI MFQLFSDICPKTKCNFLCLCSGEKGIGKTTGKKLCYKGTTF  
XP\_023777796 DRPQCFFEIEINREPVGRI MFQLFSDICPKTKCNFLCLCSGEKGIGKTTGKKLCYKGTTF  
XP\_015474507 DRPQCFFEIEINREPVGRI MFQLFSDICPKTKCNFLCLCSGEKGIGKTTGKKLCYKGTTF  
XP\_023777795 DRPQCFFEIEINREPVGRI MFQLFSDICPKTKCNFLCLCSGEKGIGKTTGKKLCYKGTTF  
KFQ42818  
XP\_019355067 DRPQCFFDIEINREPVGRI MFQLFSDICPKTKCNFLCLCSGEKGIGKTTGKKLCYKGTTF  
XP\_010014722 DRPQCFFEIEINREPVGRI MFQLFSDICPKTKCNFLCLCSGEKGIGKTTGKKLCYKGTTF  
XP\_009556564 DRPQCFFEIEINREPVGRI MFQLFSDVCPKTKCNFLCLCSGEKGIGKTTGKKLCYKGTTF  
XP\_009993002 DRPQCFFEIEINREPVGRI MFQLFSDICPKTKCNFLCLCSGEKGIGKTTGKKLCYKGTTF  
XP\_009896433 DRPQCFFEIEINREPVGRI MFQLFSDICPKTKCNFLCLCSGEKGIGKTTGKKLCYKGTTF  
XP\_010213065 DRPQCFFDIEINREPVGRI MFQLFSDICPKTKCNFLCLCSGEKGIGKTTGKKLYYKGTTF  
XP\_019384731 DRPQCFFDIEINREPVGRI MFQLFSDICPKTKCNFLCLCSGEKGIGKTTGKKLYYKGTTF  
XP\_008110438 DRPQCFFDIEINREPVGRI VFQLFSDVCPRTCKNFLCLCSGEKGIGKTTGKKLCYKGSTF  
XP\_008110436 DRPQCFFDIEINREPVGRI VFQLFSDVCPRTCKNFLCLCSGEKGIGKTTGKKLCYKGSTF

XP\_015264278 DRPQCFFDIEINREPVGRIIFQLFSDVCPRTCKNFLCLCTGEKGIGKTTGKKLCYEGSTF  
XP\_013917336 DRPQCFFDIEINREPVGRIIFQLFSDVCPRTCKNFLCLCTGEKGIGKTTGKKLCYKGSTF  
XP\_020670421 DRPQCFFDIEINREPVGRIIFQLFSDVCPRTCKNFLSLCTGENGIGKTTGKKLCYKGSTF  
XP\_020670420 DRPQCFFDIEINREPVGRIIFQLFSDVCPRTCKNFLSLCTGENGIGKTTGKKLCYKGSTF  
XP\_015667896 DRPQCFFDIEINREPVGRIIFQLFSDVCPRTCKNFLCLCTGEKGIGKTTGKKLCYKGSTF  
XP\_007443413 DRPQCFFDIEINREPVGRIIFQLFSDVCPRTCKNFLCLCTGEKGIGKTTGKKLWYKGSTF  
XP\_007443411 DRPQCFFDIEINREPVGRIIFQLFSDVCPRTCKNFLCLCTGEKGIGKTTGKKLWYKGSTF  
XP\_017451684 DRPQCHFDIEINGSPVGRIMFSSSQTYVPKTCCKNFLCLCSGEKGLGKTTGKKLCYKGSTF  
XP\_014918330 -PAEVPLDIEINREPVGRIIFQLFSDICPKTCCKNFLCLCSGEKGLGKTTGKKLCYKGSTF  
XP\_002939352 ARPQCYFDVEINREPVGRIIFQLFSDVCPKTCMNFLCLCTGEKGIGKVTGKKLCYKGSTF  
XP\_018124467 ARPQCYFDVEINREPIGRIVFQLFSDVCPKTCMNFLCLCTGEKGIGKVTGKKLCYKGSTF  
XP\_017572959 DRPQCYFDVEINREPVGRIIFQLFSDVCPKTSKNFLCLCTGEKDTGKTTGKKLCYKGSTF  
XP\_018607018 DRPQCYFDVEVNREPVGRIIFQLFSDICPKTSKNFLCLCTGEKGTGKTTGKYLKYKGSTF  
XP\_018607016 DRPQCYFDVEVNREPVGRIIFQLFSDICPKTSKNFLCLCTGEKGTGKTTGKYLKYKGSTF  
XP\_007544596 DRPQCYFDVELNREPVGRIIFQLFSDVCPKTSKNFLCLCTGEKGTGKVTRKKLCYKGSTF  
XP\_018607022 DRPQCYFDVEVNREPVGRIIFQLFSDICPKTSKNFLCLCTGEKGTGKTTGKYLKYKGSTF  
XP\_009443552 DRPQCHFDIEINREPVGRIIFQLFSDICPKTCCKNFLCLCSGEKGLGKTTGKKLCYKGSTF  
PNJ74568 DRPQCHFDIEINREPVGRIIFQLFSDICPKTCCKNFLCLCSGEKGLGKTTGKKLCYKGSTF  
PNJ74566 DRPQCHFDIEINREPVGRIIFQLFSDICPKTCCKNFLCLCSGEKGLGKTTGKKLCYKGSTF  
XP\_018122561 ARPQCYFNVEVNREPVGRIIFQLFSDVCPETCMNFLCLCTGEKGIGKVTGKKLCYKGSTF  
XP\_012735608 DRPQCYFDVELNREPVGRIIFQLFSDVCPKTSKNFLCLCTGEKGTGKVTGKKLCYKGSTF  
XP\_022065410 DRPQCYFDVELNREPVGRIIFQLFSDVCPKTSKNFLCLCTGERGIGKITGKKLCYKGSTF  
XP\_023122049 DRPQCYFDVELNREPVGRIIFQLFSDVCPKTSKNFLCLCTGERGIGKITGKKLCYKGSTF  
XP\_022065408 DRPQCYFDVELNREPVGRIIFQLFSDVCPKTSKNFLCLCTGERGIGKITGKKLCYKGSTF  
XP\_023122045 DRPQCYFDVELNREPVGRIIFQLFSDVCPKTSKNFLCLCTGERGIGKITGKKLCYKGSTF  
XP\_022065407 DRPQCYFDVELNREPVGRIIFQLFSDVCPKTSKNFLCLCTGERGIGKITGKKLCYKGSTF  
XP\_022065406 DRPQCYFDVELNREPVGRIIFQLFSDVCPKTSKNFLCLCTGERGIGKITGKKLCYKGSTF  
XP\_023122044 DRPQCYFDVELNREPVGRIIFQLFSDVCPKTSKNFLCLCTGERGIGKITGKKLCYKGSTF  
XP\_022065405 DRPQCYFDVELNREPVGRIIFQLFSDVCPKTSKNFLCLCTGERGIGKITGKKLCYKGSTF  
XP\_023122043 DRPQCYFDVELNREPVGRIIFQLFSDVCPKTSKNFLCLCTGERGIGKITGKKLCYKGSTF  
XP\_018414151 ARPQCYFDVEINRDPVGRIIFQLFSDVCPKTCMNFLSLCTGEKGIGKVTGKKLWYKGSTF  
XP\_023490562 -MCFIS-----VGRIMFQLFSDICPKTCCKNFLCLCSGEKGLGKTTGKKLCYKGSTF  
XP\_008304546 DRPQCYFDVELNREPVGRIIFQLFSDICPKTSKNFLCLCTGERGTGKITGKKLCYKGSTF  
KKF16876 DRPQCYFDVELNREPVGRIIFQLFSDICPKTSKNFLCLCTGEKGTGKITGKKLCYKGSTF  
XP\_008304545 DRPQCYFDVELNREPVGRIIFQLFSDICPKTSKNFLCLCTGERGTGKITGKKLCYKGSTF  
XP\_015249666 DRPQCYFDVELNREPVGRIIFQLFSDVCPKTSKNFLCLCTGEKGTGKVTGKKLCYKGSTF  
XP\_018529332 DRPQCYFDVELNREPVGRIIFQLFSDVCPKTSKNFLCLCTGEKGTGKITGKKLCYKGSTF  
XP\_018529331 DRPQCYFDVELNREPVGRIIFQLFSDVCPKTSKNFLCLCTGEKGTGKITGKKLCYKGSTF  
XP\_010751380 DRPQCYFDVELNREPVGRIIFQLFSDICPKTSKNFLCLCTGEKGTGKITGKKLCYKGSTF  
XP\_010751371 DRPQCYFDVELNREPVGRIIFQLFSDICPKTSKNFLCLCTGEKGTGKITGKKLCYKGSTF  
XP\_019745550 DRPQCYFDVELNREPVGRIIFQLFSDICPKTSKNFLCLCTGEKGAGKITGKKLCYKGSTF  
XP\_010751365 DRPQCYFDVELNREPVGRIIFQLFSDICPKTSKNFLCLCTGEKGTGKITGKKLCYKGSTF  
XP\_019745545 DRPQCYFDVELNREPVGRIIFQLFSDICPKTSKNFLCLCTGEKGAGKITGKKLCYKGSTF  
XP\_023263705 DRPQCYFDVELNREPVGRIIFQLFSDVCPKTSKNFLCLCTGEKGTGKITGKKLCYKGSTF  
XP\_023263706 DRPQCYFDVELNREPVGRIIFQLFSDVCPKTSKNFLCLCTGEKGTGKITGKKLCYKGSTF  
XP\_001338072 DRPQCYFDVEINREPVGRIIFQLFSDICPKTSKNFLCLCTGEKSGKATGKKLCYKGSTF  
XP\_022599954 DRPQCYFDVELNREPVGRIIFQLFSDVCPKTSKNFLCLCTGEKGTGKITGKKLCYKGSTF  
XP\_019897364 ERPQCYFDVEINREPVGRIIFQLFSDVCPKTSKNFLSLCTGDRGAGKTTGKKLCFKGSTF  
XP\_010900666 ERPQCYFDVEINREPVGRIIFQLFSDVCPKTSKNFLSLCTGDRGAGKTTGKKLCFKGSTF  
XP\_010900665 ERPQCYFDVEINREPVGRIIFQLFSDVCPKTSKNFLSLCTGDRGAGKTTGKKLCFKGSTF  
XP\_010900664 ERPQCYFDVEINREPVGRIIFQLFSDVCPKTSKNFLSLCTGDRGAGKTTGKKLCFKGSTF  
XP\_019897363 ERPQCYFDVEINREPVGRIIFQLFSDVCPKTSKNFLSLCTGDRGAGKTTGKKLCFKGSTF  
XP\_010167755 -----GRIMFQLFSDVCPKTCCKNFLCLCSGEKGIGKTTGKKLCYKGSTF  
XP\_010900668 ERPQCYFDVEINREPVGRIIFQLFSDVCPKTSKNFLSLCTGDRGAGKTTGKKLCFKGSTF  
XP\_016427080 DRPQCYFDVEVNREPVGRIIFQLFSDICPKTSKNFLCLCTGEKSSGKTTGKKLCYKGSTF  
XP\_016318510 DRPQCYFDVEINREPVGRIIFQLFSDICPKTSKNFLCLCTGEKSSGKTTGKKLCYKGSTF  
XP\_015209664 DRPQCYFDVEINREPVGRIIFQLFSDICPKTSKNFLCLCTGEKGTGKVTGKKLCYKGSTF  
XP\_015209662 DRPQCYFDVEINREPVGRIIFQLFSDICPKTSKNFLCLCTGEKGTGKVTGKKLCYKGSTF

XP\_015209665 DRPQCYFDVEINREPVGRIVFQLFSDICPKTSKNFLCLCTGEKGTGKVTRKKLCYKGSTF  
 XP\_005912346 DRPQCYFDVELNREPVGRIVFQLFSDICPKTSKNFLCLCTGERGTGKVTRKKLCYKGSTF  
 XP\_005722738 DRPQCYFDVELNREPVGRIVFQLFSDICPKTSKNFLCLCTGERGTGKVTRKKLCYKGSTF  
 XP\_020457914 DRPQCYFDVELNREPVGRIVFQLFSDVCPKTSKNFLSLCTGERGTGRITGKKLCYKGSTF  
 XP\_013132609 DRPQCYFDVELNREPVGRIVFQLFSDICPKTSKNFLCLCTGERGTGKVTRKKLCYKGSTF  
 XP\_004546791 DRPQCYFDVELNREPVGRIVFQLFSDICPKTSKNFLCLCTGERGTGKVTRKKLCYKGSTF  
 XP\_006795195 DRPQCYFDVELNREPVGRIVFQLFSDICPKTSKNFLCLCTGERGTGKVTRKKLCYKGSTF  
 XP\_005912345 DRPQCYFDVELNREPVGRIVFQLFSDICPKTSKNFLCLCTGERGTGKVTRKKLCYKGSTF  
 XP\_005722737 DRPQCYFDVELNREPVGRIVFQLFSDICPKTSKNFLCLCTGERGTGKVTRKKLCYKGSTF  
 XP\_021475699 ERPQCYFDVEINREPVGRIYQLFSDVCPKTSKNFLSLCTGERGTGKSTGKKLCFKGSTF  
 XP\_004546790 DRPQCYFDVELNREPVGRIVFQLFSDICPKTSKNFLCLCTGERGTGKVTRKKLCYKGSTF  
 XP\_003439241 DRPQCYFDVELNREPVGRIVFQLFSDICPKTSKNFLCLCTGERGTGKVTRKKLCYKGSTF  
 XP\_006795194 DRPQCYFDVELNREPVGRIVFQLFSDICPKTSKNFLCLCTGERGTGKVTRKKLCYKGSTF  
 XP\_023490560 -MCFIS-----VGRIMFQLFSDICPKTCKNFLCLCSGEKGLGKTTGKKLCYKGSTF  
 XP\_015209666 DRPQCYFDVEINREPVGRIVFQLFSDICPKTSKNFLCLCTGEKGTGKVTRKKLCYKGSTF  
 XP\_005797888 DRPQCYFDVELNREPVGRIVFQLFSDVCPKTSKNFLCLCTGEKGTGKVTRKKLCYKGSTF  
 CBN81984 DRPQCYFDVELNREPVGRIVFQLFSDVCPKTSKNFLSLCTGEKGTGKITGKKLCYKGSTF  
 XP\_010559731 DRPQCFFEIEINREPVGRIVFQLFSDICPKTCKNFLCLCSGEKGIGKTTGKKLCYKGSTF  
 XP\_007544415 DRPQCYFDVELNREPVGRIVFQLFSDVCPKTSKNFLCLCTGEKGTGKVTRKKLCYKGSTF  
 XP\_014870682 DRPQCYFDVELNREPVGRIVFQLFSDVCPKTSKNFLCLCTGEKGTGKVTRKKLCYKGSTF  
 XP\_011606242 DHPQCYFDVELNREPVGRIVFQLFSEICPKTCKNFLSLCTGERGSGKITGKKLCYKGSTF  
 CAG04245 DRPQCYFDVELNREPVGRIVFQLFSDICPKTCKNFLSLCTGERGSGKITGKKLCYKGSTF  
 XP\_016887118 DRPQCYFDVELNREPVGRIVFQLFSDICPKTSKNFLSLCTGERGVGKVTRKKLCFKGSTF  
 XP\_008306161 DRPQCYFDVELNREPVGRIVFQLFSDICPKTSKNFLSLCTGERGVGKVTRKKLCFKGSTF  
 XP\_008394441 DRPQCYFDVELNREPVGRIVFQLFSDVCPKTSKNFLCLCTGEKGTGKVTRKKLCYKGSTF  
 XP\_014825423 DRPQCYFDVELNREPVGRIVFQLFSDVCPKTSKNFLCLCTGEKGTGKVTRKKLCYKGSTF  
 XP\_012398954 -----MFQLFSDICPKTCKNFLCLCSGEKGLGKTTGKKLCYKGSTF  
 XP\_019063096 -----MFQLFSDICPKTCKNFLCLCSGEKGLGKTTGKKLCYKGSTF  
 XP\_009073803 -----GRIMFQLFSDICPKTCKNFLCLCSGEKGIGKTTGKKLCYKGSTF  
 XP\_016400109 DRPQCYFDVEINREPVGRIVCQLFSDVCPKTSKNFLCLCTGEKGSKTTGKNLCYKGSTF  
 XP\_016359192 DRPQCYFDVEINREPVGRIVCQLFSDVCPKTSKNFLCLCTGEKGSKTTGKHLCYKGSTF  
 XP\_004081327 DRPQCYFDVELNRDPVGRIVFQLYSDICPKTSKNFLCLCTGERGSGKVTRKKLCYKGSTF  
 XP\_020568300 DRPQCYFDVELNRDPVGRIVFQLYSDICPKTSKNFLCLCTGERGSGKVTRKKLCYKGSTF  
 XP\_016041020 MSGGET-----WHEEVGRIMFQLFSDICPKTCKNFLCLCSGEKGLGKTTGKKLCYKGSTF  
 XP\_017942181 -----MFQLFSDICPKTCKNFLCLCSGEKGIGKTTGKKLCYKGSTF  
 XP\_017942183 -----MFQLFSDICPKTCKNFLCLCSGEKGIGKTTGKKLCYKGSTF  
 XP\_017942182 -----MFQLFSDICPKTCKNFLCLCSGEKGIGKTTGKKLCYKGSTF  
 XP\_020501265 DRPQCYFDVELNREPVGRIVFQLFSDVCPKTSKNFLSLCTGEKGTGKITGKKLCYKGSTF  
 KFP01329 -----PVGRIMFQLFSDICPKTCKNFLCLCSGEKGIGKTTGKKLCYKGSTF  
 XP\_015856948 SPAGRSPALTGAVRPVGRIVFQLFSDICPKTCKNFLCLCSGEKGLGKTTGKKLCYKGSTF  
 XP\_020139631 -MLLDVRQCLSIIEELVGRIMFQLFSDICPKTCKNFLCLCSGEKGLGKTTGKKLCYKGSTF  
 XP\_020139628 -MLLDVRQCLSIIEELVGRIMFQLFSDICPKTCKNFLCLCSGEKGLGKTTGKKLCYKGSTF  
 XP\_006982975 SPAGRSPALTGAVRPVGRIVFQLFSDICPKTCKNFLCLCSGEKGLGKTTGKKLCYKGSTF  
 XP\_015856947 SPAGRSPALTGAVRPVGRIVFQLFSDICPKTCKNFLCLCSGEKGLGKTTGKKLCYKGSTF  
 XP\_014427753 -----PNGGSPVGRIVFQLFSDVCPKTSKNFLCLCSGEKGIGKTTGKKLCYKGSTF  
 XP\_013857648 DRPQCYFDVELNREPVGRIVFQLFSDICPRTSKNFLCLCTGEKGTGKITGKKLCYKGSTF  
 XP\_023656013 DRPQCYFDVEVNREPVGRIVFQLFSDICPKTSKNFLSLCTGEKGTGKITGKNLCYKGSTF  
 XP\_023656011 DRPQCYFDVEVNREPVGRIVFQLFSDICPKTSKNFLSLCTGEKGTGKITGKNLCYKGSTF  
 XP\_023656014 DRPQCYFDVEVNREPVGRIVFQLFSDICPKTSKNFLSLCTGEKGTGKITGKNLCYKGSTF  
 XP\_004448689 -MYFIS-----VGRIMFQLFSDICPKTCKNFLCLCSGEKGLGKTTGKKLCYKGSTF  
 XP\_004448688 -MYFIS-----VGRIMFQLFSDICPKTCKNFLCLCSGEKGLGKTTGKKLCYKGSTF  
 XP\_023476440 -MCFIS-----VGRIMFQLFSDICPKTCKNFLCLCSGEKGLGKTTGKKLCYKGSTF

: . . \* . \*\*\*.\*\*.\*:.. .: \* \* \* :\*:\*\*

NP\_005376 HRVVKNFMIQGGDFSEGNGKGGESIYGGYFK-----DENFILKHDRAFLLSMANRGKHTN  
 XP\_014646452 HRVVKNFMIQGGDFSEGNGKGGESIYGGYFK-----DENFILKHDRAFLLSMANRGKHTN  
 XP\_017657797 HRVVKNFMIQGGDFSEGNGKGGESIYGGYFK-----DENFILKHDRAFLLSMANRGKHTN  
 XP\_012885690 HRVVKNFMIQGGDFSEGNGKGGESIYGGYFK-----DENFILKHDRAFLLSMANRGKHTN



|              |                                                              |
|--------------|--------------------------------------------------------------|
| XP_008530969 | HRVVKNFMIQGGDFSEGNKGKGGESYGGYFK-----DENFILKHDRAFLLSMANRGKHTN |
| XP_015423871 | HRVVKNFMIQGGDFSEGNKGKGGESYGGYFK-----DENFILKHDRAFLLSMANRGKHTN |
| XP_015091833 | HRVVKNFMIQGGDFSEGNKGKGGESYGGYFK-----DENFILKHDRAFLLSMANRGKHTN |
| XP_010973060 | HRVVKNFMIQGGDFSEGNKGKGGESYGGYFK-----DENFILKHDRAFLLSMANRGKHTN |
| XP_019583096 | HRVVKNFMIQGGDFSEGNKGKGGESYGGYFK-----DENFILKHDRAFLLSMANRGKHTN |
| XP_011231111 | HRVVKNFMIQGGDFSEGNKGKGGESYGGYFK-----DENFILKHDRAFLLSMANRGKHTN |
| XP_014646457 | HRVVKNFMIQGGDFSEGNKGKGGESYGGYFK-----DENFILKHDRAFLLSMANRGKHTN |
| XP_023988069 | HRVVKNFMIQGGDFSEGNKGKGGESYGGYFK-----DENFILKHDRAFLLSMANRGKHTN |
| XP_008530970 | HRVVKNFMIQGGDFSEGNKGKGGESYGGYFK-----DENFILKHDRAFLLSMANRGKHTN |
| XP_017497119 | HRVVKNFMIQGGDFSEGNKGKGGESYGGYFK-----DENFILKHDRAFLLSMANRGKHTN |
| XP_021503072 | HRVVKNFMIQGGDFSEGNKGKGGESYGGYFK-----DENFILKHDRAFLLSMANRGKHTN |
| XP_021503071 | HRVVKNFMIQGGDFSEGNKGKGGESYGGYFK-----DENFILKHDRAFLLSMANRGKHTN |
| XP_020041828 | HRVVKNFMIQGGDFSEGNKGKGGESYGGYFK-----DENFILKHDRAFLLSMANRGKHTN |
| XP_021503070 | HRVVKNFMIQGGDFSEGNKGKGGESYGGYFK-----DENFILKHDRAFLLSMANRGKHTN |
| XP_012590780 | HRVVKNFMIQGGDFSEGNKGKGGESYGGYFK-----DENFILKHDRAFLLSMANRGKHTN |
| XP_019274390 | HRVVKNFMIQGGDFSEGNKGKGGESYGGYFK-----DENFILKHDRAFLLSMANRGKHTN |
| XP_019489071 | HRVVKNFMIQGGDFSEGNKGKGGESYGGYFK-----DENFILKHDRAFLLSMANRGKHTN |
| XP_019489063 | HRVVKNFMIQGGDFSEGNKGKGGESYGGYFK-----DENFILKHDRAFLLSMANRGKHTN |
| XP_010588206 | HRVVKNFMIQGGDFSEGNKGKGGESYGGYFK-----DENFILKHDRAFLLSMANRGKHTN |
| XP_023403600 | HRVVKNFMIQGGDFSEGNKGKGGESYGGYFK-----DENFILKHDRAFLLSMANRGKHTN |
| XP_009982730 | HRVVKNFMIQGGDFSEGNKGKGGESYGGYFK-----DENFILKHDRAFLLSMANRGKHTN |
| XP_019839655 | HRVVKNFMIQGGDFSEGNKGKGGESYGGYFK-----DENFILKHDRAFLLSMANRGKHTN |
| XP_006512034 | HRVVKNFMIQGGDFSEGNKGKGGESYGGYFK-----DENFILKHDRAFLLSMANRGKHTN |
| XP_024100264 | HRVVKNFMIQGGDFSEGNKGKGGESYGGYFK-----DENFILKHDRAFLLSMANRGKHTN |
| XP_019666422 | HRVVKNFMIQGGDFSEGNKGKGGESYGGYFK-----DENFILKHDRAFLLSMANRGKHTN |
| XP_008530962 | HRVVKNFMIQGGDFSEGNKGKGGESYGGYFK-----DENFILKHDRAFLLSMANRGKHTN |
| XP_008530967 | HRVVKNFMIQGGDFSEGNKGKGGESYGGYFK-----DENFILKHDRAFLLSMANRGKHTN |
| XP_010944204 | HRVVKNFMIQGGDFSEGNKGKGGESYGGYFK-----DENFILKHDRAFLLSMANRGKHTN |
| XP_015091830 | HRVVKNFMIQGGDFSEGNKGKGGESYGGYFK-----DENFILKHDRAFLLSMANRGKHTN |
| XP_014411884 | HRVVKNFMIQGGDFSEGNKGKGGESYGGYFK-----DENFILKHDRAFLLSMANRGKHTN |
| XP_010944201 | HRVVKNFMIQGGDFSEGNKGKGGESYGGYFK-----DENFILKHDRAFLLSMANRGKHTN |
| XP_009443554 | HRVVKNFMIQGGDFSEGNKGKGGESYGGYFK-----DENFILKHDRAFLLSMANRGKHTN |
| XP_021241242 | HRVVKNFMIQGGDFSEGNKGKGGESYGGYFK-----DENFILKHDRAFLLSMANRGKHTN |
| XP_020927360 | HRVVKNFMIQGGDFSEGNKGKGGESYGGYFK-----DENFILKHDRAFLLSMANRGKHTN |
| XP_004581770 | HRVVKNFMIQGGDFSEGNKGKGGESYGGYFK-----DENFILKHDRAFLLSMANRGKHTN |
| XP_005669469 | HRVVKNFMIQGGDFSEGNKGKGGESYGGYFK-----DENFILKHDRAFLLSMANRGKHTN |
| XP_009443555 | HRVVKNFMIQGGDFSEGNKGKGGESYGGYFK-----DENFILKHDRAFLLSMANRGKHTN |
| XP_005669468 | HRVVKNFMIQGGDFSEGNKGKGGESYGGYFK-----DENFILKHDRAFLLSMANRGKHTN |
| XP_008708042 | HRVVKNFMIQGGDFSEGNKGKGGESYGGYFK-----DENFILKHDRAFLLSMANRGKHTN |
| AAA37500     | HRVVKNFMIQGGDFSEGNKGKGGESYGGYFK-----DENFILKHDRAFLLSMANRGKHTN |
| XP_004676331 | HRVVKNFMIQGGDFSEGNKGKGGESYGGYFK-----DENFILKHDRAFLLSMANRGKHTN |
| XP_006748020 | HRVVKNFMIQGGDFSEGNKGKGGESYGGYFK-----DENFILKHDRAFLLSMANRGKHTN |
| XP_006770577 | HRVVKNFMIQGGDFSEGNKGKGGESYGGYFK-----DENFILKHDRAFLLSMANRGKHTN |
| XP_019583095 | HRVVKNFMIQGGDFSEGNKGKGGESYGGYFK-----DENFILKHDRAFLLSMANRGKHTN |
| XP_015423867 | HRVVKNFMIQGGDFSEGNKGKGGESYGGYFK-----DENFILKHDRAFLLSMANRGKHTN |
| XP_005383594 | HRVVKNFMIQGGDFSEGNKGKGGESYGGYFK-----DENFILKHDRAFLLSMANRGKHTN |
| XP_019583089 | HRVVKNFMIQGGDFSEGNKGKGGESYGGYFK-----DENFILKHDRAFLLSMANRGKHTN |
| XP_014445953 | HRVVKNFMIQGGDFSEGNKGKGGESYGGYFK-----DENFILKHDRAFLLSMANRGKHTN |
| XP_005891140 | HRVVKNFMIQGGDFSEGNKGKGGESYGGYFK-----DENFILKHDRAFLLSMANRGKHTN |
| XP_019489104 | HRVVKNFMIQGGDFSEGNKGKGGESYGGYFK-----DENFILKHDRAFLLSMANRGKHTN |
| XP_012004520 | HRVVKNFMIQGGDFSEGNKGKGGESYGGYFK-----DENFILKHDRAFLLSMANRGKHTN |
| XP_006051863 | HRVVKNFMIQGGDFSEGNKGKGGESYGGYFK-----DENFILKHDRAFLLSMANRGKHTN |
| XP_005954297 | HRVVKNFMIQGGDFSEGNKGKGGESYGGYFK-----DENFILKHDRAFLLSMANRGKHTN |
| XP_005695639 | HRVVKNFMIQGGDFSEGNKGKGGESYGGYFK-----DENFILKHDRAFLLSMANRGKHTN |
| XP_011954828 | HRVVKNFMIQGGDFSEGNKGKGGESYGGYFK-----DENFILKHDRAFLLSMANRGKHTN |
| XP_003992255 | HRVVKNFMIQGGDFSEGNKGKGGESYGGYFK-----DENFILKHDRAFLLSMANRGKHTN |
| XP_002702773 | HRVVKNFMIQGGDFSEGNKGKGGESYGGYFK-----DENFILKHDRAFLLSMANRGKHTN |
| XP_019666421 | HRVVKNFMIQGGDFSEGNKGKGGESYGGYFK-----DENFILKHDRAFLLSMANRGKHTN |

|              |                                                              |
|--------------|--------------------------------------------------------------|
| XP_019489077 | HRVVKNFMIQGGDFSEGNKGKGGESYGGYFK-----DENFILKHDRAFLLSMANRGKHTN |
| XP_012004518 | HRVVKNFMIQGGDFSEGNKGKGGESYGGYFK-----DENFILKHDRAFLLSMANRGKHTN |
| XP_011954826 | HRVVKNFMIQGGDFSEGNKGKGGESYGGYFK-----DENFILKHDRAFLLSMANRGKHTN |
| XP_006051860 | HRVVKNFMIQGGDFSEGNKGKGGESYGGYFK-----DENFILKHDRAFLLSMANRGKHTN |
| XP_005695638 | HRVVKNFMIQGGDFSEGNKGKGGESYGGYFK-----DENFILKHDRAFLLSMANRGKHTN |
| XP_005196454 | HRVVKNFMIQGGDFSEGNKGKGGESYGGYFK-----DENFILKHDRAFLLSMANRGKHTN |
| XP_851976    | HRVVKNFMIQGGDFSEGNKGKGGESYGGYFK-----DENFILKHDRAFLLSMANRGKHTN |
| XP_012520957 | HRVVKNFMIQGGDFSEGNKGKGGESYGGYFK-----DENFILKHDRAFLLSMANRGKHTN |
| XP_005634360 | HRVVKNFMIQGGDFSEGNKGKGGESYGGYFK-----DENFILKHDRAFLLSMANRGKHTN |
| XP_003132182 | HRVVKNFMIQGGDFSEGNKGKGGESYGGYFK-----DENFILKHDRAFLLSMANRGKHTN |
| XP_020139644 | HRVVKNFMIQGGDFSEGNKGKGGESYGGYFK-----DENFILKHDRAFLLSMANRGKHTN |
| XP_014715584 | HRVVKNFMIQGGDFSEGNKGKGGESYGGYFK-----DENFILKHDRAFLLSMANRGKHTN |
| XP_007193513 | HRVVKNFMIQGGDFSEGNKGKGGESYGGYFK-----DENFILKHDRAFLLSMANRGKHTN |
| XP_005669463 | HRVVKNFMIQGGDFSEGNKGKGGESYGGYFK-----DENFILKHDRAFLLSMANRGKHTN |
| XP_004419619 | HRVVKNFMIQGGDFSEGNKGKGGESYGGYFK-----DENFILKHDRAFLLSMANRGKHTN |
| XP_003363180 | HRVVKNFMIQGGDFSEGNKGKGGESYGGYFK-----DENFILKHDRAFLLSMANRGKHTN |
| XP_014986734 | HRVVKNFMIQGGDFSEGNKGKGGESYGGYFK-----DENFILKHDRAFLLSMANRGKHTN |
| XP_014715581 | HRVVKNFMIQGGDFSEGNKGKGGESYGGYFK-----DENFILKHDRAFLLSMANRGKHTN |
| XP_014646446 | HRVVKNFMIQGGDFSEGNKGKGGESYGGYFK-----DENFILKHDRAFLLSMANRGKHTN |
| XP_006893048 | HRVVKNFMIQGGDFSEGNKGKGGESYGGYFK-----DENFILKHDRAFLLSMANRGKHTN |
| XP_012625718 | HRVVKNFMIQGGDFSEGNKGKGGESYGGYFK-----DENFILKHDRAFLLSMANRGKHTN |
| XP_010973061 | HRVVKNFMIQGGDFSEGNKGKGGESYGGYFK-----DENFILKHDRAFLLSMANRGKHTN |
| XP_010944206 | HRVVKNFMIQGGDFSEGNKGKGGESYGGYFK-----DENFILKHDRAFLLSMANRGKHTN |
| XP_007193512 | HRVVKNFMIQGGDFSEGNKGKGGESYGGYFK-----DENFILKHDRAFLLSMANRGKHTN |
| XP_015091829 | HRVVKNFMIQGGDFSEGNKGKGGESYGGYFK-----DENFILKHDRAFLLSMANRGKHTN |
| XP_014411882 | HRVVKNFMIQGGDFSEGNKGKGGESYGGYFK-----DENFILKHDRAFLLSMANRGKHTN |
| XP_006770574 | HRVVKNFMIQGGDFSEGNKGKGGESYGGYFK-----DENFILKHDRAFLLSMANRGKHTN |
| XP_006770573 | HRVVKNFMIQGGDFSEGNKGKGGESYGGYFK-----DENFILKHDRAFLLSMANRGKHTN |
| XP_003809334 | HRVVKNFMIQGGDFSEGNKGKGGESYGGYFK-----DENFILKHDRAFLLSMANRGKHTN |
| ELK25111     | HRVVKNFMIQGGDFSEGNKGKGGESYGGYFK-----DENFILKHDRAFLLSMANRGKHTN |
| XP_023087260 | HRVVKNFMIQGGDFSEGNKGKGGESYGGYFK-----DENFILKHDRAFLLSMANRGKHTN |
| XP_005546833 | HRVVKNFMIQGGDFSEGNKGKGGESYGGYFK-----DENFILKHDRAFLLSMANRGKHTN |
| XP_008258471 | HRVVKNFMIQGGDFSEGNKGKGGESYGGYFK-----DENFILKHDRAFLLSMANRGKHTN |
| XP_008258470 | HRVVKNFMIQGGDFSEGNKGKGGESYGGYFK-----DENFILKHDRAFLLSMANRGKHTN |
| XP_004708608 | HRVVKNFMIQGGDFSEGNKGKGGESYGGYFK-----DENFILKHDRAFLLSMANRGKHTN |
| XP_003309783 | HRVVKNFMIQGGDFSEGNKGKGGESYGGYFK-----DENFILKHDRAFLLSMANRGKHTN |
| XP_009443557 | HRVVKNFMIQGGDFSEGNKGKGGESYGGYFK-----DENFILKHDRAFLLSMANRGKHTN |
| XP_011889503 | HRVVKNFMIQGGDFSEGNKGKGGESYGGYFK-----DENFILKHDRAFLLSMANRGKHTN |
| XP_019274386 | HRVVKNFMIQGGDFSEGNKGKGGESYGGYFK-----DENFILKHDRAFLLSMANRGKHTN |
| XP_015392541 | HRVVKNFMIQGGDFSEGNKGKGGESYGGYFK-----DENFILKHDRAFLLSMANRGKHTN |
| XP_021573498 | HRVVKNFMIQGGDFSEGNKGKGGESYGGYFK-----DENFILKHDRAFLLSMANRGKHTN |
| XP_017396461 | HRVVKNFMIQGGDFSEGNKGKGGESYGGYFK-----DENFILKHDRAFLLSMANRGKHTN |
| XP_005546834 | HRVVKNFMIQGGDFSEGNKGKGGESYGGYFK-----DENFILKHDRAFLLSMANRGKHTN |
| XP_014986732 | HRVVKNFMIQGGDFSEGNKGKGGESYGGYFK-----DENFILKHDRAFLLSMANRGKHTN |
| XP_018879079 | HRVVKNFMIQGGDFSEGNKGKGGESYGGYFK-----DENFILKHDRAFLLSMANRGKHTN |
| XP_014986735 | HRVVKNFMIQGGDFSEGNKGKGGESYGGYFK-----DENFILKHDRAFLLSMANRGKHTN |
| XP_009443553 | HRVVKNFMIQGGDFSEGNKGKGGESYGGYFK-----DENFILKHDRAFLLSMANRGKHTN |
| XP_016861963 | HRVVKNFMIQGGDFSEGNKGKGGESYGGYFK-----DENFILKHDRAFLLSMANRGKHTN |
| XP_011839703 | HRVVKNFMIQGGDFSEGNKGKGGESYGGYFK-----DENFILKHDRAFLLSMANRGKHTN |
| XP_006713234 | HRVVKNFMIQGGDFSEGNKGKGGESYGGYFK-----DENFILKHDRAFLLSMANRGKHTN |
| XP_017396460 | HRVVKNFMIQGGDFSEGNKGKGGESYGGYFK-----DENFILKHDRAFLLSMANRGKHTN |
| XP_018879080 | HRVVKNFMIQGGDFSEGNKGKGGESYGGYFK-----DENFILKHDRAFLLSMANRGKHTN |
| XP_010372621 | HRVVKNFMIQGGDFSEGNKGKGGESYGGYFK-----DENFILKHDRAFLLSMANRGKHTN |
| XP_007981992 | HRVVKNFMIQGGDFSEGNKGKGGESYGGYFK-----DENFILKHDRAFLLSMANRGKHTN |
| XP_009199351 | HRVVKNFMIQGGDFSEGNKGKGGESYGGYFK-----DENFILKHDRAFLLSMANRGKHTN |
| PNJ74565     | HRVVKNFMIQGGDFSEGNKGKGGESYGGYFK-----DENFILKHDRAFLLSMANRGKHTN |
| XP_023087259 | HRVVKNFMIQGGDFSEGNKGKGGESYGGYFK-----DENFILKHDRAFLLSMANRGKHTN |
| XP_009237437 | HRVVKNFMIQGGDFSEGNKGKGGESYGGYFK-----DENFILKHDRAFLLSMANRGKHTN |

|              |                                                              |
|--------------|--------------------------------------------------------------|
| XP_023087256 | HRVVKNFMIQGGDFSEGNKGKGGESYGGYFK-----DENFILKHDRAFLLSMANRGKHTN |
| XP_010372620 | HRVVKNFMIQGGDFSEGNKGKGGESYGGYFK-----DENFILKHDRAFLLSMANRGKHTN |
| XP_004414069 | HRVVKNFMIQGGDFSEGNKGKGGESYGGYFK-----DENFILKHDRAFLLSMANRGKHTN |
| XP_011231109 | HRVVKNFMIQGGDFSEGNKGKGGESYGGYFK-----DENFILKHDRAFLLSMANRGKHTN |
| XP_015392540 | HRVVKNFMIQGGDFSEGNKGKGGESYGGYFK-----DENFILKHDRAFLLSMANRGKHTN |
| XP_011231110 | HRVVKNFMIQGGDFSEGNKGKGGESYGGYFK-----DENFILKHDRAFLLSMANRGKHTN |
| XP_015392538 | HRVVKNFMIQGGDFSEGNKGKGGESYGGYFK-----DENFILKHDRAFLLSMANRGKHTN |
| XP_004754311 | HRVVKNFMIQGGDFSEGNKGKGGESYGGYFK-----DENFILKHDRAFLLSMANRGKHTN |
| XP_011806342 | HRVVKNFMIQGGDFSEGNKGKGGESYGGYFK-----DENFILKHDRAFLLSMANRGKHTN |
| XP_005546832 | HRVVKNFMIQGGDFSEGNKGKGGESYGGYFK-----DENFILKHDRAFLLSMANRGKHTN |
| XP_005546835 | HRVVKNFMIQGGDFSEGNKGKGGESYGGYFK-----DENFILKHDRAFLLSMANRGKHTN |
| XP_023384831 | HRVVKNFMIQGGDFSEGNKGKGGESYGGYFK-----DENFILKHDRAFLLSMANRGKHTN |
| XP_015447191 | HRVVKNFMIQGGDFSEGNKGKGGESYGGYFK-----DENFILKHDRAFLLSMANRGKHTN |
| XP_006868826 | HRVVKNFMIQGGDFSEGNKGKGGESYGGYFK-----DENFILKHDRAFLLSMANRGKHTN |
| XP_006102363 | HRVVKNFMIQGGDFSEGNKGKGGESYGGYFK-----DENFILKHDRAFLLSMANRGKHTN |
| XP_005860445 | HRVVKNFMIQGGDFSEGNKGKGGESYGGYFK-----DENFILKHDRAFLLSMANRGKHTN |
| XP_019274385 | HRVVKNFMIQGGDFSEGNKGKGGESYGGYFK-----DENFILKHDRAFLLSMANRGKHTN |
| XP_014323127 | HRVVKNFMIQGGDFSEGNKGKGGESYGGYFK-----DENFILKHDRAFLLSMANRGKHTN |
| XP_005860444 | HRVVKNFMIQGGDFSEGNKGKGGESYGGYFK-----DENFILKHDRAFLLSMANRGKHTN |
| XP_023988067 | HRVVKNFMIQGGDFSEGNKGKGGESYGGYFK-----DENFILKHDRAFLLSMANRGKHTN |
| XP_019274384 | HRVVKNFMIQGGDFSEGNKGKGGESYGGYFK-----DENFILKHDRAFLLSMANRGKHTN |
| XP_017396459 | HRVVKNFMIQGGDFSEGNKGKGGESYGGYFK-----DENFILKHDRAFLLSMANRGKHTN |
| XP_008152845 | HRVVKNFMIQGGDFSEGNKGKGGESYGGYFK-----DENFILKHDRAFLLSMANRGKHTN |
| NP_001336053 | HRVVKNFMIQGGDFSEGNKGKGGESYGGYFK-----DENFILKHDRAFLLSMANRGKHTN |
| XP_007106821 | HRVVKNFMIQGGDFSEGNKGKGGESYGGYFK-----DENFILKHDRAFLLSMANRGKHTN |
| XP_018879078 | HRVVKNFMIQGGDFSEGNKGKGGESYGGYFK-----DENFILKHDRAFLLSMANRGKHTN |
| XP_017396458 | HRVVKNFMIQGGDFSEGNKGKGGESYGGYFK-----DENFILKHDRAFLLSMANRGKHTN |
| XP_012315533 | HRVVKNFMIQGGDFSEGNKGKGGESYGGYFK-----DENFILKHDRAFLLSMANRGKHTN |
| XP_007981991 | HRVVKNFMIQGGDFSEGNKGKGGESYGGYFK-----DENFILKHDRAFLLSMANRGKHTN |
| XP_003256959 | HRVVKNFMIQGGDFSEGNKGKGGESYGGYFK-----DENFILKHDRAFLLSMANRGKHTN |
| XP_003735136 | HRVVKNFMIQGGDFSEGNKGKGGESYGGYFK-----DENFILKHDRAFLLSMANRGKHTN |
| XP_019802415 | HRVVKNFMIQGGDFSEGNKGKGGESYGGYFK-----DENFILKHDRAFLLSMANRGKHTN |
| XP_018879076 | HRVVKNFMIQGGDFSEGNKGKGGESYGGYFK-----DENFILKHDRAFLLSMANRGKHTN |
| XP_012315532 | HRVVKNFMIQGGDFSEGNKGKGGESYGGYFK-----DENFILKHDRAFLLSMANRGKHTN |
| XP_011737181 | HRVVKNFMIQGGDFSEGNKGKGGESYGGYFK-----DENFILKHDRAFLLSMANRGKHTN |
| XP_011889502 | HRVVKNFMIQGGDFSEGNKGKGGESYGGYFK-----DENFILKHDRAFLLSMANRGKHTN |
| XP_010372619 | HRVVKNFMIQGGDFSEGNKGKGGESYGGYFK-----DENFILKHDRAFLLSMANRGKHTN |
| XP_007981990 | HRVVKNFMIQGGDFSEGNKGKGGESYGGYFK-----DENFILKHDRAFLLSMANRGKHTN |
| XP_004277919 | HRVVKNFMIQGGDFSEGNKGKGGESYGGYFK-----DENFILKHDRAFLLSMANRGKHTN |
| XP_003894654 | HRVVKNFMIQGGDFSEGNKGKGGESYGGYFK-----DENFILKHDRAFLLSMANRGKHTN |
| XP_019802412 | HRVVKNFMIQGGDFSEGNKGKGGESYGGYFK-----DENFILKHDRAFLLSMANRGKHTN |
| XP_017811031 | HRVVKNFMIQGGDFSEGNKGKGGESYGGYFK-----DENFILKHDRAFLLSMANRGKHTN |
| XP_008982345 | HRVVKNFMIQGGDFSEGNKGKGGESYGGYFK-----DENFILKHDRAFLLSMANRGKHTN |
| XP_003477052 | HRVVKNFMIQGGDFSEGNKGKGGESYGGYFK-----DENFILKHDRAFLLSMANRGKHTN |
| XP_013015643 | HRVVKNFMIQGGDFSEGNKGKGGESYGGYFK-----DENFILKHDRAFLLSMANRGKHTN |
| XP_007499863 | HRVVKNFMIQGGDFSEGNKGKGGESYGGYFK-----DENFILKHDRAFLLSMANRGKHTN |
| XP_023581750 | HRVVKNFMIQGGDFSEGNKGKGGESYGGYFK-----DENFILKHDRAFLLSMANRGKHTN |
| XP_002813940 | HRVVKNFMIQGGDFSEGNKGKGGESYGGYFK-----DENFILKHDRAFLLSMANRGKHTN |
| XP_014390380 | HRVVKNFMIQGGDFSEGNKGKGGESYGGYFK-----DENFILKHDRAFLLSMANRGKHTN |
| XP_014323126 | HRVVKNFMIQGGDFSEGNKGKGGESYGGYFK-----DENFILKHDRAFLLSMANRGKHTN |
| XP_024100262 | HRVVKNFMIQGGDFSEGNKGKGGESYGGYFK-----DENFILKHDRAFLLSMANRGKHTN |
| XP_022409524 | HRVVKNFMIQGGDFSEGNKGKGGESYGGYFK-----DENFILKHDRAFLLSMANRGKHTN |
| XP_022409523 | HRVVKNFMIQGGDFSEGNKGKGGESYGGYFK-----DENFILKHDRAFLLSMANRGKHTN |
| XP_019802414 | HRVVKNFMIQGGDFSEGNKGKGGESYGGYFK-----DENFILKHDRAFLLSMANRGKHTN |
| XP_021062318 | HRVVKNFMIQGGDFSEGNKGKGGESYGGYFK-----DENFILKHDRAFLLSMANRGKHTN |
| XP_014390377 | HRVVKNFMIQGGDFSEGNKGKGGESYGGYFK-----DENFILKHDRAFLLSMANRGKHTN |
| XP_014323123 | HRVVKNFMIQGGDFSEGNKGKGGESYGGYFK-----DENFILKHDRAFLLSMANRGKHTN |
| XP_011889501 | HRVVKNFMIQGGDFSEGNKGKGGESYGGYFK-----DENFILKHDRAFLLSMANRGKHTN |

|              |                                                              |
|--------------|--------------------------------------------------------------|
| XP_015344917 | HRVVKNFMIQGGDFSEGNKGKGGESYGGYFK-----DENFILKHDRAFLLSMANRGKHTN |
| XP_011889500 | HRVVKNFMIQGGDFSEGNKGKGGESYGGYFK-----DENFILKHDRAFLLSMANRGKHTN |
| XP_016018800 | HRVVKNFMIQGGDFSEGNKGKGGESYGGYFK-----DENFVLKHDRAFLLSMANRGKHTN |
| XP_019802413 | HRVVKNFMIQGGDFSEGNKGKGGESYGGYFK-----DENFILKHDRAFLLSMANRGKHTN |
| XP_023581752 | HRVVKNFMIQGGDFSEGNKGKGGESYGGYFK-----DENFILKHDRAFLLSMANRGKHTN |
| XP_008847679 | HRVVKNFMIQGGDFSEGNKGKGGESYGGYFK-----DENFILKHDRAFLLSMANRGKHTN |
| XP_016018799 | HRVVKNFMIQGGDFSEGNKGKGGESYGGYFK-----DENFVLKHDRAFLLSMANRGKHTN |
| XP_016018798 | HRVVKNFMIQGGDFSEGNKGKGGESYGGYFK-----DENFVLKHDRAFLLSMANRGKHTN |
| XP_017497112 | HRVVKNFMIQGGDFSEGNKGKGGESYGGYFK-----DENFILKHDRAFLLSMANRGKHTN |
| XP_023371677 | HRVVKNFMIQGGDFSEGNKGKGGESYGGYFK-----DENFILKHDRAFLLSMANRGKHTN |
| XP_007947878 | HRVVKNFMIQGGDFSEGNKGKGGESYGGYFK-----DENFILKHDRAFLLSMANRGKHTN |
| XP_007445750 | HRVVKNFMIQGGDFSEGNKGKGGESYGGYFK-----DENFILKHDRAFLLSMANRGKHTN |
| XP_011889497 | HRVVKNFMIQGGDFSEGNKGKGGESYGGYFK-----DENFILKHDRAFLLSMANRGKHTN |
| XP_020854834 | HRVVKNFMIQGGDFSEGNKGKGGESYGGYFK-----DENFVLKHDRAFLLSMANRGKHTN |
| XP_012315531 | HRVVKNFMIQGGDFSEGNKGKGGESYGGYFK-----DENFILKHDRAFLLSMANRGKHTN |
| XP_020854833 | HRVVKNFMIQGGDFSEGNKGKGGESYGGYFK-----DENFVLKHDRAFLLSMANRGKHTN |
| XP_012315530 | HRVVKNFMIQGGDFSEGNKGKGGESYGGYFK-----DENFILKHDRAFLLSMANRGKHTN |
| XP_022409521 | HRVVKNFMIQGGDFSEGNKGKGGESYGGYFK-----DENFILKHDRAFLLSMANRGKHTN |
| XP_023384830 | HRVVKNFMIQGGDFSEGNKGKGGESYGGYFK-----DENFVLKHDRAFLLSMANRGKHTN |
| XP_020041827 | HRVVKNFMIQGGDFSEGNKGKGGESYGGYFK-----DENFILKHDRAFLLSMANRGKHTN |
| XP_015344916 | HRVVKNFMIQGGDFSEGNKGKGGESYGGYFK-----DENFILKHDRAFLLSMANRGKHTN |
| XP_008847678 | HRVVKNFMIQGGDFSEGNKGKGGESYGGYFK-----DENFILKHDRAFLLSMANRGKHTN |
| XP_015344914 | HRVVKNFMIQGGDFSEGNKGKGGESYGGYFK-----DENFILKHDRAFLLSMANRGKHTN |
| XP_008847677 | HRVVKNFMIQGGDFSEGNKGKGGESYGGYFK-----DENFILKHDRAFLLSMANRGKHTN |
| XP_005337989 | HRVVKNFMIQGGDFSEGNKGKGGESYGGYFK-----DENFILKHDRAFLLSMANRGKHTN |
| XP_021590709 | HRVVKNFMIQGGDFSEGNKGKGGESYGGYFK-----DENFILKHDRAFLLSMANRGKHTN |
| XP_022409522 | HRVVKNFMIQGGDFSEGNKGKGGESYGGYFK-----DENFILKHDRAFLLSMANRGKHTN |
| XP_021590708 | HRVVKNFMIQGGDFSEGNKGKGGESYGGYFK-----DENFILKHDRAFLLSMANRGKHTN |
| XP_021027182 | HRVVKNFMIQGGDFSEGNKGKGGESYGGYFK-----DENFILKHDRAFLLSMANRGKHTN |
| XP_006914886 | HRVVKNFMIQGGDFSEGNKGKGGESYGGYFK-----DENFVLKHDRAFLLSMANRGKHTN |
| XP_011355685 | HRVVKNFMIQGGDFSEGNKGKGGESYGGYFK-----DENFVLKHDRAFLLSMANRGKHTN |
| XP_023384828 | HRVVKNFMIQGGDFSEGNKGKGGESYGGYFK-----DENFVLKHDRAFLLSMANRGKHTN |
| XP_006914885 | HRVVKNFMIQGGDFSEGNKGKGGESYGGYFK-----DENFVLKHDRAFLLSMANRGKHTN |
| XP_012663507 | HRVVKNFMIQGGDFSEGNKGKGGESYGGYFK-----DENFILKHDRAFLLSMANRGKHTN |
| XP_012663506 | HRVVKNFMIQGGDFSEGNKGKGGESYGGYFK-----DENFILKHDRAFLLSMANRGKHTN |
| XP_017497113 | HRVVKNFMIQGGDFSEGNKGKGGESYGGYFK-----DENFILKHDRAFLLSMANRGKHTN |
| XP_016051563 | HRVVKNFMIQGGDFSEGNKGKGGESYGGYFK-----DENFILKHDRAFLLSMANRGKHTN |
| XP_017497111 | HRVVKNFMIQGGDFSEGNKGKGGESYGGYFK-----DENFILKHDRAFLLSMANRGKHTN |
| XP_017497110 | HRVVKNFMIQGGDFSEGNKGKGGESYGGYFK-----DENFILKHDRAFLLSMANRGKHTN |
| XP_012315529 | HRVVKNFMIQGGDFSEGNKGKGGESYGGYFK-----DENFILKHDRAFLLSMANRGKHTN |
| XP_020728074 | HRVVKNFMIQGGDFSEGNKGKGGESYGGYFK-----DENFILKHDRAFLLSMANRGKHTN |
| XP_012315528 | HRVVKNFMIQGGDFSEGNKGKGGESYGGYFK-----DENFILKHDRAFLLSMANRGKHTN |
| XP_020728073 | HRVVKNFMIQGGDFSEGNKGKGGESYGGYFK-----DENFILKHDRAFLLSMANRGKHTN |
| XP_021062319 | HRVVKNFMIQGGDFSEGNKGKGGESYGGYFK-----DENFILKHDRAFLLSMANRGKHTN |
| XP_021027181 | HRVVKNFMIQGGDFSEGNKGKGGESYGGYFK-----DENFILKHDRAFLLSMANRGKHTN |
| XP_021027180 | HRVVKNFMIQGGDFSEGNKGKGGESYGGYFK-----DENFILKHDRAFLLSMANRGKHTN |
| XP_004835151 | HRVVKNFMIQGGDFSEGNKGKGGESYGGYFK-----DENFILKHDRAFLLSMANRGKHTN |
| XP_012928271 | HRVVKNFMIQGGDFSEGNKGKGGESYGGYFK-----DENFILKHDRAFLLSMANRGKHTN |
| XP_021590705 | HRVVKNFMIQGGDFSEGNKGKGGESYGGYFK-----DENFILKHDRAFLLSMANRGKHTN |
| XP_011241241 | HRVVKNFMIQGGDFSEGNKGKGGESYGGYFK-----DENFILKHDRAFLLSMANRGKHTN |
| NP_035048    | HRVVKNFMIQGGDFSEGNKGKGGESYGGYFK-----DENFILKHDRAFLLSMANRGKHTN |
| XP_017168694 | HRVVKNFMIQGGDFSEGNKGKGGESYGGYFK-----DENFILKHDRAFLLSMANRGKHTN |
| XP_005348185 | HRVVKNFMIQGGDFSEGNKGKGGESYGGYFK-----DENFILKHDRAFLLSMANRGKHTN |
| XP_005082370 | HRVVKNFMIQGGDFSEGNKGKGGESYGGYFK-----DENFILKHDRAFLLSMANRGKHTN |
| XP_021503066 | HRVVKNFMIQGGDFSEGNKGKGGESYGGYFK-----DENFILKHDRAFLLSMANRGKHTN |
| XP_021503065 | HRVVKNFMIQGGDFSEGNKGKGGESYGGYFK-----DENFILKHDRAFLLSMANRGKHTN |
| XP_021503062 | HRVVKNFMIQGGDFSEGNKGKGGESYGGYFK-----DENFILKHDRAFLLSMANRGKHTN |
| XP_021503063 | HRVVKNFMIQGGDFSEGNKGKGGESYGGYFK-----DENFILKHDRAFLLSMANRGKHTN |

|              |                                                              |
|--------------|--------------------------------------------------------------|
| XP_008568057 | HRVVKNFMIQGGDFSEGNKGKGGESYGGYFK-----DENFILKHDRAFLLSMANRGKHTN |
| XP_008568056 | HRVVKNFMIQGGDFSEGNKGKGGESYGGYFK-----DENFILKHDRAFLLSMANRGKHTN |
| XP_006120664 | HRVVKNFMIQGGDFSEGNKGKGGESYGGYFK-----DENFVLKHDRAFLLSMANRGKHTN |
| XP_007055629 | HRVVKNFMIQGGDFSEGNKGKGGESYGGYFK-----DENFVLKHDRAFLLSMANRGKHTN |
| XP_006120661 | HRVVKNFMIQGGDFSEGNKGKGGESYGGYFK-----DENFVLKHDRAFLLSMANRGKHTN |
| XP_006120659 | HRVVKNFMIQGGDFSEGNKGKGGESYGGYFK-----DENFVLKHDRAFLLSMANRGKHTN |
| XP_007106819 | HRVVKNFMIQGGDFSEGNKGKGGESYGGYFKEACSDENFILKHDRAFLLSMANRGKHTN  |
| XP_015708506 | HRVVKNFMIQGGDFSEGNKGKGGESYGGYFK-----DENFILKHDRAFLLSMANRGKHTN |
| XP_009682494 | HRVVKNFMIQGGDFSEGNKGKGGESYGGYFK-----DENFILKHDRAFLLSMANRGKHTN |
| XP_009682493 | HRVVKNFMIQGGDFSEGNKGKGGESYGGYFK-----DENFILKHDRAFLLSMANRGKHTN |
| XP_009682492 | HRVVKNFMIQGGDFSEGNKGKGGESYGGYFK-----DENFILKHDRAFLLSMANRGKHTN |
| XP_009682491 | HRVVKNFMIQGGDFSEGNKGKGGESYGGYFK-----DENFILKHDRAFLLSMANRGKHTN |
| XP_019471734 | HRVVKNFMIQGGDFSEGNKGKGGESYGGYFK-----DENFILKHDRAFLLSMANRGKHTN |
| XP_010710549 | HRVVKNFMIQGGDFSEGNKGKGGESYGGYFK-----DENFILKHDRAFLLSMANRGKHTN |
| XP_010710548 | HRVVKNFMIQGGDFSEGNKGKGGESYGGYFK-----DENFILKHDRAFLLSMANRGKHTN |
| XP_015136632 | HRVVKNFMIQGGDFSEGNKGKGGESYGGYFK-----DENFILKHDRAFLLSMANRGKHTN |
| XP_004939132 | HRVVKNFMIQGGDFSEGNKGKGGESYGGYFK-----DENFILKHDRAFLLSMANRGKHTN |
| XP_004939131 | HRVVKNFMIQGGDFSEGNKGKGGESYGGYFK-----DENFILKHDRAFLLSMANRGKHTN |
| XP_013795593 | HRVVKNFMIQGGDFSEGNKGKGGESYGGYFK-----DENFILKHDRAFLLSMANRGKHTN |
| XP_019363610 | HRVVKNFMIQGGDFSEGNKGKGGESYGGYFK-----DENFILKHDRAFLLSMANRGKHTN |
| XP_014376468 | HRVVKNFMIQGGDFSEGNKGKGGESYGGYFK-----DENFILKHDRAFLLSMANRGKHTN |
| XP_007659513 | HRVVKNFMIQGGDFSEGNKGKGGESYGGYFK-----DENFVLKHDRAFLLSMANRGKHTN |
| XP_021241246 | HRVVKNFMIQGGDFSEGNKGKGGESYGGYFK-----DENFILKHDRAFLLSMANRGKHTN |
| XP_021241236 | HRVVKNFMIQGGDFSEGNKGKGGESYGGYFK-----DENFILKHDRAFLLSMANRGKHTN |
| XP_021241235 | HRVVKNFMIQGGDFSEGNKGKGGESYGGYFK-----DENFILKHDRAFLLSMANRGKHTN |
| XP_017731869 | HRVVKNFMIQGGDFSEGNKGKGGESYGGYFK-----DENFILKHDRAFLLSMANRGKHTN |
| XP_012426793 | HRVVKNFMIQGGDFSEGNKGKGGESYGGYFK-----DENFILKHDRAFLLSMANRGKHTN |
| XP_017944741 | HRVVKNFMIQGGDFSEGNKGKGGESYGGYFK-----DENFILKHDRAFLLSMANRGKHTN |
| XP_017944740 | HRVVKNFMIQGGDFSEGNKGKGGESYGGYFK-----DENFILKHDRAFLLSMANRGKHTN |
| XP_010393085 | HRVVKNFMIQGGDFSEGNKGKGGESYGGYFK-----DENFILKHDRAFLLSMANRGKHTN |
| XP_017685518 | HRVVKNFMIQGGDFSEGNKGKGGESYGGYFK-----DENFILKHDRAFLLSMANRGKHTN |
| XP_017602246 | HRVVKNFMIQGGDFSEGNKGKGGESYGGYFK-----DENFILKHDRAFLLSMANRGKHTN |
| XP_016151723 | HRVVKNFMIQGGDFSEGNKGKGGESYGGYFK-----DENFILKHDRAFLLSMANRGKHTN |
| XP_019138709 | HRVVKNFMIQGGDFSEGNKGKGGESYGGYFK-----DENFILKHDRAFLLSMANRGKHTN |
| XP_017685517 | HRVVKNFMIQGGDFSEGNKGKGGESYGGYFK-----DENFILKHDRAFLLSMANRGKHTN |
| XP_017602245 | HRVVKNFMIQGGDFSEGNKGKGGESYGGYFK-----DENFILKHDRAFLLSMANRGKHTN |
| XP_005040539 | HRVVKNFMIQGGDFSEGNKGKGGESYGGYFK-----DENFILKHDRAFLLSMANRGKHTN |
| XP_005040538 | HRVVKNFMIQGGDFSEGNKGKGGESYGGYFK-----DENFILKHDRAFLLSMANRGKHTN |
| XP_005040537 | HRVVKNFMIQGGDFSEGNKGKGGESYGGYFK-----DENFILKHDRAFLLSMANRGKHTN |
| XP_014800495 | HRVVKNFMIQGGDFSEGNKGKGGESYGGYFK-----DENFILKHDRAFLLSMANRGKHTN |
| XP_008168983 | HRVVKNFMIQGGDFSEGNKGKGGESYGGYFK-----DENFVLKHDRAFLLSMANRGKHTN |
| XP_017944739 | HRVVKNFMIQGGDFSEGNKGKGGESYGGYFK-----DENFILKHDRAFLLSMANRGKHTN |
| XP_014729203 | HRVVKNFMIQGGDFSEGNKGKGGESYGGYFK-----DENFILKHDRAFLLSMANRGKHTN |
| XP_017944736 | HRVVKNFMIQGGDFSEGNKGKGGESYGGYFK-----DENFILKHDRAFLLSMANRGKHTN |
| XP_014729201 | HRVVKNFMIQGGDFSEGNKGKGGESYGGYFK-----DENFILKHDRAFLLSMANRGKHTN |
| XP_010393084 | HRVVKNFMIQGGDFSEGNKGKGGESYGGYFK-----DENFILKHDRAFLLSMANRGKHTN |
| XP_017944735 | HRVVKNFMIQGGDFSEGNKGKGGESYGGYFK-----DENFILKHDRAFLLSMANRGKHTN |
| XP_017685520 | HRVVKNFMIQGGDFSEGNKGKGGESYGGYFK-----DENFILKHDRAFLLSMANRGKHTN |
| XP_017602244 | HRVVKNFMIQGGDFSEGNKGKGGESYGGYFK-----DENFILKHDRAFLLSMANRGKHTN |
| XP_014729200 | HRVVKNFMIQGGDFSEGNKGKGGESYGGYFK-----DENFILKHDRAFLLSMANRGKHTN |
| XP_010393082 | HRVVKNFMIQGGDFSEGNKGKGGESYGGYFK-----DENFILKHDRAFLLSMANRGKHTN |
| XP_017685515 | HRVVKNFMIQGGDFSEGNKGKGGESYGGYFK-----DENFILKHDRAFLLSMANRGKHTN |
| XP_017602242 | HRVVKNFMIQGGDFSEGNKGKGGESYGGYFK-----DENFILKHDRAFLLSMANRGKHTN |
| XP_017602241 | HRVVKNFMIQGGDFSEGNKGKGGESYGGYFK-----DENFILKHDRAFLLSMANRGKHTN |
| KFP58102     | HRVVKNFMIQGGDFSEGNKGKGGESYGGYFK-----DENFILKHDRAFLLSMANRGKHTN |
| XP_010393081 | HRVVKNFMIQGGDFSEGNKGKGGESYGGYFK-----DENFILKHDRAFLLSMANRGKHTN |
| XP_017685514 | HRVVKNFMIQGGDFSEGNKGKGGESYGGYFK-----DENFILKHDRAFLLSMANRGKHTN |
| XP_017602240 | HRVVKNFMIQGGDFSEGNKGKGGESYGGYFK-----DENFILKHDRAFLLSMANRGKHTN |

XP\_010559721 HRVVKNFMIQGGDFSEGNKGKGGESYGGYFK-----DENFILKHDRAFLLSMANRGKHTN  
XP\_014800494 HRVVKNFMIQGGDFSEGNKGKGGESYGGYFK-----DENFILKHDRAFLLSMANRGKHTN  
XP\_011571332 HRVVKNFMIQGGDFSEGNKGKGGESYGGYFK-----DENFILKHDRAFLLSMANRGKHTN  
XP\_010559712 HRVVKNFMIQGGDFSEGNKGKGGESYGGYFK-----DENFILKHDRAFLLSMANRGKHTN  
XP\_009331567 HRVVKNFMIQGGDFSEGNKGKGGESYGGYFK-----DENFILKHDRAFLLSMANRGKHTN  
XP\_008492672 HRVVKNFMIQGGDFSEGNKGKGGESYGGYFK-----DENFILKHDRAFLLSMANRGKHTN  
XP\_014800492 HRVVKNFMIQGGDFSEGNKGKGGESYGGYFK-----DENFILKHDRAFLLSMANRGKHTN  
XP\_011571324 HRVVKNFMIQGGDFSEGNKGKGGESYGGYFK-----DENFILKHDRAFLLSMANRGKHTN  
XP\_009697766 HRVVKNFMIQGGDFSEGNKGKGGESYGGYFK-----DENFILKHDRAFLLSMANRGKHTN  
XP\_009331566 HRVVKNFMIQGGDFSEGNKGKGGESYGGYFK-----DENFILKHDRAFLLSMANRGKHTN  
XP\_009274213 HRVVKNFMIQGGDFSEGNKGKGGESYGGYFK-----DENFILKHDRAFLLSMANRGKHTN  
XP\_014800491 HRVVKNFMIQGGDFSEGNKGKGGESYGGYFK-----DENFILKHDRAFLLSMANRGKHTN  
XP\_010301634 HRVVKNFMIQGGDFSEGNKGKGGESYGGYFK-----DENFILKHDRAFLLSMANRGKHTN  
XP\_008168980 HRVVKNFMIQGGDFSEGNKGKGGESYGGYFK-----DENFILKHDRAFLLSMANRGKHTN  
XP\_023963187 HRVVKNFMIQGGDFSEGNKGKGGESYGGYFK-----DENFILKHDRAFLLSMANRGKHTN  
XP\_005150066 HRVVKNFMIQGGDFSEGNKGKGGESYGGYFK-----DENFILKHDRAFLLSMANRGKHTN  
XP\_009473612 HRVVKNFMIQGGDFSEGNKGKGGESYGGYFK-----DENFILKHDRAFLLSMANRGKHTN  
XP\_021393646 HRVVKNFMIQGGDFSEGNKGKGGESYGGYFK-----DENFILKHDRAFLLSMANRGKHTN  
XP\_021393642 HRVVKNFMIQGGDFSEGNKGKGGESYGGYFK-----DENFILKHDRAFLLSMANRGKHTN  
XP\_021393643 HRVVKNFMIQGGDFSEGNKGKGGESYGGYFK-----DENFILKHDRAFLLSMANRGKHTN  
XP\_009878793 HRVVKNFMIQGGDFSEGNKGKGGESYGGYFK-----DENFILKHDRAFLLSMANRGKHTN  
XP\_021393641 HRVVKNFMIQGGDFSEGNKGKGGESYGGYFK-----DENFILKHDRAFLLSMANRGKHTN  
XP\_018764676 HRVVKNFMIQGGDFSEGNKGKGGESYGGYFK-----DENFILKHDRAFLLSMANRGKHTN  
XP\_018764674 HRVVKNFMIQGGDFSEGNKGKGGESYGGYFK-----DENFILKHDRAFLLSMANRGKHTN  
XP\_018764673 HRVVKNFMIQGGDFSEGNKGKGGESYGGYFK-----DENFILKHDRAFLLSMANRGKHTN  
KfV02250 HRVVKNFMIQGGDFSEGNKGKGGESYGGYFK-----DENFILKHDRAFLLSMANRGKHTN  
XP\_014125627 HRVVKNFMIQGGDFSEGNKGKGGESYGGYFK-----DENFILKHDRAFLLSMANRGKHTN  
XP\_010083448 HRVVKNFMIQGGDFSEGNKGKGGESYGGYFK-----DENFILKHDRAFLLSMANRGKHTN  
XP\_014125626 HRVVKNFMIQGGDFSEGNKGKGGESYGGYFK-----DENFILKHDRAFLLSMANRGKHTN  
XP\_014112250 HRVVKNFMIQGGDFSEGNKGKGGESYGGYFK-----DENFILKHDRAFLLSMANRGKHTN  
XP\_014112249 HRVVKNFMIQGGDFSEGNKGKGGESYGGYFK-----DENFILKHDRAFLLSMANRGKHTN  
XP\_014125625 HRVVKNFMIQGGDFSEGNKGKGGESYGGYFK-----DENFILKHDRAFLLSMANRGKHTN  
XP\_014112248 HRVVKNFMIQGGDFSEGNKGKGGESYGGYFK-----DENFILKHDRAFLLSMANRGKHTN  
XP\_005428264 HRVVKNFMIQGGDFSEGNKGKGGESYGGYFK-----DENFILKHDRAFLLSMANRGKHTN  
XP\_015474510 HRVVKNFMIQGGDFSEGNKGKGGESYGGYFK-----DENFILKHDRAFLLSMANRGKHTN  
XP\_023777798 HRVVKNFMIQGGDFSEGNKGKGGESYGGYFK-----DENFILKHDRAFLLSMANRGKHTN  
XP\_015474508 HRVVKNFMIQGGDFSEGNKGKGGESYGGYFK-----DENFILKHDRAFLLSMANRGKHTN  
XP\_023777797 HRVVKNFMIQGGDFSEGNKGKGGESYGGYFK-----DENFILKHDRAFLLSMANRGKHTN  
XP\_023777796 HRVVKNFMIQGGDFSEGNKGKGGESYGGYFK-----DENFILKHDRAFLLSMANRGKHTN  
XP\_015474507 HRVVKNFMIQGGDFSEGNKGKGGESYGGYFK-----DENFILKHDRAFLLSMANRGKHTN  
XP\_023777795 HRVVKNFMIQGGDFSEGNKGKGGESYGGYFK-----DENFILKHDRAFLLSMANRGKHTN  
KfQ42818 HRVVKNFMIQGGDFSEGNKGKGGESYGGYFK-----DENFILKHDRAFLLSMANRGKHTN  
XP\_019355067 HRVVKNFMIQGGDFSEGNKGKGGESYGGYFK-----DENFILKHDRAFLLSMANRGKHTN  
XP\_010014722 HRVVKNFMIQGGDFSEGNKGKGGESYGGYFK-----DENFILKHDRAFLLSMANRGKHTN  
XP\_009556564 HRVVKNFMIQGGDFSEGNKGKGGESYGGYFK-----DENFILKHDRAFLLSMANRGKHTN  
XP\_009993002 HRVVKNFMIQGGDFSEGNKGKGGESYGGYFK-----DENFILKHDRAFLLSMANRGKHTN  
XP\_009896433 HRVVKNFMIQGGDFSEGNKGKGGESYGGYFN-----DENFILKHDRAFLLSMANRGKHTN  
XP\_010213065 HRVVKNFMIQGGDFSEGNKGKGGESYGGYFK-----DENFILKHDRAFLLSMANRGKHTN  
XP\_019384731 HRVVKNFMIQGGDFSEGNKGKGGESYGGYFK-----DENFILKHDRAFLLSMANRGKHTN  
XP\_008110438 HRVVKNFMIQGGDFSEGNKGKGGESYGGYFK-----DENFILKHDRAFLLSMANRGKHTN  
XP\_008110436 HRVVKNFMIQGGDFSEGNKGKGGESYGGYFK-----DENFILKHDRAFLLSMANRGKHTN  
XP\_015264278 HRVVKNFMIQGGDFSEGNKGKGGESYGGYFK-----DENFILKHDRAFLLSMANRGKHTN  
XP\_013917336 HRVVKSFI IQGGDFSEGNKGKGGESYGGYFK-----DENFILKHDRAFLLSMANRGKHTN  
XP\_020670421 HRVVKNFMIQGGDFSEGNKGKGGESYGGYFK-----DENFILKHDRAFLLSMANRGKHTN  
XP\_020670420 HRVVKNFMIQGGDFSEGNKGKGGESYGGYFK-----DENFILKHDRAFLLSMANRGKHTN  
XP\_015667896 HRVVKSFI IQGGDFSEGNKGKGGESYGGYFK-----DENFILKHDRAFLLSMANRGKHTN  
XP\_007443413 HRVVKSFI IQGGDFSEGNKGKGGESYGGYFK-----DENFILKHDRAFLLSMANRGKHTN  
XP\_007443411 HRVVKSFI IQGGDFSEGNKGKGGESYGGYFK-----DENFILKHDRAFLLSMANRGKHTN

|              |                                                               |
|--------------|---------------------------------------------------------------|
| XP_017451684 | HRVVKNFMIQGGDFSEGNGKGGESIYGGYFK-----DENFILKHDRAFLLSMANRGKHTN  |
| XP_014918330 | HRVVKNFMIQGGDFSEGNGKGGESIYGGYFK-----DENFILKHDRAFLLSMANRGKHTN  |
| XP_002939352 | HRVVKNFMIQGGDFSEGNGKGGESIYGGYFK-----DENFILKHDRAFLLSMANRGKNTN  |
| XP_018124467 | HRVVKNFMIQGGDFSEGNGKGGESIYGSYFR-----DENFILKHDRAFLLSMANRGENTN  |
| XP_017572959 | HRVVKNFMIQGGDFTEGNGRGGESIYGGYFE-----DENFILKHDRAFLLSMANRGKDTN  |
| XP_018607018 | HRVVKNFMIQGGDFTEGNGKGGESIYGGYFE-----DENFTLKHDRAFLLSMANRGKDTN  |
| XP_018607016 | HRVVKNFMIQGGDFTEGNGKGGESIYGGYFE-----DENFTLKHDRAFLLSMANRGKDTN  |
| XP_007544596 | HRVVKNFMIQGGDFTEGTGRGGESIYGGYFE-----DENFILKHDKAFLLSMANRGKNTN  |
| XP_018607022 | HRVVKNFMIQGGDFTEGNGKGGESIYGGYFE-----DENFTLKHDRAFLLSMANRGKDTN  |
| XP_009443552 | HRVVKNFMIQGGDFSEGNGKGGESIYGGYFK-----DENFILKHDRAFLLSMANRGKHTN  |
| PNJ74568     | HRVVKNFMIQGGDFSEGNGKGGESIYGGYFK-----DENFILKHDRAFLLSMANRGKHTN  |
| PNJ74566     | HRVVKNFMIQGGDFSEGNGKGGESIYGGYFK-----DENFILKHDRAFLLSMANRGKHTN  |
| XP_018122561 | HRVVKNFMIQGGDFSEGNGKGGESIYGGYFK-----DENFILKHDRAFLLSMANRGKNTN  |
| XP_012735608 | HRVVKKFMIQGGDFTEGNGRGGESIYGGYFE-----DENFILKHDRAFLLSMANRGKNTN  |
| XP_022065410 | HRVVKNFMIQGGDFTEGNGRGGESIYGGYFE-----DENFTLKHDRAFLLSMANRGKDTN  |
| XP_023122049 | HRVVKNFMIQGGDFTEGNGRGGESIYGGYFE-----DENFTLKHDRAFLLSMANRGKDTN  |
| XP_022065408 | HRVVKNFMIQGGDFTEGNGRGGESIYGGYFE-----DENFTLKHDRAFLLSMANRGKDTN  |
| XP_023122045 | HRVVKNFMIQGGDFTEGNGRGGESIYGGYFE-----DENFTLKHDRAFLLSMANRGKDTN  |
| XP_022065407 | HRVVKNFMIQGGDFTEGNGRGGESIYGGYFE-----DENFTLKHDRAFLLSMANRGKDTN  |
| XP_022065406 | HRVVKNFMIQGGDFTEGNGRGGESIYGGYFE-----DENFTLKHDRAFLLSMANRGKDTN  |
| XP_023122044 | HRVVKNFMIQGGDFTEGNGRGGESIYGGYFE-----DENFTLKHDRAFLLSMANRGKDTN  |
| XP_022065405 | HRVVKNFMIQGGDFTEGNGRGGESIYGGYFE-----DENFTLKHDRAFLLSMANRGKDTN  |
| XP_023122043 | HRVVKNFMIQGGDFTEGNGRGGESIYGGYFE-----DENFTLKHDRAFLLSMANRGKDTN  |
| XP_018414151 | HRVVKHFMFIQGGDFSEGNGKGGESIYGGFFK-----DENFILKHDRAFLLSMANRGKHTN |
| XP_023490562 | HRVVKNFMIQGGDFSEGNGKGGESIYGGYFK-----DENFILKHDRAFLLSMANRGKHTN  |
| XP_008304546 | HRVVKNFMIQGGDFTEGNGRGGESIYGGYFE-----DENFTLKHDRAFLLSMANRGKDTN  |
| KKF16876     | HRVVKNFMVQGGDFTEGNGRGGESIYGGYFE-----DENFTLKHDRAFLLSMANRGKDTN  |
| XP_008304545 | HRVVKNFMIQGGDFTEGNGRGGESIYGGYFE-----DENFTLKHDRAFLLSMANRGKDTN  |
| XP_015249666 | HRVVKNFMVQGGDFTEGNGRGGESIYGGYFE-----DENFILKHDRAFLLSMANRGKDTN  |
| XP_018529332 | HRVVKNFMIQGGDFTEGNGRGGESIYGGYFE-----DENFTLKHDRAFLLSMANRGKDTN  |
| XP_018529331 | HRVVKNFMIQGGDFTEGNGRGGESIYGGYFE-----DENFTLKHDRAFLLSMANRGKDTN  |
| XP_010751380 | HRVVKNFMVQGGDFTEGNGRGGESIYGGYFE-----DENFTLKHDRAFLLSMANRGKDTN  |
| XP_010751371 | HRVVKNFMVQGGDFTEGNGRGGESIYGGYFE-----DENFTLKHDRAFLLSMANRGKDTN  |
| XP_019745550 | HRVVKNFMIQGGDFTEGNGRGGESIYGGYFE-----DENFTLKHDRAFLLSMANRGKDTN  |
| XP_010751365 | HRVVKNFMVQGGDFTEGNGRGGESIYGGYFE-----DENFTLKHDRAFLLSMANRGKDTN  |
| XP_019745545 | HRVVKNFMIQGGDFTEGNGRGGESIYGGYFE-----DENFTLKHDRAFLLSMANRGKDTN  |
| XP_023263705 | HRVVKNFMVQGGDFTEGNGRGGESIYGGYFE-----DENFTLKHDRAFLLSMANRGKDTN  |
| XP_023263706 | HRVVKNFMVQGGDFTEGNGRGGESIYGGYFE-----DENFTLKHDRAFLLSMANRGKDTN  |
| XP_001338072 | HRVVKNFMIQGGDFTEGNGRGGESIFGGFFE-----DENFTLKHDRAFLLSMANRGKDTN  |
| XP_022599954 | HRVVKNFMVQGGDFTEGNGRGGESIYGGYFE-----DENFTLKHDRAFLLSMANRGKDTN  |
| XP_019897364 | HRVVKNFMIQGGDFTEGNGRGGESIFGGYFE-----DENFILKHDRAFLLSMANRGKHTN  |
| XP_010900666 | HRVVKNFMIQGGDFTEGNGRGGESIFGGYFE-----DENFILKHDRAFLLSMANRGKHTN  |
| XP_010900665 | HRVVKNFMIQGGDFTEGNGRGGESIFGGYFE-----DENFILKHDRAFLLSMANRGKHTN  |
| XP_010900664 | HRVVKNFMIQGGDFTEGNGRGGESIFGGYFE-----DENFILKHDRAFLLSMANRGKHTN  |
| XP_019897363 | HRVVKNFMIQGGDFTEGNGRGGESIFGGYFE-----DENFILKHDRAFLLSMANRGKHTN  |
| XP_010167755 | HRVVKNFMIQGGDFSEGNGKGGESIYGGYFK-----DENFILKHDRAFLLSMANRGKHTN  |
| XP_010900668 | HRVVKNFMIQGGDFTEGNGRGGESIFGGYFE-----DENFILKHDRAFLLSMANRGKHTN  |
| XP_016427080 | HRVVKNFMIQGGDFTEGNGRGGESIYGGFFE-----DENFTLKHDRAFLLSMANRGKDTN  |
| XP_016318510 | HRVVKNFMIQGGDFTEGNGRGGESIYGGFFE-----DENFTLKHDRAFLLSMANRGKDTN  |
| XP_015209664 | HRVVKSFMFIQGGDFTEGNGRGGESIFGGYFE-----DENFTLKHDRAFLLSMANRGKDTN |
| XP_015209662 | HRVVKSFMFIQGGDFTEGNGRGGESIFGGYFE-----DENFTLKHDRAFLLSMANRGKDTN |
| XP_015209665 | HRVVKSFMFIQGGDFTEGNGRGGESIFGGYFE-----DENFTLKHDRAFLLSMANRGKDTN |
| XP_005912346 | HRVVKNFMIQGGDFTEGNGRGGESIYGGYFE-----DENFTLKHDRAFLLSMANRGKDTN  |
| XP_005722738 | HRVVKNFMIQGGDFTEGNGRGGESIYGGYFE-----DENFTLKHDRAFLLSMANRGKDTN  |
| XP_020457914 | HRVVKNFMIQGGDFTEGNGRGGESIYGGYFE-----DENFILKHDRAFLLSMANRGKNTN  |
| XP_013132609 | HRVVKNFMIQGGDFTEGNGRGGESIYGGYFE-----DENFTLKHDRAFLLSMANRGKDTN  |
| XP_004546791 | HRVVKNFMIQGGDFTEGNGRGGESIYGGYFE-----DENFTLKHDRAFLLSMANRGKDTN  |
| XP_006795195 | HRVVKNFMIQGGDFTEGNGRGGESIYGGYFE-----DENFTLKHDRAFLLSMANRGKDTN  |

|              |                                                               |
|--------------|---------------------------------------------------------------|
| XP_005912345 | HRVVKNFMIQGGDFTEGNGRGGESIYGGYFE-----DENFTLKHDRAFLLSMANRGKDTN  |
| XP_005722737 | HRVVKNFMIQGGDFTEGNGRGGESIYGGYFE-----DENFTLKHDRAFLLSMANRGKDTN  |
| XP_021475699 | HRVVKNFMIQGGDFTEGNGRGGESIYGGYFE-----DENFTLKHDRAFLLSMANRGKHTN  |
| XP_004546790 | HRVVKNFMIQGGDFTEGNGRGGESIYGGYFE-----DENFTLKHDRAFLLSMANRGKDTN  |
| XP_003439241 | HRVVKNFMIQGGDFTEGNGRGGESIYGGYFE-----DENFTLKHDRAFLLSMANRGKDTN  |
| XP_006795194 | HRVVKNFMIQGGDFTEGNGRGGESIYGGYFE-----DENFTLKHDRAFLLSMANRGKDTN  |
| XP_023490560 | HRVVKNFMIQGGDFSEGNGKGGESIYGGYFK-----DENFTLKHDRAFLLSMANRGKHTN  |
| XP_015209666 | HRVVKSFMFIQGGDFTEGNGRGGESIFGGYFE-----DENFTLKHDRAFLLSMANRGKDTN |
| XP_005797888 | HRVVKNFMIQGGDFTEGTGRGGESIYGGYFE-----DENFTLKHDRAFLLSMANRGKNTN  |
| CBN81984     | HRVVKNFMIQGGDFTEGNGRGGESIYGGYFE-----DENFTLKHDRPFLLSMANRGKDTN  |
| XP_010559731 | HRVVKNFMIQGGDFSEGNGKGGESIYGGYFK-----DENFTLKHDRAFLLSMANRGKHTN  |
| XP_007544415 | HRVVKNFMIQGGDFTEGTGRGGESIYGGYFE-----DENFTLKHDRAFLLSMANRGKNTN  |
| XP_014870682 | HRVVKNFMIQGGDFTEGTGRGGESIYGGYFE-----DENFTLKHDRAFLLSMANRGKNTN  |
| XP_011606242 | HRVVKNFMIQGGDFTEGNGRGGESIYGGFFE-----DENFTLKHDRAFLLSMANRGKDTN  |
| CAG04245     | HRVVKNFMIQGGDFTEGNGRGGESIYGGYFE-----DENFTLKHDRAFLLSMANRGKDTN  |
| XP_016887118 | HRVVKNFMIQGGDFTEGNGRGGESIYGGYFE-----DENFTLKHDRAFLLSMANRGKDTN  |
| XP_008306161 | HRVVKNFMIQGGDFTEGNGRGGESIYGGYFE-----DENFTLKHDRAFLLSMANRGKDTN  |
| XP_008394441 | HRVVKNFMIQGGDFTEGTGRGGESIYGGYFE-----DENFTLKHDRAFLLSMANRGKNTN  |
| XP_014825423 | HRVVKNFMIQGGDFTEGTGRGGESIYGGYFE-----DENFTLKHDRAFLLSMANRGKNTN  |
| XP_012398954 | HRVVKNFMIQGGDFSEGNGKGGESIYGGYFK-----DENFTLKHDRAFLLSMANRGKHTN  |
| XP_019063096 | HRVVKNFMIQGGDFSEGNGKGGESIYGGYFK-----DENFTLKHDRAFLLSMANRGKHTN  |
| XP_009073803 | HRVVKNFMIQGGDFSEGNGKGGESIYGGYFK-----DENFTLKHDRAFLLSMANRGKHTN  |
| XP_016400109 | HRVVKNFMIQGGDFTEGNGRGGESIYGGFFE-----DENFTLKHDRAFLLSMANRGKDTN  |
| XP_016359192 | HRVVKNFMIQGGDFTEGNGRGGESIYGGFFE-----DENFTLKHDRAFLLSMANRGKDTN  |
| XP_004081327 | HRVVKNFMIQGGDFTEGTGRGGESIYGGYFK-----DENFTLKHDRAFLLSMANRGKDTN  |
| XP_020568300 | HRVVKNFMIQGGDFTEGTGRGGESIYGGYFK-----DENFTLKHDRAFLLSMANRGKDTN  |
| XP_016041020 | HRVVKNFMIQGGDFSEGNGKGGESIYGGYFK-----DENFTLKHDRAFLLSMANRGKHTN  |
| XP_017942181 | HRVVKNFMIQGGDFSEGNGKGGESIYGGYFK-----DENFTLKHDRAFLLSMANRGKHTN  |
| XP_017942183 | HRVVKNFMIQGGDFSEGNGKGGESIYGGYFK-----DENFTLKHDRAFLLSMANRGKHTN  |
| XP_017942182 | HRVVKNFMIQGGDFSEGNGKGGESIYGGYFK-----DENFTLKHDRAFLLSMANRGKHTN  |
| XP_020501265 | HRVVKNFMVQGGDFTEGNGRGGESIYGGYFE-----DENFTLKHDRPFLLSMANRGKDTN  |
| KFP01329     | HRVVKNFMIQGGDFTEGNGRGGESIYGGYFK-----DENFTLKHDRAFLLSMANRGKHTN  |
| XP_015856948 | HRVVKNFMIQGGDFSEGNGKGGESIYGGYFK-----DENFTLKHDRAFLLSMANRGKHTN  |
| XP_020139631 | HRVVKNFMIQGGDFSEGNGKGGESIYGGYFK-----DENFTLKHDRAFLLSMANRGKHTN  |
| XP_020139628 | HRVVKNFMIQGGDFSEGNGKGGESIYGGYFK-----DENFTLKHDRAFLLSMANRGKHTN  |
| XP_006982975 | HRVVKNFMIQGGDFSEGNGKGGESIYGGYFK-----DENFTLKHDRAFLLSMANRGKHTN  |
| XP_015856947 | HRVVKNFMIQGGDFSEGNGKGGESIYGGYFK-----DENFTLKHDRAFLLSMANRGKHTN  |
| XP_014427753 | HRVVKNFMIQGGDFSEGNGKGGESIYGGYFK-----DENFTLKHDRAFLLSMANRGKHTN  |
| XP_013857648 | HRVVKNFMIQGGDFTEGNGRGGESIYGGYFE-----DENFTLKHNRPFLLSMANRGKNTN  |
| XP_023656013 | HRVVKNFMIQGGDFTEGNGRGGESIYGGYFE-----DENFTLKHDRAFLLSMANRGKDTN  |
| XP_023656011 | HRVVKNFMIQGGDFTEGNGRGGESIYGGYFE-----DENFTLKHDRAFLLSMANRGKDTN  |
| XP_023656014 | HRVVKNFMIQGGDFTEGNGRGGESIYGGYFE-----DENFTLKHDRAFLLSMANRGKDTN  |
| XP_004448689 | HRVVKNFMIQGGDFSEGNGKGGESIYGGYFK-----DENFTLKHDRAFLLSMANRGKHTN  |
| XP_004448688 | HRVVKNFMIQGGDFSEGNGKGGESIYGGYFK-----DENFTLKHDRAFLLSMANRGKHTN  |
| XP_023476440 | HRVVKNFMIQGGDFSEGNGKGGESIYGGYFK-----DENFTLKHDRAFLLSMANRGKHTN  |

\*\*\*\*\* \*: :\*\*\*\*\*:\*. \*:\*\*\*\*\*:\*. :\*. :\*. :\*. :\*. :\*\*\*\*\*:\*. :\*

|              |                                                             |
|--------------|-------------------------------------------------------------|
| NP_005376    | GSQFFITTKPAPHLDGVHVVFGLVISGFEVIEQIENLKTDAA SRPYADVRVIDCGVLA |
| XP_014646452 | GSQFFITTKPAPHLDGVHVVFGLVISGFEVIEQIENLKTDAA SRPYADVRVIDCGVLA |
| XP_017657797 | GSQFFITTKPAPHLDGVHVVFGLVISGFEVIEQIENLKTDAA SRPYADVRVIDCGVLA |
| XP_012885690 | GSQFFITTKPAPHLDGVHVVFGLVISGFEVIEQIENLKTDAA SRPYADVRVIDCGVLA |
| XP_008530969 | GSQFFITTKPAPHLDGVHVVFGLVISGFEVIEQIENLKTDAA SRPYADVRVIDCGVLA |
| XP_015423871 | GSQFFITTKPAPHLDGVHVVFGLVISGFEVIEQIENLKTDAA SRPYADVRVIDCGVLA |
| XP_015091833 | GSQFFITTKPAPHLDGVHVVFGLVISGFEVIEQIENLKTDAA SRPYADVRVIDCGVLA |
| XP_010973060 | GSQFFITTKPAPHLDGVHVVFGLVISGFEVIEQIENLKTDAA SRPYADVRVIDCGVLA |
| XP_019583096 | GSQFFITTKPAPHLDGVHVVFGLVISGFEVIEQIENLKTDAA SRPYADVRVIDCGVLA |
| XP_011231111 | GSQFFITTKPAPHLDGVHVVFGLVISGFEVIEQIENLKTDAA SRPYADVRVIDCGVLA |
| XP_014646457 | GSQFFITTKPAPHLDGVHVVFGLVISGFEVIEQIENLKTDAA SRPYADVRVIDCGVLA |



|              |                                                             |
|--------------|-------------------------------------------------------------|
| XP_023988069 | GSQFFITTKPAPHLDGVHVVFGFVVISGFEVIEQIENLKTDAASRPYADVRVIDCGVLA |
| XP_008530970 | GSQFFITTKPAPHLDGVHVVFGFVVISGFEVIEQIENLKTDAASRPYADVRVIDCGVLA |
| XP_017497119 | GSQFFITTKPAPHLDGVHVVFGFVVISGFEVIEQIENLKTDAASRPYADVRVIDCGVLA |
| XP_021503072 | GSQFFITTKPAPHLDGVHVVFGFVVISGFEVIEQIENLKTDAASRPYADVRVIDCGVLA |
| XP_021503071 | GSQFFITTKPAPHLDGVHVVFGFVVISGFEVIEQIENLKTDAASRPYADVRVIDCGVLA |
| XP_020041828 | GSQFFITTKPAPHLDGVHVVFGFVVISGFEVIEQIENLKTDAASRPYADVRVIDCGVLA |
| XP_021503070 | GSQFFITTKPAPHLDGVHVVFGFVVISGFEVIEQIENLKTDAASRPYADVRVIDCGVLA |
| XP_012590780 | GSQFFITTKPAPHLDGVHVVFGFVVISGFEVIEQIENLKTDAASRPYADVRVIDCGVLA |
| XP_019274390 | GSQFFITTKPAPHLDGVHVVFGFVVISGFEVIEQIENLKTDAASRPYADVRVIDCGVLA |
| XP_019489071 | GSQFFITTKPAPHLDGVHVVFGFVVISGFEVIEQIENLKTDAASRPYADVRVIDCGVLA |
| XP_019489063 | GSQFFITTKPAPHLDGVHVVFGFVVISGFEVIEQIENLKTDAASRPYADVRVIDCGVLA |
| XP_010588206 | GSQFFITTKPAPHLDGVHVVFGFVVISGFEVIEQIENLKTDAASRPYADVRVIDCGVLA |
| XP_023403600 | GSQFFITTKPAPHLDGVHVVFGFVVISGFEVIEQIENLKTDAASRPYADVRVIDCGVLA |
| XP_009982730 | GSQFFITTKPAPHLDGVHVVFGFVVISGFEVIEQIENLKTDAASRPYADVRVIDCGVLA |
| XP_019839655 | GSQFFITTKPAPHLDGVHVVFGFVVISGFEVIEQIENLKTDAASRPYADVRVIDCGVLA |
| XP_006512034 | GSQFFITTKPAPHLDGVHVVFGFVVISGFEVIEQIENLKTDAASRPYADVRVIDCGVLA |
| XP_024100264 | GSQFFITTKPAPHLDGVHVVFGFVVISGFEVIEQIENLKTDAASRPYADVRVIDCGVLA |
| XP_019666422 | GSQFFITTKPAPHLDGVHVVFGFVVISGFEVIEQIENLKTDAASRPYADVRVIDCGVLA |
| XP_008530962 | GSQFFITTKPAPHLDGVHVVFGFVVISGFEVIEQIENLKTDAASRPYADVRVIDCGVLA |
| XP_008530967 | GSQFFITTKPAPHLDGVHVVFGFVVISGFEVIEQIENLKTDAASRPYADVRVIDCGVLA |
| XP_010944204 | GSQFFITTKPAPHLDGVHVVFGFVVISGFEVIEQIENLKTDAASRPYADVRVIDCGVLA |
| XP_015091830 | GSQFFITTKPAPHLDGVHVVFGFVVISGFEVIEQIENLKTDAASRPYADVRVIDCGVLA |
| XP_014411884 | GSQFFITTKPAPHLDGVHVVFGFVVISGFEVIEQIENLKTDAASRPYADVRVIDCGVLA |
| XP_010944201 | GSQFFITTKPAPHLDGVHVVFGFVVISGFEVIEQIENLKTDAASRPYADVRVIDCGVLA |
| XP_009443554 | GSQFFITTKPAPHLDGVHVVFGFVVISGFEVIEQIENLKTDAASRPYADVRVIDCGVLA |
| XP_021241242 | GSQFFITTKPAPHLDGVHVVFGFVVISGFEVIEQIENLKTDAASRPYADVRVIDCGVLA |
| XP_020927360 | GSQFFITTKPAPHLDGVHVVFGFVVISGFEVIEQIENLKTDAASRPYADVRVIDCGVLA |
| XP_004581770 | GSQFFITTKPAPHLDGVHVVFGFVVISGFEVIEQIENLKTDAASRPYADVRVIDCGVLA |
| XP_005669469 | GSQFFITTKPAPHLDGVHVVFGFVVISGFEVIEQIENLKTDAASRPYADVRVIDCGVLA |
| XP_009443555 | GSQFFITTKPAPHLDGVHVVFGFVVISGFEVIEQIENLKTDAASRPYADVRVIDCGVLA |
| XP_005669468 | GSQFFITTKPAPHLDGVHVVFGFVVISGFEVIEQIENLKTDAASRPYADVRVIDCGVLA |
| XP_008708042 | GSQFFITTKPAPHLDGVHVVFGFVVISGFEVIEQIENLKTDAASRPYADVRVIDCGVLA |
| AAA37500     | GSQFFITTKPAPHLDGVHVVFGFVVISGFEVIEQIENLKTDAASRPYADVRVIDCGVLA |
| XP_004676331 | GSQFFITTKPAPHLDGVHVVFGFVVISGFEVIEQIENLKTDAASRPYADVRVIDCGVLA |
| XP_006748020 | GSQFFITTKPAPHLDGVHVVFGFVVISGFEVIEQIENLKTDAASRPYADVRVIDCGVLA |
| XP_006770577 | GSQFFITTKPAPHLDGVHVVFGFVVISGFEVIEQIENLKTDAASRPYADVRVIDCGVLA |
| XP_019583095 | GSQFFITTKPAPHLDGVHVVFGFVVISGFEVIEQIENLKTDAASRPYADVRVIDCGVLA |
| XP_015423867 | GSQFFITTKPAPHLDGVHVVFGFVVISGFEVIEQIENLKTDAASRPYADVRVIDCGVLA |
| XP_005383594 | GSQFFITTKPAPHLDGVHVVFGFVVISGFEVIEQIENLKTDAASRPYADVRVIDCGVLA |
| XP_019583089 | GSQFFITTKPAPHLDGVHVVFGFVVISGFEVIEQIENLKTDAASRPYADVRVIDCGVLA |
| XP_014445953 | GSQFFITTKPAPHLDGVHVVFGFVVISGFEVIEQIENLKTDAASRPYADVRVIDCGVLA |
| XP_005891140 | GSQFFITTKPAPHLDGVHVVFGFVVISGFEVIEQIENLKTDAASRPYADVRVIDCGVLA |
| XP_019489104 | GSQFFITTKPAPHLDGVHVVFGFVVISGFEVIEQIENLKTDAASRPYADVRVIDCGVLA |
| XP_012004520 | GSQFFITTKPAPHLDGVHVVFGFVVISGFEVIEQIENLKTDAASRPYADVRVIDCGVLA |
| XP_006051863 | GSQFFITTKPAPHLDGVHVVFGFVVISGFEVIEQIENLKTDAASRPYADVRVIDCGVLA |
| XP_005954297 | GSQFFITTKPAPHLDGVHVVFGFVVISGFEVIEQIENLKTDAASRPYADVRVIDCGVLA |
| XP_005695639 | GSQFFITTKPAPHLDGVHVVFGFVVISGFEVIEQIENLKTDAASRPYADVRVIDCGVLA |
| XP_011954828 | GSQFFITTKPAPHLDGVHVVFGFVVISGFEVIEQIENLKTDAASRPYADVRVIDCGVLA |
| XP_003992255 | GSQFFITTKPAPHLDGVHVVFGFVVISGFEVIEQIENLKTDAASRPYADVRVIDCGVLA |
| XP_002702773 | GSQFFITTKPAPHLDGVHVVFGFVVISGFEVIEQIENLKTDAASRPYADVRVIDCGVLA |
| XP_019666421 | GSQFFITTKPAPHLDGVHVVFGFVVISGFEVIEQIENLKTDAASRPYADVRVIDCGVLA |
| XP_019489077 | GSQFFITTKPAPHLDGVHVVFGFVVISGFEVIEQIENLKTDAASRPYADVRVIDCGVLA |
| XP_012004518 | GSQFFITTKPAPHLDGVHVVFGFVVISGFEVIEQIENLKTDAASRPYADVRVIDCGVLA |
| XP_011954826 | GSQFFITTKPAPHLDGVHVVFGFVVISGFEVIEQIENLKTDAASRPYADVRVIDCGVLA |
| XP_006051860 | GSQFFITTKPAPHLDGVHVVFGFVVISGFEVIEQIENLKTDAASRPYADVRVIDCGVLA |
| XP_005695638 | GSQFFITTKPAPHLDGVHVVFGFVVISGFEVIEQIENLKTDAASRPYADVRVIDCGVLA |
| XP_005196454 | GSQFFITTKPAPHLDGVHVVFGFVVISGFEVIEQIENLKTDAASRPYADVRVIDCGVLA |
| XP_851976    | GSQFFITTKPAPHLDGVHVVFGFVVISGFEVIEQIENLKTDAASRPYADVRVIDCGVLA |

|              |                                                              |
|--------------|--------------------------------------------------------------|
| XP_012520957 | GSQFFITTKPAPHLDGVHVVFGFVLISGFIEVIEQIENLKTDAASRPYADVRVIDCGVLA |
| XP_005634360 | GSQFFITTKPAPHLDGVHVVFGFVLISGFIEVIEQIENLKTDAASRPYADVRVIDCGVLA |
| XP_003132182 | GSQFFITTKPAPHLDGVHVVFGFVLISGFIEVIEQIENLKTDAASRPYADVRVIDCGVLA |
| XP_020139644 | GSQFFITTKPAPHLDGVHVVFGFVLISGFIEVIEQIENLKTDAASRPYADVRVIDCGVLA |
| XP_014715584 | GSQFFITTKPAPHLDGVHVVFGFVLISGFIEVIEQIENLKTDAASRPYADVRVIDCGVLA |
| XP_007193513 | GSQFFITTKPAPHLDGVHVVFGFVLISGFIEVIEQIENLKTDAASRPYADVRVIDCGVLA |
| XP_005669463 | GSQFFITTKPAPHLDGVHVVFGFVLISGFIEVIEQIENLKTDAASRPYADVRVIDCGVLA |
| XP_004419619 | GSQFFITTKPAPHLDGVHVVFGFVLISGFIEVIEQIENLKTDAASRPYADVRVIDCGVLA |
| XP_003363180 | GSQFFITTKPAPHLDGVHVVFGFVLISGFIEVIEQIENLKTDAASRPYADVRVIDCGVLA |
| XP_014986734 | GSQFFITTKPAPHLDGVHVVFGFVLISGFIEVIEQIENLKTDAASRPYADVRVIDCGVLA |
| XP_014715581 | GSQFFITTKPAPHLDGVHVVFGFVLISGFIEVIEQIENLKTDAASRPYADVRVIDCGVLA |
| XP_014646446 | GSQFFITTKPAPHLDGVHVVFGFVLISGFIEVIEQIENLKTDAASRPYADVRVIDCGVLA |
| XP_006893048 | GSQFFITTKPAPHLDGVHVVFGFVLISGFIEVIEQIENLKTDAASRPYADVRVIDCGVLA |
| XP_012625718 | GSQFFITTKPAPHLDGVHVVFGFVLISGFIEVIEQIENLKTDAASRPYADVRVIDCGVLA |
| XP_010973061 | GSQFFITTKPAPHLDGVHVVFGFVLISGFIEVIEQIENLKTDAASRPYADVRVIDCGVLA |
| XP_010944206 | GSQFFITTKPAPHLDGVHVVFGFVLISGFIEVIEQIENLKTDAASRPYADVRVIDCGVLA |
| XP_007193512 | GSQFFITTKPAPHLDGVHVVFGFVLISGFIEVIEQIENLKTDAASRPYADVRVIDCGVLA |
| XP_015091829 | GSQFFITTKPAPHLDGVHVVFGFVLISGFIEVIEQIENLKTDAASRPYADVRVIDCGVLA |
| XP_014411882 | GSQFFITTKPAPHLDGVHVVFGFVLISGFIEVIEQIENLKTDAASRPYADVRVIDCGVLA |
| XP_006770574 | GSQFFITTKPAPHLDGVHVVFGFVLISGFIEVIEQIENLKTDAASRPYADVRVIDCGVLA |
| XP_006770573 | GSQFFITTKPAPHLDGVHVVFGFVLISGFIEVIEQIENLKTDAASRPYADVRVIDCGVLA |
| XP_003809334 | GSQFFITTKPAPHLDGVHVVFGFVLISGFIEVIEQIENLKTDAASRPYADVRVIDCGVLA |
| ELK25111     | GSQFFITTKPAPHLDGVHVVFGFVLISGFIEVIEQIENLKTDAASRPYADVRVIDCGVLA |
| XP_023087260 | GSQFFITTKPAPHLDGVHVVFGFVLISGFIEVIEQIENLKTDAASRPYADVRVIDCGVLA |
| XP_005546833 | GSQFFITTKPAPHLDGVHVVFGFVLISGFIEVIEQIENLKTDAASRPYADVRVIDCGVLA |
| XP_008258471 | GSQFFITTKPAPHLDGVHVVFGFVLISGFIEVIEQIENLKTDAASRPYADVRVIDCGVLA |
| XP_008258470 | GSQFFITTKPAPHLDGVHVVFGFVLISGFIEVIEQIENLKTDAASRPYADVRVIDCGVLA |
| XP_004708608 | GSQFFITTKPAPHLDGVHVVFGFVLISGFIEVIEQIENLKTDAASRPYADVRVIDCGVIA |
| XP_003309783 | GSQFFITTKPAPHLDGVHVVFGFVLISGFIEVIEQIENLKTDAASRPYADVRVIDCGVLA |
| XP_009443557 | GSQFFITTKPAPHLDGVHVVFGFVLISGFIEVIEQIENLKTDAASRPYADVRVIDCGVLA |
| XP_011889503 | GSQFFITTKPAPHLDGVHVVFGFVLISGFIEVIEQIENLKTDAASRPYADVRVIDCGVLA |
| XP_019274386 | GSQFFITTKPAPHLDGVHVVFGFVLISGFIEVIEQIENLKTDAASRPYADVRVIDCGVLA |
| XP_015392541 | GSQFFITTKPAPHLDGVHVVFGFVLISGFIEVIEQIENLKTDAASRPYADVRVIDCGVLA |
| XP_021573498 | GSQFFITTKPAPHLDGVHVVFGFVLISGFIEVIEQIENLKTDAASRPYADVRVIDCGVLA |
| XP_017396461 | GSQFFITTKPAPHLDGVHVVFGFVLISGFIEVIEQIENLKTDAASRPYADVRVIDCGVLA |
| XP_005546834 | GSQFFITTKPAPHLDGVHVVFGFVLISGFIEVIEQIENLKTDAASRPYADVRVIDCGVLA |
| XP_014986732 | GSQFFITTKPAPHLDGVHVVFGFVLISGFIEVIEQIENLKTDAASRPYADVRVIDCGVLA |
| XP_018879079 | GSQFFITTKPAPHLDGVHVVFGFVLISGFIEVIEQIENLKTDAASRPYADVRVIDCGVLA |
| XP_014986735 | GSQFFITTKPAPHLDGVHVVFGFVLISGFIEVIEQIENLKTDAASRPYADVRVIDCGVLA |
| XP_009443553 | GSQFFITTKPAPHLDGVHVVFGFVLISGFIEVIEQIENLKTDAASRPYADVRVIDCGVLA |
| XP_016861963 | GSQFFITTKPAPHLDGVHVVFGFVLISGFIEVIEQIENLKTDAASRPYADVRVIDCGVLA |
| XP_011839703 | GSQFFITTKPAPHLDGVHVVFGFVLISGFIEVIEQIENLKTDAASRPYADVRVIDCGVLA |
| XP_006713234 | GSQFFITTKPAPHLDGVHVVFGFVLISGFIEVIEQIENLKTDAASRPYADVRVIDCGVLA |
| XP_017396460 | GSQFFITTKPAPHLDGVHVVFGFVLISGFIEVIEQIENLKTDAASRPYADVRVIDCGVLA |
| XP_018879080 | GSQFFITTKPAPHLDGVHVVFGFVLISGFIEVIEQIENLKTDAASRPYADVRVIDCGVLA |
| XP_010372621 | GSQFFITTKPAPHLDGVHVVFGFVLISGFIEVIEQIENLKTDAASRPYADVRVIDCGVLA |
| XP_007981992 | GSQFFITTKPAPHLDGVHVVFGFVLISGFIEVIEQIENLKTDAASRPYADVRVIDCGVLA |
| XP_009199351 | GSQFFITTKPAPHLDGVHVVFGFVLISGFIEVIEQIENLKTDAASRPYADVRVIDCGVLA |
| PNJ74565     | GSQFFITTKPAPHLDGVHVVFGFVLISGFIEVIEQIENLKTDAASRPYADVRVIDCGVLA |
| XP_023087259 | GSQFFITTKPAPHLDGVHVVFGFVLISGFIEVIEQIENLKTDAASRPYADVRVIDCGVLA |
| XP_009237437 | GSQFFITTKPAPHLDGVHVVFGFVLISGFIEVIEQIENLKTDAASRPYADVRVIDCGVLA |
| XP_023087256 | GSQFFITTKPAPHLDGVHVVFGFVLISGFIEVIEQIENLKTDAASRPYADVRVIDCGVLA |
| XP_010372620 | GSQFFITTKPAPHLDGVHVVFGFVLISGFIEVIEQIENLKTDAASRPYADVRVIDCGVLA |
| XP_004414069 | GSQFFITTKPAPHLDGVHVVFGFVLISGFIEVIEQIENLKTDAASRPYADVRVIDCGVLA |
| XP_011231109 | GSQFFITTKPAPHLDGVHVVFGFVLISGFIEVIEQIENLKTDAASRPYADVRVIDCGVLA |
| XP_015392540 | GSQFFITTKPAPHLDGVHVVFGFVLISGFIEVIEQIENLKTDAASRPYADVRVIDCGVLA |
| XP_011231110 | GSQFFITTKPAPHLDGVHVVFGFVLISGFIEVIEQIENLKTDAASRPYADVRVIDCGVLA |
| XP_015392538 | GSQFFITTKPAPHLDGVHVVFGFVLISGFIEVIEQIENLKTDAASRPYADVRVIDCGVLA |

|              |                                                              |
|--------------|--------------------------------------------------------------|
| XP_004754311 | GSQFFITTKPAPHLDGVHVVFGFVLISGFIEVIEQIENLKTDAASRPYADVRVIDCGVLA |
| XP_011806342 | GSQFFITTKPAPHLDGVHVVFGFVLISGFIEVIEQIENLKTDAASRPYADVRVIDCGVLA |
| XP_005546832 | GSQFFITTKPAPHLDGVHVVFGFVLISGFIEVIEQIENLKTDAASRPYADVRVIDCGVLA |
| XP_005546835 | GSQFFITTKPAPHLDGVHVVFGFVLISGFIEVIEQIENLKTDAASRPYADVRVIDCGVLA |
| XP_023384831 | GSQFFITTKPAPHLDGVHVVFGFVLISGFIEVIEQIENLKTDAASRPYADVRVIDCGVLA |
| XP_015447191 | GSQFFITTKPAPHLDGVHVVFGFVLISGFIEVIEQIENLKTDAASRPYADVRVIDCGVLA |
| XP_006868826 | GSQFFITTKPAPHLDGVHVVFGFVLISGFIEVIEQIENLKTDAASRPYADVRVIDCGVIA |
| XP_006102363 | GSQFFITTKPAPHLDGVHVVFGFVLISGFIEVIEQIENLKTDAASRPYADVRVIDCGVLA |
| XP_005860445 | GSQFFITTKPAPHLDGVHVVFGFVLISGFIEVIEQIENLKTDAASRPYADVRVIDCGVLA |
| XP_019274385 | GSQFFITTKPAPHLDGVHVVFGFVLISGFIEVIEQIENLKTDAASRPYADVRVIDCGVLA |
| XP_014323127 | GSQFFITTKPAPHLDGVHVVFGFVLISGFIEVIEQIENLKTDAASRPYADVRVIDCGVLA |
| XP_005860444 | GSQFFITTKPAPHLDGVHVVFGFVLISGFIEVIEQIENLKTDAASRPYADVRVIDCGVLA |
| XP_023988067 | GSQFFITTKPAPHLDGVHVVFGFVLISGFIEVIEQIENLKTDAASRPYADVRVIDCGVLA |
| XP_019274384 | GSQFFITTKPAPHLDGVHVVFGFVLISGFIEVIEQIENLKTDAASRPYADVRVIDCGVLA |
| XP_017396459 | GSQFFITTKPAPHLDGVHVVFGFVLISGFIEVIEQIENLKTDAASRPYADVRVIDCGVLA |
| XP_008152845 | GSQFFITTKPAPHLDGVHVVFGFVLISGFIEVIEQIENLKTDAASRPYADVRVIDCGVLA |
| NP_001336053 | GSQFFITTKPAPHLDGVHVVFGFVLISGFIEVIEQIENLKTDAASRPYADVRVIDCGVLA |
| XP_007106821 | GSQFFITTKPAPHLDGVHVVFGFVLISGFIEVIEQIENLKTDAASRPYADVRVIDCGVLA |
| XP_018879078 | GSQFFITTKPAPHLDGVHVVFGFVLISGFIEVIEQIENLKTDAASRPYADVRVIDCGVLA |
| XP_017396458 | GSQFFITTKPAPHLDGVHVVFGFVLISGFIEVIEQIENLKTDAASRPYADVRVIDCGVLA |
| XP_012315533 | GSQFFITTKPAPHLDGVHVVFGFVLISGFIEVIEQIENLKTDAASRPYADVRVIDCGVLA |
| XP_007981991 | GSQFFITTKPAPHLDGVHVVFGFVLISGFIEVIEQIENLKTDAASRPYADVRVIDCGVLA |
| XP_003256959 | GSQFFITTKPAPHLDGVHVVFGFVLISGFIEVIEQIENLKTDAASRPYADVRVIDCGVLA |
| XP_003735136 | GSQFFITTKPAPHLDGVHVVFGFVLISGFIEVIEQIENLKTDAASRPYADVRVIDCGVLA |
| XP_019802415 | GSQFFITTKPAPHLDGVHVVFGFVLISGFIEVIEQIENLKTDAASRPYADVRVIDCGVLA |
| XP_018879076 | GSQFFITTKPAPHLDGVHVVFGFVLISGFIEVIEQIENLKTDAASRPYADVRVIDCGVLA |
| XP_012315532 | GSQFFITTKPAPHLDGVHVVFGFVLISGFIEVIEQIENLKTDAASRPYADVRVIDCGVLA |
| XP_011737181 | GSQFFITTKPAPHLDGVHVVFGFVLISGFIEVIEQIENLKTDAASRPYADVRVIDCGVLA |
| XP_011889502 | GSQFFITTKPAPHLDGVHVVFGFVLISGFIEVIEQIENLKTDAASRPYADVRVIDCGVLA |
| XP_010372619 | GSQFFITTKPAPHLDGVHVVFGFVLISGFIEVIEQIENLKTDAASRPYADVRVIDCGVLA |
| XP_007981990 | GSQFFITTKPAPHLDGVHVVFGFVLISGFIEVIEQIENLKTDAASRPYADVRVIDCGVLA |
| XP_004277919 | GSQFFITTKPAPHLDGVHVVFGFVLISGFIEVIEQIENLKTDAASRPYADVRVIDCGVLA |
| XP_003894654 | GSQFFITTKPAPHLDGVHVVFGFVLISGFIEVIEQIENLKTDAASRPYADVRVIDCGVLA |
| XP_019802412 | GSQFFITTKPAPHLDGVHVVFGFVLISGFIEVIEQIENLKTDAASRPYADVRVIDCGVLA |
| XP_017811031 | GSQFFITTKPAPHLDGVHVVFGFVLISGFIEVIEQIENLKTDAASRPYADVRVIDCGVLA |
| XP_008982345 | GSQFFITTKPAPHLDGVHVVFGFVLISGFIEVIEQIENLKTDAASRPYADVRVIDCGVLA |
| XP_003477052 | GSQFFITTKPAPHLDGVHVVFGFVLISGFIEVIEQIENLKTDAASRPYADVRVIDCGVLA |
| XP_013015643 | GSQFFITTKPAPHLDGVHVVFGFVLISGFIEVIEQIENLKTDAASRPYADVRVIDCGVLA |
| XP_007499863 | GSQFFITTKPAPHLDGVHVVFGFVLISGFIEVIEQIENLKTDAASRPYADVRVIDCGVLV |
| XP_023581750 | GSQFFITTKPAPHLDGVHVVFGFVLISGFIEVIEQIENLKTDAASRPYADVRVIDCGVIA |
| XP_002813940 | GSQFFITTKPAPHLDGVHVVFGFVLISGFIEVIEQIENLKTDAASRPYADVRVIDCGVLA |
| XP_014390380 | GSQFFITTKPAPHLDGVHVVFGFVLISGFIEVIEQIENLKTDAASRPYADVRVIDCGVLA |
| XP_014323126 | GSQFFITTKPAPHLDGVHVVFGFVLISGFIEVIEQIENLKTDAASRPYADVRVIDCGVLA |
| XP_024100262 | GSQFFITTKPAPHLDGVHVVFGFVLISGFIEVIEQIENLKTDAASRPYADVRVIDCGVLA |
| XP_022409524 | GSQFFITTKPAPHLDGVHVVFGFVLISGFIEVIEQIENLKTDAASRPYADVRVIDCGVLA |
| XP_022409523 | GSQFFITTKPAPHLDGVHVVFGFVLISGFIEVIEQIENLKTDAASRPYADVRVIDCGVLA |
| XP_019802414 | GSQFFITTKPAPHLDGVHVVFGFVLISGFIEVIEQIENLKTDAASRPYADVRVIDCGVLA |
| XP_021062318 | GSQFFITTKPAPHLDGVHVVFGFVLISGFIEVIEQIENLKTDAASRPYADVRVIDCGVLA |
| XP_014390377 | GSQFFITTKPAPHLDGVHVVFGFVLISGFIEVIEQIENLKTDAASRPYADVRVIDCGVLA |
| XP_014323123 | GSQFFITTKPAPHLDGVHVVFGFVLISGFIEVIEQIENLKTDAASRPYADVRVIDCGVLA |
| XP_011889501 | GSQFFITTKPAPHLDGVHVVFGFVLISGFIEVIEQIENLKTDAASRPYADVRVIDCGVLA |
| XP_015344917 | GSQFFITTKPAPHLDGVHVVFGFVLISGFIEVIEQIENLKTDAASRPYADVRVIDCGVLA |
| XP_011889500 | GSQFFITTKPAPHLDGVHVVFGFVLISGFIEVIEQIENLKTDAASRPYADVRVIDCGVLA |
| XP_016018800 | GSQFFITTKPAPHLDGVHVVFGFVLISGFIEVIEQIENLKTDAASRPYADVRVIDCGVLA |
| XP_019802413 | GSQFFITTKPAPHLDGVHVVFGFVLISGFIEVIEQIENLKTDAASRPYADVRVIDCGVLA |
| XP_023581752 | GSQFFITTKPAPHLDGVHVVFGFVLISGFIEVIEQIENLKTDAASRPYADVRVIDCGVIA |
| XP_008847679 | GSQFFITTKPAPHLDGVHVVFGFVLISGFIEVIEQIENLKTDAASRPYADVRVIDCGVLA |
| XP_016018799 | GSQFFITTKPAPHLDGVHVVFGFVLISGFIEVIEQIENLKTDAASRPYADVRVIDCGVLA |

|              |                                                              |
|--------------|--------------------------------------------------------------|
| XP_016018798 | GSQFFITTKPAPHLDGVHVVFGFVVISGFEVIEQIENLKTDAASRPYADVRVIDCGVLA  |
| XP_017497112 | GSQFFITTKPAPHLDGVHVVFGFVVISGFEVIEQIENLKTDAASRPYADVRVIDCGVLA  |
| XP_023371677 | GSQFFITTKPAPHLDGVHVVFGFVVISGFEVIEQIENLKTDAASRPYADVRVIDCGVLA  |
| XP_007947878 | GSQFFITTKPAPHLDGVHVVFGFVVISGFEVIEQIENLKTDAASRPYADVRVIDCGVLA  |
| XP_007445750 | GSQFFITTKPAPHLDGVHVVFGFVVISGFEVIEQIENLKTDAASRPYADVRVIDCGVLA  |
| XP_011889497 | GSQFFITTKPAPHLDGVHVVFGFVVISGFEVIEQIENLKTDAASRPYADVRVIDCGVLA  |
| XP_020854834 | GSQFFITTKPAPHLDGVHVVFGFVVISGFEVIEQIENLKTDAASRPYADVRVIDCGVLV  |
| XP_012315531 | GSQFFITTKPAPHLDGVHVVFGFVVISGFEVIEQIENLKTDAASRPYADVRVIDCGVLA  |
| XP_020854833 | GSQFFITTKPAPHLDGVHVVFGFVVISGFEVIEQIENLKTDAASRPYADVRVIDCGVLV  |
| XP_012315530 | GSQFFITTKPAPHLDGVHVVFGFVVISGFEVIEQIENLKTDAASRPYADVRVIDCGVLA  |
| XP_022409521 | GSQFFITTKPAPHLDGVHVVFGFVVISGFEVIEQIENLKTDAASRPYADVRVIDCGVLA  |
| XP_023384830 | GSQFFITTKPAPHLDGVHVVFGFVVISGFEVIEQIENLKTDAASRPYADVRVIDCGVLA  |
| XP_020041827 | GSQFFITTKPAPHLDGVHVVFGFVVISGFEVIEQIENLKTDAASRPYADVRVIDCGVLA  |
| XP_015344916 | GSQFFITTKPAPHLDGVHVVFGFVVISGFEVIEQIENLKTDAASRPYADVRVIDCGVLA  |
| XP_008847678 | GSQFFITTKPAPHLDGVHVVFGFVVISGFEVIEQIENLKTDAASRPYADVRVIDCGVLA  |
| XP_015344914 | GSQFFITTKPAPHLDGVHVVFGFVVISGFEVIEQIENLKTDAASRPYADVRVIDCGVLA  |
| XP_008847677 | GSQFFITTKPAPHLDGVHVVFGFVVISGFEVIEQIENLKTDAASRPYADVRVIDCGVLA  |
| XP_005337989 | GSQFFITTKPAPHLDGVHVVFGFVVISGFEVIEQIENLKTDAASRPYADVRVIDCGVLA  |
| XP_021590709 | GSQFFITTKPAPHLDGVHVVFGFVVISGFEVIEQIENLKTDAASRPYADVRVIDCGVLA  |
| XP_022409522 | GSQFFITTKPAPHLDGVHVVFGFVVISGFEVIEQIENLKTDAASRPYADVRVIDCGVLA  |
| XP_021590708 | GSQFFITTKPAPHLDGVHVVFGFVVISGFEVIEQIENLKTDAASRPYADVRVIDCGVLA  |
| XP_021027182 | GSQFFITTKPAPHLDGVHVVFGFVVISGFEVIEQIENLKTDAASRPYADVRVIDCGVLA  |
| XP_006914886 | GSQFFITTKPAPHLDGVHVVFGFVVISGFEVIEQIENLKTDAASRPYADVRVIDCGVLA  |
| XP_011355685 | GSQFFITTKPAPHLDGVHVVFGFVVISGFEVIEQIENLKTDAASRPYADVRVIDCGVLA  |
| XP_023384828 | GSQFFITTKPAPHLDGVHVVFGFVVISGFEVIEQIENLKTDAASRPYADVRVIDCGVLA  |
| XP_006914885 | GSQFFITTKPAPHLDGVHVVFGFVVISGFEVIEQIENLKTDAASRPYADVRVIDCGVLA  |
| XP_012663507 | GSQFFITTKPAPHLDGVHVVFGFVVISGFEVIEQIENLKTDAASRPYADVRVIDCGVLA  |
| XP_012663506 | GSQFFITTKPAPHLDGVHVVFGFVVISGFEVIEQIENLKTDAASRPYADVRVIDCGVLA  |
| XP_017497113 | GSQFFITTKPAPHLDGVHVVFGFVVISGFEVIEQIENLKTDAASRPYADVRVIDCGVLA  |
| XP_016051563 | GSQFFITTKPAPHLDGVHVVFGFVVISGFEVIEQIENLKTDAASRPYADVRVIDCGVLA  |
| XP_017497111 | GSQFFITTKPAPHLDGVHVVFGFVVISGFEVIEQIENLKTDAASRPYADVRVIDCGVLA  |
| XP_017497110 | GSQFFITTKPAPHLDGVHVVFGFVVISGFEVIEQIENLKTDAASRPYADVRVIDCGVLA  |
| XP_012315529 | GSQFFITTKPAPHLDGVHVVFGFVVISGFEVIEQIENLKTDAASRPYADVRVIDCGVLA  |
| XP_020728074 | GSQFFITTKPAPHLDGVHVVFGFVVISGFEVIEQIENLKTDAASRPYADVRVIDCGVLA  |
| XP_012315528 | GSQFFITTKPAPHLDGVHVVFGFVVISGFEVIEQIENLKTDAASRPYADVRVIDCGVLA  |
| XP_020728073 | GSQFFITTKPAPHLDGVHVVFGFVVISGFEVIEQIENLKTDAASRPYADVRVIDCGVLA  |
| XP_021062319 | GSQFFITTKPAPHLDGVHVVFGFVVISGFEVIEQIENLKTDAASRPYADVRVIDCGVLA  |
| XP_021027181 | GSQFFITTKPAPHLDGVHVVFGFVVISGFEVIEQIENLKTDAASRPYADVRVIDCGVLA  |
| XP_021027180 | GSQFFITTKPAPHLDGVHVVFGFVVISGFEVIEQIENLKTDAASRPYADVRVIDCGVLA  |
| XP_004835151 | GSQFFITTKPAPHLDGVHVVFGFVVISGFEVIEQIENLKTDAASRPYADVRVIDCGVLA  |
| XP_012928271 | GSQFFITTKPAPHLDGVHVVFGFVVISGFEVIEQIENLKTDAASRPYADVRVIDCGVLA  |
| XP_021590705 | GSQFFITTKPAPHLDGVHVVFGFVVISGFEVIEQIENLKTDAASRPYADVRVIDCGVLA  |
| XP_011241241 | GSQFFITTKPAPHLDGVHVVFGFVVISGFEVIEQIENLKTDAASRPYADVRVIDCGVLA  |
| NP_035048    | GSQFFITTKPAPHLDGVHVVFGFVVISGFEVIEQIENLKTDAASRPYADVRVIDCGVLA  |
| XP_017168694 | GSQFFITTKPAPHLDGVHVVFGFVVISGFEVIEQIENLKTDAASRPYADVRVIDCGVLA  |
| XP_005348185 | GSQFFITTKPAPHLDGVHVVFGFVVISGFEVIEQIENLKTDAASRPYADVRVIDCGVLA  |
| XP_005082370 | GSQFFITTKPAPHLDGVHVVFGFVVISGFEVIEQIENLKTDAASRPYADVRVIDCGVLA  |
| XP_021503066 | GSQFFITTKPAPHLDGVHVVFGFVVISGFEVIEQIENLKTDAASRPYADVRVIDCGVIA  |
| XP_021503065 | GSQFFITTKPAPHLDGVHVVFGFVVISGFEVIEQIENLKTDAASRPYADVRVIDCGVIA  |
| XP_021503062 | GSQFFITTKPAPHLDGVHVVFGFVVISGFEVIEQIENLKTDAASRPYADVRVIDCGVIA  |
| XP_021503063 | GSQFFITTKPAPHLDGVHVVFGFVVISGFEVIEQIENLKTDAASRPYADVRVIDCGVIA  |
| XP_008568057 | GSQFFITTKPAPHLDGVHVVFGFVVISGFEI IKQIENLKTDAASRPYADVRVIDCGVLA |
| XP_008568056 | GSQFFITTKPAPHLDGVHVVFGFVVISGFEI IKQIENLKTDAASRPYADVRVIDCGVLA |
| XP_006120664 | GSQFFITTKPAPHLDGVHVVFGFVVISGFEVIEQIENLKTDTASRPYADVRVIDCGVLV  |
| XP_007055629 | GSQFFITTKPAPHLDGVHVVFGFVVISGFEVIEQIENLKTDTASRPYADVRVIDCGVLV  |
| XP_006120661 | GSQFFITTKPAPHLDGVHVVFGFVVISGFEVIEQIENLKTDTASRPYADVRVIDCGVLV  |
| XP_006120659 | GSQFFITTKPAPHLDGVHVVFGFVVISGFEVIEQIENLKTDTASRPYADVRVIDCGVLV  |
| XP_007106819 | GSQFFITTKPAPHLDGVHVVFGFVVISGFEVIEQIENLKTDAASRPYADVRVIDCGVLA  |

|              |                                                            |
|--------------|------------------------------------------------------------|
| XP_015708506 | GSQFFITTKPAPHLDGVHVVFGFVVISGFEVIEQIENLKTDASRPYADVRVIDCGVLV |
| XP_009682494 | GSQFFITTKPAPHLDGVHVVFGFVVISGFEVIEQIENLKTDASRPYADVRVIDCGVLV |
| XP_009682493 | GSQFFITTKPAPHLDGVHVVFGFVVISGFEVIEQIENLKTDASRPYADVRVIDCGVLV |
| XP_009682492 | GSQFFITTKPAPHLDGVHVVFGFVVISGFEVIEQIENLKTDASRPYADVRVIDCGVLV |
| XP_009682491 | GSQFFITTKPAPHLDGVHVVFGFVVISGFEVIEQIENLKTDASRPYADVRVIDCGVLV |
| XP_019471734 | GSQFFITTKPAPHLDGVHVVFGFVVISGFEVIEQIENLKTDASRPYADVRVIDCGVLV |
| XP_010710549 | GSQFFITTKPAPHLDGVHVVFGFVVISGFEVIEQIENLKTDASRPYADVRVIDCGVLV |
| XP_010710548 | GSQFFITTKPAPHLDGVHVVFGFVVISGFEVIEQIENLKTDASRPYADVRVIDCGVLV |
| XP_015136632 | GSQFFITTKPAPHLDGVHVVFGFVVISGFEVIEQIENLKTDASRPYADVRVIDCGVLV |
| XP_004939132 | GSQFFITTKPAPHLDGVHVVFGFVVISGFEVIEQIENLKTDASRPYADVRVIDCGVLV |
| XP_004939131 | GSQFFITTKPAPHLDGVHVVFGFVVISGFEVIEQIENLKTDASRPYADVRVIDCGVLV |
| XP_013795593 | GSQFFITTKPAPHLDGVHVVFGFVVISGFEVIEQIENLKTDASRPYADVRVIDCGVLV |
| XP_019363610 | GSQFFITTKPAPHLDGVHVVFGFVVISGFEVIEQIENLKTDASRPYADVRVIDCGVVI |
| XP_014376468 | GSQFFITTKPAPHLDGVHVVFGFVVISGFEVIEQIENLKTDASRPYADVRVIDCGVVI |
| XP_007659513 | GSQFFITTKPAPHLDGVHVVFGFVVISGFEVIEQIENLKTDASRPYADVRVIDCGVLI |
| XP_021241246 | GSQFFITTKPAPHLDGVHVVFGFVVISGFEVIEQIENLKTDASRPYADVRVIDCGVLV |
| XP_021241236 | GSQFFITTKPAPHLDGVHVVFGFVVISGFEVIEQIENLKTDASRPYADVRVIDCGVLV |
| XP_021241235 | GSQFFITTKPAPHLDGVHVVFGFVVISGFEVIEQIENLKTDASRPYADVRVIDCGVLV |
| XP_017731869 | GSQFFITTKPAPHLDGVHVVFGFVVISGFEVIEQIENLKTDASRPYADVRVIDCGVLA |
| XP_012426793 | GSQFFITTKPAPHLDGVHVVFGFVVISGFEVIEQIENLKTDASRPYADVRVIDCGVLV |
| XP_017944741 | GSQFFITTKPAPHLDGVHVVFGFVVISGFEVIEQIENLKTDASRPYADVRVIDCGVLV |
| XP_017944740 | GSQFFITTKPAPHLDGVHVVFGFVVISGFEVIEQIENLKTDASRPYADVRVIDCGVLV |
| XP_010393085 | GSQFFITTKPAPHLDGVHVVFGFVVISGFEVIEQIENLKTDASRPYADVRVIDCGVLV |
| XP_017685518 | GSQFFITTKPAPHLDGVHVVFGFVVISGFEVIEQIENLKTDASRPYADVRVIDCGVLV |
| XP_017602246 | GSQFFITTKPAPHLDGVHVVFGFVVISGFEVIEQIENLKTDASRPYADVRVIDCGVLV |
| XP_016151723 | GSQFFITTKPAPHLDGVHVVFGFVVISGFEVIEQIENLKTDASRPYADVRVIDCGVLV |
| XP_019138709 | GSQFFITTKPAPHLDGVHVVFGFVVISGFEVIEQIENLKTDASRPYADVRVIDCGVLV |
| XP_017685517 | GSQFFITTKPAPHLDGVHVVFGFVVISGFEVIEQIENLKTDASRPYADVRVIDCGVLV |
| XP_017602245 | GSQFFITTKPAPHLDGVHVVFGFVVISGFEVIEQIENLKTDASRPYADVRVIDCGVLV |
| XP_005040539 | GSQFFITTKPAPHLDGVHVVFGFVVISGFEVIEQIENLKTDASRPYADVRVIDCGVLV |
| XP_005040538 | GSQFFITTKPAPHLDGVHVVFGFVVISGFEVIEQIENLKTDASRPYADVRVIDCGVLV |
| XP_005040537 | GSQFFITTKPAPHLDGVHVVFGFVVISGFEVIEQIENLKTDASRPYADVRVIDCGVLV |
| XP_014800495 | GSQFFITTKPAPHLDGVHVVFGFVVISGFEVIEQIENLKTDASRPYADVRVIDCGVLV |
| XP_008168983 | GSQFFITTKPAPHLDGVHVVFGFVVISGFEVIEQIENLKTDASRPYADVRVIDCGVLV |
| XP_017944739 | GSQFFITTKPAPHLDGVHVVFGFVVISGFEVIEQIENLKTDASRPYADVRVIDCGVLV |
| XP_014729203 | GSQFFITTKPAPHLDGVHVVFGFVVISGFEVIEQIENLKTDASRPYADVRVIDCGVLV |
| XP_017944736 | GSQFFITTKPAPHLDGVHVVFGFVVISGFEVIEQIENLKTDASRPYADVRVIDCGVLV |
| XP_014729201 | GSQFFITTKPAPHLDGVHVVFGFVVISGFEVIEQIENLKTDASRPYADVRVIDCGVLV |
| XP_010393084 | GSQFFITTKPAPHLDGVHVVFGFVVISGFEVIEQIENLKTDASRPYADVRVIDCGVLV |
| XP_017944735 | GSQFFITTKPAPHLDGVHVVFGFVVISGFEVIEQIENLKTDASRPYADVRVIDCGVLV |
| XP_017685520 | GSQFFITTKPAPHLDGVHVVFGFVVISGFEVIEQIENLKTDASRPYADVRVIDCGVLV |
| XP_017602244 | GSQFFITTKPAPHLDGVHVVFGFVVISGFEVIEQIENLKTDASRPYADVRVIDCGVLV |
| XP_014729200 | GSQFFITTKPAPHLDGVHVVFGFVVISGFEVIEQIENLKTDASRPYADVRVIDCGVLV |
| XP_010393082 | GSQFFITTKPAPHLDGVHVVFGFVVISGFEVIEQIENLKTDASRPYADVRVIDCGVLV |
| XP_017685515 | GSQFFITTKPAPHLDGVHVVFGFVVISGFEVIEQIENLKTDASRPYADVRVIDCGVLV |
| XP_017602242 | GSQFFITTKPAPHLDGVHVVFGFVVISGFEVIEQIENLKTDASRPYADVRVIDCGVLV |
| XP_017602241 | GSQFFITTKPAPHLDGVHVVFGFVVISGFEVIEQIENLKTDASRPYADVRVIDCGVLV |
| KFP58102     | GSQFFITTKPAPHLDGVHVVFGFVVISGFEVIEQIENLKTDASRPYADVRVIDCGVLV |
| XP_010393081 | GSQFFITTKPAPHLDGVHVVFGFVVISGFEVIEQIENLKTDASRPYADVRVIDCGVLV |
| XP_017685514 | GSQFFITTKPAPHLDGVHVVFGFVVISGFEVIEQIENLKTDASRPYADVRVIDCGVLV |
| XP_017602240 | GSQFFITTKPAPHLDGVHVVFGFVVISGFEVIEQIENLKTDASRPYADVRVIDCGVLV |
| XP_010559721 | GSQFFITTKPAPHLDGVHVVFGFVVISGFEVIEQIENLKTDASRPYADVRVIDCGVLV |
| XP_014800494 | GSQFFITTKPAPHLDGVHVVFGFVVISGFEVIEQIENLKTDASRPYADVRVIDCGVLV |
| XP_011571332 | GSQFFITTKPAPHLDGVHVVFGFVVISGFEVIEQIENLKTDASRPYADVRVIDCGVLV |
| XP_010559712 | GSQFFITTKPAPHLDGVHVVFGFVVISGFEVIEQIENLKTDASRPYADVRVIDCGVLV |
| XP_009331567 | GSQFFITTKPAPHLDGVHVVFGFVVISGFEVIEQIENLKTDASRPYADVRVIDCGVLV |
| XP_008492672 | GSQFFITTKPAPHLDGVHVVFGFVVISGFEVIEQIENLKTDASRPYADVRVIDCGVLV |
| XP_014800492 | GSQFFITTKPAPHLDGVHVVFGFVVISGFEVIEQIENLKTDASRPYADVRVIDCGVLV |

XP\_011571324 GSQFFITTKPAPHLDGVHVVFGFVVISGFEVIEQIENLKTDASRPYADVRVIDCGVLV  
XP\_009697766 GSQFFITTKPAPHLDGVHVVFGFVVISGFEVIEQIENLKTDASRPYADVRVIDCGVLV  
XP\_009331566 GSQFFITTKPAPHLDGVHVVFGFVVISGFEVIEQIENLKTDASRPYADVRVIDCGVLV  
XP\_009274213 GSQFFITTKPAPHLDGVHVVFGFVVISGFEVIEQIENLKTDASRPYADVRVIDCGVLV  
XP\_014800491 GSQFFITTKPAPHLDGVHVVFGFVVISGFEVIEQIENLKTDASRPYADVRVIDCGVLV  
XP\_010301634 GSQFFITTKPAPHLDGVHVVFGFVVISGFEVIEQIENLKTDASRPYADVRVIDCGVLV  
XP\_008168980 GSQFFITTKPAPHLDGVHVVFGFVVISGFEVIEQIENLKTDASRPYADVRVIDCGVLV  
XP\_023963187 GSQFFITTKPAPHLDGVHVVFGFVVISGFEVIEQIENLKTDASRPYADVRVIDCGVLV  
XP\_005150066 GSQFFITTKPAPHLDGVHVVFGFVVISGFEVIEQIENLKTDASRPYADVRVIDCGVLV  
XP\_009473612 GSQFFITTKPAPHLDGVHVVFGFVVISGFEVIEQIENLKTDASRPYADVRVIDCGVLV  
XP\_021393646 GSQFFITTKPAPHLDGVHVVFGFVVISGFEVIEQIENLKTDASRPYADVRVIDCGVLV  
XP\_021393642 GSQFFITTKPAPHLDGVHVVFGFVVISGFEVIEQIENLKTDASRPYADVRVIDCGVLV  
XP\_021393643 GSQFFITTKPAPHLDGVHVVFGFVVISGFEVIEQIENLKTDASRPYADVRVIDCGVLV  
XP\_009878793 GSQFFITTKPAPHLDGVHVVFGFVVISGFEVIEQIENLKTDASRPYADVRVIDCGVLV  
XP\_021393641 GSQFFITTKPAPHLDGVHVVFGFVVISGFEVIEQIENLKTDASRPYADVRVIDCGVLV  
XP\_018764676 GSQFFITTKPAPHLDGVHVVFGFVVISGFEVIEQIENLKTDASRPYADVRVIDCGVLV  
XP\_018764674 GSQFFITTKPAPHLDGVHVVFGFVVISGFEVIEQIENLKTDASRPYADVRVIDCGVLV  
XP\_018764673 GSQFFITTKPAPHLDGVHVVFGFVVISGFEVIEQIENLKTDASRPYADVRVIDCGVLV  
KFV02250 GSQFFITTKPAPHLDGVHVVFGFVVISGFEVIEQIENLKTDASRPYADVRVIDCGVLV  
XP\_014125627 GSQFFITTKPAPHLDGVHVVFGFVVISGFEVIEQIENLKTDASRPYADVRVIDCGVLL  
XP\_010083448 GSQFFITTKPAPHLDGVHVVFGFVVISGFEVIEQIENLKTDASRPYADVRVIDCGVLV  
XP\_014125626 GSQFFITTKPAPHLDGVHVVFGFVVISGFEVIEQIENLKTDASRPYADVRVIDCGVLL  
XP\_014112250 GSQFFITTKPAPHLDGVHVVFGFVVISGFEVIEQIENLKTDASRPYADVRVIDCGVLV  
XP\_014112249 GSQFFITTKPAPHLDGVHVVFGFVVISGFEVIEQIENLKTDASRPYADVRVIDCGVLV  
XP\_014125625 GSQFFITTKPAPHLDGVHVVFGFVVISGFEVIEQIENLKTDASRPYADVRVIDCGVLL  
XP\_014112248 GSQFFITTKPAPHLDGVHVVFGFVVISGFEVIEQIENLKTDASRPYADVRVIDCGVLV  
XP\_005428264 GSQFFITTKPAPHLDGVHVVFGFVVISGFEVIEQIENLKTDASRPYADVRVIDCGVLV  
XP\_015474510 GSQFFITTKPAPHLDGVHVVFGFVVISGFEVIEQIENLKTDASRPYADVRVIDCGVLV  
XP\_023777798 GSQFFITTKPAPHLDGVHVVFGFVVISGFEVIEQIENLKTDASRPYADVRVIDCGVLV  
XP\_015474508 GSQFFITTKPAPHLDGVHVVFGFVVISGFEVIEQIENLKTDASRPYADVRVIDCGVLV  
XP\_023777797 GSQFFITTKPAPHLDGVHVVFGFVVISGFEVIEQIENLKTDASRPYADVRVIDCGVLV  
XP\_023777796 GSQFFITTKPAPHLDGVHVVFGFVVISGFEVIEQIENLKTDASRPYADVRVIDCGVLV  
XP\_015474507 GSQFFITTKPAPHLDGVHVVFGFVVISGFEVIEQIENLKTDASRPYADVRVIDCGVLV  
XP\_023777795 GSQFFITTKPAPHLDGVHVVFGFVVISGFEVIEQIENLKTDASRPYADVRVIDCGVLV  
KFQ42818 GSQFFITTKPAPHLDGVHVVFGFVVISGFEVIEQIENLKTDASRPYADVRVIDCGVLV  
XP\_019355067 GSQFFITTKPAPHLDSVHVVFGFVVISGFEVIEQIENLKTDASRPYADVRVIDCGVVI  
XP\_010014722 GSQFFITTKPAPHLDGVHVVFGFVVISGFEVIEQIENLKTDASRPYADVRVIDCGVLV  
XP\_009556564 GSQFFITTKPAPHLDGVHVVFGFVVISGFEVIEQIENLKTDASRPYADVRVIDCGVLV  
XP\_009993002 GSQFFITTKPAPHLDGVHVVFGFVVISGFEVIEQIENLKTDASRPYADVRVIDCGVLV  
XP\_009896433 GSQFFITTKPAPHLDGVHVVFGFVVISGFEVIEQIENLKTDASRPYADVRVIDCGVLV  
XP\_010213065 GSQFFITTKPAPHLDGVHVVFGFVVISGFEVIEQIENLKTDASRPYADVRVIDCGVLV  
XP\_019384731 GSQFFITTKPAPHLDGVHVVFGFVVISGFEVIEQIENLKTDASRPYADVRVIDCGVVI  
XP\_008110438 GSQFFITTKPAPHLDGVHVVFGFVVISGFEVIEQIENLKTDASRPYADVRVIDCGVLV  
XP\_008110436 GSQFFITTKPAPHLDGVHVVFGFVVISGFEVIEQIENLKTDASRPYADVRVIDCGVLV  
XP\_015264278 GSQFFITTKPAPHLDNVHVVFGFVVISGFEVIEQIENLKTDASRPYADVRVIDCGVLV  
XP\_013917336 GSQFFITTKPAPHLDSVHVVFGFVVISGFEVIEQIENLKTDASRPYADVRVIDCGVLV  
XP\_020670421 GSQFFITTKPAPHLDGVHVVFGFVVISGFEVIEQIENLKTDASRPYADVRVIDCGVLV  
XP\_020670420 GSQFFITTKPAPHLDGVHVVFGFVVISGFEVIEQIENLKTDASRPYADVRVIDCGVLV  
XP\_015667896 GSQFFITTKPAPHLDSVHVVFGFVVISGFEVIEQIENLKTDASRPYADVRVIDCGVLV  
XP\_007443413 GSQFFITTKPAPHLDGVHVVFGFVVISGFEVIEQIENLKTDASRPYADVRVIDCGVLV  
XP\_007443411 GSQFFITTKPAPHLDGVHVVFGFVVISGFEVIEQIENLKTDASRPYADVRVIDCGVLV  
XP\_017451684 GSQFFITTKPAPHLDGVHVVFGFVVISGFEVIEQIENLKTDASRPYADVRVIDCGVLA  
XP\_014918330 GSQFFITTKPAPHLDGVHVVFGFVVISGFEVIEQIENLKTDASRPYADVRVIDCGVLA  
XP\_002939352 GSQFFITTKAAPHLDGVHVVFGFVVISGFEVIEQIESLKTDASRPYADVRVIDCGLLV  
XP\_018124467 GSQFFITTKAAPHLDGVHVVFGFVVISGFEVIEQIESLKTDASRPYADVRVIDCGLLL  
XP\_017572959 GSQFFITTKPAPHLDGVHVVFGFVVISGFEVIEQIECLKTDSASRPYADVRVIDCGQLI  
XP\_018607018 GSQFFITTKTAPHLDGVHVVFGFVVISGFEVIEQIECLKTDSASRPYADVRVIDCGQLI  
XP\_018607016 GSQFFITTKTAPHLDGVHVVFGFVVISGFEVIEQIECLKTDSASRPYADVRVIDCGQLI

|              |                                                             |
|--------------|-------------------------------------------------------------|
| XP_007544596 | GSQFFITTKMAPHLDGHVHVFGFLVISGFVIEKKIEGLKTDASRPYADVRVDCGQLI   |
| XP_018607022 | GSQFFITTKTAPHLDGHVHVFGFLVISGFVIEKQIECLKTDASRPYADVRVIDCGQLI  |
| XP_009443552 | GSQFFM-----VHVVFGLVISGFVIEQIENLKTDAASRPYADVRVIDCGVLA        |
| PNJ74568     | GSQFFM-----VHVVFGLVISGFVIEQIENLKTDAASRPYADVRVIDCGVLA        |
| PNJ74566     | GSQFFM-----VHVVFGLVISGFVIEQIENLKTDAASRPYADVRVIDCGVLA        |
| XP_018122561 | GSQFFITTKAAPHLDGHVHVFGFLVISGFVIERIESLKSDASRPYADVRVIDCGLLV   |
| XP_012735608 | GSQFFITTKMAPHLDGHVHVFGFLVISGFVIEKKIEKLKTDASRPYADVRVDCGQLI   |
| XP_022065410 | GSQFFITTKMAPHLDGHVHVFGFLVISGFVIEKKIEGLKTDASRPYADVRVDCGQLI   |
| XP_023122049 | GSQFFITTKMAPHLDGHVHVFGFLVISGFVIEKKIEGLKTDASRPYADVRVDCGQLI   |
| XP_022065408 | GSQFFITTKMAPHLDGHVHVFGFLVISGFVIEKKIEGLKTDASRPYADVRVDCGQLI   |
| XP_023122045 | GSQFFITTKMAPHLDGHVHVFGFLVISGFVIEKKIEGLKTDASRPYADVRVDCGQLI   |
| XP_022065407 | GSQFFITTKMAPHLDGHVHVFGFLVISGFVIEKKIEGLKTDASRPYADVRVDCGQLI   |
| XP_022065406 | GSQFFITTKMAPHLDGHVHVFGFLVISGFVIEKKIEGLKTDASRPYADVRVDCGQLI   |
| XP_023122044 | GSQFFITTKMAPHLDGHVHVFGFLVISGFVIEKKIEGLKTDASRPYADVRVDCGQLI   |
| XP_022065405 | GSQFFITTKMAPHLDGHVHVFGFLVISGFVIEKKIEGLKTDASRPYADVRVDCGQLI   |
| XP_023122043 | GSQFFITTKMAPHLDGHVHVFGFLVISGFVIEKKIEGLKTDASRPYADVRVDCGQLI   |
| XP_018414151 | GSQFFITTKPAAPHLDGHVHVFGFLVISGFVIEQIENQKSDASRPYADVRVDCGLVG   |
| XP_023490562 | GSQFFITTKPAPHLDGHVHVFGFLVISGFVIEQIENLKTDAASRPYADVRVIDCGVLA  |
| XP_008304546 | GSQFFITTKMAPHLDGHVHVFGFLVISGFVIEKKIEGLKTDASRPYADVRVDCGQLI   |
| KKF16876     | GSQFFITTKMAPHLDGHVHVFGVVISGFVIEKKIEGLKTDASRPYADVRVDCGQLI    |
| XP_008304545 | GSQFFITTKMAPHLDGHVHVFGFLVISGFVIEKKIEGLKTDASRPYADVRVDCGQLI   |
| XP_015249666 | GSQFFITTRMAPHLDGHVHVFGFLVISGFVIEKKIEKLKTDASRPYADVRVDCGQLI   |
| XP_018529332 | GSQFFITTKMAPHLDGHVHVFGFLVISGFVIEKKIEGLKTDASRPYADVRVDCGQLI   |
| XP_018529331 | GSQFFITTKMAPHLDGHVHVFGFLVISGFVIEKKIEGLKTDASRPYADVRVDCGQLI   |
| XP_010751380 | GSQFFITTKMAPHLDGHVHVFGVVISGFVIEKKIEGLKTDASRPYADVRVDCGQLI    |
| XP_010751371 | GSQFFITTKMAPHLDGHVHVFGVVISGFVIEKKIEGLKTDASRPYADVRVDCGQLI    |
| XP_019745550 | GSQFFITTKMAPHLDGHVHVFGFLVISGFVIEKKIEGLKTDASRPYADVRVDCGQLI   |
| XP_010751365 | GSQFFITTKMAPHLDGHVHVFGVVISGFVIEKKIEGLKTDASRPYADVRVDCGQLI    |
| XP_019745545 | GSQFFITTKMAPHLDGHVHVFGFLVISGFVIEKKIEGLKTDASRPYADVRVDCGQLI   |
| XP_023263705 | GSQFFITTKMAPHLDGHVHVFGFLVISGFVIEKKIEGLKTDASRPYADVRVDCGQLI   |
| XP_023263706 | GSQFFITTKMAPHLDGHVHVFGFLVISGFVIEKKIEGLKTDASRPYADVRVDCGQLI   |
| XP_001338072 | GSQFFITTKTAPHLDGHVHVFGFLVISGFVIEKKNIEGLKTDASRPYADVRVIDCGQLI |
| XP_022599954 | GSQFFITTKMAPHLDGHVHVFGFLVISGFVIEKKIEGLKTDASRPYADVRVDCGQLI   |
| XP_019897364 | GSQFFITTKTAPHLDGHVHVFGFLVISGFVVKRIEGLKTDGASRPYADVRVDCGQLI   |
| XP_010900666 | GSQFFITTKTAPHLDGHVHVFGFLVISGFVVKRIEGLKTDGASRPYADVRVDCGQLI   |
| XP_010900665 | GSQFFITTKTAPHLDGHVHVFGFLVISGFVVKRIEGLKTDGASRPYADVRVDCGQLI   |
| XP_010900664 | GSQFFITTKTAPHLDGHVHVFGFLVISGFVVKRIEGLKTDGASRPYADVRVDCGQLI   |
| XP_019897363 | GSQFFITTKTAPHLDGHVHVFGFLVISGFVVKRIEGLKTDGASRPYADVRVDCGQLI   |
| XP_010167755 | GSQFFITTKPAPHLDGHVHVFGFLVISGFVIEQIENLKTDTASRPYADVRVIDCGVLV  |
| XP_010900668 | GSQFFITTKTAPHLDGHVHVFGFLVISGFVVKRIEGLKTDGASRPYADVRVDCGQLI   |
| XP_016427080 | GSQFFITTKTAPHLDGHVHVFGFLVISGFVIEKKIEGLKTDASRPYADVRVIDCGQLI  |
| XP_016318510 | GSQFFITTKTAPHLDGHVHVFGFLVISGFVIEKKIEGLKTDASRPYADVRVIDCGQLI  |
| XP_015209664 | GSQFFITTKMAPHLDGHVHVFGFLVISGFVIRQIENLKTDAASRPYADVRVIDCGELI  |
| XP_015209662 | GSQFFITTKMAPHLDGHVHVFGFLVISGFVIRQIENLKTDAASRPYADVRVIDCGELI  |
| XP_015209665 | GSQFFITTKMAPHLDGHVHVFGFLVISGFVIRQIENLKTDAASRPYADVRVIDCGELI  |
| XP_005912346 | GSQFFITTKMAPHLDGHVHVFGFLVISGFVIEKKIEGLKTDASRPYADVRVIDCGQLI  |
| XP_005722738 | GSQFFITTKMAPHLDGHVHVFGFLVISGFVIEKKIEGLKTDASRPYADVRVIDCGQLI  |
| XP_020457914 | GSQFFITTKMAPHLDGHVHVFGFLVISGFVIEKKIEGLKTDASRPYADVRVDCGQLI   |
| XP_013132609 | GSQFFITTKMAPHLDGHVHVFGFLVISGFVIEKKIEGLKTDASRPYADVRVDCGQLI   |
| XP_004546791 | GSQFFITTKMAPHLDGHVHVFGFLVISGFVIEKKIEGLKTDASRPYADVRVIDCGQLI  |
| XP_006795195 | GSQFFITTKMAPHLDGHVHVFGFLVISGFVIEKKIEGLKTDASRPYADVRVIDCGQLI  |
| XP_005912345 | GSQFFITTKMAPHLDGHVHVFGFLVISGFVIEKKIEGLKTDASRPYADVRVIDCGQLI  |
| XP_005722737 | GSQFFITTKMAPHLDGHVHVFGFLVISGFVIEKKIEGLKTDASRPYADVRVIDCGQLI  |
| XP_021475699 | GSQFFITTKTAPHLDGHVHVFGFLVISGFVIEKKIEGLKTDGASRPYADVRVDCGQLI  |
| XP_004546790 | GSQFFITTKMAPHLDGHVHVFGFLVISGFVIEKKIEGLKTDASRPYADVRVIDCGQLI  |
| XP_003439241 | GSQFFITTKMAPHLDGHVHVFGFLVISGFVIEKKIEGLKTDASRPYADVRVDCGQLI   |
| XP_006795194 | GSQFFITTKMAPHLDGHVHVFGFLVISGFVIEKKIEGLKTDASRPYADVRVIDCGQLI  |
| XP_023490560 | GSQFFITTKPAPHLDGHVHVFGFLVISGFVIEQIENLKTDAASRPYADVRVIDCGVLA  |

|              |                                                                |
|--------------|----------------------------------------------------------------|
| XP_015209666 | GSQFFITTKMAPHLDG VHVVFGLVISGFEVIRQIENLKTDAASRPYADVRVIDCGELI    |
| XP_005797888 | GSQFFITTKMAPHLDG VHVVFGLVISGFEVIKKIEGLKTDASASRPYADVRVVD CGQLI  |
| CBN81984     | GSQFFITTKMAPHLDG VHVVFGLVISGFEVIKKIEGLKTDASASRPYADVRVMD CGQLI  |
| XP_010559731 | GSQFFI-----VHVVFGLVISGFEVIEQIENLKTDTASRPYADVRVIDCGVLV          |
| XP_007544415 | GSQFFITTKMAPHLDG VHVVFGLVISGFEVIKKIEGLKTDASASRPYADVRVVD CGQLI  |
| XP_014870682 | GSQFFITTKMAPHLDG VHVVFGLVISGFEVIKKIEGLKTDASASRPYADVRVVD CGQLI  |
| XP_011606242 | GSQFFITTKMAPHLDG VHVVFGLVISGFEVVKKIEGLKTDASASRPYADVRVVD CGQLI  |
| CAG04245     | GSQFFITTKMAPHLDG VHVVFGLVISGFEVVKKIEGLKTDASASRPYADVRVVD CGQLI  |
| XP_016887118 | GSQFFITTKMAPHLDG VHVVFGLVISGFEVIKKIEGLKTDASASRPYADVRVMD CGQLI  |
| XP_008306161 | GSQFFITTKMAPHLDG VHVVFGLVISGFEVIKKIEGLKTDASASRPYADVRVMD CGQLI  |
| XP_008394441 | GSQFFITTKMAPHLDG VHVVFGLVISGFEVIKKIEGLKTDASASRPYADVRVVD CGQLI  |
| XP_014825423 | GSQFFITTKMAPHLDG VHVVFGLVISGFEVIKKIEGLKTDASASRPYADVRVVD CGQLI  |
| XP_012398954 | GSQFFITTKPAPHLDG VHVVFGLVISGFEVIEQIENLKTDAASRPYADVRVIDCGVLV    |
| XP_019063096 | GSQFFITTKPAPHLDG VHVVFGLVISGFEVIEQIENLKTDAASRPYADVRVIDCGVLA    |
| XP_009073803 | GSQFFITTKPAPHLDG VHVVFGLVISGFEVIEQIENLKTDTASRPYADVRVIDCGVLV    |
| XP_016400109 | GSQFFITTKTAPHLDG VHVVFGLVISGFEVIKIEGLKTDASASRPYADVRVIDCGQLI    |
| XP_016359192 | GSQFFITTKTAPHLDG VHVVFGLVISGFEVIKKIEGLKTDASASRPYADVRVIDCGQLI   |
| XP_004081327 | GSQFFITTKTAPHLDG VHVVFGLVISGFEI IKKIEGLKTDASASRPYADVRVVD CGQLI |
| XP_020568300 | GSQFFITTKTAPHLDG VHVVFGLVISGFEI IKKIEGLKTDASASRPYADVRVVD CGQLI |
| XP_016041020 | GSQFFITTKPAPHLDG VHVVFGLVISGFEVIEQIENLKTDAASRPYADVRVIDCGVLA    |
| XP_017942181 | GSQFFITTKPAPHLDG VHVVFGLVISGFEVIEQIENLKTDTASRPYADVRVIDCGVLV    |
| XP_017942183 | GSQFFITTKPAPHLDG VHVVFGLVISGFEVIEQIENLKTDTASRPYADVRVIDCGVLV    |
| XP_017942182 | GSQFFITTKPAPHLDG VHVVFGLVISGFEVIEQIENLKTDTASRPYADVRVIDCGVLV    |
| XP_020501265 | GSQFFITTKMAPHLDG VHVVFGLVISGFEVIKKIEGLKADSASRPYADVRVMD CGQLF   |
| KFP01329     | GSQFFITTKPAPHLDG VHVVFGLVISGFEVIEQIENLKTDTASRPYADVRVIDCGVLV    |
| XP_015856948 | GSQFFITTKPAPHLDG VHVVFGLVISGFEVIEQIENLKTDAASRPYADVRVIDCGVLA    |
| XP_020139631 | GSQFFITTKPAPHLDG VHVVFGLVISGFEVIEQIENLKTDAASRPYADVRVIDCGVLA    |
| XP_020139628 | GSQFFITTKPAPHLDG VHVVFGLVISGFEVIEQIENLKTDAASRPYADVRVIDCGVLA    |
| XP_006982975 | GSQFFITTKPAPHLDG VHVVFGLVISGFEVIEQIENLKTDAASRPYADVRVIDCGVLA    |
| XP_015856947 | GSQFFITTKPAPHLDG VHVVFGLVISGFEVIEQIENLKTDAASRPYADVRVIDCGVLA    |
| XP_014427753 | GSQFFITTKPAPHLDG VHVVFGLVISGFEVIEQIENLKTDTASRPYADVRVIDCGVLV    |
| XP_013857648 | GSQFFITTKMAPHLDG VDVVFGLVISGFEVIKKIEGLKTDASASRPYADVRVVD CGQLI  |
| XP_023656013 | GSQFFITTKMAPHLDG VHVVFGLVISGFEVVKKIESLKTDSASRPYADVRVIDCGQLI    |
| XP_023656011 | GSQFFITTKMAPHLDG VHVVFGLVISGFEVVKKIESLKTDSASRPYADVRVIDCGQLI    |
| XP_023656014 | GSQFFITTKMAPHLDG VHVVFGLVISGFEVVKKIESLKTDSASRPYADVRVIDCGQLI    |
| XP_004448689 | GSQFFITTKPAPHLDG VHVVFGLVISGFEVIEQIENLKTDAASRPYADVRVIDCGVLA    |
| XP_004448688 | GSQFFITTKPAPHLDG VHVVFGLVISGFEVIEQIENLKTDAASRPYADVRVIDCGVLA    |
| XP_023476440 | GSQFFITTKPAPHLDG VHVVFGLVISGFEVIEQIENLKTDAASRPYADVRVIDCGVLA    |

\*\*\*\*\*:                   \*.\* \*\* \*:\* \*\*\*\*\*:.\* :
