# Supplementary material for: Compression of Large Sets of Sequence Data Reveals Fine Diversification of Functional Profiles in Multigene Families of Proteins: A Study for Peptidyl-Prolyl cis/trans Isomerases (PPIase)
Source: MDPI journal article supplement (doi:10.3390/biom9020059), 2019-02-11
Supplement: s1 [file s1]

# Arrangement of cyclophilins in the heat-map

|    | PP1A | PP1B | PP1C | PP1F | PP1L3A | PP1L1 | PP1D | PP1W1 | PP1L2 | RANBP | PP1L4 | PP1G | NKTR | PP1E | PP1L4 | CWC27 | PP1L6 |
|----|------|------|------|------|--------|-------|------|-------|-------|-------|-------|------|------|------|-------|-------|-------|
| 1  | V    | V    | V    | G    | -      | -     | S    | E!    | -     | T!    | V     | Q    | D*   | S    | -     | I     | K     |
| 2  | N!   | T!   | T    | N!   | -      | -     | N!   | G!    | -     | N*    | N*    | R*   | R*   | N*   | -     | Q!    | H*    |
| 3  | P!   | V    | A    | P!   | -      | -     | P!   | P!    | -     | P*    | P*    | P    | P*   | P*   | -     | E*    | D     |
| 4  | T    | K!   | K    | L    | -      | -     | R!   | K!    | V!    | V!    | V!    | R!   | Q*   | Q*   | -     | P*    | F     |
| 5  | V!   | V*   | V*   | V!   | -      | -     | V    | R     | K     | V*    | V*    | C    | C*   | V*   | -     | P     | V*    |
| 6  | F!   | Y    | F*   | Y    | -      | -     | F    | V!    | K     | F!    | F*    | F!   | H    | Y*   | -     | T!    | F!    |
| 7  | F    | F*   | F*   | L    | -      | P     | F    | S!    | K!    | F     | F     | F    | F*   | M!   | -     | N     | L!    |
| 8  | D!   | D*   | D*   | D!   | M      | P     | D!   | D!    | G     | D     | D     | D*   | D!   | D*   | -     | G     | D!    |
| 9  | I!   | L    | V!   | V    | S      | N     | V    | S!    | Y*    | V!    | V     | I!   | I!   | I*   | M     | K*    | I!    |
| 10 | A    | R    | R    | D    | V*     | V!    | D    | A*    | V     | C     | S     | A    | E*   | K!   | A     | V*    | C     |
| 11 | V    | I!   | I    | A!   | T*     | Y     | I    | I!    | R!    | A     | I     | I!   | I!   | I    | V     | L!    | I!    |
| 12 | D    | G*   | G    | N    | L      | L     | G    | I!    | L     | D     | G!    | N!   | N*   | G*   | L     | L!    | D     |
| 13 | G    | D    | D!   | G    | H      | E     | G    | H*    | H     | G     | G     | N    | R*   | N!   | L     | K!    | S     |
| 14 | E    | E!   | K    | K    | T*     | T*    | E    | T*    | T*    | E     | Q     | Q    | E*   | K!   | E!    | T*    | S     |
| 15 | P!   | D    | D!   | P    | D!     | S     | R    | S!    | N!    | P     | E     | P!   | P*   | P    | T     | T!    | P     |
| 16 | L!   | V    | V    | L    | V      | M!    | V    | M     | K     | L     | V     | A    | V*   | A!   | T!    | A!    | I     |
| 17 | G!   | G*   | G*   | G!   | G*     | G*    | G*   | G*    | G*    | G*    | G*    | G*   | G*   | G*   | L     | G*    | G*    |
| 18 | R    | R*   | R*   | R!   | -      | I     | R*   | D*    | D     | R     | R     | R*   | R*   | R*   | G     | D     | R!    |
| 19 | V    | V!   | I*   | V    | D!     | I     | I    | I*    | L!    | I     | M     | V!   | I*   | I!   | D!    | I*    | L     |
| 20 | S!   | I!   | V    | V    | I      | V     | V!   | H     | N     | T     | K     | V!   | M!   | Q    | V     | D*    | I     |
| 21 | F!   | F    | I*   | L    | K*     | L     | L    | T     | L     | M!    | I     | F!   | F*   | M    | V     | I!    | F!    |
| 22 | E!   | G*   | G*   | E    | I      | E*    | E*   | K     | E*    | E*    | E*    | E!   | Q*   | L!   | I     | E*    | E     |
| 23 | L*   | L    | L*   | L*   | E*     | L     | L*   | L*    | L*    | L*    | L*    | L*   | L*   | L*   | D     | L*    | L*    |
| 24 | F*   | F    | F*   | K    | V      | Y*    | F!   | F*    | H     | F*    | F     | F*   | F*   | R*   | L     | W*    | Y!    |
| 25 | A    | G*   | G*   | A*   | F      | W     | A    | P     | C     | S!    | A!    | S    | S*   | S!   | Y     | S!    | C     |
| 26 | D    | K    | K!   | D    | C*     | K     | D*   | V!    | D     | N!    | D*    | D*   | D*   | D*   | T     | K     | D     |
| 27 | K!   | T    | V*   | V*   | E!     | H*    | I    | E*    | L     | I*    | V     | V    | I!   | V!   | E     | E*    | V     |
| 28 | V!   | V*   | V*   | V*   | R      | A     | V!   | C*    | T     | V*    | V     | C*   | C*   | V*   | E     | A!    | C     |
| 29 | P*   | P*   | P*   | P*   | T      | P*    | P*   | P*    | P*    | P*    | P*    | P*   | P*   | P*   | R!    | P*    | P*    |
| 30 | K*   | K*   | K!   | K*   | P      | K     | K    | K*    | K     | R     | K!    | K!   | K*   | M!   | P     | K     | K!    |
| 31 | T    | T*   | T*   | T*   | K!     | T*    | T*   | T*    | T!    | T*    | T     | T*   | T*   | T*   | R     | A*    | T*    |
| 32 | A    | V!   | V*   | A*   | T      | C*    | A*   | V*    | C     | A*    | A!    | C    | C!   | A!   | A     | C*    | C!    |
| 33 | E*   | D    | E    | E*   | C!     | K     | E*   | E*    | E     | E*    | E*    | E!   | K*   | E*   | C     | R*    | K     |
| 34 | N*   | N*   | N*   | N*   | E      | N*    | N*   | N*    | N*    | N*    | N*    | N*   | N*   | N*   | L     | N*    | N*    |
| 35 | F*   | F*   | F*   | F*   | M*     | F*    | F*   | F*    | F*    | F*    | F*    | F*   | F*   | F*   | N*    | F*    | F*    |
| 36 | R    | V    | V!   | R*   | E      | A     | R*   | C     | I     | R*    | R*    | R!   | L*   | R*   | F*    | I!    | Q     |
| 37 | A    | A    | A    | A*   | S!     | E     | A    | V*    | R     | A*    | Q     | C!   | C*   | C!   | L*    | Q*    | V     |

|    |    |    |    |    |    |    |    |    |    |    |    |    |    |    |    |    |    |
|----|----|----|----|----|----|----|----|----|----|----|----|----|----|----|----|----|----|
| 38 | L* | L* | L* | L* | R  | L* | L* | H* | L! | L* | F! | L* | L* | L* | K* | L* | L* |
| 39 | S! | A* | A* | C* | C* | A  | C* | S* | C  | C* | C* | C* | C* | C* | L* | C* | C* |
| 40 | T* | T! | T* | T* | V* | R  | T* | R  | K  | T* | T* | T! | S! | T* | C* | L  | T  |
| 41 | G* | G! | G* | G* | P* | R  | G* | N* | K  | G* | G* | G* | G* | H* | K* | E* | G* |
| 42 | E* | E! | E* | E* | Q* | G  | E* | G* | H  | E* | E* | E* | E* | E* | I  | A  | K  |
| 43 | K  | K! | K! | K! | A  | -  | K* | -  | -  | K  | F  | K  | K  | K* | K* | -  | A  |
| 44 | G* | G  | G* | G* | G* | -  | G* | -  | -  | G* | R! | G* | G* | G* | -  | -  | G  |
| 45 | -  | -  | -  | -  | -  | -  | I  | -  | -  | -  | K! | T  | L  | -  | -  | -  | F  |
| 46 | -  | -  | -  | -  | -  | -  | G* | -  | -  | -  | -  | G* | G* | -  | -  | -  | S  |
| 47 | -  | -  | -  | -  | -  | -  | H  | -  | -  | -  | -  | K* | K* | -  | -  | -  | Q  |
| 48 | -  | -  | -  | -  | -  | -  | T  | -  | -  | -  | -  | S  | T! | -  | -  | -  | -  |
| 49 | -  | -  | -  | -  | -  | -  | T  | -  | -  | -  | D  | T* | T* | -  | -  | -  | R  |
| 50 | -  | -  | -  | -  | -  | -  | G* | -  | -  | -  | G  | Q  | G  | -  | -  | -  | G! |
| 51 | -  | -  | -  | -  | -  | -  | K! | -  | -  | -  | V  | K* | K* | -  | -  | -  | I  |
| 52 | -  | -  | -  | -  | V  | -  | P* | -  | -  | -  | P* | P! | K* | -  | -  | -  | R  |
| 53 | F* | F  | Y  | F* | Q  | -  | L* | -  | -  | F* | I  | L* | L* | F! | -  | -  | L* |
| 54 | G  | G* | G* | G* | W! | Y* | H  | Y* | Y* | G* | G* | H! | C* | G* | Y  | Y* | H  |
| 55 | Y* | Y! | Y* | Y* | R* | Y* | F! | Y* | Y* | F! | Y! | Y* | Y* | F! | Y* | Y* | Y* |
| 56 | K* | K! | K  | K* | D  | N  | K* | N* | D  | K! | K* | K* | K* | K! | N* | D  | K  |
| 57 | G  | N  | G* | G* | L! | G  | G* | G  | G  | N! | G! | S  | G* | G* | Y  | N  | N  |
| 58 | S* | S* | S  | S* | G! | T  | C  | H* | T  | S* | S  | C  | S! | S* | C  | T* | S  |
| 59 | C! | K! | K  | T! | S  | K  | P  | T  | I  | I  | T  | L  | T* | S! | L! | I! | I  |
| 60 | F* | F* | F* | F* | L  | F* | I  | F* | F  |
| 61 | H* | H* | H* | H* | Q  | H* | H! | H* | H* |
| 62 | R* | R* | R* | R* | P* | R* | N  | R* | R* |
| 63 | I! | V* | V* | V* | P* | I! | I! | I! | S  | V! | V  | V  | V* | I  | V! | V! | I  |
| 64 | I* | I* | I* | I* | P  | I* | I* | I* | I* | I! | I* | V* | V* | I* | Q! | V  | V* |
| 65 | P* | K  | K* | P* | P  | K  | K  | K* | R! | P! | K* | K* | K* | P* | R  | P! | Q  |
| 66 | G  | D! | D* | S  | G* | D  | K  | G  | N! | D! | D* | D! | N* | Q! | D  | G! | N! |
| 67 | F* | F  | F* | G  |
| 68 | M  | M* | M* | M* | K! | M! | M* | M* | V  | V  | M* | M* | M* | M* | I! | I* | W* |
| 69 | C* | I* | I* | C* | Q! | I  | I! | I* | I! | C* | I! | V! | I* | C* | I  | V! | I  |
| 70 | Q* | Q* | Q* | Q* | V* | Q* |
| 71 | G* | G* | G* | A! | F* | G! | G* | T* | G* | G* | G! | G* | G* | G! | T! | G* | G* |
| 72 | G* | G* | G* | G* | C! | G* |
| 73 | D* | D* | D* | D* | L* | D* |
| 74 | F  | F* | I! | F* | S* | P* | F! | P* | P* | I* | F  | F* | F* | F* | P* | P* | I* |
| 75 | T* | T* | T* | T* | L* | T* | S! | T  | T  | T* | V  | S  | S! | T* | T  | T! | V  |
| 76 | R  | R! | T  | N* | P  | G* | N  | G* | G  | K  | N  | E! | E* | N* | G! | G* | Y  |
| 77 | H  | G* | G  | H* | R  | -  | Q  | -  | -  | H  | G! | G* | G* | H* | -  | -  | G  |

[illegible]

|     |    |    |    |    |    |    |    |    |    |    |    |    |    |    |    |    |    |
|-----|----|----|----|----|----|----|----|----|----|----|----|----|----|----|----|----|----|
| 118 | A* | A  | A! | A* | N! | A  | A! | A  | S  | Q  | S  | R* | R* | S* | N  | A! | K! |
| 119 | G* | G  | G* | G* |
| 120 | P* | K! | P* | P* | P* | P  | R  | S  | P  | Q! | P  | K  | K* | P! | S  | S  | R  |
| 121 | N* | D* | D* | N* | N  | D! | N  | N! | N! | N! | S  | D! | H! | N* | D  | H! | H* |
| 122 | T* | T* | T* | T* | T! | T  | T* | T* | S! | T* | T  | T* | T* | T  | Q  | D* | S! |
| 123 | N* | H  | N* | N* |
| 124 | G  | G* | G* | G* | G! | G* | G* | G* | R  | N  | G* | G* | G* | G* | G  | G  | G! |
| 125 | S* | C* | S* | S* | S* | S* | S* | S* |
| 126 | Q* |
| 127 | F* |
| 128 | F* | V  | F* | F* | F* | F* | L  | F* | Y* |
| 129 | I* | I* | I* | I* | I! | V  | I  | I! | I  | I* | I! | I* | I* | L  | I! | F* | I* |
| 130 | C* | T* | T  | C* | T  | T* | T* | T* | T! | T* | T* | T* | T* | T! | T* | T* | T* |
| 131 | T  | T* | L  | T* | Y* | L* | T* | V* | F! | L* | C* | T* | T* | C  | T  | L  | L  |
| 132 | A  | V! | T! | I  | G  | A! | V! | V  | R! | K* | S  | K  | K* | D! | G  | G! | Q* |
| 133 | K* | K  | K  | K* | K  | P* | P! | P* | S  | K* | K! | P! | P! | K! | E  | R  | A  |
| 134 | -  | -  | -  | -  | -  | -  | -  | -  | -  | -  | -  | -  | -  | -  | N  | -  | -  |
| 135 | T  | T* | P! | T* | Q  | T! | T* | T* | C  | A* | C  | T  | A* | T* | L! | A! | T  |
| 136 | E  | A  | T  | D  | P  | Q  | P! | P* | A  | E* | D  | P* | P* | D  | D  | D! | P! |
| 137 | W  | W* | W* | W* | H! | W  | H* | W* | Y  | H! | W! | H* | H* | W* | Y! | E* | Y! |
| 138 | L* | L! |
| 139 | D* | D* | D* | D* | D  | D* | D* | D* | D! | D* | D* | D* | D* | D* | D  | N! | D* |
| 140 | G* | G* | G* | G  | M  | G! | G  | N* | K  | F  | G  | G  | G* | G  | G  | N  | R  |
| 141 | K* | K! | K! | K! | K  | K* | K* | K* | K* | K* | K* | H  | V* | K* | V  | K* | K! |
| 142 | H  | H* | H* | H* | Y* | H* | H  | F! |
| 143 | V* | V* | V* | V* | T* | T! | V* | T! | T  | V* | V* | V* | V* | V* | T! | T* | V* |
| 144 | V  | V* | V* | V* | V  | I* | V* | V* | I! | V! | V* | V* | V* | V* | V  | I  | A* |
| 145 | F* |
| 146 | G* |
| 147 | K  | K! | K! | H  | K! | R* | Q  | R* | R  | F  | K  | Q  | L* | E  | E! | K* | Q! |
| 148 | V* | V! | V! | V* | V! | V! | V* | V! | V! | V* | I! | V* | V* | V! | V! | V! | L  |
| 149 | K  | L  | I  | K  | I* | C  | I  | T! | V  | K! | I  | I  | I* | T  | T  | T! | I  |
| 150 | -  | -  | -  | -  | -  | -  | -  | -  | -  | -  | -  | -  | -  | -  | -  | G* | -  |
| 151 | E  | E! | D! | E  | D  | Q  | K! | K* | G! | D  | D  | S* | S* | E! | E* | D! | E  |
| 152 | G  | G* | G  | G* | G  | G* | G* | G* | G* | T* | G  |
| 153 | M! | M! | M! | M  | L  | I  | I  | M* | F  | M* | L  | Q! | F* | L  | M  | V  | T  |
| 154 | N! | E! | T! | D  | E! | G  | G! | E* | D  | D  | L* | E  | E* | D* | D! | Y  | E  |
| 155 | I  | V  | V  | V* | T  | M  | V! | V  | V  | T  | V  | V  | V* | V* | I  | N* | V! |
| 156 | V  | V* | V* | V  | L* | V  | A  | V  | L* | V* | M  | V! | I* | L! | I  | M! | L* |
| 157 | E! | R  | H  | K  | D  | N  | R! | Q* | T  | K! | R* | R  | E! | R! | K  | L  | K  |

|     |    |    |    |    |    |    |    |    |    |    |    |    |    |    |    |    |    |
|-----|----|----|----|----|----|----|----|----|----|----|----|----|----|----|----|----|----|
| 158 | A! | K  | S  | K  | E  | R  | I  | R! | A  | K! | K* | E  | Q! | Q  | K  | R! | Q  |
| 159 | M! | V  | I  | I! | L! | V  | L  | I* | M  | I! | I  | I! | I* | I! | I  | L* | L! |
| 160 | E* | E* | E* | E* | E* | G  | E* | S  | E* | E! | E* | E* | E* | E* | N* | S  | E  |
| 161 | R  | S  | L  | S! | K* | M  | N  | N! | N  | S! | N  | N  | N! | A  | E! | E  | L  |
| 162 | F! | T! | Q! | F! | L  | V  | V  | V! | V  | F! | V! | Q! | L* | Q  | T  | V  | V  |
| 163 | G* | K  | A  | G* | P! | E  | E  | K* | E  | G* | P  | K  | K* | G  | F  | D  | P  |
| 164 | S  | T  | T  | S* | V! | T  | V  | V! | S  | S  | T! | T  | T* | S  | V  | I  | T  |
| 165 | -  | D  | D  | -  | N  | N  | -  | N  | D! | -  | G! | D* | D* | -  | D* | D! | -  |
| 166 | R! | S  | G  | K  | E  | S  | K  | P* | P  | P! | P! | A  | A  | K  | K  | D  | Q  |
| 167 | N! | R  | H  | S! | K! | Q  | G  | K* | K  | K  | N! | A  | A* | D  | D  | D  | N  |
| 168 | -  | -  | -  | -  | T  | -  | -  | T* | T  | -  | -  | -  | -  | -  | -  | -  | -  |
| 169 | G  | D* | D* | G* | Y  | D* | E  | D* | D! | G* | N  | S* | S* | G  | F  | E! | E  |
| 170 | K  | K! | R! | R! | R! | R  | K  | K* | R! | S  | K  | K! | R* | K  | V  | R* | R  |
| 171 | T  | P* | P* | T! | P* | P* | P* | P* | P* | V! | P* | P* | P* | P! | P* | P* | P  |
| 172 | S  | L  | L  | S  | L! | V  | A  | Y* | K  | C  | K  | F  | Y* | K  | Y! | H  | I  |
| 173 | K* | K  | T  | K  | N  | D  | K  | E  | E  | R  | L  | A! | A* | Q! | Q! | N  | H  |
| 174 | K  | D! | N! | K! | D  | D  | L  | D* | E  | R! | P* | E! | D* | K  | D  | P  | M  |
| 175 | I  | V  | C  | I  | V  | V! | C  | V! | I! | I! | V* | V  | V* | V! | I  | H! | C! |
| 176 | T  | I  | S  | V  | H  | K  | V  | S! | R  | T  | V* | R! | R* | I  | R* | K! | R  |
| 177 | I  | I  | I  | I  | I! | I  | I  | I* | I  | I* | I! | I! | V* | I! | I* | I* | I! |
| 178 | A  | A  | I  | T! | K  | I  | A  | I* | D  | T! | S  | L  | I! | A  | N  | K  | T  |
| 179 | D  | D! | N! | D  | D  | K  | E  | N  | A  | E  | Q  | S  | D* | D  | H* | S  | D  |
| 180 | C  | C! | S! | C* | I  | A  | -  | I  | T  | C* | C  | C* | C* | C  | T* | C  | S  |
| 181 | G  | G  | G  | G* | T  | Y  | -  | T  | T  | G* | G  | G* | G* | G* | V! | E  | G  |
| 182 | Q! | K  | K  | Q! | I  | P  | -  | V! | V! | Q* | E* | E! | V! | E* | I! | V  | D  |
| 183 | L  | I  | I  | L  | H* | S  | -  | K* | F! | I! | M* | L* | L  | Y  | L* | L* | P  |
| 184 | E  | E  | D  | S  | A* | G  | -  | -  | V! | -  | -  | -  | A  | V  | D! | F  | Y  |
