# Supplementary material for: Compression of Large Sets of Sequence Data Reveals Fine Diversification of Functional Profiles in Multigene Families of Proteins: A Study for Peptidyl-Prolyl cis/trans Isomerases (PPIase)
Source: MDPI journal article supplement (doi:10.3390/biom9020059), 2019-02-11
Supplement: s1 [file s1]

CLUSTAL 2.0.9 multiple sequence alignment of FKBP38s

```

NP_036313      LRKKTLVPG-PPGSSRPVKGQVVTVHLQTSLE-NG--TRVQEEPELVFTLGDGCDVIQALD
NP_001295302   LRKKTLVPG-PPGSSRPVKGQVVTVHLQTSLE-NG--TRVQEEPELVFTLGDGCDVIQALD
XP_003817801   LRKKTLVPG-PPGSSRPVKGQVVTVHLQTSLE-NG--TRVQEEPELVFTLGDGCDVIQALD
XP_010384957   LRKKTLVPG-PPGSSRPVKGQVVTVHLQTSLE-NG--TRVQEEPELVFTLGDGCDVIQALD
XP_003817802   LRKKTLVPG-PPGSSRPVKGQVVTVHLQTSLE-NG--TRVQEEPELVFTLGDGCDVIQALD
XP_011747960   LRKKTLVPG-PPGSSRPVKGQVVTVHLQTSLE-NG--TRVQEEPELVFTLGDGCDVIQALD
XP_003915233   LRKKTLVPG-PPGSSRPVKGQVVTVHLQTSLE-NG--TRVQEEPELVFTLGDGCDVIQALD
EHH59371       LRKKTLVPG-PPGSSRPVKGQVVTVHLQTSLE-NG--TRVQEEPELVFTLGDGCDVIQALD
XP_005588521   LRKKTLVPG-PPGSSRPVKGQVVTVHLQTSLE-NG--TRVQEEPELVFTLGDGCDVIQALD
XP_002828980   LRKKTLVPG-PPGSSRPVKGQVVTVHLQTSLE-NG--TRVQEEPELVFTLGDGCDVIQALD
PNJ28395       LRKKTLVPG-PPGSSRPVKGQVVTVHLQTSLE-NG--TRVQEEPELVFTLGDGCDVIQALD
XP_011949838   LRKKTLVPG-PPGSSRPVKGQVVTVHLQTSLE-NG--TRVQEEPELVFTLGDGCDVIQALD
XP_018870801   LRKKTLVPG-PPGSSRPVKGQVVTVHLQTSLE-NG--TRVQEEPELVFTLGDGCDVIQALD
XP_007993999   LRKKTLVPG-PPGSSRPVKGQVVTVHLQTSLE-NG--TRVQEEPELVFTLGDGCDVIQALD
XP_014978797   LRKKTLVPG-PPGSSRPVKGQVVTVHLQTSLE-NG--TRVQEEPELVFTLGDGCDVIQALD
XP_011747796   LRKKTLVPG-PPGSSRPVKGQVVTVHLQTSLE-NG--TRVQEEPELVFTLGDGCDVIQALD
XP_003915232   LRKKTLVPG-PPGSSRPVKGQVVTVHLQTSLE-NG--TRVQEEPELVFTLGDGCDVIQALD
XP_002828981   LRKKTLVPG-PPGSSRPVKGQVVTVHLQTSLE-NG--TRVQEEPELVFTLGDGCDVIQALD
XP_010328455   LRKKTLVPG-PPGSSRPVKGQVVTVHLQTSLE-NG--TRVQEEPELVFTLGDGCDVIQALD
XP_008969279   LRKKTLVPG-PPGSSRPVKGQVVTVHLQTSLE-NG--TRVQEEPELVFTLGDGCDVIQALD
XP_011845848   LRKKTLVPG-PPGSSRPVKGQVVTVHLQTSLE-NG--TRVQEEPELVFTLGDGCDVIQALD
XP_024207707   LRKKTLVPG-PPGSSRPVKGQVVTVHLQTSLE-NG--TRVQEEPELVFTLGDGCDVIQALD
XP_011526166   LRKKTLVPG-PPGSSRPVKGQVVTVHLQTSLE-NG--TRVQEEPELVFTLGDGCDVIQALD
XP_011949835   LRKKTLVPG-PPGSSRPVKGQVVTVHLQTSLE-NG--TRVQEEPELVFTLGDGCDVIQALD
XP_017356796   LRKKTLVPG-PPGSSRPVKGQVVTVHLQTSLE-NG--TRVQEEPELVFTLGDGCDVIQALD
XP_008969278   LRKKTLVPG-PPGSSRPVKGQVVTVHLQTSLE-NG--TRVQEEPELVFTLGDGCDVIQALD
NP_001247999   LRKKTLVPG-PPGSSRPVKGQVVTVHLQTSLE-NG--TRVQEEPELVFTLGDGCDVIQALD
XP_024307207   LRKKTLVPG-PPGSSRPVKGQVVTVHLQTSLE-NG--TRVQEEPELVFTLGDGCDVIQALD
XP_016791013   LRKKTLVPG-PPGSSRPVKGQVVTVHLQTSLE-NG--TRVQEEPELVFTLGDGCDVIQALD
XP_009192156   LRKKTLVPG-PPGSSRPVKGQVVTVHLQTSLE-NG--TRVQEEPELVFTLGDGCDVIQALD
XP_024307210   LRKKTLVPG-PPGSSRPVKGQVVTVHLQTSLE-NG--TRVQEEPELVFTLGDGCDVIQALD
XP_005588520   LRKKTLVPG-PPGSSRPVKGQVVTVHLQTSLE-NG--TRVQEEPELVFTLGDGCDVIQALD
XP_011747874   LRKKTLVPG-PPGSSRPVKGQVVTVHLQTSLE-NG--TRVQEEPELVFTLGDGCDVIQALD
XP_024092631   LRKKTLVPG-PPGSSRPVKGQVVTVHLQTSLE-NG--TRVQEEPELVFTLGDGCDVIQALD
XP_004060362   LRKKTLVPG-PPGSSRPVKGQVVTVHLQTSLE-NG--TRVQEEPELVFTLGDGCDVIQALD
XP_011949836   LRKKTLVPG-PPGSSRPVKGQVVTVHLQTSLE-NG--TRVQEEPELVFTLGDGCDVIQALD
XP_007993998   LRKKTLVPG-PPGSSRPVKGQVVTVHLQTSLE-NG--TRVQEEPELVFTLGDGCDVIQALD
XP_014978796   LRKKTLVPG-PPGSSRPVKGQVVTVHLQTSLE-NG--TRVQEEPELVFTLGDGCDVIQALD
XP_009251263   LRKKTLVPG-PPGSSRPVKGQVVTVHLQTSLE-NG--TRVQEEPELVFTLGDGCDVIQALD
XP_011747747   LRKKTLVPG-PPGSSRPVKGQVVTVHLQTSLE-NG--TRVQEEPELVFTLGDGCDVIQALD
XP_017822960   LRKKTLVPG-PPGSSHPVKGQVVTVHLQTSLE-NG--TRVQEEPELVFTLGDGCDVIQALD
XP_009192157   LRKKTLVPG-PPGSSRPVKGQVVTVHLQTSLE-NG--TRVQEEPELVFTLGDGCDVIQALD
XP_010328454   LRKKTLVPG-PPGSSRPVKGQVVTVHLQTSLE-NG--TRVQEEPELVFTLGDGCDVIQALD
XP_011845855   LRKKTLVPG-PPGSSRPVKGQVVTVHLQTSLE-NG--TRVQEEPELVFTLGDGCDVIQALD
XP_012299012   LRKKTLVPG-PPGSSRPVQGQVVTVHLQTSLE-NG--TRVQEEPELVFTLGDGCDVIQALD
XP_011949833   LRKKTLVPG-PPGSSRPVKGQVVTVHLQTSLE-NG--TRVQEEPELVFTLGDGCDVIQALD
XP_017356795   LRKKTLVPG-PPGSSRPVKGQVVTVHLQTSLE-NG--TRVQEEPELVFTLGDGCDVIQALD
XP_014401247   LRKKTLVPG-PPGSSRPVKGQVVTVQLQTSLE-NG--TRVQEEPELVFTLGDGCDVIQALD
EPQ12447       LRKKTLVPG-PPGSSRPVKGQVVTVQLQTSLE-NG--TRVQEEPELVFTLGDGCDVIQALD
XP_008154612   LRKKTLVPG-PPGSSRPVKGQVVTVQLQTSLE-NG--TRVQEEPELVFTLGDGCDVIQALD
XP_016066232   LRKKTLVPG-PPGSSRPVKGQVVTVQLQTSLE-NG--TRVQEEPELVFTLGDGCDVIQALD
XP_012584673   LRKKTLVPG-PPGSSRPVKGQVVTVQLQTSLE-NG--TRVQEEPELVFTLGDGCDVIQALD
XP_015413209   LRKKTLVPG-PPGSSRPVKGQVVTVQLQTSLE-NG--TRVQEEPELVFTLGDGCDVIQALD
XP_022262557   LRKKTLVPG-PPGSSRPVKGQVVTVQLQTSLE-NG--TRVQEEPELVFTLGDGCDVIQALD
XP_023103313   LRKKTLVPG-PPGSSRPVKGQVVTVQLQTSLE-NG--TRVQEEPELVFTLGDGCDVIQALD

```

|              |                                                                |
|--------------|----------------------------------------------------------------|
| XP_019271925 | LRKKTLVPG-PPGSSRPAGQVVTVQLQTSLE-NG--TRVQEEPELVFTLGDGCDVIQALD   |
| XP_007088417 | LRKKTLVPG-PPGSSRPAGQVVTVQLQTSLE-NG--TRVQEEPELVFTLGDGCDVIQALD   |
| XP_002761955 | LRKKTLVPG-PPGSSHPVKQVVTVHLQTSLE-NG--TRVQEEPELVFTLGDGCDVIQALD   |
| XP_014921066 | LRKKTLVPG-PPGSSRPAGQVVTVQLQTSLE-NG--TRVQEEPELVFTLGDGCDVIQALD   |
| XP_005972346 | LRKKTLVPG-PPGSSRPATKGQVVTVRLQTSLE-NG--TRVQEEPELVFTLGDGCDVIQALD |
| XP_006058025 | LRKKTLVPG-PPGSSRPATKGQVVTVRLQTSLE-NG--TRVQEEPELVFTLGDGCDVIQALD |
| XP_017905457 | LRKKTLVPG-PPGSSRPATKGQVVTVRLQTSLE-NG--TRVQEEPELVFTLGDGCDVIQALD |
| XP_019271923 | LRKKTLVPG-PPGSSRPAGQVVTVQLQTSLE-NG--TRVQEEPELVFTLGDGCDVIQALD   |
| XP_008542456 | LRKKTLVPG-PPGSSRPATKGQVVTVQLQTSLE-NG--TRVQEEPELVFTLGDGCDVIQALD |
| XP_006186302 | LRKKTLVPG-PPGSSRPAGQVVTVQLQTSLE-NG--TRVQEEPELVFTLGDGCDVIQALD   |
| XP_006199114 | LRKKTLVPG-PPGSSRPAGQVVTVQLQTSLE-NG--TRVQEEPELVFTLGDGCDVIQALD   |
| XP_010970466 | LRKKTLVPG-PPGSSRPAGQVVTVQLQTSLE-NG--TRVQEEPELVFTLGDGCDVIQALD   |
| XP_024416679 | LRKKTLVPG-PPGSSRPATKGQVVTVQLQMSLE-NG--TRVQEEPELVFTLGDGCDVIQALD |
| XP_005652984 | LRKKTLVPG-PPGSSRPATKGQVVTVQLQTSLE-NG--TRVQEEPELVFTLGDGCDVIQALD |
| XP_014687059 | LRKKTLVPG-PPGSSRPATKGQVVTVQLQTSLE-NG--TRVQEEPELVFTLGDGCDVIQALD |
| XP_015344756 | LRKKTLVPG-PPGSSRPAGQVVTVQLQMSLE-NG--TRVQEEPELVFTLGDGCDVIQALD   |
| XP_012299010 | LRKKTLVPG-PPGSSRPVQGVVTVHLQTSLE-NG--TRVQEEPELVFTLGDGCDVIQALD   |
| XP_019819388 | LRKKTLVPG-PPGSSRPATKGQVVTVRLQTSLE-NG--TRVQEEPELVFTLGDGCDVIQALD |
| ELW67147     | LRKKTLVPG-PPGSSRPAGQVVTVQLQTSLE-NG--TRVQEDPELVFTLGDGCDVIQALD   |
| XP_005873908 | LRKKTLVPG-PPGSSRPATKGQVVTVQLQTSLE-NG--TRVQEEPELVFTLGDGCDVIQALD |
| XP_016066229 | LRKKTLVPG-PPGSSRPAGQVVTVQLQTSLE-NG--TRVQEEPELVFTLGDGCDVIQALD   |
| XP_008154611 | LRKKTLVPG-PPGSSRPAGQVVTVQLQTSLE-NG--TRVQEEPELVFTLGDGCDVIQALD   |
| XP_020740155 | LRKKTLVPG-PPGSSRPATKGQVVTVQLQTSLE-NG--TRVQEEPELVFTLGDGCDVIQALD |
| XP_003982130 | LRKKTLVPG-PPGSSRPAGQVVTVQLQTSLE-NG--TRVQEEPELVFTLGDGCDVIQALD   |
| XP_019271924 | LRKKTLVPG-PPGSSRPAGQVVTVQLQTSLE-NG--TRVQEEPELVFTLGDGCDVIQALD   |
| XP_007088416 | LRKKTLVPG-PPGSSRPAGQVVTVQLQTSLE-NG--TRVQEEPELVFTLGDGCDVIQALD   |
| XP_541935    | LRKKTLVPG-PPGSSRPAGQVVTVQLQTSLE-NG--TRVQEEPELVFTLGDGCDVIQALD   |
| XP_012419293 | LRKKTLVPG-PPGSSRPAGQVVTVQLQTSLE-NG--TRVQEEPELVFTLGDGCDVIQALD   |
| XP_004688664 | LRKKTLVPG-PPGSSRPAGQVVTVQLQTSLE-NG--TRVQEEPELVFTLGDGCDVIQALD   |
| XP_015413208 | LRKKTLVPG-PPGSSRPAGQVVTVQLQTSLE-NG--TRVQEEPELVFTLGDGCDVIQALD   |
| XP_006747423 | LRKKTLVPG-PPGSSRPAGQVVTVQLQTSLE-NG--TRVQEEPELVFTLGDGCDVIQALD   |
| XP_017905455 | LRKKTLVPG-PPGSSRPATKGQVVTVRLQTSLE-NG--TRVQEEPELVFTLGDGCDVIQALD |
| XP_010993437 | LRKKTLVPG-PPGSSRPAGQVVTVQLQTSLE-NG--TRVQEEPELVFTLGDGCDVIQALD   |
| XP_006058026 | LRKKTLVPG-PPGSSRPATKGQVVTVRLQTSLE-NG--TRVQEEPELVFTLGDGCDVIQALD |
| XP_014921065 | LRKKTLVPG-PPGSSRPAGQVVTVQLQTSLE-NG--TRVQEEPELVFTLGDGCDVIQALD   |
| XP_006058024 | LRKKTLVPG-PPGSSRPATKGQVVTVRLQTSLE-NG--TRVQEEPELVFTLGDGCDVIQALD |
| XP_001503379 | LRKKTLVPG-PPGSSRPATKGQVVTVQLQTSLE-NG--TRVQEEPELVFTLGDGCDVIQALD |
| XP_005972345 | LRKKTLVPG-PPGSSRPATKGQVVTVRLQTSLE-NG--TRVQEEPELVFTLGDGCDVIQALD |
| XP_019271926 | LRKKTLVPG-PPGSSRPAGQVVTVQLQTSLE-NG--TRVQEEPELVFTLGDGCDVIQALD   |
| XP_006186301 | LRKKTLVPG-PPGSSRPAGQVVTVQLQTSLE-NG--TRVQEEPELVFTLGDGCDVIQALD   |
| XP_006199113 | LRKKTLVPG-PPGSSRPAGQVVTVQLQTSLE-NG--TRVQEEPELVFTLGDGCDVIQALD   |
| XP_010970465 | LRKKTLVPG-PPGSSRPAGQVVTVQLQTSLE-NG--TRVQEEPELVFTLGDGCDVIQALD   |
| XP_003123564 | LRKKTLVPG-PPGSSRPATKGQVVTVQLQTSLE-NG--TRVQEEPELVFTLGDGCDVIQALD |
| XP_024416678 | LRKKTLVPG-PPGSSRPATKGQVVTVQLQMSLE-NG--TRVQEEPELVFTLGDGCDVIQALD |
| NP_001192650 | LRKKTLVPG-PPGSSRPATKGQVVTVRLQTSLE-NG--TRVQEEPELVFTLGDGCDVIQALD |
| XP_020740157 | LRKKTLVPG-PPGSSRPATKGQVVTVQLQTSLE-NG--TRVQEEPELVFTLGDGCDVIQALD |
| XP_015344757 | LRKKTLVPG-PPGSSRPAGQVVTVQLQMSLE-NG--TRVQEEPELVFTLGDGCDVIQALD   |
| XP_006147177 | LRKKTLVPG-PPGSSRPAGQVVTVQLQTSLE-NG--TRVQEDPELVFTLGDGCDVIQALD   |
| XP_020740156 | LRKKTLVPG-PPGSSRPATKGQVVTVQLQTSLE-NG--TRVQEEPELVFTLGDGCDVIQALD |
| XP_014687058 | LRKKTLVPG-PPGSSRPATKGQVVTVQLQTSLE-NG--TRVQEEPELVFTLGDGCDVIQALD |
| XP_004404706 | LRKKTLVPG-PPGSSRPAGQVVTVQLQTSLE-NG--TRVQEEPELVFTLGDGCDVIQALD   |
| XP_019819387 | LRKKTLVPG-PPGSSRPATKGQVVTVRLQTSLE-NG--TRVQEEPELVFTLGDGCDVIQALD |
| XP_020008573 | LRKKTLVPG-PPGSSRPAGQVVTVRLQMSLE-NG--TRVQEEPELVFTLGDGCDVIQALD   |
| XP_007116995 | LRKKMLVPG-PPGSSRPAGQVVTVQLQTSLE-NG--TRVQEEPELVFTLGDGCDVIQALD   |
| XP_024622992 | LRKKMLVPG-PPGSSRPAGQVVTVQLQTSLE-NG--TRVQEEPELVFTLGDGCDVIQALD   |
| XP_012391225 | LRKKMLVPG-PPGSSRPAGQVVTVQLQTSLE-NG--TRVQEEPELVFTLGDGCDVIQALD   |
| XP_020740154 | LRKKTLVPG-PPGSSRPATKGQVVTVQLQTSLE-NG--TRVQEEPELVFTLGDGCDVIQALD |
| XP_022414296 | LRKKMLVPG-PPGSSRPAGQVVTVQLQTSLE-NG--TRVQEEPELVFTLGDGCDVIQALD   |

XP\_021587090 LRKKTLVPG-PPGSSRPAGQVVTVQLQMSLE-NG--TRVQEEPELVFTLGD CDVIQALD  
XP\_019592316 LRKKTLVPG-PPGSSRP TKGQVVTVQLQTSLE-NG--TRVQEEPELVFTLGD CDVIQALD  
XP\_023989754 LRKKMLVPG-PPGSSRPAGQVVTVQLQTSLE-NG--TRVQEEPELVFTLGD CDVIQALD  
XP\_024622991 LRKKMLVPG-PPGSSRPAGQVVTVQLQTSLE-NG--TRVQEEPELVFTLGD CDVIQALD  
XP\_004277581 LRKKMLVPG-PPGSSRPAGQVVTVQLQTSLE-NG--TRVQEEPELVFTLGD CDVIQALD  
XP\_017651479 LRKKTLVPG-PPGSSRPLKGQVVTVHLQMSLE-SG--TRVQEEPELSFTLGD CDVIQALD  
XP\_022414295 LRKKMLVPG-PPGSSRPAGQVVTVQLQTSLE-NG--TRVQEEPELVFTLGD CDVIQALD  
XP\_017651477 LRKKTLVPG-PPGSSRPLKGQVVTVHLQMSLE-SG--TRVQEEPELSFTLGD CDVIQALD  
XP\_007461122 LRKKMLVPG-PPGSSRPAGQVVTVQLQTSLE-NG--TRVQEEPELVFTLGD CDVIQALD  
XP\_007195521 LRKKMLVPG-PPGSSRPAGQVVTVQLQTSLE-NG--TRVQEEPELVFTLGD CDVIQALD  
XP\_019592317 LRKKTLVPG-PPGSSRP TKGQVVTVQLQTSLE-NG--TRVQEEPELVFTLGD CDVIQALD  
XP\_005001666 LRKKTLVPG-PPGSSRP TKGQVVTVQLQMSLE-NG--TRVQEEPELTFTLGD CDVIQALD  
XP\_008822765 LRKKTLVPG-PPGSSRPLKGQVVTVHLQMSLE-SG--TRVQEEPELSFTLGD CDVIQALD  
XP\_017651474 LRKKTLVPG-PPGSSRPLKGQVVTVHLQMSLE-SG--TRVQEEPELSFTLGD CDVIQALD  
XP\_013002970 LRKKTLVPG-PPGSSRP TKGQVVTVQLQMSLE-NG--TRVQEEPELTFTLGD CDVIQALD  
XP\_012924198 LRKKTLMPG-LPGSGRPTKGQVVTVQLQMSLE-NG--TRVQEEPELAFTLGD CDVIQALD  
EHB02679 LRKKTLIPG-PPGSGRPTKGQVVTVQLQMSLE-NG--TRVQEEPELAFTLGD CDVIQALD  
XP\_012924197 LRKKTLMPG-LPGSGRPTKGQVVTVQLQMSLE-NG--TRVQEEPELAFTLGD CDVIQALD  
XP\_021535026 LRKKTLVPG-PPGSSRPAGQVVTVQLQTSLE-NG--TRVQEEPELVFTLGD CDVIQALD  
XP\_007943554 LRKKTLVPG-PPGSSRPAGQVVTVWLQTSLE-NG--TKVQEEPELVFTLGD CDVIQALD  
XP\_011220551 LRKKTLVPG-PPGSSRPAGQVVTVQLQTSLE-NG--TRVQEEPELVFTLGD CDVIQALD  
XP\_008588853 LRKKTLVPG-PPGSSRPAGQVVTVQLQMSLE-NG--TRVQEEPELVFTLGD CDVIQALD  
XP\_012916132 LRKKTLVPG-PPGSSRPAGQVVTVQLQTSLE-NG--TRVQEEPELVFTLGD CDVIQALD  
XP\_022353384 LRKKTLVPG-PPGSSRPAGQVVTVQLQTSLE-NG--TRVQEEPELVFTLGD CDVIQALD  
XP\_008048663 LRKKTLVPG-PPGSSHPAGQVVTVHLQTSLE-NG--TRVQEEPELVFTLGD CDVIQALD  
XP\_019652974 LRKKTLVPG-PPGSSRPAGQVVTVQLQTSLE-NG--TRVQEEPELVFTLGD CDVIQALD  
XP\_008702161 LRKKTLVPG-PPGSSHPAGQVVTVQLQTSLE-NG--TRVQEEPELVFTLGD CDVIQALD  
XP\_019497623 LRKKTLVPG-PPGSSRPAGQVVTVQLQTSLE-NG--TRVQEEPELVFTLGD CDVIQALD  
XP\_007943555 LRKKTLVPG-PPGSSRPAGQVVTVWLQTSLE-NG--TKVQEEPELVFTLGD CDVIQALD  
XP\_002912777 LRKKTLVPG-PPGSSRPAGQVVTVQLQTSLE-NG--TRVQEEPELVFTLGD CDVIQALD  
EFB19124 LRKKTLVPG-PPGSSRPAGQVVTVQLQTSLE-NG--TRVQEEPELVFTLGD CDVIQALD  
XP\_013362739 LRKKTLVPG-PPGSSRP TKGQVVTVQLQMSLE-NG--TRVQEEPELAFTLGD CDVIQALD  
XP\_006876371 LRKKTLVPG-PPGSSRPAGQVVTVQLQTSLE-NG--TRVQEEPELVFTLGD CDVIQALD  
XP\_021493693 LRKKTLVPG-PPGSSRPLKGQVVKVHLQMSLE-NG--TRVQEEPELAFTLGD CDVIQALD  
XP\_022353383 LRKKTLVPG-PPGSSRPAGQVVTVQLQTSLE-NG--TRVQEEPELVFTLGD CDVIQALD  
NP\_001272500 LRKKTLVPG-PPGSSRP TKGQVVTVRLQTSLE-NG--TRVQEEPELVFTLGD CDVIQALD  
XP\_012916133 LRKKTLVPG-PPGSSRPAGQVVTVQLQTSLE-NG--TRVQEEPELVFTLGD CDVIQALD  
XP\_011365085 LRKKTLVPG-PPGSSRPAGQVVTVQLQTSLE-NG--TRVQEEPELVFTLGD CDVIQALD  
XP\_006885938 LRKKTLVPG-PPGSSRPVKGQVVTVWLQTSLE-NG--TRVQEEPELMFTLGD CDVIQALD  
XP\_004423006 LRKKTLVPG-PPGSSRP TKGQVVTVQLQTSLE-NG--TRVQEEPELVFTLGD CDVIQALD  
XP\_012413338 LRKKTLVPG-PPGSSRPAGQVVTVRLQTSLE-NG--TRVQEEPELVFTLGD CDVIQALD  
XP\_010591524 VRKKTLVPG-PPGSSRPAGQVVTVRVQTSLE-NG--TRVQEEPELVFTLGD CDVIQALD  
XP\_008048662 LRKKTLVPG-PPGSSHPAGQVVTVHLQTSLE-NG--TRVQEEPELVFTLGD CDVIQALD  
XP\_015987916 LRKKTLVPG-PPGSSRP TKGQVVTVQLQTSLE-NG--TRVQEEPELVFTLGD CDVIQALD  
XP\_004666075 LRKKTLVPG-PLGSGRPLKGQVVTVHLQMSLE-NG--TRVQEEPELVFTLGD CDVIQALD  
XP\_019497624 LRKKTLVPG-PPGSSRPAGQVVTVQLQTSLE-NG--TRVQEEPELVFTLGD CDVIQALD  
XP\_004649071 LRKKTLVPG-PPGCNRPTKGQVVTVQLQMSLE-NG--TRVQEEPELSFTLGD CDVIQALD  
APD32922 LRKKTLVPG-PPGSGRPAGQVVTVRLQMALE-NG--TRVQEEPELAFTLGD CDVIQALD  
XP\_013362738 LRKKTLVPG-PPGSGRPTKGQVVTVQLQMSLE-NG--TRVQEEPELAFTLGD CDVIQALD  
XP\_012509480 LRKKTLVPG-PPGSSHPTRGQVVTVQLQTSLE-NG--TRVQEEPELVFTLGD CDVIQALD  
NP\_034353 LRMKTLVPG-PKGSSRPLKGQVVTVHLQMSLE-NG--TRVQEEPELAFTLGD CDVIQALD  
XP\_021074830 LRMKTLVPG-PKGSSRPLKGQVVTVHLQMSLE-NG--TRVQEEPELAFTLGD CDVIQALD  
XP\_006876370 LRKKTLVPG-PPGSSRPAGQVVTVQLQTSLE-NG--TRVQEEPELVFTLGD CDVIQALD  
XP\_021493691 LRKKTLVPG-PPGSSRPLKGQVVKVHLQMSLE-NG--TRVQEEPELAFTLGD CDVIQALD  
XP\_006904374 LRKKTLVPG-PPGSSRPAGQVVTVQLQTSLE-NG--TRVQEEPELVFTLGD CDVIQALD  
XP\_006989222 LRKKTLVPG-PPGSGRPLKGQVVTVHLHVSLE-NG--TRVQEEPELAFTLGD CDVIQALD  
XP\_004423005 LRKKTLVPG-PPGSSRP TKGQVVTVQLQTSLE-NG--TRVQEEPELVFTLGD CDVIQALD  
XP\_006885939 LRKKTLVPG-PPGSSRPVKGQVVTVWLQTSLE-NG--TRVQEEPELMFTLGD CDVIQALD

|              |                                                              |
|--------------|--------------------------------------------------------------|
| XP_004666073 | LRKKTLVPG-PLGSGRPLKGQVTVHLQMSLE-NG--TRVQEEPELVFTLGD CDVIQALD |
| ELK19193     | LRKKTLVPG-PPGSSRPAGQVTVQLQTSLE-NG--TRVQEEPEVFTLGD CDVIQALD   |
| XP_003499206 | LRKKTLVPG-PPGSTRPLKGQVTVHLQMSLE-NG--TRVQEEPELAFTLGD CDVIQALD |
| XP_014637207 | LRKKTLVPG-PPGSSRPTKGQVTVQLQTSLE-NG--TRVQEEPELVFTLGD CDVIQALD |
| XP_012790031 | LRKKTLIPG-PPGSSRPTKGQVTVRLQTALE-NG--TRVQDEPELQFTLGD CDVIQALD |
| XP_003413066 | VRKKTLVPG-PPGSSRPAGQVTVRVQTSLE-NG--TRVQEEPELVFTLGD CDVIQALD  |
| XP_004384434 | LRKKTLVPG-PPGSSRPAGQVTVRLQTSLE-NG--TRVQEEPELVFTLGD CDVIQALD  |
| XP_015987917 | LRKKTLVPG-PPGSSRPTKGQVTVQLQTSLE-NG--TRVQEEPEVFTLGD CDVIQALD  |
| XP_021078721 | LRKKTLVPG-PPGSSRPLKGQVTVYLQMSLE-NG--TRVQEEPELAFTLGD CDVIQALD |
| 5MGX_E       | LRKKTLVPG-PPGSSRPVKQVTVHLQTSLE-NG--TRVQEEPELVFTLGD CDVIQALD  |
| XP_017168055 | LRMKTLVPG-PKGSSRPLKGQVTVHLQMSLE-NG--TRVQEEPELAFTLGD CDVIQALD |
| NP_001032257 | LRKKTLVPG-PTGSSRPLKGQVTVHLQMSLE-NG--TRVQEEPELAFTLGD CDVIQALD |
| XP_004595597 | LRKKTLVPG-PPGSSRPSKGQVTVHLHTSLE-NG--TRVQEDPELVFTLGD CDVIQALD |
| XP_017529992 | LRKKTLVPG-LPGSSLPAGQVTVQLQTSLE-NG--TRVQEESELVFTLGD CDVIQALD  |
| XP_005370624 | LRKKTLVPG-PPGSSRPLKGQVTVHLQMSLE-NG--THVQEEPELFTLGD CDVIQALD  |
| NP_001104536 | LRMKTLVPG-PKGSSRPLKGQVTVHLQMSLE-NG--TRVQEEPELAFTLGD CDVIQALD |
| XP_021074828 | LRMKTLVPG-PKGSSRPLKGQVTVHLQMSLE-NG--TRVQEEPELAFTLGD CDVIQALD |
| XP_012664880 | LRKKTLVPG-PPGSSRPTKGQVTVQLQTSLE-NG--TRVQDEPELMFTLGD CDVIQALD |
| XP_006989221 | LRKKTLVPG-PPGSGRPLKGQVTVHLHVSLE-NG--TRVQEEPELAFTLGD CDVIQALD |
| XP_007635977 | LRKKTLVPG-PPGSTRPLKGQVTVHLQMSLE-NG--TRVQEEPELAFTLGD CDVIQALD |
| XP_004616706 | LRKKTLIPG-PPGSSRPTKGQVTVRLQTALE-NG--TRVQDEPELQFTLGD CDVIQALD |
| XP_012664879 | LRKKTLVPG-PPGSSRPTKGQVTVQLQTSLE-NG--TRVQDEPELMFTLGD CDVIQALD |
| XP_004705311 | LRKKTLVPG-PPGSSRPAGQVTVRLQTSLE-NG--TRVQEEPELVFTLGD CDVIQALD  |
| XP_017168054 | LRMKTLVPG-PKGSSRPLKGQVTVHLQMSLE-NG--TRVQEEPELAFTLGD CDVIQALD |
| XP_021026690 | LRMKTLVPG-PKGSSRPLKGQVTVHLQMSLE-NG--TRVQEEPELAFTLGD CDVIQALD |
| XP_004595596 | LRKKTLVPG-PPGSSRPSKGQVTVHLHTSLE-NG--TRVQEDPELVFTLGD CDVIQALD |
| XP_017529990 | LRKKTLVPG-LPGSSLPAGQVTVQLQTSLE-NG--TRVQEESELVFTLGD CDVIQALD  |
| XP_005370622 | LRKKTLVPG-PPGSSRPLKGQVTVHLQMSLE-NG--THVQEEPELFTLGD CDVIQALD  |
| XP_012883833 | LRKKTLVPG-PPGAGRPTKGQVTVRLQMSLE-DG--ARVQEEPELLFTLGD CDVIQALD |
| XP_021026691 | LRMKTLVPG-PKGSSRPLKGQVTVHLQMSLE-NG--TRVQEEPELAFTLGD CDVIQALD |
| XP_010849455 | LRKKTLVPG-PPGSSRPTKGQVTVRLQTSLE-NG--TRVQEEPELVFTLGD CDVIQALD |
| XP_010604777 | LRKKTLVPG-PPGSSRPTKGQVTVQLQMSLE-NG--TRVQEEPELSFTLGD CDVIQALD |
| XP_004705310 | LRKKTLVPG-PPGSSRPAGQVTVRLQTSLE-NG--TRVQEEPELVFTLGD CDVIQALD  |
| XP_021026689 | LRMKTLVPG-PKGSSRPLKGQVTVHLQMSLE-NG--TRVQEEPELAFTLGD CDVIQALD |
| XP_005898381 | LRKKTLVPG-PPGSSRPTKGQVTVRLQTSLE-NG--TRVQEEPELVFTLGD CDVIQALD |
| XP_012883832 | LRKKTLVPG-PPGAGRPTKGQVTVRLQMSLE-DG--ARVQEEPELLFTLGD CDVIQALD |
| XP_024622994 | LRKKMLVPG-PPGSSRPAGQVTVQLQTSLE-NG--TR-----ALD                |
| XP_022414294 | LRKKMLVPG-PPGSSRPAGQVTVQLQTSLE-NG--TR-----ALD                |
| XP_007116996 | LRKKMLVPG-PPGSSRPAGQVTVQLQTSLE-NG--TR-----ALD                |
| XP_024622993 | LRKKMLVPG-PPGSSRPAGQVTVQLQTSLE-NG--TR-----ALD                |
| XP_022414293 | LRKKMLVPG-PPGSSRPAGQVTVQLQTSLE-NG--TR-----ALD                |
| XP_023055022 | LRKKTLVPG-PPGSSRPVKQVTVHLQTSLE-NG--TRVQEEPELVFTLGD CDVIQALD  |
| ELR54589     | LRKKTLVPG-PPGSSRPTKGQVTVRLQTSLE-NG--TRVQEEPELVFTLGD CDVIQALD |
| XP_010845609 | LRKKTLVPG-PPGSSRPTKGQVTVRLQ-----FTLGD CDVIQALD               |
| XP_021538869 | LRKKTLVPG-PPGSSRPAGQVTVQLQTSLE-NG--TRVQEEPELVFTLGD CDVIQALD  |
| KF022602     | LRKKTLVPG-PPGSSRPTKGQVTVQLQMSLE-NG--TRVQEEPELSFTLGD CDVIQALD |
| 2MF9_A       | LRKKTLVPG-PPGSSRPVKQVTVHLQTSLE-NG--TRVQEEPELVFTLGD CDVIQALD  |
| PN150452     | LRKKTLVPG-PPGSSRPVKQVTVHLQTSLE-NG--TRVQEEPELVFTLGD CDVIQALD  |
| PNJ28404     | LRKKTLVPG-PPGSSRPVKQVTVHLQTSLE-NG--TRVQEEPELVFTLGD CDVIQALD  |
| XP_007533227 | LRKKTLIPG-PPGARPVQGVTVRLQVSLE-SG--ARVLDEPELQVFTLGD CDVIQALD  |
| XP_020864537 | LRKKILAAA-PPGAERPQKQDVTVQLKVSLEDHG--TQVEEHPRLTFTLGD CDFLQALD |
| XP_012397649 | LRKKIVVAA-PPGAERPQKQDMTVQLKVSLEDDG--TQVEEESLFTFTLGD CDFLQALD |
| XP_001369403 | LKKKILVAA-PPGAERPQKQDVTVHLKISLEEDG--TQVEEQPSITFTLGD CDFLQALD |
| 2F2D_A       | LRKKTLVPG-PPGSSRPVKQVTVHLQTSLE-NG--TRVQEEPELVFTLGD CDVIQALD  |
| 2D9F_A       | LRKKTLVPG-PPGSSRPVKQVTVHLQTSLE-NG--TRVQEEPELVFTLGD CDVIQALD  |
| XP_015668943 | LKKKVIVSG-QGQESRPVKQDVTVHFKATLEDG---TVVEEDPRLTFTLGD CDIIQALD |
| 2AWG_A       | LRKKTLVPG-PPGSSRPVKQVTVHLQTSLE-NG--TRVQEEPELVFTLGD CDVIQALD  |
| XP_015668942 | LKKKVIVSG-QGQESRPVKQDVTVHFKATLEDG---TVVEEDPRLTFTLGD CDIIQALD |

|              |                                                                 |
|--------------|-----------------------------------------------------------------|
| XP_025032464 | LKKKVIIISG-QGQESRPVKGDVTVIRLKVMLEDG---TVVEEDPSLTFTLGD CDVIQALD  |
| XP_007443923 | LKKKVIIISG-QGQESRPVKGDVTVIRLKVMLEDG---TVVEEDPSLTFTLGD CDVIQALD  |
| KFV73372     | LKKKTLVPG-QGVESRPRKGDVTVRLKATLEDG---SVVEENPSLTFTLGD CDVQLALD    |
| AXB56359     | LKKKTLVPG-QGVESRPRKQEVTVRLRATLEDG---NVVEENPSLTFTLGD CDVQLALD    |
| XP_009675861 | LKKKTLVPG-QGVESRPRKGDVTVRLKATLEDG---SVVEENPSLTFTLGD CDVQLALD    |
| AXB73131     | LKKKTLVPG-QGVESRPHKQEVTVRLRATLEDG---NVVEENPSLTFTLGD CDVQLALD    |
| XP_010723402 | LKKKTLVPG-QGVESRPRKGDVTVRLRATLEDG---SVVEENPSLTFTLGD CDVQLALD    |
| KFV67807     | LKKKTLVPG-QGVDTRPRKGDVTVIRLEARLEDG---SVVEEDPALTFTLGD CDVQLALD   |
| XP_010304001 | LKKKTLVPG-QGVDTRPRKGDVTVRLKATLEDG---SVVEENPALTFTLGD CDVQLALD    |
| NP_001241668 | LKKKTLVPG-QGVESRPRKQEVTVRLRATLEDG---NVVEENPSLTFTLGD CDVQLALD    |
| KF003599     | LKKKTLVPG-QGVDTRPRKGDVTVRLKATLEDG---SVVEENPALTFTLGD CDVQLALD    |
| XP_021234495 | LKKKTLMPG-QGVESRPRKQEVTVRLRATLEDG---SVVEENPRLTFTLGD CDVQLALD    |
| POI29828     | LKKKTLVPG-QGVESRPRKQEVTVRLRATLEDG---NVVEENPSLTFTLGD CDVQLALD    |
| XP_021234496 | LKKKTLMPG-QGVESRPRKQEVTVRLRATLEDG---SVVEENPRLTFTLGD CDVQLALD    |
| XP_023963943 | LKKKTLVPG-QGMASRPRKGDVTVRLKAMLEDG---SVVEDSPSLSTFTLGD CDVQMALD   |
| XP_014793985 | LKKKTLVPG-QGVDTRPRKGDVTVIRLKATLEDG---SVVEENPALTFTLGD CDVQLALD   |
| XP_009899401 | LKKKTLVPG-QGVDTRPRKGDVTVIRLEARLEDG---SVVEEDPALTFTLGD CDVQLALD   |
| XP_015742210 | LKKKTLVPG-QGVESRPHKQEVTVRLRATLDDG---TVVEENPSLTFTLGD CDVQLALD    |
| XP_009641057 | LKKKTLVPG-QGVDTRPHKGDVTVRLKATLEDG---SVVEENPALTFTLGD CDVQLALD    |
| KFP19261     | LKKKTLVPG-QGVDTRPHKGDVTVRLKATLEDG---SVVEENPALTFTLGD CDVQLALD    |
| XP_024065593 | LKKKTLVPG-QGVASRPRKGDVTVRLKAMLEDG---SVVEDSPSLSTFTLGD CDVQMALD   |
| XP_011594878 | LKKKTLVPG-QGVDTRPRKGDVTVRLKATLEDG---SVVEENPALTFTLGD CDVQLALD    |
| XP_014742726 | LKKKTLVPG-QGVDSRPQKGDVTVIRLKATLEDG---TVVEEDPALTFTLGD CDVQMALD   |
| XP_015742208 | LKKKTLVPG-QGVESRPHKQEVTVRLRATLDDG---TVVEENPSLTFTLGD CDVQLALD    |
| XP_019369180 | LKKKTLVPG-QGVESRPRKQNVTVRLRVMLEDG---SVVEENPGLTFTLGD CDVQLALD    |
| XP_010561556 | LKKKTLVPG-QGVDTRPRKGDVTVRLKATLEDG---SVVEENPALTFTLGD CDVQLALD    |
| XP_008638175 | LKKKTLVPG-QGADSRPQKGDVTVIRLKATLEDG---TVVEENPALTFTLGD CDVQLALD   |
| XP_002195923 | LKKKTLVPG-QGVDSRPQKGDVTVIRLKATLEDG---TVVEEDPALTFTLGD CDVQLALD   |
| XP_015266773 | LKKKVLVAG-QGRETRPVKNQDVTIRLKTTLLEDG---TVVEENPSLTFTLGD CDVIQALD  |
| XP_005505599 | LKKKTLVPG-QGVDTRPNKQNVTVIRLKATLEDG---SVVEENPALTFTLGD CDVQLALD   |
| XP_014115778 | LKKKTLVPG-QGVDSRPQKGDVTVIRLKATLEDG---TVVEENPALTFTLGD CDVQLALD   |
| XP_014742725 | LKKKTLVPG-QGVDSRPQKGDVTVIRLKATLEDG---TVVEEDPALTFTLGD CDVQMALD   |
| XP_018780521 | LKKKTLVPG-QGVESRPQKGDVTVIRLKATLEDG---TVVEEDPALTFTLGD CDVQLALD   |
| XP_005235043 | LKKKTLVPG-QGVDTRPHKGDVTVRLRAALEDG---TVVEENPALTFTLGD CDVQLALD    |
| OPJ86694     | LKKKTLVPG-QGVDSRPQKQNVTVIRLKATLEDG---SVVEENPALTFTLGD CDVQLALD   |
| XP_019341692 | LKKKTLVPG-RGMESRPSKQVTVRLRVMLEDG---SVVEEDPGLTFTLGD CDVQLALD     |
| XP_021400798 | LKKKTLVPG-QGADSRPQKGDVTVIRLKATLEDG---TVVEEDPALTFTLGD CDVQLALD   |
| XP_006028906 | LKKKTLVPG-QGAESRPRKGDVTVRLRVMLEDG---SVVEEDPGLTFTLGD CDVQLALD    |
| KFQ97904     | LKKKTLVPG-QGVDTRPRKGDVTVRLKATLEDG---SVVEENPALTFTLGD CDVQLALD    |
| XP_015507158 | LKKKTLVAG-QGVDSRPQKGDVTVIRLKATLEDG---TVVEENPALTFTLGD CDVQLALD   |
| KFW12711     | LKKKTLVPG-QGVDTRPRKGDVTVRLKATLEDG---SVVEENPALTFTLGD CDVQLALD    |
| XP_006271082 | LKKKTLVPG-RGMESRPSKQVTVRLRVMLEDG---SVVEEDPGLTFTLGD CDVQLALD     |
| KF081655     | LKKKTLVSG-QGVDTRPRKGDVTVIRLKAMLEDG---SVVEENPALTFTLGD CDVQLALD   |
| XP_007072098 | LKKKTLVPG-QGVESRPRKGDVTVRLKVMLEDG---SVVEDNPSLSFTLGD CDVQMALD    |
| XP_020669929 | LKKKVLVAG-QGRETRPVRGQDVTVRLKATLEDG---SVVEEASTLTFTLGD CDIIHALD   |
| XP_009464539 | LKKKTLVPG-QGVDTRPRKGDVTVRLKATLEDG---SVVEENPALTFTLGD CDVQLALD    |
| XP_010158039 | LKKKTLVPG-QGVDTRPRKGDVTVRLKATLEDG---SVVEENPALTFTLGD CDVQLALD    |
| XP_019149030 | LKKKTLVPG-QGADSRPQKGDVTVIRLKATLEDG---TVVEENPALTFTLGD CDVQLALD   |
| XP_020669930 | LKKKVLVAG-QGRETRPVRGQDVTVRLKATLEDG---SVVEEASTLTFTLGD CDIIHALD   |
| XP_019393900 | LKKKTLVPG-QGVESRPRKQNVTVRLRMMLEDG---SVVEENPGLTFTLGD CDVQLALD    |
| EMP24085     | LKKKTLVPG-QGVESRPRKGDVTVRLKVMLEDG---SVVEDNPSLSFTLGD CDVQMALD    |
| XP_009566597 | LKKKTLVSG-QGVDTRPRKGDVTVIRLKAMLEDG---SVVEENPALTFTLGD CDVQLALD   |
| KFW65305     | LKKKTLVPG-QGVDPRPRKQEVTVRLKATLEDG---SVVEENPALTFTLGD CDVQLALD    |
| XP_015507157 | LKKKTLVAG-QGVDSRPQKGDVTVIRLKATLEDG---TVVEENPALTFTLGD CDVQLALD   |
| XP_013799130 | LKKKTLVPG-RGVESRPHKGDVTVRLKAMLEDS---SVVEENPSLTFTLGD CDVQLALD    |
| XP_014433658 | LRKKTLVPG-HGVESRPRKGDVTVRLKVMLEDG---HVVEENPSLSFTVGD CDVQMALD    |
| XP_009319696 | LKKKTLVPG-QGVDPRPRKQEVTVRLKATLEDG---SVVEENPALTFTLGD CDVQLALD    |
| KFQ36923     | LKKKTLVPG-QGVDTRPHKQNVTVIRLKATLEDGGG---SVVEENPALTFTLGD CDVQLALD |

|              |                                                                 |
|--------------|-----------------------------------------------------------------|
| XP_005060257 | LKKKTLVAG-QGVDSRPQKGQDVTIRLKATLEDG---TVVEEDPALFTFTLGDCDVLQALD   |
| KFU87694     | LKKKTLVPG-RGVDTRPRKGQDVTIRLKATLQDG---RVVEENPALFTFTLGDCDVLQALD   |
| XP_005139681 | LKKKTLVPG-RGGDTRPRKGQDVTIRLKAALQDG---RVVEENPALFTFTLGDCDVLQALD   |
| XP_009993397 | LKKKTLVPG-RGVDTRPRKGQDVTIRLKATLQDG---RVVEENPALFTFTLGDCDVLQALD   |
| AAH84415     | LKKKVLISG-KGAESRPRKGQDVTVQLKSMLNE---NVVEDQESLTFTLGDCDVLQALD     |
| KQL50954     | LKKKTLVPG-RGADTRPRKGQDVTIRLKAALQDG---SVVEESPALFTFTLGDCDVLQALD   |
| NP_001088346 | LKKKVLISG-KGAESRPRKGQDVTVQLKSMLNE---NVVEDQESLTFTLGDCDVLQALD     |
| XP_013913386 | LKKKVLPG-QGQETRPFRGQDVTIRFKAMLEDG---TVVEENPALFTFTLGDCDVLQALD    |
| KFQ13009     | LKKKTLVPG-QGVDTTRPRKGQDVTIRLKATLEDG---SVVEENPALFTFTLGDCDVLQALD  |
| KFQ75436     | VKQKTLVPG-QGVDTTRPRKGQDVTIRLKATLEDG---SVVEENPALFTFTLGDCDVLQALD  |
| KFP56346     | LKKKTLVPG-QGVDTTRPRKGQDVTIRLKASLEDG---SVVEENPALFTFTLGDCDVLQALD  |
| KFM07869     | LKKKTLVPG-QGVDTTRPRKGQDVTIRLKATLEDG---SVVEENPALFTFTLGDCDVLQALD  |
| XP_018096952 | LKKKVLISG-KGAESRPRKGQDVTIRLKSMLNE---NVVEDQESLTFTLGDCDVLQALD     |
| KFP65829     | LKKKTLGPG-QGGDTRPCKGQDVTIRLKATLEDG---SVVEENPALFTFTLGDCDVLQALD   |
| XP_023803625 | LKKKTLVPG-QGVDSRPQKGQDVTIRLKATLEDG---TVVEEDPALFTFTLGDCDVLQALD   |
| XP_009951725 | LKKKTLVPG-QGVDTTRPRKGQDVTIRLKATLEDG---SVVEENPALFTFTLGDCDVLQALD  |
| NP_001120570 | LKKKILISG-KGADSRPRKGQDVTIRLKSMLNE---NVVEEQETLFTFTLGDCDVLQALD    |
| KFP23912     | LKKKTLVPG-QGVDTTRPRKGQDVTIRLKATLEDG---SVVEENPALFTFTLGDCDVLQALD  |
| XP_010073720 | LKKKTVVPG-QGVDTTRPCKGQDVTIRLKATLEDG---SVVEENPALFTFTLGDCDVLQALD  |
| KGL86304     | LQKKTLPVPG-QGVDTTRPRKGQDVTIRLKATLEDG---SVVEENPALFTFTLGDCDVLQALD |
| KFV08597     | LKKKTVVPG-QGVDTTRPCKGQDVTIRLKATLEDG---SVVEENPALFTFTLGDCDVLQALD  |
| KFW76752     | LKKKTLVPG-QGVDTTRPRKGQDVTIRLKATLEDG---TVVEEDPALFTFTLGDCDVLQALD  |
| XP_009700019 | LKKKTLGPG-QGGDTRPCKGQDVTIRLKATLEDG---SVVEENPALFTFTLGDCDVLQALD   |
| XP_010208130 | LKKKTLVPG-QGVDTTRPRKGQDVTIRLKATLEDG---SVVEENPALFTFTLGDCDVLQALD  |
| KFQ81502     | LKKKTLVPG-QGVDTCPKKGQDVTIRLKAMLEDG---SVVEENPALFTFTLGDCDVLQALD   |
| XP_017938939 | LKKKTLVPG-QGVDTTRPRKGQDVTIRLKATLEDG---TVVEEDPALFTFTLGDCDVLQALD  |
| KFP70760     | LKKKTLVPG-QGVDTTRPCKGQDVTIRLKATLEDG---TVVEEDPALFTFTLGDCDVLQALD  |
| XP_009880959 | LQKKTLPVPG-QGVDTTRPRKGQDVTIRLKATLEDG---SVVEENPALFTFTLGDCDVLQALD |
| XP_010292010 | LKKKTLVPG-QGVDTCPKKGQDVTIRLKAMLEDG---SVVEENPALFTFTLGDCDVLQALD   |
| XP_009076312 | LKKKTLVPG-QGVDTTRPCKGQDVTIRLKATLEDG---TVVEEDPALFTFTLGDCDVLQALD  |
| XP_018412986 | LRKKVLEPG-QGVESRPRKGQDVTIRLKTSLTADG---SVVEEHVNYAFTLGDCDVLQALD   |
| XP_022525503 | LRKKVLEPG-SEPDSRPRKGQDVTIRLKTSLTADG---TVVEESNISFTLGDCDVLQALD    |
| XP_021459512 | LRKKVLRAG-NGPDSRPTKGQNVVIHLKTSLADG---TLIEEQPELSFTLGDCDVLQALD    |
| XP_021459510 | LRKKVLRAG-NGPDSRPTKGQNVVIHLKTSLADG---TLIEEQPELSFTLGDCDVLQALD    |
| XP_024277334 | LRKKVLRAG-NGPDSRPTKGQNVVIHLKTSLADG---TLIEEQPELSFTLGDCDVLQALD    |
| XP_024277330 | LRKKVLRAG-NGPDSRPTKGQNVVIHLKTSLADG---TLIEEQPELSFTLGDCDVLQALD    |
| XP_024277333 | LRKKVLRAG-NGPDSRPTKGQNVVIHLKTSLADG---TLIEEQPELSFTLGDCDVLQALD    |
| XP_009512288 | -----SRPRKGQDVTIRLKAMLEDG---SVVEENPALFTFTLGDCDVLQALD            |
| XP_020354512 | LRKKVLRAG-NGPDSRPTKGQNVVIHLKTSLADG---TLIEEQPELSFTLGDCDVLQALD    |
| KFZ50883     | -----VDTRPRKGQDVTIRLKATLEDG---RVVEENPALFTFTLGDCDVLQALD          |
| KFW81721     | -----DSRPRKGQDVTIRLKAMLEDG---SVVEENPALFTFTLGDCDVLQALD           |
| CDQ57258     | LRKKVLRAG-NGPDSRPTKGQNVVIHLKTSLADG---TLIEEQPELSFTLGDCDVLQALD    |
| XP_020354513 | LRKKVLRAG-NGPDSRPTKGQNVVIHLKTSLADG---TLIEEQPELSFTLGDCDVLQALD    |
| XP_020487811 | LKKKVLEDG-EGRDSRPQKGQNVRIHLKTSLTADG---KLVEEQHDLSTFTLGDCDVLQALD  |
| XP_024277331 | LRKKVLRAG-NGPDSRPTKGQNVVIHLKTSLADG---TLIEEQPELSFTLGDCDVLQALD    |
| XP_014071869 | LRKKVLRAG-NGPDSRPTKGQNVVIHLKTSLADG---TLIEEQPELSFTLGDCDVLQALD    |
| XP_011472153 | LKKKVTPAG-KGRASRPQKGQNVRIHLKASLIDG---TLVEEQPNFSFTLGDCDVLQALD    |
| XP_014071870 | LRKKVLRAG-NGPDSRPTKGQNVVIHLKTSLADG---TLIEEQPELSFTLGDCDVLQALD    |
| XP_024114895 | LKKKVTPAG-KGRASRPVKGQNVRIHLKTSLMDG---TVVEEQPDFSFTLGDCDVLQALD    |
| XP_024114896 | LKKKVTPAG-KGRASRPVKGQNVRIHLKTSLMDG---TVVEEQPDFSFTLGDCDVLQALD    |
| ETE64390     | -----RKESRPVKGQDVTIRFKATLEDG---TVVEEDPALFTFTLGDCDVLQALD         |
| XP_023809890 | LKKKVTPAG-KGRASRPQKGQNVRIHLKASLIDG---TLVEEQPNFSFTLGDCDVLQALD    |
| XP_008499209 | -----M-AGVDTRPRKGQDVTIRLKTSLADG---RVGEEETLFTFTLGDCDVLQALD       |
| KFP06384     | -----G-QGVDTTRPRKGQDVTIRLKTSLADG---RVGEEETLFTFTLGDCDVLQALD      |
| XP_023859426 | LRKKVLRAG-NGPDSRPTKGQNVVIHLKTSLADG---TLVEEQPELSFTLGDCDVLQALD    |
| XP_023859424 | LRKKVLRAG-NGPDSRPTKGQNVVIHLKTSLADG---TLVEEQPELSFTLGDCDVLQALD    |
| XP_023859423 | LRKKVLRAG-NGPDSRPTKGQNVVIHLKTSLADG---TLVEEQPELSFTLGDCDVLQALD    |
| XP_021454666 | LKKKVLPVPG-NGPDSRPTKGQNVMIHLKTSLADG---TLIEEQPELSFTLGDCDVLQALD   |

|              |                                                               |
|--------------|---------------------------------------------------------------|
| XP_017572299 | LRKKVLEVG-SGPDSRPQRGQTVTINLKTTLTDG---TTVEEESNISFTLGDGDVIQALD  |
| CDQ97962     | LKKKVLQVG-NGPDSRPQKGQNVMIHLKTSADG---TLIEEQPELSFTLGDGDVIQALD   |
| XP_023854736 | LKKKVLQAG-NGPDSRPQKGQNVVIHLKTSADG---TLIEEQPELSFTLGDGDVIQALD   |
| XP_018920592 | LRKKVVEAG-AGPDSRPQKGQNVTIHLKTSLTNG---AVVEELPNLSFTLGDGDVQLALD  |
| NP_001133417 | LKKKVLQAG-NGPDSRPQKGQNVVIHLKTSADG---TLIEEQPELSFTLGDGDVIQALD   |
| XP_023854735 | LKKKVLQAG-NGPDSRPQKGQNVVIHLKTSADG---TLIEEQPELSFTLGDGDVIQALD   |
| XP_024258320 | LKKKVLQAG-HGPDSRPQKGQNVKIHLKTSADG---TLIEEQPELSFTLGDGDVIQALD   |
| AAI52651     | LRKKVLEAG-AGPDSRPQKGQNVTIHLKTALTNG---TVVDELKDLSTLGDGDVQLALD   |
| XP_020348060 | LKKKVLQAG-NGPDSRPQKGQNVKIHLKTSADG---TLIEEQPELSFTLGDGDVIQALD   |
| NP_957178    | LRKKVLEAG-AGPDSRPQKGQNVTIHLKTALTNG---TVVDELKDLSTLGDGDVQLALD   |
| XP_005932512 | LKKKVLKEG-EGRDSRPQKGQNVKIRLKTSLVDG---TLVEEKPDLAFTLGDGDVIQALD  |
| XP_013860095 | LKKKALEAG-RGRDSRPLKGQSVKINLKTHLMDG---TLIEEQHGLSFTLGDGDVIQALD  |
| PWA20923     | LKKKVLPEG-KGRASRPQKGQDVEINLKTQLMDG---TLVEEQNNLSFTLGDGDVIQALD  |
| XP_005727139 | LKKKVLKEG-EGRDSRPQKGQNVKIRLKTSLVDG---TLVEEKPDLTFTLGDGDVIQALD  |
| XP_006790401 | LKKKVLKEG-EGRDSRPQKGQNVKIRLKTSLVDG---TLVEEKPDLSFTLGDGDVIQALD  |
| XP_019207270 | LKKKVLKEG-EGRDSRPQKGQNVKIRLKTSLVDG---TVVEEKPDLAFTLGDGDVIQALD  |
| XP_024654530 | LKKKVLKEG-EGRDSRPQKGQNVKIRLKTSLVDG---TLVEEKPDFAFTLGDGDVIQALD  |
| XP_007897075 | LKKKVLVAG-RGELYQPQKGQNVTIHLKTSLEDG---TVLQEEPGLSFTLGDGDVIQALD  |
| XP_010870009 | LKKKVLQSG-NGPDTRPTKGQNVIIHLRTTLADG---TFIEEQPNFSFTLGDGDVIQGLD  |
| XP_022615368 | LKKKVLEAG-DGRDSRPQKGQNVKIHLKTYLKDG---ALVEEQSDLTFTLGDGDVIHALD  |
| XP_010870008 | LKKKVLQSG-NGPDTRPTKGQNVIIHLRTTLADG---TFIEEQPNFSFTLGDGDVIQGLD  |
| XP_005795669 | LKKKVLPEG-KGRASRPQKGQDVEINLKTLLMDG---TLVEEQNNLSFTLGDGDVIQALD  |
| XP_020391166 | LKKKVLVAG-QSQEPRPQKGQNVTVRLKMTLEDG---TEVEEDPNLCFTVGDGDVIQALD  |
| AWP11099     | LKKKVLVAG-QGRDSRPQKGQNVKTNLRTYLDKG---TLVEEQTGVTFTLGDSDVIQALD  |
| XP_017333233 | LRKKVLEAG-SGPDSKPQRGQNVTIHLKTTLSDG---TTVEE-SKISFTLGDGDVIQALD  |
| KTF74275     | LRKKIVEAG-AGPDSRPQRGQIVTIDLKTTLTDG---TVVEELPNLSFTLGDGDVQLVLD  |
| XP_017262938 | LKKKALEAG-QGRDSRPLKGQNVKINLKTHLVDG---TLVEEQQDLSFTMGDGDVIQALD  |
| XP_023263872 | LKKKVLEAG-DGRDSRPQKGQNVKIHLKTYLKDR---ALVEEQSDLTFTLGDGDVIHALD  |
| XP_020391165 | LKKKVLVAG-QSQEPRPQKGQNVTVRLKMTLEDG---TEVEEDPNLCFTVGDGDVIQALD  |
| XP_016327233 | LRKKVVEAG-AGPDSRPQRGQNVTIHLKTSLTNG---TVVEELPNLSFTLGDGDVQLALD  |
| XP_016138463 | LRKKVVEAG-AGPDSRPQRGQNVTIHLKTSLTNG---TVVEELPNLSFTLGDGDVQLALD  |
| XP_016356127 | LRKKVVEAG-AGLDSRPQRGQNVTIHLKTTLTDG---TVVEELPNVSFTLGDGDVQLVLD  |
| XP_007577281 | LKKKVLPEG-KGRASRPQKGQDVEINLRTHLMDG---TLVEEQNNLSFTLGDGDVIQALD  |
| XP_008405333 | LKKKVLPEG-KGRASRPQKGQDVEINLRTHLMDG---TLVEEQNNLSFTLGDGDVIQALD  |
| XP_012715520 | LKKKVLEAG-KGRGSRPQKGQNVKINLKTHLMDG---ALVEEQHCLSFTLGDGDVQLALD  |
| XP_012695070 | LRKKVLEGG-EGLDTRPTRGQNVQIKLKTLLFDG---TIVEEDSELAFTLGDGDVIQALD  |
| XP_020795782 | LKKKVLVPG-KGRDSRPQKGQNVKINLKTTLISDG---TVVVEISDLSFTLGDGDVIQALD |
| XP_016382508 | LRKKVVEAG-AGPDSRPQRGQNVTIHLKTTLTDG---TVVEELPNVSFTLGDGDVQLVLD  |
| XP_018522913 | LKKKVLEAG-QGRDSRPQKGQNVKIHLKTYLKDG---KLVEEQSDLAFTLGDGDVIQALD  |
| XP_008305299 | LKKKVLEEG-QGRDSRPQKGQNVVINLKTCLKDG---TPVDEQTGLTFTLGDGDVIQAVD  |
| XP_015238114 | LKKKVVEAG-KGRDSRPQKGQNVIEINLKTQLMDG---TLVDEQHNLSTLGDGDVIQALD  |
| XP_018583793 | LKKKVLEAG-KGPDSKPTKGQNVKIYKASLADG---AVVEEPCLSFTVGDGDVIQALD    |
| XP_016886204 | LKKKVLEEG-QGRDSRPQKGQNVVINLKTCLKDG---TPVDEQTGLTFTLGDGDVIQAVD  |
| XP_019752339 | LKKKVLVAG-EGRESRPKKGQNVITICLKAFLKDG---TLVEEQPELTFTLGDGDVIQALD |
| XP_010728467 | LKKKVLEAG-AGRDSRPQKGQNVKINLKTLYLDG---TPAAEEPNIISFTLGDGDVIQALD |
| KKF19855     | LKKKVLEAG-AGRDSRPQKGQNVKINLKTLYLDG---TPAAEEPNIISFTLGDGDVIQALD |
| XP_015827013 | LKKKVLEAG-KGRDSRPHKGQVVKIHLKTHLMDG---TLAQELCDLAFTLGDGDVIQALD  |
| XP_022061518 | LKKKVLEAG-QGRDSRPQKGQNVKINLKTLYMDG---TLVAEQPDLSFTLGDGDVQLALD  |
| XP_019936960 | LKKKVLEAG-EGRDSRPQKGQNVKINLKTSLKDG---TLVEEQSDVAFTLGDGDVQFQALD |
| XP_003974097 | LKKKVLEVG-EGRDSRPQKGQNVKIDLKTYTKDG---DLVAEEPELCFTLGNGDVIQAVD  |
| XP_023699813 | LKKKVLEAG-NGPDSKPQKGQNVKIFLKMSLSDG---TVVEEPCLSFTLGDGDVIQALD   |
| XP_023699812 | LKKKVLEAG-NGPDSKPQKGQNVKIFLKMSLSDG---TVVEEPCLSFTLGDGDVIQALD   |
| XP_020478047 | LKKKVVKAG-KGRDTRPQKGQNVKIHLKTYLKDG---TLVEEQSDLSFTLGDGDVIQALD  |
| XP_015220721 | LRKKVLAAG-RGPDSRPQKGQTVRVRLKASLQDG---SLVQEEPSLDFTLGDGDVIQALD  |
| XP_023123034 | LKKKVLEAG-EGQDSRPQKGQNVKINLKTLYMDG---TLVEEQPDLSFTLGDGDVQFQALD |
| XP_020478046 | LKKKVVKAG-KGRDTRPQKGQNVKIHLKTYLKDG---TLVEEQSDLSFTLGDGDVIQALD  |
| XP_020478045 | LKKKVVKAG-KGRDTRPQKGQNVKIHLKTYLKDG---TLVEEQSDLSFTLGDGDVIQALD  |
| XP_008275730 | LKIKALEAG-EGRDSRPQKGQNVKINLKTLYMDG---TLVVEEQPDLSFTVGDGDVIQALD |

|              |                                                                                                                       |
|--------------|-----------------------------------------------------------------------------------------------------------------------|
| XP_010770232 | LKKKVLEEG-KGRDSRPQKGQNVKINLKTCLSDG---TLVEKQSDLSFTLGDGDVIAQALD                                                         |
| XP_002601637 | LKKKVIVKG-GDESTRPRPGQDVTIWSRGRLEDG---TTVDQHDEITFGLQEGDVIQAWD                                                          |
| XP_019619553 | LKKKVIVKG-GDESTRPRPGQEVTIWSRGRLEDG---TTVDQHDEITFGLQEGDVIQAWD                                                          |
| XP_006814126 | LKKKVLPKG-GGYRSRPARGDFVTVKYKTYLEND---NEVEDCESLKFILGDGDVIAAFD                                                          |
| XP_006629043 | LRKRVLPKG-QEQAASPSWGQEVTVKLQGVLEDG---TVVEKDPRLTFVIGEGDVIQALE                                                          |
| PVD20167     | LKKKVLNQG-REN-SRPTQGS�TVKVQSFLENG---ICFQD-NTETFILGDGDTLSAID                                                           |
| XP_023841292 | LRKKVLAPG-PQKAEHPAWGQEVTVKMQGVLEDR---SVVEKDRKLVFVIGEGDVIQALE                                                          |
| XP_008410571 | LRKKILESG-DEQVPRSTWGQEVTVKMQGVLEDR---TVVEKDCKLVFVIGEGDVIQALE                                                          |
| XP_008410568 | LRKKILESG-DEQVPRSTWGQEVTVKMQGVLEDR---TVVEKDCKLVFVIGEGDVIQALE                                                          |
| XP_022329628 | LKRKILSKA-PKNAKRPISSDVVTIKVEGKLEDG---TKVDVFESLTFVLGDGDVIAQAWD                                                         |
| XP_014897626 | LRKKILESG-DEQVPRSTWGQEVTVKMQGVLEDR---TVVEKDCKLVFVIGEGDVIQALE                                                          |
| XP_014848641 | LRKKILESG-DEQVPRSTWGQEVTVKMQGVLEDR---TVVEKDCKLVFVIGEGDVIQALE                                                          |
| XP_014848639 | LRKKILESG-DEQVPRSTWGQEVTVKMQGVLEDR---TVVEKDCKLVFVIGEGDVIQALE                                                          |
| XP_007566466 | LRKKILESG-DEQVPRSTWGQEVTVKMQGVLEDR---TVVEKDCKLVFVIGEGDVIQALE                                                          |
| XP_023180976 | LRKKILESG-DEQVPRSTWGQEVTVKMQGVLEDR---TVVEKDCKLVFVIGEGDVIQALE                                                          |
| KMQ91381     | LKKRVIRKG--ENGTRPNRGDICTLNTIGKLE-DS--KVVEEYENLVIQLGDMEVIOGLD                                                          |
| XP_007566465 | LRKKILESG-DEQVPRSTWGQEVTVKMQGVLEDR---TVVEKDCKLVFVIGEGDVIQALE                                                          |
| XP_014897625 | LRKKILESG-DEQVPRSTWGQEVTVKMQGVLEDR---TVVEKDCKLVFVIGEGDVIQALE                                                          |
| XP_015254615 | LRKKVLEPG-DIQVPHSTWGQEVTVKMQGVLEDR---TVVEKDCKLVFVIGEGDVIQALE                                                          |
| XP_005798327 | LRKKILESG-DEQVPRSTWGQEVTVKMQGVLEDR---TVVEKDCKLVFVIGEGDVIQALE                                                          |
| XP_015254612 | LRKKVLEPG-DIQVPHSTWGQEVTVKMQGVLEDR---TVVEKDCKLVFVIGEGDVIQALE                                                          |
| XP_013980328 | LRKKVLAPG-PQKAEHPAWGQEVTVKMQGVLEDR---SVVEKDPKLVFVIGEGDVIQALE                                                          |
| XP_009061784 | LTKKVLVQG-NGRESRPDRGDIVTLDIEGHLSDG---TAVDKYTAFTFPLGEGDVIQALD                                                          |
| XP_022106769 | LMKKILREG-QGAASRPQRGEMVTLKSKGLLEDG---TEVDCHEAISFVLGEGDVVSAWD                                                          |
| XP_020625955 | LKKRVLRQG-KGQDTRPDKGQRVTIQVAGRTEDG---TGVDWNSSLEFILGEGEVIQAFD                                                          |
| XP_020625956 | LKKRVLRQG-KGQDTRPDKGQRVTIQVAGRTEDG---TGVDWNSSLEFILGEGEVIQAFD                                                          |
| XP_010732628 | LRKKVLESS-APNALSPTWGQEVSVKMQCVLEDR---TVVEKDCKLVFVIGEGDVIQALE                                                          |
| XP_015728921 | LRKRVVRDG-TG-G-APEPGQEVSVKVLGALQDG---AVVERDPRLSFVPQGQDVIQALE                                                          |
| XP_003440659 | LRKKVLEPG-TPQGPHPAWDQEVTVKMQCVLEDR---TVVEKDRKLVFVIGEGDVIQALE                                                          |
| XP_014004032 | LRKKVLVPG-PQKAEHPAWGQEVTVKMQGVLEDR---TVVEKDPKLVFVIGEGDVIQALE                                                          |
| XP_010899928 | LRKKVLEPG-PQKAEHPAWGQEVTVKMQGLLEDG---TVVEKDPKLVFVIGEGDVIQALE                                                          |
| XP_020336380 | LRKKVLVPG-PQQAEPHSAWGQEVTVKMQGVLEDR---TVVEKDCKLVFVIGEGDVIQALE                                                         |
| XP_022330049 | LKRKILSKA-PKNAKRPISSDVVTIKVEGNLEDG---TKVDVFESLTFVLGDGDVIAQAWD                                                         |
| PIK48936     | LQKKILTPG-KGHTTRPKADQIVTLRTKGWLEDG---TEIDWNDSITICLGDGDAVQAWD                                                          |
| XP_020336379 | LRKKVLVPG-PQQAEPHSAWGQEVTVKMQGVLEDR---TVVEKDPKLVFVIGEGDVIQALE                                                         |
| XP_022330048 | LKRKILSKA-PKNAKRPISSDVVTIKVEGNLEDG---TKVDVFESLTFVLGDGDVIAQAWD                                                         |
| XP_007907980 | IQKKILREG-FGDASRPFMGQEVTMKLQGLLEDG---TIVDRDPKLTFFVIGDGDVIAQALE                                                        |
| XP_013859000 | LRKKVLEPG-DAQVPLPSWGQEVTVRLQGVLEDR---TVVEKDCKLVFVIGESDVIQALE                                                          |
| XP_019737313 | LGKKVLEPA-APGAPRPVRGQQAAMQAVLEDR---TVVEKDRELLFTIGEGDVSQALE                                                            |
| XP_021427237 | LRKKVLAPG-PQKAEHPAWGQEVTVKMQGVLEDR---SVVEKDRKLVFVIGEGDVIQALE                                                          |
| XP_023827235 | LRKKVLVPG-PQQAEPHSAWGQEVTVKMQGVLEDR---TVVEKDCKLVFVIGEGDVIQALE                                                         |
| XP_023827230 | LRKKVLVPG-PQQAEPHSAWGQEVTVKMQGVLEDR---TVVEKDCKLVFVIGEGDVIQALE                                                         |
| XP_008309233 | LRKKVLEPV-EPHVPHPTWGQEVTVKMQGVLEDR---TVVEKDCKLVFVIGEGDVIQALE                                                          |
| XP_024269308 | LRKKVLVPG-PQQAEPHSAWGQEVTVKMQGVLEDR---TVVEKDCKLVFVIGEGDVIQALE                                                         |
| XP_002932306 | LKKKILKAG-HGKATIPLPGQEVTVHLMGILEDG---SLVEKDCKLVFVIGEGDVIQALE                                                          |
| XP_022785584 | LQKRVLRG-KGQDTRPDKGQRVMIQSAGRTEDG---TAVDWNSSLEFILGEGEVIQAFD                                                           |
| XP_008309234 | LRKKVLEPV-EPHVPHPTWGQEVTVKMQGVLEDR---TVVEKDCKLVFVIGEGDVIQALE                                                          |
| XP_013386268 | LKKKVLKKG-DGLSSRPQGRQRPVISFSAHTEDG---TVVDSETQLMITLGDGCDVQAMD                                                          |
| XP_005928731 | LRKKVLEPG-TPQGPHPAWDQEVTVKMQCVLEDR---TVVEKDCKLVFVIGEGDVIQALE                                                          |
| XP_002119960 | LKKKTVTKG-QGRDTRPERGQEVTVLDTLRSSDG---TILEEMHSVTFILGDHEVPESLD                                                          |
| XP_024235293 | LRKKVLAPG-PQKAEPHSAWGQEVTVKMQGVLEDR---SVVEKDRKLVFVIGEGDVIQALE                                                         |
| XP_005729996 | LRKKVLEPG-TPQGPHPAWDQEVTVKMQCVLEDR---TVVEKDCKLVFVIGEGDVIQALE                                                          |
| XP_018619414 | LRKKVLEQG-PEPSSRPWTWGQEVTVRLQGVLEDR---TVVEKDSKLVFVIGEGDVIQALE                                                         |
| XP_012796312 | I I K K T L K K G - L G G E T R P S H G D S V V V N Y K C W L E D G --- T L V D D A E N V K M V L G D G D I I H A F D |
| XP_004553258 | LRKKVLEPG-TPQGPHPAWDQEVTVKMQCVLEDR---TVVEKDCKLVFVIGEGDVIQALE                                                          |
| CDQ72337     | LRKKVLVPG-PQQAEPHSAWGQEVTVKMQGVLEDR---TVVEKDCKLVFVIGEGDVIQALE                                                         |
| XP_024269303 | LRKKVLVPG-PQQAEPHSAWGQEVTVKMQGVLEDR---TVVEKDCKLVFVIGEGDVIQALE                                                         |
| XP_024269307 | LRKKVLVPG-PQQAEPHSAWGQEVTVKMQGVLEDR---TVVEKDCKLVFVIGEGDVIQALE                                                         |



|              |                                                               |
|--------------|---------------------------------------------------------------|
| XP_024269300 | LRKKVLVPG-PQQAHPAWGQEVTVKMQGVLEDR---TVVEKDPKLVFVIGEGDVNQALE   |
| XP_017893134 | LKKKVIKQG--KNGTRPNRSDICILDIIGKLQ-DG--TKVEEYKNLKIQLGDVEVIQGLD  |
| XP_021454564 | LRKKVLVPG-PQQAHPAWGQEVTVKMQGVLEDR---TVVEKDPKLVFVIGEGDVNQALE   |
| XP_003967095 | LRKKVLESS-DPSGSPSPSWGQEVTVKMQGVLEDR---TVVEKDSKLVFVIGEGDVNQALE |
| XP_021454548 | LRKKVLVPG-PQQAHPAWGQEVTVKMQGVLEDR---TVVEKDPKLVFVIGEGDVNQALE   |
| XP_023697743 | LRKKIVQQG-LQQWTRPVWGQEVTVKLGILEDR---TVVEKDSKLVFVTGEGDVHQALE   |
| PIK51124     | LLKKILTPG-KGRTTNPKADQIVTLRTKGWLEDG---TEVDWNDSITICLGDGDAVQAWD  |
| XP_020311464 | LRKKVLAPG-PQKAHPAWGQEVTVKMQGVLEDR---SVVEKDRKLVFVIGEGDVNQALE   |
| XP_017261735 | LRKKVLKPG-NPQVPGPSWGQEVTVRMQGVLEDR---TVVEKDCNLVVFVIGERDVIQALE |
| XP_011312767 | LRKKTLTKG--TNNTRPQRNDICTIDIVGRLE-DGT-E-VECLPDFVQVLGDVELIQGLD  |
| XP_022047038 | LRKKVLKCG-TLQAPHPTWGQEVTVKMQGVLEDR---TVVEKDCKLVFVIGEGDVNQALE  |
| XP_003427294 | LRKKVLKAG--KENSRRPNRSDVCVLKFTGRLE-DG--TIVEEEEDIKIQLGDMEVIQGLD |
| XP_020139363 | -----GPG--GFAQRGPDGSGSGAASAPALFVP---PTPQPHFPIASVRGESDTWGAHS   |
| XP_011661975 | LRKKVLKAG-QGEAARPDGRGMAMTVRYKGMLEDG---TEVEGEEKATFTQGEGEIVQAI  |
| XP_021263191 | LRKRVRVDG-QG-G-APQPGQEVSVKVLGALEDG---GLVERDPRLSFVPGQGDVAQALE  |
| XP_005110253 | LKKKVLVPG-K-EDTRPTNGDTVIRVDGVLENG---THVD-VQDFTFILNDGDVILAFD   |
| OCT89685     | LKKKILKAG-RGRATIPLPGQEVTVIHLMGILEDG---SLVEIDPKLSFVLDEGDVIQALE |
| XP_018106932 | LKKKILKAG-RGRATIPLPGQEVTVIHLMGILEDG---SLVEIDPKLSFVLDEGDVIQALE |
| XP_022609905 | LRKKVLEPV-APHSCLPTWGQEVTVKMQGVLEDR---TVVEKDCKLVFVIGEGDVNQALE  |
| XP_023278137 | LRKKVLEPV-APHSCLPTWGQEVTVKMQGVLEDR---TVVEKDCKLVFVIGEGDVNQALE  |
| XP_023151164 | LRKKVLKCG-TLQAPHPTWGQEVTVKMQGVLEDR---TVVEKDCKLVFVIGEGDVNQALE  |
| OON20683     | ITKKILTKG-LGRESRPNHGDVLEISFKGYLEDG---TIVDDVASMVCTLGDGDVIALD   |
| XP_014340350 | LRKKIMKEG-DTEAAKPLPGQEVTVKLGAMEDG---TFVEKDPKLVFVIGEGDVNQALE   |
| XP_012284026 | LIKTVLKPG--KKGTRPNKSDICTLKMSGKLE-DG--TIVEEYEELIIQLGDVEVVQGLD  |
| OAD61952     | LKMKVIKSG--KDGTRPNRSDICILKIIGKLK-DG--TIVEEYEDLKIQLGDVEVIQGLD  |
| XP_023962949 | LRKLLVREG-QGEASRPQPGQEVTVKLLGVLEDG---SLVEKDPKLVFILEQGDVIQALE  |
| XP_008121023 | LRKCLVKQG-HG--SRPQAGQEMAVKLLGALEDG---SLVERDPRLTFVLGQWEAIQALE  |
| XP_017763036 | LKMKVIKSG--KDGTRPNRSDICILKIIGKLK-DG--TIVEEYEDLKIQLGDVEVIQGLD  |
| XP_017691650 | LRKRVRVAG-LG-GPQPRPGQEVSVKVLGALEDG---GLVERDPRLTFVPGHGDVVQALE  |
| XP_012710521 | LRKKVLQSG-DIHVPHTWDQEVTVKMQGVVEDR---TVVEKDCKLVFVIGEGDVNQALE   |
| XP_015819997 | LRKKVLQNG-DSQVLHPVWGQEVTVKMQGVLEDR---TVVEKDCKLVFVIGEGDVNQALE  |
| XP_023962948 | LRKLLVREG-QGEASRPQPGQEVTVKLLGVLEDG---SLVEKDPKLVFILEQGDVIQALE  |
| XP_019921720 | LKRKILRAA-AKNAKRPISSDLVTIKVEGKLEDG---TKVDVYDLSLFLGDGDVIAWD    |
| XP_020904887 | LKRKILREG-KGRDTRPDRGQIVMIRTAGRLSDG---TPVDWNQCLDFILGEGEVIQAWD  |
| XP_024138547 | LRKKVLKCG-DVQVPRPTWGQEVTIMMQGVLEDR---TVVEKDCKLVFVIGEGDVNQALE  |
| AWP08482     | LRKKVLEPV-APHALSPIWGQEVTKMQGVLEDR---TVVEKDRKLVFVIGEGDVNQALE   |
| CDQ67637     | LRKKVLAPG-PQKAHPAWGQEVTVKMQGVLEDR---SVVEKDRKLVFVIGEGDVNQALE   |
| XP_011423840 | LKRKILRAA-AKNAKRPISSDLVTIKVEGKLEDG---TKVDVYDLSLFLGDGDVIAWD    |
| XP_014808190 | LRKRVRVDG-QG-GPRPQPGQEVSVKVLGALEDG---GLVERDPRLTFVPGHGDVVQALE  |
| XP_007059625 | LRKLLVREG-QGEASRPQPGQEVTVKLLGVLEDG---SLVEKDPMLTFTLEQGDVIQALE  |
| XP_024138546 | LRKKVLKCG-DVQVPRPTWGQEVTIMMQGVLEDR---TVVEKDCKLVFVIGEGDVNQALE  |
| EMP36068     | LRKLLVREG-QGEASRPQPGQEVTVKLLGVLEDG---SLVEKDPMLTFTLEQGDVIQALE  |
| XP_024138543 | LRKKVLKCG-DVQVPRPTWGQEVTIMMQGVLEDR---TVVEKDCKLVFVIGEGDVNQALE  |
| OXU31097     | LRKKVLKAG--KENSRRPNRSDVCVLKFTGRLE-DG--TIVEEEEDIKIQLGDMEVIQGLD |
| XP_022202921 | LKKKVIREG--KPDTRPQRADICQVKFEGRL-NGE--IIEKEDCLTINIGDGEVIQGLD   |
| XP_006557516 | LKKKVIKNG--KNGTRPNRSDICTLKIIGKLK-DN--TIVEKYEDLKIQLGDVELIQGLD  |
| XP_016770764 | LKKKVIKNG--KNGTRPNRSDICTLKIIGKLK-DN--TIVEKYEDLKIQLGDVELIQGLD  |
| XP_006615021 | LKKKVIKNG--KNGTRPNRSDICTLKIIGKLK-DN--TIVEKYEDLKIQLGDVELIQGLD  |
| XP_008546855 | LKKKTIVKG--QKGTTPNQDGLCTVDITGSLTPDGK-EVIETLKAFTVQLGDHEVIQGLE  |
| XP_006557515 | LKKKVIKNG--KNGTRPNRSDICTLKIIGKLK-DN--TIVEKYEDLKIQLGDVELIQGLD  |
| XP_007254541 | LRKKVLEAG-PERAPCPVWGQEVTLKMQGVLEDR---TMVEKDCKLVFVIGEGDVNQALE  |
| XP_006615020 | LKKKVIKNG--KNGTRPNRSDICTLKIIGKLK-DN--TIVEKYEDLKIQLGDVELIQGLD  |
| XP_006557514 | LKKKVIKNG--KNGTRPNRSDICTLKIIGKLK-DN--TIVEKYEDLKIQLGDVELIQGLD  |
| XP_011053698 | LMKKVIKKG--TKDVKPIQKDICTLKFTGVLD-DG--TVVEDQNNISIQLGDFEIVQGLD  |
| XP_007254540 | LRKKVLEAG-PERAPCPVWGQEVTLKMQGVLEDR---TMVEKDCKLVFVIGEGDVNQALE  |
| XP_006615019 | LKKKVIKNG--KNGTRPNRSDICTLKIIGKLK-DN--TIVEKYEDLKIQLGDVELIQGLD  |
| XP_016913411 | LKKKVIKNG--KNGTRPNRSDMCTLKIIGKLK-DN--TIVEKYEDLKIQLGDVELIQGLD  |
| XP_017559733 | LRKKILEPG-PEQAPCPVWGQEVMLKMQGVLEDR---TMVEKDSKLVFVIGEGDVNQALE  |

|              |                                                                |
|--------------|----------------------------------------------------------------|
| PKU40687     | LRKRVVQDG-QG-GPRPQPGQEVSVKVLGALEDG---GLVERDPRLTFVPGHGDVVQALE   |
| XP_016913410 | LKKKVIKNG--KNGTRPNRSDMCTLKIIGKLG-DN--TIVEKYEDLKIQLGDVELIQGLD   |
| EGI65888     | LMKKVIKKG--TKDVKPIQKDICTLKFTGVLD-DG--TVVEDQNNISIQLGDFEIVQGLD   |
| XP_014252350 | LKKKVLKPG-EP-DSRPTKPDVCEISFEGRLEDG---TVVDKEDRIEVFLGDNDTAQGID   |
| XP_012165944 | LRKKVIKSG--KNGTRPNRSDICTLKIIGKLG-DG--TVEEYEDLKIQLGDVEVIQGLD    |
| XP_016913409 | LKKKVIKNG--KNGTRPNRSDMCTLKIIGKLG-DN--TIVEKYEDLKIQLGDVELIQGLD   |
| XP_011053696 | LMKKVIKKG--TKDVKPIQKDICTLKFTGVLD-DG--TVVEDQNNISIQLGDFEIVQGLD   |
| XP_019934661 | LRKKVLEPA-APLVPCPTWQGEVAIKMQCVLEDR---TVVEKDRKLVFVIGEGDVNQALE   |
| XP_008304064 | LRKKVLERG-TLQAPHPTWQGEVAVKMQCVLEDR---TVVEKDCKLVFVIGEGDVNQALE   |
| XP_011053695 | LMKKVIKKG--TKDVKPIQKDICTLKFTGVLD-DG--TVVEDQNNISIQLGDFEIVQGLD   |
| CAX74525     | VVIKTLRKG-LGRETRPSHGD TVVINYKGWLEDG---TLVDDVENAKIVLGDGDVIHAFD  |
| XP_023811597 | LRKKVLKSG-DVQIPHPTWQGEVTVMQGVLEDR---TVVEKDCKLVFVIGEGDVNQALE    |
| EFZ15418     | LKKKVIQKG--KENVKPHKGDICTIKMSGVLD-DN--TVVEDYDNLTIQIGDLEVVQGLD   |
| OPJ70235     | LRKRVRDG-QD-EPRPRPGQEVSVKVLGVLDG---GLVERDPRLTFVPGHGDVVQALE     |
| AAX27902     | VVIKTLRKG-LGRETRPSHGD TVVINYKGWLEDG---TLVDDVENAKIVLGDGDVIHAFD  |
| XP_011053694 | LMKKVIKKG--TKDVKPIQKDICTLKFTGVLD-DG--TVVEDQNNISIQLGDFEIVQGLD   |
| XP_011164040 | LKKKVIQKG--KENVKPHKGDICTIKMSGVLD-DN--TVVEDYDNLTIQIGDLEVVQGLD   |
| XP_011150605 | LKKKVILKG--KNGTRPNRGDICTLKIIGKLG-NNQ-KIVENYEDFVIQLGDVEVVQGLD   |
| EFN77170     | LKKKVILKG--KNGTRPNRGDICTLKIIGKLG-NNQ-KIVENYEDFVIQLGDVEVVQGLD   |
| XP_011164039 | LKKKVIQKG--KENVKPHKGDICTIKMSGVLD-DN--TVVEDYDNLTIQIGDLEVVQGLD   |
| AAH90698     | LKKKVLQAG-PENALTPAWGQEVTLKMQGVLEDR---TVVEKDSKLVFIIIGEGDVTQALE  |
| XP_014606393 | LRKKVIEKG--QNGTRPNTTDYCTLKIIGKLE-AG--KIVEEHENITIQIGDVEVVQGLD   |
| XP_003700328 | LRKKVIRKG--KNGTRPNTSDICTLKIIGKLG-DG--TVEEYELKIQLGDVEVIQGLD     |
| XP_683608    | LKKKVLQAG-PENALTPAWGQEVTLKMQGVLEDR---TVVEKDSKLVFIIIGEGDVTQALE  |
| XP_014606392 | LRKKVIEKG--QNGTRPNTTDYCTLKIIGKLE-AG--KIVEEHENITIQIGDVEVVQGLD   |
| XP_023726255 | LKKKVLKRA--ENGYRQSRSHICEINLQGS LP-DGT--IIDKHDHLSIQIGDAE VVQGLD |
| XP_011404052 | LLKKILKPG-DGVSSRPSPLSEVTMRVLGSLPNG---TVIDKHNSLRFIVSDGDVVQAVD   |
| XP_018337850 | LMKKVIKKG--TQDVKPIQKDICTLKFTGVLD-DG--TVVEDQDNVSIQLGDFE VVQGLD  |
| XP_023726263 | LKKKVLKRA--ENGYRQSRSHICEINLQGS LP-DGT--IIDKHDHLSIQIGDAE VVQGLD |
| XP_012689022 | LRKKVQEPG-PPEAQGPAGQOVTLKMQGVLEDR---MVVEKDTKLVFVIGEGDVNQALE    |
| XP_015190182 | LRKKVIEKG--QSGTRPNTTDYCTLKIIGKLE-SG--KIVEEHENITIQIGDVEVVQGLD   |
| XP_024943519 | LRRKIIKLG--EKGNRPNASDICTLKIIGKLE-DG--TVEEYELTIQIGDIEVIQGLD     |
| XP_015437909 | LKKRVIRKG--KHGTRPTRSDICTLKIIGKLT-DG--TVEEYENLKIQLGDVEVIQGLD    |
| KYN13005     | LMKKIIKKG--TKDVKPIQKDVCTLTFTGVLD-DG--IVVEDQDNVSIQLGDFE VVQGLD  |
| XP_024943518 | LRRKIIKLG--EKGNRPNASDICTLKIIGKLE-DG--TVEEYELTIQIGDIEVIQGLD     |
| XP_012526171 | LKKKVIQKG--EENVKPHNGDMCTIKMIGKLD-DG--TVVEDYNNLTIQIGDMEVIQGLD   |
| XP_012237396 | LKKKVIKSG--KNGTRPNRSDICTLKIIGKLG-DG--TVEEYEDLKIQLGDVEVIQGLD    |
| XP_018372055 | LMKKIIKKG--TKDVKPIQKDVCTLTFTGVLD-DG--IVVEDQDNVSIQLGDFE VVQGLD  |
| XP_015600846 | LRRKIIKLG--EKGNRPNASDICTLKIIGKLE-DG--TVEEYELTIQIGDIEVIQGLD     |
| XP_018372054 | LMKKIIKKG--TKDVKPIQKDVCTLTFTGVLD-DG--IVVEDQDNVSIQLGDFE VVQGLD  |
| XP_023811598 | LRKKVLKSG-DVQIPHPTWQGEVTVMQGVLEDR---TVVEKDCKLVFVIGEGDVNQALE    |
| XP_013086934 | LIKKILTAG-YGIDTRPTNGDIVTLKVEGRREDG---KLVD-NEEITFYLN DGDVILAFD  |
| XP_012340112 | LKKKVIKNG--KNGTRPNRSDICTLKIIGKLG-DN--TIVEKYEDLKIQLGDVELIQGLD   |
| XP_012064601 | LMKKVIKKG--TKDVKPIQKDICTLKFTGMLD-DG--TVVEDQDNISIQLGDFEVIQGLD   |
| XP_021933338 | LKKKILKRA--ESSYRQSRSHICEINLEGR LP-DGT--IVDKHDHLSIQIGDAE VVQGLD |
| XP_020469449 | LRKNVLKPG-DLNALCPTWQGEVTVMQCVLEDR---TVVEKDSKLVFVIGEGDVNQALE    |
| XP_012340111 | LKKKVIKNG--KNGTRPNRSDICTLKIIGKLG-DN--TIVEKYEDLKIQLGDVELIQGLD   |
| XP_014772499 | LTKSIVKKG-DGVLTRPLQGQKVT LKTEGLLPDG---TVIDKNESISFILGDGDVISGWD  |
| XP_021933337 | LKKKILKRA--ESSYRQSRSHICEINLEGR LP-DGT--IVDKHDHLSIQIGDAE VVQGLD |
| XP_002425448 | LKLKTIKQG--EPDSRPQANDICEIRLLGKLN-DG--KIVENFDSLKIELGSHEVVQGE    |
| XP_018053112 | LMKKVIKKG--TKDVKPIQKDICTLKFTGVLD-DG--TVVEDQDNISIQLGDFEVIQGLD   |
| XP_023811595 | LRKKVLKSG-DVQIPHPTWQGEVTVMQGVLEDR---TVVEKDCKLVFVIGEGDVNQALE    |
| XP_003692338 | LKKKVIKNG--KNGTRPNRSDICTLKIIGKLG-DN--TIVEKYEDLKIQLGDVELIQGLD   |
| KQK73886     | LRKRVRDG-QD-GLRPRPGQEVSVKVLGALEDG---GLVERDPRLTFVPGYGDVVQALE    |
| XP_021933339 | LKKKILKRA--ESSYRQSRSHICEINLEGR LP-DGT--IVDKHDHLSIQIGDAE VVQGLD |
| XP_018025482 | LKKKVLVAG--IVETRPVRGDTVCIELTMRLS-DG--TLVEDTHTLYFTLG DSEVIPGLD  |
| XP_019335449 | LRKRVVQQG-RGESTRPCPGQEVTVKLLGVLEDG---SLVEKDPALRFTLGQGDVVQALE   |
| XP_014772498 | LTKSIVKKG-DGVLTRPLQGQKVT LKTEGLLPDG---TVIDKNESISFILGDGDVISGWD  |

|              |                                                                |
|--------------|----------------------------------------------------------------|
| XP_023811594 | LRKKVLKSG-DVQIPHPTWGQEVTVMMQGVLEDR---TVVEKDCKLVFVIGEGDVNQALE   |
| XP_001846585 | LLKKVLQEG--TDE-RPESRDIAVINFTGRLE-DG--TIVEQEQGMVVQIDDDVEVVQGLD  |
| XP_014470017 | LKKKVLLAG--DKGIRPNRSDTCTLKIVGRLE-DND-TIVENYDDLVIQLGQDVEVIQGLD  |
| XP_002111046 | LKKATLVAG-SG--VAPKKQLVTIKYSMHLS-NA--IVVLHDMESQFILGEGEVIPALD    |
| XP_014772494 | LTKSIVKKG-DGVLTRPLQGQKVTIKTEGLLPDG---TVIDKNESISFILGQDGVISGWD   |
| KZS20178     | LKKKTIKKG--TPNARPVTSEICTIKISGELA-DG--TFVDVKDKFSFQLGQDLEVIQGLD  |
| XP_014470016 | LKKKVLLAG--DKGIRPNRSDTCTLKIVGRLE-DND-TIVENYDDLVIQLGQDVEVIQGLD  |
| KFM75734     | FKKKVIKKG-LGHESRPSRGDRVTVDVSYLNE---KLFEENKDLKFIVGDLQDVIQGLD    |
| XP_018900271 | LKKKVTVPG--EPDTRPQFSEICILDYEGRLD-DGT--VIEKEENHRIQLGQDLEVIHGLD  |
| XP_020392992 | LKKKILKYG-NVKLERPGKGQNVKIWVKIMHENG---VILGRQRLSFTINGTQDVKALE    |
| XP_016376789 | IRKKVLQAS-PENALTPAWGQEVTLKMQGVLEDR---TVVEKDCKLVFVIGEGDVNQALE   |
| XP_016345079 | LRKKVLQAS-PENVLTPAWGQEVTLKMQGVLEDR---TVVEKDCKLVFVIGEGDVNQALE   |
| XP_014106477 | LRKRVRAG-PG-GPRPLPGQEVSVKVLGALEDG---GLVERDPRLIFVPGHGDVVLALD    |
| XP_014237957 | LLKKVVKAG--IKNTRPNRSDLTCTIDIGRLE-DG--TIVEEHEDLVVQLGDMETIQGLD   |
| XP_016376788 | IRKKVLQAS-PENALTPAWGQEVTLKMQGVLEDR---TVVEKDCKLVFVIGEGDVNQALE   |
| XP_016376787 | IRKKVLQAS-PENALTPAWGQEVTLKMQGVLEDR---TVVEKDCKLVFVIGEGDVNQALE   |
| CDS28193     | VLIKTINKG-LGQGSRPSHGDSVINYKCYLEDG---TLVEELDNLNIVIGDGDCTHAID    |
| KOC65132     | LKKKVLKKG--KNGTRPNRSDICTLNIIGKLE-DD--TTVENYEDLKIQLGQDVEVIQGLD  |
| XP_017790334 | LKKKVLKKG--KNGTRPNRSDICTLNIIGKLE-DD--TTVENYEDLKIQLGQDVEVIQGLD  |
| XP_020790728 | LRKKILEPG-CP--PCPSWGEEVTVRMQAVLEDR---TVVEKDKLVFVIGEGDVNQALE    |
| XP_012221110 | LKKKVIKEG--EDGTRPNKRDIKLVVCEVN-G---EIVEEKDDFMIQLGDMQEVVQGLD    |
| GAA30660     | -----KG-LGRESRPNHGDLEVSFKGYLEDG---TIVDDVASMVCTLGQDGVVQGLD      |
| XP_012221101 | LKKKVIKEG--EDGTRPNKRDIKLVVCEVN-G---EIVEEKDDFMIQLGDMQEVVQGLD    |
| XP_012221093 | LKKKVIKEG--EDGTRPNKRDIKLVVCEVN-G---EIVEEKDDFMIQLGDMQEVVQGLD    |
| XP_018649440 | ----TLKKG-LGGETRPSHGDSVVVNYKCWLEDG---TLVDDVEDVKMVLGQDGVVQGLD   |
| EFX68474     | LKKKTIVKKG--IPNTRPTTNEICTIKISGELA-DG--KAQDVQEKFSFQLGQDLEVIQGLD |
| XP_023229640 | LKKRVIESG-VGLESRPQRGDWIVIDATGELEDG---TVVEKYDNMTIIVGDSQDVIQGLD  |
| EAT32833     | LLKKVLKEG--QGE-RPESRDIAVINFTGRLE-DG--TVVEEQNCVVQIDDDVEVVQGLD   |
| XP_016344167 | IRKKVLQAS-PENALTPAWGQEVTLKMQGVLEDR---TVVEKDCKLVFVIGEGDVNQALE   |
| XP_016344168 | IRKKVLQAS-PENALTPAWGQEVTLKMQGVLEDR---TVVEKDCKLVFVIGEGDVNQALE   |
| XP_016344166 | IRKKVLQAS-PENALTPAWGQEVTLKMQGVLEDR---TVVEKDCKLVFVIGEGDVNQALE   |
| XP_016376234 | LRKKVLQAS-PENVLTPAWGQEVTLKMQGVLEDR---TVVEKDCKLVFVIGEGDVNQALE   |
| XP_007906811 | LKKITLKSQ-NAQLGKQPQSQNVSIWIKMMHENRK---EVEDPQYISFIIIGEGDVNEALE  |
| KYN04145     | LMKKVIKKG--KKDVKPIRQDICTIKFTGMLD-DG--TVVEDYDDFSIQLGQDFDVIQGLD  |
| XP_014282311 | LMKKVLTGP--IPNSRPQKSDICVLNIVGCLE-DGS--IVEKHENLEINHSDNEVIQGLD   |
| XP_015109871 | LKKKTLIKG--KKNTRPQRNDICTINIVGKLE-NGK-E-VECFIDVAIQLGQDVELIQGLD  |
| CDS42647     | VEKKVLKKG-LGQGSRPGHGDVVISYKQWLEDG---MLVEEVENLSLVIGDGECIHAFD    |
| XP_011870270 | LKKRVIRKG--EKGMREPKGDICTINFVGKLC-DG--TEVEKEDHLSIQVGDLEVIQGLD   |
| XP_011870269 | LKKRVIRKG--EKGMREPKGDICTINFVGKLC-DG--TEVEKEDHLSIQVGDLEVIQGLD   |
| XP_018977514 | LRKKVLQAS-PENVLTPAWGQEVTLKMQGVLEDR---TVVEKDCKLVFVIGEGDVNQALE   |
| XP_007906810 | LKKITLKSQ-NAQLGKQPQSQNVSIWIKMMHENRK---EVEDPQYISFIIIGEGDVNEALE  |
| CDS17605     | VEKKVLKKG-LGQGSRPGHGDVVISYKQWLEDG---MLVEEVENLSLVIGDGECIHAFD    |
| XP_014206998 | LRKKVVKPG--KDNTNPNRLDLCMSFTVKLE-DG--TIVDEAEDLIVQVGDVEYTOGLD    |
| XP_018393954 | LMKKVIKKG--KKDVKPIRQDICTIKFTGMLD-DG--TVVEDYDDFSIQLGQDFDVIQGLD  |
| XP_015929100 | FKKLVIKKG-NGHETRPEKGDRTVRLSCFVND---KLVEEQENLQVIVGDMQDVIQGLD    |
| ELU06040     | LKKKVLTKG-DGE--RPVNGQMVTKCAGHLPDG---KAVDQHDNLRFTLGDQDVIQAFD    |
| XP_024353326 | VEKKVLKKG-LGQGSRPGHGDVVISYKQWLEDG---MLVEEVENLSLVIGDGECIHAFD    |
| EAT35561     | LLKKVLKEG--QGE-RPESRDIAVINFTGRLE-DG--TVVEEQNCVVQIDDDVEVVQGLD   |
| XP_018359770 | LMKKVIKKG--TKDVKPIQKDICTLTFTGVLD-DG--TVVEDQDNVSIQLGDFEVVQGLD   |
| EAT35560     | LLKKVLKEG--QGE-RPESRDIAVINFTGRLE-DG--TVVEEQNCVVQIDDDVEVVQGLD   |
| XP_018319727 | ILKLTLEVG--KLGTRPISLQNCIKYKCYLEDG---VLVEEQDDFEVQIGDNEVVQGLD    |
| XP_001662371 | LLKKVLKEG--QGE-RPESRDIAVINFTGRLE-DG--TVVEEQNCVVQIDDDVEVVQGLD   |
| XP_018319726 | ILKLTLEVG--KLGTRPISLQNCIKYKCYLEDG---VLVEEQDDFEVQIGDNEVVQGLD    |
| XP_001662370 | LLKKVLKEG--QGE-RPESRDIAVINFTGRLE-DG--TVVEEQNCVVQIDDDVEVVQGLD   |
| XP_012269548 | LKKKVVKAG--QPGTRPNRSDICTIKLTGKLE-DG--KVVEDHEKLTQVQLGQDVEVIQGLD |
| PAA92621     | LWKKTLVEG-RGRDSRPQSGDQVTLKLEASLPDG---TPVESESGLIISIGEYDHIQALD   |
| XP_019867812 | IMKKIIHEG--IPDTKPQRLQTCINYTCTLEDG---TVIEEVDGMEIFVGDSDVIQGLD    |
| PAA53270     | LWKKTLVEG-RGRDSRPQSGDQVTLKLEASLPDG---TPVESESGLIISIGEYDHIQALD   |

PAA57938  
XP\_966821  
KXJ84517  
XP\_023345477  
XP\_011494478  
XP\_023345475  
XP\_016940923  
XP\_023345476  
PNF41144  
XP\_019932587  
XP\_019932586  
XP\_016028426  
XP\_016958803  
EKC18274  
PNF41145  
XP\_011636531  
XP\_017014991  
XP\_001974711  
XP\_024874265  
NP\_611353  
XP\_016984960  
XP\_017054378  
XP\_024874264  
XP\_019545364  
XP\_019545363  
XP\_014670901  
XP\_017079421  
XP\_013113222  
XP\_002034480  
XP\_017031858  
XP\_015788695  
XP\_017117238  
XP\_015364528  
XP\_017836078  
XP\_316645  
XP\_002091890  
XP\_009022869  
XP\_020815089  
KY018601  
XP\_023307145  
XP\_004526322  
XP\_017468465  
XP\_011213061  
ETN59059  
XP\_019877780  
XP\_001951673  
XP\_002062976  
XP\_001986816  
XP\_022181773  
XP\_002048800  
XP\_018801327  
XP\_020300622  
XP\_011193416  
XP\_017960399  
ACO13176  
XP\_011350211  
KRT81327  
XP\_023162735

LWKKTLVEG-RGRDSRPQSGDQVTLKLEASLPDG---TPVESESGLIISIGEYDHIQALD  
LLKKIVKEG--QANTRPQRLQKCTISYELSLADG---TFIERKDNEEIQLGDCDVVQGLD  
LLKKVLKEG--QGE-RPESKDIAVINYTGRLD-DG--TIVEEERDCVVQIDDDVEVVQGLD  
LRKKILIEG-TGD--KPKDSIRVRIHLKEFLYEDG---DCIKDEELEMNVGEFELVQALD  
LKKKVLKAG--KQNSRPNRSDLCVFKFIGKLE-DG--TIIENEEIITIQLGDMEVVQGLD  
LRKKILIEG-TGD--KPKDSIRVRIHLKEFLYEDG---DCIKDEELEMNVGEFELVQALD  
LIKRTIKKAPENNDRRPLRGELVTNLNIGKLD-NG--KVVEEEKNFQCHVGDFEVVQGLD  
LRKKILIEG-TGD--KPKDSIRVRIHLKEFLYEDG---DCIKDEELEMNVGEFELVQALD  
LKKKVLKRA--ENGYRPQRSHICEINLQGSPL-DGT--IIDKHDHLSIQIGDAEVVQGLD  
LLKKVLKEG--QGE-RPESKDIAINYTGRLD-DG--TIVEEERDCVVQIDDDVEVVQGLD  
LLKKVLKEG--QGE-RPESKDIAINYTGRLD-DG--TIVEEERDCVVQIDDDVEVVQGLD  
LIKRTIKKAPQDSFRRPVRGELVTNFTGKLD-NG--TVVENELNFQCHVGDIYEVVQGLD  
LIKRTIKKAPEDGGRPLRGELVTNLNIGKLD-NG--KVVEEEKNFQCHVGDFEVVQGLD  
LKRKILRAA-AKNAKRPISSDLVTIKVEGKLEDG---TKVDVYDSLFSFVLGDGDVQAWD  
LKKKVLKRA--ENGYRPQRSHICEINLQGSPL-DGT--IIDKHDHLSIQIGDAEVVQGLD  
IKKKVLKKG--KDDTRPNRGDICTINIVGTLD-DG--TVAERYNDLTIQIGDMEVVQGLD  
LIKRTIRKAPEDGGRPLRGELVTNLNIGKLD-NG--QVVEEEKNFQCHVGDFEVVQGLD  
LIKRTIKKAPQDSVRRPIRGELVTNFTGKLD-NG--TVVEKELNFQCHVGDIYEVVQGLD  
LKKRVVKKG--EQNVKPPQRGDICTVTIMGVLD-SG--KVVEEHVDKQIQTGDMEVVQGLD  
LIKRTIKKAPQDSFRRPVRGELVTNFTGKLD-NG--TVVENELNFQCHVGDIYEVVQGLD  
LIKRTIKKAPEDGGRPLRGELVTNFTGKLD-NG--KVVEEEKNFQCHVGDIYEVVQGLD  
LIKRTIKKPPVDGGRPLRGELVTNLNFTGKLD-NG--KVVDDEKNFQCHVGDIYEVVQGLD  
LKKRVVKKG--EQNVKPPQRGDICTVTIMGVLD-SG--KVVEEHVDKQIQTGDMEVVQGLD  
LLKKVLKEG--QGE-RPESKDIAINYTGRLD-DG--TIVEEERDCVVQIDDDVEVVQGLD  
LLKKVLKEG--QGE-RPESKDIAINYTGRLD-DG--TIVEEERDCVVQIDDDVEVVQGLD  
-----METRPERGSLVKLSYSGKLDDG---TEVDTCECKEFVLGDGDMIHGLE  
LIKRTIKKPPQEEARRPVRGELVTNLNIGKLD-NG--KVVEDEKNFQCHVGDIYEVVQGLD  
LIKRVLKKK--TSNKRPPQRGDICTVFTGKLE-NG--KIVEKQENFEIHVGDFEVIQGLD  
LIKRTITKAPQDSFRRPVRGELVTNFTGKLD-NG--TVVENELNFQCHVGDIYEVVQGLD  
LIKRIKKAPKQADQ-PSRGFLVTINFTGKLD-NG--KVVEEEKGFQCHIGDFEVVQGLD  
ILKKVIEG-NKEKARPEKGRVKINLSVFLKDS--EKVESLDGIEIFVGDCLNHAVD  
LIKRTIKKAPGDVDRPLRGELVTNLNFTGKLD-NG--KVVEEEKNFQCHVGDIYEVVQGLD  
LLKKIIEG--APDERPMKGEQIVINLVGRLE-END-DIFEKEENFEITLGDCEVIQGV  
LIKRIKKSPANAKR-PSRGDLVKVRFRTAKLD-DG--TVVEQEDNFECHVGDLIVQGLD  
LLKKVLKKG--RSELRPESKDLVTVSYTGRL-DG--TVVEEQSNVAVVQIDDDVEVVQGLD  
LIKRTIKKAPQDSLRRPIRGELVTNFTGKLD-NG--TVVEKEINFQCHVGDIYEVVQGLD  
IKKRVIMKG-DEKACRPRNGQIQKCSGKLDDG---TVVDVHEKLTALGEDEHINAFD  
LIKRIKKAPKQANQ-PSRGFLVTINFTGKLD-NG--KVVEEEKGFQCHIGDFEVVQGLD  
LKRKVVQOG-RGESTRPCPGQEVTVKLLGVLEDG---SLVEKDPALRFTLQGGDVVQALE  
LIKRVIKKS--KVEKKPQRGELVTISFTGKLD-DG--TVVEKEENYQVHVGDYEVVQGLD  
LVKRVLKPS--QLDRRPMRGDLATITYSGKLP-NG--IVVEQKENYQVHVGDYEVVQGLD  
LVKRVLKQS--TTGKRPTRGDLVTVSFTGKLP-DG--TVVEQKKNFQMHVGDFEVVQGLD  
LVKRVIKQS--QLSTRPARGDLVTVTFTKGRMP-NG--IVVEEKENYQIHVGDIYEVVQGLD  
LLKKVLRKG--LTEMPESKDIAISYTGRL-DG--TIVEEEHEAVVQIDDDVEVVQGLD  
IMKKIIEG--LPDTKPPQRLQKCRINYCTLEDDP--EVILQEEGNEIFLGDCDVIQGLD  
LLKKIIEG--ALDERPMKGEQIVINLVGRLE-DND-DIFEKEENFEITLGDCEVIQGV  
LIKRTIKKASSTSNRRPTRGDLVTINFTGKLD-NG--SLVEEEKNFQCHVGDIYEVVQGLD  
LLKRIKKASSAKR-PNRGDLVTITYTGKLE-NG--TIVEKEERFQCHVGDLVVQGLD  
LLKKIIEG--ALDERPMKGEQIVINLVGRLE-DND-DIFEKEDNFEITLGDCEVIQGV  
LIKRIKKAPANAKR-PSRGDLVTITYTGKLE-DG--TVVEKEERFQCHVGDFEVVQGLD  
LVKRIIKQS--QLSTRPARGDLVTVTFTKGRIP-NG--IVVEKKNYQIHVGDIYEVVQGLD  
LKRKRVIREG--KPSTRPERGDLVCLNITGQLE-SD--KIVDVHKNKVVQLGDFEVIMGLD  
LVKRVIKQS--QTSNRPARGDLVTVTFTGRLA-NG--IVVEKMENYQMHVGDFEVVQGLD  
LIKRIKKAPANAKR-PNRGDLVTITYTGKLE-DG--TVVEKEERFQCHVGDFEVVQGLD  
LKKRILSEG-TPDT-KPEPGDEVKVVISG-THLGV---EVIPEETLTFRLAEFEAPKALD  
LMKKIIEG--KEWTKPVRGDICTVNITGRFE-NSQ--ITVEEHTNLEIIVGDGDIVQGLD  
IMKKVIQAG--TPDSRPQRLQICEINYESKLESG---ILVEKCNFIMQLGDCDVIQGLD  
LIKRIKKAPANAKR-PNRGDLVTITYTGKLE-DG--TVVEKEERFQCHVGDFEVVQGLD

|              |                                                                |
|--------------|----------------------------------------------------------------|
| XP_019771996 | IMKKVLKEG--QPDSRPSRSSRCVINYTCKLEEAHEDDFADVADNYELGLGEGDVVQGLD   |
| XP_005176045 | LVKRVLKKS--KVNKRPPQRGDKVTLNFTGKLD-DG--RVVEKQENFQVHVGD FEVIQGLD |
| XP_014095636 | LVKRVIKQS--QLIARPARGDLVTVTFNGRMP-NG--IVVEKKENYQIHVG DYEVVQGLD  |
| XP_017867395 | LIKRIIKKAPANAKR-PNRGDLVTITYTGKLE-DG--TVVEKEERFQCHVG DFEVVQGLD  |
| XP_002004550 | LIKRIIKKAPANAKR-PNRGDLVTITYTGKLE-DG--TVVEKEERFQCHVG DFEVVQGLD  |
| XP_022921247 | ILKRVIKKG--ENDLKPQKYHVCKINYVCKLENG---LEVEREENFLMQVDGCDVVQGLD   |
| XP_002015767 | LIKRIIKKAPEDAKS-PSRGELVTISFTGKLE-DG--KVVEEEKNFQCHVG DYEVAQGLD  |
| XP_001360319 | LIKRIIKKAPEDAKS-PSRGELVTISFTGKLE-DG--KVVEEEKNFQCHVG DYEVAQGLD  |
| XP_017147297 | LIKRIIKKAPEDAKS-PSRGELVTISFTGKLE-DG--KVVEEEKNFQCHVG DYEVAQGLD  |
| XP_019879021 | LMKRILIGG--QPDTKPLALQLCTINYSISLEPE---TELNRAIDQTITLGD CDILHGID  |

|              |                                                          |
|--------------|----------------------------------------------------------|
| NP_036313    | LSVPLMDVGETAMVTADSKYCYGPQGS-----RSPY---IPPHAALCLEVTLKTAV |
| NP_001295302 | LSVPLMDVGETAMVTADSKYCYGPQG-----RSPY---IPPHAALCLEVTLKTAV  |
| XP_003817801 | LSVPLMDVGETAMVTADSKYCYGPQG-----RSPY---IPPHAALCLEVTLKTAV  |
| XP_010384957 | LSVPLMDVGETAMVTADSKYCYGPQG-----RSPY---IPPHAALCLEVTLKTAV  |
| XP_003817802 | LSVPLMDVGETAMVTADSKYCYGPQG-----RSPY---IPPHAALCLEVTLKTAV  |
| XP_011747960 | LSVPLMDVGETAMVTADSKYCYGPQG-----RSPY---IPPHAALCLEVTLKTAV  |
| XP_003915233 | LSVPLMDVGETAMVTADSKYCYGPQG-----RSPY---IPPHAALCLEVTLKTAV  |
| EHH59371     | LSVPLMDVGETAMVTADSKYCYGPQG-----RSPY---IPPHAALCLEVTLKTAV  |
| XP_005588521 | LSVPLMDVGETAMVTADSKYCYGPQG-----RSPY---IPPHAALCLEVTLKTAV  |
| XP_002828980 | LSVPLMDVGETAMVTADSKYCYGPQG-----RSPY---IPPHAALCLEVTLKTAV  |
| PNJ28395     | LSVPLMDVGETAMVTADSKYCYGPQGS-----RSPY---IPPHAALCLEVTLKTAV |
| XP_011949838 | LSVPLMDVGETAMVTADSKYCYGPQG-----RSPY---IPPHAALCLEVTLKTAV  |
| XP_018870801 | LSVPLMDVGETAMVTADSKYCYGPQG-----RSPY---IPPHAALCLEVTLKTAV  |
| XP_007993999 | LSVPLMDVGETAMVTADSKYCYGPQG-----RSPY---IPPHAALCLEVTLKTAV  |
| XP_014978797 | LSVPLMDVGETAMVTADSKYCYGPQG-----RSPY---IPPHAALCLEVTLKTAV  |
| XP_011747796 | LSVPLMDVGETAMVTADSKYCYGPQG-----RSPY---IPPHAALCLEVTLKTAV  |
| XP_003915232 | LSVPLMDVGETAMVTADSKYCYGPQG-----RSPY---IPPHAALCLEVTLKTAV  |
| XP_002828981 | LSVPLMDVGETAMVTADSKYCYGPQG-----RSPY---IPPHAALCLEVTLKTAV  |
| XP_010328455 | LSVPLMDVGETAMVTADSKYCYGPQG-----RSPY---IPPHAALCLEVTLKTAV  |
| XP_008969279 | LSVPLMDVGETAMVTADSKYCYGPQGS-----RSPY---IPPHAALCLEVTLKTAV |
| XP_011845848 | LSVPLMDVGETAMVTADSKYCYGPQG-----RSPY---IPPHAALCLEVTLKTAV  |
| XP_024207707 | LSVPLMDVGETAMVTADSKYCYGPQGS-----RSPY---IPPHAALCLEVTLKTAV |
| XP_011526166 | LSVPLMDVGETAMVTADSKYCYGPQGS-----RSPY---IPPHAALCLEVTLKTAV |
| XP_011949835 | LSVPLMDVGETAMVTADSKYCYGPQG-----RSPY---IPPHAALCLEVTLKTAV  |
| XP_017356796 | LSVPLMDVGETAMVTADSKYCYGPQG-----RSPY---IPPHAALCLEVTLKTAV  |
| XP_008969278 | LSVPLMDVGETAMVTADSKYCYGPQGS-----RSPY---IPPHAALCLEVTLKTAV |
| NP_001247999 | LSVPLMDVGETAMVTADSKYCYGPQGS-----RSPY---IPPHAALCLEVTLKTAV |
| XP_024307207 | LSVPLMDVGETAMVTADSKYCYGPQGS-----RSPY---IPPHAALCLEVTLKTAV |
| XP_016791013 | LSVPLMDVGETAMVTADSKYCYGPQGS-----RSPY---IPPHAALCLEVTLKTAV |
| XP_009192156 | LSVPLMDVGETAMVTADSKYCYGPQGS-----RSPY---IPPHAALCLEVTLKTAV |
| XP_024307210 | LSVPLMDVGETAMVTADSKYCYGPQGS-----RSPY---IPPHAALCLEVTLKTAV |
| XP_005588520 | LSVPLMDVGETAMVTADSKYCYGPQGS-----RSPY---IPPHAALCLEVTLKTAV |
| XP_011747874 | LSVPLMDVGETAMVTADSKYCYGPQGS-----RSPY---IPPHAALCLEVTLKTAV |
| XP_024092631 | LSVPLMDVGETAMVTADSKYCYGPQGS-----RSPY---IPPHAALCLEVTLKTAV |
| XP_004060362 | LSVPLMDVGETAMVTADSKYCYGPQGS-----RSPY---IPPHAALCLEVTLKTAV |
| XP_011949836 | LSVPLMDVGETAMVTADSKYCYGPQGS-----RSPY---IPPHAALCLEVTLKTAV |
| XP_007993998 | LSVPLMDVGETAMVTADSKYCYGPQGS-----RSPY---IPPHAALCLEVTLKTAV |
| XP_014978796 | LSVPLMDVGETAMVTADSKYCYGPQGS-----RSPY---IPPHAALCLEVTLKTAV |
| XP_009251263 | LSVPLMDVGETAMVTADSKYCYGPQGS-----RSPY---IPPHAALCLEVTLKTAV |
| XP_011747747 | LSVPLMDVGETAMVTADSKYCYGPQGS-----RSPY---IPPHAALCLEVTLKTAV |
| XP_017822960 | LSVPLMDVGETAMVTADSKYCYGPQG-----RSPY---IPPHAALCLEVTLKTAV  |
| XP_009192157 | LSVPLMDVGETAMVTADSKYCYGPQGS-----RSPY---IPPHAALCLEVTLKTAV |
| XP_010328454 | LSVPLMDVGETAMVTADSKYCYGPQGS-----RSPY---IPPHAALCLEVTLKTAV |
| XP_011845855 | LSVPLMDVGETAMVTADSKYCYGPQGS-----RSPY---IPPHAALCLEVTLKTAV |
| XP_012299012 | LSVPLMDVGETAMVTADSKYCYGPQG-----RSPY---IPPHAALCLEVTLKTAV  |
| XP_011949833 | LSVPLMDVGETAMVTADSKYCYGPQGS-----RSPY---IPPHAALCLEVTLKTAV |

|              |                                                          |
|--------------|----------------------------------------------------------|
| XP_017356795 | LSVPLMDVGETAMVTADSKYCYGPQGS-----RSPY---IPPHAALCLEVTLKTAV |
| XP_014401247 | LSVPLMDVGETAMVTADSKYCYGPQG-----RSPY---IPPHAALCLEVTLKTAV  |
| EPQ12447     | LSVPLMDVGETAMVTADSKYCYGPQG-----RSPY---IPPHAALCLEVTLKTAV  |
| XP_008154612 | LSVPLMDVGETAMVTADSKYCYGPQG-----RSPY---IPPHAALCLEVTLKTAV  |
| XP_016066232 | LSIPLMDVGETAMVTADSKYCYGPQG-----RSPY---IPPHAALCLEVTLKTAV  |
| XP_012584673 | LSVPLMDVGETAMVTADSKYCYGPQG-----RSPY---IPPHAALCLEVTLKTAV  |
| XP_015413209 | LSVPLMDVGETAMVTADSKYCYGPQG-----RSPY---IPPHAALCLEVTLKTAV  |
| XP_022262557 | LSVPLMDVGETAMVTADSKYCYGPQG-----RSPY---IPPHAALCLEVTLKTAV  |
| XP_023103313 | LSVPLMDVGETAMVTADSKYCYGPQG-----RSPY---IPPHAALCLEVTLKTAV  |
| XP_019271925 | LSVPLMDVGETAMVTADSKYCYGPQG-----RSPY---IPPHAALCLEVTLKTAV  |
| XP_007088417 | LSVPLMDVGETAMVTADSKYCYGPQG-----RSPY---IPPHAALCLEVTLKTAV  |
| XP_002761955 | LSVPLMDVGETAMVTADSKYCYGPQGS-----RSPY---IPPHAALCLEVTLKTAV |
| XP_014921066 | LSVPLMDVGETAMVTADSKYCYGPQG-----RSPY---IPPHAALCLEVTLKTAV  |
| XP_005972346 | LSVPLMDVGETAMVTADSKYCYGPQG-----RSPY---IPPHAALCLEVTLKTAV  |
| XP_006058025 | LSVPLMDVGETAMVTADSKYCYGPQG-----RSPY---IPPHAALCLEVTLKTAV  |
| XP_017905457 | LSVPLMDVGETAMVTADSKYCYGPQG-----RSPY---IPPHAALCLEVTLKTAV  |
| XP_019271923 | LSVPLMDVGETAMVTADSKYCYGPQG-----RSPY---IPPHAALCLEVTLKTAV  |
| XP_008542456 | LSVPLMDVGETAMVTADSKYCYGPQG-----RSPY---IPPHAALCLEVTLKMAV  |
| XP_006186302 | LSVPLMDVGETAMVTADSKYCYGPQG-----RSPY---IPPHAALCLEVTLKTAV  |
| XP_006199114 | LSVPLMDVGETAMVTADSKYCYGPQG-----RSPY---IPPHAALCLEVTLKTAV  |
| XP_010970466 | LSVPLMDVGETAMVTADSKYCYGPQG-----RSPY---IPPHAALCLEVTLKTAV  |
| XP_024416679 | LSVPLMDVGETAMVTADSKYCYGPQG-----RSPY---IPPHAALCLEVTLKTAV  |
| XP_005652984 | LSVPLMDVGETAMVTADSKYCYGPQG-----RSPY---IPPHAALCLEVTLKAAV  |
| XP_014687059 | LSVPLMDVGETAMVTADSKYCYGPQG-----RSPY---IPPHAALCLEVTLKMAV  |
| XP_015344756 | LSVPLMDVGETAMVTADSKYCYGPQG-----RSPY---IPPHAALCLEVTLKTAV  |
| XP_012299010 | LSVPLMDVGETAMVTADSKYCYGPQGS-----RSPY---IPPHAALCLEVTLKTAV |
| XP_019819388 | LSVPLMDVGETAMVTADSKYCYGPQG-----RSPY---IPPHAALCLEVTLKTAV  |
| ELW67147     | LSVPLMDVGETAMVTADSKYCYGPQGS-----RSPY---IPPHAALCLEVTLKTAV |
| XP_005873908 | LSVPLMDVGETAMVTADSKYCYGPQGS-----RSPY---IPPHAALCLEVTLKTAV |
| XP_016066229 | LSIPLMDVGETAMVTADSKYCYGPQGS-----RSPY---IPPHAALCLEVTLKTAV |
| XP_008154611 | LSVPLMDVGETAMVTADSKYCYGPQGS-----RSPY---IPPHAALCLEVTLKTAV |
| XP_020740155 | LSVPLMDVGETAMVTADSKYCYGPQG-----RSPY---IPPHAALCLEVTLKTAV  |
| XP_003982130 | LSVPLMDVGETAMVTADSKYCYGPQGS-----RSPY---IPPHAALCLEVTLKTAV |
| XP_019271924 | LSVPLMDVGETAMVTADSKYCYGPQGS-----RSPY---IPPHAALCLEVTLKTAV |
| XP_007088416 | LSVPLMDVGETAMVTADSKYCYGPQGS-----RSPY---IPPHAALCLEVTLKTAV |
| XP_541935    | LSVPLMDVGETAMVTADSKYCYGPQGS-----RSPY---IPPHAALCLEVTLKTAV |
| XP_012419293 | LSVPLMDVGETAMVTADSKYCYGPQGS-----RSPY---IPPHAALCLEVTLKTAV |
| XP_004688664 | LSVPLMDVGETAMVTADSKYCYGPQGS-----RSPY---IPPHAALCLEVTLKTAV |
| XP_015413208 | LSVPLMDVGETAMVTADSKYCYGPQGS-----RSPY---IPPHAALCLEVTLKTAV |
| XP_006747423 | LSVPLMDVGETAMVTADSKYCYGPQGS-----RSPY---IPPHAALCLEVTLKTAV |
| XP_017905455 | LSVPLMDVGETAMVTADSKYCYGPQGS-----RSPY---IPPHAALCLEVTLKTAV |
| XP_010993437 | LSVPLMDVGETAMVTADSKYCYGPQGS-----RSPY---IPPHAALCLEVTLKTAV |
| XP_006058026 | LSVPLMDVGETAMVTADSKYCYGPQGS-----RSPY---IPPHAALCLEVTLKTAV |
| XP_014921065 | LSVPLMDVGETAMVTADSKYCYGPQGS-----RSPY---IPPHAALCLEVTLKTAV |
| XP_006058024 | LSVPLMDVGETAMVTADSKYCYGPQGS-----RSPY---IPPHAALCLEVTLKTAV |
| XP_001503379 | LSVPLMDVGETAMVTADSKYCYGPQGS-----RSPY---IPPHAALCLEVTLKMAV |
| XP_005972345 | LSVPLMDVGETAMVTADSKYCYGPQGS-----RSPY---IPPHAALCLEVTLKTAV |
| XP_019271926 | LSVPLMDVGETAMVTADSKYCYGPQGS-----RSPY---IPPHAALCLEVTLKTAV |
| XP_006186301 | LSVPLMDVGETAMVTADSKYCYGPQGS-----RSPY---IPPHAALCLEVTLKTAV |
| XP_006199113 | LSVPLMDVGETAMVTADSKYCYGPQGS-----RSPY---IPPHAALCLEVTLKTAV |
| XP_010970465 | LSVPLMDVGETAMVTADSKYCYGPQGS-----RSPY---IPPHAALCLEVTLKTAV |
| XP_003123564 | LSVPLMDVGETAMVTADSKYCYGPQGS-----RSPY---IPPHAALCLEVTLKAAV |
| XP_024416678 | LSVPLMDVGETAMVTADSKYCYGPQGS-----RSPY---IPPHAALCLEVTLKTAV |
| NP_001192650 | LSVPLMDVGETAMVTADSKYCYGPQGS-----RSPY---IPPHAALCLEVTLKTAV |
| XP_020740157 | LSVPLMDVGETAMVTADSKYCYGPQGS-----RSPY---IPPHAALCLEVTLKTAV |
| XP_015344757 | LSVPLMDVGETAMVTADSKYCYGPQGS-----RSPY---IPPHAALCLEVTLKTAV |
| XP_006147177 | LSVPLMDVGETAMVTADSKYCYGPQGS-----RSPY---IPPHAALCLEVTLKTAV |
| XP_020740156 | LSVPLMDVGETAMVTADSKYCYGPQGS-----RSPY---IPPHAALCLEVTLKTAV |

|              |                                                          |
|--------------|----------------------------------------------------------|
| XP_014687058 | LSVPLMDVGETAMVTADSKYCYGPQGS-----RSPY---IPPHAALCLEVTLKMAV |
| XP_004404706 | LSVPLMDVGETAMVTADSKYCYGPQGS-----RSPY---IPPHAALCLEVTLKTAV |
| XP_019819387 | LSVPLMDVGETAMVTADSKYCYGPQGS-----RSPY---IPPHAALCLEVTLKTAV |
| XP_020008573 | LSVPLMDVGETAMVTADSKYCYGPQGS-----RSPY---IPPHAALCLEVTLKTAV |
| XP_007116995 | LSVPLMDVGETAMVTADSKYCYGPQG-----RSPY---IPPHAALCLEVTLKTAV  |
| XP_024622992 | LSVPLMDVGETAMVTADSKYCYGPQG-----RSPY---IPPHAALCLEVTLKTAV  |
| XP_012391225 | LSVPLMDVGETAMVTADSKYCYGPQG-----RSPY---IPPHAALCLEVTLKTAV  |
| XP_020740154 | LSVPLMDVGETAMVTADSKYCYGPQGS-----RSPY---IPPHAALCLEVTLKTAV |
| XP_022414296 | LSVPLMDVGETAMVTADSKYCYGPQG-----RSPY---IPPHAALCLEVTLKTAV  |
| XP_021587090 | LSVPLMDVGETAMVTADSKYCYGPQGS-----RSPY---IPPHAALCLEVTLKTAV |
| XP_019592316 | LSVPLMDVGETAMVTADSKYCYGPQG-----RSPY---IPPHAALCLEVTLKMAV  |
| XP_023989754 | LSVPLMDVGETAMVTADSKYCYGPQGS-----RSPY---IPPHAALCLEVTLKTAV |
| XP_024622991 | LSVPLMDVGETAMVTADSKYCYGPQGS-----RSPY---IPPHAALCLEVTLKTAV |
| XP_004277581 | LSVPLMDVGETAMVTADSKYCYGPQGS-----RSPY---IPPHAALCLEVTLKTAV |
| XP_017651479 | LSVPLMDVGETAMVTADSKYCYGPQG-----RSPY---IPPHAALCLEVTLKTAE  |
| XP_022414295 | LSVPLMDVGETAMVTADSKYCYGPQGS-----RSPY---IPPHAALCLEVTLKTAV |
| XP_017651477 | LSVPLMDVGETAMVTADSKYCYGPQG-----RSPY---IPPHAALCLEVTLKTAE  |
| XP_007461122 | LSVPLMDVGETAMVTADSKYCYGPQGS-----RSPY---IPPHAALCLEVTLKTAV |
| XP_007195521 | LSVPLMDVGETAMVTADSKYCYGPQGS-----RSPY---IPPHAALCLEVTLKAAV |
| XP_019592317 | LSVPLMDVGETAMVTADSKYCYGPQGS-----RSPY---IPPHAALCLEVTLKMAV |
| XP_005001666 | LSVPLMDVGETAMVTADSKYCYGPQG-----RSPY---IPPHAALCLEVTLKTAV  |
| XP_008822765 | LSVPLMDVGETAMVTADSKYCYGPQGS-----RSPY---IPPHAALCLEVTLKTAE |
| XP_017651474 | LSVPLMDVGETAMVTADSKYCYGPQGS-----RSPY---IPPHAALCLEVTLKTAE |
| XP_013002970 | LSVPLMDVGETAMVTADSKYCYGPQGS-----RSPY---IPPHAALCLEVTLKTAV |
| XP_012924198 | LSAPLMDVGETAMVTADSKYCYGPQG-----RSPY---IPPHAALCLEVTLKTAV  |
| EHB02679     | LSAPLMDVGETAMVTADSKYCYGPQGS-----RSPY---IPPHAALCLEVTLKTAV |
| XP_012924197 | LSAPLMDVGETAMVTADSKYCYGPQGS-----RSPY---IPPHAALCLEVTLKTAV |
| XP_021535026 | LSVPLMDVGETAMVTADSKYCYGPQGS-----RSPY---IPPHAALCLEVTLKTAV |
| XP_007943554 | LSVPLMDVGETAMVTADSKYCYGPQG-----RSPY---IPPHAALCLEVTLKTAV  |
| XP_011220551 | LSVPLMDVGETAMVTADSKYCYGPQG-----RSPY---IPPHAALCLEVTLKTAV  |
| XP_008588853 | LSVPLMDVGETAMVTADSKYCYGPQGS-----RSPY---IPPHAALCLEVTLKTAV |
| XP_012916132 | LSVPLMDVGETAMVTADSKYCYGPQG-----RSPY---IPPHAALCLEVTLKTAV  |
| XP_022353384 | LSVPLMDVGETAMVTADSKYCYGPQG-----RSPY---IPPHAALCLEVTLKTAV  |
| XP_008048663 | LSVPLMDVGETAMVTADSKYCYGPQG-----RSPY---IPPHAALCLEVTLKMAV  |
| XP_019652974 | LSVPLMDVGETAMVTADSKYCYGPQGS-----RSPY---IPPHAALCLEVTLKTAV |
| XP_008702161 | LSVPLMDVGETAMVTADSKYCYGPQGS-----RSPY---IPPHAALCLEVTLKTAV |
| XP_019497623 | LSVPLMDVGETAMVTADSKYCYGPQG-----RSPY---IPPHAALCLEVTLKTAV  |
| XP_007943555 | LSVPLMDVGETAMVTADSKYCYGPQGS-----RSPY---IPPHAALCLEVTLKTAV |
| XP_002912777 | LSVPLMDVGETAMVTADSKYCYGPQGS-----RSPY---IPPHAALCLEVTLKTAV |
| EFB19124     | LSVPLMDVGETAMVTADSKYCYGPQGS-----RSPY---IPPHAALCLEVTLKTAV |
| XP_013362739 | LSVPLMDVGETAMVTADSKYCYGPQG-----RSPY---IPPHAALCLEVTLKTAV  |
| XP_006876371 | LSVPLMDVGETAMVTADSKYCYGPQG-----RSPY---IPPHAALCLEVTLKTAV  |
| XP_021493693 | LSVPLMDVGETAMVTADSKYCYGPQG-----RSPY---IPPHAALCLEVTLKTAE  |
| XP_022353383 | LSVPLMDVGETAMVTADSKYCYGPQGS-----RSPY---IPPHAALCLEVTLKTAV |
| NP_001272500 | LSVPLMDVGETAMVTADSKYCYGPQG-----RSPY---IPPHATLCLEVTLKTAV  |
| XP_012916133 | LSVPLMDVGETAMVTADSKYCYGPQGS-----RSPY---IPPHAALCLEVTLKTAV |
| XP_011365085 | LSVPLMEVGETAMVTADSKYCYGPQG-----RSPY---IPPHAALCLEVTLKTAV  |
| XP_006885938 | LSVALMDVGETAMVTADSKYCYGPQG-----RSPY---IPPHAALCLEVTLKTAV  |
| XP_004423006 | LSVPLMDVGETAMVTADSKYCYGPQG-----RSPY---IPPHAALCLEVILKTAV  |
| XP_012413338 | LSVPLMDVGETAMVTADSKYCYGPQG-----RSPY---IPPHAALCLEVTLKTAV  |
| XP_010591524 | LSVPLMDVGETAMVTADSKYCYGPQG-----RSPY---IPPHAALCLEVTLKTAV  |
| XP_008048662 | LSVPLMDVGETAMVTADSKYCYGPQGS-----RSPY---IPPHAALCLEVTLKMAV |
| XP_015987916 | LSVPLMEVGETAMVTADSKYCYGSQG-----RSPY---IPPHAALCLEVTLKTAV  |
| XP_004666075 | LSVPLMDVGETAMVTADSKYCYGPQGS-----PY---IPPHAALCLEVTLKTAV   |
| XP_019497624 | LSVPLMDVGETAMVTADSKYCYGPQGS-----RSPY---IPPHAALCLEVTLKTAV |
| XP_004649071 | LSVPLMDVGETAMVTADSKYCYGPQGS-----RSPY---IPPHAALCLEVTLKTAV |
| APD32922     | LSVPLMDVGETAMVTADSKYCYGPQGS-----RSPY---IPPHAALCLEVTLKTAV |
| XP_013362738 | LSVPLMDVGETAMVTADSKYCYGPQGS-----RSPY---IPPHAALCLEVTLKTAV |

|              |                                                          |
|--------------|----------------------------------------------------------|
| XP_012509480 | LSVPLMDVGETAMVTADSKYCYGPQGS-----RSPY---IPPHAALCLEVTLKTAV |
| NP_034353    | LSVPLMDVGETAMVTADSKYCYGPQG-----RSPY---IPPHAALCLEVTLKTAE  |
| XP_021074830 | LSVPLMDVGETAMVTADSKYCYGPQG-----RSPY---IPPHAALCLEVTLKTAE  |
| XP_006876370 | LSVPLMDVGETAMVTADSKYCYGPQGS-----RSPY---IPPHAALCLEVTLKTAV |
| XP_021493691 | LSVPLMDVGETAMVTADSKYCYGPQGS-----RSPY---IPPHAALCLEVTLKTAE |
| XP_006904374 | LSVPLMEVGETAMVTADSKYCYGPQGS-----RSPY---IPPHAALCLEVTLKTAV |
| XP_006989222 | LSVPLMDVGETAMVTADSKYCYGPQG-----RSPY---IPPHAALCLEVTLKTAE  |
| XP_004423005 | LSVPLMDVGETAMVTADSKYCYGPQGS-----RSPY---IPPHAALCLEVILKTAV |
| XP_006885939 | LSVALMDVGETAMVTADSKYCYGPQGS-----RSPY---IPPNAALCLEVTLKTAV |
| XP_004666073 | LSVPLMDVGETAMVTADSKYCYGPQGS-----RSPY---IPPHAALCLEVTLKTAV |
| ELK19193     | LSVPLMEVGETAMVTADSKYCYGPQGS-----RSPY---IPPHAALCLEVTLKTAV |
| XP_003499206 | LSVPLMDVGETAMVTADSKYCYGSQG-----RSPY---IPPHAALCLEVTLKTAE  |
| XP_014637207 | LSVPLMDVGETAMVTADSKYCYGPQGS-----RSPY---IPPHAALCLEVILKTAV |
| XP_012790031 | LSVPLMDVGETAMVTADSKYCYGPQG-----RSPY---IPPHAALCLEVTLKAAV  |
| XP_003413066 | LSVPLMDVGETAMVTADSKYCYGPQGS-----RSPY---IPPHAALCLEVTLKTAV |
| XP_004384434 | LSVPLMDVGETAMVTADSKYCYGPQGS-----RSPY---IPPHAALCLEVTLKTAV |
| XP_015987917 | LSVPLMEVGETAMVTADSKYCYGSQGS-----RSPY---IPPHAALCLEVTLKTAV |
| XP_021078721 | LSVPLMDVGETAMVTADSKYCYGPQGS-----RSPY---IPPHAALCLEVTLKTAE |
| 5MGX_E       | LSVPLMDVGETAMVTADSKYCYGPQG-----RSPY---IPPHAALCLEVTLKTAV  |
| XP_017168055 | LSVPLMDVGETAMVTADSKYCYGPQG-----RSPY---IPPHAALCLEVTLKTAE  |
| NP_001032257 | LSVPLMHVGETAMVTADSKYCYGPQGS-----RSPY---IPPHAALCLEVTLKTAE |
| XP_004595597 | LSVPLMDVGETAMVTADSKYCYGPQG-----RSPY---IPPHAALCLEVTLKTAV  |
| XP_017529992 | LSVPLMEVGETAMVTADSKYCYGPQG-----RSPY---IPPHAALCLEVTLKTAV  |
| XP_005370624 | LSVPLMDVGETAMVTADSKYCYGPQG-----RSPY---IPPHAALCLEVTLKMAE  |
| NP_001104536 | LSVPLMDVGETAMVTADSKYCYGPQGS-----RSPY---IPPHAALCLEVTLKTAE |
| XP_021074828 | LSVPLMDVGETAMVTADSKYCYGPQGS-----RSPY---IPPHAALCLEVTLKTAE |
| XP_012664880 | LSVPLMDVGETAMVTADSKYCYGPQG-----WSPY---IPPHAALCLEVSLKTAV  |
| XP_006989221 | LSVPLMDVGETAMVTADSKYCYGPQGS-----RSPY---IPPHAALCLEVTLKTAE |
| XP_007635977 | LSVPLMDVGETAMVTADSKYCYGSQGS-----RSPY---IPPHAALCLEVTLKTAE |
| XP_004616706 | LSVPLMDVGETAMVTADSKYCYGPQGS-----RSPY---IPPHAALCLEVTLKAAV |
| XP_012664879 | LSVPLMDVGETAMVTADSKYCYGPQGC-----RSPY---IPPHAALCLEVSLKTAV |
| XP_004705311 | LSVPLMEVGETAMVTADSKYCYGPQG-----RSPY---IPPHAALCLEVTLQTAE  |
| XP_017168054 | LSVPLMDVGETAMVTADSKYCYGPQGS-----RSPY---IPPHAALCLEVTLKTAE |
| XP_021026690 | LSVPLMDVGETAMVTADSKYCYGPQG-----RSPY---IPPHAALCLEVTLKTAE  |
| XP_004595596 | LSVPLMDVGETAMVTADSKYCYGPQGS-----RSPY---IPPHAALCLEVTLKTAV |
| XP_017529990 | LSVPLMEVGETAMVTADSKYCYGPQGS-----RSPY---IPPHAALCLEVTLKTAV |
| XP_005370622 | LSVPLMDVGETAMVTADSKYCYGPQGS-----RSPY---IPPHAALCLEVTLKMAE |
| XP_012883833 | LSVPLMDVGETAMVTADSKYCYGPQG-----RSPY---IPPHAALCLEVTLKSAV  |
| XP_021026691 | LSVPLMDVGETAMVTADSKYCYGPQGS-----RSPY---IPPHAALCLEVTLKTAE |
| XP_010849455 | FSVPLMDVGETAMVTADSKYCYGPQGS-----RSPY---IPPHAALCLEVTLKTAV |
| XP_010604777 | LSVPLMDVGETAMVTADAKYCYGPQGX-----XXXY---IPPHAALCLEVTLKTAV |
| XP_004705310 | LSVPLMEVGETAMVTADSKYCYGPQGS-----RSPY---IPPHAALCLEVTLQTAE |
| XP_021026689 | LSVPLMDVGETAMVTADSKYCYGPQGS-----RSPY---IPPHAALCLEVTLKTAE |
| XP_005898381 | LSVPLMDVGETAMVTADSKYCYGPQGS-----RSPY---IPPHAALCLEVTLKTAV |
| XP_012883832 | LSVPLMDVGETAMVTADSKYCYGPQGS-----RSPY---IPPHAALCLEVTLKSAV |
| XP_024622994 | LSVPLMDVGETAMVTADSKYCYGPQG-----RSPY---IPPHAALCLEVTLKTAV  |
| XP_022414294 | LSVPLMDVGETAMVTADSKYCYGPQG-----RSPY---IPPHAALCLEVTLKTAV  |
| XP_007116996 | LSVPLMDVGETAMVTADSKYCYGPQGS-----RSPY---IPPHAALCLEVTLKTAV |
| XP_024622993 | LSVPLMDVGETAMVTADSKYCYGPQGS-----RSPY---IPPHAALCLEVTLKTAV |
| XP_022414293 | LSVPLMDVGETAMVTADSKYCYGPQGS-----RSPY---IPPHAALCLEVTLKTAV |
| XP_023055022 | LSVPLMDVGETAMVTADSKYCYGPQGS-----RSPY---IPPHAALCLEVTLKTAV |
| ELR54589     | LSVPLMDVGETAMVTADSKYCYGPQGS-----RSPY---IPPHAALCLEVTLKTAV |
| XP_010845609 | LSVPLMDVGETAMVTADSKYCYGPQGS-----RSPY---IPPHAALCLEVTLKTAV |
| XP_021538869 | LSVPLMDVGETAMVTADSKYCYGPQGS-----RSPY---IPPHAALCLEVTLKTAV |
| KFO22602     | LSVPLMDVGETAMVTADAKYCYGPQG-----SGD---AP---GLVAVVTLKTAV   |
| 2MF9_A       | LSVPLMDVGETAMVTADSKYCYGPQGS-----RSPY---IPPHAALCLEVTLKTAV |
| PNI50452     | LSVPLMDVGETAMVTADSKYCYGPQGS-----RSPY---IPPHAALCLEVTLKTA- |
| PNJ28404     | LSVPLMDVGETAMVTADSKYCYGPQGS-----RSPY---IPPHAALCLEVTLKTA- |



|              |                                                          |
|--------------|----------------------------------------------------------|
| XP_007533227 | LSIPLMDVGESAMVTADSKYCYGPQGS-----RSPC---VPPDAALCLEVTLLAAA |
| XP_020864537 | LSVQLMNVGETALIIADAKYCYGPHG-----RSPT---IPPNSTLRLEVALQTAA  |
| XP_012397649 | LSVQLMNVGETALIIADAKYCYGSCG-----RSPA---IPPNSTLRLEVALQSAV  |
| XP_001369403 | LSVQLMNVGETALIIADAKYCYGSHG-----RSPT---IPPNSTLRLEVALQTAV  |
| 2F2D_A       | LSVPLMDVGETAMVTADSKYCYGPQG-----RSPY---IPPHAALCLEVTLKTAV  |
| 2D9F_A       | LSVPLMDVGETAMVTADSKYCYGPQGS-----RSPY---IPPHAALCLEVTLKTAV |
| XP_015668943 | LCVQLMDMGETALITSDGKYCFGPQG-----RSPD---IPPNAFLTLEVELLAAQ  |
| 2AWG_A       | LSVPLMDVGETAMVTADSKYCYGPQG-----RSPY---IPPHAALCLEVTLKTAV  |
| XP_015668942 | LCVQLMDMGETALITSDGKYCFGPQGS-----RSPD---IPPNAFLTLEVELLAAQ |
| XP_025032464 | LCVQLMDMGETALITSDGKYCFGPQG-----RSPD---IPPDASLTLEVELLAAQ  |
| XP_007443923 | LCVQLMDMGETALITSDGKYCFGPQG-----RSPD---IPPDASLTLEVELLAAQ  |
| KFV73372     | LCVQLLEMGETALIMSDAKYCYGPQG-----RSPD---IPPNAALTLEVELLEAR  |
| OXB56359     | LCVQLMEMGETALIMSDAKYCYGAQG-----RSPD---VPPNAALTLEVELLEAR  |
| XP_009675861 | LCVQLLEMGETALIMSDAKYCYGPQG-----RSPD---IPPNAALTLEVELLEAR  |
| OXB73131     | LCVQLMEMGETALIMSDAKYCYGAQG-----RSPD---VPPNAALTLEVELLEAR  |
| XP_010723402 | LCVQLMEMGETALIMSDAKYCYGVQG-----RSPD---IPPNAALTLEVELLEAQ  |
| KFV67807     | LCVQLLEMGETALIQSDAKYCYGLQG-----RSPD---IPPNAALTLEVELLAAR  |
| XP_010304001 | LCVQLLEMGETALIVSDAKYCYGSQG-----RSPD---IPPDAAALTLEVELLAAQ |
| NP_001241668 | LCVQLMEMGETALIMSDAKYCYGAQG-----RSPD---IPPNAALTLEVELLEAR  |
| KF003599     | LCVQLLEMGETALIVSDAKYCYGSQG-----RSPD---IPPDAAALTLEVELLAAQ |
| XP_021234495 | LCVQLMEMGETALIMSDAKYCYGAQG-----RSPD---IPPNAALTLEVELLEAQ  |
| POI29828     | LCVQLMEKGETALIMSDAKYCYGAQG-----RSPD---IPPNAALTLEVELLEAQ  |
| XP_021234496 | LCVQLMEMGETALIMSDAKYCYGAQG-----RSPD---IPPNAALTLEVELLEAQ  |
| XP_023963943 | LCVQLMEMGETASILSDAKYCYGPQG-----RSPD---IPPHAALTLEVQLLAVQ  |
| XP_014793985 | LCVQLLEMGETALIVSDAKYCYGAQG-----RSPD---IPPNAALTLEVELLKAQ  |
| XP_009899401 | LCVQLLEMGETALIQSDAKYCYGLQG-----RSPD---IPPNAALTLEVELLAAR  |
| XP_015742210 | LCVQLMEMRETALITSDAKYCYGAQG-----RSPD---IPPNAALTLEVELLEAR  |
| XP_009641057 | LCVQLLEMGETALIVSDAKYCYGAQG-----RSPD---IPPNAALTLEVELLSAR  |
| KFP19261     | LCVQLLEMGETALIVSDAKYCYGAQG-----RSPD---IPPNAALTLEVELLSAR  |
| XP_024065593 | LCVQLMEMGETASILSDAKYCYGPQG-----RSPD---IPPHAALTLEVQLLAVQ  |
| XP_011594878 | LCVQLLEMGETALIVADAKYCYGAQG-----RSPD---IPPNAALTLEVELLAAQ  |
| XP_014742726 | LCVQLLEMGETALIVSDAKYCYGAQG-----RSPD---IPPNAALTLEVELLAAR  |
| XP_015742208 | LCVQLMEMRETALITSDAKYCYGAQG-----RSPD---IPPNAALTLEVELLEAR  |
| XP_019369180 | LCTQLLETGETASILSDAKYCYGPQG-----RSPD---IPPNAALALEVELLAVQ  |
| XP_010561556 | LCVQLLEMGETALIVADAKYCYGAQG-----RSPD---IPPNAALTLEVELLAAQ  |
| XP_008638175 | LCVQLLEMGETALIVSEAKYCYGAQG-----RSPD---IPPNASLTLEVELLAAR  |
| XP_002195923 | LCVQLLEMGETALIMSEAKYCYGAQG-----RSPD---IPPNAALTLEVELLAAR  |
| XP_015266773 | LCVQLMEMGETALIQSDPKYCHGSQG-----RSSD---IPPDAAALTLEVELLAAR |
| XP_005505599 | LCVQLLEMGETALIVSDAKYCYGAQG-----RSPD---IPPNATLTLEVELLAAQ  |
| XP_014115778 | LCVQLLEMGETALIVSEAKYCYGAQG-----RSPD---IPPNASLTLEVELLAAR  |
| XP_014742725 | LCVQLLEMGETALIVSDAKYCYGAQG-----RSPD---IPPNASLTLEVELLAAR  |
| XP_018780521 | LCVQLLEMGETALIVSDAKYCYGAQG-----RSPD---VPPNASLSLEVELLAAR  |
| XP_005235043 | LCVQLLEMGETALIVSDAKYCYGAQG-----RSPD---IPPNAALTLEVELLAAR  |
| OPJ86694     | LCVQLLEIGETALIVSDAKYCYGAQG-----RSPD---IPPNATLTLEVELLAAQ  |
| XP_019341692 | LCTQLLEMGETALITSDAKYCYGPQG-----RSPG---IPPNTALTLEVELLAVQ  |
| XP_021400798 | LCVQLLEMGETALIVSEAKYCYGAQG-----RSPD---IPPNASLRLEVELLAAR  |
| XP_006028906 | LCTQLLEMGETASITSDAKYCYGPQG-----RSPG---IPPNAALTLEVELLAVQ  |
| KFQ97904     | LCVQLLEMGETALIVSDAKYCYGAQG-----RSPD---VPPNAALTLEVELLAAR  |
| XP_015507158 | LCVQLLEMGETALIVSEAKYCYGAQG-----RSPD---IPPNASLTLEVELLAAR  |
| KFW12711     | LCVQLLEMGETALIVSDAKYCYGVQG-----RSPD---VPPNASLTLEVELLEAR  |
| XP_006271082 | LCTQLLEMGETALITSDAKYCYGPQG-----RSPG---IPPNTALTLEVELLAVQ  |
| KF081655     | LCVQLLEMGETALIVSDAKYCYGTQG-----RSPD---IPPNAALTLEVELLAAQ  |
| XP_007072098 | LCAQLLEMGETALIMSDAKYCFGPQG-----RSPD---IPPHAALTLEVQLLAVQ  |
| XP_020669929 | LCVQLMEMGETAMILSDAKYCYGPQG-----RSPD---VPPDASLAFEVLLSAR   |
| XP_009464539 | LCVQLLEMGETALIVSDAKYCYGAQG-----RSPD---VPPNAALTLEVELLAAR  |
| XP_010158039 | LCVQLLEMGETALIVSDAKYCYGVQG-----RSPD---VPPNASLTLEVELLEAR  |
| XP_019149030 | LCVQLLEMGETALIVSEAKYCYGAQG-----RSPD---IPPNASLTLEVELLAAR  |
| XP_020669930 | LCVQLMEMGETAMILSDAKYCYGPQG-----RSPD---VPPDASLAFEVLLSAR   |

|              |                                                           |
|--------------|-----------------------------------------------------------|
| XP_019393900 | LCTQLLETGEMASIVSDAKYCYGPQG-----RSPD---IPPNAALTLEVELLAVQ   |
| EMP24085     | LCAQLLEMGETALIMSDAKYCFGPQG-----RSPD---IPPHAALTLEVQLLAVQ   |
| XP_009566597 | LCVQLLEMGETALIVSDAKYCYGTQG-----RSPD---IPPNAALTLEVELLAAQ   |
| KFW65305     | LCVQLLEMGETALIMSDAKYCYGAQG-----RRPD---VPPNAALALEVELLGAR   |
| XP_015507157 | LCVQLLEMGETALIVSEAKYCYGAQG-----RSPD---IPPNASLTLEVELLAAR   |
| XP_013799130 | LCVQLLEMGETALIVSDAKYCYGSQG-----RSPD---IPPNAALTLEVELLEAR   |
| XP_014433658 | LCAQLLEMGETALIVSDAKYCYGPQG-----RTPD---IPPHATLTLEVELLAAQ   |
| XP_009319696 | LCVQLLEMGETALIMSDAKYCYGAQG-----RRPD---VPPNAALALEVELLGAR   |
| KFQ36923     | LCVQLLEMGETALIVSDAKYCYGAQG-----RSPD---VPPNAALTLEVELLAAQ   |
| XP_005060257 | LCVQLLEMGETALIVSDAKYCYGAQG-----RSPD---IPPNASLTLEVELLAAQ   |
| KFU87694     | LCVQLLEMGETALIMSDAKYCYGAQG-----RSPD---VPPNAALTLEVELLAAQ   |
| XP_005139681 | LCVQLLEMGETALIVSDAKYCYGAQG-----RSPD---IPPNAALTLEVELLEAR   |
| XP_009993397 | LCVQLLEMGETALIMSDAKYCYGAQG-----RSPD---VPPNAALTLEVELLAAQ   |
| AAH84415     | LCVQLMEVGETSLIASDAKYCYGKEG-----RSPD---IPPNSNLNLEVTLDDVQ   |
| KQL50954     | LCVQLLEVGETALIVSDAKYCYGAQG-----RSPD---IPPNAALTLEVELLEAR   |
| NP_001088346 | LCVQLMEVGETSLIASDAKYCYGKEG-----RSPD---IPPNSNLNLEVTLDDVQ   |
| XP_013913386 | LCVQLMDMGETALITSDGNYCFGPLG-----RIPD---IPPCASLTLEVELLTAQ   |
| KFQ13009     | LCVQLLEMGETALIVSDAKYCYGVQG-----RSPD---VPPNAAITLEVELLVAR   |
| KFQ75436     | LCVQLLEMGETALIVSDAKYCYGTQG-----RSPD---VPPNAALTLEVELLAAR   |
| KFP56346     | LCVQLLEMGETALIVSDAKYCYGSQG-----RSPD---VPPNAALTLEVELLAAR   |
| KFM07869     | LCVQLLEMGETALIMSDAKYCYGAQG-----RSPD---VPPNAALTLEVELLGAR   |
| XP_018096952 | LCVQLMEEGETSLIASDAKYCYGKEG-----RSPD---IPPNSNLNLEVTLVVQ    |
| KFP65829     | LCVQLLEMRETALIVSDAKYCYGAQG-----RSPD---IPPNAALTLEVELLAAR   |
| XP_023803625 | LCVQLLEMGETALIVSEAKYCYGAQG-----RSPD---IPPNASLTLEVELLAAR   |
| XP_009951725 | LCVQLLEMGETALIVSDAKYCYGVQG-----RSPD---VPPNAAITLEVELLVAR   |
| NP_001120570 | LCVQLMEAEETSLIASDAKYCYGKEG-----RSPD---IPPNSNLNLEVALLDVQ   |
| KFP23912     | LCVQLLEMGETALIVSDAKYCYGVQG-----RSPD---VPPNAALTLEVELLAAR   |
| XP_010073720 | LCVQLLELGETALIVSDAKYCYGAQG-----RSPD---IPPNAALTLEVELLAAR   |
| KGL86304     | LCVQLLEMGETALIVSDAKYCYGAQG-----RSPD---VPPNAALTLEVELLAAR   |
| KFV08597     | LCVQLLELGETALIVSDAKYCYGAQG-----RSPD---IPPNAALTLEVELLAAR   |
| KFW76752     | LCVQLLEMGETALIVSDAKYCYGAQG-----RSPD---IPPNASLTLEVELLAAR   |
| XP_009700019 | LCVQLLEMRETALIVSDAKYCYGAQG-----RSPD---IPPNAALTLEVELLAAR   |
| XP_010208130 | LCVQLLEMGETALIVSDAKYCYGVQG-----RSPD---VPPNAALTLEVELLAAR   |
| KFQ81502     | LCVQLLEMGETALIVSDAKYCYGAQG-----RSPD---IPPNAALTLEVELLAAQ   |
| XP_017938939 | LCVQLLEMGETALIVSDAKYCYGAQG-----RSPD---IPPNASLTLEVELLAAR   |
| KFP70760     | LCVQLLEMKETALIVSDAKYCYGAQG-----RSPD---IPPNTSLTLEVELLAAR   |
| XP_009880959 | LCVQLLEMGETALIVSDAKYCYGAQG-----RSPD---VPPNAALTLEVELLAAR   |
| XP_010292010 | LCVQLLEMGETALIVSDAKYCYGAQG-----RSPD---IPPNAALTLEVELLAAQ   |
| XP_009076312 | LCVQLLEMKETALIVSDAKYCYGAQG-----RSPD---IPPNTSLTLEVELLAAR   |
| XP_018412986 | LCVQLMELGETALIEADAKYCYGKQG-----RDPD---IPPNADLLLEVSLLEVQ   |
| XP_022525503 | LTVQLMEIGEALVEAGSKYAYGALGS-----STPA---VPPHADLILEIQLLSAA   |
| XP_021459512 | LTVQLMEMGETALVQADAKYAYGALGS-----LAPE---VLPSADLALLEVQLLDAT |
| XP_021459510 | LTVQLMEMGETALVQADAKYAYGALGS-----LAPE---VLPSADLALLEVQLLDAT |
| XP_024277334 | LTVQLMEMGETALVQADAKYAYGALGS-----LAPE---VLPSADLALLEVQLLDAT |
| XP_024277330 | LTVQLMEMGETALVQADAKYAYGALGS-----LAPE---VLPSADLALLEVQLLDAT |
| XP_024277333 | LTVQLMEMGETALVQADAKYAYGALGS-----LAPE---VLPSADLALLEVQLLDAT |
| XP_009512288 | LCVQLLEMGETALIVSDAKYCYGAQG-----RSPD---IPPNASLTLEVELLAAQ   |
| XP_020354512 | LTVQLMEMGETALVQADAKYAYGALGS-----LAPE---VLPSADLALLEVQLLDAT |
| KFZ50883     | LCVQLLEMGETALIVSDAKYCYGVQG-----RSPD---IPPNAALTLEVELLVAK   |
| KFW81721     | LCVQLLEMGETALIVSDAKYCYGAQG-----RSPD---IPPNASLTLEVELLAAQ   |
| CDQ57258     | LTVQLMEMGETALVQADAKYAYGALGS-----LAPE---VLPSADLALLEVQLLDAT |
| XP_020354513 | LTVQLMEMGETALVQADAKYAYGALGS-----LAPE---VLPSADLALLEVQLLDAT |
| XP_020487811 | LSVQLMEKGEKALIQTDAKYAYGARGS-----YEPE---IPPNAPLCLEVELKEAT  |
| XP_024277331 | LTVQLMEMGETALVQADAKYAYGALGS-----LAPE---VLPSADLALLEVQLLDAT |
| XP_014071869 | LTVQLMEMGEKALVQADAKYAYGALGS-----LAPE---VLPSADLALLEVQLLDAT |
| XP_011472153 | LTVQLMEMGEKALIQSDPKYAYGDRGS-----LEPR---VPPNAQLSLEVELLEAT  |
| XP_014071870 | LTVQLMEMGEKALVQADAKYAYGALGS-----LAPE---VLPSADLALLEVQLLDAT |
| XP_024114895 | LTVQLMEMGEKAEIQADAKYAYGDRGS-----LEPA---VPPNATLSLEVELLEAT  |

|              |                                                             |
|--------------|-------------------------------------------------------------|
| XP_024114896 | LTVQLMEMGEKAEIQADAKYAYGDRGS-----LEPA---VPPNATLSLEVELLEAT    |
| ETE64390     | LCVQLMDMGETALITSDGKYCFGPOG-----RYMR---KWTEAGLLARVELLTAQ     |
| XP_023809890 | LTVQLMEMGEKALIQSDPKYAYGDRGS-----LEPR---VPPNAQLSLEVELLEAT    |
| XP_008499209 | LCVQLLEMGETALIVSDPKYCYGAQG-----RSPD---IPP NATLTLEVELLGAR    |
| KFP06384     | LCVQLLEMGETALIVSDPKYCYGAQG-----RSPD---IPP NATLTLEVELLGAR    |
| XP_023859426 | LIVQLMEMGEKALVQADAKYAYGALGS-----LAPE---VLPNADLALLEVQLLDAT   |
| XP_023859424 | LIVQLMEMGEKALVQADAKYAYGALGS-----LAPE---VLPNADLALLEVQLLDAT   |
| XP_023859423 | LIVQLMEMGEKALVQADAKYAYGALGS-----LAPE---VLPNADLALLEVQLLDAT   |
| XP_021454666 | LTVQLMEMREKALVQANAKYAYGALGS-----LAPD---VPPNAALALEVQLLDAT    |
| XP_017572299 | LTVQLMEMGEKALVEAGAKYAYGALGS-----STPA---VPPDADLIMEVQLLSAA    |
| CDQ97962     | LTVQLMEMREKALVQANAKYAYGALGS-----LAPD---VPPNAALALEVQLLDAT    |
| XP_023854736 | LTVQLMEMREKALVQANAKYAYGSLGS-----LVPE---VPPNAELALEVQLLDAT    |
| XP_018920592 | LTVQMMEMGEKALIEAGAKYAYGALGS-----STPA---VPPDADLMLEVQLLSAD    |
| NP_001133417 | LTVQLMEMREKALVQANAKYAYGALGS-----LAPE---VPPNAELALEVQLLDAT    |
| XP_023854735 | LTVQLMEMREKALVQANAKYAYGSLGS-----LVPE---VPPNAELALEVQLLDAT    |
| XP_024258320 | LTVQLMEMREKALVQANAKYAYGALGS-----LAPD---VPPNAELALEVQLLDAT    |
| AAI52651     | LTVQLMEMGEKALIEAAAKYAYGALGS-----SAPA---VPPDADLLLEVQLLSAD    |
| XP_020348060 | LTVQLMEMREKALVQANAKYAYGALGS-----LVPD---VPPNAELALEVQLLDAT    |
| NP_957178    | LTVQLMEMGEKALIEAAAKYAYGALGS-----SAPA---VPPDADLLLEVQLLSAD    |
| XP_005932512 | LTVQLMAMGEEALIQTDAKYAYGARGSG-----LEPA---VPANAELSLEVKKLEAT   |
| XP_013860095 | LTVQLMEIEEKALIH TD AKYAYGVRGS-----LDPE---IPPNASLSLEVELLEAT  |
| PWA20923     | LTVQLMEMGEKALIH TD AKYAYGARGSG-----LEPE---VPPNAQLSLEVELVKAT |
| XP_005727139 | LTVQLMALGEEALIQTD AKYAYGARGSG-----LEPA---VPANAELSLEVKKLEAT  |
| XP_006790401 | LTVQLMAMGEEALIQTD AKYAYGARGSG-----LEPA---VPANAELSLEVKKLEAT  |
| XP_019207270 | LTVQLMAMGEEALIQTD AKYAYGARGSG-----LEPA---VPANAELSLEVKKLEAT  |
| XP_024654530 | LTVQLMALGEEALIQTD AKYAYGARGSG-----LEPA---VPANAELSLEVKKLEAT  |
| XP_007897075 | LCVQLMELDETAQIIISDSKYAYGTRGS-----TQPA---IPPSARLHMEVQLVDVE   |
| XP_010870009 | LSVQLMEMGEKALVQADAKYAYGTLES-----LSPP---VPPSADLSLEVQLLDAT    |
| XP_022615368 | LTVQLMEMGEKALIQTD AKYAYGTRGS-----LEPE---VPPNTELSLEVDDLLEAT  |
| XP_010870008 | LSVQLMEMGEKALVQADAKYAYGTLES-----LSPP---VPPSADLSLEVQLLDAT    |
| XP_005795669 | LTVQLMEMGEKALIH TD AKYAYGARGSG-----LEPE---VPPNAQLSLEVELVKAT |
| XP_020391166 | LCVQLMDQNEVALIVSDAKYAYGSLGS-----SEPS---VPSNATVHLEVQLLSVG    |
| AWP11099     | LTVQLMEMGEKALIQTD AKYAYGTRGS-----LDPE---VPPDAELSLEVELLGAT   |
| XP_017333233 | LTVQLMEMGEKALIEASAKYAYGALGSN-----STPV---VPPNADLILEVHLLSAV   |
| KTF74275     | LTVQLMEMGEKALIEAGAKYTYGALGS-----STPA---VPPDADLILEVQLLSAE    |
| XP_017262938 | LTVQLMEMGEKALVQTD AKYAYGARGSG-----LDPE---VPPNAALSLEVELLEAT  |
| XP_023263872 | LTVQLMEMGEKALIQTD AKYAYGTRGS-----LEPE---VPPNAELSLEVDDLLEAT  |
| XP_020391165 | LCVQLMDQNEVALIVSDAKYAYGSLGS-----SEPS---VPSNATVHLEVQLLSVG    |
| XP_016327233 | LTVQLMEMGEKALIEAGAKYAYGALGS-----STPA---APPDSDLILEVQLLSAD    |
| XP_016138463 | LTVQLMEMGEKALIEAGAKYAYGALGS-----STPA---APPDSDLILEVQLLSAD    |
| XP_016356127 | LTVQLMEMSEKALIEAGAKYAYGALGS-----STPA---VPPDADLILEVQLLSAE    |
| XP_007577281 | LTVQLMEMGEKALIH TD AKYAYGARGSG-----LEPE---IPPNAQLSLEVELVGAT |
| XP_008405333 | LTVQLMEMGEKALIH TD AKYAYGVRGS-----LEPD---IPPNAQLSLEVELVGAT  |
| XP_012715520 | LTVQLMEMGEKALIH TD AKYAYGARGSG-----LDPE---VPPNAQLSLEVELLEAT |
| XP_012695070 | LAVQLMEMGEKALVEADAKYAYGSVGS-----ACPP---VVPNSNLTMEVQLLTAL    |
| XP_020795782 | LTVQLMELGERALVLTDAKYAYGSQGS-----FDPK---VPPNAELSLEVELLEV T   |
| XP_016382508 | LTVQLMEMSEKALIEAGAKYAYGALGS-----STPA---VPPDADLILEVQLLSAE    |
| XP_018522913 | LTVQLMEKGEKALIQTD AKYAYGTRGS-----LEPE---VPPSAELSLEVELLEAT   |
| XP_008305299 | LTVQLMEMGEKALIH TD AIYAYSSFGS-----QDPA---IPPDAELSLEVELLEAK  |
| XP_015238114 | LTVQLMEMGEKALIH TD AKYAYGARGSG-----LEPE---VPPNAQLSLEVELLKAA |
| XP_018583793 | LTVLLMEMDERALVQTD AKYAYGALGS-----TPA---VPPDASLILELKLLEAV    |
| XP_016886204 | LTVQLMEMGEKALIH TD AIYAYSSFGS-----QDPA---IPPDAELSLEVELLEAK  |
| XP_019752339 | LAVLLMEMGEKALVQTAAIYAYGTWGS-----CDPD---VPPNAELSLEVELKKVC    |
| XP_010728467 | LTVQLMEMGEKALVQTD AKYAYGARGSG-----LEPE---VPPNAELSLEVELLEAT  |
| KKF19855     | LTVQLMEMGEKALVQTD AKYAYGARGSG-----LEPE---VPPNAELSLEVELLEAT  |
| XP_015827013 | LTVQLMEIGEKALIQTD AKYAYGVRGS-----LDPD---IPPNAELSLEVELLEAT   |
| XP_022061518 | LTVQLMEMREKALIQTD AKYAYGARGSG-----LEPE---VSPNAELSLEVELLEAT  |
| XP_019936960 | LTVQLMEMGEKALIH TD AKYAYGTRGS-----LEPK---VPPNAELCLEVELLEAT  |

|              |                                                           |
|--------------|-----------------------------------------------------------|
| XP_003974097 | LTVQLMEMGEKASIQTDAKYAYGELGS-----SEPQ---VPPNTDLHLEIKLLEAT  |
| XP_023699813 | LTVLLMEMNEKAIVHTDAKYAYGGLGS-----TAPA---VPPTSPLILELQLEAT   |
| XP_023699812 | LTVLLMEMNEKAIVHTDAKYAYGGLGS-----TAPA---VPPTSPLILELQLEAT   |
| XP_020478047 | LTVQLMEMEEKVLIQTDAKYAFGARGS-----LEPV---VPPNAPLSLEVELLEAT  |
| XP_015220721 | LAVQLMELEEKALIYSDAKYAYGTLGNE-----SDPA---APPAAALSLEVQLEAS  |
| XP_023123034 | LTVQLMEMREKALIQTDAKYAYGARGS-----LEPE---VSPNAELSLEVELLEAT  |
| XP_020478046 | LTVQLMEMEEKVLIQTDAKYAFGARGS-----LEPV---VPPNAPLSLEVELLEAT  |
| XP_020478045 | LTVQLMEMEEKVLIQTDAKYAFGARGS-----LEPV---VPPNAPLSLEVELLEAT  |
| XP_008275730 | LTVQLMEMKEKALIQTDAKYAYGARGS-----LEPE---VPPNAELSLEVELLEAT  |
| XP_010770232 | LTVMMLMEMGEKALVQANAKYAYGERGS-----LEPE---VPANEELSLEVELLEAS |
| XP_002601637 | LCVSLMGMGETCEVIVDALYAYGSTGRE-----PD---IPENATITYELQLLNAQ   |
| XP_019619553 | LCVSLMGMGETCEVIVDALYAYGALGRE-----PD---IPENATITYELQLLNAE   |
| XP_006814126 | LAVAVMEMGEVCTLLSDSRFTYGDLG-----REPD---IPGGAKLRFELLELLAVD  |
| XP_006629043 | LCAPSMQLDEIALLITDSQYAYGQRG-----REPD---IPPGAALLYQLHLLHIR   |
| PVD20167     | LTVALMNFGEKAEVTSSSRFAYGKHG-----REPD---IPADADVHFTLELLDVQ   |
| XP_023841292 | ECAIAMQQDEITLLLADSQYTYGLLG-----REPD---IPAWAPLLYQLQLLNIR   |
| XP_008410571 | ECVMSMQKGEITLLLADSQYAYGLLG-----REPD---IPAWAPLLYQLQLLDIR   |
| XP_008410568 | ECVMSMQKGEITLLLADSQYAYGLLG-----REPD---IPAWAPLLYQLQLLDIR   |
| XP_022329628 | LAVALMEEGQVIELQTDARFAYGEKGRK-----PD---IPPNSSISYIIELVKKE   |
| XP_014897626 | ECVMSMQKGEITLLLADSQYAYGLLG-----REPD---IPAWAPLLYQLQLLDIR   |
| XP_014848641 | ECVMSMQKGEITLLLADSQYAYGLLG-----REPD---IPAWAPLLYQLQLLDIR   |
| XP_014848639 | ECVMSMQKGEITLLLADSQYAYGLLG-----REPD---IPAWAPLLYQLQLLDIR   |
| XP_007566466 | ECVMSMQKGEITLLLADSQYAYGLLG-----REPD---IPAWAPLLYQLQLLDIR   |
| XP_023180976 | ECVMSMQKGEITLLVADSQYAYGLLG-----REPD---IPAWAPLLYQLQLLDIR   |
| KMQ91381     | LAIALMDVGEVAEIVDPRFAYGKHGK-----RP-IPPDATIIYTVELKTSE       |
| XP_007566465 | ECVMSMQKGEITLLLADSQYAYGLLG-----REPD---IPAWAPLLYQLQLLDIR   |
| XP_014897625 | ECVMSMQKGEITLLLADSQYAYGLLG-----REPD---IPAWAPLLYQLQLLDIR   |
| XP_015254615 | ECVMSMQKGEITLLLADSQYAYGLLG-----REPE---IPAWAPLLYQLQLLDIR   |
| XP_005798327 | ECVMSMQKGEITLLVADSQYAYGLLG-----REPD---IPAWAPLLYQLQLLDIR   |
| XP_015254612 | ECVMSMQKGEITLLLADSQYAYGLLG-----REPE---IPAWAPLLYQLQLLDIR   |
| XP_013980328 | ECAIAMQQDEITLLLADSQYTYGLLG-----REPD---IPAWAPLLYQLQLLNIR   |
| XP_009061784 | LGVSLMEIGETCELFASKFAYGERGRE-----PD---IPLNSDITYTLELLKYE    |
| XP_022106769 | LCLSLMDLGEVSI IKTSRPFAYGETGRA-----PD---VPPNAEVTYELELLNVQ  |
| XP_020625955 | LALALTELDEVCELVTDARYAYGKTGKPD---ANPP---IPPDAKLTYEIQLLAVR  |
| XP_020625956 | LALALTELDEVCELVTDARYAYGKTGKPD---ANPP---IPPDAKLTYEIQLLAVR  |
| XP_010732628 | ECVIAMQQGEITLLLADSQYAYGLLG-----REPD---IPAWAPLLYQLQLLDIR   |
| XP_015728921 | LGVPTMRTGEVCFFLAASPYGYGPAG-----REPD---VPPEAPLLFEVTLLDAR   |
| XP_003440659 | ECVMSMQKGEITLLLTDSQYAYGLLG-----REPD---IPAWAPLLYQLQLLDFR   |
| XP_014004032 | ECAIAMQQDEIALLLADSQYTYGLLG-----RETD---IPAWAPLLYQLQLLDIR   |
| XP_010899928 | ECVLTMQKDEIVLLLADSQYTYGLLG-----REPD---IPAWAPLLYQLQLEIR    |
| XP_020336380 | ECAIAMQQGEIALLLADSQYTYGLLG-----RETD---IPAWAPLLYQLQLLDIR   |
| XP_022330049 | LAVALMEEGQVIELQTDARFAYGEKGRK-----PD---IPPNSSISYIIELVKKE   |
| PIK48936     | LTSILMEVGEKAVIIAAPRFAYGEEGRE-----PD---VPPNSLVRYELELLEVK   |
| XP_020336379 | ECAIAMQQGEIALLLADSQYTYGLLG-----RETD---IPAWAPLLYQLQLLDIR   |
| XP_022330048 | LAVALMEEGQVIELQTDARFAYGEKGRK-----PD---IPPNSSISYIIELVKKE   |
| XP_007907980 | LCAYSMELNEIALVISDGKYAYGHLG-----RAPD---IRADATVVYEVQLLKVR   |
| XP_013859000 | ECVMSMQKGEIALLLADSQYAYQLLG-----REPD---IPAWAPLLYQLQLLDVR   |
| XP_019737313 | ECVSMRRGEIALLLADSRAYGPAG-----REPD---IPAGAPLLYQLQLLDVS     |
| XP_021427237 | ECAMAMQQDEITLLLADSQYTYGLLG-----REPD---IPAWAPLLYQLQLLNIR   |
| XP_023827235 | ECAIAMQQDEIALLLADSQYTYGLLG-----RETD---IPAWAPLLYQLQLLDIR   |
| XP_023827230 | ECAIAMQQDEIALLLADSQYTYGLLG-----RETD---IPAWAPLLYQLQLLDIR   |
| XP_008309233 | ECVLSMQQGEITLLLADSQYAYGLLG-----REPD---VPAWSPLLYQLQLLDVR   |
| XP_024269308 | ECAIAMQQDEIALLLADSQYTYGLLG-----RETD---IPAWAPLLYQLQLLDIR   |
| XP_002932306 | LGVRTMQLGEVAFLLTNSLYAFGLLG-----RDPD---IPSDASLLYKVTLQVR    |
| XP_022785584 | IGISLMELDEVCELVTDARYAYGKAGKPD---AKPP---IPPDAKITYEIQLLSVR  |
| XP_008309234 | ECVLSMQQGEITLLLADSQYAYGLLG-----REPD---VPAWSPLLYQLQLLDVR   |
| XP_013386268 | LALSLMERGEVAEIVTDARFAYGSMG-----RDPD---IPPNAQLTYEVELVRIE   |
| XP_005928731 | ECVMSMQKGEITLLLTDSQYAYGLLG-----REPD---IPAWAPLLYQLQLLDFR   |

|              |                                                          |
|--------------|----------------------------------------------------------|
| XP_002119960 | MTISLMELGEKSEITSDAKYCYG--DEG----KPPN---IEPGMDLCFTVILLNID |
| XP_024235293 | ECAIAMQQDEITLLLADSQYTYGLLG-----REPD---IPAWAPLLYQLQLLNIR  |
| XP_005729996 | ECVMSMQKEITLLLTDSQYAYGLLG-----REPD---IPAWAPLLYQLQLLDFR   |
| XP_018619414 | HCAASMCLWEIALLLADSQYTYGHQG-----RDPD---IPAWSPLLYELQLLDIR  |
| XP_012796312 | LSVPLAEHKEIFELTTDSRFAYGSRG-----RDS---IPSGAKLTYRIEVLKVD   |
| XP_004553258 | ECVMSMQKEITLLLTDSQYAYGLLG-----REPD---IPAWAPLLYQLQLLDFR   |
| CDQ72337     | ECAISMQQDEIALLLADSQYTYGLLG-----RETD---IPAWAPLLYQLQLLDIR  |
| XP_024269303 | ECAIAMQQDEIALLLADSQYTYGLLG-----RETD---IPAWAPLLYQLQLLDIR  |
| XP_024269307 | ECAIAMQQDEIALLLADSQYTYGLLG-----RETD---IPAWAPLLYQLQLLDIR  |
| XP_024269300 | ECAIAMQQDEIALLLADSQYTYGLLG-----RETD---IPAWAPLLYQLQLLDIR  |
| XP_017893134 | LAIALMDVEEIAEIVDPRFAYGSLGD-----EPNIPASSTITYTVELKSSE      |
| XP_021454564 | ECAISMQQDEIALLLADSQYTYGLLG-----RETD---IPAWAPLLYQLQLLDIR  |
| XP_003967095 | ECVMSMQMGEVSLLLADSQYAYGLLG-----REPD---VPAWAPLLYQLQLLDFR  |
| XP_021454548 | ECAISMQQDEIALLLADSQYTYGLLG-----RETD---IPAWAPLLYQLQLLDIR  |
| XP_023697743 | RCAVSMHPPEISLLLLTNSQYAYGRQG-----RDPD---VPAWASLLYEVQLLGFR |
| PIK51124     | LAAILMEVGEKAEIIAIPRFAYGEQGRE-----PD---VPPNSIVRYEELLEVEK  |
| XP_020311464 | ECAIAMQQDEITLLLADSQYTYGLLG-----REPD---IPAWAPLLYQLQLLNIR  |
| XP_017261735 | ECVMSMQKEIALLLADSQYAYELLG-----REPD---IPAWAPLLYQLQLLDVR   |
| XP_011312767 | LAVALMDVGEVAQIEISPRFAYGDLGK-----KPDIPPGATLHYNITLKAVE     |
| XP_022047038 | ECVMSMQKEITLLLADSQYAYGLLG-----REPD---IPAWAPLLYQLQLLDIR   |
| XP_003427294 | LAVALMDLEEEAEVETASRFAYGSLGRKA---TASLPEIPPDAKITYNIVLKSIE  |
| XP_020139363 | FVLHMLR-GVPRERDSANPHSWP--GP-----VPPHGYSENKKTV----        |
| XP_011661975 | LCVCLMELGEVAEIHNTNARFAYGEYGKA-----PK---ILPNTDMIYEVELLETN |
| XP_021263191 | LGVPTMRGGEICFFLAASPYGYGRAG-----REPD---VPPEAPLVFEVTLLEVR  |
| XP_005110253 | LAVALMDVGEKCELFTDARYAYGPLGRD-----PD---IPKDasITYTIELINVQ  |
| OCT89685     | LGVRTMQLGEVAFLLTNSLYAFGLLG-----RDPD---IPSDASLLYKVTLQCVR  |
| XP_018106932 | LGVRTMQLGEVAFLLTNSLYAFGLLG-----RDPD---IPSDASLLYKVTLQCVR  |
| XP_022609905 | ECVISMQKEITLLLADSQYAYGLLG-----REPD---IPAWAPLLYQLQLLDIR   |
| XP_023278137 | ECVISMQKEITLLLADSQYAYGLLG-----REPD---IPAWAPLLYQLQLLDIR   |
| XP_023151164 | ECVMSMQKEITLLLADSQYAYGLLG-----REPD---IPAWTPLYQLQLLDIR    |
| OON20683     | LSLPLAERDERFELITDARFAYGSLG-----RDPD---IPGDATLRYEVHLLSSS  |
| XP_014340350 | LCTLSMHPGEVSLITNARFAYGHQG-----RDPD---VPADAPLLYEVQLLCVR   |
| XP_012284026 | LAIALMDVGEVATIEVHSRFAYGDLGK-----EPNIPSNATIIYNVELKSVG     |
| OAD61952     | LAIALMNVNEVAEIEVDPRFAYGSLGK-----EPNIPPNTTILYTVELKSSK     |
| XP_023962949 | LGVQSMQLGEVSFLLTSFLYAYGHLG-----RDPD---IPSDASLLYEVTLQIR   |
| XP_008121023 | LAVPSMQVGEVALFLVSPTCAYGSLG-----REPD---IPPNATLLYEVTLQVQ   |
| XP_017763036 | LAIALMNVNEVAEIEVDPRFAYGSLGK-----EPNIPPNTTILYTVELKSSK     |
| XP_017691650 | LGVPTMQPGEISFFLAACPYAYGRP-----REPD---VPPEAPLLFEVTLLEVR   |
| XP_012710521 | ECVMSMQKEIALLLTDSQYAYGLLG-----REPD---IPAWAPLLYQLQLLDIR   |
| XP_015819997 | ECVMSMKKEIALLLADSQYGYGLLG-----REPD---IPAWAPVLYQLQLLDTR   |
| XP_023962948 | LGVQSMQLGEVSFLLTSFLYAYGHLG-----RDPD---IPSDASLLYEVTLQIR   |
| XP_019921720 | LAVALMEEGQVIELQTDARFAYGEKGRK-----PD---IPPNSSIAYIIELVKKD  |
| XP_020904887 | VGVALIELSEVCELVTDARYAYGEQGRSG---DNP---VPPNAKITYEIELLAVR  |
| XP_024138547 | ECVLSMQMGEITLLLADSQYAYGLLG-----REPD---IPAWAPILYQLQLQDIR  |
| AWP08482     | ECVMSMQKEITLLLADSRAYGLLG-----REPD---IPAWAPLLYQLQLLGIR    |
| CDQ67637     | ECAMAMQQDEITLLLADSQYTYGLLG-----REPD---IPAWAPLLYQLQLLNIR  |
| XP_011423840 | LAVALMEEGQVIELQTDARFAYGEKGRK-----PD---IPPNSSIAYIIELVKKD  |
| XP_014808190 | LGVPTMQPGEVSFFLAAPFYGYGRP-----REPD---VPPEAPLLFEVTLLEVR   |
| XP_007059625 | LGVQSMQLGEVSFLLTSFYAYGHLG-----RDPD---IPSDASLLYEVTLQIR    |
| XP_024138546 | ECVLSMQMGEITLLLADSQYAYGLLG-----REPD---IPAWAPILYQLQLQDIR  |
| EMP36068     | LGVQSMQLGEVSFLLTSFYAYGHLG-----RDPD---IPSDASLLYEVTLQIR    |
| XP_024138543 | ECVLSMQMGEITLLLADSQYAYGLLG-----REPD---IPAWAPILYQLQLQDIR  |
| OXU31097     | LAVALMDLEEEAEVETASRFAYGSLGRKA---TASFPEIRPDAKITYNIVLKSIE  |
| XP_022202921 | FAIPLMDVDEEAELVVGPRFAFGARGRQ-----PDVPPGATLHYTVTLSSAD     |
| XP_006557516 | LAIALMDVNEIAEIEVDPRFAYGSLGK-----EPNIPSNATILYTVELKSSE     |
| XP_016770764 | LAIALMDVNEIAEIEVDPRFAYGSLGK-----EPNIPSNATILYTVELKSSE     |
| XP_006615021 | LAIALMDVNEIAEIEVDPRFAYGSLGK-----EPNIPSNATILYTVELKSSE     |
| XP_008546855 | LALALMDVGEVAEIEIARFGYGDVGR-----QPEIPAGAKLFYNVELKSVE      |

XP\_006557515 LAIALMDVNEIAEIEVDPRFAYGSLGK-----EPNIPSNATILYTVELKSSE  
XP\_007254541 ECAISMKKKEEIALLLADSQYTYGLLG-----RDPD---IPPWTPILYQLQLVEIR  
XP\_006615020 LAIALMDVNEIAEIEVDPRFAYGSLGK-----EPNIPSNATILYTVELKSSE  
XP\_006557514 LAIALMDVNEIAEIEVDPRFAYGSLGK-----EPNIPSNATILYTVELKSSE  
XP\_011053698 LTIVLMELGEIAEIKIDPRFAYGTRGE-----GSIPPNATITYTVELKTIE  
XP\_007254540 ECAISMKKKEEIALLLADSQYTYGLLG-----RDPD---IPPWTPILYQLQLVEIR  
XP\_006615019 LAIALMDVNEIAEIEVDPRFAYGSLGK-----EPNIPSNATILYTVELKSSE  
XP\_016913411 LAIALMDVNEIAEIEVDPRFAYGSLGK-----EPNIPSNATILYTVELKSSE  
XP\_017559733 ECAISMKKKEEIALLLADSQYTYGLLG-----REPD---IPAWTPILYQLQLIEIR  
PKU40687 LGVPTMQPGEVSFFLAAPFYGYGHPG-----REPD---VPPEAPLLFEVTLLEVR  
XP\_016913410 LAIALMDVNEIAEIEVDPRFAYGSLGK-----EPNIPSNATILYTVELKSSE  
EGI65888 LTIVLMELGEIAEIKIDPRFAYGTRGE-----GSIPPNATITYTVELKTIE  
XP\_014252350 FALALMDKGEAEVVIASRFAYGSLG-----RKPD---IPDAVLTYRLTLHNVR  
XP\_012165944 LAIALMDVNEVAEIEIDPRFAYGSLGK-----EPNIPPNATILYTVELKSSE  
XP\_016913409 LAIALMDVNEIAEIEVDPRFAYGSLGK-----EPNIPSNATILYTVELKSSE  
XP\_011053696 LTIVLMELGEIAEIKIDPRFAYGTRGE-----GSIPPNATITYTVELKTIE  
XP\_019934661 ECVMSMQRGEITLLLADSLEYAGLLG-----REPD---IPAWTPILYQLQLDIR  
XP\_008304064 ECVMSMQKGEITLLLADSQYAYGLLG-----REPD---IPAWAPLLYQLQLDIR  
XP\_011053695 LTIVLMELGEIAEIKIDPRFAYGTRGE-----GSIPPNATITYTVELKTIE  
CAX74525 LSIPLAEHKETFELITDARFAYGSRG-----RDPD---IPSGAKLTYHIEILKVD  
XP\_023811597 ECVLSMQMGEITLLLADSQYAYGLLG-----REPD---IPAWAPTLYQLQLDIR  
EFZ15418 LTIILMELDEITQILVHPRFAYGSQK-----ESIPPNNATITYTVELKMIE  
OPJ70235 LGVPTMQPGEVAFFLAAPFYGYGHPG-----REPD---VPPEAPLLFEVTLLEVR  
AAX27902 LSIPLAEHKETFELITDARFAYGSRG-----RDPD---IPSGAKLTYHIEILKVD  
XP\_011053694 LTIVLMELGEIAEIKIDPRFAYGTRGE-----GSIPPNATITYTVELKTIE  
XP\_011164040 LTIILMELDEITQILVHPRFAYGSQK-----ESIPPNNATITYTVELKMIE  
XP\_011150605 LAIAMMDVNEIAVIEVDPRFAYGILGQ-----RPDIPPDATIEYTVELKTVD  
EFN77170 LAIAMMDVNEIAVIEVDPRFAYGILGQ-----RPDIPPDATIEYTVELKTVD  
XP\_011164039 LTIILMELDEITQILVHPRFAYGSQK-----ESIPPNNATITYTVELKMIE  
AAH90698 ECAITMKKKEEIALLLADSQYTYGLLG-----REPD---IPAWAPLLYQLQLDFR  
XP\_014606393 LAIALMNVGETAVVEVASRFAYGTLGV-----EPDIPPNATIWTYTVELKSVE  
XP\_003700328 LAIALMDTDEVAEIEVNPRFAYGKLGK-----EPNIPSDATILYTVELKSVE  
XP\_683608 ECAITMKKKEEIALLLADSQYTYGLLG-----REPD---IPAWAPLLYQLQLDFR  
XP\_014606392 LAIALMNVGETAVVEVASRFAYGTLGV-----EPDIPPNATIWTYTVELKSVE  
XP\_023726255 LALPLMDVGEVALLEVGPFRFAYGSQGRE-----PDIPCDVTVMYTVELLSSE  
XP\_011404052 IVASLMQRGEICCVKANPKYAYGSQG-----RSPN---VPPESPVMYELELLEVL  
XP\_018337850 LTIVLMELGEIAEIKIDPRFAYGTRGE-----ESIPPNATITYTVELKAIE  
XP\_023726263 LALPLMDVGEVALLEVGPFRFAYGSQGRE-----PDIPCDVTVMYTVELLSSE  
XP\_012689022 ECAISMKEEIALLLADSQYTYGLLG-----REPD---IQAWAPILYQLQLDFR  
XP\_015190182 LAIALMNVGEIAVVEVASRFAYGTLGV-----EPDIPPNATIWTYTVELKSVE  
XP\_024943519 LAIALMNIGEIAEVEVGPRFGYGDIGN-----KPNIPGGAKIFYTVELKAIE  
XP\_015437909 LAIALMDTGEIAEIEINPRFAYGHLGK-----PPSIPPAIILYTVELISTE  
KYN13005 LTIVLMELGEIAEIKIDPRFAYGTRGE-----GSIPPNATITYTVELKAIE  
XP\_024943518 LAIALMNIGEIAEVEVGPRFGYGDIGN-----KPNIPGGAKIFYTVELKAIE  
XP\_012526171 LTIILMELNEIAEILIHPRFAYGPHGN-----KSIPPDSTITYTVHLKAIE  
XP\_012237396 LAIALMDVNEVAEIEIDPRFAYGSLGK-----EPNIPPNATILYTVELKSSE  
XP\_018372055 LTIVLMELGEIAEIKIDPRFAYGTRGE-----GSIPPNATITYTVELKAIE  
XP\_015600846 LAIALMNIGEIAEVEVGPRFGYGDIGN-----KPNIPGGAKIFYTVELKAIE  
XP\_018372054 LTIVLMELGEIAEIKIDPRFAYGTRGE-----GSIPPNATITYTVELKAIE  
XP\_023811598 ECVLSMQMGEITLLLADSQYAYGLLG-----REPD---IPAWAPTLYQLQLDIR  
XP\_013086934 LAAALMEQGEKCELRDADAKYAYGSLGRE-----PD---IPKDSKLIYILELLHVQ  
XP\_012340112 LAIALMDVNEIAEIEVDPRFAYGSLGK-----EPNIPSNATILYTVELKSSE  
XP\_012064601 LTIVLMELGEIAEIKINPRFAYGTRGE-----GSVPPNATITYTVELKAIE  
XP\_021933338 LALPLMDVGEVALLEIGPRFAYGALGRE-----PDVPRDATVYTVELLSAD  
XP\_020469449 ECVMSMQEGELTLLLTHSQYAYGHLG-----REPD---IPAWAPLLYHLQLDIR  
XP\_012340111 LAIALMDVNEIAEIEVDPRFAYGSLGK-----EPNIPSNATILYTVELKSSE  
XP\_014772499 IAVALMELNEVAELKCDAKYAYGSQGRF-----PD---VPSNTAIVYTVLELLDKE  
XP\_021933337 LALPLMDVGEVALLEIGPRFAYGALGRE-----PDVPRDATVYTVELLSAD

|              |                   |                         |                       |         |                   |                  |      |       |
|--------------|-------------------|-------------------------|-----------------------|---------|-------------------|------------------|------|-------|
| XP_002425448 | LAVPLMNVGEEAIVVVS | PRFGYGSVGNL-----        | PKIPP                 | NATITYE | VTLVNVL           |                  |      |       |
| XP_018053112 | LTIVLMELGEIAEIKIN | PRFAYGTRGE-----         | GSVPP                 | NATITYI | VELKAIE           |                  |      |       |
| XP_023811595 | ECVLSMQMGEITLL    | LADSQYAYGLLG-----       | REPD---               | IPAWAPT | LYQLQLLDIR        |                  |      |       |
| XP_003692338 | LAIALMDVNEIAEIE   | VDPRFAYGSLGK-----       | EPNIP                 | SNATILY | TVELKSSE          |                  |      |       |
| KQK73886     | LGVPTMQPGEVAF     | FLAAPPYGYGRPG-----      | REPD---               | VPPEAP  | LLFEVTLLEVR       |                  |      |       |
| XP_021933339 | LALPLMDVGEVALL    | EIGPRFAYGALGRE-----     | PDVPR                 | DATV    | VYTVELLSAD        |                  |      |       |
| XP_018025482 | LVVPLMDRGESE      | EVYIHSRFAYGSKGDG-----   | ERVPA                 | DASLL   | CTVKLLDYK         |                  |      |       |
| XP_019335449 | LGVPSMQLGEVS      | FFLASFYAYGRLG-----      | REPD---               | IPADALL | LYEVTLLLAR        |                  |      |       |
| XP_014772498 | IAVALMELNEVAEL    | KCDAKYAYGSQGRF-----     | PD----                | VPSNTA  | IVYTTLELLDKE      |                  |      |       |
| XP_023811594 | ECVLSMQMGEITLL    | LADSQYAYGLLG-----       | REPD---               | IPAWAPT | LYQLQLLDIR        |                  |      |       |
| XP_001846585 | MTLKLMMNVGERAE    | IVDARFAYGDQGYKNEDHPE--- | RSVPP                 | NAKIT   | YTYTVELVSSK       |                  |      |       |
| XP_014470017 | LAVALMDVHEVAE     | IEIDPRFAYS              | SKLGK-----            | KPDIPP  | DAVMSYTVELKD      |                  |      |       |
| XP_002111046 | LIVVPLMNVGETV     | CVFANSRYGYAQYGS-----    | SKHN---               | VPQDAD  | LEFEVTLIDVS       |                  |      |       |
| XP_014772494 | IAVALMELNEVAEL    | KCDAKYAYGSQGRF-----     | PD----                | VPSNTA  | IVYTTLELLDKE      |                  |      |       |
| KZS20178     | LIVALMDCGEISQ     | VEVAPRFAYGSLGNG-----    | KDIPP                 | DATILY  | TIELLEIS          |                  |      |       |
| XP_014470016 | LAVALMDVHEVAE     | IEIDPRFAYS              | SKLGK-----            | KPDIPP  | DAVMSYTVELKD      |                  |      |       |
| KFM75734     | LVICLMEKGEKAR     | VVIPS                   | KLAYGEIG-----         | RTPD--- | VPPNSDIKCDLELKEVE |                  |      |       |
| XP_018900271 | FVIALMDVGEVAF     | EVFVGPRFGFGKIGRQEP----- | DKPEV                 | PPNANL  | HYTMKLIKVE        |                  |      |       |
| XP_020392992 | LCVPLMYIHETAL     | ILTDSKFC                | SGRASS-----           | EASE--- | VKPGSRLLELVHLLSAS |                  |      |       |
| XP_016376789 | ECTISMKQGEIA      | LLALLADSQYTYGHLG-----   | REPD---               | IPAWAP  | LLYQLQLLDFR       |                  |      |       |
| XP_016345079 | ECAISM            | TQGEIA                  | LLALLADSQYTYGHLG----- | REPD--- | IPAWAP            | LLYQLQLLDFR      |      |       |
| XP_014106477 | LGVPTMQPGEVS      | FFLAAPPYAYGRPG-----     | REPD---               | VPPEAP  | LLFEVTLLEVR       |                  |      |       |
| XP_014237957 | LALALMNT          | EEEEAEVKV               | GYGKTGR-----          | TSPLP   | VI                | PNTDLVYNVTLLKSVT |      |       |
| XP_016376788 | ECTISMKQGEIA      | LLALLADSQYTYGHLG-----   | REPD---               | IPAWAP  | LLYQLQLLDFR       |                  |      |       |
| XP_016376787 | ECTISMKQGEIA      | LLALLADSQYTYGHLG-----   | REPD---               | IPAWAP  | LLYQLQLLDFR       |                  |      |       |
| CDS28193     | LALPFVELMED       | FELVTDARFAYGSKG-----    | NPPN---               | IPNAKL  | TYRISLIACN        |                  |      |       |
| KOC65132     | LAIALMDVGEVAF     | IEVNP                   | RFAYGSLGK-----        | EPNIPP  | NACILYTVELKSSQ    |                  |      |       |
| XP_017790334 | LAIALMDVGEVAF     | IEVNP                   | RFAYGSLGK-----        | EPNIPP  | NACILYTVELKSSQ    |                  |      |       |
| XP_020790728 | ECVLSMQTGEIA      | LLALLADSQYAYGLLG-----   | RQPD---               | IPAWAP  | LLYQLQLCDVR       |                  |      |       |
| XP_012221110 | LTISLMDKDEIAE     | VYVDP                   | PRFGYGDQPE-----       | EKIPP   | NSVLKYI           | VELKEII          |      |       |
| GAA30660     | LSLPLAERDER       | FELVTDARFAYGSLG-----    | RDPD---               | IPGDAT  | LRYEVHLLSSS       |                  |      |       |
| XP_012221101 | LTISLMDKDEIAE     | VYVDP                   | PRFGYGDQPE-----       | EKIPP   | NSVLKYI           | VELKEII          |      |       |
| XP_012221093 | LTISLMDKDEIAE     | VYVDP                   | PRFGYGDQPE-----       | EKIPP   | NSVLKYI           | VELKEII          |      |       |
| XP_018649440 | LSIPLAEHKEI       | FEMTTDSRFAYGSRG-----    | RDPG---               | IPSGAK  | LYRIEVLKVD        |                  |      |       |
| EFX68474     | LIVALMDCHEISQ     | VEVGPRFAYGSLGNG-----    | KDIPPE                | ATILY   | TIELLEVS          |                  |      |       |
| XP_023229640 | LTVTLMEKGE        | LAEVIIIPARLAYGEQG-----  | KLPE---               | IPPNSV  | INYKIRLV          | DVR              |      |       |
| EAT32833     | MALKLMNVGEQAE     | IVIVSSRFAYGEQGLK        | NEDHPE---             | RTVPP   | NEKIT             | YTYTVELVSTK      |      |       |
| XP_016344167 | ECTISMKQGEIA      | LLALLADSQYTYGHLG-----   | REPD---               | IPAWAP  | LLYQLQLLDFR       |                  |      |       |
| XP_016344168 | ECTISMKQGEIA      | LLALLADSQYTYGHLG-----   | REPD---               | IPAWAP  | LLYQLQLLDFR       |                  |      |       |
| XP_016344166 | ECTISMKQGEIA      | LLALLADSQYTYGHLG-----   | REPD---               | IPAWAP  | LLYQLQLLDFR       |                  |      |       |
| XP_016376234 | ECAISM            | MQGEIA                  | LLALLADSQYTYGHLG----- | REPD--- | IPAWAP            | LLYQLQLLDFR      |      |       |
| XP_007906811 | ICVPLMEVEETSL     | ILADV                   | KFCYLSKEC-----        | QNGS--- | LPPGT             | KLLLEVKLLSVT     |      |       |
| KYN04145     | LTISLMELDEIAE     | IKIDPRFAYGTRGE-----     | GAVPP                 | NATITYI | VELKAIE           |                  |      |       |
| XP_014282311 | FALALMDKGEVAF     | EIKITPRFGYGS            | LGR-----              | PEIPP   | GANLIY            | TVTL             | LDVK |       |
| XP_015109871 | LAIALMDVGEAAE     | IVIA                    | PRFAYGDIGK-----       | EPDIPP  | PGATLY            | NNVNLKAVK        |      |       |
| CDS42647     | LALPLAELKEV       | FELKTDARFAYGDMG-----    | KMPD---               | IPGAK   | LYTHITLNECG       |                  |      |       |
| XP_011870270 | LAIVLMELGEIAE     | IVINERFAYGMSGT-----     | STIPSL                | ATV     | TYVVELKAIE        |                  |      |       |
| XP_011870269 | LAIVLMELGEIAE     | IVINERFAYGMSGT-----     | STIPSL                | ATV     | TYVVELKAIE        |                  |      |       |
| XP_018977514 | ECVISMTKGEIA      | LLALLADSQYTYGHLG-----   | REPD---               | IPAWAP  | LLYQLELLDFR       |                  |      |       |
| XP_007906810 | ICVPLMEVEETSL     | ILADV                   | KFCYLSKEC-----        | QNGS--- | LPPGT             | KLLLEVKLLSVT     |      |       |
| CDS17605     | LALPLAELKEV       | FELKTDARFAYGDMG-----    | KMPD---               | IPGAK   | LYTHITLNECG       |                  |      |       |
| XP_014206998 | LALALMETEEEE      | AIIEAEARFGYGS           | LGRPA----             | VGPFP   | PEIP              | SNAKLIY          | NVT  | LKRVG |
| XP_018393954 | LTISLMELDEIAE     | IKIDPRFAYGTRGE-----     | GAVPP                 | NATITYI | VELKAIE           |                  |      |       |
| XP_015929100 | LVFCLMEKDEV       | AKVKIPPKLAYGKLG-----    | RSPE---               | IPPESE  | LEYEVHLKD         | VQ               |      |       |
| ELU06040     | LCVALADEHET       | FELFTAAQYAYGAFGKP-----  | DSG---                | IPPNSD  | IIEIAVLKVE        |                  |      |       |
| XP_024353326 | LALPLAELKEV       | FELKTDARFAYGDMG-----    | KMPD---               | IPGAK   | LYTHITLNECG       |                  |      |       |
| EAT35561     | MALKLMNVGEQAE     | IVIVSSRFAYGEQGLK        | NEDHPE---             | RTVPP   | NEKIT             | YTYTVELVSTK      |      |       |
| XP_018359770 | LTIPLMELGEIAE     | IRIDPRFSY               | GTHGE-----            | GSVPP   | NATITYT           | VELKAIK          |      |       |

|              |                                                           |
|--------------|-----------------------------------------------------------|
| EAT35560     | MALKLMNVGEQAEVIVSSRFAYGEQGLKNEHPE---RTVPPNEKITYTVELVSTK   |
| XP_018319727 | VVLALMNVGETSKIKIEPRLAYGSRGLE-----SKIPPNATILYEVTLLSAD      |
| XP_001662371 | MALKLMNVGEQAEVIVSSRFAYGEQGLKNEHPE---RTVPPNEKITYTVELVSTK   |
| XP_018319726 | VVLALMNVGETSKIKIEPRLAYGSRGLE-----SKIPPNATILYEVTLLSAD      |
| XP_001662370 | MALKLMNVGEQAEVIVSSRFAYGEQGLKNEHPE---RTVPPNEKITYTVELVSTK   |
| XP_012269548 | LVIALMDVGEVAEVEVESRFAYGDLGR-----EPDIPGGAKLFYTTLELLSVE     |
| PAA92621     | IAVLLMELDEQCSLVTSARYAYGYSAEV----KTSTGVVIPPGLSVLHCTVTLVSVD |
| XP_019867812 | FCIGIMNVGEQSMVKVAPLFAYGDKGLS-----EXIPGKATLIFNIELKALK      |
| PAA53270     | IAVLLMELDEQCSLVTSARYAYGYSAEV----KTSTGVVIPPGLSVLHCTVTLVSVD |
| PAA57938     | IAVLLMELDEQCSLVTSARYAYGYSAEV----KTSTGVVIPPGLSVLHCTVTLVSVD |
| XP_966821    | VAIGLMNVGEKCSLKIEPRLAFFGGVGLP-----PKIPPNAVVDIELVGVE       |
| KXJ84517     | MALKLMNVGEQAEVIVAARFAYGELGLKDEHPE---RTVPPNEKITYTVDLVSTK   |
| XP_023345477 | LILPLMRVGETCRIESESACFYGEQG-----DGDR---VPGNHKLYLEVELISAR   |
| XP_011494478 | LGITLMDLEEEAELEICPRFAYGALGR-----NLPLPEIPPNSKLTYNVILKDIK   |
| XP_023345475 | LILPLMRVGETCRIESESACFYGEQG-----DGDR---VPGNHKLYLEVELISAR   |
| XP_016940923 | MVVPMMQIGEVAQVSVDPRFGYGSVGLK---KDGESEYLVPPDSHLYEIELLDIK   |
| XP_023345476 | LILPLMRVGETCRIESESACFYGEQG-----DGDR---VPGNHKLYLEVELISAR   |
| PNF41144     | LALPLMDVGEVALLEVGRFAYGSQGRE-----PDIPCDVTVMYTVELLSSSE      |
| XP_019932587 | MALKLMNVGEQAEVIVAARFAYGELGLKDEHPE---RTVPPNEKITYTVELVSTK   |
| XP_019932586 | MALKLMNVGEQAEVIVAARFAYGELGLKDEHPE---RTVPPNEKITYTVELVSTK   |
| XP_016028426 | MVLPMQLQVGEVSQVSVDPRFGYGSIGLK---KEGESEYLVPPDANLYEIELLDIK  |
| XP_016958803 | MVVPMMQIGEVAQVSVDPRFGYGSIGLK---KDGESEYLVPPDSHLYEIELLDIK   |
| EKC18274     | LAVALMEEGQVIELQTDARFAYGEKGRK-----PD---IPPNSSAIYIELLVKDD   |
| PNF41145     | LALPLMDVGEVALLEVGRFAYGSQGRE-----PDIPCDVTVMYTVELLSSSE      |
| XP_011636531 | LTIVLMDLGEIAEIIHPRFAYGACGN-----DPIPPNATITYTVELKAIE        |
| XP_017014991 | MVVPMLQVGEVAQVSVDPRFGYGSIGLK---KDGEDYLVPPDSHLYEIELLDIK    |
| XP_001974711 | MVLPMQLQVGEVAQVSVDPRFGYGSIGLK---KDGESEYLVPPDSHLYEIELLDIK  |
| XP_024874265 | LTIVLMELGEIAVVVVDPFRFAYGTRGT-----ASIPSNATITYTVELKEIK      |
| NP_611353    | MVLPMQLQVGEVSQVSVDPRFGYGSIGLK---KEGESEYLVPPDAHLYEIELLDIK  |
| XP_016984960 | MVVPMLQVGEVAQVSVDPRFGYGSIGLK---KDGEDYLVPPDSHLYEIELLDVK    |
| XP_017054378 | MVVPMLQVGEVAQVSVDPRFGYGSIGLK---KEGESEYLVPPDSHLYEIELLDIK   |
| XP_024874264 | LTIVLMELGEIAVVVVDPFRFAYGTRGT-----ASIPSNATITYTVELKEIK      |
| XP_019545364 | IALKLMNVGEQAEVIVAARFAYGELGLKDEHPE---RTVPPNEKITYTVELVSTK   |
| XP_019545363 | IALKLMNVGEQAEVIVAARFAYGELGLKDEHPE---RTVPPNEKITYTVELVSTK   |
| XP_014670901 | MAVTLMELEETCELKINARFAYGERGRL-----PD---IPSNATVITYQLSLGIY   |
| XP_017079421 | MVVPMLRIGEVAQVSVDPRFGYGSIGLK---KDGETDYLVPDPSHLYEIELLDIK   |
| XP_013113222 | MTIPLMDIGEVAEVQVDARFAYGSLGLK---NDTDELSIPPESKLYEVHLKDAI    |
| XP_002034480 | MVLPMQLQVGEVSQVSVDPRFGYGSIGLK---KEGESEYLVPPDANLYEIELLDIK  |
| XP_017031858 | MVLPMMLVGEVSQVSVDPRFGYGSIGLK---REGSEFVVPDPSNLYEIELLDSK    |
| XP_015788695 | LIVPLMNVGEIAEVIVTPRFAYGEKG-----REPD---IPPNASLKLIIEIAID    |
| XP_017117238 | MVVPMMQVGEVAQVSVDPRFGYGSIGLK---KDGESEYLVPPDSHLYEIELLDIK   |
| XP_015364528 | LALSMLNVGEIAELKIASRFGYGEKGLS-----PKVLGGARLVYTVELVTVK      |
| XP_017836078 | MVLPMMHVGEVSEISVDARFYGAIGLK---KDNSTDVLIPPEAHLSEYIELLEVK   |
| XP_316645    | MALKLMNEGEVAEVIVNPRFAYGELGVKDPTEQDPVIRTVPPNATITYTVELVSMR  |
| XP_002091890 | MVLPMQLQVGEVAQVSVDPRFGYGSIGLK---KDGESTYLVPPDSHLYEIELLDTK  |
| XP_009022869 | LCVPLMHPGEVCELVTARFAYGEKGRK-----PD---IPGNARITYELELLDVQ    |
| XP_020815089 | MVLPMMLVGEVSQVSVDPRFGYGSIGLK---REGDSEFVVPDPSNLYEIELLDSK   |
| KYO18601     | LGVPMSQLGEVSFFLASFYAYGRLG-----REPD---IPADALLYEPEAG---     |
| XP_023307145 | MVVPMLNIGEVAEVKVDPRFAYGSLGLK---NDKEPALSIPPEATITYEVHLIDSK  |
| XP_004526322 | MVIPLMNVGEVAEVTIDARFAYGSIGMK---NNENECASIPPDITLYEVHLVESK   |
| XP_017468465 | MAIPLMSVGEVAEIRIDTRFAYGSLGFK---NENNESASVPADANLYEVHLLDSK   |
| XP_011213061 | MVIPLMNVGEVAEVTIDARFAYGSLGLK---NDENENASVPADSTLIYEVHLQDCK  |
| ETN59059     | MALKLMNEGEQAEVVVNPRFAYGEIGLNNETDPK---RSVPPNATITYTVELLSTK  |
| XP_019877780 | VAVALMNLNERCLLKIAPRLAYGQKGLP-----GKVPENATVVYDIELTAVE      |
| XP_001951673 | LALSMLNVGEIAELKIASRFGYGEKGLN-----PKVLGGARLVYTVELVTVK      |
| XP_002062976 | MVLPMMQVGEVAQVSVDPRFAYGSTGLKIN-KDDDETVVVPDPSHLYEIELLDAK   |
| XP_001986816 | MVLPMMHVGEVAEVTVDQRFYGTAGLK---TDNPPEIVIPPNAQLIYELELVVK    |
| XP_022181773 | LALSMLNVGEIAELKIASRFGYGEKGLS-----PKVLGGARLVYIVELVSVK      |



|              |                                                           |
|--------------|-----------------------------------------------------------|
| XP_002048800 | MVLPMMHVGEVSQVNVDQRFYGTIGLK---TENPPEIIVPPNANLVYQVELVDVK   |
| XP_018801327 | MVIPLMNVGEIAEVTIDARFAYGSLGLK---NDENENANVPADSTLIYEVHLQDCK  |
| XP_020300622 | LALALMDVGEIALVYVHPRFAYGEQGT-----EDIPPNSIITYIIEELKKIT      |
| XP_011193416 | MVIPLMNIGEVAEVSVDSEFAYGSLGLK---NEKDDSANVPADSTLYEVHLLDCK   |
| XP_017960399 | MVLPMMHVGEVAQVSIDQRFYGTIGLK---TENPPETVIPPANANLIYELELVDVQ  |
| ACO13176     | YILPIMNVNEVVEVITESDFMYGDQGL-----DSPP---VPPKATLQLKLHLIDSV  |
| XP_011350211 | LVIVLMNIGEVADVIVEPRFAYGLSGT-----KDIPAGTPLVYTVELLTAR       |
| KRT81327     | IVIGLMNIGDIWELEIEPRLAYGTKGLP-----PLIPADAKVLYRV-----       |
| XP_023162735 | MVLPMMHVGEVAQVSIDQRFYGTIGLK---TENPPETVIPPNTNLIYELELVDVK   |
| XP_019771996 | VALGLMNSSERCLKIGPRLAFGDRGLP-----PKIPAGATVLFDELVDVSHQ      |
| XP_005176045 | MVVPLMNVGEVAEVKVDPRFAYGSLGLK---NDADPELNIPPDSEKLYEVHLLDTK  |
| XP_014095636 | MVIPLMNIGEVAEVTIDARFAYGSLGLK---NDENESASVPADSTLIYEVHLLNCK  |
| XP_017867395 | MVLPMMHVGEVAQVSIDQRFYGTIGLK---TENPPETVIPPANANLIYELELVDVK  |
| XP_002004550 | MVLPMMHVGEVAQVSIDQRFYGTIGLK---TENPPETVIPPANANLIYELELVDVK  |
| XP_022921247 | LSIAMMNVGEICELKIQPRLAFGAKGLP-----PLIPPNTTVIYEVALLSIV      |
| XP_002015767 | MILPMLKVGEVAEVVVDPRFGYGTGLGLK---KD-DGDFIVPPNALLTYEIELLDSK |
| XP_001360319 | MILPMLKVGEVAEVVVDPRFGYGTGLGLK---KD-DGDFIVPPNALLTYEIELLDSK |
| XP_017147297 | MILPMLKVGEVAEVVVDPRFGYGTGLGLK---KDNDGDFIVPPNALLTYEIELLDSK |
| XP_019879021 | IAITSMNLHERSLFIIDPGLAYGPEGVN-----EIVPKNATIICVIELTRLM      |
