# Supplementary material for: Compression of Large Sets of Sequence Data Reveals Fine Diversification of Functional Profiles in Multigene Families of Proteins: A Study for Peptidyl-Prolyl cis/trans Isomerases (PPIase)
Source: MDPI journal article supplement (doi:10.3390/biom9020059), 2019-02-11
Supplement: s1 [file s1]

|    | PPIA  | PPIB  | PPIC  | PPIF  | PPIL3A | PPIL1 | PPID  | PPWD1 | PPIL2 | RANBP | PIIH  | PIIG  | NKTR  | PPIE  | PPIL4 | CWC27 | PPIL6 | Structure |
|----|-------|-------|-------|-------|--------|-------|-------|-------|-------|-------|-------|-------|-------|-------|-------|-------|-------|-----------|
| 1  | 0,185 | 0,086 | 0,324 | 0,745 | -      | -     | 0,788 | 0,188 | -     | 0,048 | 0,676 | 0,087 | 0,036 | 0,628 | -     | 0,033 | 0,445 |           |
| 2  | 0,188 | 0,155 | 0,38  | 0,261 | -      | -     | 0,414 | 0,16  | -     | 0     | 0,052 | 0,009 | 0,053 | 0,004 | -     | 0,101 | 0,038 |           |
| 3  | 0,143 | 0,64  | 0,489 | 0,196 | -      | -     | 0,15  | 0,241 | -     | 0,012 | 0,029 | 0,104 | 0,053 | 0,018 | -     | 0,052 | 0,617 |           |
| 4  | 0,374 | 0,166 | 0,467 | 0,465 | -      | -     | 0,141 | 0,201 | 0,07  | 0,154 | 0,01  | 0,371 | 0,049 | 0,035 | -     | 0,051 | 0,043 | β         |
| 5  | 0,061 | 0     | 0     | 0,152 | -      | -     | 0,332 | 0,039 | 0,049 | 0     | 0,014 | 0,104 | 0,053 | 0,004 | -     | 0,101 | 0     | β         |
| 6  | 0,118 | 0,025 | 0     | 0,196 | -      | -     | 0,101 | 0,004 | 0,497 | 0     | 0,014 | 0,082 | 0,52  | 0     | -     | 0,1   | 0     | β         |
| 7  | 0,067 | 0,006 | 0,039 | 0,509 | -      | 0,296 | 0,426 | 0,182 | 0,158 | 0,217 | 0,131 | 0,082 | 0,027 | 0,276 | -     | 0,461 | 0,047 | β 1       |
| 8  | 0,026 | 0,013 | 0     | 0,168 | 0,299  | 0,649 | 0,156 | 0,073 | 0,083 | 0,215 | 0,019 | 0     | 0,014 | 0     | -     | 0,078 | 0,01  | β         |
| 9  | 0,067 | 0,013 | 0     | 0,159 | 0,503  | 0,676 | 0,132 | 0,11  | 0,031 | 0     | 0,005 | 0,016 | 0,009 | 0     | 0,042 | 0,042 | 0,005 | β         |
| 10 | 0,37  | 0,429 | 0,304 | 0,64  | 0,005  | 0,038 | 0,544 | 0,048 | 0,016 | 0,592 | 0,221 | 0,609 | 0,027 | 0,254 | 0,418 | 0     | 0,744 | β         |
| 11 | 0,101 | 0,17  | 0     | 0,149 | 0,029  | 0,574 | 0,107 | 0,089 | 0,113 | 0,008 | 0,019 | 0,004 | 0,027 | 0     | 0,061 | 0,009 | 0,043 | τ         |
| 12 | 0,117 | 0,006 | 0,097 | 0,234 | 0,038  | 0,292 | 0,296 | 0     | 0,053 | 0,004 | 0,14  | 0,352 | 0,031 | 0,033 | 0,076 | 0     | 0,481 | τ         |
| 13 | 0,347 | 0,193 | 0,247 | 0,635 | 0,088  | 0,097 | 0,348 | 0,004 | 0,707 | 0,494 | 0,642 | 0,489 | 0,031 | 0,3   | 0,056 | 0,057 | 0,802 | τ         |
| 14 | 0,295 | 0,203 | 0,061 | 0,357 | 0,01   | 0,04  | 0,413 | 0     | 0,019 | 0,029 | 0,547 | 0,532 | 0,022 | 0,244 | 0,138 | 0     | 0,682 | τ         |
| 15 | 0,197 | 0,404 | 0     | 0,323 | 0,019  | 0,068 | 0,609 | 0,073 | 0,349 | 0,111 | 0,497 | 0,259 | 0,014 | 0,35  | 0,081 | 0,009 | 0,44  | β         |
| 16 | 0,114 | 0,05  | 0     | 0,176 | 0,083  | 0,048 | 0,342 | 0,044 | 0,648 | 0,004 | 0,005 | 0,008 | 0     | 0,021 | 0,09  | 0,057 | 0,143 | β         |
| 17 | 0,223 | 0     | 0     | 0,273 | 0,024  | 0     | 0,004 | 0     | 0     | 0     | 0,005 | 0,004 | 0     | 0,004 | 0,094 | 0     | 0,038 | β         |
| 18 | 0,294 | 0,062 | 0     | 0,221 | -      | 0,693 | 0,008 | 0     | 0,515 | 0,189 | 0,074 | 0     | 0     | 0,025 | 0,095 | 0,004 | 0,174 | β 2       |
| 19 | 0,062 | 0     | 0     | 0,185 | 0,038  | 0,36  | 0,012 | 0     | 0     | 0     | 0,009 | 0,004 | 0     | 0,004 | 0,114 | 0     | 0,024 | β         |
| 20 | 0,137 | 0,218 | 0,061 | 0,481 | 0,033  | 0,608 | 0,093 | 0,091 | 0,066 | 0,113 | 0,38  | 0,02  | 0     | 0,567 | 0,346 | 0,018 | 0,098 | β         |
| 21 | 0,256 | 0,262 | 0     | 0,526 | 0,024  | 0,104 | 0,47  | 0,236 | 0,05  | 0     | 0,355 | 0,22  | 0,009 | 0,234 | 0,374 | 0     | 0,175 | β         |
| 22 | 0,201 | 0     | 0,008 | 0,099 | 0,162  | 0     | 0,012 | 0,082 | 0     | 0,008 | 0,005 | 0,008 | 0,009 | 0,072 | 0,114 | 0     | 0,023 | β         |
| 23 | 0,022 | 0,006 | 0     | 0     | 0,024  | 0     | 0     | 0     | 0     | 0     | 0,005 | 0,004 | 0,004 | 0     | 0,076 | 0     | 0     | β         |
| 24 | 0,034 | 0,013 | 0     | 0,348 | 0,009  | 0,002 | 0     | 0,004 | 0,57  | 0,052 | 0,009 | 0,012 | 0,004 | 0,008 | 0,071 | 0     | 0,005 | α         |
| 25 | 0,061 | 0,006 | 0,016 | 0,056 | 0,083  | 0,529 | 0,43  | 0,141 | 0,416 | 0,22  | 0,216 | 0,144 | 0,004 | 0,446 | 0,179 | 0,158 | 0,518 | α         |
| 26 | 0,033 | 0,119 | 0,225 | 0     | 0,028  | 0,625 | 0,059 | 0,215 | 0,077 | 0,235 | 0,009 | 0,004 | 0,004 | 0     | 0,409 | 0     | 0,014 | α 1       |
| 27 | 0,163 | 0,131 | 0     | 0     | 0,024  | 0,041 | 0,052 | 0,004 | 0,659 | 0     | 0,126 | 0,028 | 0,004 | 0     | 0,369 | 0     | 0,313 | α         |
| 28 | 0,195 | 0,025 | 0     | 0,008 | 0,683  | 0,085 | 0,136 | 0,035 | 0,491 | 0     | 0,233 | 0,04  | 0,004 | 0,008 | 0,189 | 0,293 | 0,093 | α         |
| 29 | 0,039 | 0,006 | 0     | 0     | 0,663  | 0,002 | 0,004 | 0,018 | 0,037 | 0,016 | 0,009 | 0,004 | 0     | 0     | 0,269 | 0     | 0,005 | α         |
| 30 | 0,033 | 0,013 | 0,209 | 0,008 | 0,069  | 0,316 | 0,004 | 0,004 | 0,032 | 0,383 | 0,036 | 0,136 | 0,004 | 0,281 | 0,103 | 0,069 | 0,019 | α         |
| 31 | 0,065 | 0     | 0     | 0     | 0,065  | 0,035 | 0,004 | 0,022 | 0,49  | 0     | 0,032 | 0     | 0     | 0     | 0,422 | 0,026 | 0     | α         |
| 32 | 0,06  | 0,124 | 0     | 0,024 | 0,418  | 0,041 | 0,028 | 0     | 0,455 | 0,032 | 0,26  | 0,177 | 0,268 | 0,041 | 0,549 | 0,04  | 0,224 | α         |
| 33 | 0,022 | 0,169 | 0,105 | 0,008 | 0,339  | 0,335 | 0,016 | 0     | 0,429 | 0     | 0,014 | 0,37  | 0,022 | 0     | 0,393 | 0,004 | 0,517 | α         |
| 34 | 0,065 | 0     | 0     | 0     | 0,097  | 0,008 | 0,016 | 0,004 | 0     | 0,004 | 0     | 0     | 0     | 0     | 0,349 | 0     | 0     | α 2       |
| 35 | 0,054 | 0     | 0,008 | 0,008 | 0,027  | 0,035 | 0     | 0     | 0,002 | 0     | 0,018 | 0     | 0     | 0     | 0,005 | 0     | 0     | α         |
| 36 | 0,175 | 0,349 | 0     | 0,008 | 0,7    | 0,414 | 0,016 | 0,069 | 0,081 | 0     | 0,005 | 0,369 | 0     | 0,004 | 0     | 0,031 | 0,466 | α         |
| 37 | 0,038 | 0,408 | 0,154 | 0,008 | 0,4    | 0,431 | 0,067 | 0,044 | 0,434 | 0     | 0,028 | 0,2   | 0,088 | 0,199 | 0     | 0,004 | 0,347 | α         |
| 38 | 0,033 | 0     | 0     | 0     | 0,7    | 0     | 0     | 0     | 0,313 | 0     | 0,322 | 0     | 0     | 0     | 0     | 0     | 0     | α         |
| 39 | 0,128 | 0,067 | 0     | 0     | 0,023  | 0,467 | 0,016 | 0,048 | 0,442 | 0     | 0,018 | 0     | 0     | 0     | 0     | 0,044 | 0,014 | α         |
| 40 | 0,033 | 0,257 | 0,023 | 0     | 0,005  | 0,4   | 0,016 | 0,018 | 0,501 | 0     | 0,018 | 0,012 | 0,004 | 0,029 | 0     | 0,035 | 0,287 | α         |
| 41 | 0,065 | 0,199 | 0     | 0     | 0,018  | 0,054 | 0     | 0,009 | 0,438 | 0     | 0,018 | 0,012 | 0     | 0,045 | 0,005 | 0,022 | 0,005 | τ         |
| 42 | 0,017 | 0,219 | 0,008 | 0     | 0,023  | 0,137 | 0     | 0,031 | 0,555 | 0,004 | 0,005 | 0     | 0     | 0     | 0,101 | 0,65  | 0,682 | τ         |
| 43 | 0,011 | 0,149 | 0,031 | 0,071 | 0,093  | -     | 0,032 | -     | -     | 0,052 | 0,149 | 0,028 | 0,009 | 0,004 | 0,009 | -     | 0,413 | τ         |
| 44 | 0,038 | 0,098 | 0     | 0     | 0,067  | -     | 0     | -     | -     | 0     | 0,043 | 0,008 | 0,013 | 0,008 | -     | -     | 0,437 | τ         |
| 45 | -     | -     | -     | -     | -      | -     | 0,45  | -     | -     | -     | 0,137 | 0,499 | 0,221 | -     | -     | -     | 0,673 |           |
| 46 | -     | -     | -     | -     | -      | -     | 0,02  | -     | -     | -     | 0,004 | 0,013 | -     | -     | -     | -     | 0,411 |           |
| 47 | -     | -     | -     | -     | -      | -     | 0,538 | -     | -     | -     | 0,036 | 0     | -     | -     | -     | -     | 0,504 |           |
| 48 | -     | -     | -     | -     | -      | -     | 0,487 | -     | -     | -     | 0,353 | 0,236 | -     | -     | -     | -     | -     |           |
| 49 | -     | -     | -     | -     | -      | -     | 0,162 | -     | -     | -     | 0,429 | 0     | 0     | -     | -     | -     | 0,584 |           |
| 50 | -     | -     | -     | -     | -      | -     | 0,036 | -     | -     | -     | 0,086 | 0,459 | 0,089 | -     | -     | -     | 0,236 |           |
| 51 | -     | -     | -     | -     | -      | -     | 0,189 | -     | -     | -     | 0,136 | 0     | 0     | -     | -     | -     | 0,507 |           |
| 52 | -     | -     | -     | -     | 0,089  | -     | 0,052 | -     | -     | -     | 0,019 | 0,409 | 0,03  | -     | -     | -     | 0,631 |           |
| 53 | 0,033 | 0,236 | 0,008 | 0,016 | 0,478  | -     | 0,004 | -     | -     | 0,008 | 0,21  | 0     | 0     | 0     | -     | -     | 0,014 |           |
| 54 | 0,138 | 0,074 | 0,038 | 0,008 | 0,014  | 0,004 | 0,134 | 0     | 0,025 | 0,016 | 0,009 | 0,375 | 0,022 | 0     | 0,045 | 0     | 0,568 |           |
| 55 | 0,028 | 0,006 | 0     | 0     | 0,032  | 0     | 0,02  | 0     | 0     | 0,188 | 0,005 | 0,004 | 0     | 0     | 0     | 0     | 0     | β         |
| 56 | 0,022 | 0,225 | 0,046 | 0,016 | 0,227  | 0,082 | 0     | 0     | 0,347 | 0,092 | 0,009 | 0,004 | 0,004 | 0,24  | 0     | 0,093 | 0,416 | β         |
| 57 | 0,102 | 0,509 | 0     | 0     | 0,36   | 0,576 | 0,024 | 0,135 | 0,452 | 0,17  | 0,307 | 0,528 | 0     | 0,012 | 0,208 | 0,353 | 0,533 | β         |
| 58 | 0,038 | 0,006 | 0     | 0,008 | 0,331  | 0,525 | 0,436 | 0,031 | 0,446 | 0,012 | 0,631 | 0,501 | 0     | 0,012 | 0,436 | 0,026 | 0,032 | β         |
| 59 | 0,312 | 0,197 | 0,342 | 0,236 | 0,186  | 0,537 | 0,533 | 0,492 | 0,521 | 0,514 | 0,635 | 0,406 | 0     | 0,065 | 0,135 | 0,126 | 0,115 | β 3       |
| 60 | 0,06  | 0     | 0     | 0,008 | 0,067  | 0,071 | 0     | 0,06  | 0,009 | 0,004 | 0,005 | 0,028 | 0     | 0,064 | 0,486 | 0     | 0,122 | β         |
| 61 | 0,028 | 0     | 0     | 0     | 0,162  | 0     | 0     | 0     | 0,005 | 0,04  | 0     | 0,008 | 0     | 0     | 0,329 | 0,004 | 0,009 | β         |
| 62 | 0,022 | 0     | 0     | 0     | 0,032  | 0,002 | 0,004 | 0     | 0,002 | 0     | 0,005 | 0,004 | 0     | 0     | 0,496 | 0     | 0,028 | β         |
| 63 | 0,028 | 0     | 0     | 0     | 0,036  | 0,002 | 0,004 | 0,009 | 0,541 | 0,004 | 0,005 | 0     | 0     | 0     | 0     | 0     | 0,028 | β         |
| 64 | 0,011 | 0     | 0     | 0     | 0,032  | 0     | 0,012 | 0     | 0,002 | 0,004 | 0,014 | 0     | 0     | 0     | 0,063 | 0,013 | 0,005 |           |
| 65 | 0,06  | 0,121 | 0     | 0,008 | 0,105  | 0,619 | 0,051 | 0     | 0,081 | 0,406 | 0,005 | 0,004 | 0     | 0     | 0,376 | 0,354 | 0,635 |           |
| 66 | 0,112 | 0,025 | 0     | 0,508 | 0,05   | 0,07  | 0,644 | 0,106 | 0,305 | 0,134 | 0,027 | 0,032 | 0,043 | 0,025 | 0,058 | 0,304 | 0,18  | β         |

|     |       |       |       |       |       |       |       |       |       |       |       |       |       |       |       |       |       |   |
|-----|-------|-------|-------|-------|-------|-------|-------|-------|-------|-------|-------|-------|-------|-------|-------|-------|-------|---|
| 67  | 0,017 | 0     | 0     | 0,008 | 0     | 0,017 | 0     | 0     | 0,002 | 0,025 | 0     | 0     | 0     | 0     | 0,079 | 0,004 | 0,144 | β |
| 68  | 0,017 | 0     | 0     | 0     | 0,032 | 0,002 | 0,004 | 0     | 0,002 | 0,02  | 0,005 | 0     | 0     | 0     | 0,032 | 0,013 | 0     | β |
| 69  | 0,028 | 0,013 | 0     | 0,016 | 0,041 | 0,006 | 0,028 | 0     | 0,005 | 0,004 | 0,018 | 0,004 | 0     | 0,037 | 0,036 | 0     | 0     | β |
| 70  | 0,017 | 0     | 0     | 0,008 | 0,027 | 0,004 | 0,008 | 0     | 0,005 | 0,044 | 0     | 0,004 | 0     | 0     | 0     | 0     | 0,005 |   |
| 71  | 0,038 | 0     | 0     | 0,491 | 0     | 0,313 | 0,024 | 0,004 | 0,021 | 0,004 | 0,397 | 0,032 | 0     | 0,325 | 0,128 | 0     | 0,046 |   |
| 72  | 0,055 | 0     | 0     | 0     | 0,209 | 0,002 | 0,004 | 0     | 0,002 | 0     | 0,005 | 0     | 0     | 0     | 0     | 0     | 0,005 |   |
| 73  | 0,028 | 0     | 0     | 0     | 0,032 | 0     | 0,004 | 0,018 | 0     | 0     | 0,005 | 0     | 0     | 0     | 0     | 0     | 0     |   |
| 74  | 0,049 | 0     | 0,22  | 0     | 0,027 | 0,008 | 0,206 | 0     | 0     | 0     | 0,058 | 0,004 | 0     | 0,008 | 0     | 0     | 0,01  |   |
| 75  | 0,055 | 0,019 | 0,008 | 0,008 | 0,036 | 0,002 | 0,02  | 0,123 | 0,025 | 0,004 | 0,032 | 0     | 0     | 0     | 0,362 | 0,213 | 0,498 |   |
| 76  | 0,353 | 0,137 | 0,41  | 0,04  | 0,32  | 0,058 | 0,438 | 0     | 0,14  | 0,462 | 0,483 | 0,143 | 0     | 0,037 | 0,233 | 0,017 | 0,781 |   |
| 77  | 0,049 | 0,037 | 0,09  | 0,016 | 0,416 | -     | 0,587 | -     | -     | 0,36  | 0,163 | 0,004 | 0     | 0,053 | -     | -     | 0,33  |   |
| 78  | 0,06  | 0     | 0,008 | 0     | 0,018 | 0,002 | 0,012 | 0,138 | 0,041 | 0     | 0     | 0,012 | 0,035 | 0,012 | 0,045 | 0,209 | 0,27  |   |
| 79  | 0,044 | 0     | 0     | 0     | 0,009 | 0     | 0,004 | 0     | 0,002 | 0     | 0     | 0     | 0     | 0     | 0,014 | 0     | 0     |   |
| 80  | 0,044 | 0,019 | 0,031 | 0     | 0     | 0,01  | 0,04  | 0,208 | 0,628 | 0,004 | 0,023 | 0,16  | 0     | 0     | 0,147 | 0,357 | 0,106 |   |
| 81  | 0,033 | 0     | 0     | 0     | 0,132 | 0,004 | 0,004 | 0,004 | 0     | 0     | 0     | 0     | 0     | 0,004 | 0,027 | 0,004 | 0,527 | τ |
| 82  | 0,107 | 0     | 0     | 0     | 0,005 | 0,002 | 0,004 | 0     | 0     | 0,016 | 0,512 | 0     | 0     | 0     | 0     | 0     | 0,005 | τ |
| 83  | 0,011 | 0     | 0,544 | 0,016 | 0,572 | 0,645 | 0,004 | 0,009 | 0,319 | 0,39  | 0,496 | 0,004 | 0     | 0,004 | 0,124 | 0,004 | 0,019 | τ |
| 84  | 0,065 | 0,006 | 0     | 0,008 | 0     | 0,004 | 0,008 | 0,004 | 0,002 | 0     | 0,032 | 0,004 | 0     | 0     | 0,023 | 0,004 | 0,01  | τ |
| 85  | 0,027 | 0     | 0,008 | 0     | 0,009 | 0,002 | 0     | 0     | 0,549 | 0     | 0,005 | 0     | 0     | 0     | 0,014 | 0,004 | 0     |   |
| 86  | 0,028 | 0     | 0     | 0,008 | 0,005 | 0,006 | 0,004 | 0     | 0     | 0     | 0,005 | 0,004 | 0     | 0     | 0,014 | 0     | 0,024 |   |
| 87  | 0,127 | 0,006 | 0     | 0,008 | 0,263 | 0,006 | 0,008 | 0     | 0,197 | 0,004 | 0,522 | 0,008 | 0     | 0,004 | 0,671 | 0,022 | 0,005 |   |
| 88  | -     | -     | -     | -     | -     | -     | -     | -     | -     | -     | -     | -     | -     | -     | 0,672 | -     | -     |   |
| 89  | -     | -     | -     | -     | -     | -     | -     | -     | -     | -     | -     | -     | -     | -     | 0,005 | -     | -     |   |
| 90  | -     | -     | -     | -     | -     | -     | -     | -     | -     | -     | -     | -     | -     | -     | 0,278 | -     | -     |   |
| 91  | -     | -     | -     | -     | -     | -     | -     | -     | -     | -     | -     | -     | -     | -     | 0,005 | -     | -     |   |
| 92  | -     | -     | -     | -     | -     | -     | -     | -     | -     | -     | -     | -     | -     | -     | 0,085 | -     | -     |   |
| 93  | -     | -     | -     | -     | -     | -     | -     | -     | -     | -     | -     | -     | -     | -     | 0,246 | -     | -     |   |
| 94  | -     | -     | -     | -     | -     | -     | -     | -     | -     | -     | -     | -     | -     | -     | 0,124 | -     | -     |   |
| 95  | 0,097 | 0,05  | 0,247 | 0,415 | 0,302 | 0,672 | 0,304 | 0,018 | 0,165 | 0,532 | 0,74  | 0,012 | 0,004 | 0,209 | 0,402 | 0,559 | 0,176 |   |
| 96  | 0,028 | 0,006 | 0,546 | 0,071 | 0,093 | 0,579 | 0,055 | 0     | 0,557 | 0,578 | 0,693 | 0,175 | 0     | 0,004 | 0,023 | 0,047 | 0,259 |   |
| 97  | 0,033 | 0     | 0     | 0     | 0,005 | 0,002 | 0,004 | 0     | 0,009 | 0     | 0,014 | 0,008 | 0     | 0     | 0,027 | 0     | 0     |   |
| 98  | 0,332 | 0,385 | 0,199 | 0,131 | 0,102 | 0,329 | 0,108 | 0,031 | 0,614 | 0,008 | 0,677 | 0,379 | 0,267 | 0,025 | 0,084 | 0,026 | 0,033 |   |
| 99  | 0,006 | 0,006 | 0     | 0     | 0     | 0     | 0,004 | 0     | 0     | 0     | 0,005 | 0     | 0     | 0     | 0,335 | 0     | 0,006 |   |
| 100 | 0,022 | 0,006 | 0     | 0     | 0     | 0     | 0,004 | 0     | 0     | 0     | 0     | 0,004 | 0     | 0     | 0     | 0     | 0,023 |   |
| 101 | -     | -     | -     | -     | 0,32  | 0,029 | -     | 0,031 | 0,282 | -     | -     | -     | -     | -     | 0,553 | 0,035 | -     |   |
| 102 | 0,044 | 0     | 0,008 | 0,008 | 0,547 | 0,526 | 0,156 | 0,026 | 0,499 | 0,068 | 0,153 | 0,465 | 0     | 0     | 0,342 | 0     | 0,461 |   |
| 103 | 0,096 | 0     | 0     | 0     | 0,152 | 0,598 | 0,036 | 0,377 | 0,606 | 0     | 0,005 | 0,004 | 0,009 | 0     | 0,081 | 0,056 | 0,018 |   |
| 104 | 0,071 | 0,031 | 0,016 | 0,69  | 0,739 | 0,396 | 0,621 | 0,146 | 0,541 | 0,163 | 0,723 | 0,359 | 0,197 | 0,266 | 0,218 | 0     | 0,493 |   |
| 105 | 0,07  | 0,006 | 0     | 0     | 0,023 | 0     | 0,47  | 0     | 0,212 | 0     | 0,102 | 0,024 | 0     | 0     | 0,005 | 0     | 0,028 |   |
| 106 | 0,065 | 0,086 | 0,023 | 0,048 | 0,005 | 0,013 | 0,119 | 0,004 | 0,48  | 0     | 0,102 | 0,051 | 0     | 0     | 0,138 | 0,004 | 0,598 |   |
| 107 | 0,038 | 0     | 0     | 0     | 0     | 0,418 | 0     | 0     | 0     | 0     | 0,023 | 0,004 | 0     | 0     | 0     | 0,004 | 0,029 |   |
| 108 | 0,044 | 0,219 | 0,21  | 0,569 | 0,504 | 0,087 | 0,067 | 0     | 0,506 | 0,008 | 0,424 | 0,051 | 0     | 0,025 | 0,502 | 0,42  | 0,537 |   |
| 109 | 0,055 | 0,135 | 0,008 | 0,008 | 0,368 | 0     | 0,222 | 0,013 | 0,507 | 0,141 | 0,674 | 0,024 | 0,004 | 0,251 | 0,067 | 0     | 0,311 |   |
| 110 | 0,106 | 0,405 | 0,046 | 0,04  | 0     | 0,008 | 0,685 | 0,009 | 0     | 0     | 0,166 | 0,492 | 0,013 | 0,1   | 0,468 | 0     | 0,018 |   |
| 111 | 0,117 | 0,086 | 0,068 | 0     | 0,005 | 0,002 | 0,31  | 0     | 0     | 0     | 0,005 | 0,012 | 0     | 0     | 0     | 0     | 0     | β |
| 112 | 0,022 | 0,2   | 0     | 0     | 0,076 | 0     | 0,016 | 0     | 0,146 | 0,024 | 0,05  | 0     | 0     | 0,374 | 0,448 | 0     | 0,101 | β |
| 113 | 0,022 | 0     | 0     | 0     | 0     | 0,002 | 0     | 0,009 | 0     | 0     | 0,005 | 0     | 0     | 0     | 0     | 0     | 0     | β |
| 114 | 0,033 | 0     | 0     | 0     | 0,088 | 0,418 | 0,004 | 0     | 0,009 | 0,008 | 0,045 | 0,004 | 0     | 0     | 0,097 | 0,123 | 0,009 | β |
| 115 | 0,038 | 0     | 0     | 0     | 0     | 0,004 | 0,004 | 0     | 0     | 0     | 0,014 | 0     | 0     | 0     | 0,1   | 0,022 | 0,005 | β |
| 116 | 0,017 | 0     | 0     | 0     | 0     | 0     | 0     | 0     | 0     | 0     | 0,005 | 0     | 0     | 0     | 0     | 0     | 0,009 | β |
| 117 | 0,033 | 0,006 | 0     | 0     | 0,027 | 0,002 | 0     | 0     | 0,002 | 0,04  | 0     | 0     | 0     | 0,004 | 0,163 | 0,009 | 0,009 | β |
| 118 | 0,017 | 0,108 | 0,487 | 0     | 0,344 | 0,501 | 0,28  | 0,093 | 0,467 | 0,252 | 0,1   | 0,008 | 0     | 0,012 | 0,366 | 0,22  | 0,178 |   |
| 119 | 0,028 | 0     | 0     | 0     | 0,005 | 0,002 | 0,004 | 0     | 0     | 0     | 0     | 0     | 0     | 0     | 0,004 | 0,076 | 0,022 | 0 |
| 120 | 0,055 | 0,138 | 0,008 | 0,016 | 0,05  | 0,087 | 0,459 | 0,551 | 0,508 | 0,423 | 0,471 | 0,02  | 0,004 | 0,2   | 0,554 | 0,545 | 0,366 |   |
| 121 | 0,028 | 0,006 | 0,023 | 0     | 0,005 | 0,025 | 0,473 | 0,235 | 0,162 | 0,004 | 0,506 | 0,254 | 0,258 | 0,004 | 0,213 | 0,38  | 0,005 |   |
| 122 | 0,038 | 0     | 0     | 0     | 0,116 | 0,008 | 0     | 0     | 0,041 | 0,024 | 0,005 | 0     | 0     | 0     | 0,507 | 0,009 | 0     |   |
| 123 | 0,028 | 0     | 0     | 0     | 0,009 | 0     | 0     | 0     | 0,002 | 0     | 0     | 0     | 0     | 0,008 | 0,44  | 0     | 0,005 |   |
| 124 | 0,152 | 0     | 0     | 0     | 0,328 | 0,048 | 0,008 | 0     | 0,647 | 0,137 | 0     | 0     | 0     | 0,021 | 0,121 | 0,13  | 0,275 |   |
| 125 | 0,038 | 0     | 0     | 0     | 0,005 | 0     | 0     | 0,004 | 0,002 | 0     | 0,071 | 0     | 0     | 0     | 0     | 0     | 0     |   |
| 126 | 0,049 | 0     | 0     | 0     | 0     | 0,002 | 0     | 0     | 0     | 0     | 0     | 0     | 0     | 0     | 0,014 | 0     | 0     | β |
| 127 | 0,055 | 0     | 0     | 0     | 0     | 0     | 0     | 0     | 0     | 0     | 0,005 | 0     | 0     | 0     | 0     | 0     | 0,005 | β |
| 128 | 0,044 | 0     | 0     | 0     | 0     | 0     | 0     | 0     | 0     | 0,052 | 0,005 | 0     | 0     | 0     | 0,474 | 0     | 0     | β |
| 129 | 0,044 | 0     | 0     | 0     | 0,244 | 0,029 | 0     | 0,004 | 0,044 | 0     | 0,009 | 0     | 0     | 0,004 | 0,058 | 0,056 | 0     | β |
| 130 | 0,017 | 0,025 | 0,164 | 0,032 | 0,058 | 0,008 | 0,024 | 0,004 | 0,242 | 0,068 | 0     | 0,024 | 0     | 0,276 | 0,009 | 0     | 0,009 | β |
| 131 | 0,065 | 0,061 | 0,097 | 0     | 0,005 | 0,017 | 0,067 | 0     | 0,005 | 0     | 0,023 | 0,004 | 0     | 0,432 | 0,471 | 0,123 | 0,089 |   |
| 132 | 0,282 | 0,169 | 0,125 | 0,277 | 0,561 | 0,208 | 0,254 | 0,026 | 0,048 | 0,033 | 0,53  | 0,161 | 0     | 0,264 | 0,404 | 0,282 | 0,032 |   |

|     |       |       |       |       |       |       |       |       |       |       |       |       |       |       |       |       |       |            |
|-----|-------|-------|-------|-------|-------|-------|-------|-------|-------|-------|-------|-------|-------|-------|-------|-------|-------|------------|
| 133 | 0,038 | 0,489 | 0     | 0,048 | 0,482 | 0,008 | 0,291 | 0     | 0,508 | 0,008 | 0,186 | 0,176 | 0,288 | 0,017 | 0,234 | 0,404 | 0,53  |            |
| 134 | -     | -     | -     | -     | -     | -     | -     | -     | -     | -     | -     | -     | -     | -     | 0,119 | -     | -     |            |
| 135 | 0,06  | 0,019 | 0,274 | 0,016 | 0,124 | 0,288 | 0,044 | 0,052 | 0,446 | 0,052 | 0,084 | 0,46  | 0     | 0     | 0,058 | 0,365 | 0,504 | $\alpha$   |
| 136 | 0,038 | 0,652 | 0,282 | 0,071 | 0,173 | 0,505 | 0,401 | 0     | 0,719 | 0     | 0,009 | 0,008 | 0,004 | 0,008 | 0,187 | 0,363 | 0,264 | $\alpha$   |
| 137 | 0,076 | 0     | 0     | 0,008 | 0,232 | 0,271 | 0,024 | 0     | 0,554 | 0,13  | 0,005 | 0     | 0     | 0     | 0,241 | 0,013 | 0,018 | $\alpha$ 3 |
| 138 | 0,011 | 0,006 | 0,006 | 0     | 0     | 0     | 0     | 0     | 0,002 | 0     | 0     | 0     | 0     | 0     | 0,005 | 0     | 0     | $\alpha$   |
| 139 | 0,038 | 0     | 0     | 0     | 0     | 0,002 | 0     | 0     | 0,002 | 0     | 0,005 | 0     | 0     | 0     | 0,005 | 0,013 | 0     | $\alpha$   |
| 140 | 0,033 | 0,013 | 0,013 | 0,085 | 0,259 | 0,216 | 0,112 | 0,009 | 0,528 | 0,064 | 0,525 | 0,132 | 0,018 | 0,087 | 0,303 | 0,106 | 0,196 | $\alpha$   |
| 141 | 0,033 | 0     | 0     | 0     | 0,112 | 0,029 | 0     | 0     | 0,028 | 0     | 0,005 | 0,509 | 0     | 0,012 | 0,501 | 0,056 | 0,305 |            |
| 142 | 0,081 | 0     | 0     | 0     | 0,005 | 0,002 | 0,004 | 0     | 0,005 | 0     | 0,027 | 0,004 | 0,004 | 0     | 0,054 | 0,127 | 0,12  |            |
| 143 | 0,011 | 0     | 0     | 0     | 0,005 | 0,094 | 0,004 | 0     | 0,05  | 0     | 0,009 | 0,016 | 0     | 0,004 | 0,27  | 0     | 0,005 | $\beta$    |
| 144 | 0,017 | 0,006 | 0,006 | 0     | 0,005 | 0     | 0,004 | 0     | 0     | 0     | 0,005 | 0     | 0     | 0     | 0     | 0     | 0,014 | $\beta$    |
| 145 | 0,065 | 0     | 0     | 0,008 | 0,023 | 0,002 | 0     | 0     | 0,002 | 0     | 0,005 | 0     | 0     | 0     | 0,005 | 0,009 | 0,005 | $\beta$    |
| 146 | 0,033 | 0     | 0     | 0     | 0,071 | 0,002 | 0,004 | 0     | 0,059 | 0,004 | 0     | 0     | 0     | 0     | 0,014 | 0,039 | 0,005 | $\beta$ 7  |
| 147 | 0,184 | 0,17  | 0,17  | 0,436 | 0,005 | 0,004 | 0,336 | 0     | 0,082 | 0,004 | 0,041 | 0,497 | 0,004 | 0,279 | 0,072 | 0     | 0,161 | $\beta$    |
| 148 | 0,011 | 0     | 0     | 0     | 0,005 | 0     | 0     | 0,196 | 0,002 | 0     | 0     | 0     | 0     | 0     | 0     | 0     | 0,056 | $\beta$    |
| 149 | 0,033 | 0,013 | 0,013 | 0,146 | 0,005 | 0,753 | 0,02  | 0,202 | 0,009 | 0,016 | 0,005 | 0,004 | 0     | 0,44  | 0,292 | 0,165 | 0,089 | $\beta$    |
| 150 | -     | -     | -     | -     | -     | -     | -     | -     | -     | -     | -     | -     | -     | -     | -     | 0,018 | -     |            |
| 151 | 0,039 | 0,16  | 0,16  | 0,008 | 0,164 | 0,664 | 0,272 | 0,013 | 0,215 | 0,008 | 0,034 | 0,036 | 0     | 0,257 | 0     | 0,031 | 0,071 | $\beta$    |
| 152 | 0,134 | 0     | 0     | 0     | 0,005 | 0,004 | 0,004 | 0     | 0,157 | 0     | 0,089 | 0     | 0     | 0     | 0     | 0,004 | 0,066 | $\alpha$   |
| 153 | 0,06  | 0,149 | 0,149 | 0,048 | 0,442 | 0     | 0,328 | 0     | 0,625 | 0     | 0,036 | 0,398 | 0     | 0,012 | 0,31  | 0,004 | 0,297 | $\alpha$   |
| 154 | 0,112 | 0,062 | 0,062 | 0,008 | 0     | 0,761 | 0,327 | 0     | 0,265 | 0,064 | 0,018 | 0,012 | 0     | 0     | 0     | 0,009 | 0,206 | $\alpha$   |
| 155 | 0,07  | 0     | 0     | 0     | 0,381 | 0,133 | 0,016 | 0,018 | 0,414 | 0,501 | 0,183 | 0,004 | 0     | 0,004 | 0,175 | 0,004 | 0,079 | $\alpha$   |
| 156 | 0,017 | 0     | 0     | 0     | 0     | 0,01  | 0,059 | 0,031 | 0,002 | 0     | 0,005 | 0     | 0     | 0     | 0     | 0,004 | 0,033 | $\alpha$ 5 |
| 157 | 0,138 | 0,284 | 0,284 | 0,048 | 0     | 0,547 | 0,02  | 0,009 | 0,579 | 0,152 | 0,009 | 0,458 | 0,276 | 0,077 | 0,683 | 0,022 | 0,54  | $\alpha$   |
| 158 | 0,168 | 0,109 | 0,109 | 0,063 | 0,263 | 0,047 | 0,544 | 0,18  | 0,572 | 0,162 | 0,014 | 0,42  | 0,249 | 0,494 | 0,363 | 0,004 | 0,552 | $\alpha$   |
| 159 | 0,055 | 0,013 | 0,013 | 0     | 0,018 | 0     | 0,02  | 0     | 0,016 | 0     | 0,005 | 0     | 0     | 0,008 | 0,178 | 0,018 | 0,01  | $\alpha$   |
| 160 | 0,033 | 0     | 0     | 0     | 0     | 0,096 | 0     | 0,082 | 0,002 | 0,252 | 0,005 | 0,004 | 0     | 0,008 | 0,018 | 0,641 | 0,056 | $\alpha$   |
| 161 | 0,367 | 0,668 | 0,668 | 0,168 | 0,018 | 0,339 | 0,467 | 0,131 | 0,627 | 0,258 | 0,094 | 0,375 | 0,274 | 0,344 | 0,041 | 0,004 | 0,559 |            |
| 162 | 0,277 | 0,195 | 0,195 | 0,164 | 0,119 | 0,006 | 0,153 | 0,052 | 0,135 | 0,257 | 0,123 | 0,432 | 0,004 | 0,388 | 0,488 | 0,282 | 0,221 |            |
| 163 | 0,05  | 0,354 | 0,354 | 0     | 0,288 | 0,615 | 0,437 | 0     | 0,459 | 0,004 | 0,52  | 0,146 | 0     | 0,098 | 0,42  | 0,319 | 0,4   |            |
| 164 | 0,133 | 0,138 | 0,138 | 0,008 | 0,154 | 0,155 | 0,496 | 0,202 | 0,492 | 0,02  | 0,21  | 0,165 | 0,004 | 0,205 | 0,475 | 0,266 | 0,075 | $\tau$     |
| 165 | -     | 0,344 | 0,344 | -     | 0,224 | 0,301 | -     | 0,082 | 0,087 | -     | 0,18  | 0     | 0     | -     | 0,014 | 0,19  | -     |            |
| 166 | 0,06  | 0,71  | 0,71  | 0,129 | 0,487 | 0,798 | 0,539 | 0,057 | 0,591 | 0,279 | 0,261 | 0,543 | 0,5   | 0,068 | 0,508 | 0,6   | 0,664 | $\tau$     |
| 167 | 0,118 | 0,388 | 0,388 | 0,178 | 0,166 | 0,242 | 0,488 | 0,004 | 0,549 | 0,432 | 0,117 | 0,588 | 0     | 0,403 | 0,152 | 0,018 | 0,111 | $\tau$     |
| 168 | -     | -     | -     | -     | 0,573 | -     | -     | 0,039 | 0,37  | -     | -     | -     | -     | -     | -     | -     | -     |            |
| 169 | 0,118 | 0,049 | 0,049 | 0     | 0,277 | 0,002 | 0,072 | 0     | 0,048 | 0     | 0,101 | 0,032 | 0     | 0,102 | 0,581 | 0,004 | 0,08  | $\tau$     |
| 170 | 0,028 | 0,043 | 0,043 | 0,04  | 0,018 | 0,054 | 0,644 | 0,004 | 0,07  | 0,586 | 0,06  | 0     | 0     | 0,326 | 0,506 | 0,013 | 0,071 |            |
| 171 | 0,112 | 0,006 | 0,006 | 0,273 | 0,014 | 0,021 | 0,049 | 0,004 | 0,002 | 0,254 | 0,038 | 0,004 | 0     | 0,255 | 0     | 0     | 0,071 |            |
| 172 | 0,087 | 0,33  | 0,33  | 0,094 | 0,193 | 0,368 | 0,342 | 0,065 | 0,614 | 0,625 | 0,037 | 0,207 | 0     | 0,378 | 0,058 | 0,571 | 0,62  | $\beta$    |
| 173 | 0,039 | 0,289 | 0,289 | 0,048 | 0,651 | 0,306 | 0,455 | 0     | 0,411 | 0,482 | 0,033 | 0,194 | 0     | 0,133 | 0,239 | 0,617 | 0,763 | $\beta$    |
| 174 | 0,076 | 0,177 | 0,177 | 0,008 | 0,041 | 0,223 | 0,409 | 0     | 0,222 | 0,088 | 0,004 | 0     | 0     | 0,083 | 0,009 | 0,123 | 0,63  | $\beta$    |
| 175 | 0,044 | 0,055 | 0,055 | 0,024 | 0,442 | 0,009 | 0,511 | 0     | 0,05  | 0,008 | 0,004 | 0     | 0     | 0,083 | 0     | 0,278 | 0,137 | $\beta$    |
| 176 | 0,066 | 0,551 | 0,551 | 0,32  | 0,041 | 0,131 | 0,099 | 0,173 | 0,584 | 0,51  | 0,02  | 0,063 | 0     | 0,161 | 0,032 | 0,022 | 0,577 | $\beta$    |
| 177 | 0,071 | 0,006 | 0,006 | 0,016 | 0,014 | 0,006 | 0,207 | 0     | 0,035 | 0,004 | 0,029 | 0     | 0     | 0,087 | 0,005 | 0,004 | 0,089 | $\beta$    |
| 178 | 0,45  | 0,359 | 0,359 | 0,199 | 0,54  | 0,298 | 0,106 | 0     | 0,642 | 0,147 | 0,099 | 0,063 | 0     | 0,481 | 0,583 | 0,412 | 0,54  | $\beta$ 8  |
| 179 | 0,033 | 0,215 | 0,215 | 0,056 | 0,582 | 0,168 | 0,463 | 0,18  | 0,704 | 0,033 | 0,207 | 0,507 | 0,004 | 0,277 | 0,009 | 0,363 | 0,389 | $\beta$    |
| 180 | 0,082 | 0,404 | 0,404 | 0,016 | 0,036 | 0,41  | -     | 0,004 | 0,519 | 0,004 | 0,106 | 0,008 | 0     | 0,099 | 0,032 | 0,558 | 0,535 | $\beta$    |
| 181 | 0,066 | 0,074 | 0,074 | 0     | 0,072 | 0,712 | -     | 0,013 | 0,641 | 0,004 | 0,463 | 0     | 0     | 0,052 | 0,089 | 0,088 | 0,112 | $\beta$    |
| 182 | 0,076 | 0,666 | 0,666 | 0,016 | 0,009 | 0,362 | -     | 0,009 | 0,021 | 0,02  | 0,021 | 0,261 | 0,27  | 0,043 | 0,005 | 0     | 0,636 | $\beta$    |
| 183 | 0,129 | 0,125 | 0,125 | 0,016 | 0,018 | 0,712 | -     | 0,009 | 0,055 | 0,029 | 0,009 | 0,004 | 0     | 0,542 | 0,005 | 0,005 | 0,61  |            |
| 184 | 0,185 | 0,086 | 0,324 | 0,745 | -     | -     | 0,788 | 0,188 | -     | 0,048 | 0,676 | 0,087 | 0,036 | 0,628 | -     | 0,033 | 0,445 |            |
