# Supplementary material for: Compression of Large Sets of Sequence Data Reveals Fine Diversification of Functional Profiles in Multigene Families of Proteins: A Study for Peptidyl-Prolyl cis/trans Isomerases (PPIase)
Source: MDPI journal article supplement (doi:10.3390/biom9020059), 2019-02-11
Supplement: s1 [file s1]

CyP-157 (nuclear membrane)

|      |              |                                                                                |
|------|--------------|--------------------------------------------------------------------------------|
| ( 1) | NP_005376    | NK-tumor recognition protein isoform a [Homo sapiens].                         |
| ( 2) | XP_014646452 | PREDICTED: NK-tumor recognition protein isoform X5 [Ceratotherium simum simum] |
| ( 3) | XP_017657797 | PREDICTED: NK-tumor recognition protein isoform X5 [Nannospalax galili].       |
| ( 4) | XP_012885690 | PREDICTED: NK-tumor recognition protein [Dipodomys ordii].                     |
| ( 5) | XP_008530969 | PREDICTED: NK-tumor recognition protein isoform X8 [Equus przewalskii].        |
| ( 6) | XP_015423871 | PREDICTED: NK-tumor recognition protein isoform X7 [Myotis davidii].           |
| ( 7) | XP_015091833 | PREDICTED: NK-tumor recognition protein isoform X5 [Vicugna pacos].            |
| ( 8) | XP_010973060 | PREDICTED: NK-tumor recognition protein isoform X1 [Camelus dromedarius].      |
| ( 9) | XP_019583096 | PREDICTED: NK-tumor recognition protein isoform X5 [Rhinolophus sinicus].      |
| (10) | XP_011231111 | PREDICTED: NK-tumor recognition protein isoform X3 [Ailuropoda melanoleuca].   |
| (11) | XP_014646457 | PREDICTED: NK-tumor recognition protein isoform X6 [Ceratotherium simum simum] |
| (12) | XP_023988069 | PREDICTED: NK-tumor recognition protein isoform X8 [Physeter catodon].         |
| (13) | XP_008530970 | PREDICTED: NK-tumor recognition protein isoform X9 [Equus przewalskii].        |
| (14) | XP_017497119 | PREDICTED: NK-tumor recognition protein isoform X7 [Manis javanica].           |
| (15) | XP_021503072 | NK-tumor recognition protein isoform X11 [Meriones unguiculatus].              |
| (16) | XP_021503071 | NK-tumor recognition protein isoform X10 [Meriones unguiculatus].              |
| (17) | XP_020041828 | NK-tumor recognition protein isoform X2 [Castor canadensis].                   |
| (18) | XP_021503070 | NK-tumor recognition protein isoform X9 [Meriones unguiculatus].               |
| (19) | XP_012590780 | PREDICTED: NK-tumor recognition protein isoform X2 [Condylura cristata].       |
| (20) | XP_019274390 | PREDICTED: NK-tumor recognition protein isoform X5 [Panthera pardus].          |
| (21) | XP_019489071 | PREDICTED: NK-tumor recognition protein isoform X2 [Hipposideros armiger].     |
| (22) | XP_019489063 | PREDICTED: NK-tumor recognition protein isoform X1 [Hipposideros armiger].     |
| (23) | XP_010588206 | NK-tumor recognition protein isoform X5 [Loxodonta africana].                  |
| (24) | XP_023403600 | NK-tumor recognition protein isoform X4 [Loxodonta africana].                  |
| (25) | XP_009982730 | PREDICTED: NK-tumor recognition protein-like, partial [Tauraco erythrolophus]  |
| (26) | XP_019839655 | PREDICTED: NK-tumor recognition protein, partial [Bos indicus].                |
| (27) | XP_006512034 | PREDICTED: NK-tumor recognition protein isoform X1 [Mus musculus].             |
| (28) | XP_024100264 | NK-tumor recognition protein isoform X5 [Pongo abelii].                        |
| (29) | XP_019666422 | NK-tumor recognition protein isoform X3 [Felis catus].                         |
| (30) | XP_008530962 | PREDICTED: NK-tumor recognition protein isoform X1 [Equus przewalskii].        |
| (31) | XP_008530967 | PREDICTED: NK-tumor recognition protein isoform X6 [Equus przewalskii].        |
| (32) | XP_010944204 | PREDICTED: NK-tumor recognition protein isoform X2 [Camelus bactrianus].       |
| (33) | XP_015091830 | PREDICTED: NK-tumor recognition protein isoform X3 [Vicugna pacos].            |
| (34) | XP_014411884 | PREDICTED: NK-tumor recognition protein isoform X2 [Camelus ferus].            |
| (35) | XP_010944201 | PREDICTED: NK-tumor recognition protein isoform X1 [Camelus bactrianus].       |
| (36) | XP_009443554 | PREDICTED: NK-tumor recognition protein isoform X4 [Pan troglodytes].          |
| (37) | XP_021241242 | NK-tumor recognition protein isoform X6 [Numida meleagris].                    |
| (38) | XP_020927360 | NK-tumor recognition protein isoform X5 [Sus scrofa].                          |
| (39) | XP_004581770 | PREDICTED: NK-tumor recognition protein [Ochotona princeps].                   |
| (40) | XP_005669469 | NK-tumor recognition protein isoform X4 [Sus scrofa].                          |

( 41) XP\_009443555 PREDICTED: NK-tumor recognition protein isoform X5 [Pan troglodytes].

( 42) XP\_005669468 NK-tumor recognition protein isoform X3 [Sus scrofa].

( 43) XP\_008708042 PREDICTED: LOW QUALITY PROTEIN: NK-tumor recognition protein [Ursus maritimus

( 44) AAA37500 cyclophilin-related protein [Mus musculus domesticus].

( 45) XP\_004676331 PREDICTED: NK-tumor recognition protein isoform X1 [Condylura cristata].

( 46) XP\_006748020 PREDICTED: NK-tumor recognition protein [Leptonychotes weddellii].

( 47) XP\_006770577 PREDICTED: NK-tumor recognition protein isoform X4 [Myotis davidii].

( 48) XP\_019583095 PREDICTED: NK-tumor recognition protein isoform X4 [Rhinolophus sinicus].

( 49) XP\_015423867 PREDICTED: NK-tumor recognition protein isoform X3 [Myotis davidii].

( 50) XP\_005383594 PREDICTED: NK-tumor recognition protein isoform X1 [Chinchilla lanigera].

( 51) XP\_019583089 PREDICTED: NK-tumor recognition protein isoform X1 [Rhinolophus sinicus].

( 52) XP\_014445953 PREDICTED: NK-tumor recognition protein [Tupaia chinensis].

( 53) XP\_005891140 PREDICTED: NK-tumor recognition protein [Bos mutus].

( 54) XP\_019489104 PREDICTED: NK-tumor recognition protein isoform X4 [Hipposideros armiger].

( 55) XP\_012004520 PREDICTED: NK-tumor recognition protein isoform X2 [Ovis aries musimon].

( 56) XP\_006051863 PREDICTED: NK-tumor recognition protein isoform X4 [Bubalus bubalis].

( 57) XP\_005954297 PREDICTED: NK-tumor recognition protein [Pantholops hodgsonii].

( 58) XP\_005695639 PREDICTED: NK-tumor recognition protein isoform X2 [Capra hircus].

( 59) XP\_011954828 PREDICTED: NK-tumor recognition protein isoform X2 [Ovis aries].

( 60) XP\_003992255 NK-tumor recognition protein isoform X2 [Felis catus].

( 61) XP\_002702773 PREDICTED: NK-tumor recognition protein isoform X2 [Bos taurus].

( 62) XP\_019666421 NK-tumor recognition protein isoform X1 [Felis catus].

( 63) XP\_019489077 PREDICTED: NK-tumor recognition protein isoform X3 [Hipposideros armiger].

( 64) XP\_012004518 PREDICTED: NK-tumor recognition protein isoform X1 [Ovis aries musimon].

( 65) XP\_011954826 PREDICTED: NK-tumor recognition protein isoform X1 [Ovis aries].

( 66) XP\_006051860 PREDICTED: NK-tumor recognition protein isoform X1 [Bubalus bubalis].

( 67) XP\_005695638 PREDICTED: NK-tumor recognition protein isoform X1 [Capra hircus].

( 68) XP\_005196454 PREDICTED: NK-tumor recognition protein isoform X1 [Bos taurus].

( 69) XP\_851976 NK-tumor recognition protein isoform X2 [Canis lupus familiaris].

( 70) XP\_012520957 PREDICTED: NK-tumor recognition protein [Propithecus coquereli].

( 71) XP\_005634360 NK-tumor recognition protein isoform X1 [Propithecus coquereli].

( 72) XP\_003132182 NK-tumor recognition protein isoform X2 [Canis lupus familiaris].

( 73) XP\_020139644 NK-tumor recognition protein isoform X2 [Sus scrofa].

( 74) XP\_014715584 NK-tumor recognition protein isoform X3 [Microcebus murinus].

( 75) XP\_007193513 PREDICTED: NK-tumor recognition protein isoform X3 [Eguus asinus].

( 76) XP\_005669463 PREDICTED: NK-tumor recognition protein isoform X4 [Balaenoptera acutorostrat

( 77) XP\_004419619 NK-tumor recognition protein isoform X1 [Sus scrofa].

( 78) XP\_003363180 PREDICTED: NK-tumor recognition protein isoform X3 [Ceratotherium simum simum

( 79) XP\_014986734 NK-tumor recognition protein isoform X6 [Eguus caballus].

( 80) XP\_014715581 PREDICTED: NK-tumor recognition protein isoform X3 [Macaca mulatta].

( 81) XP\_014646446 PREDICTED: NK-tumor recognition protein isoform X1 [Eguus asinus].

( 82) XP\_006893048 PREDICTED: NK-tumor recognition protein isoform X2 [Ceratotherium simum simum

PREDICTED: LOW QUALITY PROTEIN: NK-tumor recognition protein [Elephantulus ed

|       |              |                                                                               |
|-------|--------------|-------------------------------------------------------------------------------|
| ( 83) | XP_012625718 | NK-tumor recognition protein isoform X8 [Microcebus murinus].                 |
| ( 84) | XP_010973061 | PREDICTED: NK-tumor recognition protein isoform X2 [Camelus dromedarius].     |
| ( 85) | XP_010944206 | PREDICTED: NK-tumor recognition protein isoform X3 [Camelus bactrianus].      |
| ( 86) | XP_007193512 | PREDICTED: NK-tumor recognition protein isoform X3 [Balaenoptera acutorostrat |
| ( 87) | XP_015091829 | PREDICTED: NK-tumor recognition protein isoform X1 [Vicugna pacos].           |
| ( 88) | XP_014411882 | PREDICTED: NK-tumor recognition protein isoform X1 [Camelus ferus].           |
| ( 89) | XP_006770574 | PREDICTED: NK-tumor recognition protein isoform X2 [Myotis davidii].          |
| ( 90) | XP_006770573 | PREDICTED: NK-tumor recognition protein isoform X1 [Myotis davidii].          |
| ( 91) | XP_003809334 | PREDICTED: LOW QUALITY PROTEIN: NK-tumor recognition protein [Pan paniscus].  |
| ( 92) | ELK25111     | NK-tumor recognition protein [Myotis davidii].                                |
| ( 93) | XP_023087260 | NK-tumor recognition protein isoform X3 [Ptilocolobus tephrosceles].          |
| ( 94) | XP_005546833 | PREDICTED: NK-tumor recognition protein isoform X2 [Macaca fascicularis].     |
| ( 95) | XP_008258471 | PREDICTED: NK-tumor recognition protein isoform X3 [Oryctolagus cuniculus].   |
| ( 96) | XP_008258470 | PREDICTED: NK-tumor recognition protein isoform X2 [Oryctolagus cuniculus].   |
| ( 97) | XP_004708608 | PREDICTED: NK-tumor recognition protein [Echinops telfairi].                  |
| ( 98) | XP_003309783 | PREDICTED: NK-tumor recognition protein isoform X1 [Pan troglodytes].         |
| ( 99) | XP_009443557 | PREDICTED: NK-tumor recognition protein isoform X6 [Pan troglodytes].         |
| (100) | XP_011889503 | PREDICTED: NK-tumor recognition protein isoform X7 [Cercopithecus atys].      |
| (101) | XP_019274386 | PREDICTED: NK-tumor recognition protein isoform X3 [Panthera pardus].         |
| (102) | XP_015392541 | PREDICTED: NK-tumor recognition protein isoform X3 [Panthera tigris altaica]. |
| (103) | XP_021573498 | NK-tumor recognition protein [Carrito syrichta].                              |
| (104) | XP_017396461 | PREDICTED: NK-tumor recognition protein isoform X4 [Cebus capucinus imitator] |
| (105) | XP_005546834 | PREDICTED: NK-tumor recognition protein isoform X3 [Macaca fascicularis].     |
| (106) | XP_014986732 | PREDICTED: NK-tumor recognition protein isoform X1 [Macaca mulatta].          |
| (107) | XP_018879079 | PREDICTED: NK-tumor recognition protein isoform X3 [Gorilla gorilla gorilla]. |
| (108) | XP_014986735 | PREDICTED: NK-tumor recognition protein isoform X4 [Macaca mulatta].          |
| (109) | XP_009443553 | PREDICTED: NK-tumor recognition protein isoform X3 [Pan troglodytes].         |
| (110) | XP_016861963 | PREDICTED: NK-tumor recognition protein isoform X3 [Homo sapiens].            |
| (111) | XP_011839703 | PREDICTED: NK-tumor recognition protein [Mandrillus leucophaeus].             |
| (112) | XP_006713234 | PREDICTED: NK-tumor recognition protein isoform X2 [Homo sapiens].            |
| (113) | XP_017396460 | PREDICTED: NK-tumor recognition protein isoform X3 [Cebus capucinus imitator] |
| (114) | XP_018879080 | PREDICTED: NK-tumor recognition protein isoform X4 [Gorilla gorilla gorilla]. |
| (115) | XP_010372621 | PREDICTED: NK-tumor recognition protein isoform X3 [Rhinopithecus roxellana]. |
| (116) | XP_007981992 | PREDICTED: NK-tumor recognition protein isoform X3 [Chlorocebus sabaeus].     |
| (117) | XP_009199351 | NK-tumor recognition protein isoform X2 [Papio anubis].                       |
| (118) | PNJ74565     | NKTR isoform 5 [Pongo abelii].                                                |
| (119) | XP_023087259 | NK-tumor recognition protein isoform X2 [Ptilocolobus tephrosceles].          |
| (120) | XP_009237437 | NK-tumor recognition protein isoform X3 [Pongo abelii].                       |
| (121) | XP_023087256 | NK-tumor recognition protein isoform X1 [Ptilocolobus tephrosceles].          |
| (122) | XP_010372620 | PREDICTED: NK-tumor recognition protein isoform X2 [Rhinopithecus roxellana]. |
| (123) | XP_004414069 | PREDICTED: NK-tumor recognition protein isoform X1 [Odobenus rosmarus diverge |
| (124) | XP_011231109 | PREDICTED: NK-tumor recognition protein isoform X2 [Ailuropoda melanoleuca].  |

(125) XP\_015392540 PREDICTED: NK-tumor recognition protein isoform X2 [Panthera tigris altaica].  
 (126) XP\_011231110 PREDICTED: NK-tumor recognition protein isoform X1 [Ailuropoda melanoleuca].  
 (127) XP\_015392538 PREDICTED: NK-tumor recognition protein isoform X1 [Panthera tigris altaica].  
 (128) XP\_004754311 PREDICTED: NK-tumor recognition protein isoform X1 [Mustela putorius furo].  
 (129) XP\_011806342 PREDICTED: NK-tumor recognition protein isoform X1 [Macaca fascicularis].  
 (130) XP\_005546832 PREDICTED: NK-tumor recognition protein isoform X4 [Macaca fascicularis].  
 (131) XP\_005546835 PREDICTED: NK-tumor recognition protein isoform X4 [Pteropus vampyrus].  
 (132) XP\_023384831 PREDICTED: NK-tumor recognition protein isoform X3 [Pteropus alecto].  
 (133) XP\_015447191 PREDICTED: NK-tumor recognition protein [Chrysochloris asiatica].  
 (134) XP\_006868826 NK-tumor recognition protein isoform X4 [Myotis lucifugus].  
 (135) XP\_006102363 PREDICTED: NK-tumor recognition protein isoform X4 [Myotis brandtii].  
 (136) XP\_005860445 PREDICTED: NK-tumor recognition protein isoform X2 [Panthera pardus].  
 (137) XP\_019274385 NK-tumor recognition protein isoform X3 [Myotis lucifugus].  
 (138) XP\_014323127 PREDICTED: NK-tumor recognition protein isoform X3 [Myotis brandtii].  
 (139) XP\_005860444 PREDICTED: NK-tumor recognition protein isoform X4 [Physeter catodon].  
 (140) XP\_023988067 PREDICTED: NK-tumor recognition protein isoform X1 [Panthera pardus].  
 (141) XP\_019274384 PREDICTED: NK-tumor recognition protein isoform X2 [Cebus capucinus imitator].  
 (142) XP\_017396459 PREDICTED: NK-tumor recognition protein [Eptesicus fuscus].  
 (143) XP\_008152845 NK-tumor recognition protein isoform c [Homo sapiens].  
 (144) NP\_001336053 NK-tumor recognition protein isoform X3 [Physeter catodon].  
 (145) XP\_007106821 PREDICTED: NK-tumor recognition protein isoform X2 [Gorilla gorilla gorilla].  
 (146) XP\_018879078 PREDICTED: NK-tumor recognition protein isoform X1 [Cebus capucinus imitator].  
 (147) XP\_017396458 NK-tumor recognition protein isoform X7 [Aotus nancymae].  
 (148) XP\_012315533 PREDICTED: NK-tumor recognition protein isoform X2 [Chlorocebus sabaeus].  
 (149) XP\_007981991 PREDICTED: LOW QUALITY PROTEIN: NK-tumor recognition protein [Nomascus leucog].  
 (150) XP\_003256959 PREDICTED: NK-tumor recognition protein isoform X3 [Callithrix jacchus].  
 (151) XP\_003735136 PREDICTED: NK-tumor recognition protein isoform X4 [Tursiops truncatus].  
 (152) XP\_019802415 PREDICTED: NK-tumor recognition protein isoform X1 [Gorilla gorilla gorilla].  
 (153) XP\_018879076 PREDICTED: NK-tumor recognition protein isoform X6 [Aotus nancymae].  
 (154) XP\_012315532 PREDICTED: LOW QUALITY PROTEIN: NK-tumor recognition protein [Macaca nemestrina].  
 (155) XP\_011737181 PREDICTED: NK-tumor recognition protein isoform X6 [Cercopithecus atys].  
 (156) XP\_011889502 PREDICTED: NK-tumor recognition protein isoform X1 [Rhinopithecus roxellana].  
 (157) XP\_010372619 PREDICTED: NK-tumor recognition protein isoform X1 [Chlorocebus sabaeus].  
 (158) XP\_007981990 PREDICTED: NK-tumor recognition protein [Orcinus orca].  
 (159) XP\_004277919 NK-tumor recognition protein isoform X1 [Papio anubis].  
 (160) XP\_003894654 PREDICTED: NK-tumor recognition protein isoform X1 [Tursiops truncatus].  
 (161) XP\_019802412 NK-tumor recognition protein isoform X3 [Papio anubis].  
 (162) XP\_017811031 PREDICTED: NK-tumor recognition protein isoform X8 [Callithrix jacchus].  
 (163) XP\_008982345 NK-tumor recognition protein isoform X2 [Cavia porcellus].  
 (164) XP\_003477052 NK-tumor recognition protein isoform X1 [Cavia porcellus].  
 (165) XP\_013015643 PREDICTED: NK-tumor recognition protein isoform X3 [Monodelphis domestica].  
 (166) XP\_007499863

|       |              |                                         |                                       |
|-------|--------------|-----------------------------------------|---------------------------------------|
| (167) | XP_023581750 | NK-tumor recognition protein isoform X1 | [Trichechus manatus latirostris].     |
| (168) | XP_002813940 | NK-tumor recognition protein isoform X2 | [Pongo abelii].                       |
| (169) | XP_014390380 | PREDICTED: NK-tumor recognition protein | isoform X2 [Myotis brandtii].         |
| (170) | XP_014323126 | NK-tumor recognition protein isoform X2 | [Myotis lucifugus].                   |
| (171) | XP_024100262 | NK-tumor recognition protein isoform X1 | [Pongo abelii].                       |
| (172) | XP_022409524 | NK-tumor recognition protein isoform X4 | [Delphinapterus leucas].              |
| (173) | XP_022409523 | NK-tumor recognition protein isoform X3 | [Delphinapterus leucas].              |
| (174) | XP_019802414 | PREDICTED: NK-tumor recognition protein | isoform X3 [Tursiops truncatus].      |
| (175) | XP_021062318 | NK-tumor recognition protein isoform X1 | [Mus pahari].                         |
| (176) | XP_014390377 | PREDICTED: NK-tumor recognition protein | isoform X1 [Myotis brandtii].         |
| (177) | XP_014323123 | NK-tumor recognition protein isoform X1 | [Myotis lucifugus].                   |
| (178) | XP_011889501 | PREDICTED: NK-tumor recognition protein | isoform X5 [Cercopithecus atys].      |
| (179) | XP_015344917 | PREDICTED: NK-tumor recognition protein | isoform X3 [Marmota marmota marmota]. |
| (180) | XP_011889500 | PREDICTED: NK-tumor recognition protein | isoform X4 [Cercopithecus atys].      |
| (181) | XP_016018800 | PREDICTED: NK-tumor recognition protein | isoform X6 [Rousettus aegyptiacus].   |
| (182) | XP_019802413 | PREDICTED: NK-tumor recognition protein | isoform X2 [Tursiops truncatus].      |
| (183) | XP_023581752 | NK-tumor recognition protein isoform X2 | [Trichechus manatus latirostris].     |
| (184) | XP_008847679 | PREDICTED: NK-tumor recognition protein | isoform X3 [Nannospalax galili].      |
| (185) | XP_016018799 | PREDICTED: NK-tumor recognition protein | isoform X5 [Rousettus aegyptiacus].   |
| (186) | XP_016018798 | PREDICTED: NK-tumor recognition protein | isoform X4 [Rousettus aegyptiacus].   |
| (187) | XP_017497112 | PREDICTED: NK-tumor recognition protein | isoform X3 [Manis javanica].          |
| (188) | XP_023371677 | NK-tumor recognition protein isoform X3 | [Oryzomys garrattii].                 |
| (189) | XP_007947878 | PREDICTED: NK-tumor recognition protein | [Oryzomys afer afer].                 |
| (190) | XP_007445750 | PREDICTED: NK-tumor recognition protein | [Lipotes vexillifer].                 |
| (191) | XP_011889497 | PREDICTED: NK-tumor recognition protein | isoform X1 [Cercopithecus atys].      |
| (192) | XP_020854834 | NK-tumor recognition protein isoform X2 | [Phascogaleos cinereus].              |
| (193) | XP_012315531 | NK-tumor recognition protein isoform X5 | [Aotus nancymae].                     |
| (194) | XP_020854833 | NK-tumor recognition protein isoform X1 | [Phascogaleos cinereus].              |
| (195) | XP_012315530 | NK-tumor recognition protein isoform X4 | [Aotus nancymae].                     |
| (196) | XP_022409521 | NK-tumor recognition protein isoform X1 | [Delphinapterus leucas].              |
| (197) | XP_023384830 | NK-tumor recognition protein isoform X3 | [Pteropus vampyrus].                  |
| (198) | XP_020041827 | NK-tumor recognition protein isoform X1 | [Castor canadensis].                  |
| (199) | XP_015344916 | PREDICTED: NK-tumor recognition protein | isoform X2 [Marmota marmota marmota]. |
| (200) | XP_008847678 | PREDICTED: NK-tumor recognition protein | isoform X2 [Nannospalax galili].      |
| (201) | XP_015344914 | PREDICTED: NK-tumor recognition protein | isoform X1 [Marmota marmota marmota]. |
| (202) | XP_008847677 | PREDICTED: NK-tumor recognition protein | isoform X1 [Nannospalax galili].      |
| (203) | XP_005337989 | NK-tumor recognition protein isoform X4 | [Ictidomys tridecemlineatus].         |
| (204) | XP_021590709 | NK-tumor recognition protein isoform X3 | [Ictidomys tridecemlineatus].         |
| (205) | XP_022409522 | NK-tumor recognition protein isoform X2 | [Delphinapterus leucas].              |
| (206) | XP_021590708 | NK-tumor recognition protein isoform X2 | [Ictidomys tridecemlineatus].         |
| (207) | XP_021027182 | NK-tumor recognition protein isoform X3 | [Mus caroli].                         |
| (208) | XP_006914886 | PREDICTED: NK-tumor recognition protein | isoform X2 [Pteropus alecto].         |

(209) XP\_011355685 NK-tumor recognition protein isoform X2 [Pteropus vampyrus].  
 (210) XP\_023384828 NK-tumor recognition protein isoform X1 [Pteropus vampyrus].  
 (211) XP\_006914885 PREDICTED: NK-tumor recognition protein isoform X1 [Pteropus alecto].  
 (212) XP\_012663507 NK-tumor recognition protein isoform X2 [Otolemur garnettii].  
 (213) XP\_012663506 NK-tumor recognition protein isoform X1 [Otolemur garnettii].  
 (214) XP\_017497113 PREDICTED: NK-tumor recognition protein isoform X4 [Manis javanica].  
 (215) XP\_016051563 PREDICTED: NK-tumor recognition protein isoform X1 [Miniopterus natalensis].  
 (216) XP\_017497111 PREDICTED: NK-tumor recognition protein isoform X2 [Manis javanica].  
 (217) XP\_017497110 PREDICTED: NK-tumor recognition protein isoform X1 [Manis javanica].  
 (218) XP\_012315529 NK-tumor recognition protein isoform X2 [Aotus nancymae].  
 (219) XP\_020728074 NK-tumor recognition protein isoform X2 [Odocoileus virginianus texanus].  
 (220) XP\_012315528 NK-tumor recognition protein isoform X1 [Aotus nancymae].  
 (221) XP\_020728073 NK-tumor recognition protein isoform X1 [Odocoileus virginianus texanus].  
 (222) XP\_021062319 NK-tumor recognition protein isoform X2 [Mus pahari].  
 (223) XP\_021027181 NK-tumor recognition protein isoform X2 [Mus caroli].  
 (224) XP\_021027180 NK-tumor recognition protein isoform X1 [Mus caroli].  
 (225) XP\_004835151 NK-tumor recognition protein isoform X2 [Heterocephalus glaber].  
 (226) XP\_012928271 NK-tumor recognition protein isoform X1 [Heterocephalus glaber].  
 (227) XP\_021590705 NK-tumor recognition protein isoform X1 [Ictidomys tridecemlineatus].  
 (228) XP\_011241241 PREDICTED: NK-tumor recognition protein isoform X2 [Mus musculus].  
 (229) NP\_035048 NK-tumor recognition protein [Mus musculus].  
 (230) XP\_017168694 PREDICTED: NK-tumor recognition protein isoform X4 [Mus musculus].  
 (231) XP\_005348185 PREDICTED: NK-tumor recognition protein isoform X1 [Microtus ochrogaster].  
 (232) XP\_005082370 NK-tumor recognition protein [Mesocricetus auratus].  
 (233) XP\_021503066 NK-tumor recognition protein isoform X5 [Meriones unguiculatus].  
 (234) XP\_021503065 NK-tumor recognition protein isoform X4 [Meriones unguiculatus].  
 (235) XP\_021503062 NK-tumor recognition protein isoform X1 [Meriones unguiculatus].  
 (236) XP\_021503063 NK-tumor recognition protein isoform X2 [Meriones unguiculatus].  
 (237) XP\_008568057 PREDICTED: NK-tumor recognition protein isoform X2 [Galeopterus variegatus].  
 (238) XP\_008568056 PREDICTED: NK-tumor recognition protein isoform X1 [Galeopterus variegatus].  
 (239) XP\_006120664 PREDICTED: NK-tumor recognition protein isoform X3 [Pelodiscus sinensis].  
 (240) XP\_007055629 PREDICTED: NK-tumor recognition protein [Chelonia mydas].  
 (241) XP\_006120661 PREDICTED: NK-tumor recognition protein isoform X1 [Pelodiscus sinensis].  
 (242) XP\_006120659 PREDICTED: NK-tumor recognition protein isoform X5 [Pelodiscus sinensis].  
 (243) XP\_007106819 NK-tumor recognition protein isoform X1 [Physeter catodon].  
 (244) XP\_015708506 PREDICTED: NK-tumor recognition protein isoform X1 [Coturnix japonica].  
 (245) XP\_009682494 PREDICTED: NK-tumor recognition protein isoform X4 [Struthio camelus australi].  
 (246) XP\_009682493 PREDICTED: NK-tumor recognition protein isoform X3 [Struthio camelus australi].  
 (247) XP\_009682492 PREDICTED: NK-tumor recognition protein isoform X2 [Struthio camelus australi].  
 (248) XP\_009682491 PREDICTED: NK-tumor recognition protein isoform X1 [Struthio camelus australi].  
 (249) XP\_019471734 PREDICTED: NK-tumor recognition protein isoform X5 [Meleagris gallopavo].  
 (250) XP\_010710549 PREDICTED: NK-tumor recognition protein isoform X2 [Meleagris gallopavo].

|       |              |                                                                               |
|-------|--------------|-------------------------------------------------------------------------------|
| (251) | XP_010710548 | PREDICTED: NK-tumor recognition protein isoform X1 [Meleagris gallopavo].     |
| (252) | XP_015136632 | PREDICTED: NK-tumor recognition protein isoform X7 [Gallus gallus].           |
| (253) | XP_004939132 | PREDICTED: NK-tumor recognition protein isoform X2 [Gallus gallus].           |
| (254) | XP_004939131 | PREDICTED: NK-tumor recognition protein isoform X1 [Gallus gallus].           |
| (255) | XP_013795593 | PREDICTED: NK-tumor recognition protein [Apteryx australis mantelli].         |
| (256) | XP_019363610 | PREDICTED: NK-tumor recognition protein isoform X1 [Gavialis gangeticus].     |
| (257) | XP_014376468 | PREDICTED: LOW QUALITY PROTEIN: NK-tumor recognition protein [Alligator sinen |
| (258) | XP_007659513 | PREDICTED: NK-tumor recognition protein isoform X1 [Ornithorhynchus anatinus] |
| (259) | XP_021241246 | NK-tumor recognition protein isoform X9 [Numida meleagris].                   |
| (260) | XP_021241236 | NK-tumor recognition protein isoform X2 [Numida meleagris].                   |
| (261) | XP_021241235 | NK-tumor recognition protein isoform X1 [Numida meleagris].                   |
| (262) | XP_017731869 | PREDICTED: LOW QUALITY PROTEIN: NK-tumor recognition protein [Rhinopithecus b |
| (263) | XP_012426793 | PREDICTED: NK-tumor recognition protein [Taeniopygia guttata].                |
| (264) | XP_017944741 | PREDICTED: NK-tumor recognition protein isoform X6 [Manacus vitellinus].      |
| (265) | XP_017944740 | PREDICTED: NK-tumor recognition protein isoform X5 [Manacus vitellinus].      |
| (266) | XP_010393085 | NK-tumor recognition protein isoform X6 [Corvus cornix cornix].               |
| (267) | XP_017685518 | PREDICTED: NK-tumor recognition protein isoform X5 [Lepidothrix coronata].    |
| (268) | XP_017602246 | PREDICTED: NK-tumor recognition protein isoform X6 [Corvus brachyrhynchos].   |
| (269) | XP_016151723 | PREDICTED: NK-tumor recognition protein isoform X4 [Ficedula albicollis].     |
| (270) | XP_019138709 | NK-tumor recognition protein isoform X5 [Corvus cornix cornix].               |
| (271) | XP_017685517 | PREDICTED: NK-tumor recognition protein isoform X4 [Lepidothrix coronata].    |
| (272) | XP_017602245 | PREDICTED: NK-tumor recognition protein isoform X5 [Corvus brachyrhynchos].   |
| (273) | XP_005040539 | PREDICTED: NK-tumor recognition protein isoform X3 [Ficedula albicollis].     |
| (274) | XP_005040538 | PREDICTED: NK-tumor recognition protein isoform X2 [Ficedula albicollis].     |
| (275) | XP_005040537 | PREDICTED: NK-tumor recognition protein isoform X1 [Ficedula albicollis].     |
| (276) | XP_014800495 | PREDICTED: NK-tumor recognition protein isoform X5 [Calidris pugnax].         |
| (277) | XP_008168983 | NK-tumor recognition protein isoform X3 [Chrysemys picta bellii].             |
| (278) | XP_017944739 | PREDICTED: NK-tumor recognition protein isoform X4 [Manacus vitellinus].      |
| (279) | XP_014729203 | PREDICTED: NK-tumor recognition protein isoform X4 [Sturnus vulgaris].        |
| (280) | XP_017944736 | PREDICTED: NK-tumor recognition protein isoform X2 [Manacus vitellinus].      |
| (281) | XP_014729201 | PREDICTED: NK-tumor recognition protein isoform X2 [Sturnus vulgaris].        |
| (282) | XP_010393084 | NK-tumor recognition protein isoform X4 [Corvus cornix cornix].               |
| (283) | XP_017944735 | PREDICTED: NK-tumor recognition protein isoform X1 [Manacus vitellinus].      |
| (284) | XP_017685520 | PREDICTED: NK-tumor recognition protein isoform X7 [Lepidothrix coronata].    |
| (285) | XP_017602244 | PREDICTED: NK-tumor recognition protein isoform X4 [Corvus brachyrhynchos].   |
| (286) | XP_014729200 | PREDICTED: NK-tumor recognition protein isoform X1 [Sturnus vulgaris].        |
| (287) | XP_010393082 | NK-tumor recognition protein isoform X2 [Corvus cornix cornix].               |
| (288) | XP_017685515 | PREDICTED: NK-tumor recognition protein isoform X2 [Lepidothrix coronata].    |
| (289) | XP_017602242 | PREDICTED: NK-tumor recognition protein isoform X3 [Corvus brachyrhynchos].   |
| (290) | XP_017602241 | PREDICTED: NK-tumor recognition protein isoform X2 [Corvus brachyrhynchos].   |
| (291) | KFP58102     | NK-tumor recognition protein [Cariama cristata].                              |
| (292) | XP_010393081 | NK-tumor recognition protein isoform X1 [Corvus cornix cornix].               |

(293) XP\_017685514 PREDICTED: NK-tumor recognition protein isoform X1 [Lepidothrix coronata].

(294) XP\_017602240 PREDICTED: NK-tumor recognition protein isoform X1 [Corvus brachyrhynchos].

(295) XP\_010559721 PREDICTED: NK-tumor recognition protein isoform X2 [Haliaeetus leucocephalus]

(296) XP\_014800494 PREDICTED: NK-tumor recognition protein isoform X4 [Calidris pugnax].

(297) XP\_011571332 PREDICTED: NK-tumor recognition protein isoform X2 [Aquila chrysaetos canadensis]

(298) XP\_010559712 PREDICTED: NK-tumor recognition protein isoform X1 [Haliaeetus leucocephalus]

(299) XP\_009331567 PREDICTED: NK-tumor recognition protein isoform X2 [Pygoscelis adeliae].

(300) XP\_008492672 PREDICTED: NK-tumor recognition protein [Calypte anna].

(301) XP\_014800492 PREDICTED: NK-tumor recognition protein isoform X2 [Calidris pugnax].

(302) XP\_011571324 PREDICTED: NK-tumor recognition protein isoform X1 [Aquila chrysaetos canadensis]

(303) XP\_009697766 PREDICTED: NK-tumor recognition protein [Carriama cristata].

(304) XP\_009331566 PREDICTED: NK-tumor recognition protein isoform X1 [Pygoscelis adeliae].

(305) XP\_009274213 PREDICTED: NK-tumor recognition protein isoform X1 [Aptenodytes forsteri].

(306) XP\_014800491 PREDICTED: NK-tumor recognition protein isoform X1 [Calidris pugnax].

(307) XP\_010301634 PREDICTED: NK-tumor recognition protein [Balearica regulorum gibbericeps].

(308) XP\_008168980 PREDICTED: NK-tumor recognition protein isoform X2 [Chrysemys picta bellii].

(309) XP\_023963187 PREDICTED: NK-tumor recognition protein isoform X1 [Chrysemys picta bellii].

(310) XP\_005150066 PREDICTED: LOW QUALITY PROTEIN: NK-tumor recognition protein [Melospiza uropygialis].

(311) XP\_009473612 PREDICTED: LOW QUALITY PROTEIN: NK-tumor recognition protein [Nipponia nippon]

(312) XP\_021393646 PREDICTED: NK-tumor recognition protein isoform X6 [Lonchura striata domestica].

(313) XP\_021393642 PREDICTED: NK-tumor recognition protein isoform X2 [Lonchura striata domestica].

(314) XP\_021393643 PREDICTED: NK-tumor recognition protein isoform X3 [Lonchura striata domestica].

(315) XP\_009878793 PREDICTED: LOW QUALITY PROTEIN: NK-tumor recognition protein [Charadrius vociferans]

(316) XP\_021393641 PREDICTED: NK-tumor recognition protein isoform X1 [Lonchura striata domestica].

(317) XP\_018764676 PREDICTED: NK-tumor recognition protein isoform X4 [Serinus canaria].

(318) XP\_018764674 PREDICTED: NK-tumor recognition protein isoform X2 [Serinus canaria].

(319) XP\_018764673 PREDICTED: NK-tumor recognition protein isoform X1 [Serinus canaria].

(320) KFV02250 PREDICTED: NK-tumor recognition protein [Pterocles gutturalis].

(321) XP\_014125627 PREDICTED: NK-tumor recognition protein isoform X3 [Zonotrichia albicollis].

(322) XP\_010083448 PREDICTED: NK-tumor recognition protein [Pterocles gutturalis].

(323) XP\_014125626 PREDICTED: NK-tumor recognition protein isoform X2 [Zonotrichia albicollis].

(324) XP\_014112250 PREDICTED: NK-tumor recognition protein isoform X3 [Pseudopodoces humilis].

(325) XP\_014112249 PREDICTED: NK-tumor recognition protein isoform X2 [Pseudopodoces humilis].

(326) XP\_014125625 PREDICTED: NK-tumor recognition protein isoform X1 [Zonotrichia albicollis].

(327) XP\_014112248 PREDICTED: NK-tumor recognition protein isoform X1 [Pseudopodoces humilis].

(328) XP\_005428264 PREDICTED: NK-tumor recognition protein [Geospiza fortis].

(329) XP\_015474510 PREDICTED: NK-tumor recognition protein isoform X4 [Parus major].

(330) XP\_023777798 PREDICTED: NK-tumor recognition protein isoform X4 [Cyanistes caeruleus].

(331) XP\_015474508 PREDICTED: NK-tumor recognition protein isoform X2 [Parus major].

(332) XP\_023777797 PREDICTED: NK-tumor recognition protein isoform X3 [Cyanistes caeruleus].

(333) XP\_023777796 PREDICTED: NK-tumor recognition protein isoform X2 [Cyanistes caeruleus].

(334) XP\_015474507 PREDICTED: NK-tumor recognition protein isoform X1 [Parus major].



(335) XP\_023777795 NK-tumor recognition protein isoform X1 [Cyanistes caeruleus].  
 (336) KFQ42818 NK-tumor recognition protein [Nestor notabilis].  
 (337) XP\_019355067 PREDICTED: NK-tumor recognition protein isoform X1 [Alligator mississippiensis]  
 (338) XP\_010014722 PREDICTED: LOW QUALITY PROTEIN: NK-tumor recognition protein [Nestor notabilis]  
 (339) XP\_009556564 PREDICTED: NK-tumor recognition protein [Cuculus canorus].  
 (340) XP\_009993002 PREDICTED: NK-tumor recognition protein [Chaetura pelagica].  
 (341) XP\_009896433 PREDICTED: NK-tumor recognition protein [Picroides pubescens].  
 (342) XP\_010213065 PREDICTED: NK-tumor recognition protein [Tinamus guttatus].  
 (343) XP\_019384731 PREDICTED: NK-tumor recognition protein isoform X1 [Crocodylus porosus].  
 (344) XP\_008110438 PREDICTED: NK-tumor recognition protein isoform X2 [Anolis carolinensis].  
 (345) XP\_008110436 PREDICTED: NK-tumor recognition protein isoform X1 [Anolis carolinensis].  
 (346) XP\_015264278 PREDICTED: NK-tumor recognition protein [Gekko japonicus].  
 (347) XP\_013917336 PREDICTED: NK-tumor recognition protein [Thamnophis sirtalis].  
 (348) XP\_020670421 NK-tumor recognition protein isoform X2 [Pogona vitticeps].  
 (349) XP\_020670420 PREDICTED: LOW QUALITY PROTEIN: NK-tumor recognition protein [Protobothrops m  
 (350) XP\_015667896 PREDICTED: NK-tumor recognition protein isoform X2 [Python bivittatus].  
 (351) XP\_007443413 PREDICTED: NK-tumor recognition protein isoform X1 [Python bivittatus].  
 (352) XP\_007443411 PREDICTED: NK-tumor recognition protein isoform X1 [Python bivittatus].  
 (353) XP\_017451684 PREDICTED: NK-tumor recognition protein isoform X1, partial [Rattus norvegicu  
 (354) XP\_014918330 PREDICTED: NK-tumor recognition protein [Acinonyx jubatus].  
 (355) XP\_002939352 PREDICTED: NK-tumor recognition protein isoform X1 [Xenopus tropicalis].  
 (356) XP\_018124467 PREDICTED: NK-tumor recognition protein-like isoform X1 [Xenopus laevis].  
 (357) XP\_017572959 PREDICTED: NK-tumor recognition protein isoform X1 [Pygocentrus nattereri].  
 (358) XP\_018607018 PREDICTED: NK-tumor recognition protein isoform X2 [Scleropages formosus].  
 (359) XP\_018607016 PREDICTED: NK-tumor recognition protein isoform X1 [Scleropages formosus].  
 (360) XP\_007544596 PREDICTED: NK-tumor recognition protein-like [Poecilia formosa].  
 (361) XP\_018607022 PREDICTED: NK-tumor recognition protein isoform X4 [Scleropages formosus].  
 (362) XP\_009443552 PREDICTED: NK-tumor recognition protein isoform X2 [Pan troglodytes].  
 (363) PNJ74568 NKTR isoform 8 [Pongo abelii].  
 (364) PNJ74566 NKTR isoform 6 [Pongo abelii].  
 (365) XP\_018122561 PREDICTED: NK-tumor recognition protein-like isoform X1 [Xenopus laevis].  
 (366) XP\_012735608 NK-tumor recognition protein isoform X1 [Fundulus heteroclitus].  
 (367) XP\_022065410 NK-tumor recognition protein isoform X6 [Acanthochromis polyacanthus].  
 (368) XP\_023122049 NK-tumor recognition protein isoform X6 [Amphiprion ocellaris].  
 (369) XP\_022065408 NK-tumor recognition protein isoform X4 [Acanthochromis polyacanthus].  
 (370) XP\_023122045 NK-tumor recognition protein isoform X3 [Amphiprion ocellaris].  
 (371) XP\_022065407 NK-tumor recognition protein isoform X3 [Acanthochromis polyacanthus].  
 (372) XP\_022065406 NK-tumor recognition protein isoform X2 [Acanthochromis polyacanthus].  
 (373) XP\_023122044 NK-tumor recognition protein isoform X2 [Amphiprion ocellaris].  
 (374) XP\_022065405 NK-tumor recognition protein isoform X1 [Acanthochromis polyacanthus].  
 (375) XP\_023122043 NK-tumor recognition protein isoform X1 [Amphiprion ocellaris].  
 (376) XP\_018414151 PREDICTED: NK-tumor recognition protein [Nanorana parkeri].

(377) XP\_023490562 NK-tumor recognition protein-like isoform X3 [Equus caballus].  
 (378) XP\_008304546 PREDICTED: NK-tumor recognition protein isoform X2 [Stegastes partitus].  
 (379) KKF16876 NK-tumor recognition protein [Larimichthys crocea].  
 (380) XP\_008304545 PREDICTED: NK-tumor recognition protein isoform X1 [Stegastes partitus].  
 (381) XP\_015249666 PREDICTED: NK-tumor recognition protein isoform X1 [Cyprinodon variegatus].  
 (382) XP\_018529332 PREDICTED: NK-tumor recognition protein isoform X2 [Lates calcarifer].  
 (383) XP\_018529331 PREDICTED: NK-tumor recognition protein isoform X1 [Lates calcarifer].  
 (384) XP\_010751380 PREDICTED: NK-tumor recognition protein isoform X3 [Larimichthys crocea].  
 (385) XP\_010751371 PREDICTED: NK-tumor recognition protein isoform X2 [Larimichthys crocea].  
 (386) XP\_019745550 PREDICTED: NK-tumor recognition protein isoform X2 [Hippocampus comes].  
 (387) XP\_010751365 PREDICTED: NK-tumor recognition protein isoform X1 [Larimichthys crocea].  
 (388) XP\_019745545 PREDICTED: NK-tumor recognition protein isoform X1 [Hippocampus comes].  
 (389) XP\_023263705 NK-tumor recognition protein isoform X1 [Seriola lalandi dorsalis].  
 (390) XP\_023263706 NK-tumor recognition protein isoform X2 [Seriola lalandi dorsalis].  
 (391) XP\_001338072 NK-tumor recognition protein isoform X1 [Danio rerio].  
 (392) XP\_022599954 NK-tumor recognition protein isoform X2 [Seriola dumerili].  
 (393) XP\_019897364 PREDICTED: NK-tumor recognition protein isoform X6 [Esox lucius].  
 (394) XP\_010900666 PREDICTED: NK-tumor recognition protein isoform X4 [Esox lucius].  
 (395) XP\_010900665 PREDICTED: NK-tumor recognition protein isoform X3 [Esox lucius].  
 (396) XP\_010900664 PREDICTED: NK-tumor recognition protein isoform X2 [Esox lucius].  
 (397) XP\_019897363 PREDICTED: NK-tumor recognition protein isoform X1 [Esox lucius].  
 (398) XP\_010167755 PREDICTED: NK-tumor recognition protein-like, partial [Antrostomus carolinens].  
 (399) XP\_010900668 PREDICTED: NK-tumor recognition protein isoform X5 [Esox lucius].  
 (400) XP\_016427080 PREDICTED: NK-tumor recognition protein-like isoform X1 [Sinocyclocheilus rhi].  
 (401) XP\_016318510 PREDICTED: NK-tumor recognition protein-like isoform X1 [Sinocyclocheilus ans].  
 (402) XP\_015209664 PREDICTED: NK-tumor recognition protein isoform X2 [Lepisosteus oculatus].  
 (403) XP\_015209662 PREDICTED: NK-tumor recognition protein isoform X1 [Lepisosteus oculatus].  
 (404) XP\_015209665 PREDICTED: NK-tumor recognition protein isoform X3 [Lepisosteus oculatus].  
 (405) XP\_005912346 PREDICTED: NK-tumor recognition protein isoform X2 [Haplochromis burtoni].  
 (406) XP\_005722738 PREDICTED: NK-tumor recognition protein isoform X2 [Pundamilia nyererei].  
 (407) XP\_020457914 LOW QUALITY PROTEIN: NK-tumor recognition protein [Monopterus albus].  
 (408) XP\_013132609 PREDICTED: NK-tumor recognition protein isoform X2 [Oreochromis niloticus].  
 (409) XP\_004546791 NK-tumor recognition protein isoform X2 [Maylandia zebra].  
 (410) XP\_006795195 PREDICTED: NK-tumor recognition protein-like isoform X2 [Neolamprologus brich].  
 (411) XP\_005912345 PREDICTED: NK-tumor recognition protein isoform X1 [Haplochromis burtoni].  
 (412) XP\_005722737 PREDICTED: NK-tumor recognition protein isoform X1 [Pundamilia nyererei].  
 (413) XP\_021475699 NK-tumor recognition protein [Oncorhynchus mykiss].  
 (414) XP\_004546790 NK-tumor recognition protein isoform X1 [Maylandia zebra].  
 (415) XP\_003439241 PREDICTED: NK-tumor recognition protein isoform X1 [Oreochromis niloticus].  
 (416) XP\_006795194 PREDICTED: NK-tumor recognition protein-like isoform X1 [Neolamprologus brich].  
 (417) XP\_023490560 NK-tumor recognition protein-like isoform X1 [Equus caballus].  
 (418) XP\_015209666 PREDICTED: NK-tumor recognition protein isoform X4 [Lepisosteus oculatus].

|       |              |                                                                               |
|-------|--------------|-------------------------------------------------------------------------------|
| (419) | XP_005797888 | NK-tumor recognition protein isoform X1 [Xiphophorus maculatus].              |
| (420) | CBN81984     | NK-tumor recognition protein [Dicentrarchus labrax].                          |
| (421) | XP_010559731 | PREDICTED: NK-tumor recognition protein isoform X3 [Haliaeetus leucocephalus] |
| (422) | XP_007544415 | PREDICTED: NK-tumor recognition protein isoform X1 [Poecilia formosa].        |
| (423) | XP_014870682 | PREDICTED: NK-tumor recognition protein isoform X1 [Poecilia latipinna].      |
| (424) | XP_011606242 | PREDICTED: NK-tumor recognition protein [Takifugu rubripes].                  |
| (425) | CAG04245     | unnamed protein product, partial [Tetradon nigroviridis].                     |
| (426) | XP_016887118 | PREDICTED: NK-tumor recognition protein isoform X2 [Cynoglossus semilaevis].  |
| (427) | XP_008306161 | PREDICTED: NK-tumor recognition protein isoform X1 [Cynoglossus semilaevis].  |
| (428) | XP_008394441 | PREDICTED: NK-tumor recognition protein isoform X1 [Poecilia reticulata].     |
| (429) | XP_014825423 | PREDICTED: NK-tumor recognition protein isoform X1 [Poecilia mexicana].       |
| (430) | XP_012398954 | NK-tumor recognition protein isoform X8 [Sarcophilus harrisii].               |
| (431) | XP_019063096 | PREDICTED: NK-tumor recognition protein [Fukomys damarensis].                 |
| (432) | XP_009073803 | PREDICTED: NK-tumor recognition protein-like, partial [Acanthisitta chloris]. |
| (433) | XP_016400109 | PREDICTED: NK-tumor recognition protein-like isoform X1 [Sinocyclocheilus rhi |
| (434) | XP_016359192 | PREDICTED: NK-tumor recognition protein-like isoform X1 [Sinocyclocheilus ans |
| (435) | XP_004081327 | NK-tumor recognition protein isoform X1 [Oryzias latipes].                    |
| (436) | XP_020568300 | NK-tumor recognition protein isoform X2 [Oryzias latipes].                    |
| (437) | XP_016041020 | PREDICTED: NK-tumor recognition protein [Erinaceus europaeus].                |
| (438) | XP_017942181 | PREDICTED: NK-tumor recognition protein-like isoform X1 [Manacus vitellinus]. |
| (439) | XP_017942183 | PREDICTED: NK-tumor recognition protein-like isoform X3 [Manacus vitellinus]. |
| (440) | XP_017942182 | PREDICTED: NK-tumor recognition protein-like isoform X2 [Manacus vitellinus]. |
| (441) | XP_020501265 | LOW QUALITY PROTEIN: NK-tumor recognition protein [Labrus bergylta].          |
| (442) | KFP01329     | NK-tumor recognition protein, partial [Calypte anna].                         |
| (443) | XP_015856948 | PREDICTED: NK-tumor recognition protein isoform X3 [Peromyscus maniculatus ba |
| (444) | XP_020139631 | NK-tumor recognition protein isoform X2 [Microcebus murinus].                 |
| (445) | XP_020139628 | NK-tumor recognition protein isoform X1 [Microcebus murinus].                 |
| (446) | XP_006982975 | PREDICTED: NK-tumor recognition protein isoform X2 [Peromyscus maniculatus ba |
| (447) | XP_015856947 | PREDICTED: NK-tumor recognition protein isoform X1 [Peromyscus maniculatus ba |
| (448) | XP_014427753 | PREDICTED: NK-tumor recognition protein isoform X4 [Pelodiscus sinensis].     |
| (449) | XP_013857648 | PREDICTED: NK-tumor recognition protein-like isoform X1 [Austrofundulus limna |
| (450) | XP_023656013 | NK-tumor recognition protein isoform X2 [Paramormyrops kingsleyae].           |
| (451) | XP_023656011 | NK-tumor recognition protein isoform X1 [Paramormyrops kingsleyae].           |
| (452) | XP_023656014 | NK-tumor recognition protein isoform X3 [Paramormyrops kingsleyae].           |
| (453) | XP_004448689 | NK-tumor recognition protein isoform X2 [Dasypus novemcinctus].               |
| (454) | XP_004448688 | NK-tumor recognition protein isoform X1 [Dasypus novemcinctus].               |
| (455) | XP_023476440 | NK-tumor recognition protein isoform X2 [Equus caballus].                     |
