# Supplementary material for: Compression of Large Sets of Sequence Data Reveals Fine Diversification of Functional Profiles in Multigene Families of Proteins: A Study for Peptidyl-Prolyl cis/trans Isomerases (PPIase)
Source: MDPI journal article supplement (doi:10.3390/biom9020059), 2019-02-11
Supplement: s1 [file s1]

# Arrangement of human FKBP5

| FKBPs residing in the endoplasmic reticulum |      |     |      |      |      |      |     |     |     |     |      |      |      |      |      |      |       |       |       |       |
|---------------------------------------------|------|-----|------|------|------|------|-----|-----|-----|-----|------|------|------|------|------|------|-------|-------|-------|-------|
| Fk1a                                        | Fk1b | Fk3 | Fk4a | Fk4b | Fk5a | Fk5b | Fk6 | Fk8 | Fk2 | Fk7 | Fk11 | Fk14 | Fk9a | Fk9b | Fk9c | Fk9d | Fk10a | Fk10b | Fk10c | Fk10d |
| 1 G                                         | G!   | K   | G    | I    | G*   | I*   | G   | L   | Q   | K!  | Q    | K!   | Q    | Q    | S    | S!   | V     | Q     | Q     | E     |
| 2 V!                                        | V!   | Y!  | V!   | I    | V    | I!   | V   | R   | I*  | I!  | V!   | I    | I    | I    | I!   | I    | I!    | V     | L     | I!    |
| 3 Q                                         | E    | T   | L    | R    | L*   | R*   | L   | K   | G*  | E*  | E    | E    | E    | E    | E!   | T    | E!    | S     | E!    | R     |
| 4 V                                         | I    | K*  | K!   | R    | K!   | R*   | K*  | K!  | V!  | V   | T!   | V*   | R    | R    | N!   | S!   | R*    | T!    | T     | T     |
| 5 E                                         | E    | S   | V    | I    | I!   | T    | D   | T   | K*  | L!  | L!   | L!   | F!   | Y*   | K    | H!   | Y     | L     | L     | S     |
| 6 T                                         | T    | V   | I!   | Q    | V    | K    | V   | L!  | K   | H   | V!   | K    | V    | F!   | V    | H    | L     | L     | E     | S     |
| 7 I                                         | I    | L   | K    | T    | K!   | R    | I   | V   | R!  | R   | E    | K    | P*   | P*   | K!   | V!   | K     | I!    | R     | R     |
| 8 S                                         | S    | K*  | R    | R    | R    | K*   | R   | P   | P*  | P   | P    | P*   | P*   | P*   | P*   | P!   | P!    | P!    | P*    | P*    |
| 9 P                                         | P!   | K   | E!   | G    | V*   | G*   | E   | G!  | D   | E!  | E!   | I    | D    | P    | N    | D*   | A     | P     | P     | S     |
| 10 G                                        | G!   | G*  | G*   | E    | G    | E    | G   | P   | H   | N   | P    | F    | E    | S    |      |      |       | H!    | G     | E     |
| 11 D!                                       | D    | D   | T    | --   | N    | --   | A   | P   | --  | --  | P    | --   | E    | --   | --   | D*   | A     | H!    |       | T     |
| 12 G!                                       | G!   | K   | G    | G    | G    | G*   | G!  | G   | C*  | C*  | C    | C*   | C    | C*   | C*   | C    | C*    | C     | C*    | C*    |
| 13 R                                        | R!   | T!  | T    | Y    | E!   | Y*   | --  | S   | P   | S   | A    | H    | R*   | P    | P    | S    | P     | P     | V     | N     |
| 14 T                                        | T    | N!  | E    | A    | E    | S!   | D   | S   | I   | K   | E    | R*   | R*   | R*   | R*   | V*   | R*    | R     | R*    | E     |
| 15 F                                        | F    | F   | M    | K    | T*   | N!   | L   | R   | K!  | T   | P    | K!   | T!   | T!   | I    | S!   | L     | E     | M     | R!    |
| 16 P                                        | P    | P*  | P*   | P*   | P*   | P*   | V   | P*  | S!  | S   | A    | K*   | T!   | V    | I    | S    | V!    | V!    | A     | T     |
| 17 K                                        | K!   | K   | M    | N    | M*   | N*   | A   | V   | R   | K!  | G    | G    | R    | Q!   | Q    | K!   | Q!    | Q     | G!    | K     |
| 18 R                                        | K!   | K*  | I    | E    | I*   | E!   | P   | K   | G*  | G*  | F    | G    | S    | V*   | S    | K!   | M     | D     | A     | L     |
| 19 G                                        | G!   | G*  | G*   | G!   | G*   | G*   | D   | G!  | D*  | G*  | D    | D*   | G    | S*   | G*   | G*   | G     | D     | G*    | G     |
| 20 Q                                        | Q!   | D   | D    | A!   | D    | A    | A   | Q   | V   | D*  | D    | D*   | G    | D*   | D*   | D    | D*    | D     | D*    | D*    |
| 21 T                                        | T!   | V   | R    | I    | K*   | T!   | S   | V   | V!  | L!  | L!   | L!   | F!   | F!   | L    | Y*   | F!    | F     | F!    | F     |
| 22 C                                        | C!   | V*  | V*   | V    | V*   | V*   | V   | V!  | L!  | L!  | L!   | M!   | V    | V    | L    | L*   | V!    | V!    | M     | V!    |
| 23 V                                        | V!   | H   | F    | E    | Y*   | E    | L   | T   | H!  | N*  | H    | L*   | R    | R*   | R*   | K!   | R*    | R*    | R*    | R     |
| 24 V                                        | V    | C*  | V    | V    | V*   | I!   | V   | V   | M!  | A   | I!   | V*   | Y    | Y*   | Y*   | Y!   | Y*    | Y*    | Y*    | Y*    |
| 25 H                                        | H    | W!  | H*   | A    | H*   | H    | K   | H   | H*  | H   | H!   | H*   | H    | H*   | H*   | H*   | H*    | H*    | H*    | H!    |
| 26 Y                                        | Y    | Y*  | Y*   | L    | Y    | Y    | Y   | L   | Y*  | Y   | Y!   | Y!   | Y    | Y*   | Y*   | Y*   | Y!    | Y!    | Y*    | Y*    |
| 27 T                                        | T    | T*  | T*   | E    | K*   | E    | S   | Q   | T!  | D   | T!   | E!   | V    | N*   | N*   | N*   | N*    | N*    | N*    | N*    |
| 28 G*                                       | G*   | G*  | G*   | G    | G!   | G*   | G!  | T   | G*  | G   | G*   | G*   | G    | G*   | G*   | A*   | G!    | G!    | G*    | C*    |
| 29 M                                        | M    | T   | W    | Y    | K*   | R    | Y!  | S   | K   | R   | S    | Y!   | T    | T*   | T!   | S*   | T*    | T*    | S!    | S     |
| 30 L*                                       | L*   | L*  | L*   | Y    | L    | C!   | L   | L   | L*  | L   | L*   | L    | L    | L*   | L*   | L*   | L*    | L*    | L!    | L*    |
| 31 E                                        | Q    | Q   | L    | K    | S!   | G!   | E!  | E   | E   | A!  | V    | E    | P!   | L*   | L*   | E    | L     | M     | L     | L     |

|    |    |    |    |    |    |    |    |    |    |    |    |    |    |    |    |    |    |    |    |    |    |    |
|----|----|----|----|----|----|----|----|----|----|----|----|----|----|----|----|----|----|----|----|----|----|----|
| 32 | D  | N* | D* | D  | D  | N* | -- | H  | N  | -- | K  | -- | D* | K  | -- | -- | -- | -- | -- | -- | -- | -- |
| 33 | G* | G* | G* | G* | -- | G  | G  | M  | G! | D  | D! | D* | D! | D! | D* | D* | D* | D* | D* | D! | D* |    |
| 34 | K  | K* | -- | T! | -- | K* | -- | D  | T  | G* |    |
| 35 | K! | K* | T  | K  | K  | K* | R  | R  | R  | E! | S! | S! | R  | I  | I! | F* | L* | K  | K! | G* | G* |    |
| 36 | -- | -- | V* | -- | L  | -- | M  | P  | Q  | E  | F  | C  | E  | -- | -- | D* | L* | K  | K! | G* | G* |    |
| 37 | F  | F* | F* | F* | F* | D  | F* | F* | Q  | I! | I! | I! | I! | I! | I! | D* | H  | F  | F  | F  | F  |    |
| 38 | D* | D* | D* | D* | D  | S* | D* | D  | D* |    |
| 39 | S* | S* | T  | S* | Q  | S* | C! | S! | S* |    |
| 40 | S* | S* | N* | S* | -- | S  | -- | N  | -- | -- | -- | -- | -- | -- | -- | -- | -- | -- | -- | -- | -- |    |
| 41 | R! | R* | I! | L  | -- | H  | -- | Y  | -- | -- | -- | -- | -- | -- | -- | -- | -- | -- | -- | -- | -- |    |
| 42 | D! | D* | Q  | D  | -- | D* | -- | F  | -- | -- | -- | -- | -- | -- | -- | -- | -- | -- | -- | -- | -- |    |
| 43 | R* | R* | T  | R  | -- | R  | -- | R  | -- | -- | -- | -- | -- | -- | -- | -- | -- | -- | -- | -- | -- |    |
| 44 | N  | N* | S  | K  | -- | N! | -- | K  | -- | -- | N  | Q! | Q  | R* | H  | N! | N! | D  | R* | M  | N* |    |
| 45 | -- | -- | A  | -- | -- | -- | -- | -- | -- | -- | E  | -- | -- | -- | N! | -- | -- | -- | -- | -- | -- |    |
| 46 | -- | -- | K! | -- | -- | -- | -- | -- | -- | -- | -- | -- | -- | -- | -- | -- | -- | -- | -- | -- | -- |    |
| 47 | -- | -- | K* | -- | -- | -- | -- | -- | -- | -- | -- | -- | -- | -- | -- | -- | -- | -- | -- | -- | -- |    |
| 48 | -- | -- | K* | -- | -- | -- | -- | -- | -- | -- | -- | -- | -- | -- | -- | -- | -- | -- | -- | -- | -- |    |
| 49 | -- | -- | K* | -- | -- | -- | -- | -- | -- | -- | -- | -- | -- | -- | -- | -- | -- | -- | -- | -- | -- |    |
| 50 | -- | -- | N  | -- | -- | -- | -- | -- | -- | -- | -- | -- | -- | -- | -- | -- | -- | -- | -- | -- | -- |    |
| 51 | -- | -- | A  | -- | -- | -- | -- | -- | -- | -- | G* | -- | -- | G  | -- | -- | -- | -- | -- | -- | -- |    |
| 52 | K  | K* | K! | D  | R  | E  | R! | T  | P  | Q  | H* | D  | Q! | S  | -- | -- | -- | -- | -- | -- | -- |    |
| 53 | P* | P* | P* | K  | E  | P* | D  | R  | E  | P  | P* | P* | P  | T* | K! | R! | K! | T  | L  | G  | H  |    |
| 54 | F* | F* | L* | F* | L  | F  | V  | R  | L  | F! | K! | L* | I  | F! | T* | T* | T* | F! | V  | T  | T* |    |
| 55 | K  | K! | S! | S  | R  | V* | A  | L  | V  | w* | v* | v! | w* | N* | D* | D* | T* | A  | I  | D  | N  |    |
| 56 | F  | F* | F* | F* | F* | F  | F* | M  | F  | I  | I  | I  | F* | v* | T* | T* | T* | I  | I  | T  | T* |    |
| 57 | M  | R! | K* | D  | E  | S! | T  | K  | T  | S  | v* | E  | T* | F  | y* | y* | y* | V  | V  | y  | y* |    |
| 58 | L  | I* | V* | L* | I  | L* | V  | L! | L  | L  | L* | L* | L* | v* | I! | I! | L* | v! | v! | v! | I! |    |
| 59 | G* | G* | G* | G  | G* | G* | G* | G! | G  | G* |    |
| 60 | K  | K  | V  | K  | E! | K* | E  | E  | -- | T  | v* | Q  | I* | I* | Q  | I* | I* | V  | V  | S  | Q  |    |
| 61 | Q  | Q! | G* | G! | G  | G  | G! | D  | D! | G* | G* | K  | K  | L  | G! | G* | G* | G* | G* | G* | G* |    |
| 62 | -- | -- | -- | -- | E  | -- | E* | -- | -- | -- | -- | -- | -- | -- | -- | -- | -- | -- | -- | -- | -- |    |
| 63 | -- | -- | -- | -- | N  | -- | D  | -- | -- | -- | -- | -- | -- | -- | -- | -- | -- | -- | -- | -- | -- |    |
| 64 | -- | -- | -- | -- | L  | -- | H  | -- | C  | -- | -- | -- | -- | -- | -- | -- | -- | -- | -- | -- | -- |    |
| 65 | E  | E* | K! | E  | D  | Q* | D! | I  | D! | Q  | Q! | Q  | E* | Q* | W* | y* | Q! | R  | W  | y* | K  |    |
| 66 | V* | V* | V* | V! | L  | V  | I! | T  | V! | V* | V* | V* | V* | A  | L  |    |    |    |    |    |    |    |

|     |    |    |    |    |    |    |    |    |    |    |    |    |    |    |    |    |    |    |    |    |    |    |
|-----|----|----|----|----|----|----|----|----|----|----|----|----|----|----|----|----|----|----|----|----|----|----|
| 67  | I* | I* | I* | I* | P  | I* | P* | L! | I  | I* |
| 68  | R  | K* | R* | G* | Y  | K* | I! |    | Q  | K! | K* | G* |    |
| 69  | G* | G* | G* | A! | G* | A* | G* | G* | A! | G* | P! | G* |    |
| 70  | W* | F! | W* | D* | E  | W* | I! | D  | L  | W* | L* |    |
| 71  | E! | E* | D* | I  | R  | D  | I! | E! | L  | D* | E* | Q* | D* | D* | Q  | D* | D* | D* | D* | D* | D* |    |
| 72  | E! | E* | E* | I  | A  | I! | K! | K! | L  | I! | Q* | I! | I! | I! | S! | E  | M* | R! | Q! | Q! | Q! |    |
| 73  | G* | G* | A! | A! | A  | G* | A* | G! | S  | G* | L* | A! | A* | A* | G* | G* | G* | G* | G* | G! | G! |    |
| 74  | V! | A  | L  | I! | I  | V  | L! | L  | P  | T  | L* | M  | L* | L* | L* | L* | L* | L! | L! | L* | L* |    |
| 75  | A  | A! | L  | A  | Q  | A! | E! | L  | L! | D  | L  | L* | L* | L* | L* | L* | L* | L! | L! | L! | L! |    |
| 76  | Q  | Q* | T* | T  | R  | T* | K* | S  | M! | G* | M  | G* |    |
| 77  | M! | M* | M* | M* | M! | M! | M* | M* | M! | M* | D! | G  | M* |    |
| 78  | S! | S* | S  | K  | E  | K! | Q  | R  | D  | C* |    |
| 79  | V  | L  | K! | V  | K  | K* | R! | R  | V  | E  | V! | V  | V* |    |
| 80  | G* | G* | G* | G* | G  | G* | E  | G! | G  | G  | G* |    |
| 81  | Q  | Q* | E* | E* | E* | E  | E* | E* | E* | E* | E! | E* |    |
| 82  | R  | R* | K! | V  | H  | I* | Q  | L  | T  | K! | R! | R* |    |
| 83  | A  | A* | A* | C! | S! | C  | C  | A! | A  | R* | R! | R* | R* | R* | R* |    |
| 84  | K  | K* | R  | H  | I  | H! | I  | R  | M  | K! | A  | K! | K* | K* | K* | K! | K! | K! | K! | K! | K! |    |
| 85  | L  | L! | L  | I  | V  | L! | L  | F  | V  | L* | V! | L* | L* | L* | L* | L* | L* | L! | L! | L! | L! |    |
| 86  | T  | T* | E! | T  | Y  | L* | Y! | L  | T  | I  | I  | I  | I  | I  | I  | I  | I  | I  | I  | I  | I  |    |
| 87  | I  | C* | I* | C  | L  | C  | L* | F  | A  | I* |    |
| 88  | S  | T* | E  | K  | K  | K* | G  | K  | D  | P* |    |
| 89  | P! | P* | P! | P! | P  | P  | P* | P! | S  | S  | S  | S  | S  | S  | S  | S  | S  | S  | S  | S  | S  |    |
| 90  | D  | D! | E* | E  | S  | E* | R  | N  | Y! | E  | L  | F! | L* | L! | L! |    |
| 91  | Y  | V  | W* | Y* | Y! | Y* | Y* | Y! | C  | G  | A* | A* | A* | A* | A* | A* | A! | G! | G! | A* | A* |    |
| 92  | A! | A* | A* | A* | A  | A* | G* | A! | Y* | Y! | Y* | Y! | Y* |    |
| 93  | Y* | Y* | Y* | Y* | F! | Y* | F* | Y! | G* |    |
| 94  | G* | G* | G* | G* | G! | G  | G* | G! | G* |    |
| 95  | A  | A! | K! | S  | S  | S! | E  | T  | P  | E  | K  | K* |    |
| 96  | T  | T  | K* | A  | V  | A* | A  | L  | Q  | R  | R! |    |
| 97  | G* | G* | G* | G* | G  | G! | G* |    |
| 98  | -- | -- | Q  | -- | K  | -- | K  | -- | S  | -- | Y! | -- | -- | -- | -- | -- | -- | -- | -- | -- | -- |    |
| 99  | H  | H* | P  | P  | E  | S  | P! | C  | A! | A  | F  | V  | V  | V  | V  | V  | V  | V  | V  | V  | V  |    |
| 100 | P  | P* | D! | P! | K  | L! | K  | P! | P! | P! | P* |    |
| 101 | G! | G* | A! | P* | F  | P* | F  | P* | P! |    |    |    |    |    |    |    |    |    |    |    |    |    |

|     |    |    |    |    |    |    |    |    |    |    |    |    |    |    |    |    |    |    |    |    |    |
|-----|----|----|----|----|----|----|----|----|----|----|----|----|----|----|----|----|----|----|----|----|----|
| 102 | I  | V* | K  | K  | Q  | K* | G  | L  | Y  | K! | K* | S  | K* | V! | D! | -- | E  | L  | V  | K  | -- |
| 103 | I* | I* | I* | I* | I! | I* | I* | I* | I! | I* | I! | V! | I* | I* | I* | I* | V  | I! | I! | I* | V* |
| 104 | P* | P* | P* | P* | P* | P! | E  | P  | P  | P* |
| 105 | P! | P* | P* | P! | P! | S  | P  | P  | P  | G  | P* | A! | P* | N! | Q* | G* | G* | P  | P  | G! | G  |
| 106 | H! | N* | N  | N  | N  | N! | N! | N  | H  | G  | D! | D* | E! | N! | A* | S* | S* | D* | Q* | S* | S* |
| 107 | A! | A* | A! | A! | A! | A! | A! | T  | A! | A! | A* | A  | S* | S! | A* | A* | A* | A! | A! | A* | A* |
| 108 | T! | T* | K! | T* | E  | T  | E! | T  | A  | T! | T* | V  | T* | V! | S* | V* | V* | T! | S! | V* | V* |
| 109 | L* | L* | L* | L* | L  | L  | L  | V  | L! | L* | L! | V! | L* |
| 110 | V  | I! | T  | V  | K  | F* | I  | L  | C  | V  | I! | Q  | I! | H* | V* | V* | V* | Y! | V! | F! | L  |
| 111 | F* | F* | F* | F* | Y  | F* | Y* | F! | L  | F* | F* | Y! | F* | F* | D* | F* | F* | Y! | H* | F* | F* |
| 112 | D! | D* | E* | E* | E  | E  | V* | E  | E  | E  | E* | D! | N  | D* | D* | D* | D  | D* | V! | N! | E! |
| 113 | V* | V* | V  | V  | L  | I  | V* | I  | V! | V! | I! | V  | I  | V* | V* | I! | I* | V! | V! | V! | V  |
| 114 | E* | E* | E* | E* | H  | E* | T! | E  | T  | E! | E* | E* | D! | L* | A  | H  | E* | L  | L  | H  | E* |
| 115 | L* | L* | L* | L* | L* | L! | L* | L  | L* | L* | L  | L! | L! | L  | L* | V! | L  | L! | L! | V! | L* |
| 116 | L! | L* | V  | F  | K  | L  | K  | D! | K  | L* | Y! | I  | L! | M  | D* | I! | L* | L! | I  | I  | V  |
| 117 | K  | N  | D  | E  | S  | D* | S! | F! | T  | K  | A! | A  | E* | D* | L* | D* | E* | D* | D* | D* | S* |
| 118 | L  | L  | I! | F! | F! | F  | F* | F! | A  | I  | V* | L* | I* | I  | H* | F* | L  | V  | V  | F* | R* |
| 119 | E  | E* | D  | K  | E! | K  | E! | L  | V  | E  | T  | I  | R* | W* | H* | H* | V! | W* | H* | H* | E* |
