# Supplementary material for: Compression of Large Sets of Sequence Data Reveals Fine Diversification of Functional Profiles in Multigene Families of Proteins: A Study for Peptidyl-Prolyl cis/trans Isomerases (PPIase)
Source: MDPI journal article supplement (doi:10.3390/biom9020059), 2019-02-11

Figure S1A. Numbers of FKBP<sub>s</sub> analyzed in this note that were extracted from Blast searches of the NCBI database with 1000 sequences limit cutoff.

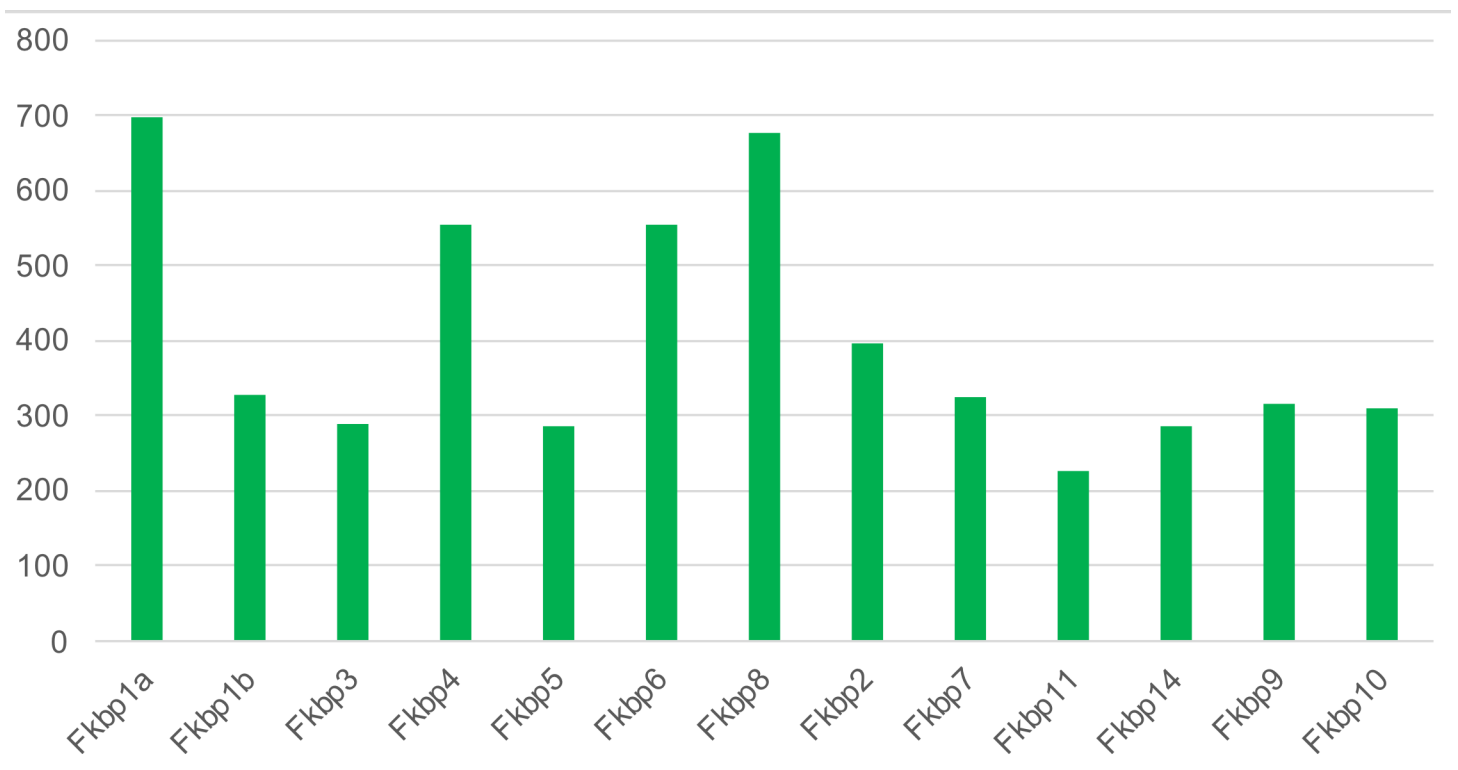

Figure S1B. Numbers of cyclophilins analyzed in this note that were extracted from Blast searches of the NCBI database with 1000 sequences limit cutoff.

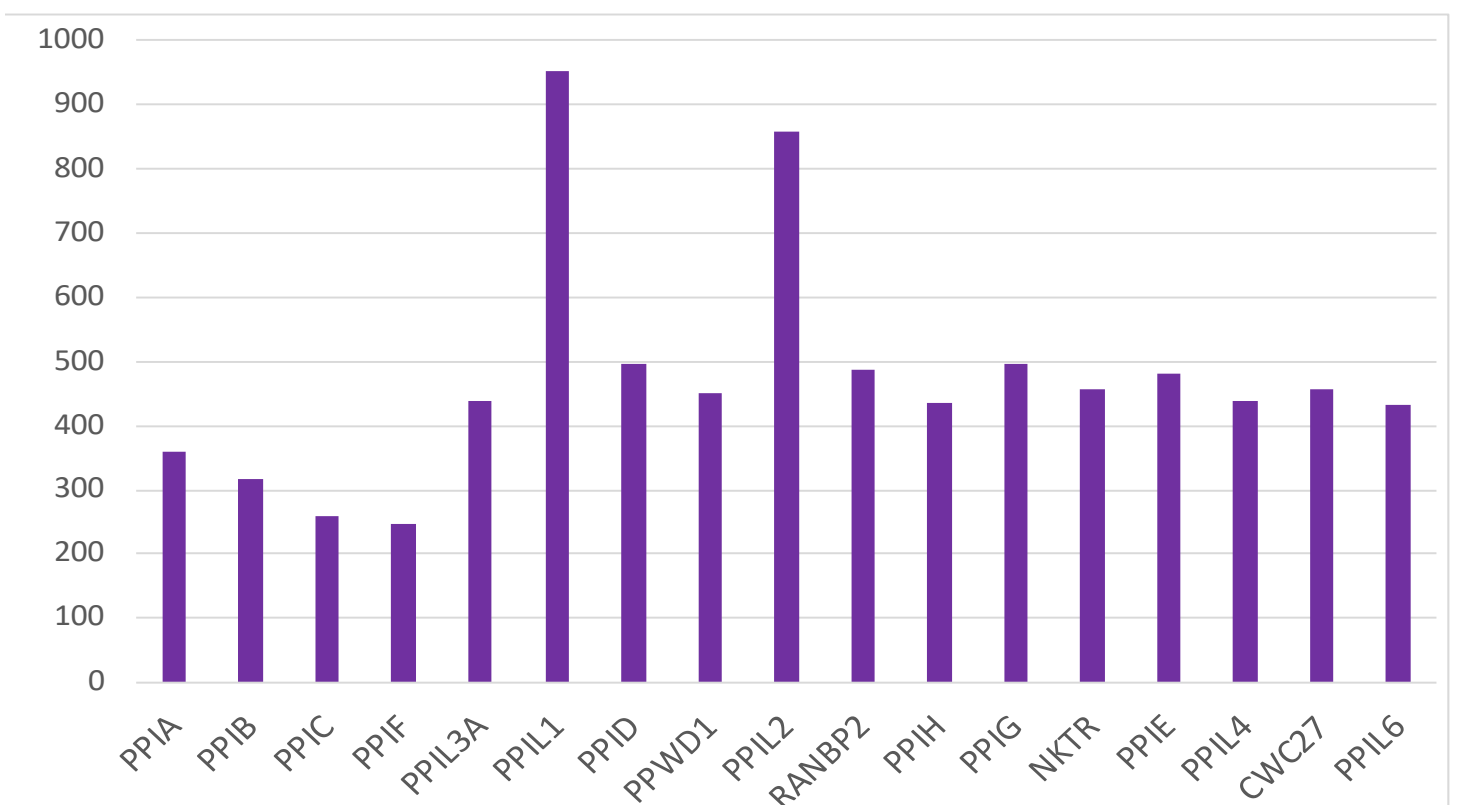

Supplement: s1 [file s1]
