# Supplementary material for: Compression of Large Sets of Sequence Data Reveals Fine Diversification of Functional Profiles in Multigene Families of Proteins: A Study for Peptidyl-Prolyl cis/trans Isomerases (PPIase)
Source: MDPI journal article supplement (doi:10.3390/biom9020059), 2019-02-11
Supplement: s1 [file s1]

[illegible]

```

Character*1 AB, ABE(NCOL),Aminss(22)
Character*3 Fogg(5)
Character*5 Intr(25)
Common ISEQ(NCOL,22), IBE(NCOL)
Common/angel/ AMIWEI(22), HYDRO(22), FTOT(NCOL), Hot(300,50)
Character Apos*5, Pats*1
Common /final/ Joh(50), Apos(50,200), Pats(50,200)
Real Panna(300,40)
C      Number of interactions taken from seqelf
c      Integer Inter1(300), Itera2(300)
      INTEGER Ipop(8), Ioto(6,50), ICHAR(22), JTOT(NCOL)
      Logical Search, Found
C
-----
DATA ICHAR/0,0,-1,-1,0,0,0,0,+1,0,0,0,0,0,+1,0,0,0,0,0,0/
Data Fogg/'Tot','Sig','aa|','Frq','Ent'/
DATA AMINOS/'A','C','D','E','F','G','H','I','K','L',
r      'M','N','P','Q','R','S','T','V','W','Y','-','X'/
Data Aminss/'a','c','d','e','f','g','h','i','k','l',
z      'm','n','p','q','r','s','t','v','w','y','-','x'/
DATA AMIWEI/ 71.07884, 103.14484, 115.08863, 129.11552, 147.17661,
z      57.05196, 137.14120, 113.15948, 128.17416, 113.15948,
z      131.19861, 114.10392, 97.11672, 128.13081, 156.18764,
z      87.07824, 101.10512, 99.13260, 186.21327, 163.17601,
z      0.00000,0.00000/
C      Inverse of Alog(2)
Data Aln2/1.442695042/
C      Aln(20.0) = 2.995732300 its inverse 0.333808200
Data Aln20/0.333808200/
DATA HYDRO/1.8,2.5,-3.5,-3.5,2.8,-0.4,-3.2,4.5,-3.9,3.8,1.9,-3.5,
r      -1.6,-3.5,-4.5,-0.8,-0.7,4.2,-0.9,-1.3,0.0,0.0/
C
-----
C      Open output files
C
-----
Do J=1,NCOL
Seq(1,J) = ' '
Enddo

OPEN(UNIT=2,FILE='msa9.out',status='unknown')
Open(Unit=4,File='msaent.int',status='unknown')
OPEN(UNIT=9,FILE='msaent.dss',status='unknown')
OPEN(UNIT=10,FILE='msaent.hyd',status='unknown')
OPEN(UNIT=11,FILE='msaent.mas',status='unknown')
OPEN(UNIT=14,FILE='msaent.hydt',status='unknown')
OPEN(UNIT=15,FILE='msaent.mast',status='unknown')
Open(Unit=17,File='msa.som',status='unknown')
OPEN(UNIT=1,FILE='msa9.inp',status='old')
C
|||||
Job = 1
Do J = 1,30
Jhut(J) = 0
Enddo
Jhitmax = 0
C
-----
C      Read number of aligned seqences (NLINE) and volume of pages (NPAGE)
C      Entropy/sequence dump file 24

Jstep = 0
Write(24,240)

```

```

        Write(19,240)
240  Format(/20X,'Shannon entropy (Ie) coding system'/
      #10X,' -----'/'
      #10X,' 0.0  eq * / 0.01-0.25 eq + / 0.251-0.5 eq = / 0.51-1 eq |'/'

      READ(1,1) LINE
      WRITE(2,11) LINE
      WRITE(9,11) LINE
      WRITE(10,11) LINE
      WRITE(11,11) LINE
      Read(1,110) Ncase
      Nlarge = 0
      Jshiff = 0
      Jff = 0

C      Grande - Grande - Grande Loop

9800 READ(1,110) NLINE
      Jstep = Jstep + 1
      IAC = 0
      IBC = 0
      Search = .True.
      Found = .False.
      Write(2,1110) Job
1110 Format(/10X,'ATTENTION ::: Job stream ||||| Pass: ' I5//)
      READ(1,110) NPAGE
      Read(1,112) Filnam
112  Format(A)
110  format(I10)
C      |||||
      WRITE(2,120) Ncase, NLINE, NPAGE, Filnam
120  FORMAT(10X,'Number of cases to be treated',I6/
1      10X,'Number of sequences aligned =',I6/
r      10X,'Number of pages occupied      =',I6/
#      10X,'File-name:::',A)
      Jbuf = 0
C      |||||
C      Read in the firts two line from clustal_W output
      Open(Unit=3,File=Filnam,status='old')
C      Then go on with MSA and establish its length and coding range
5      READ(3,1,END=600) TITLE
      READ(3,1,END=600) LINE
      Buff(1) = TITLE(1:76)
      Buff(2) = LINE(1:76)
4      format(A)
1      FORMAT(A)
11     FORMAT(A/)
10     Read(3,1,End=600) Line
      IP = 1

100  READ(3,1,END=600) LINE
      If(Search) then
      Do J=90,1,-1
      If(LINE(J:J) .ne. ' ' .AND. .not.Found) then
      Found = .true.
      Lbeg = J
      Endif
      IF(Found .and. LINE(J:J) .eq. ' ') Then

```

```

Jbeg = J
Lend = Lbeg - Jbeg
Write(2,7) Lend, Jbeg
7   format(/10X,'MSA-block-length',I3,2X,'Seq # 1 starts at',I4)
    Rewind(3)
    Search =.false.
    GOTO 5
    Endif
    Enddo
    Endif
C=====
    KIN = LINE
    CODEX(IP) = LINE(1:Jbeg)
    DO J=1,Lend
    AB = LINE(J+Jbeg:J+Jbeg)
    SEQ(IP,J+IAC) = AB
C
C   Set-up reference sequence
C
    If(Job .eq. 1) SeqRef(J+IAC,IP) = AB

    If(Jshiff .eq. 0) Pan(J+IAC,IP) = AB

    ENDDO
    IP = IP + 1
    IF(IP .LE. NLINE+1) GOTO 100
    IAC = IAC + Lend
    IBC = IBC + NLINE
    IF(IBC .LT. NLINE*NPAGE) GOTO 10
600  CLOSE(3)
C   ||||||||||||||||||||||||||||||||||
C   -----
    If(Jstep .gt. 1) goto 400
    If(Jstep .gt. 1) goto 400
    write(97,97)
97   Format('Stating length')
    Do j=1,NCOL
    write(97,987) j, Seq(1,j)
987  format(I5,2X,A1)
    enddo

    Klun = 0
    Do K=1,NCOL
    If(Seq(1,K) .eq. ' ')Then
    Kac = K-1
    goto 565
    Endif
    Enddo
565  write(57,570) Kac, IAC, NCOL
    write(57,57) (Seq(1,Kop),Kop=1,NCOL)
57   Format(60A1)
570  format('Kac, IAC=',3I8)
    Do J = 1,Kac
    write(57,572) J, (SeqRef(J,L),L=1,IP-1)
    enddo
    Do J=1,Kac
    write(57,572) J, (Pan(J,L),L=1,IP-1)
572  format(I5,1X,30(A1,1X))

```

```

        enddo
C      Real length of sequence plus gaps

400    Do K=1,500
        If(Seq(1,K) .eq. ' ')Then
            Kat = K-1
            goto 5650
        Endif
        Enddo
5650    SEQ(1,IAC+1) = ' '

C      Calculate the pIs of each protein fragment

        Write(88,549) Job, NLINE
549    Format('#####',2X,'This is step ',I5,' entries :',2I5)
        Do J = 1,NLINE
            write(88,888) (SEQ(J,K),K=1,Kat)
888    format(70A1)
        enddo

        If(Jstep .eq. 1) Kat = Kac
        Do J = 1,NLINE
            Jak = J
            Krel = 0
            do 280 K = 1,Kat
                AB = SEQ(Jak,K)
                IF(AB .eq. '-' .OR. AB .eq. ' ') goto 280
                Krel = Krel + 1
                write(69,*) Job, Krel
                TSEQ(Krel) = SEQ(Jak,K)
280    Continue
            If(Job .eq. 2) Then
                write(89,765) Krel
765    format('Krel',I5)
                write(89,89) (TSEQ(Ln),Ln=1,Krel)
89    format(60A1)
            Endif

C      Write(6,672) NLINE, Kat, Krel
672    format('NLINE',3I6)
        PIC = 0.0
        write(6,871) (TSEQ(I),I=1,Krel)
871    format(60A1)
        Call PICAL(Job,Jak,Krel,PIC,TSEQ)
        write(88,551) Jak, PIC
551    Format(I6,2X,F6.3)
        Enddo

C      Real length of Letter-code in the first sequence

        Lmm = 0
        Do J=1,IAC+1
            AB = SEQ(1,J)
            Jakk = J
            If(AB .eq. ' ') Then
                Lmm = J-1
                GOTO 990
            Endif

```

```

Enddo
990 IM = Lmm
    IX = 1

    Write(66,766)IAC, IBC, NLINE+1, Jakk, IM
766 format('NLINE',5I8)
    Do K=1,NLINE+1
    write(66,778) CODEX(K), (SEQ(K,J),J=1,IM)
778 format(A,2X,60A1)
    enddo

C    Set up counter matrix
    DO J=1,IM
    DO I=1,22
    ISEQ(J,I) = 0
    ENDDO
    ENDDO

1000 DO J = 1,NLINE
    JA = J
    DO I = 1,22
    IF(SEQ(JA,IX) .EQ. AMINOS(I) .OR. SEQ(JA,IX) .EQ. Aminss(I))
    # ISEQ(IX,I) = ISEQ(IX,I) + 1
    ENDDO
    ENDDO
    IX = IX + 1
    IF(IX .LE. IM) GOTO 1000
    Write(6,5617) IX, IM
5617 format('IXIM',2I10)
C    -----
C    Chose the highest score for AA

C    making new parentheses for future MSA

    IGF = 0
    JGH = IM

C    Beginning of first sequence-Letter in the MSA
    Do J=1,IM
    If(SEQ(1,J) .ne. '-') then
    IGF = J
    goto 465
    endif
    enddo

465 Write(2,517) IAC, JGH
517 format(10X,'Total block-length',I5/10X,'Coding-length',I5/)

C    Create new input data to damma

    Do J = 1,IM
    JTOT(J) = 0
    FTOT(J) = 0.0
    STR(J) = ' '
    SYY(J) = ' '
    IBE(J) = 0
    ABE(J) = ' '
    Enddo

```

```

Do K=1,NLINE
Kot = K
Lbox = 0

Do J=1,IM
If(SEQ(Kot,J) .ne. '-' .AND. J .LT. IGF) Lbox = Lbox + 1
ENDDO

Kbox = 0
Nbox = 0

Do J=IM,1,-1
If(SEQ(Kot,J) .ne. '-' .AND. J .GT. JGH) Nbox = Nbox + 1
Enddo

If(Kbox .gt. 0 .OR. Mbox .gt. 0) then
  If(Kbox .eq. 0) Kbox = 1
  write(43,44) CODEX(Kot), Kbox, Mbox
endif
If(Lbox .gt. 0 .OR. Nbox .gt. 0) then
  write(45,45) CODEX(Kot)
  write(44,44) CODEX(Kot), Lbox, Nbox
44 format(A16,2X,I3,3X,I3)
45 format(1X,A16)
endif
Enddo

C Ending phase

IU = 0
DO J=1,IM
JA = J
IU = IU + 1
IJ = 0
DO K=1,22
IF(ISEQ(JA,K) .GT. IJ) THEN
IJ = ISEQ(JA,K)
IBE(IU) = IJ
ABE(IU) = AMINOS(K)
c write(6,5511) J, IJ, AMINOS(K)
ENDIF
ENDDO
ENDDO

C Calculate some statistical data
AHYDP = 0.0
AHYDM = 0.0
AMASP = 0.0
AMASM = 0.0
IAHP = 0
IAHM = 0
IAMP = 0
IAMM = 0
ISTOT = 0
KSTOT = 0
WRITE(9,9)
9 FORMAT(3X,' ',1X,'# AAC',3X,'Tot',1X,'+',2X,'-',1X,2X,'Hy+',
e 2X,'Hy-',2X,'Tot',3X,'+',4X,'-',3X,'Ma+',2X,'Ma-')

```

```

KOL = 0
DO K = 1,IM
DO L = 1,20
KOL = KOL + ISEQ(K,L)
ENDDO
ENDDO
WRITE(2,14) KOL
14  FORMAT(10X,'Number of residues aligned  =',I8/)
write(6,521) IU, IBE(IU), ABE(IU)
521  format('IU',I4,1X,I4,1X,A1)

C      Grand looping

DO 9000 J=1,IM+1
JA = J
AB = ABE(JA)
DO K = 1,20
IF(AB .EQ. AMINOS(K)) IYY=K
ENDDO
HYDREF = HYDRO(IYY)
VMASRE = AMIWEI(IYY)
KX = 0
ITOT = 0
KMXX = 0
DO K=1,20
IF(ISEQ(JA,K) .GT. 0) ITOT = ITOT + ISEQ(JA,K)
IF(ISEQ(JA,K) .GT. KMXX) THEN
KMXX = ISEQ(JA,K)
KX = K
ENDIF
ENDDO
JTOT(JA) = ITOT
FTOT(JA) = FLOAT(KMXX)/FLOAT(JTOT(JA))
STR(JA) = ' '
SYY(JA) = ' '

C      If consensus sequeunce was found
IF(ITOT .EQ. IBE(JA)) Then
STR(JA) = '*'
SYY(JA) = '*'
Endif

550  IYPP = 0
IIPP = 0
IMMA = 0
JMMA = 0
IUPS = 0
DO 200 K=1,20
IF(K .EQ. IYY) GOTO 200
IF(ISEQ(JA,K) .GT. 0) THEN
IUPS = IUPS + 1

C      Less hydrophobic than the reference (most populated) amino acid
IF(HYDREF .GE. HYDRO(K)) IYPP = IYPP + ISEQ(JA,K)
C      More hydrophobic than the reference amino acid
IF(HYDREF .LT. HYDRO(K)) IIPP = IIPP + ISEQ(JA,K)
C      Less bulky amino acid than the reference
IF(VMASRE .GE. AMIWEI(K)) IMMA = IMMA + ISEQ(JA,K)
C      More bulky amino acid than the reference

```



[illegible]

```

Do J=1,JGH
Star(J) = ' '
Seqq(J) = ' '
Enddo
IH = 0
Jpp = 0
Write(21,210) Job, Filnam
If(Job .ge. 2) Then
Write(56,210) Job, Filnam
Endif

If(Job .ge. 2) Write(560,210) Job, Filnam
Write(22,210) Job, Filnam
210 format('##### This is Job-step',I5,' fro file: ',A)
C
500 WRITE(2,2) (AMINOS(I),I=1,21), (Fogg(L),L=1,5)
2 FORMAT(4X,21(3X,A1),3X,3(1X,A3),2(3X,A3))

DO J=1+IH,36+IH
Jak = J
Bagg = Float(JTOT(J))
Sip = 0.0
Sax = 0.0

Do M=1,8
Ipop(M) = 0
Enddo

Do M=1,20
If(M .eq. 1 .OR. M .eq. 8 .OR. M .eq. 10 .OR. M .eq. 11
# .OR. M .eq. 18) Ipop(1) = Ipop(1) + ISEQ(J,M)
If(M .eq. 13) Ipop(2) = Ipop(2) + ISEQ(J,M)
If(M .eq. 6) Ipop(3) = Ipop(3) + ISEQ(J,M)
If(M .eq. 2) Ipop(4) = Ipop(4) + ISEQ(J,M)
If(M .EQ. 7 .OR. M .EQ. 9 .OR. M .EQ. 15)
# Ipop(5) = Ipop(5) + ISEQ(J,M)
If(M .eq. 3 .OR. M .EQ. 4 .OR. M .EQ. 12 .OR. M .EQ. 14)
# Ipop(6) = Ipop(6) + ISEQ(J,M)
If(M .eq. 16 .OR. M .eq. 17) Ipop(7) = Ipop(7) + ISEQ(J,M)
If(M .EQ. 5 .OR. M .GE. 19) Ipop(8) = Ipop(8) + ISEQ(J,M)
Enddo

C Simpson diversity population

Divers = 0.0
Bagicz = Bagg*(Bagg-1.0)
Stagic = 0.0

Do M = 1,8
Stagic = Stagic + Float(Ipop(M)*(Ipop(M)-1))
enddo

If(Bagicz .gt. 0.0) Divers = 1.0 - Stagic/Bagicz
write(577,577) (Ipop(Lmm),Lmm=1,8), JTOT(J), Bagg, Bagicz, Stagic,
# Divers
577 format(8I4,2X,I5,2X,4F10.3)

Do K=1,20

```

```

Pagg = Float(ISEQ(Jak,K))
If(Bagg .gt. 0.0) Fagg = Pagg/Bagg
If(Bagg .gt. 0.0 .AND. Pagg .gt. 0.0) Then
Sip = Sip + Fagg*Aln2*Alog(Fagg)
Sax = Sax + Fagg*Aln20*Alog(Fagg)
Endif
enddo

Sopa = Abs(Sip)
Saxa = Abs(Sax)
If(Sopa .gt. 0.0 .and. Sopa .le. 0.25) STR(J) = '+'
If(Sopa .gt. 0.25 .and. Sopa .le. 0.5) STR(J) = '='
If(Sopa .gt. 0.5 .and. Sopa .le. 1.0) STR(J) = '|'
If(Saxa .gt. 0.0 .and. Saxa .le. 0.062) SYJ(J) = '+'
If(Saxa .gt. 0.062 .and. Saxa .le. 0.125) SYJ(J) = '='
If(Saxa .gt. 0.125 .and. Saxa .le. 0.25) SYJ(J) = '|'
C >>>>>>>>>>>>>>>>>>>>>>>>>>>>>>>>>>>>>>>>>>>>
WRITE(2,3) J, (ISEQ(J,I),I=1,21), JTOT(J), IBE(J), ABE(J),
t      STR(J), FTOT(J), -Sip
Write(4,33) J, JTOT(Jak)
33 format(2I5)
3 FORMAT(I4,21(1X,I3),3X,I3,1X,I3,2X,2A1,2X,F5.3,2X,F5.3)
write(156,769) SEQ(1,J), Jhit, Jhh, Jhit+Jhh, Job
769 format(2X,A1,2X,'Jhit=',I4,2X,3I4)
C
C Attention HERE SEQ(1,J) correspond to leading (top) entry in given MSA
C
If(SEQ(1,J) .ne. '-') then
Jhit = Jhit + 1
Jpp = Jpp + 1

543 If(SeqRef(Jpp,Job-1) .eq. '-') Then
Jpp = Jpp + 1
goto 543
Endif

Star(Jhit) = STR(Jak)
Seqq(Jhit) = SEQ(1,Jak)
If(Jshiff .gt. 0) Then
San(Jhit,Jshiff+Jff) = Seqq(Jhit)
San(Jhit,Jshiff+Jff+1) = Star(Jhit)
C Hot(Jhit+Jhh,Jshiff+Jff) = Saxa
Hot(Jhit+Jhh,Jshiff) = Saxa
write(560,56) Job,J,Jhit,Seqq(Jhit),SeqRef(Jpp,Job-1),Saxa
C TEMPORARY BLOCK
write(56,56) Job,J,Jhit,Seqq(Jhit),SeqRef(Jpp,Job-1),Saxa, Sopa,
# Divers
write(6,56)
# Job,J,Jhit,Seqq(Jhit),SeqRef(Jpp,Job-1),Saxa, Sopa, Divers
56 Format(3I5,1X,2(1X,A1),2X,3F6.3)
Endif

write(21,338) Float(J-IGF+1), Float(Jhit), JTOT(J),
# -Sip, -Sax, SEQ(1,Jak), STR(Jak)
write(211,338) Float(J-IGF+1), Float(Jhit), JTOT(J),
# -Sip, -Sax, SEQ(1,Jak), STR(Jak)
write(22,337) Float(Jhit), -Sax
Endif
```

```

C
C      Ending entropy for 'long' sequence
C      Below if thereis a gap
C
      If(SEQ(1,J) .eq. '-') then
      write(156,8711)
8711 format('we arein job -----')
      Saxon = -1.0
      Jhh = Jhh + 1
      Hot(Jhit+Jhh,Jshiff) = Saxon
      write(211,338) Float(J-IGF+1), Float(Jhit+Jhh), JTOT(J),
#          -Sip, -Sax, SEQ(1,Jak), STR(Jak)
      Endif

337  format(2F10.3)
338  format(2F10.3,2X,I4,1X,F10.5,3X,F5.2,2X,2A1)
      LM = LM + 1
      If(LM .ge. JGH) goto 1350
      ENDDO

      IH = IH + 36
      IF(LM .LE. IM+1) GOTO 500
C
C      -----
C      Make special output of TIPS
1350 Write(6,671) Job, LM
      671 format('In job made steps',2I8)
      If(Job .eq. 1) Jhitmax = LM

      JJx = 0
      KKx = 70
      KKP = Jhit/70
      KKV = 0
      Do K=1,KKP
      KKV = KKV + 70
      Enddo
      KKC = Jhit - KKV
      write(6,876) Jhit, KKP, KKC, KKV, JGH
876  format('Jhit',I5,' KPP',I5,' KKC',I5,' KKV',I5,' JGH',I5)
      Write(24,21) Job, Filnam
21  Format(/10X,'Passing Job',I5,' from ',1X,A//)
C
700  Write(24,24) (Seqq(L),L=1+JJx,KKx+JJx)
      Write(24,24) (Star(J),J=1+JJx,KKx+JJx)
      Write(24,244)
244  Format(/)
      JJx = JJx + 70
24  format(5X,70A1)
      If(JJx .lt. KKV) goto 700
      JJx = JJx - 70
      Write(24,24) (Seqq(L),L=KKV+1,KKV+KKC)
      Write(24,24) (Star(J),J=KKV+1,KKV+KKC)
      Write(24,245)
245  Format(/)

      Jstar = 0
      Jplus = 0
      Jequa = 0

```

```

Jvert = 0
Stt = 0.0
Plu = 0.0
Equ = 0.0
Ver = 0.0
Do J = 1,Jhit
If(Star(J) .eq. '*') Jstar=Jstar+1
If(Star(J) .eq. '+') Jplus=Jplus+1
If(Star(J) .eq. '=') Jequa=Jequa+1
If(Star(J) .eq. '|') Jvert=Jvert+1
enddo
If(Jhit .gt. 0) Then
pp = Float(Jhit)
Stt = Float(Jstar)/pp
If(Jplus .gt. 0) Plu = Float(Jplus)/pp
If(Jequa .gt. 0) Equ = Float(Jequa)/pp
Ver = Float(Jvert)/pp
Endif
Top = 1.0 - (Stt+Plu+Equ+Ver)
If(Job .eq. 1) write(6,6688) Job, Stt, Plu, Equ, Ver, Top
6688 format('Job etc',I5,5F10.3)
C2345678901234567890123456789012345678901234567890123456789012345678
90
Write(24,295) NLINE,Jhit,Jstar,Stt,Jplus,Plu,Jequa,Equ,
#
Jvert,Ver,Top
295 Format('Seq-Resi',I4,'|',I3,1X,'///',' * ',I3,1X,F4.3,
# 2X,' / + ',I3,1X,F4.3,' / = ',I3,1X,F4.3,' / | ',I3,1X,
# F4.3,2X,'///',' Rest = ',F4.3)
Write(24,285)
285 Format('||-----|-----|-----|-----|-----|
#-----|-----|-----| | /)
Nlarge = Nlarge + NLINE
C Make small-letters sequence
Do J=1,IM
REQ(1,J) = SEQ(1,J)
Enddo
C ++++++
Do K=2,NLINE
Kot = K
Do J=1,IM
AB = SEQ(Kot,J)
If(AB .eq. SEQ(1,J)) REQ(Kot,J) = SEQ(Kot,J)
If(AB .ne. SEQ(1,J)) then
Do M=1,22
IF(AB .eq. AMINOS(M)) Then
REQ(Kot,J) = Aminss(M)
goto 50
endif
50 enddo
EndIF
Enddo
Enddo

C Insert recent

Do J = 1,IM
REQ(NLINE+1,J) = SEQ(NLINE+1,J)
Enddo

```

```

      Nqq = IM/60
      Kb = 1
      Kc = 60
      N1 = 0
      L = 0
C|||||
      Write(55,31)
31  Format(/)
C|||||
      Write(55,32) Jstep, Buff(1)
40  Write(55,30) Buff(2)
32  Format('Step no:',I5,2X,A)
30  Format(A)
      Do J=1,NLINE+1
      write(55,35) CODEX(J), (REQ(J,M),M=Kb,Kc)
      enddo
35  format(A,60A1)
      N1 = N1 + 1
      If(N1 .lt. Nqq) Then
      Kb = Kb + 60
      Kc = Kc + 60
      elseif(N1 .eq. Nqq) Then
      Imma = IM - Kc
      Kb = Kb + 60
      Kc = Kc + Imma
      Endif
      IF(N1 .lt. NPAGE) goto 40

      Job = Job + 1
      Do J=1,IM
      JTOT(J) = 0
      IBE(J) = 0
      ABE(J) = ' '
      Enddo
      Jshiff = Jshiff + 1
      If(Jshiff .ge. 2) Jff = Jff + 1
      If(Job .gt. 2) Then
      Write(67,777) Jhit
      Jhut(Job) = Jhit
      Endif
777  Format(I10)
C
C      Cleaning SEQ(+,+)
C
      Write(88,7651) NLINE, Kat
7651 format('Attention NLINE-Kac cleaning', I5,2X,I6)
      Do J = 1,NLINE
      Do K = 1,Kat
      SEQ(J,K) = ' '
      Enddo
      Enddo
      IF(Job .le. Ncase) goto 9800
C
C      Returning point for Job :: GOTO 9800
C
      Klotz = 0
      Do J = 1,Jhit
      If(SeqRef(J,1) .eq. '-') Klotz = Klotz + 1

```

```

        Enddo
C      Set-up matrix
        Jhit = Jhit + Klotz

        Write(6,679) Jshiff, Jhit, Klotz
679      format(10X,'Jshiff - Jhit - There are skipped positions',3I4)

        Do M = 1,Jhit
        Do K = 1,2*Jshiff
        Tan(M,K) = ' '
        Enddo
        Enddo

C      Kola = 2*Jshiff - 2
        Kolb = Jshiff - 1

C      Kolb === Number of Job - the first MSA-matrix

        write(6,54) Kolb, Jhit, Jhitmax
54      format('Width-Length of unit=18,',I5,2x,2I4)
C
        Do K=1,Jhitmax
        write(18,675) K, (SeqRef(K,L),L=1,Kolb)
675      Format(5X,I3,2X,30(1X,A1))
        Enddo
C      Do K = 1,Jhitmax+Jhh
        Do K = 1,Jhitmax
        AB = SEQ(1,K)
        write(182,677) K, AB, (Hot(K,L),L=1,Kolb)
677      Format(2X,I3,1X,A1,1X,2X,30F5.2)
        Enddo
C
        Ku = 0
        Kg = 0
        Do M = 1,Kolb
        MM = M
        Do 6900 K = 1,Jhitmax
        If(SeqRef(K,MM) .eq. '-') Then
        Tan(K,MM+Ku) = '-'
        Tan(K,MM+Ku+1) = ' '
        Kg = Kg + 1
        Goto 6900
        Endif
        Tan(K,MM+Ku) = San(K-Kg,MM+Ku)
        Tan(K,MM+Ku+1) = San(K-Kg,MM+Ku+1)
6900      Continue
        Kg = 0
        Ku = Ku + 1
        Enddo

        Do K=1,Jhitmax
        Write(17,685) (San(K,L),L=1,Kola)
        enddo
        Do K=1,Jhitmax
        Write(19,685) K, (Tan(K,L),L=1,Kola)
685      Format(9X,I3,2X,40(2A1,3X))
        enddo
C

```

```

        Write(24,2440) Nlarge - Ncase + 1
2440 Format(/10X'The total number of analyzed sequences',I5)
        CLOSE(2)
        CLOSE(9)
        CLOSE(10)
        CLOSE(11)
        Rewind(21)
        Jks = 0
        Jjj = 0

5500 Read(21,1,Err=8230,End=8230) Line

        IF(Line(1:1) .eq. '#') Then
            Joh(Jks+1) = Jjj
            Jks = Jks + 1
            Jjj = 0
            goto 5500
        Endif

        Jjj = Jjj + 1
        Apos(Jks,Jjj) = Line(41:45)
        Pats(Jks,Jjj) = Line(48:48)
        goto 5500
8230 Write(6,641) Jks
641  Format('Jks='I6)

        do J = 1,Jks
            write(6,641) Joh(J)
        Enddo

        Do K=1,Jhitmax
            If(SeqRef(K,M) .eq. '-') Panna(K,M) = '-'
            write(181,6751) K, Apos(2,K), (SeqRef(K,L),L=1,Kolb)
6751 Format(5X,I3,2X,A5,2X,30(1X,A1))
        Enddo
C
C      Ending phase with heatmap calculation
C

        Rewind(67)
        Rewind(56)
        Close(56)
        Close(67)

        Jx = 1

        Open(Unit=67,status='old')
        Open(Unit=56,status='old')

        Do J = 1,30
            Write(6,734) Jhut(J)
734  Format('Jhut',I6)
        enddo

        Do Jm = 1,Ncase-1

            Read(67,*) Ipost
            Write(6,673) Ipost
673  format('Ipost=',I5)

```



```

Read(56,1) LINE
Write(6,1) LINE
Kost = Ipost

Do L = 1,Kost
Read(56,56) Job,J,Jhit,AB,AB,Saxa,Sopa,Divers
write(6,56) Job,J,Jhit,AB,AB,Saxa,Sopa,Divers
Saxyy(L) = Saxa
Saxzz(L) = Sopa
DiSeQQ(L) = Divers
Enddo

1300 Continue
Ican = 0
Jcan = 1
Do M=1,Kac
Ican = Ican + 1

If(SeqRef(M,Jx) .ne. '-') Then
Sunn(Ican,Jx) = Saxyy(Jcan)
Tuna(Ican,Jx) = Saxzz(Jcan)
Bunn(Ican,Jx) = DiSeQQ(Jcan)
Jcan = Jcan + 1
Elseif (SeqRef(M,Jx) .eq. '-') Then
Sunn(Ican,Jx) = -3.00
Tuna(Ican,Jx) = -5.00
Bunn(Ican,Jx) = -6.00
Endif
Enddo
write(677,988) Jx
988 format('Jx=',I6)
Jx = Jx+ 1
Enddo

write(6,7810) Jx-1
7810 format('Jx=',I4)

Open(Unit=72,file='Names.dat',status='old')
Read(72,1) Line
Write(71,1) Line
Do J=1,Jx-1
Read(72,2450) Kl, Intr(J)
2450 Format(I3,A5)
Enddo
Write(71,2460) (Intr(J),J=1,Jx-1)
Write(73,2460) (Intr(J),J=1,Jx-1)
2460 Format(8X,20(A5))

Do L = 1,Jx-1
Do M = 1,6
Ioto(L,M) = 0
Enddo
Enddo

Do L=1,Kac
Kot = 0
Min = 0

Do I = 1,Jx-1

```

```

Assa(I) = ' '
Enddo

C
Do J=1,Jx-1
If(Sunn(L,J) .gt. 0.5) Then
Assa(J) = ' '
Ioto(1,J) = Ioto(1,J) + 1
Endif
If(Sunn(L,J) .gt. 0.25 .AND. Sunn(L,J) .le. 0.5)Then
Assa(J) = ' '
Ioto(2,J) = Ioto(2,J) + 1
Endif
If(Sunn(L,J) .gt. 0.125 .AND. Sunn(L,J) .le. 0.25)Then
Assa(J) = '!'
Ioto(3,J) = Ioto(3,J) + 1
Endif
If(Sunn(L,J) .gt. 0.065 .AND. Sunn(L,J) .le. 0.125)Then
Assa(J) = '| '
Ioto(4,J) = Ioto(4,J) + 1
Endif
If(Sunn(L,J) .GE. 0.0 .AND. Sunn(L,J) .LE. 0.065) Then
Ioto(5,J) = Ioto(5,J) + 1
Assa(J) = '*'
Endif
If(Sunn(L,J) .Eq. -1.000) Then
Assa(J) = '-'
Ioto(6,J) = Ioto(6,J) + 1
Endif
Enddo

write(71,233) L, (SeqRef(L,J),Assa(J),J=1,Jx-1)
233 format(I4,5X,25(2X,2A1,1X))
write(73,234) L, (Assa(J),J=1,Jx-1)
234 format(I4,3X,25(1X,A1,2X))
Do K=Jx-1
Write(6,631) L, (Sunn(L,K),K=1,Jx-1)
Write(61,631) L, (Sunn(L,K),K=1,Jx-1)
Write(62,631) L, (Tuna(L,K),K=1,Jx-1)
Write(63,631) L, (Bunn(L,K),K=1,Jx-1)
631 Format(I5,1X,25F7.3)
enddo
Write(73,2490) (Intr(J),J=1,Jx-1)
2490 Format(/1X,'MMPs',20A5)
Write(73,2495)
C123456789012345678901234567890123456789012345678901234567890
2495 Format('-----')
#-----')
Do I=1,5
Write(73,749) (Ioto(I,J),J=1,Jx-1)
749 Format(5X,30I4)
Enddo
STOP
END

C-----C
C A Fortran-77 program to calculate pI from sequence C
C See S. Skoog and A Wichman — Trends in Analytical C
C Chemistry Vol. 5, pp. 82-83, 1986 C C

```

```

C-----C
      SUBROUTINE PICAL(Kob,NNN,ITD,PIC,TSEQ)
      EXTERNAL FUNC
      REAL MINIF
      Real zbrent
      CHARACTER*1 TSEQ(500)
      CHARACTER*1 AMINOS(22)
      COMMON/PIPIA/ IC,ID,IE,IH,IK,IR,IY, PI(9)
      DIMENSION CTERM(20), CNTERM(20)
C      R      K      Y      C      H      D      E      NT      CT
      DATA PI/12.5,10.5,10.1,8.3,6.0,3.9,4.3,0.0,0.0/
      DATA CTERM/2.4,2.2,2.1,2.1,1.7,2.2,2.2,2.4,1.8,2.3,
"      2.3,2.2,2.1,2.2,2.0,2.2,2.1,2.4,2.2,2.3/
      DATA CNTERM/9.9,9.0,8.8,9.8,10.8,9.1,9.7,9.8,9.2,9.8,
x      9.7,9.0,9.3,9.2,10.6,9.2,9.1,9.4,9.1,9.7/
      DATA AMINOS/'A','R','N','D','C','Q','E','G','H','I','L','K',
+      'M','F','P','S','T','W','Y','V','Z','X'/
C|||||||||||||||||||||||||||||||||||||||||||||||||||||||||||||
C      Preset starting parameters
      write(889,78) Kob, NNN, ITD
78      format('Step - NLINE - ITD',3I6)
      write(889,67) (TSEQ(I),I=1,ITD)
67      format(60A1)
      If(ITD .eq. 0) goto 99
      KOUNT = ITD
      KL = 0
      KM = 0
      PH1 = 1.0
      PH2 = 14.0
C      Calculate the integer number of charged AA
      IR = 0
      IK = 0
      IH = 0
      IC = 0
      ID = 0
      IE = 0
      IY = 0
      DO J = 1,KOUNT
      IF(TSEQ(J) .EQ. 'R') IR = IR + 1
      IF(TSEQ(J) .EQ. 'K') IK = IK + 1
      IF(TSEQ(J) .EQ. 'H') IH = IH + 1
      IF(TSEQ(J) .EQ. 'C') IC = IC + 1
      IF(TSEQ(J) .EQ. 'D') ID = ID + 1
      IF(TSEQ(J) .EQ. 'E') IE = IE + 1
      IF(TSEQ(J) .EQ. 'Y') IY = IY + 1
      ENDDO
C      Find the N- and C-terminal AA
      N9 = 0
      K9 = 0
      DO J = 1,20
      IF(TSEQ(1) .EQ. AMINOS(J)) N9 = J
      IF(TSEQ(KOUNT) .EQ. AMINOS(J)) K9 = J
      ENDDO
      PI(8) = CNTERM(N9)
      PI(9) = CTERM(K9)
C      Decison made search for pI
c      PIC = MINIF(FUNC,PH1,PH2,XACC,MAXEL)
c      PIC = rtsec(func,PH1,PH2,xacc,MAXEL)

```

```

PIC = zbrent(FUNC,PH1,PH2,XACC,MAXEL)
99  RETURN
    END
C-----C
C      Find charge on the protein          C
C      Author: A. Galat, July 1995         C
C-----C
      FUNCTION FUNC(PH)
C
      COMMON/PIPIA/ IC,ID,IE,IH,IK,IR,IY,PI(9)
      SUM = 0.0
      SUM = SUM - ID*PNCHARGE(6,PH,PI)
      SUM = SUM - IE*PNCHARGE(7,PH,PI)
      SUM = SUM - IC*PNCHARGE(4,PH,PI)
      SUM = SUM - IY*PNCHARGE(3,PH,PI)
      SUM = SUM + IH*PCHARGE(5,PH,PI)
      SUM = SUM + IK*PCHARGE(2,PH,PI)
      SUM = SUM + IR*PCHARGE(1,PH,PI)
      TEM = PCHARGE(8,PH,PI)
      SUM = SUM + TEM
      TEM = PNCHARGE(9,PH,PI)
      SUM = SUM - TEM
      FUNC = SUM
      RETURN
      END
      FUNCTION PCHARGE(N,PH,PI)
      DIMENSION PI(100)
      ALFA = EXP(2.3026*(PH-PI(N)))
      PCHARGE = 1.0/(1.0 + ALFA)
      RETURN
      END
      FUNCTION PNCHARGE(N,PH,PI)
      DIMENSION PI(100)
      ALFA = EXP(2.3026*(PH-PI(N)))
      PNCHARGE = ALFA/(1.0 + ALFA)
      RETURN
      END
C|||||
C-----C
C      The Brent's method of finding the root of a function C
C      FUNC known to lie between X1 and X2                  C
C      Buy and copy it from the book by W.H. Press,         C
C
C      B.P. Flannery, S.A. Teukolsky and W.T. Vetterling    C
C
C      Numerical Recipes - The Art of Scientific Computing  C
C
C      Cambridge University Press, 1996.                     C
C-----C
      FUNCTION zbrent(FUNC,X1,X2,TOL,MAXEL)
      PARAMETER (ITMAX=100,EPS=3.E-8)
      COMMON IC,ID,IE,IH,IK,IR,IY, PI(9)

```
